# Supplementary material for: The pattern of nodal morphogen signaling is shaped by co-receptor expression
Source: eLife. 2021 May 26;10:e54894. doi: 10.7554/eLife.54894 (PMC8266389; doi:10.7554/eLife.54894)
Supplement: Figure 1—source data 1. — The quantified fluorescence intensities are organized in this table. Each row corresponds to an individual nucleus. The following characteristics were quantified: average GFP pixel intensity (‘GFP’), average pixel intensity for α-pSmad2 staining (‘pSmad2Raw’), α-pSmad2 staining intensity normalized to background (‘pSmad2 Normalized’), average DAPI pixel intensity (‘DAPI’), distance from the embryonic margin in μm (‘marginDist’), GFP staining status (‘GFP_Flag’, 0 denotes a cell host nucleus, one denotes a sensor cell nucleus), and embryo replicate number (‘Embryo Number’). We note that normalized α-pSmad2 staining was used to generate the figure panel. [file elife-54894-fig1-data1.xlsx]

## Sheet: Sheet1
GFP	pSmad2Raw	pSmad2Normalized	DAPI	marginDist	GFP_Flag	EmbryoNumber
99.6654	16.6226	2.26826	24.8716	39.7684	1	1
110.785	33.4658	4.56663	34.1215	23.7562	1	1
136.642	62.5033	8.52898	22.9209	26.6092	1	1
24.782	5.46241	0.745381	23.1429	134.661	0	1
25.7746	8.06358	1.10033	21.4364	114.696	0	1
27.8304	7.3087	0.997319	25.2435	97.1335	0	1
24.89	8.13127	1.10956	22.7683	94.4637	0	1
31.8349	11.0557	1.50862	29.0441	77.7106	0	1
23.9557	8.01144	1.09321	24.0401	70.9289	0	1
29.4776	13.3134	1.8167	23.4975	66.6478	0	1
31.9127	12.664	1.72809	25.9471	67.6634	0	1
26.2246	18.5527	2.53164	25.3516	57.6779	0	1
33.8428	25.683	3.50462	26.7396	56.8776	0	1
22.6147	15.0269	2.05052	22.0681	47.4991	0	1
37.027	19.3798	2.6445	28.5281	46.1825	0	1
21.4937	21.2685	2.90222	23.0414	34.8363	0	1
33.8122	39.8171	5.43331	27.7381	30.9176	0	1
27.2155	19.2055	2.62072	27.9023	33.372	0	1
26.6891	24.2786	3.31297	24.0557	30.3515	0	1
23.1571	22.3021	3.04327	25.568	11.6298	0	1
28.269	6.44293	0.87918	20.2418	177.562	0	1
26.191	7.10861	0.970016	18.1948	166.933	0	1
29.3258	6.91785	0.943985	21.0057	115.552	0	1
25.3575	10.9301	1.49148	21.6736	89.8887	0	1
27.4177	6.81325	0.929712	21.0462	89.42	0	1
33.059	8.64172	1.17922	23.7868	91.0216	0	1
29.9748	14.2723	1.94755	23.8467	73.6224	0	1
27.2746	13.9032	1.89718	21.7729	75.3367	0	1
23.489	10.8326	1.47818	19.2335	62.923	0	1
29.7225	13.6621	1.86428	23.0467	56.1834	0	1
32.7983	17.1822	2.34462	25.5922	52.6111	0	1
29.8665	9.66499	1.31885	22.8615	54.468	0	1
37.7639	16.7401	2.28429	24.634	55.2571	0	1
23.1074	23.1918	3.16467	22.1714	19.6201	0	1
28.4881	29.8364	4.07137	26.0422	18.1765	0	1
20.6253	19.1289	2.61026	20.1933	31.304	0	1
23.7364	24.2982	3.31565	23.7696	25.16	0	1
35.3102	46.5008	6.34533	30.4661	23.3216	0	1
20.6427	20.0951	2.74211	23.7541	17.0034	0	1
29.908	64.5521	8.80856	26.6135	9.86	0	1
22.8685	42.9027	5.85436	27.3671	4.08	0	1
23.9687	54.6197	7.45321	23.3758	8.16708	0	1
27.565	11.1973	1.52795	19.9283	198.714	0	1
29.5165	11.652	1.58999	21.1575	194.823	0	1
30.5317	10.4788	1.4299	24.0688	137.168	0	1
26.0625	8.85938	1.20892	19.5656	100.599	0	1
35.9317	9.82919	1.34126	30.1988	65.62	0	1
30.7575	18.2276	2.48728	23.5448	58.6468	0	1
26.9167	7.10539	0.969577	30.0564	45.9315	0	1
24.543	13.2522	1.80835	21.816	40.8906	0	1
25.7205	20.2771	2.76694	23.4241	27.0743	0	1
22.2203	24.3441	3.3219	21.9381	19.1157	0	1
19.5994	25.8674	3.52978	20.5677	6.35172	0	1
24.5717	66.832	9.11965	25.4549	2.72	0	1
21.1375	71.505	9.75732	23.94	4.53617	0	1
84.948	40.3406	8.18937	38.6225	45.1637	1	2
67.5312	46.5535	9.45061	31.6637	19.1882	1	2
81.9212	34.1455	6.93173	42.4471	41.1526	1	2
79.4925	69.1244	14.0326	36.2127	13.94	1	2
64.1242	11.9124	2.41829	35.9347	68.6404	1	2
78.1182	77.8473	15.8034	42.402	4.86806	1	2
60.0885	12.0611	2.44846	32.7832	79.0008	1	2
55.2106	10.675	2.16709	30.198	77.3648	1	2
83.4659	18.7159	3.79943	40.6898	61.6142	1	2
104.49	25.5623	5.18929	36.3826	55.7641	1	2
72.3612	39.2682	7.97167	36.7194	37.2839	1	2
87.1126	61.7495	12.5355	35.5165	25.9761	1	2
80.6129	48.7647	9.89951	31.4378	34.1932	1	2
74.7248	36.6368	7.43748	36.798	41.608	1	2
79.8477	13.6827	2.77767	38.5089	81.2628	1	2
69.5793	11.5668	2.34811	36.8161	38.0754	1	2
52.1683	12.8042	2.59933	31.5307	90.4426	1	2
75.5626	30.4	6.17137	38.8953	56.0681	1	2
22.9084	7.34291	1.49065	43.4704	120.468	0	2
24.7821	7.13991	1.44944	49.6697	110.03	0	2
21.3007	7.81926	1.58735	40.1385	72.0616	0	2
23.4527	6.4589	1.31119	39.4496	172.828	0	2
23.2313	29.2568	5.93929	40.9065	32.3644	0	2
23.9977	15.8106	3.20964	44.3048	63.4125	0	2
22.7291	6.38446	1.29608	41.5339	161.624	0	2
22.6166	7.43573	1.50949	40.6558	89.104	0	2
25.2695	6.49468	1.31846	44.5888	111.845	0	2
28.0308	5.49404	1.11532	50.173	153.801	0	2
29.5761	12.1758	2.47176	53.5848	78.3661	0	2
27.382	7.79101	1.58162	47.5461	141.824	0	2
23.2484	22.3385	4.53484	41.4658	42.4401	0	2
23.7914	5.92246	1.20229	43.4866	152.955	0	2
21.0934	10.0166	2.03343	40.1929	87.9996	0	2
25.0499	5.66759	1.15055	36.8947	119.494	0	2
23.6769	6.283	1.27548	34.9271	131.092	0	2
28.686	6.35531	1.29016	49.714	111.171	0	2
24.0061	15.3796	3.12214	37.5449	49.8457	0	2
23.0311	5.853	1.18819	41.9358	142.055	0	2
26.088	5.55411	1.12752	40.3045	151.032	0	2
23.522	5.79142	1.17569	39.7375	160.126	0	2
23.3149	5.24217	1.06419	39.1114	112.679	0	2
26.1319	6.9316	1.40715	47.0635	105.628	0	2
23.1723	10.1588	2.06229	41.0084	73.8497	0	2
25.2275	5.47191	1.11083	42.2079	135.086	0	2
22.5731	5.50962	1.11848	36.1942	169.872	0	2
27.8082	5.83616	1.18477	46.7193	127.437	0	2
24.0134	6.30916	1.28079	44.5859	153.279	0	2
24.2635	5.75483	1.16826	39.59	143.561	0	2
22.8393	18.4603	3.74755	34.0575	45.6487	0	2
25.9714	5.70802	1.15876	42.3216	109.235	0	2
23.3605	16.5737	3.36454	42.0439	58.5037	0	2
24.2433	50.1381	10.1783	44.1748	25.27	0	2
23.4298	5.90351	1.19845	42.2127	160.417	0	2
27.6101	7.61209	1.5453	46.5166	124.007	0	2
25.7945	46.9345	9.52797	44.2636	18.857	0	2
32.1646	6.28769	1.27644	48.8569	94.035	0	2
28.6265	5.71084	1.15933	59.1526	133.912	0	2
32.6024	18.3527	3.72571	57.1842	58.1489	0	2
21.3656	8.55699	1.73712	43.243	79.1901	0	2
32.9153	5.82912	1.18334	56.6612	131.678	0	2
22.0389	5.51639	1.11986	36.4221	151.701	0	2
23.4553	27.9839	5.68089	43.2196	37.2529	0	2
20.109	5.24567	1.0649	33.0882	187.335	0	2
25.1433	5.06695	1.02862	36.3593	158.871	0	2
25.8896	5.85563	1.18872	44.5287	139.067	0	2
18.2889	4.57172	0.928084	28.1596	178.685	0	2
21.8938	4.68642	0.951369	34.1432	167.96	0	2
24.9846	20.4132	4.144	46.0707	52.0022	0	2
39.4954	51.5904	10.4731	72.3979	26.0649	0	2
23.5887	5.5692	1.13058	40.0546	159.974	0	2
22.4273	4.98647	1.01228	33.7125	185.854	0	2
29.4754	7.30134	1.48221	48.8225	91.0445	0	2
19.1027	4.98859	1.01271	44.2548	136.243	0	2
25.7306	11.2671	2.28729	49.468	60.6964	0	2
26.3131	4.72335	0.958866	39.135	147.058	0	2
25.6555	5.49871	1.11627	38.6555	143.063	0	2
25.685	5.85007	1.1876	43.9436	127.545	0	2
20.1493	4.63966	0.941877	32.3241	187.244	0	2
23.287	5.91124	1.20002	40.3683	83.325	0	2
20.6174	5.26526	1.06888	39.2441	95.6416	0	2
29.7358	7.58228	1.53924	49.6456	112.683	0	2
25.5526	22.6711	4.60235	60.8612	20.948	0	2
22.8462	5.16346	1.04821	33.0633	151.778	0	2
29.6806	9.09677	1.8467	51.0871	49.7517	0	2
22.5102	7.8627	1.59617	44.8238	69.4882	0	2
19.7957	4.55745	0.925187	29.8532	190.44	0	2
26.2205	9.96164	2.02227	44.9329	78.1453	0	2
19.5188	5.56452	1.12963	36.5484	111.001	0	2
21.651	5.14347	1.04415	37.6895	106.133	0	2
31.6618	5.59913	1.13665	55.2813	129.961	0	2
31.7131	23.7844	4.82836	53.9003	58.6192	0	2
27.2985	6.74112	1.36848	43.9472	122.402	0	2
23.2804	5.9081	1.19938	43.7882	94.1211	0	2
22.3556	5.13365	1.04216	36.0788	150.362	0	2
20.4145	5.65351	1.14769	42.0351	89.1111	0	2
25.003	11.9985	2.43576	43.7853	72.2026	0	2
30.9822	64.591	13.1123	64.824	30.3573	0	2
19.6121	4.29723	0.872361	29.4433	199.537	0	2
25.1985	6.17557	1.25368	42.3486	158.532	0	2
24.3361	5.32446	1.08089	39.9085	130.041	0	2
21.8385	4.84957	0.984489	33.6597	171.211	0	2
21.6296	4.62346	0.938587	48.8148	120.537	0	2
22.3991	5.4081	1.09787	31.2461	203.868	0	2
31.9927	26.6648	5.41311	56.439	51.0521	0	2
24.0413	6.90826	1.40241	40.3991	113.406	0	2
30.8909	7.88976	1.60167	52.0157	100.178	0	2
21.2965	5.09884	1.03509	34.9448	138.605	0	2
28.3543	5.87407	1.19247	44.8988	171.668	0	2
22.9732	5.42679	1.10167	37.7571	128.806	0	2
19.4442	4.58372	0.930521	27.5558	199.65	0	2
22.26	4.69979	0.954083	32.2854	181.703	0	2
22.167	4.32394	0.877785	42.3038	109.195	0	2
22.9737	5.3502	1.08612	33.1761	190.385	0	2
26.6358	13.6976	2.78068	45.426	61.4197	0	2
25.1471	6.12395	1.2432	43.7605	144.174	0	2
24.011	8.12756	1.64994	48.5244	95.0931	0	2
21.0329	4.21412	0.855489	44.24	104.43	0	2
25.0426	10.5984	2.15153	50.2028	84.2521	0	2
22.3577	4.63487	0.940905	31.5931	201.47	0	2
29.7579	5.92015	1.20182	41.6324	160.847	0	2
24.4602	5.97211	1.21237	43.8546	126.037	0	2
23.6407	6.17037	1.25262	38.95	137.866	0	2
21.1291	4.9	0.994727	31.7745	192.348	0	2
29.5302	9.2259	1.87291	50.3388	88.1492	0	2
21.7147	5.84522	1.18661	37.6164	117.663	0	2
19.0985	4.69365	0.952838	27.7702	215.289	0	2
23.2745	5.95024	1.20793	44.443	105.924	0	2
24.3786	11.7705	2.38948	49.603	74.5477	0	2
18.6589	4.17349	0.847242	31.0721	126.94	0	2
22.3516	5.6276	1.14243	39.4612	134.058	0	2
23.4035	6.30799	1.28056	38.7135	143.482	0	2
24.2195	16.966	3.44418	43.1338	47.6121	0	2
20.8928	5.84026	1.18561	37.919	149.669	0	2
24.3342	5.2529	1.06637	33.3484	188.511	0	2
24.4673	10.9743	2.22785	45.6187	79.0008	0	2
18.6077	4.41795	0.896868	24.9026	203.191	0	2
24.0873	5.02381	1.01986	45.4663	168.934	0	2
22.9234	5.36346	1.08881	39.9194	129.07	0	2
20.6448	4.80695	0.975838	39.2664	180.488	0	2
29.2308	40.4499	8.21155	52.7913	20.0715	0	2
22.3905	4.90024	0.994777	32.1898	154.915	0	2
21.9893	4.88612	0.99191	34.9004	216.03	0	2
26.7606	10.8306	2.19868	48.1026	81.5164	0	2
26.8346	14.7432	2.99295	50.9767	64.4899	0	2
25.8753	15.4813	3.14279	41.3042	51.8987	0	2
21.4418	4.66102	0.946212	30.6983	201.005	0	2
19.424	5.04183	1.02352	27.4183	188.04	0	2
29.6031	37.5751	7.62796	54.5306	23.9187	0	2
19.8213	5.39211	1.09463	35.2645	145.18	0	2
21.3842	5.33898	1.08384	33.71	159.8	0	2
24.3233	46.9048	9.52194	46.8852	6.46	0	2
26.2747	13.3032	2.70062	43.6616	74.8	0	2
23.7843	12.5575	2.54924	39.9878	46.9988	0	2
19.3797	4.9212	0.999032	34.947	135.341	0	2
28.1405	7.73171	1.56958	49.1502	111.222	0	2
23.4248	4.89524	0.993761	36.0686	178.186	0	2
24.6521	23.8521	4.84211	44.237	41.2803	0	2
24.5735	5.53555	1.12375	44.7251	121.438	0	2
21.8793	8.31348	1.68768	50.0658	98.0527	0	2
20.4938	4.47119	0.907677	27.6049	214.154	0	2
28.3022	28.5758	5.80105	55.2259	20.4707	0	2
31.5691	26.3536	5.34993	50.2882	32.2194	0	2
21.0888	9.45845	1.92012	43.3954	88.8077	0	2
19.0915	4.06972	0.826175	34.4597	127.783	0	2
24.4358	5.02674	1.02046	37.6711	160.687	0	2
21.1556	4.45455	0.904298	40.2188	145.538	0	2
23.0815	4.42545	0.89839	37.7177	190.323	0	2
20.0835	4.56703	0.927133	31.9451	168.575	0	2
20.0431	4.0546	0.823106	27.8592	198.738	0	2
29.4818	37.481	7.60886	50.8459	13.6085	0	2
22.2239	4.5	0.913525	47.8466	119.399	0	2
26.8711	10.3238	2.0958	64.1649	34.7416	0	2
25.0985	8.63881	1.75373	59.8746	46.401	0	2
18.3518	4.73367	0.960961	25.3518	211.204	0	2
18.9486	4.12219	0.836827	26.8167	195.567	0	2
22.49	5.09534	1.03438	64.6253	104.839	0	2
23.2314	10.4057	2.11242	42.7433	81.405	0	2
19.3686	3.72893	0.756993	37.5587	149.835	0	2
23.7222	17.1984	3.49137	49.5608	64.8126	0	2
25.951	11.6961	2.37437	52.6765	90.0538	0	2
26.2857	24.5163	4.97695	60.8571	23.8727	0	2
19.0625	4.82639	0.979784	27.7972	211.738	0	2
19.4929	4.30226	0.873383	33.6667	161.976	0	2
20.0422	4.01489	0.815045	47.8734	110.036	0	2
21.351	4.97419	1.00979	45.6568	119.57	0	2
30.5299	8.13323	1.65109	65.6417	69.9194	0	2
18.1933	4.05424	0.823034	26.0083	190.829	0	2
22.6734	27.1106	5.50359	46.3618	43.7914	0	2
17.2574	3.75	0.761271	25.6029	202.584	0	2
27.8895	30.5068	6.19305	51.6207	6.87607	0	2
16.8441	4.23656	0.860045	29.0161	144.162	0	2
30.2887	8.83505	1.79356	51.0825	27.5253	0	2
18.9624	5.73882	1.16501	39.1699	120.357	0	2
30.6991	33.9045	6.88281	52.3628	42.8697	0	2
19.236	4.0764	0.827532	29.4533	185.345	0	2
23.7221	19.8809	4.03593	50.8318	55.6957	0	2
21.4836	8.29812	1.68456	41.0235	74.9582	0	2
18.738	4.07987	0.828237	25.5447	206.814	0	2
15.3573	4.25072	0.86292	22.3487	197.836	0	2
30.2528	39.1314	7.94389	60.2153	25.3887	0	2
21.6282	6.62731	1.34538	39.1227	102.759	0	2
24.5654	4.77827	0.970016	58.2594	136.749	0	2
16.8967	4.46694	0.906814	28.2355	211.382	0	2
25.1433	16.5114	3.35191	50.4511	60.9397	0	2
23.0082	8.80082	1.78662	53.23	89.2103	0	2
28.2539	29.1218	5.91188	51.9794	38.3492	0	2
20.0713	6.91351	1.40348	36.8892	111.376	0	2
16.5749	4.09091	0.830477	27.2113	178.937	0	2
32.0024	32.0307	6.50242	56.4704	27.3103	0	2
20.2288	4.79009	0.972416	32.3844	104.082	0	2
31.189	33.0695	6.71329	52.8433	14.0885	0	2
17.0236	4.03261	0.818642	29.3315	146.943	0	2
25.3943	14.6792	2.97995	50.7721	69.6278	0	2
25.5824	43.0663	8.74269	42.5855	1.52053	0	2
27.1426	39.4258	8.00366	55.973	26.5505	0	2
35.6731	21.7543	4.41624	75.9145	60.2251	0	2
17.6585	4.96608	1.00814	30.6164	127.7	0	2
28.6675	24.8474	5.04415	55.1931	45.1317	0	2
20.8285	8.28052	1.68099	39.7863	94.7405	0	2
16.3783	4.16312	0.845137	22.0496	206.131	0	2
16.0995	3.59953	0.730724	24.5806	186.07	0	2
16.0504	3.78655	0.768692	28.5597	160.211	0	2
24.8183	38.3373	7.78268	51.8622	10.88	0	2
16.8619	4.01775	0.815626	25.6075	151.319	0	2
19.729	7.23043	1.46782	42.0957	104.049	0	2
29.8648	11.9674	2.42944	62.5431	70.0408	0	2
22.207	11.0336	2.23988	41.6707	82.62	0	2
22.7936	23.6477	4.80062	49.8617	52.02	0	2
22.4617	19.1926	3.8962	52.7448	62.9	0	2
17.2618	3.96912	0.805753	23.5662	202.98	0	2
22.471	6.10714	1.23978	42.2991	123.76	0	2
26.786	42.6408	8.65633	45.0492	5.78	0	2
18.4841	4.34511	0.882082	31.8881	151.98	0	2
22.5979	5.26748	1.06933	50.4178	109.825	0	2
27.8643	28.0725	5.69887	53.1357	40.4957	0	2
25.5912	13.8397	2.80955	44.3084	70.1398	0	2
27.6717	31.4796	6.39053	66.1604	54.5528	0	2
27.1637	9.12961	1.85336	48.3396	91.7124	0	2
24.569	7.99823	1.62369	40.9956	142.656	0	2
16.4275	25.8973	5.25729	33.1208	24.2999	0	2
22.117	16.5195	3.35355	48.2193	40.8113	0	2
23.0802	8.44321	1.71402	42.9889	83.6704	0	2
27.3565	17.8778	3.62928	47.8659	49.9754	0	2
18.38	14.5574	2.95524	42.3497	18.3726	0	2
24.7027	5.69601	1.15632	38.1346	132.246	0	2
21.5896	9.67839	1.96477	37.8174	57.5595	0	2
18.8615	4.59859	0.93354	30.8685	169.582	0	2
28.1727	6.39607	1.29844	47.365	124.632	0	2
18.6341	25.6652	5.21018	36.3526	30.0588	0	2
23.3839	5.87093	1.19183	40.9631	161.771	0	2
23.033	5.72527	1.16226	40.2225	122.646	0	2
19.9351	23.5743	4.78572	33.5865	26.1292	0	2
20.5232	8.21854	1.66841	39.2362	53.6748	0	2
19.9262	6.52061	1.32372	33.9696	142.145	0	2
25.6321	5.40707	1.09767	40.3476	170.094	0	2
22.7222	23.3136	4.73279	37.3595	38.7734	0	2
24.1575	5.52742	1.1221	38.3988	179.487	0	2
23.1842	5.03289	1.02171	43.3013	126.909	0	2
20.9682	56.899	11.5508	39.7036	8.36289	0	2
28.0053	50.5107	10.2539	46.4776	30.2141	0	2
22.5419	15.3645	3.11909	38.2496	47.5028	0	2
22.0421	5.14139	1.04373	35.3455	172.332	0	2
25.2729	5.17949	1.05146	37.8681	138.428	0	2
19.8885	4.76557	0.967438	30.8623	179.033	0	2
20.4676	29.3836	5.96503	42.4027	40.7901	0	2
21.3883	5.52063	1.12072	34.707	168.369	0	2
21.1874	4.99097	1.01319	34.535	151.071	0	2
27.3002	51.5439	10.4637	46.8939	17.4861	0	2
23.8609	31.4365	6.38177	42.5168	30.8671	0	2
22.2097	4.81054	0.976566	30.079	172.266	0	2
32.4984	27.024	5.48603	52.5321	45.2251	0	2
24.0792	5.98602	1.2152	41.5016	92.0553	0	2
24.3643	4.80297	0.97503	41.4796	136.809	0	2
19.6623	4.78247	0.970868	31.4448	164.977	0	2
27.7301	8.94352	1.81558	54.3115	69.7928	0	2
24.2763	16.8427	3.41916	41.1669	56.4123	0	2
22.7237	4.61369	0.936605	32.0562	182.962	0	2
19.5242	4.77053	0.968443	28.0968	188.179	0	2
22.4321	7.54876	1.53244	41.5124	113.892	0	2
20.0301	4.94658	1.00418	32.4124	143.929	0	2
19.5868	4.11777	0.83593	37.2893	98.8605	0	2
20.4478	5.40647	1.09754	28.2716	196.188	0	2
23.7935	8.9764	1.82226	40.7257	79.3512	0	2
24.6348	5.12696	1.0408	45.0799	107.522	0	2
20.2565	36.4433	7.39819	34.8392	11.4696	0	2
22.017	4.82197	0.978887	35.0341	149.39	0	2
23.0452	7.65591	1.55419	42.2645	92.5906	0	2
22.2785	4.9375	1.00234	31.6236	159.492	0	2
27.922	10.1561	2.06173	46.1354	85.5592	0	2
24.2435	12.777	2.59379	53.4219	67.0662	0	2
21.3581	65.1537	13.2266	49.6146	11.1373	0	2
27.1854	5.72584	1.16238	41.4852	117.273	0	2
35.8125	12.2601	2.48886	53.1109	76.3601	0	2
19.4793	5.00541	1.01613	35.8144	130.397	0	2
19.2481	4.92636	1.00008	24.8101	209.855	0	2
25.1207	7.07184	1.43562	42.204	99.4202	0	2
22.501	5.62347	1.1416	30.3143	180.891	0	2
21.4332	4.46599	0.906622	27.5315	204.663	0	2
18.3634	4.44893	0.903158	23.291	198.15	0	2
23.9597	9.25183	1.87817	42.5733	87.3211	0	2
27.5714	5.60248	1.13734	44.1429	117.327	0	2
34.8829	19.0778	3.87289	54.6575	38.8523	0	2
22.1311	6.07004	1.23225	39.5618	101.494	0	2
20.393	5.01167	1.0174	32.4786	194.034	0	2
26.7822	5.10166	1.03567	35.7178	137.091	0	2
24.1331	6.51711	1.32301	41.7072	108.494	0	2
20.9681	4.26387	0.865588	33.8773	180.203	0	2
20.9183	6.47596	1.31466	40.1106	97.58	0	2
18.7194	4.1502	0.842513	30.1897	214.88	0	2
24.2633	22.615	4.59098	45.8319	37.4	0	2
27.7867	23.7867	4.82884	52.7085	53.04	0	2
25.0498	24.3887	4.95103	40.2683	29.2578	0	2
21.2513	7.92917	1.60967	36.8516	71.8977	0	2
20.6443	43.7371	8.87888	37.4143	2.72	0	2
25.6338	21.7792	4.42129	41.7612	51.2092	0	2
26.427	10.3769	2.10657	48.2353	74.6058	0	2
18.5977	4.44402	0.902161	27.112	161.709	0	2
28.0825	10.2444	2.07968	62.9016	58.0136	0	2
27.3451	24.899	5.05464	48.7621	42.8157	0	2
23.0047	8.26761	1.67837	45.4155	94.8314	0	2
25.5833	20.9354	4.25	41.1667	61.6217	0	2
22.7357	3.99119	0.810234	44.815	105.981	0	2
24.769	8.39047	1.70331	41.1146	80.6452	0	2
20.3856	4.53137	0.919892	31.9908	129.184	0	2
18.4169	4.2531	0.863403	28.3573	167.409	0	2
28.7621	14.1072	2.86384	44.8191	72.6932	0	2
24.3333	4.96484	1.00789	54.1364	96.4816	0	2
29.3713	31.8152	6.45866	54.0967	36.4324	0	2
23.8183	4.1	0.832323	47.8944	110.968	0	2
26.2751	17.7051	3.59424	48.0326	66.0843	0	2
24.0107	42.8948	8.70789	41.0789	12.635	0	2
21.1781	4.54521	0.922702	27.8849	162.489	0	2
19.3345	3.70819	0.752782	29.4448	190.141	0	2
27.5913	7.29567	1.48106	62.6347	77.9186	0	2
28.7616	28.7171	5.82972	51.9167	48.3231	0	2
20.7359	4.14375	0.841204	29.7578	167.272	0	2
25.8694	36.4635	7.40228	47.1011	32.7831	0	2
18.1694	4.71935	0.958055	29.2194	133.284	0	2
34.124	29.4711	5.98279	60.3595	37.0662	0	2
19.1333	5.28372	1.07262	32.0853	116.96	0	2
23.2715	12.0524	2.44671	43.7648	76.16	0	2
22.1179	8.62645	1.75122	38.1506	96.9006	0	2
20.8993	4.28079	0.869025	30.8185	170.003	0	2
17.8185	4.23456	0.859638	28.3774	133.342	0	2
24.6626	9.19478	1.86659	40.5148	66.259	0	2
26.3649	6.34483	1.28804	42.1566	152.708	0	2
26.1718	7.55168	1.53303	39.9457	140.613	0	2
20.8742	29.6695	6.02308	41.6397	36.1888	0	2
27.079	9.94179	2.01824	47.9688	79.7443	0	2
21.8474	18.5282	3.76132	37.0552	47.9207	0	2
26.1969	5.94118	1.20609	40.0384	145.377	0	2
24.4194	9.57875	1.94454	44.6395	87.1369	0	2
26.5691	5.8902	1.19574	38.6411	151.579	0	2
21.6628	38.9099	7.89892	38.6017	30.94	0	2
23.4106	10.1065	2.05169	40.9839	96.6282	0	2
22.4346	4.91353	0.997473	34.3814	181.29	0	2
25.7058	5.95295	1.20848	35.0119	146.518	0	2
19.8294	4.87647	0.989951	31.9647	141.106	0	2
22.7103	4.67436	0.948921	34.8051	169.791	0	2
21.2033	9.72546	1.97432	39.6386	59.2908	0	2
24.4187	5.46694	1.10982	37.6143	140.982	0	2
19.6466	4.44471	0.902301	28.988	175.452	0	2
28.3154	6.96094	1.41311	50.1572	108.439	0	2
23.8928	7.25561	1.47293	40.2095	77.9513	0	2
18.6842	4.78947	0.97229	28.39	180.208	0	2
23.9646	5.80051	1.17753	38.6995	125.389	0	2
19.6108	4.69189	0.95248	28.9919	191.895	0	2
18.3922	4.44876	0.903124	27.2862	151.338	0	2
24.3566	6.776	1.37557	40.9314	77.8511	0	2
24.1481	17.4393	3.54028	46.9854	53.1097	0	2
21.5403	4.98039	1.01105	36.4946	163.713	0	2
22.9469	5.31871	1.07973	37.0208	130.918	0	2
24.2618	6.02947	1.22402	33.1364	183.649	0	2
22.5786	5.08479	1.03224	29.2219	193.31	0	2
21.9866	4.73995	0.962236	33.1233	173.925	0	2
21.9883	5.76358	1.17004	36.1263	109.888	0	2
21.8223	5.97934	1.21384	40.219	163.786	0	2
18.0689	4.27264	0.867369	24.2451	210.335	0	2
20.338	6.0939	1.23709	31.7449	129.428	0	2
24.3974	5.8956	1.19684	36.6648	122.332	0	2
20.5132	4.75923	0.96615	32.3163	130.236	0	2
18.5852	5.04723	1.02462	24.7433	208.77	0	2
19.7705	4.73556	0.961346	32.9514	120.7	0	2
23.5609	13.2688	2.69363	44.2203	67.66	0	2
17.4292	4.45575	0.904543	27.7788	128.524	0	2
27.5864	8.35391	1.69589	45.5638	95.7358	0	2
20.0275	4.61722	0.937321	28.8883	139.18	0	2
21.1569	5.55229	1.12715	37.9592	116.757	0	2
19.9121	4.55395	0.924477	31.6819	138.41	0	2
28.9054	19.6543	3.98992	48.9845	59.2498	0	2
24.6965	8.59823	1.74549	47.28	98.9686	0	2
23.89	38.9364	7.90431	43.022	11.545	0	2
36.5125	45.6507	9.26734	62.1919	22.024	0	2
18.2155	3.64031	0.739003	32.7349	147.182	0	2
32.2388	32.6717	6.63254	61.5781	52.792	0	2
15.6544	3.8125	0.773959	22.0441	190.153	0	2
27.053	23.3607	4.74234	45.2522	43.299	0	2
25.7728	6.81136	1.38274	48.7769	90.7845	0	2
26.8139	15.3241	3.11087	45.5734	58.6113	0	2
22.2684	5.04737	1.02464	32.3684	138.438	0	2
27.6633	14.8518	3.01499	49.3568	66.8867	0	2
26.7487	34.5434	7.0125	52.3355	15.1786	0	2
17.8356	3.19153	0.647897	27.2186	198.957	0	2
22.4363	9.27027	1.88192	41.0985	100.709	0	2
16.1538	3.5305	0.716712	24.6472	160.82	0	2
18.7318	5.50575	1.1177	30.659	126.48	0	2
30.5304	16.3482	3.31877	50.9636	63.24	0	2
20.0221	4.71656	0.957489	29.5583	143.14	0	2
20.2005	5.75198	1.16768	37.9974	105.74	0	2
28.5776	31.024	6.29805	54.5906	40.8014	0	2
30.4084	36.3514	7.37954	49.8981	21.76	0	2
16.4495	4.07744	0.827743	26.6246	157.813	0	2
33.1939	38.1816	7.75108	55.7063	53.9015	0	2
21.7746	11.8008	2.39563	38.3642	56.2245	0	2
23.4908	6.3041	1.27977	39.5686	111.243	0	2
29.4008	7.35932	1.49398	55.0492	127.631	0	2
19.7465	54.9508	11.1553	34.4869	9.62266	0	2
22.1864	7.52966	1.52856	37.6525	136.364	0	2
16.9926	57.6109	11.6953	29.4151	3.20755	0	2
24.7703	7.5936	1.54154	40.1318	102.448	0	2
21.0991	9.73333	1.97592	42.1153	58.4177	0	2
21.1498	24.7137	5.01701	37.7621	41.9456	0	2
20.6908	5.13466	1.04237	32.3367	162.67	0	2
23.6517	56.5014	11.4701	38.6842	18.2621	0	2
20.9482	4.89498	0.993708	30.7382	183.242	0	2
18.6235	4.4321	0.899741	28.8611	168.984	0	2
21.5057	11.916	2.41901	44.1994	66.3061	0	2
22.3566	4.24009	0.860763	44.9685	87.5129	0	2
18.8309	5.16332	1.04818	27.1433	191.211	0	2
26.6758	5.0989	1.03511	40.5659	105.981	0	2
23.5397	5.77815	1.173	40.8924	90.3255	0	2
22.3261	4.69398	0.952904	35.7542	168.579	0	2
31.0412	12.9748	2.63396	46.5446	65.068	0	2
21.4129	3.85161	0.781899	40.8065	107.698	0	2
21.1957	4.08563	0.829405	40.8287	112.367	0	2
19.4281	5.78686	1.17476	26.1545	215.472	0	2
21.432	6.26566	1.27196	30.9957	147.233	0	2
22.8101	6.01364	1.2208	31.6548	179.513	0	2
20.4414	4.85802	0.986206	30.6235	189.773	0	2
18.0129	4.34764	0.882595	26.8498	217.924	0	2
22.0472	5.02722	1.02055	34.7205	164.264	0	2
23.8155	6.45955	1.31132	54.1553	61.5766	0	2
21.9197	5.86653	1.19094	28.9969	199.356	0	2
31.5576	67.4552	13.6938	57.6855	6.8	0	2
25.5747	35.1284	7.13127	46.6147	26.0738	0	2
25.6991	9.5979	1.94843	48.5125	89.0255	0	2
22.2289	6.00429	1.2189	37.2246	109.263	0	2
25.9142	11.509	2.33639	41.008	75.2315	0	2
19.1288	3.96693	0.805308	26.376	171.665	0	2
15.9345	3.68621	0.748321	21.3828	197.767	0	2
27.6912	34.7973	7.06404	49.0653	38.3492	0	2
21.1602	6.86728	1.3941	37.9268	84.2192	0	2
22.0452	5.70588	1.15833	34.3213	112.386	0	2
29.5981	34.7896	7.06247	52.9304	39.9887	0	2
28.55	19.4848	3.95552	42.7239	54.1892	0	2
27.0059	46.6292	9.466	52.3368	34.4761	0	2
26.5431	24.9713	5.06931	54.4778	60.6574	0	2
19.5222	49.9654	10.1433	34.2273	24.5413	0	2
20.8993	5.86417	1.19046	36.4145	166.552	0	2
21.8701	26.5795	5.3958	35.3214	32.8465	0	2
22.6972	5.97887	1.21374	37.9859	142.873	0	2
18.3353	48.3098	9.80715	37.991	22.5454	0	2
21.5249	5.10689	1.03673	33.6271	161.898	0	2
19.203	6.04487	1.22714	34.0385	82.2463	0	2
23.8175	5.20532	1.05671	40.2814	168.833	0	2
25.6861	21.9626	4.45853	45.5468	45.9013	0	2
20.0614	5.07673	1.0306	31.8542	180.744	0	2
19.0087	5.02183	1.01946	31.714	94.1898	0	2
21.9346	24.7673	5.0279	38.0717	27.149	0	2
20.75	5.10338	1.03601	29.3618	180.072	0	2
21.4444	5.12929	1.04128	34.3131	92.9046	0	2
26.0121	9.76985	1.98333	52.2275	42.0557	0	2
22.587	5.2369	1.06312	32.7841	134.102	0	2
21.9922	5.26494	1.06881	31.4883	171.101	0	2
21.0226	6.89236	1.39919	35.9358	83.539	0	2
18.1815	5.11146	1.03766	26.5764	172.188	0	2
24.6089	4.73671	0.961578	48.5101	89.0157	0	2
29.1056	85.6433	17.3861	50.9259	14.0186	0	2
27.7506	6.2494	1.26866	48.3237	66.6478	0	2
20.6944	8.07285	1.63883	35.6594	113.065	0	2
27.5517	14.5996	2.9638	40.9368	72.4615	0	2
23.9917	38.6302	7.84214	42.3582	35.6741	0	2
30.227	51.1336	10.3804	51.976	40.0941	0	2
27.3873	39.6103	8.04111	50.7819	29.6892	0	2
16.6395	4.10853	0.834054	21.1938	208.61	0	2
21.6429	9.14881	1.85726	39.5873	87.6969	0	2
16.5271	5.65158	1.1473	31.7398	99.1058	0	2
25.4242	53.956	10.9534	51.5582	18.6008	0	2
22.7814	11.2911	2.29215	37.6533	79.29	0	2
27.7645	34.7645	7.05739	48.0182	26.8858	0	2
19.3875	8.13668	1.65179	31.6315	92.942	0	2
28.6517	46.0821	9.35492	52.1963	68.1028	0	2
33.2957	34.8268	7.07004	51.1031	20.2007	0	2
15.5719	3.77124	0.765583	23.4346	153.686	0	2
16.7382	3.90987	0.793726	21.8112	206.38	0	2
20.5	7.52963	1.52856	30.5667	131.943	0	2
22.1494	5.31034	1.07803	30.5057	157.696	0	2
16.4788	15.7566	3.19868	38.1825	52.6078	0	2
22.0894	11.3504	2.3042	39.8093	67.5429	0	2
19.2918	6.0102	1.2201	30.5551	150.405	0	2
20.5974	26.5006	5.37977	34.4791	31.7586	0	2
21.6003	8.50528	1.72662	33.279	131.042	0	2
20.0735	5.92157	1.20211	33.7222	80.3357	0	2
19.6461	6.14286	1.24703	39.1898	106.659	0	2
23.1615	6.9677	1.41448	34.5416	137.119	0	2
22.0912	5.76292	1.1699	36.617	148.145	0	2
23.616	5.46273	1.10896	40.872	166.67	0	2
20.2096	5.04044	1.02324	35.3989	72.6073	0	2
22.5985	7.34261	1.49059	43.9636	52.2893	0	2
22.2523	8.25394	1.6756	39.0133	68.963	0	2
18.6614	5.12342	1.04008	33.2816	163.461	0	2
22.5389	5.7781	1.17299	38.9107	72.7354	0	2
23.0569	5.18679	1.05295	33.6105	101.355	0	2
22.4056	4.02261	0.816611	43.6968	92.8754	0	2
24.2662	6.6506	1.35011	36.3352	146.428	0	2
20.1148	63.719	12.9353	38.139	19.161	0	2
27.0657	24.7574	5.0259	46.4914	112.511	0	2
19.0907	4.41856	0.896992	27.9093	190.678	0	2
21.6583	5.59306	1.13542	38.0014	145.115	0	2
17.8069	4.68783	0.951656	29.6085	138.054	0	2
22.5154	7.27308	1.47648	30.109	185.208	0	2
18.6996	4.56522	0.926765	25.5296	211.569	0	2
32.8547	70.6253	14.3373	50.6507	20.804	0	2
28.8361	7.03097	1.42733	52.3832	72.4487	0	2
18.141	6.71429	1.36304	32.2143	108.391	0	2
26.3842	63.4466	12.88	52.1724	15.9945	0	2
24.2079	58.9176	11.9606	44.8459	22.36	0	2
27.1032	24.4772	4.96901	50.7607	31.9546	0	2
18.0486	5.95233	1.20836	27.7257	116.121	0	2
18.5311	4.82872	0.980257	27.1765	214.512	0	2
23.9324	39.0249	7.92228	37.8742	52.2074	0	2
18.9053	5.16682	1.04889	27.7713	160.48	0	2
18.526	4.7474	0.96375	25.3529	213.52	0	2
19.9304	8.33333	1.69171	32.5244	95.0797	0	2
20.616	5.1635	1.04822	45.7643	116.33	0	2
21.8507	7.42953	1.50824	34.4732	164.876	0	2
20.6488	50.7384	10.3002	36.5163	26.3121	0	2
22.4347	16.6769	3.38551	38.2173	70.4818	0	2
18.4325	16.4364	3.33667	46.3961	13.6847	0	2
23.0958	8.64691	1.75537	37.7238	76.8769	0	2
20.9152	5.40661	1.09757	29.9411	174.394	0	2
19.8435	5.48984	1.11447	33.8435	154.767	0	2
22.1236	6.30682	1.28032	54.4787	70.2542	0	2
20.7123	7.16566	1.45467	30.1461	148.35	0	2
22.1339	10.7972	2.1919	38.3317	60.5668	0	2
18.655	5.40083	1.0964	28.9215	176.684	0	2
19.9857	8.00358	1.62477	38.0227	53.2249	0	2
22.995	19.0714	3.87161	38.6967	38.9267	0	2
23.4158	11.8136	2.39823	39.3778	139.243	0	2
18.0291	5.49934	1.1164	31.0727	81.9231	0	2
18.9371	6.22378	1.26346	28.8392	191.84	0	2
21.9059	9.94595	2.01908	40.3453	74.0553	0	2
21.3403	11.3388	2.30185	39.8156	70.6685	0	2
23.8123	6.46774	1.31299	34.0161	174.966	0	2
18.8283	5.22475	1.06065	25.8561	205.862	0	2
20.0455	5.2	1.05563	31.2477	130.583	0	2
20.0495	5.65347	1.14768	27.2252	189.498	0	2
24.1333	58.018	11.778	51.9874	31.4293	0	2
19.6202	8.64503	1.75499	32.9144	176.493	0	2
22.4385	10.4585	2.12313	45.2757	15.484	0	2
20.6564	4.6872	0.951528	40.0166	103.003	0	2
20.4222	6.2138	1.26144	34.2923	118.252	0	2
29.7577	16.2535	3.29955	57.032	63.0056	0	2
16.46	3.58615	0.728008	25.0124	186.276	0	2
26.2538	38.1951	7.75381	42.9941	47.5028	0	2
19.1889	6.58717	1.33723	31.9286	114.933	0	2
17.0422	3.47493	0.705431	32.6306	129.594	0	2
18.3233	8.94816	1.81653	38.8854	80.0626	0	2
18.7293	12.3731	2.5118	38.2098	83.7815	0	2
19.151	6.0026	1.21856	32.2969	164.735	0	2
21.3166	8.29459	1.68385	33.3868	150.784	0	2
18.8904	6.02528	1.22317	29.2416	169.833	0	2
20.8371	7.24079	1.46992	32.6955	152.298	0	2
17.9626	5.78055	1.17348	33.0324	82.3629	0	2
19.7539	5.69291	1.15569	30.5906	166.874	0	2
17.5323	5.07834	1.03093	27.9032	156.682	0	2
16.2252	5.17822	1.05121	29.1782	101.496	0	2
19.7737	8.5764	1.74106	33.795	178.617	0	2
17.4227	5.74155	1.16557	29.2923	126.531	0	2
22.8244	14.9986	3.0448	43.1388	70.4752	0	2
22.3427	4.8042	0.975278	31.1154	167.916	0	2
19.0605	4.99644	1.01431	29.7509	168.018	0	2
19.2231	6.17692	1.25395	30.5769	210.516	0	2
17.9918	5.50412	1.11737	23.9198	195.401	0	2
20.0853	5.43923	1.10419	30.2324	129.122	0	2
16.7069	4.90172	0.995077	27.4862	207.051	0	2
22.1481	6.76923	1.37419	31.7493	217.94	0	2
28.9581	15.3951	3.1253	53.7704	21.1785	0	2
19.7717	5.56304	1.12933	35.7848	112.467	0	2
24.684	40.3453	8.19033	43.016	47.2893	0	2
17.1287	4.27574	0.867998	24.2537	195.795	0	2
16.6822	4.417	0.896676	26.0263	124.007	0	2
16.5032	5.57474	1.1317	24.2758	164.299	0	2
15.7337	3.99246	0.810492	21.0779	198.595	0	2
16.5978	3.21377	0.652413	30.9312	135.32	0	2
21.4535	9.1875	1.86511	36.3052	98.3076	0	2
23.6168	11.6701	2.36909	40.4406	56.3457	0	2
16.257	30.3028	6.15163	31.8765	33.398	0	2
16.6426	14.6926	2.98268	34.937	53.7716	0	2
17.4595	7.94286	1.61244	37.0024	94.6215	0	2
14.9035	6.24257	1.26728	31.5124	94.735	0	2
22.9585	5.71698	1.16058	44.4717	178.541	0	2
13.3133	10.8038	2.19323	30.6582	61.7603	0	2
18.4057	4.71174	0.95651	34.0712	183.356	0	2
16.7534	13.4821	2.73693	30.9305	47.1363	0	2
16.1905	6.56762	1.33326	38.4571	70.1834	0	2
15.4545	6.86777	1.3942	33.281	83.2778	0	2
16.9057	4.39151	0.891501	36.0896	175.198	0	2
17.994	6.06647	1.23153	27.6979	160.181	0	2
15.037	5.38095	1.09236	29.1005	94.6941	0	2
16.4412	4.26716	0.866257	25.5368	141.468	0	2
17.2045	5.97199	1.21235	24.4286	174.008	0	2
15.0039	5.29883	1.07569	28.4551	96.3497	0	2
16.1683	5.9044	1.19863	29.8757	105.381	0	2
16.1772	6.06527	1.23128	32.8858	91.4467	0	2
17.5291	7.34496	1.49107	33.2888	110.513	0	2
15.337	5.17505	1.05056	31.6105	116.96	0	2
17.4031	10.4684	2.12515	29.2266	218.36	0	2
16.2215	3.19218	0.648031	29.8795	138.582	0	2
20.4719	9.39123	1.90647	30.5	169.229	0	2
16.7162	4.45545	0.90448	32.363	129.889	0	2
16.9897	4.02584	0.817268	24.5788	187.834	0	2
17.3326	6.97658	1.41628	26.459	142.224	0	2
16.8555	8.03263	1.63067	28.6597	122.153	0	2
147.138	29.5719	3.9187	60.1836	52.6517	1	3
150.612	27.5345	3.64872	66.4637	59.16	1	3
82.4312	18.9515	2.51135	54.8596	68.7414	1	3
155.182	11.8231	1.56673	54.0467	85.0795	1	3
119.449	22.708	3.00913	57.8618	74.0482	1	3
139.473	14.9624	1.98273	66.8952	86.8173	1	3
96.4118	20.4419	2.70885	66.7935	69.02	1	3
171.539	11.2817	1.49498	64.7521	97.5255	1	3
165.973	10.8288	1.43497	57.4474	80.0763	1	3
112.161	11.4578	1.51832	50.9459	100.024	1	3
128.358	13.8061	1.8295	63.0045	93.5223	1	3
76.8828	8.17969	1.08393	53.5605	135.691	1	3
92.8973	10.1174	1.3407	57.1551	92.0044	1	3
93.1021	8.6979	1.1526	44.3972	178.986	1	3
134.575	16.1927	2.14576	70.2674	82.564	1	3
127.493	18.7748	2.48792	58.3243	87.7523	1	3
107.473	15.5674	2.0629	57.9812	76.3215	1	3
79.4698	8.98246	1.1903	59.5107	112.898	1	3
103.257	23.3272	3.09119	54.473	78.9064	1	3
84.4661	23.3812	3.09834	46.7141	59.9105	1	3
84.3726	24.4543	3.24054	55.5693	47.0578	1	3
82.2914	29.7193	3.93822	44.8422	40.8736	1	3
98.8187	42.1233	5.58194	46.5646	47.6049	1	3
100.702	10.3871	1.37644	52.3919	131.899	1	3
63.6458	23.2204	3.07703	54.9401	56.9873	1	3
96.2741	29.8824	3.95984	54.587	53.2238	1	3
89.5611	40.5436	5.37261	48.1421	42.9007	1	3
119.356	17.4133	2.30751	62.7496	82.4716	1	3
60.0457	26.0689	3.4545	56.8084	66.3871	1	3
107.303	35.7828	4.74173	49.0441	41.8214	1	3
83.446	11.2324	1.48845	56.103	83.4331	1	3
85.5441	15.4257	2.04412	42.6461	66.9904	1	3
123.675	18.3924	2.43726	42.8987	69.974	1	3
62.4238	13.0586	1.73045	47.5762	79.3629	1	3
76.3614	27.8018	3.68413	39.7097	63.8621	1	3
99.3354	31.0737	4.1177	68.3425	66.1149	1	3
78.4549	25.1582	3.33383	43.7648	56.9873	1	3
71.7586	43.8932	5.81648	43.4883	34.1391	1	3
92.7069	20.6589	2.73759	54.9951	70.5711	1	3
72.5345	33.0031	4.37338	33.9342	29.3347	1	3
128.466	40.1983	5.32685	39.3994	39.224	1	3
62.7125	9.81257	1.30031	48.695	80.9293	1	3
112.572	22.0574	2.92292	38.3259	50.4542	1	3
86.1089	18.5243	2.45474	47.426	76.2154	1	3
103.287	19.6577	2.60493	39.0625	62.786	1	3
89.3038	27.3433	3.62338	35.5108	44.5296	1	3
77.6551	34.9614	4.63288	35.7177	33.085	1	3
110.79	36.0223	4.77347	39.0908	41.5482	1	3
103.771	55.111	7.30299	45.7695	30.6472	1	3
83.0188	29.7627	3.94399	50.3925	66.7457	1	3
114.755	23.7226	3.14358	49.0534	50.413	1	3
80.4586	32.7272	4.33682	47.4512	62.5572	1	3
84.6333	31.2842	4.14561	40.5317	42.2709	1	3
106.606	40.2495	5.33363	62.823	54.6639	1	3
134.191	32.2634	4.27536	41.7079	69.9186	1	3
94.7543	39.3174	5.21012	46.0478	60.8229	1	3
59.6883	25.5153	3.38114	35.3027	31.7495	1	3
66.2887	24.2912	3.21893	40.7268	46.788	1	3
72.0624	44.6181	5.91254	44.448	30.2963	1	3
110.518	21.9444	2.90795	45.9532	75.5076	1	3
134.042	32.9633	4.3681	42.0537	59.0436	1	3
75.9063	19.7687	2.61963	63.8155	57.9408	1	3
23.8915	34.6134	4.58677	50.8639	117.984	0	3
21.8273	39.7083	5.26191	49.3454	60.8837	0	3
25.9325	36.5502	4.84343	50.8591	103.396	0	3
22.9774	40.3584	5.34806	54.2945	48.1841	0	3
24.7035	31.8701	4.22325	45.855	24.1807	0	3
29.1966	42.0314	5.56976	66.0852	87.7602	0	3
26.0642	26.4955	3.51103	52.9125	113.105	0	3
28.1127	31.5958	4.1869	64.3124	68.9622	0	3
22.3691	24.2145	3.20877	45.9369	124.07	0	3
21.6136	9.51845	1.26133	65.4466	82.3537	0	3
23.4484	44.752	5.93028	51	31.5468	0	3
23.6672	18.0983	2.39829	52.1014	105.293	0	3
29.843	22.4916	2.98046	63.9743	52.6473	0	3
30.6933	32.3717	4.28972	69.2249	80.2083	0	3
26.287	20.7683	2.75209	58.0784	122.583	0	3
28.9216	23.9407	3.17249	71.2409	67.1463	0	3
23.1898	47.696	6.32039	56.42	29.6483	0	3
26.7679	40.575	5.37676	58.87	44.4374	0	3
20.4888	8.35075	1.10659	73.1231	106.589	0	3
26.1018	17.1521	2.2729	55.438	115.314	0	3
22.3292	9.74847	1.29181	65.91	87.5122	0	3
23.5923	14.5486	1.9279	49.518	78.9159	0	3
31.712	30.6709	4.06433	69.4383	57.9169	0	3
28.2257	13.3824	1.77336	49.6485	85.7582	0	3
30.0385	21.2367	2.81416	56.1064	73.0486	0	3
26.5259	15.9167	2.10919	58.4138	100.321	0	3
25.127	7.91005	1.04819	63.5317	109.607	0	3
29.4264	11.9966	1.58971	58.5897	121.134	0	3
28.7766	19.0864	2.52922	66.3404	54.7495	0	3
36.1291	37.6258	4.98596	81.7155	48.9753	0	3
26.0076	17.4949	2.31833	67.7722	65.824	0	3
22.8642	26.6373	3.52983	54.2948	40.8708	0	3
27.5836	16.4249	2.17654	62.5453	88.081	0	3
29.7481	14.1018	1.86869	60.4975	107.221	0	3
21.6932	51.6562	6.84519	52.223	18.5791	0	3
28.9468	11.6638	1.54563	57.5877	135.115	0	3
29.0055	31.0023	4.10825	59.4152	38.7436	0	3
26.1024	21.0354	2.78749	58.2183	58.9447	0	3
26.7244	37.8205	5.01175	61.7495	31.1467	0	3
30.5997	14.4628	1.91653	57.7901	124.576	0	3
32.073	15.6491	2.07373	69.4424	88.2979	0	3
28.4558	39.2791	5.20504	66.2535	39.4532	0	3
25.0918	14.8883	1.97292	78.1663	29.7223	0	3
23.5654	10.1942	1.35088	53.5019	110.533	0	3
31.7185	22.7283	3.01183	65.4724	58.6636	0	3
27.4522	16.6813	2.21051	54.4583	74.7111	0	3
24.1786	43.9906	5.82938	57.1316	12.5846	0	3
31.4382	12.4624	1.65144	62.6505	121.594	0	3
29.3495	43.5758	5.77441	65.5838	32.1727	0	3
27.7809	9.50591	1.25967	57.4801	103.07	0	3
27.697	5.93308	0.786218	73.971	133.614	0	3
26.2876	35.745	4.73672	60.1512	23.5289	0	3
25.8155	15.0809	1.99843	55.7686	57.732	0	3
26.9976	15.5971	2.06684	56.8697	67.5779	0	3
22.9518	6.9	0.914348	43.6107	142.797	0	3
31.5141	16.5455	2.19252	65.0063	62.8697	0	3
25.8564	18.2872	2.42331	51.3248	37.2762	0	3
30.9894	7.03642	0.932426	81.475	120.987	0	3
28.778	11.7328	1.55476	60.806	77.4155	0	3
32.2066	12.0185	1.59262	63.1358	112.545	0	3
31.2535	13.8357	1.83342	72.8934	48.1697	0	3
33.4503	20.4221	2.70622	70.7148	70.1439	0	3
27.3991	15.2821	2.0251	67.383	62.7685	0	3
30.0719	7.45843	0.988348	54.8629	152.161	0	3
26.4039	7.96305	1.05522	55.2512	116.024	0	3
25.4773	10.539	1.39657	55.9764	94.9647	0	3
30.0623	15.1665	2.00977	73.7726	33.043	0	3
29.8612	19.9785	2.64743	59.5167	48.1049	0	3
31.8651	11.0581	1.46536	64.2533	73.9185	0	3
27.4571	8.499	1.12624	49.2854	152.783	0	3
32.6681	8.20201	1.08688	75.0302	102.49	0	3
38.2688	10.4505	1.38483	74.8093	110.593	0	3
27.7503	8.19659	1.08616	48.5306	146.948	0	3
30.5288	8.67548	1.14962	72.8534	63.7217	0	3
27.5522	48.7183	6.45587	57.6637	20.6982	0	3
28.6272	9.28795	1.23079	62.442	84.8673	0	3
33.4078	16.5899	2.19839	67.5415	65.076	0	3
31.2357	8.08685	1.07162	78.6452	80.1434	0	3
31.0259	9.72845	1.28916	73.2484	98.9236	0	3
19.9077	14.1858	1.87983	65.8268	17.5652	0	3
29.5679	8.07443	1.06998	53.4652	131.508	0	3
33.4387	15.454	2.04788	63.1418	67.111	0	3
38.7769	10.7043	1.41847	81.9724	51.9321	0	3
52.87	15.122	2.00388	101.804	36.0031	0	3
38.9668	14.1416	1.87396	84.4403	53.8726	0	3
30.815	7.10987	0.94216	57.146	153.014	0	3
28.2238	11.228	1.48787	61.2155	36.7971	0	3
30.549	9.73084	1.28947	73.5882	104.181	0	3
29.7663	14.3876	1.90656	72.3195	44.2497	0	3
36.1829	21.9978	2.91502	69.4424	57.6408	0	3
31.2614	8.43176	1.11733	71.6146	115.144	0	3
28.2536	7.45214	0.987514	40.6456	183.438	0	3
35.7692	13.4696	1.78492	72.4271	79.6595	0	3
31.2431	19.6367	2.60214	67.6927	59.5786	0	3
29.6144	6.93301	0.918722	48.835	196.18	0	3
32.2702	9.41504	1.24763	64.6762	143.093	0	3
27.0795	6.72273	0.890857	50.8909	155.38	0	3
28.2339	41.1042	5.44689	64.0847	38.6136	0	3
28.4756	8.32916	1.10373	43.4769	173.953	0	3
28.9784	21.8982	2.90183	64.7939	56.9112	0	3
34.3647	10.5403	1.39674	70.0036	100.018	0	3
32.763	8.86639	1.17492	60.2724	158.558	0	3
33.6485	8.31717	1.10214	90.3737	118.527	0	3
24.2891	31.6942	4.19993	58.5574	51.2092	0	3
35.6254	20.4113	2.70479	70.263	70.2781	0	3
25.1801	36.1206	4.78649	59.1688	45.0445	0	3
29.4635	8.44752	1.11942	49.8615	154.264	0	3
30.3108	6.82257	0.904088	58.997	139.687	0	3
26.4083	6.65434	0.881795	46.4309	191.361	0	3
32.1182	7.85676	1.04113	52.932	195.798	0	3
32.8852	8.94261	1.18502	59.0717	167.761	0	3
32.6442	24.2884	3.21855	67.6257	65.2171	0	3
35.3492	6.8243	0.904316	77.2863	130.185	0	3
25.921	6.71324	0.889599	35.6066	204.808	0	3
31.5716	7.09704	0.940459	63.5858	147.38	0	3
31.6188	14.3919	1.90713	58.9863	75.3612	0	3
34.5699	10.331	1.369	83.9274	83.5494	0	3
32.8083	14.3325	1.89926	66.7743	89.5253	0	3
31.4765	9.2749	1.22906	62.4834	108.17	0	3
24.2381	15.7685	2.08956	64.1041	62.424	0	3
35.2604	7.55472	1.00111	62.7283	134.321	0	3
31.1836	14.7959	1.96067	61.2442	86.5031	0	3
27.0409	6.62451	0.877842	58.0953	148.583	0	3
32.1041	8.73438	1.15743	67.8164	109.877	0	3
34.8074	9.14286	1.21156	66.4004	131.549	0	3
32.3605	7.34156	0.972861	57.7318	157.262	0	3
30.2342	6.81622	0.903246	59.3622	141.025	0	3
27.7939	7.17376	0.950626	48.0835	223.934	0	3
29.2168	7.45133	0.987407	62.5774	124.055	0	3
29.166	6.10042	0.808392	52.1241	153.837	0	3
36.9373	8.76176	1.16106	68.6677	133.386	0	3
26.4591	13.9086	1.84309	60.6227	89.1974	0	3
30.3955	8.9803	1.19002	73.1424	117.365	0	3
30.7903	8.36445	1.10841	43.5384	194.495	0	3
26.7343	6.31965	0.837444	48.0259	243.694	0	3
35.6564	6.34597	0.840932	52.8081	163.434	0	3
34.5353	6.4391	0.853273	56.5208	151.407	0	3
17.896	7.57261	1.00348	46.4026	97.696	0	3
21.6258	9.38833	1.24409	57.6781	98.3447	0	3
25.5371	5.70524	0.756026	40.9148	184.456	0	3
36.6232	9.61212	1.27374	76.6919	129.086	0	3
25.9899	7.2166	0.956302	40.1741	257.299	0	3
25.9066	6.34337	0.840587	49.2018	170.072	0	3
32.831	6.55399	0.868497	48.1819	193.223	0	3
30.9945	6.52641	0.864843	44.6903	200.713	0	3
32.9888	6.86236	0.90936	56.3975	158.267	0	3
19.6064	28.7695	3.81237	44.2163	97.9253	0	3
26.6021	51.1883	6.78318	67.3552	73.6412	0	3
26.8557	18.6127	2.46644	49.362	95.7817	0	3
24.938	45.2417	5.99516	57.6153	33.029	0	3
23.4211	39.1643	5.18982	51.7432	105.135	0	3
22.7259	59.9659	7.94634	56.5497	19.7815	0	3
29.3339	39.5429	5.23999	62.9179	40.0941	0	3
21.3241	70.1676	9.29821	57.4986	13.4719	0	3
21.5224	16.4059	2.17401	43.4166	127.567	0	3
26.7057	15.9743	2.11682	51.2738	67.9702	0	3
27.2838	47.0366	6.23302	54.0389	24.9037	0	3
24.6496	24.7485	3.27953	60.1513	41.4814	0	3
27.1189	15.7615	2.08862	59.5934	96.5241	0	3
27.3502	59.6886	7.90958	62.6835	16.8909	0	3
24.746	43.8061	5.80493	58.2743	27.8924	0	3
24.3515	52.173	6.91366	50.7773	16.1956	0	3
30.0575	22.8898	3.03323	61.9437	50.7284	0	3
25.9464	6.41405	0.849953	57.8152	94.6764	0	3
24.726	12.5312	1.66056	59.6012	81.3965	0	3
24.3214	31.1204	4.12389	56.9369	32.3447	0	3
25.2211	8.1541	1.08053	69.067	97.8113	0	3
28.7397	29.3629	3.89101	54.8668	35.4791	0	3
27.2058	8.22937	1.09051	51.097	134.188	0	3
25.0865	46.9481	6.22129	59.9865	21.8792	0	3
28.4585	13.6462	1.80832	80.8775	81.4561	0	3
33.9768	18.0268	2.38881	67.9625	66.1682	0	3
32.2959	17.018	2.25513	69.8473	56.241	0	3
31.7691	7.81625	1.03577	68.7267	127.202	0	3
25.2513	7.68821	1.0188	48.641	141.775	0	3
27.1173	8.34441	1.10575	61.3786	76.0415	0	3
27.5327	11.767	1.5593	57.9188	89.9504	0	3
28.6053	12.0554	1.59752	62.5765	83.5723	0	3
29.6652	17.1131	2.26773	63.0133	69.3508	0	3
27.2522	8.45391	1.12026	56.2348	120.69	0	3
35.9197	7.57798	1.00419	74.6972	87.1634	0	3
33.0969	7.05357	0.934699	68.2934	94.799	0	3
27.5492	9.09121	1.20471	55.1345	120.981	0	3
27.6225	8.13353	1.07781	47.1556	142.574	0	3
25.5927	7.06759	0.936556	42.9532	134.3	0	3
26.4738	26.9425	3.57026	64.2023	45.9503	0	3
31.5874	7.81102	1.03507	64.1559	121.37	0	3
30.421	15.7455	2.0865	60.4615	72.1089	0	3
34.491	15.3989	2.04058	73.3141	85	0	3
22.6772	51.2359	6.78948	51.6217	34.3046	0	3
23.5733	11.2684	1.49323	57.5841	48.5641	0	3
25.5271	6.73917	0.893036	36.7301	197.927	0	3
29.7133	8.41126	1.11461	53.0102	152.87	0	3
29.5778	8.78491	1.16413	65.6437	113.057	0	3
23.7143	7.86873	1.04272	55.5174	62.5101	0	3
31.647	11.5173	1.52621	65.1913	95.7726	0	3
26.3233	24.1328	3.19793	58.5396	53.9787	0	3
34.1927	7.55505	1.00115	71.039	139.783	0	3
24.8423	6.98592	0.925733	34.6535	215.304	0	3
26.5867	5.47194	0.72511	51.4184	166.849	0	3
30.5976	6.65753	0.882218	49.9195	175.985	0	3
30.814	9.62128	1.27496	68.6558	104.342	0	3
30.1361	6.9732	0.924048	62.8474	138.345	0	3
28.1146	8.10669	1.07425	41.6083	217.178	0	3
30.3324	5.55496	0.736111	62.5389	165.253	0	3
30.0881	7.45688	0.988143	39.4312	229.591	0	3
26.3012	17.8313	2.3629	52.66	91.2347	0	3
28.8435	5.57467	0.738723	45.8723	178.767	0	3
25.9363	8.67197	1.14916	40.1146	215.504	0	3
21.8701	80.2147	10.6296	50.0532	14.2962	0	3
19.8423	24.0373	3.18529	41.5685	122.31	0	3
22.6397	34.8902	4.62345	54.4115	42.3419	0	3
21.7255	38.7741	5.13812	53.7025	70.684	0	3
20.4574	14.0155	1.85725	72.0568	107.831	0	3
24.6227	10.0851	1.33642	74.9021	56.4236	0	3
23.4526	24.6125	3.2615	49.9444	67.3037	0	3
18.4243	51.0546	6.76546	44.6053	8.418	0	3
24.2439	21.7036	2.87603	52.1004	95.6996	0	3
19.6021	34.1938	4.53116	54.3521	33.4809	0	3
25.4272	21.3829	2.83354	50.3307	79.3898	0	3
21.1005	33.8219	4.48189	57.5734	14.9058	0	3
26.0164	13.4415	1.78119	56.8138	105.583	0	3
20.6047	7.53403	0.998366	60.6073	117.316	0	3
25.3621	28.9595	3.83755	56.8578	32.9379	0	3
22.0288	13.286	1.76058	47.7225	118.451	0	3
29.7064	28.6061	3.79071	69.7746	51.242	0	3
25.288	14.292	1.89389	55.876	99.6101	0	3
24.2887	9.77763	1.29568	55.857	116.78	0	3
23.0615	14.385	1.90621	49.918	70.9583	0	3
26.3106	9.50049	1.25895	52.8477	112.888	0	3
30.0011	11.4261	1.51413	68.9511	41.2691	0	3
25.7155	8.55443	1.13358	65.1176	63.4717	0	3
23.9489	19.2887	2.55602	49.7182	52.7745	0	3
26.4931	8.7572	1.16045	50.4343	134.067	0	3
27.7116	14.9773	1.9847	55.0398	77.414	0	3
23.3691	9.058	1.20031	41.7821	146.041	0	3
31.412	13.617	1.80444	73.5342	60.9966	0	3
25.7367	9.35171	1.23923	54.0245	143.045	0	3
27.9172	28.8533	3.82347	57.716	47.6243	0	3
28.7508	10.7697	1.42713	62.4992	103.914	0	3
28.9809	15.4168	2.04295	58.8642	62.5637	0	3
26.3897	9.52708	1.26247	55.5225	90.4783	0	3
24.9392	33.2513	4.40627	51.518	33.6119	0	3
25.6851	7.57447	1.00372	50.4957	139.828	0	3
24.7075	7.79046	1.03235	56.0145	111.351	0	3
30.4948	10.462	1.38636	72.6448	92.2923	0	3
29.0224	10.6066	1.40553	56.1716	148.353	0	3
23.8249	7.53672	0.998723	50.7571	108.121	0	3
25.2752	8.16634	1.08216	50.2832	124.858	0	3
23.204	7.36455	0.975908	39.3344	173.293	0	3
30.2243	8.07757	1.07039	56.0809	149.804	0	3
28.3895	8.76105	1.16096	45.8756	168.908	0	3
32.0451	7.80784	1.03465	61.1078	120.347	0	3
26.7321	15.6707	2.07659	53.4884	76.5272	0	3
33.3681	7.57824	1.00422	64.3964	117.323	0	3
27.5592	7.88161	1.04443	54.1385	129.585	0	3
25.9787	11.8369	1.56856	55.7234	84.1423	0	3
25.2366	5.83441	0.773142	68.0817	96.1677	0	3
27.067	7.99377	1.05929	43.9393	159.878	0	3
27.1259	6.47094	0.857492	50.5533	139.89	0	3
27.0739	10.4387	1.38328	38.9483	198.022	0	3
26.1509	7.88679	1.04511	38.5358	234.686	0	3
30.6775	9.6213	1.27496	42.9852	203.955	0	3
28.1505	7.0076	0.928607	40.6869	184.744	0	3
25.204	10.8556	1.43852	57.4982	90.1462	0	3
26.5103	6.59882	0.874438	46.5914	169.641	0	3
26.9299	12.7076	1.68393	40.8505	192.833	0	3
30.2503	6.57829	0.871717	51.0846	155.564	0	3
26.4619	8.24433	1.09249	36.7076	207.82	0	3
21.4571	37.33	4.94676	46.0611	57.825	0	3
21.0354	74.2918	9.84472	46.1147	12.8302	0	3
20.6369	22.8646	3.02988	42.9957	97.561	0	3
23.2822	45.9331	6.08678	51.7106	25.9494	0	3
21.7476	14.8269	1.96477	44.2217	120.568	0	3
23.8107	20.674	2.7396	51.265	87.5835	0	3
23.8738	23.8023	3.15415	53.47	61.5813	0	3
24.0557	17.2508	2.28598	53.4662	97.4193	0	3
23.0789	9.89943	1.31182	48.7291	132.312	0	3
23.481	13.8294	1.8326	46.1487	52.4306	0	3
21.9609	75.3848	9.98956	46.0772	6.53119	0	3
22.171	9.34896	1.23887	45.468	129.012	0	3
29.1504	16.1372	2.13841	61.2406	67.2521	0	3
25.2729	32.0063	4.24129	58.1733	43.9968	0	3
21.659	8.44615	1.11924	69.1615	82.508	0	3
22.4671	7.58818	1.00554	50.4874	134.157	0	3
20.745	53.2804	7.06041	43.9862	6.01521	0	3
23.4729	10.3364	1.36972	51.0129	86.2937	0	3
21.7699	9.04572	1.19869	45.0664	126.309	0	3
24.8202	7.41783	0.982969	61.0339	141.673	0	3
21.3053	59.6923	7.91007	45.192	21.9109	0	3
21.6747	7.63733	1.01206	48.624	93.944	0	3
22.753	12.9664	1.71823	57.168	69.0334	0	3
21.2005	64.6646	8.56898	45.7625	16.1527	0	3
29.199	11.4669	1.51953	61.2029	93.2815	0	3
21.9813	31.3973	4.16059	48.2813	33.4585	0	3
30.2752	11.1651	1.47954	75.0191	81.1924	0	3
26.6446	8.99853	1.19243	54.7988	99.2922	0	3
16.779	17.8801	2.36937	46.6498	4.80833	0	3
25.879	7.519	0.996375	45.178	158.144	0	3
26.8563	8.92608	1.18283	68.2957	69.2432	0	3
22.9972	8.99305	1.19171	50.4868	94.7826	0	3
28.0121	7.47782	0.990918	61.8125	82.4183	0	3
32.2393	10.6364	1.40947	60.1354	71.7915	0	3
22.9971	6.84792	0.907447	39.5882	156.286	0	3
19.3017	20.9336	2.774	52.444	7.48772	0	3
21.7213	17.2934	2.29162	63.5306	18.7525	0	3
25.7842	9.37068	1.24175	50.1845	123.141	0	3
29.2317	8.56805	1.13539	52.7683	131.188	0	3
22.9719	7.18072	0.951548	41.2631	166.861	0	3
27.4555	24.0312	3.18448	62.9251	57.4721	0	3
27.1533	8.46571	1.12183	44.9881	153.098	0	3
19.813	54.0205	7.15849	42.6408	15.2053	0	3
25.0701	9.98442	1.32308	47.8494	150.483	0	3
29.4969	8.66038	1.14762	60.6562	58.9417	0	3
25.2418	8.87697	1.17632	43.5522	180.312	0	3
26.1263	9.46212	1.25387	50.7702	144.162	0	3
23.9186	8.42986	1.11708	46.9389	172.54	0	3
29.3953	8.4315	1.11729	54.663	158.926	0	3
25.7676	6.49706	0.860953	38.3868	193.535	0	3
24.6607	6.08982	0.806988	44.7206	183.609	0	3
25.5675	17.8745	2.36862	51.0109	61.132	0	3
25.334	7.51025	0.995215	51.2848	142.875	0	3
28.9339	9.66201	1.28035	47.6658	159.302	0	3
23.2839	7.48453	0.991806	37.3383	203.633	0	3
18.0118	47.8201	6.33684	36.8805	36.6901	0	3
30.4273	8.33625	1.10467	68.1278	110.629	0	3
34.1108	8.86667	1.17496	67.7129	103.754	0	3
23.8943	6.26016	0.829561	39.6732	211.807	0	3
30.6809	13.0655	1.73136	67.4254	91.2347	0	3
27.6811	13.9315	1.84612	50.4601	160.376	0	3
24.258	7.23667	0.958962	41.1258	182.99	0	3
25.0172	7.60687	1.00802	54.0668	123.813	0	3
23.1607	11.1501	1.47755	56.0233	58.3583	0	3
29.8578	7.30734	0.968327	63.6972	170.866	0	3
17.9247	38.3441	5.08114	44.2634	53.3843	0	3
22.7984	23.8374	3.15879	45.5333	58.0046	0	3
30.6258	9.15968	1.21379	65.7943	126.816	0	3
26.2039	7.32338	0.970452	45.033	164.582	0	3
22.0273	5.42444	0.718815	27.9759	223.061	0	3
26.4768	10.9801	1.45502	39.3162	182.168	0	3
24.7517	7.30013	0.967372	36.9031	226.312	0	3
27.1545	10.0618	1.33333	42.6264	213.136	0	3
24.7196	7.76808	1.02938	42.965	161.328	0	3
29.6858	9.68391	1.28326	36.8487	205.169	0	3
23.3133	12.2613	1.6248	31.5253	194.562	0	3
25.1262	9.34087	1.2378	57.6271	92.3512	0	3
27.9815	6.74074	0.893244	50.5412	136.477	0	3
25.7232	36.9572	4.89735	38.8682	211.164	0	3
25.7031	10.4	1.37815	34.1908	222.454	0	3
24.6976	7.7881	1.03203	35.1167	232.527	0	3
24.9895	8.9749	1.1893	50.6632	128.863	0	3
26.8298	16.4683	2.18228	45.1596	221.519	0	3
25.0123	6.11934	0.8109	45.9156	161.509	0	3
24.2259	5.43444	0.720141	46.327	187.303	0	3
27.0938	6.98438	0.925529	51.1927	155.455	0	3
30.395	6.74821	0.894234	69.0084	146.981	0	3
25.8359	27.217	3.60664	34.2462	210.163	0	3
26.5252	8.18023	1.084	36.3527	240.524	0	3
21.3528	55.7325	7.38535	46.6088	63.9426	0	3
20.2946	24.1895	3.20545	40.3085	114.598	0	3
16.9041	40.3299	5.34429	38.8692	1.4425	0	3
24.0498	55.4365	7.34613	53.5587	34.9804	0	3
21.2708	23.8013	3.15401	45.7083	76.2828	0	3
19.7011	31.6388	4.1926	43.5903	59.1737	0	3
19.9255	44.3209	5.87315	53.2174	44.862	0	3
19.4649	6.1483	0.814737	50.7395	122.871	0	3
17.8159	71.5605	9.48279	40.5473	4.09414	0	3
24.8043	20.6227	2.7328	51.6794	79.3891	0	3
22.811	30.2459	4.00801	55.1798	46.5998	0	3
22.1527	31.4283	4.1647	52.0633	28.6106	0	3
19.0823	57.0386	7.55842	41.7326	11.9	0	3
26.6319	9.73077	1.28947	76.0027	82.8687	0	3
21.723	13.0955	1.73534	42.6745	105.95	0	3
22.8027	40.0998	5.31379	50.435	25.2288	0	3
24.9698	11.6667	1.546	47.9601	81.9851	0	3
21.23	8.95549	1.18673	45.4184	98.6691	0	3
21.5682	8.80138	1.16631	46.0794	109.41	0	3
25.0686	13.0496	1.72925	58.8069	74.5306	0	3
21.8599	21.4335	2.84024	44.369	44.1071	0	3
24.2174	9.1762	1.21598	51.6178	121.026	0	3
25.6347	8.67479	1.14953	51.361	74.5965	0	3
26.4481	9.15949	1.21376	53.9329	137.263	0	3
29.6741	9.84615	1.30476	58.6964	111.406	0	3
30.8798	10.4964	1.39092	66.238	109.891	0	3
22.8277	26.378	3.49547	47.3815	31.6985	0	3
26.9257	6.7302	0.891847	65.5446	128.196	0	3
21.5847	7.26578	0.962819	36.0598	177.656	0	3
27.9072	14.4304	1.91223	48.5432	141.587	0	3
20.8635	10.4511	1.38492	58.2719	37.7874	0	3
28.4671	11.77	1.55969	44.2914	152.933	0	3
18.2877	16.994	2.25194	63.163	41.7813	0	3
23.5565	7.11297	0.94257	33.2082	195.567	0	3
26.6645	9.65947	1.28002	55.7841	146.951	0	3
21.0778	7.56345	1.00227	47.9272	64.0393	0	3
21.1827	10.137	1.3433	49.3764	54.7094	0	3
28.0802	12.8981	1.70919	57.446	166.032	0	3
28.5119	10.2302	1.35564	54.1885	92.0572	0	3
21.5771	6.06857	0.804172	30.3514	214.66	0	3
25.6925	8.46531	1.12177	33.8245	209.79	0	3
25.0928	6.82805	0.904814	46.7602	174.174	0	3
26.9836	12.6223	1.67263	35.1551	197.931	0	3
26.5968	16.2736	2.15648	38.3968	187.316	0	3
27.0835	7.73782	1.02537	64.0626	88.2495	0	3
23.5021	4.76487	0.631413	38.6985	167.628	0	3
21.8539	8.06773	1.06909	32.8088	183.679	0	3
26.2805	9.38621	1.24381	54.0299	135.99	0	3
22.1528	5.73362	0.759787	56.6419	106.421	0	3
23.8689	6.64017	0.879917	37.4533	178.206	0	3
27.204	8.82623	1.1696	37.8094	233.759	0	3
25.7621	5.88206	0.779457	44.1288	149.091	0	3
24.6873	6.59761	0.874277	36.2789	187.377	0	3
25.7918	7.84387	1.03942	72.171	110.907	0	3
23.6296	10.7521	1.42481	31.9761	237.424	0	3
24.7832	9.98673	1.32338	35.1018	231.923	0	3
27.0664	8.5325	1.13068	36.4053	258.813	0	3
24.2573	5.88285	0.779561	57.0711	117.036	0	3
25.8	7.84444	1.0395	40.784	168.377	0	3
24.4711	9.74541	1.29141	33.2927	250.598	0	3
19.785	58.1947	7.71163	44.5241	56.7403	0	3
22.5901	23.5422	3.11967	48.0262	105.799	0	3
19.0832	19.0391	2.52295	44.3361	125.419	0	3
19.8433	38.3428	5.08096	41.086	26.1822	0	3
24.4247	45.2035	5.99011	52.5906	35.5117	0	3
19.0955	33.9821	4.50311	44.4791	71.9877	0	3
21.4702	52.4887	6.9555	56.1868	20.2464	0	3
20.5422	25.0295	3.31676	44.0683	31.4348	0	3
21.4241	14.8483	1.96761	43.1482	112.043	0	3
23.8735	16.372	2.16953	52.5744	90.2	0	3
23.1625	23.5938	3.12651	51.5812	49.9754	0	3
26.2122	12.1008	1.60353	49.9706	104.04	0	3
20.0937	10.2084	1.35276	42.473	94.6068	0	3
19.9334	10.4461	1.38425	42.7124	76.7723	0	3
22.4947	18.945	2.51049	49.2305	47.9448	0	3
24.7709	5.95418	0.789014	77.8028	116.608	0	3
21.8732	34.0971	4.51836	43.59	27.8883	0	3
24.0207	30.9526	4.10166	50.1615	35.5946	0	3
25.4106	13.7933	1.8278	62.8521	80.5398	0	3
28.6508	14.7966	1.96076	87.8655	68.1096	0	3
25.0058	11.4363	1.51548	47.7419	122.31	0	3
22.8552	52.7614	6.99163	48.4786	24.5649	0	3
19.2443	58.3659	7.73431	43.6287	14.7146	0	3
26.2534	18.7096	2.47929	52.2859	53.5271	0	3
25.032	6.00418	0.795639	65.8872	137.799	0	3
25.9321	11.9599	1.58486	54.4547	120.23	0	3
27.3978	9.90056	1.31197	54.0588	127.3	0	3
23.5125	12.5266	1.65996	45.8386	86.0207	0	3
22.3877	9.57753	1.26916	43.5158	104.234	0	3
25.7947	5.95437	0.789039	58.5894	165.089	0	3
24.521	8.46507	1.12174	46.9341	157.987	0	3
22.931	7.34975	0.973947	35.75	170.648	0	3
24.3929	10.5572	1.39898	51.8815	129.211	0	3
29.603	9.79282	1.29769	59.4178	108.652	0	3
28.5321	11.6176	1.5395	50.4773	146.873	0	3
34.2386	11.0964	1.47044	54.1142	140.657	0	3
23.5295	9.15295	1.2129	36.9733	183.677	0	3
23.8339	8.53929	1.13158	36.5714	167.322	0	3
21.485	6.03542	0.799779	52	101.497	0	3
27.8854	7.02351	0.930715	62.8369	127.429	0	3
24.2782	12.7091	1.68414	53.1473	79.8312	0	3
25.0764	17.222	2.28217	48.4819	178.296	0	3
23.89	7.64593	1.0132	49.4067	153.912	0	3
30.945	7.94067	1.05225	63.3589	123.283	0	3
25.8981	6.87017	0.910396	62.2264	133.198	0	3
22.9431	5.36911	0.711483	45.1203	103.28	0	3
24.9422	7.98925	1.05869	49.4046	150.504	0	3
25.0182	8.48107	1.12386	52.0519	171.771	0	3
26.517	10.8571	1.43873	50.1069	92.343	0	3
20.1293	17.9569	2.37955	53.5079	81.8828	0	3
22.4557	11.0683	1.4667	56.214	99.0562	0	3
27.1073	15.9736	2.11673	46.4653	214.489	0	3
26.5657	7.17424	0.950689	65.9091	103.157	0	3
25.9298	8.92259	1.18237	45.7957	166.715	0	3
26.4757	10.3595	1.37278	57.7554	112.446	0	3
23.536	12.3554	1.63726	39.2587	233.181	0	3
25.5852	6.75872	0.895627	49.1196	125.839	0	3
23.7176	5.96947	0.791039	47.729	143.572	0	3
27.047	8.85043	1.17281	51.6239	162.416	0	3
25.6726	7.52809	0.997579	38.6758	174.22	0	3
30.7266	6.28608	0.832995	61.5013	154.519	0	3
19.4714	76.3242	10.114	42.0805	32.4143	0	3
20.153	50.4316	6.6829	43.8682	45.0651	0	3
20.2886	34.3768	4.55541	46.2224	90.5665	0	3
20.0992	30.5987	4.05477	47.4635	85.4868	0	3
21.1068	17.6752	2.34221	42.2271	108.784	0	3
19.5913	12.8621	1.70441	37.5764	121.312	0	3
22.2583	27.3215	3.62048	47.7819	73.9732	0	3
22.4221	6.32338	0.837937	68.4883	112.258	0	3
20.9341	10.4991	1.39128	41.662	99.6101	0	3
20.9815	53.97	7.1518	43.067	17.0713	0	3
21.6319	12.3107	1.63134	49.4648	106.748	0	3
25.0791	9.73056	1.28944	46.7721	128.076	0	3
25.7815	9.35657	1.23988	70.1997	127.943	0	3
21.8062	6.56395	0.869817	45.3992	119.615	0	3
23.696	7.44383	0.986414	40.3205	145.495	0	3
21.2562	10.9926	1.45668	51.8621	83.2361	0	3
21.3194	5.37115	0.711753	48.7608	154.363	0	3
22.2384	5.94453	0.787735	45.8741	92.2929	0	3
22.9584	12.5077	1.65744	56.9595	85.8862	0	3
25.474	10.1782	1.34876	46.052	106.542	0	3
25.2955	6.85227	0.908024	64.6439	123.574	0	3
22.3596	7.93258	1.05118	47.3034	122.166	0	3
28.3761	11.009	1.45884	58.1214	99.5521	0	3
20.3609	6.89348	0.913485	31.312	167.38	0	3
22.8169	7.15418	0.94803	44.6627	107.795	0	3
23.395	8.98408	1.19052	42.3801	125.331	0	3
25.8157	10.881	1.44189	43.5617	155.837	0	3
26.8588	13.1882	1.74763	53.6588	115.396	0	3
20.019	80.9396	10.7256	48.9085	7.00928	0	3
29.6487	15.9474	2.11326	65.491	111.792	0	3
29.9137	9.07188	1.20215	62.1198	123.574	0	3
26.3251	19.688	2.60895	50.8805	176.946	0	3
27.8684	8.82051	1.16884	59.4256	152.66	0	3
30.4042	9.37063	1.24174	55.1441	99.8773	0	3
22.8904	8.16517	1.082	34.0811	191.613	0	3
24.5136	10.3981	1.3779	42.087	175.44	0	3
26.7531	8.6473	1.14589	39.3382	147.967	0	3
25.1374	10.1679	1.3474	44.7405	184.897	0	3
19.8306	8.04706	1.06635	30.6918	205.471	0	3
24.8223	8.34242	1.10549	50.4988	110.754	0	3
22.6947	18.8547	2.49852	47.0079	68.9999	0	3
23.7349	8.07651	1.07025	32.6495	208.52	0	3
22.1832	40.854	5.41374	57.1988	51.0408	0	3
21.3668	6.55779	0.869	31.5653	216.488	0	3
24.4354	7.0343	0.932145	58.2005	143.108	0	3
26.0093	6.34264	0.840491	49.3147	137.772	0	3
22.5461	9.37731	1.24263	37.8699	166.129	0	3
19.7197	25.6105	3.39375	50.5012	79.7784	0	3
28.1346	6.10905	0.809536	61.4803	127.068	0	3
28.2587	12.9045	1.71003	45.7762	138.827	0	3
23.8403	12.2471	1.62291	50.7541	114.681	0	3
22.6128	7.36789	0.97635	37.9726	184.926	0	3
26.5984	10.8385	1.43625	47.9852	130.145	0	3
25.234	11.3729	1.50707	44.0842	157.433	0	3
28.7944	14.5785	1.93186	52.6748	114.671	0	3
24.0843	8.42912	1.11698	34.516	180.3	0	3
24.4435	12.9619	1.71764	41.2231	177.285	0	3
18.4796	35.2784	4.67489	38.7005	91.1967	0	3
23.58	31.8864	4.2254	57.1376	100.53	0	3
19.3762	61.4375	8.14134	40.8101	34.6683	0	3
18.9777	45.8352	6.07382	41.4637	55.9194	0	3
20.9552	47.6456	6.31372	48.5033	43.7069	0	3
24.2104	35.7748	4.74066	50.6139	49.423	0	3
19.4216	19.7059	2.61131	39.1287	120.091	0	3
20.6426	16.4496	2.1798	42.6027	102.035	0	3
18.8942	26.3764	3.49525	39.3998	66.6435	0	3
21.9484	9.20819	1.22022	62.5231	86.79	0	3
19.098	40.6367	5.38495	41.4463	30.053	0	3
21.6393	33.3498	4.41932	47.7445	44.6644	0	3
20.7667	57.3764	7.60319	46.8818	21.6241	0	3
19.6055	29.154	3.86332	53.73	87.8102	0	3
17.1331	34.452	4.56538	38.9628	39.4312	0	3
19.5288	12.9637	1.71787	40.4674	108.516	0	3
20.2647	15.5728	2.06362	46.6276	69.7	0	3
21.5156	83.8661	11.1135	48.1014	20.1978	0	3
26.2549	11.3516	1.50424	52.9834	115.278	0	3
22.5037	46.75	6.19504	53.8955	55.3146	0	3
25.2642	15.5189	2.05647	57.3892	72.3657	0	3
22.1436	11.1651	1.47953	47.8992	71.6311	0	3
26.0659	14.2731	1.89139	52.0861	101.085	0	3
22.1034	7.62069	1.00985	47.215	117.521	0	3
26.2927	12.1018	1.60366	69.8445	132.466	0	3
26.1497	41.8808	5.5498	66.5262	46.1462	0	3
23.3444	13.2017	1.74941	47.0021	71.2679	0	3
22.1538	6.96761	0.923308	49.5729	99.0865	0	3
22.4	10.7591	1.42573	47.2439	149.527	0	3
23.7359	5.95198	0.788722	55.1554	132.95	0	3
25.2728	23.358	3.09527	56.3197	123.843	0	3
26.0863	7.77108	1.02978	52.5643	67.8042	0	3
25.6241	8.48872	1.12488	47.5075	124.59	0	3
25.7358	10.1049	1.33905	48.9531	137.345	0	3
24.4107	9.17857	1.21629	38.9256	205.076	0	3
29.351	25.6019	3.39261	60.1461	162.264	0	3
23.753	9.24337	1.22488	47.2325	110.115	0	3
22.9671	5.27273	0.698711	49.0387	140.014	0	3
29.2277	12.0396	1.59542	58.2115	101.218	0	3
25.2104	15.2679	2.02322	50.4716	162.103	0	3
23.8342	10.3038	1.3654	43.7816	135.968	0	3
17.1378	24.531	3.2507	37.6347	111.678	0	3
18.7595	34.5821	4.58262	40.3114	77.756	0	3
23.3386	29.4607	3.90397	45.5864	68.3468	0	3
18.5556	18.7718	2.48753	41.0465	114.649	0	3
22.9428	51.1161	6.77361	52.5501	46.3124	0	3
23.4042	29.2444	3.8753	57.115	93.5785	0	3
21.6082	32.2998	4.28019	46.1107	78.0083	0	3
19.9061	15.8519	2.1006	42.0899	133.136	0	3
20.0865	12.9398	1.71471	42.9624	120.736	0	3
17.5453	9.78601	1.29679	37.2881	118.146	0	3
19.8642	16.5993	2.19965	42.6424	89.5569	0	3
19.9611	7.07377	0.937375	40.6721	137.521	0	3
20.0787	12.7705	1.69228	41.6449	88.2514	0	3
19.0958	8.48958	1.12499	36.1208	141.051	0	3
20.7171	6.88864	0.912843	40.2717	142.324	0	3
26.5582	11.7909	1.56247	43.9862	140.387	0	3
25.4022	17.8567	2.36627	57.5886	76.8806	0	3
27.2269	13.241	1.75462	55.5775	104.46	0	3
30.4389	12.5327	1.66076	54.4707	124.908	0	3
24.2859	11.7699	1.55968	50.3473	87.2873	0	3
21.3763	33.1419	4.39178	43.7312	88.7166	0	3
20.1859	42.2308	5.59618	45.297	70.4424	0	3
20.8182	32.0574	4.24806	45.2081	89.5853	0	3
26.2208	18.294	2.42421	63.1683	53.1586	0	3
31.4302	18.8992	2.50442	76.7804	67.344	0	3
27.5639	14.2083	1.88281	50.8361	83.3694	0	3
