# Supplementary material for: The pattern of nodal morphogen signaling is shaped by co-receptor expression
Source: eLife. 2021 May 26;10:e54894. doi: 10.7554/eLife.54894 (PMC8266389; doi:10.7554/eLife.54894)
Supplement: Figure 1—source data 2. — The quantified fluorescence intensities are organized in this table. Each row corresponds to an individual nucleus. The following characteristics were quantified: average GFP pixel intensity (‘GFP’), average pixel intensity for α-pSmad2 staining (‘pSmad2Raw’), α-pSmad2 staining intensity normalized to background (‘pSmad2 Normalized’), average DAPI pixel intensity (‘DAPI’), distance from the embryonic margin in μm (‘marginDist’), GFP staining status (‘GFP_Flag’, 0 denotes a cell host nucleus, one denotes a sensor cell nucleus), and embryo replicate number (‘Embryo Number’). We note that normalized α-pSmad2 staining was used to generate the figure panel. [file elife-54894-fig1-data2.xlsx]

## Sheet: Sheet1
GFP	pSmad2Raw	pSmad2Normalized	DAPI	marginDist	GFP_Flag	EmbryoNumber
73.8023	27.4223	6.51231	48.3225	24.0464	1	1
74.579	19.2725	4.57688	57.1866	40.3957	1	1
81.6071	16.8147	3.99321	40.7812	30.001	1	1
84.1607	21.1786	5.02954	46.4802	34.09	1	1
92.69	13.0786	3.10594	48.4127	51.8954	1	1
80.9236	9.98696	2.37173	45.2719	63.4635	1	1
72.3498	10.978	2.60708	52.3695	54.8824	1	1
76.9564	25.8972	6.15013	49.6838	48.2189	1	1
67.0712	13.5904	3.22748	41.3212	39.3534	1	1
96.6529	30.4819	7.23892	41.5793	20.9176	1	1
107.521	18.5011	4.39369	46.6615	43.9074	1	1
71.8045	17.0902	4.05863	43.1053	60.3804	1	1
103.99	54.6682	12.9827	59.0285	33.5706	1	1
71.5103	47.0505	11.1737	46.2336	28.5782	1	1
73.3224	36.0859	8.56977	37.9671	44.9006	1	1
72.7175	11.2743	2.67746	44.0492	70.1101	1	1
73.7335	4.85479	1.15293	31.6377	116.758	1	1
50.1378	11.2304	2.66703	39.2767	84.7883	1	1
102.588	21.7191	5.15791	34.368	35.3665	1	1
34.3328	5.38602	1.27909	34.8906	17.7908	1	1
58.31	7.81261	1.85536	47.7356	33.1217	1	1
18.669	6.08102	1.44414	36.9977	223.04	0	1
18.2944	6.94948	1.65038	35.885	214.54	0	1
21.1556	5.52797	1.3128	48.6888	55.42	0	1
23.1787	6.15399	1.46147	52.4772	77.18	0	1
16.2447	4.83814	1.14897	28.0828	234.26	0	1
23.4972	5.93088	1.40848	50.8172	38.833	0	1
22.9397	6.43503	1.52821	55.6234	26.9974	0	1
19.2752	5.50459	1.30724	38.792	84.3755	0	1
18.4828	6.34708	1.50732	42.4948	107.505	0	1
23.4867	5.78645	1.37418	52.6468	64.9222	0	1
18.9765	4.70496	1.11735	55.9843	54.74	0	1
16.0985	5.75568	1.36687	33.8958	155.612	0	1
16.904	5.35191	1.27099	35.4365	217.129	0	1
24.6607	5.6369	1.33867	51.502	37.4015	0	1
21.8995	5.74623	1.36463	48.098	90.78	0	1
18.9893	5.43967	1.29183	41.757	84.3227	0	1
20.4763	5.64669	1.34099	42.2303	147.56	0	1
19.6337	6.20482	1.47354	36.9542	172.728	0	1
16.402	4.74257	1.12628	31.3644	231.863	0	1
22.1695	4.95254	1.17614	50.9051	61.8781	0	1
22.9901	5.58025	1.32521	48.1951	72.76	0	1
23.4371	5.23899	1.24417	44.3113	41.82	0	1
17.7879	5.29464	1.25739	39.1116	183.766	0	1
25.4736	5.23139	1.24236	55.6888	24.1424	0	1
18.9675	5.67509	1.34774	51.8448	145.409	0	1
18.1017	5.16312	1.22615	37.5272	219.832	0	1
22.2587	5.28571	1.25527	45.9083	36.3943	0	1
23.1104	5.0386	1.19658	51.5682	85.7131	0	1
17.577	5.48609	1.30285	38.8905	162.12	0	1
22.6422	5.29302	1.257	45.6354	52.8577	0	1
25.0482	5.39781	1.28189	59.3307	45.5613	0	1
18.6242	5.27121	1.25182	39.2712	139.846	0	1
19.3139	4.76135	1.13074	39.7763	104.899	0	1
16.3927	4.7618	1.13085	43.3519	194.878	0	1
16.9557	5.38227	1.2782	29.9141	204.125	0	1
15.0053	3.58245	0.850769	31.4867	228.638	0	1
22.3195	4.74916	1.12784	47.6603	61.6985	0	1
19.9364	5.7863	1.37414	44.3801	183.646	0	1
18.2457	4.60652	1.09397	36.387	221.697	0	1
21.2113	4.26761	1.01348	44.8399	5.1	0	1
17.4432	4.98908	1.18482	34.7205	197.355	0	1
21.6794	4.90237	1.16423	45.1135	18.7	0	1
20.0452	4.52696	1.07507	48.6443	72.0808	0	1
19.8708	5.31115	1.26131	46.3425	107.445	0	1
19.6509	5.62642	1.33618	49.5094	120.037	0	1
18.9696	4.44496	1.0556	45.8852	65.0289	0	1
17.7805	4.83484	1.14819	37.1109	178.243	0	1
24.2008	4.65947	1.10654	61.7751	49.9754	0	1
18.8822	4.53461	1.07689	42.1973	132.757	0	1
18.4017	5.14162	1.22104	36.5029	190.849	0	1
18.8533	4.50339	1.06948	43.3815	35.7	0	1
20.4528	4.86245	1.15475	48.6175	121.38	0	1
24.7767	5.05825	1.20125	52.4913	40.12	0	1
19.0204	4.12005	0.978439	39.5527	211.142	0	1
22.3134	4.16119	0.988211	43.8463	64.5508	0	1
18.9001	4.88664	1.16049	47.0513	112.706	0	1
12.4603	3.09165	0.734213	24.8941	226.632	0	1
17.0346	3.80851	0.904455	30.7021	201.831	0	1
20.6942	4.73492	1.12446	50.3001	100.677	0	1
18.5829	4.16581	0.989308	41.2786	93.1699	0	1
18.9283	4.82787	1.14653	44.4078	136.265	0	1
18.6991	3.97738	0.944557	39.2002	192.985	0	1
22.3491	4.10366	0.974547	46.8232	32.6418	0	1
16.5012	4.25547	1.0106	40.5401	120.855	0	1
22.2212	4.27729	1.01578	52.0767	183.466	0	1
20.7403	4.50194	1.06913	54.8973	49.8074	0	1
17.7768	4.17332	0.991091	38.0635	198.634	0	1
20.0607	4.21475	1.00093	60.4066	78.2598	0	1
14.7553	3.13228	0.743861	29.5899	219.151	0	1
16.4398	3.25133	0.772134	38.6673	204.579	0	1
19.8769	4.35	1.03305	47.7558	168.849	0	1
18.8504	4.10407	0.974644	49.3789	110.801	0	1
18.911	4.11191	0.976507	54.1822	61.2	0	1
20.5377	4.13317	0.981555	47.6683	15.98	0	1
19.9632	4.12523	0.97967	39.6943	149.431	0	1
19.3813	4.15385	0.986466	45.5318	130.024	0	1
16.3621	3.88477	0.922566	36.5864	156.042	0	1
22.3769	4.30289	1.02186	46.4751	46.92	0	1
18.5315	3.93558	0.934631	40.2211	139.846	0	1
21.0741	4.11597	0.977471	48.6369	31.6492	0	1
16.5296	2.98087	0.707905	32.2417	194.284	0	1
18.4701	3.87148	0.919409	44.0616	87.1157	0	1
11.1831	1.71488	0.407254	24.4308	209.47	0	1
20.0674	4.10861	0.975724	48.0112	71.5165	0	1
16.1003	3.51064	0.833715	33.6535	179.637	0	1
19.7675	3.94289	0.936367	44.1553	147.35	0	1
13.5349	2.37349	0.563664	28.8819	197.652	0	1
16.4574	3.64964	0.866725	33.5158	169.533	0	1
22.8889	4.40625	1.04641	50.1059	51.7884	0	1
21.8279	3.48361	0.827296	58.4836	156.679	0	1
19.8489	3.96223	0.94096	44.6421	130.667	0	1
23.2905	4.13111	0.981066	42.5296	28.4241	0	1
19.768	4.27586	1.01544	46.6003	63.4717	0	1
21.1866	3.55136	0.843387	43.3208	114.951	0	1
12.0655	2	0.474965	23.0177	192.689	0	1
21.603	3.79697	0.901714	56.147	22.5325	0	1
16.5	3.5017	0.831593	40.8146	139.4	0	1
20.4437	3.39437	0.806103	50.7077	72.0391	0	1
17.4585	3.31865	0.788122	35.6088	106.211	0	1
16.5908	3.54154	0.841054	37.4492	148.259	0	1
16.7917	3.44853	0.818966	41.7328	126.213	0	1
11.136	1.82272	0.432864	26.1015	183.177	0	1
13.0141	2.62898	0.624336	31.5654	158.8	0	1
17.7687	3.47421	0.825064	38.421	107.175	0	1
17.9188	3.57077	0.847995	43.0302	58.0843	0	1
16.6895	2.33858	0.555373	43.8549	170.561	0	1
17.251	3.48178	0.826862	42.8441	112.482	0	1
18.9453	3.56018	0.84548	46.9103	84.7753	0	1
19.0712	3.21108	0.762576	41.8232	95.4147	0	1
15.0865	2.66297	0.632409	35.4878	163.162	0	1
18.2439	3.67418	0.872554	43.0779	49.5701	0	1
20.3892	3.73529	0.887067	44.3304	75.5298	0	1
19.6545	3.56101	0.845679	43.2662	130.787	0	1
13.8514	1.51134	0.358916	25.4811	175.422	0	1
20.507	3.70465	0.87979	41.7605	67.7701	0	1
13.2004	2.74739	0.652457	32.1315	150.913	0	1
19.3308	3.30561	0.785025	39.9826	6.45105	0	1
24.4112	4.22462	1.00327	62.8845	40.156	0	1
19.3086	3.47658	0.825626	48.622	86.7666	0	1
19.1361	3.64795	0.866324	44.8942	56.7158	0	1
19.9307	4.06217	0.964694	46.6874	28.483	0	1
16.3135	2.94414	0.699183	40.1532	106.148	0	1
19.5761	3.72291	0.884126	48.9177	47.2893	0	1
16.2937	3.06875	0.728775	44.2583	134.853	0	1
18.4476	3.20905	0.762093	40.8211	93.5692	0	1
20.0718	3.37864	0.802368	45.0233	84.7412	0	1
24.1051	3.60636	0.856447	64.0196	36.91	0	1
19.4983	3.63423	0.863066	42.0235	66.4428	0	1
19.7923	3.59487	0.853719	43.2667	108.161	0	1
15.2738	2.98016	0.707736	40.4524	6.69722	0	1
11.7567	1.59084	0.377796	28.3633	142.656	0	1
18.1477	3.24161	0.769826	41.0134	72.9702	0	1
18.542	2.98002	0.707702	45.3229	93.734	0	1
16.8705	3.06885	0.728799	39.059	125.028	0	1
18.5579	3.42105	0.81244	40.9895	34.4123	0	1
13.8345	1.85017	0.439384	49.8815	131.952	0	1
19.0822	3.37369	0.801193	43.157	42.7725	0	1
19.8567	3.29299	0.782029	55.535	83.4581	0	1
20.3741	3.30216	0.784205	53.5791	98.6404	0	1
18.7586	2.52024	0.598513	42.4948	111.637	0	1
16.0415	3.16996	0.75281	58.6047	3.04105	0	1
19.2877	3.26438	0.775234	43.0411	12.1071	0	1
19.9551	3.71474	0.882187	42.0577	40.7348	0	1
17.5823	3.04762	0.723756	43.3074	89.5234	0	1
25.0451	4.09976	0.973622	46.3824	47.9098	0	1
18.651	3.29332	0.782105	52.1658	81.4788	0	1
19.4038	3.26366	0.775062	43.9525	100.606	0	1
33.4745	6.54366	1.554	74.0857	54.3341	0	1
13.7616	1.74747	0.414995	33.7091	107.279	0	1
20.0685	3.05623	0.725803	42.7677	87.9576	0	1
24.9067	3.45556	0.820634	47.0356	10.3407	0	1
22.5259	4.11466	0.977161	49.6637	74.498	0	1
18.653	2.69079	0.639016	51.4359	98.7125	0	1
23.9112	3.87443	0.920109	54.7121	36.1121	0	1
18.7667	2.56	0.607955	47.3067	76.7075	0	1
19.8411	2.25651	0.535882	41.7214	84.1677	0	1
20.5359	3.43678	0.816176	45.1595	7.07494	0	1
24.7899	3.7785	0.897328	51.0179	66.1674	0	1
18.6292	3.22997	0.767063	43.2028	2.40416	0	1
29.9269	3.99231	0.948104	50.9731	41.0725	0	1
21.4884	5.09512	1.21	45.2031	26.2153	0	1
20.0064	3.00912	0.714615	55.3878	12.1642	0	1
12.9684	2.66914	0.633875	38.8532	2.40416	0	1
17.835	3.29369	0.782194	40.8592	7.2285	0	1
21.6658	3.1671	0.75213	46.8398	12.1737	0	1
17.926	2.80274	0.665602	58.9781	11.3021	0	1
19.4514	5.14255	1.22127	47.9093	45.3234	0	1
18.6471	6.74462	1.60173	43.6083	122.91	0	1
20.403	4.68849	1.11343	47.2334	46.285	0	1
19.7439	4.55627	1.08204	51.4683	67.0223	0	1
21.3091	5.07273	1.20468	50.8965	15.3038	0	1
20.1968	4.93509	1.172	50.146	77.6459	0	1
17.6513	5.3395	1.26804	42.8309	114.354	0	1
17.8138	4.90692	1.16531	45.2578	94.0621	0	1
17.5847	5.34853	1.27018	39.7524	129.118	0	1
18.1878	5.01878	1.19187	38.5477	149.925	0	1
15.4649	4.11565	0.977394	30.8685	218.568	0	1
17.9142	4.466	1.0606	37.8053	169.029	0	1
17.5115	4.13811	0.982728	42.8465	154.185	0	1
17.5917	4.13974	0.983116	42.0677	29.58	0	1
21.0233	4.10169	0.974081	47.4513	87.38	0	1
17.7644	4.38149	1.04053	35.8626	181.035	0	1
17.9854	3.76091	0.893152	45.0728	73.8747	0	1
15.3953	3.64358	0.865287	31.3193	216.677	0	1
17.6658	4.25266	1.00993	36.4273	20.4	0	1
18.0171	4.01467	0.953414	46.8435	101.049	0	1
18.1737	3.69479	0.877448	47.67	89.4614	0	1
21.4192	4.28892	1.01854	46.7275	26.1888	0	1
18.0859	3.90657	0.927741	50.7525	90.5837	0	1
14.8607	3.34819	0.795137	30.2507	190.883	0	1
21.5518	4.21092	1.00002	47.7702	41.5301	0	1
18.1122	3.27699	0.778228	43.1108	110.28	0	1
19.0197	3.48197	0.826907	48.9443	11.2252	0	1
19.5887	3.53099	0.838548	41.5761	79.5549	0	1
18.2531	3.87257	0.919667	45.3929	100.982	0	1
13.6468	2.6856	0.637782	29.2078	180.682	0	1
16.9719	3.78834	0.899664	40.5875	129.544	0	1
18.2126	3.71391	0.881989	44.2402	119.883	0	1
14.1392	2.7411	0.650964	39.1553	167.107	0	1
20.7317	3.69884	0.878411	45.5367	82.5647	0	1
18.543	3.67136	0.871884	44.6385	75.0014	0	1
19.0469	3.77031	0.895384	42.1234	93.6482	0	1
17.6763	4.1079	0.975556	37.9097	9.33608	0	1
15.5456	3.47719	0.825773	34.9105	149.087	0	1
17.2605	3.50602	0.83262	42.9518	100.642	0	1
20.2834	3.55308	0.843794	48.8641	122.644	0	1
16.6854	3.0493	0.724155	40.6948	141.366	0	1
17.5739	3.17806	0.754734	39.5914	93.2474	0	1
10.7409	1.84134	0.437286	33.6739	158.287	0	1
20.0829	3.47312	0.824805	52.2089	74.6701	0	1
15.19	2.65346	0.630149	36.4085	142.561	0	1
22.5227	3.77674	0.89691	49.4866	66.2093	0	1
12.6254	2.14012	0.508241	30.8791	146.603	0	1
19.3393	3.31818	0.78801	53.1631	103.07	0	1
15.9409	2.7834	0.66101	40.3938	87.8655	0	1
21.0381	3.86681	0.9183	48.7611	53.9947	0	1
18.9633	3.42878	0.814276	61.1733	25.4365	0	1
22.4036	3.60602	0.856367	49.71	67.4684	0	1
22.1061	3.59259	0.853178	45.9949	23.4822	0	1
21.3747	3.54684	0.842312	47.8494	35.3665	0	1
18.8419	3.24259	0.770059	45.1745	92.1174	0	1
16.7658	3.25465	0.772922	39.0204	15.9329	0	1
18.5848	3.54498	0.841872	51.2907	19.8048	0	1
18.1203	3.19599	0.758992	42.4588	76.0263	0	1
18.5657	3.01768	0.716646	57.1566	19.383	0	1
20.5824	3.39829	0.807034	54.7345	21.5947	0	1
19.9214	4.44869	1.05649	45.3308	63.58	0	1
19.5846	4.93319	1.17155	73.0689	31.9763	0	1
14.7876	5.22539	1.24094	34.7539	122.608	0	1
19.6128	4.84299	1.15013	44.247	66.3314	0	1
21.0844	4.69849	1.11581	47.4131	13.9441	0	1
15.0696	4.63291	1.10024	31.307	171.588	0	1
16.7727	5.02392	1.19309	39	124.075	0	1
20.7131	4.51865	1.0731	46.056	81.8292	0	1
21.3411	4.52331	1.07421	42.5138	22.78	0	1
14.542	3.79867	0.902119	33.1062	214.48	0	1
17.5507	4.28634	1.01793	40.9537	159.836	0	1
22.2309	4.32216	1.02644	51.0466	77.1807	0	1
19.3234	4.07664	0.96813	43.8056	64.94	0	1
17.8597	3.91472	0.929677	45.5791	162.32	0	1
20.7009	3.86756	0.918478	53.4092	109.244	0	1
17.2308	4.15089	0.985764	41.5118	167.214	0	1
13.4165	3.61882	0.859408	30.5859	141.239	0	1
15.481	3.5788	0.849904	38.2636	130.444	0	1
18.5227	3.41766	0.811635	46.8425	16.5451	0	1
17.3245	3.85598	0.915729	41.7525	142.61	0	1
17.0764	3.60889	0.857049	37.5587	37.3226	0	1
17.425	3.30015	0.783728	41.2036	69.5763	0	1
22.5886	4.83273	1.14769	53.6582	27.6134	0	1
12.5878	2.96396	0.70389	44.1734	48.1697	0	1
18.1981	3.28846	0.780952	40.6865	108.462	0	1
19.9038	3.67735	0.873307	55.406	40.6211	0	1
17.5013	3.05829	0.726291	40.1503	96.8761	0	1
17.7268	3.55143	0.843404	37.3002	49.2167	0	1
17.4441	3.15724	0.74979	36.9434	109.387	0	1
17.5079	3.27717	0.77827	40.7717	15.8164	0	1
20.0018	3.6476	0.866242	40.0387	46.9951	0	1
14.6161	2.21572	0.526195	33.0128	123.277	0	1
17.203	3.31413	0.787048	40.9232	75.1585	0	1
18.0911	3.38761	0.804498	50.1798	28.8359	0	1
20.1714	3.96623	0.941911	57.0351	35.9324	0	1
18.7881	3.51269	0.834203	41.9886	2.885	0	1
13.9186	2.75573	0.654437	37.9746	19.1761	0	1
16.3055	2.83806	0.673991	39	6.69722	0	1
17.7873	3.0546	0.725415	38.4947	7.54923	0	1
20.0131	5.03986	1.19688	50.6344	176.468	0	1
16.0668	4.15707	0.987231	29.75	207.44	0	1
15.6572	4.88365	1.15978	30.6164	179.336	0	1
21.8597	5.67182	1.34696	51.3335	91.4827	0	1
19.1328	4.97715	1.18199	38.6039	153.097	0	1
19.6564	4.84268	1.15005	47.6854	102.028	0	1
21.1131	4.72097	1.12115	45.3137	32.7267	0	1
16.9081	4.69333	1.11458	31.0785	202.169	0	1
22.3696	4.81573	1.14365	49.1553	44.2	0	1
15.5264	3.95402	0.939012	33.823	127.589	0	1
20.2301	4.40036	1.04501	46.7264	110.602	0	1
19.2175	3.9687	0.942497	48.1384	189.457	0	1
17.3016	4.18421	0.993677	35.4008	12.2447	0	1
16.8268	3.80952	0.904696	37.9632	141.849	0	1
21.3914	4.06407	0.965145	41.7368	19.383	0	1
17.8466	3.80462	0.903531	42.5903	49.5631	0	1
15.6104	3.63916	0.864236	38.094	172.484	0	1
16.8894	3.40567	0.808788	45.6184	135.185	0	1
12.0982	2.63049	0.624696	26.6408	171.436	0	1
16.6708	3.12629	0.74244	36.5052	114.376	0	1
15.9619	3.12896	0.743075	38.3742	151.237	0	1
15.1506	3.37653	0.801868	33.6112	61.1783	0	1
16.0367	2.85472	0.677947	35.8209	155.408	0	1
13.4949	2.36711	0.562147	34.0793	162.525	0	1
16.9433	3.39175	0.805482	47.2371	124.264	0	1
16.1669	3.12276	0.741601	44.4345	6.20442	0	1
16.234	3.51887	0.83567	43.6075	133.718	0	1
18.6448	3.51257	0.834174	39.2131	64.6224	0	1
19.9254	3.66045	0.869294	45.3742	41.0218	0	1
10.0363	1.53631	0.364848	39.1341	109.965	0	1
20.0631	2.91716	0.692775	45.211	95.0742	0	1
16.7894	2.75394	0.654012	37.3524	81.4327	0	1
16.8922	2.91918	0.693253	34.4548	15.688	0	1
22.1488	2.92298	0.694156	54.094	17.2632	0	1
18.4359	4.32234	1.02648	55.5165	56.4902	0	1
16.4899	3.50067	0.831348	35.9034	219.735	0	1
15.9369	4.57071	1.08546	36.4596	133.17	0	1
12.6303	3.07003	0.729078	25.479	233.297	0	1
17.0627	4.21483	1.00095	41.0152	8.89865	0	1
16	3.53728	0.840043	38.9561	123.667	0	1
19.1054	4.85347	1.15261	43.928	157.258	0	1
17.3459	4.05013	0.961834	38.4311	52.36	0	1
17.0029	3.1513	0.748378	43.4539	150.076	0	1
16.3971	4.05811	0.963731	38.5206	79.384	0	1
16.4904	3.6713	0.871871	30.9687	185.856	0	1
16.883	3.53745	0.840083	48.8003	3.06	0	1
19.0745	3.90503	0.927376	47.5605	142.257	0	1
18.0319	3.71987	0.883404	46.1713	131.112	0	1
16.3139	3.51766	0.835384	43.0394	13.133	0	1
23.6971	4.08571	0.970286	61.6357	44.1542	0	1
19.725	3.52035	0.836022	42.1716	65.5707	0	1
14.7073	3.1688	0.752536	35.9594	9.03402	0	1
17.5198	2.68074	0.636629	52.3377	83.5937	0	1
21.7366	3.58611	0.851638	45.0362	23.3241	0	1
15.9128	3.40596	0.808857	35.4748	34.9523	0	1
14.4737	2.64098	0.627186	37.4248	100.434	0	1
17.9008	2.99805	0.711986	42.8833	8.65499	0	1
19.6537	4.15821	0.987502	46.5403	81.6113	0	1
18.3341	5.54808	1.31757	46.4904	104.787	0	1
17.9865	4.49662	1.06787	38.9341	81.8828	0	1
18.1912	4.01809	0.954226	46.6408	55.9927	0	1
17.4122	4.62295	1.09787	39.8525	11.0696	0	1
14.1173	3.3801	0.802715	31.0408	213.906	0	1
17.4791	3.54341	0.841498	35.5949	199.729	0	1
16.8916	3.76707	0.894613	35.6667	31.96	0	1
16.3499	3.06887	0.728803	39.8953	159.126	0	1
18.9941	4.90316	1.16442	57.3636	115.209	0	1
11.1844	2.11475	0.502217	22.375	202.657	0	1
19.5941	3.35215	0.796077	39.0296	173.408	0	1
20.9298	3.57871	0.849881	56.6659	77.9424	0	1
17.8056	3.28655	0.780498	46.5249	39.5366	0	1
16.1516	3.29412	0.782296	42.7817	19.5108	0	1
16.6152	1.88478	0.447603	38.2761	109.757	0	1
19.1657	3.76393	0.893868	41.2009	33.043	0	1
15.7024	2.98887	0.709805	43.2364	15.4541	0	1
17.1105	2.90177	0.689121	47.9332	2.92479	0	1
16.5325	2.76104	0.655699	44.3844	20.5496	0	1
22.0418	6.72814	1.59782	56.9629	13.3296	0	1
18.6913	5.8734	1.39483	47.9004	94.899	0	1
16.9703	3.82189	0.907633	39.1855	70.72	0	1
12.6	2.83944	0.674317	26.2986	211.103	0	1
14.8542	3.4123	0.810362	32.7449	131.453	0	1
14.7823	2.82025	0.669761	29.8532	195.234	0	1
12.7444	2.33002	0.55334	30.0074	177.286	0	1
21.2323	3.44424	0.817947	45.2491	140.157	0	1
23.6286	6.92461	1.64447	49.1452	40.1214	0	1
25.4389	5.92366	1.40677	65.9962	112.671	0	1
21.1725	5.6317	1.33743	58.4965	119.349	0	1
15.8488	3.37931	0.802527	38.9867	8.02429	0	1
45.8113	9.37003	2.30583	29.5745	83.7567	1	2
61.7298	12.3427	3.03737	36.0997	65.1453	1	2
93.4934	25.6446	6.31079	35.2966	52.3666	1	2
75	23.2136	5.71255	38.6843	34.3669	1	2
117.374	8.66384	2.13205	29.0113	97.9206	1	2
135.845	40.878	10.0595	35.9956	32.9116	1	2
56.3679	8.2211	2.0231	32.111	90.116	1	2
83.3916	27.4209	6.74791	32.6796	40.5556	1	2
67.4178	57.8426	14.2343	31.3719	21.0827	1	2
118.144	58.3102	14.3493	31.4315	32.1781	1	2
61.1737	5.06338	1.24603	29.9812	52.8588	1	2
49.3856	14.8147	3.64569	36.2761	33.1548	1	2
83.6496	9.36136	2.3037	36.009	84.6818	1	2
90.2788	18.0719	4.44724	32.4089	65.8179	1	2
84.7208	18.8567	4.64038	30.1637	61.43	1	2
78.1033	11.8767	2.92268	25.6633	125.062	1	2
76.6231	10.0744	2.47916	26.7179	107.304	1	2
75.0086	22.3371	5.49686	28.0829	57.3341	1	2
62.1684	10.0947	2.48418	28.1663	116.85	1	2
70.5743	29.0545	7.1499	30.5693	43.8719	1	2
41.9407	7.38061	1.81627	23.6903	117.99	1	2
142.062	34.2335	8.4244	31.5287	35.3665	1	2
122.986	37.726	9.28385	33.9056	26.3385	1	2
64.4665	11.2655	2.77229	27.3772	107.113	1	2
62.6648	15.7169	3.86771	35.3944	51.242	1	2
84.7449	22.0059	5.41534	29.8622	61.5485	1	2
75.087	9.44837	2.32511	23.5136	133.717	1	2
88.7701	11.3601	2.79557	25.7673	121.646	1	2
46.5357	4.04762	0.996063	22.1262	128.996	1	2
69.5757	12.8549	3.16341	30.5473	105.339	1	2
71.3247	9.93678	2.4453	25.3276	124.87	1	2
111.442	22.6372	5.57069	29.8991	62.1782	1	2
59.2899	10.5521	2.59673	32.5749	109.735	1	2
65.5099	6.10596	1.50259	24.6623	168.59	1	2
60.4766	26.1598	6.43756	30.6364	42.079	1	2
100.715	8.00253	1.96931	28.0152	117.671	1	2
96.4941	10.5059	2.58536	26.0307	127.225	1	2
83.5417	11.6076	2.85648	25.6319	134.374	1	2
78.3846	9.57452	2.35616	27.8125	95.676	1	2
97.087	12.5084	3.07813	24.9799	121.863	1	2
72.2454	24.8598	6.11764	34.9527	37.1457	1	2
94.4828	8.85893	2.18006	27.4984	122.778	1	2
94.8304	10.5038	2.58484	29.1392	113.003	1	2
50.6925	3.52805	0.868203	29.5513	42.1723	1	2
65.9444	16.8201	4.1392	29.1905	70.1983	1	2
62.7419	4.84211	1.19158	31.1955	32.0629	1	2
103.957	8.35992	2.05726	30.6728	120.091	1	2
126.553	58.7429	14.4558	25.7377	27.5379	1	2
18.7258	4.29314	1.05648	31.5319	159.12	0	2
19.5695	4.06271	0.999777	28.8475	101.661	0	2
23.5425	4.55479	1.12087	44.0247	43.18	0	2
19.5737	4.11218	1.01195	32.891	90.1	0	2
24.5342	4	0.984345	52.8646	18.0232	0	2
16.6923	3.60535	0.887227	24.9197	179.34	0	2
18.6203	4.08472	1.00519	29.8306	190.707	0	2
19.5799	4.45946	1.09741	31.715	126.833	0	2
20.0451	4.75847	1.17099	26.9097	141.281	0	2
20.6156	4.68548	1.15303	33.2151	47.9508	0	2
16.8161	3.89118	0.957566	22.6098	172.707	0	2
25.5512	4.97846	1.22513	39.4794	119.026	0	2
20.9322	4.47425	1.10105	35.5854	56.3057	0	2
17.6059	4.49053	1.10506	25.3425	151.534	0	2
17.3778	4.02519	0.990543	24.6297	193.061	0	2
19.0635	4.31519	1.06191	29.9592	97.6268	0	2
21.3983	3.96657	0.976119	39.0487	38.233	0	2
26.6316	4.9919	1.22844	50.4474	61.6489	0	2
22.2425	4.14208	1.01931	41.381	45.7739	0	2
19.4545	4.11174	1.01184	29.6742	156.705	0	2
20.7033	4.67519	1.1505	34.3529	91.6059	0	2
19.8667	4.44286	1.09333	25.0333	136.426	0	2
20.1003	4.55536	1.12101	35.0796	34.7483	0	2
14.6364	3.85124	0.947737	20.1694	192.778	0	2
21.5488	4.83939	1.19091	33.9197	64.6188	0	2
20.6676	4.73803	1.16596	30.8291	99.9467	0	2
22.8581	4.33051	1.06568	34.3305	22.6885	0	2
20.0757	4.20983	1.03598	30.3307	81.1775	0	2
22.0175	4.11662	1.01304	34.9886	38.839	0	2
17.6519	3.70864	0.912645	25.642	200.285	0	2
16.1627	4.50888	1.10957	24.0621	151.496	0	2
22.7415	4.93629	1.21475	35.4848	104.067	0	2
22.5985	4.12741	1.0157	42.5405	38.6001	0	2
14.281	2.45354	0.603782	34.3186	17.4827	0	2
23.0046	4.94604	1.21715	31.721	117.223	0	2
16.3956	4.41099	1.08548	23.3187	207.107	0	2
19.4755	4.75906	1.17114	32.7846	107.775	0	2
25.5538	4.9418	1.21611	39.8131	66.2171	0	2
19.5558	4.93625	1.21474	28.6474	85.8848	0	2
17.607	4.51579	1.11127	26.0421	119.97	0	2
25.2822	4.75327	1.16971	36.0411	97.1008	0	2
21.1081	4.46525	1.09884	36.2201	17.0983	0	2
25.6079	4.63684	1.14106	39.8618	44.4087	0	2
21.4874	5.0405	1.2404	35.2723	64.676	0	2
20.4366	4.64885	1.14402	31.4076	77.177	0	2
18.2835	4.41237	1.08582	26.0335	140.352	0	2
25.4195	4.28907	1.05548	44.9213	11.0696	0	2
22.6735	4.95292	1.21884	31.3552	109.034	0	2
17.742	4.44472	1.09378	28.2359	73.2335	0	2
20.1165	5.26523	1.2957	30.5251	139.41	0	2
15.6406	3.90234	0.960313	24.1641	138.019	0	2
21.9278	4.87898	1.20065	37.3949	46.3461	0	2
19.6163	4.03837	0.993787	31.7314	81.4199	0	2
22.0306	4.28	1.05325	35.0941	138.657	0	2
20.0818	4.15337	1.02209	36.638	168.887	0	2
16.7991	3.55983	0.876025	32.4915	149.639	0	2
17.6643	4.1406	1.01894	24.5255	159.272	0	2
19.1604	4.71875	1.16122	30.9646	93.8997	0	2
22.2774	5.30425	1.3053	36.3244	59.5039	0	2
16.8789	4.2209	1.03871	24.342	151.918	0	2
18.9421	4.35849	1.07256	24.9044	144.701	0	2
21.0851	4.31381	1.06157	35.1562	25.2426	0	2
23.78	3.85111	0.947705	54.0089	39.3049	0	2
26.1748	5.06536	1.24651	43.4036	46.867	0	2
19.5969	4.73902	1.16621	30.155	100.43	0	2
21.1364	4.36932	1.07523	35.6089	73.4416	0	2
19.5151	4.24932	1.0457	27.6466	152.771	0	2
22.6272	5.18966	1.2771	36.7522	28.0227	0	2
15.1051	4.54354	1.1181	23.1051	145.411	0	2
25.1699	4.48387	1.10342	57.6215	49.9337	0	2
18.2529	4.29344	1.05656	25.0241	129.196	0	2
30.3079	5.79019	1.42489	46.9305	35.3109	0	2
22.0483	4.86126	1.19629	27.6756	130.986	0	2
21.5505	4.17819	1.0282	31.2766	57.463	0	2
19.9331	4.27151	1.05116	27.3136	120.303	0	2
21.4344	4.56851	1.12425	34.3499	40.3241	0	2
20.2609	4.43478	1.09134	31.4551	86.6333	0	2
18.6645	4.40552	1.08414	26.8301	134.235	0	2
17.3267	3.78125	0.930513	25.5682	148.423	0	2
19.1493	4	0.984345	38.1611	20.4481	0	2
20.1429	4.08756	1.00589	33.4539	30.4789	0	2
21.9519	4.52139	1.11265	32.6872	47.999	0	2
25.4345	5.20787	1.28158	41.5412	65.068	0	2
17.9588	4.3732	1.07618	28.5876	103.553	0	2
23.4375	4.63603	1.14086	37.6985	78.6643	0	2
20.538	4.63166	1.13979	31.0937	126.421	0	2
20.2095	4.96266	1.22124	33.917	91.4771	0	2
20.2292	4.98281	1.2262	31.7837	108.538	0	2
19.2848	4.96304	1.22134	28.8674	95.0013	0	2
18.5356	3.31261	0.815189	33.468	17.8945	0	2
20.1534	4.93067	1.21337	28.834	113.376	0	2
18.4022	4.07742	1.0034	25.172	115.466	0	2
20.4096	4.17819	1.0282	32.9096	55.081	0	2
19.2566	4.73621	1.16552	28.765	92.7259	0	2
17.8825	4.31197	1.06112	25.7564	132.377	0	2
21.8098	4.20612	1.03507	37.0532	37.9462	0	2
21.3815	4.31335	1.06146	33.6757	20.5581	0	2
17.9653	4.53819	1.11679	25.8102	102.552	0	2
22.8446	4.82893	1.18833	34.7339	78.8368	0	2
21.9791	3.94241	0.970172	43.4843	58.1986	0	2
18.6196	4.5625	1.12277	29.3614	112.848	0	2
22.2464	3.83333	0.94333	35.0676	34.987	0	2
15.5386	3.2717	0.805121	30.1141	27.3547	0	2
18.2433	4.53795	1.11673	27.8817	103.374	0	2
22.5885	4.5747	1.12577	32.6068	79.5084	0	2
26.8257	4.46053	1.09767	55.1382	45.4953	0	2
16.3325	3.88424	0.955857	24.9557	122.317	0	2
23.0227	4.65204	1.1448	39.8033	84.4255	0	2
18.7886	4.0935	1.00735	33.3306	49.1955	0	2
20.1653	4.01067	0.98697	36.8613	15.8493	0	2
19.5091	4.87627	1.19998	31.2069	92.7247	0	2
22.9112	4.92238	1.21133	35.572	67.5814	0	2
20.0119	4.29154	1.05609	33.7333	60.2577	0	2
21.3043	3.69293	0.90878	46.3614	36.4371	0	2
12.737	4.13802	1.01831	36.724	4.26019	0	2
20.6367	5.06972	1.24759	32.9174	75.5076	0	2
22.4782	4.11034	1.0115	35.2092	59.3609	0	2
20.2	4.0037	0.985256	33.3759	54.9287	0	2
24.2618	4.81709	1.18542	38.6714	46.3224	0	2
19.5234	5.19393	1.27815	30.9953	80.0626	0	2
22.0442	3.97619	0.978485	43.1837	17.7973	0	2
20.8255	4.625	1.13815	33.487	86.3848	0	2
18.2547	4.0334	0.992565	29.9395	104.861	0	2
21.4786	3.98054	0.979557	39.3891	59.5039	0	2
19.4936	3.80899	0.937339	38.0706	7.45678	0	2
21.467	4.11337	1.01224	42.0711	60.2683	0	2
20.6183	4.76815	1.17338	29.6183	51.2544	0	2
19.396	4.11457	1.01254	39.3225	21.6588	0	2
19.7015	4.64829	1.14388	32.9221	75.2507	0	2
16.5205	4.94152	1.21604	31.2982	81.3197	0	2
20.633	4.69689	1.15584	33.0276	90.9168	0	2
22.5659	4.44373	1.09354	36.6495	43.0029	0	2
19.3121	3.99089	0.982102	33.6993	33.9353	0	2
16.9831	4.16698	1.02544	29.4447	98.4334	0	2
18.9376	4.13078	1.01653	34.1952	24.3308	0	2
24.5618	4.94607	1.21716	55.4764	49.3	0	2
21.5915	4.36972	1.07533	33.2553	57.2696	0	2
18.9608	3.44706	0.848273	47.0549	1.92333	0	2
19.8825	3.30294	0.812807	51.6213	8.18828	0	2
22.5577	3.72692	0.917144	44.2423	18.774	0	2
23.1433	4.35166	1.07088	37.7569	38.7093	0	2
16.5928	3.88608	0.95631	29.9557	88.3431	0	2
21.6232	4.25613	1.04738	39.6546	31.1467	0	2
20.8429	4.36964	1.07531	38.5804	97.9064	0	2
17.8356	3.49778	0.860755	33.3733	22.8206	0	2
21.2053	4.61217	1.13499	35.8403	56.9416	0	2
19.7662	4.08633	1.00559	42.9604	46.2	0	2
20.1204	4.52546	1.11365	34.3588	76.204	0	2
17.1801	3.83175	0.942942	27.1896	101.929	0	2
19.5166	3.80818	0.937141	32.9514	31.8658	0	2
19.473	4.24266	1.04406	33.2303	62.3833	0	2
20.5909	3.54261	0.871788	49.7472	8.68831	0	2
20.291	4.4774	1.10183	33.0169	88.2724	0	2
16.6138	4.1023	1.00952	30.9144	68.6446	0	2
18.5957	4.53901	1.11699	34.8936	50.6919	0	2
17.7044	4.06444	1.0002	35.2956	31.9763	0	2
21.962	6.1345	1.50962	34.5409	18.498	0	2
17.2489	3.78571	0.931612	30.7814	79.9174	0	2
19.5267	4.13997	1.01879	36.5527	10.474	0	2
19.2121	3.82456	0.941172	28.8357	88.2514	0	2
18.8793	4.28468	1.0544	39.9514	1.22589	0	2
24.2816	5.01149	1.23326	41.5996	22.5991	0	2
16.8144	3.60149	0.886276	30.0569	100.207	0	2
18.9303	4.43707	1.0919	35.9609	56.9061	0	2
18.728	4.5977	1.13143	35.6169	68.8196	0	2
20.7653	4.42406	1.0887	39.6489	6.26929	0	2
18.5425	3.41503	0.840392	36.1732	84.9762	0	2
20.6706	5.15966	1.26972	37.9765	12.1737	0	2
21.2006	4.4878	1.10439	35.2502	42.8049	0	2
19.9471	4.29485	1.0569	36.5953	59.535	0	2
19.1453	3.67304	0.903884	44.2352	97.2495	0	2
17.6162	4.25505	1.04711	29.3283	105.08	0	2
18.9606	4.34767	1.0699	38.147	93.5303	0	2
21.2511	4.53797	1.11673	28.6097	117.332	0	2
21.6048	4.28343	1.05409	32.998	67.9677	0	2
18.2607	2.95493	0.727168	37.6736	18.36	0	2
19.0727	4.38182	1.0783	25.5364	141.21	0	2
19.9877	2.79238	0.687167	41.5135	5.48234	0	2
20.8211	4.13271	1.017	37.1113	89.5621	0	2
18.7074	4.24716	1.04517	29.0426	70.9615	0	2
16.7034	4.1573	1.02305	22.3798	188.97	0	2
18.289	5.23121	1.28733	27.1387	142.129	0	2
16.0892	4.25478	1.04704	22.4904	169.434	0	2
20.2401	4.8034	1.18205	35.5255	45.8029	0	2
19.577	3.50039	0.861398	41.8999	25.8042	0	2
19.3727	4.6677	1.14866	27.2702	124.969	0	2
17.6169	3.76407	0.926285	23.303	168.438	0	2
21.6804	4.60567	1.13339	28.1469	124.038	0	2
20.3576	4.13291	1.01705	27.3671	122.128	0	2
19.3595	4.0719	1.00204	29.4161	90.1943	0	2
22.039	4.35316	1.07125	35.0781	19.9067	0	2
18.6528	4.76684	1.17305	29.1788	97.3404	0	2
20.4411	4.83634	1.19016	32.7906	80.9921	0	2
21.1878	3.88873	0.956964	34.8623	33.9404	0	2
24.4514	3.78875	0.93236	52.2204	35.5816	0	2
16.7063	3.44822	0.84856	32.8563	7.45678	0	2
21.9918	4.41358	1.08612	36.3025	61.8174	0	2
20.102	4.34354	1.06888	25.3503	124.676	0	2
20.5608	4	0.984345	27.2448	111.463	0	2
18.7082	4.63279	1.14006	26.059	113.989	0	2
16.3736	4.05882	0.99882	24.2369	153.455	0	2
18.4745	3.92461	0.965793	30.306	68	0	2
18.6811	4.33583	1.06699	32.0469	58.1032	0	2
19.4631	4.35398	1.07145	27.646	116.382	0	2
19.9848	4.37056	1.07553	25.967	122.529	0	2
16.6991	3.81306	0.938341	33.4328	6.88448	0	2
17.5869	4.02331	0.99008	30.0085	77.7136	0	2
19.8574	3.60328	0.886717	35.8328	34.6817	0	2
20.0624	4.28297	1.05398	27.4029	132.999	0	2
20.0457	4.18269	1.0293	36.0577	62.727	0	2
18.0077	4.15667	1.0229	35.8975	50.524	0	2
20.2222	4.89459	1.20449	31.7407	96.4863	0	2
20.4172	3.88363	0.955708	33.4484	79.1178	0	2
16.8658	3.92911	0.966901	26.119	123.148	0	2
18.0781	3.19866	0.787146	37.2589	28.1523	0	2
17.3394	3.97278	0.977645	28.6987	39.3534	0	2
19.8609	3.55118	0.873897	42.9186	31.6492	0	2
17.8553	4.16077	1.02391	26.0547	112.565	0	2
16.9826	4.2029	1.03428	29.7594	92.5631	0	2
21.1068	4.31591	1.06209	40.1636	69.4965	0	2
20.657	3.63576	0.894711	40.7947	48.1649	0	2
19.6402	4.60981	1.13441	31.9136	70.3069	0	2
18.7721	4.33988	1.06798	28.7171	111.719	0	2
19.5192	4.40421	1.08382	35.3793	51.0827	0	2
18.6939	3.54957	0.873499	32.3583	11.033	0	2
18.6026	3.51923	0.866034	43.8269	37.6296	0	2
18.1484	3.51471	0.86492	35.5909	26.9288	0	2
19.8235	2.86957	0.70616	45.7418	17.37	0	2
19.6195	4.1587	1.0234	32.535	40.6211	0	2
19.0029	4.06513	1.00037	29.7021	72.8846	0	2
19.7795	4.29528	1.05701	34.3504	30.4599	0	2
19.0276	3.63568	0.89469	33.8518	16.9114	0	2
17.952	3.63505	0.894537	33.9184	7.35532	0	2
19.159	4.72991	1.16397	31.5795	85.8047	0	2
17.8223	3.57868	0.880664	28.6497	94.6215	0	2
17.3475	3.36162	0.827247	30.2929	40.0132	0	2
22.2292	3.75801	0.924795	43.6795	49.9569	0	2
20.5162	3.23684	0.796542	35.9879	29.8058	0	2
16.9259	3.8321	0.943026	29.5506	77.42	0	2
16.4	3.42308	0.842372	30.0308	38.8568	0	2
17.3533	3.92148	0.965022	29.9284	93.5785	0	2
20.1367	4.35443	1.07157	32.3595	53.9305	0	2
20.6485	4.29699	1.05743	30.9541	68.9798	0	2
18.5603	4.17427	1.02723	26.0293	152.021	0	2
15.9442	2.48605	0.611782	33.5605	14.1988	0	2
19.5425	4.49905	1.10716	25.0435	127.652	0	2
20.6842	4.7221	1.16204	33.8058	92.1249	0	2
22.3403	4.55717	1.12146	33.6987	100.604	0	2
21.3204	3.99515	0.98315	33.4126	52.4141	0	2
17.1205	4.13253	1.01696	23.491	138.964	0	2
18.8456	2.86615	0.70532	40.9575	21.6988	0	2
21.3724	4.13636	1.0179	32.8262	72.253	0	2
17.1303	3.45609	0.850496	34.6501	3.50051	0	2
18.6503	3.81347	0.938443	40.5233	34.5146	0	2
22.0227	4.54533	1.11854	37.3427	86.2421	0	2
20.283	3.70991	0.912956	36.0967	44.1346	0	2
18.6719	4.81388	1.18463	27.0978	91.6071	0	2
18.8227	3.59163	0.883851	34.0498	39.6111	0	2
21.5583	3.89046	0.957388	46.9823	18.2716	0	2
20.0263	4.31504	1.06187	30.6074	71.6174	0	2
17.7833	3.69283	0.908755	27.3072	84.8802	0	2
17.3447	3.65526	0.89951	26.7474	107.285	0	2
17.8266	3.50818	0.863314	34.3152	5.32184	0	2
20.9011	3.71494	0.914196	39.8644	19.956	0	2
21.0805	4.25854	1.04797	32.039	66.6816	0	2
18.2614	3.35277	0.82507	29.5462	52.4934	0	2
17.1853	4.34615	1.06953	22.2203	149.94	0	2
21.2622	4.34365	1.06891	30.4121	105.402	0	2
22.0708	4.61485	1.13565	31.3295	92.8256	0	2
20.5169	4.18403	1.02963	39.0893	73.1285	0	2
17.2561	3.52595	0.867688	31.6159	178.757	0	2
17.9939	4.09717	1.00826	29.2672	146.869	0	2
19.4978	2.95802	0.727928	43.1769	4.76	0	2
20.5011	4.71839	1.16113	29.3368	156.035	0	2
18.3957	3.94286	0.970283	25.6114	106.012	0	2
20.4099	3.4	0.836693	39.738	35.4938	0	2
17.6632	4.24739	1.04522	24.3711	153.299	0	2
20.661	3.86498	0.951118	35.6667	52.5429	0	2
18.3306	3.54032	0.871224	24.6667	174.693	0	2
19.6759	4.32687	1.06478	29.8144	110.356	0	2
17.2505	3.37769	0.831203	25.4364	157.377	0	2
19.0909	4.31941	1.06295	28.2039	121.652	0	2
19.9678	3.99463	0.983024	33.3882	72.7513	0	2
25.3209	4.25746	1.0477	46.3731	113.656	0	2
25.6389	4.73333	1.16481	45.9917	108.297	0	2
20.2	4.22692	1.04019	25.3365	132.134	0	2
20.7495	3.65805	0.900196	41.2048	28.0474	0	2
19.2945	4.75059	1.16906	29.0926	97.9914	0	2
15.4085	3.19224	0.785565	29.3697	18.5791	0	2
22.7455	4.08946	1.00636	38.5845	77.0428	0	2
20.1211	4.23969	1.04333	26.6134	119.666	0	2
17.6194	3.68056	0.905734	29.1667	58.1837	0	2
19.7997	3.89251	0.957892	32.702	60.9966	0	2
16.5057	4.8403	1.19113	23.5133	137.278	0	2
16.6708	3.20698	0.789194	29.3217	41.1667	0	2
18.238	3.14945	0.775035	39.1605	6.73166	0	2
20.1791	4.3189	1.06282	39.1634	56.0794	0	2
16.0578	4.02128	0.989581	25.1064	97.8751	0	2
21.8269	4.25561	1.04725	36.4341	55.3522	0	2
19.4326	3.44828	0.848573	35.0517	26.9695	0	2
19.9594	3.66826	0.902707	34.9356	43.0338	0	2
16.8683	3.9561	0.973541	29.1707	60.7773	0	2
17.4352	3.63325	0.894093	26.7286	84.4351	0	2
17.9315	3.78729	0.931999	27.4193	188.908	0	2
21.1464	4.49944	1.10725	32.9464	81.9407	0	2
18.7325	4.2707	1.05096	32.465	80.3473	0	2
22.7381	4.6057	1.1334	39.114	60.8258	0	2
16.1515	3.45455	0.850116	20.8264	231.008	0	2
19.2025	4.01266	0.98746	25.1266	120.439	0	2
21.3134	4.21393	1.03699	36.1493	58.1678	0	2
18.6358	4.75828	1.17095	30.6788	77.9498	0	2
19.2719	4.6	1.132	29.5368	91.8441	0	2
17.1479	3.67108	0.903402	30.6755	15.1786	0	2
16.8848	3.82584	0.941487	22.236	135.431	0	2
24.1333	4.71111	1.15934	36.3651	54.9466	0	2
15.5389	3.94819	0.971594	37.8782	1.40186	0	2
23.3279	4.19048	1.03122	49.5075	62.2209	0	2
18.0313	3.8604	0.949991	27.5755	70.4424	0	2
16.7633	4.0217	0.989684	30.714	49.9812	0	2
23.0417	3.87344	0.953199	43.5299	84.9245	0	2
19.417	3.79603	0.93415	31.8502	53.5875	0	2
16.7068	3.30847	0.81417	30.3678	33.7029	0	2
20.7855	4.42751	1.08955	34.6686	64.069	0	2
15.0674	2.63023	0.647264	28.9419	28.858	0	2
17.0498	3.44168	0.84695	32.8942	15.9836	0	2
15.8369	2.62366	0.645645	34.4104	26.9266	0	2
19.7251	4.32603	1.06458	28.8431	110.896	0	2
21.4118	4.64052	1.14197	35.7346	41.633	0	2
19.7145	4.4325	1.09078	32.2628	96.451	0	2
19.6139	3.30278	0.812768	38.4806	36.5433	0	2
18.2366	3.87277	0.953035	31.7232	44.575	0	2
18.4418	3.75661	0.924451	30.254	51.4693	0	2
20.9288	4.3905	1.08044	29.2375	119.34	0	2
16.4977	3.25	0.79978	26.8991	206.992	0	2
19.164	3.97884	0.979136	31.4603	82.4631	0	2
16.5681	3.83463	0.943649	23.7665	167.985	0	2
14.2269	3.28704	0.808894	19.0972	217.261	0	2
16.1808	3.51538	0.865088	25.1154	205.178	0	2
21.5296	3.60837	0.887971	37.3645	90.3786	0	2
17.5686	3.20392	0.788441	25.7294	177.997	0	2
17.2271	4.4626	1.09819	24.759	115.318	0	2
16.7701	3.40047	0.83681	28.3152	147.042	0	2
20.2054	3.95297	0.972771	29.5322	84.8182	0	2
14.9641	2.93094	0.721264	21.7762	178.141	0	2
16.5181	3.87681	0.95403	23.0145	170.786	0	2
17.2144	3.73347	0.918755	32.0762	17.7973	0	2
18.003	4.13636	1.0179	29.3667	72.253	0	2
30.3922	3.54902	0.873365	45.9706	50.7159	0	2
16.6472	4.30787	1.06011	24.2404	153.199	0	2
21.2195	4.25743	1.04769	28.7145	113.844	0	2
16.5422	4.80723	1.18299	28.259	54.997	0	2
18.9721	4.65325	1.1451	33.2105	70.4005	0	2
16.7729	3.66562	0.902057	28.8517	72.0928	0	2
17.4805	2.73902	0.674036	36.4341	21.4092	0	2
17.7275	3.52174	0.866651	28.7797	102.279	0	2
20.9598	4.21755	1.03788	35.6179	54.7917	0	2
18.2115	3.57699	0.880249	32.4527	28.3691	0	2
19.1964	3.39583	0.835668	39.4048	28.3202	0	2
17.237	4.05195	0.997128	27.5487	99.96	0	2
17.0954	4.40722	1.08456	25.3892	142.46	0	2
18.4917	3.36643	0.828432	27.3759	126.441	0	2
14.834	3.72973	0.917835	21.9691	191.065	0	2
20.9279	4.56757	1.12402	36.9207	47.6303	0	2
18.3006	4.19653	1.03271	27.3642	99.3498	0	2
17.6904	4.24932	1.0457	25.4767	183.502	0	2
20.0851	4.69149	1.15451	25.3723	119.166	0	2
16.6851	3.72837	0.917499	29.6659	51.931	0	2
17.5815	4.13509	1.01759	34.229	5.80992	0	2
21.509	4.25676	1.04753	34.1464	133.559	0	2
15.3404	4.16312	1.02449	22.273	179.146	0	2
19.4683	4.5733	1.12543	29.3085	110.194	0	2
15.7912	3.44322	0.84733	24.2857	183.483	0	2
18.6272	3.64035	0.89584	27.6754	143.179	0	2
26.7474	4.23947	1.04328	50.6684	65.249	0	2
19.5881	3.71343	0.913824	26.6179	126.96	0	2
15.6135	3.75764	0.924704	35.1594	9.28019	0	2
27.4296	4.94957	1.21802	41.4661	69.9723	0	2
24.1523	3.76142	0.925634	39.1751	92.0295	0	2
15.9107	3.10459	0.763997	32.7704	24.5177	0	2
14.6113	3.63477	0.894466	36.6816	6.24157	0	2
22.5912	3.84459	0.946102	65.0439	49.697	0	2
13.1274	3.47115	0.854203	28.6635	14.9947	0	2
16.0663	4.19133	1.03143	25.2015	136.564	0	2
16.469	3.57011	0.878556	29.5425	56.2225	0	2
14.4602	3.4653	0.852761	27.3033	48.6212	0	2
16.6258	3.76129	0.925602	27.8366	53.1097	0	2
13.6986	2.56849	0.632071	30.7158	35.4596	0	2
13.6236	3.50824	0.86333	33.3077	12.9245	0	2
15.9775	2.94944	0.725816	40.2022	30.8671	0	2
19.9555	4.04049	0.994308	33.6032	92.3211	0	2
15.3639	3.70278	0.911202	25.1083	53.9947	0	2
16.5952	3.34921	0.824193	41.2857	31.9672	0	2
17.134	4.20619	1.03508	30.9923	48.5522	0	2
16.099	3.45048	0.849115	25.1534	105.436	0	2
17.3972	3.54722	0.872922	28.3194	91.6141	0	2
19.2193	4.34016	1.06805	34.0697	79.9181	0	2
14.2006	2.92264	0.71922	23.7794	78.5665	0	2
53.1995	22.9852	5.12368	37.2908	99.2456	1	3
71.503	10.5919	2.36107	34.0202	104.976	1	3
63.3157	11.0193	2.45633	36.7446	101.938	1	3
79.0167	13.7908	3.07414	34.2678	148.273	1	3
62.2494	8.91944	1.98825	36.8389	102.989	1	3
92.1613	22.3794	4.98865	41.0031	97.513	1	3
54.351	6.10265	1.36036	30.5414	187.378	1	3
17.7669	7.62431	1.69955	41.0674	211.26	0	3
19.9837	6.56281	1.46293	45.646	215.23	0	3
15.1053	7.43301	1.65691	36.9402	210.704	0	3
17.5702	6.07645	1.35451	40.9298	214.489	0	3
14.797	5.15758	1.14969	33.0182	207.855	0	3
15.167	4.21842	0.940336	40.3405	190.87	0	3
18.6264	7.78371	1.73508	44.5197	214.678	0	3
16.5587	5.37011	1.19706	36.2918	209.107	0	3
20.0612	6.89286	1.5365	49.4235	209.552	0	3
14.7222	4.51496	1.00644	33.4274	193.036	0	3
19.9059	6.86881	1.53114	43.3688	205.691	0	3
18.7673	5.89976	1.31513	41.4654	200.989	0	3
15.5777	5.32572	1.18717	30.5083	201.384	0	3
14.7128	3.5235	0.785431	34.3864	177.631	0	3
17.6223	6.2291	1.38854	45.1022	207.939	0	3
16.432	5.06949	1.13005	31.3384	207.734	0	3
16.1199	6.79012	1.5136	33.4056	201.951	0	3
21.3636	6.14256	1.36925	47.7004	205.7	0	3
15.9006	5.07099	1.13039	33.2576	201.142	0	3
16.949	5.12379	1.14215	38.1796	202.64	0	3
16.1943	7.42857	1.65592	36.7276	192.392	0	3
16.5808	4.16495	0.928418	40.4845	180.685	0	3
19.8729	6.49448	1.4477	47.8674	194.499	0	3
16.1115	3.14047	0.700049	46.2709	172.854	0	3
15.6908	5.05292	1.12636	36.9331	194.034	0	3
18.752	5.38408	1.20018	35.9689	194.07	0	3
16.5321	6.44037	1.43564	34.0367	190.303	0	3
17.1319	3.95992	0.882714	36.3175	182.922	0	3
13.102	2.69154	0.599978	28.4055	157.523	0	3
17.3766	5.52092	1.23068	39.7908	191.85	0	3
17.2379	3.8629	0.861088	46.5645	162.577	0	3
17.9318	5.06825	1.12977	38.9852	187.189	0	3
18.3044	4.8347	1.07771	49.527	180.668	0	3
18.4175	3.81715	0.85089	43.8657	169.946	0	3
19.693	5.11514	1.14023	40.9446	189.048	0	3
17.3525	4.54797	1.0138	39.625	174.291	0	3
22.357	6.64297	1.4808	48.6893	182.99	0	3
17.3456	4.58357	1.02173	37.8782	176.221	0	3
16.5206	5.04938	1.12557	35.5967	184.28	0	3
17.5568	4.25946	0.949486	48.8514	168.701	0	3
16.0904	6.67406	1.48773	36.0017	173.86	0	3
16.2496	3.57504	0.796919	45.2957	150.418	0	3
17.1994	5.59969	1.24824	37.4361	181.809	0	3
22.2881	5.18881	1.15665	66.3147	168.399	0	3
17.854	4.84929	1.08097	39.654	177.909	0	3
17.655	4.85757	1.08281	34.0022	171.228	0	3
18.3271	4.43968	0.989659	37.4638	177.82	0	3
16.9802	6.25743	1.39486	39.6609	173.008	0	3
17.2557	3.10046	0.69113	55.4551	155.689	0	3
17.544	5.13212	1.14401	37.5544	173.375	0	3
17.8156	3.93253	0.87661	49.1664	158.918	0	3
18.9172	5.46066	1.21725	46.7257	165.577	0	3
14.9753	4.32366	0.963796	44.6909	145.186	0	3
17.76	4.92444	1.09772	41.4498	170.68	0	3
13.3746	3.10036	0.691108	38.7688	131.896	0	3
16.8723	3.3126	0.73842	56.7627	158.481	0	3
19.2853	5.31497	1.18477	45.8418	164.361	0	3
16.1657	3.57735	0.797435	41.3066	138.457	0	3
17.7506	4.19154	0.934345	45.6303	145.636	0	3
18.4467	6.05634	1.35003	44.0845	163.404	0	3
16.7687	6.03161	1.34452	43.8735	163.2	0	3
17.7067	4.49441	1.00186	53.905	145.885	0	3
17.2898	7.51429	1.67503	45.2735	156.858	0	3
16.0747	3.71084	0.827192	43.9205	128.662	0	3
19.3458	4.70707	1.04926	49.0078	147.407	0	3
20.9951	5.50739	1.22766	43.3867	156.431	0	3
20.1016	5.38513	1.20041	41.01	156.174	0	3
20.1333	6.43238	1.43386	49.6838	155.714	0	3
15.3153	3.76471	0.839199	43.7012	118.819	0	3
18.7899	4.38462	0.977384	45.5872	147.621	0	3
18.5111	6.97274	1.55431	49.5826	149.937	0	3
17.0157	4.03403	0.899235	42.0982	125.162	0	3
18.1122	3.75062	0.83606	41.3915	132.335	0	3
18.9049	6.83655	1.52395	42.5483	143.037	0	3
17.782	4.56711	1.01806	44.7883	135.908	0	3
18.6142	4.19178	0.934399	44.363	150.581	0	3
18.4755	6.86531	1.53036	48.6041	147.327	0	3
16.2869	3.55837	0.793204	49.1828	131.71	0	3
18.94	4.71821	1.05175	47.737	142.737	0	3
17.9635	4.3382	0.967038	39.3528	118.455	0	3
17.661	6.62147	1.47601	44.1469	136.382	0	3
16.5657	3.94366	0.87909	45.4977	106.659	0	3
18.9314	5.60061	1.24844	48.0762	145.19	0	3
18.8734	4.28329	0.954798	54.1645	139.666	0	3
18.8867	5.16585	1.15153	48.6847	134.436	0	3
19.2383	5.89755	1.31464	48.0601	143.82	0	3
18.8836	6.15008	1.37093	45.0388	136.806	0	3
19.0251	4.18922	0.933829	49.1404	121.372	0	3
16.9849	4.15385	0.925943	51.1371	109.506	0	3
21.0465	5.53453	1.23372	51.5045	132.356	0	3
15.8921	3.66667	0.817345	46.3016	100.623	0	3
17.5789	4.18684	0.933298	41.9763	134.3	0	3
19.3196	6.82405	1.52116	60.695	132.104	0	3
17.855	4.45868	0.993895	49.5295	132.94	0	3
20.6077	5.75857	1.28366	53.8272	126.763	0	3
20.435	5.51762	1.22994	46.878	131.636	0	3
20.2766	4.70558	1.04893	44.5279	122.678	0	3
20.3228	6.75566	1.50592	46.9276	127.126	0	3
20.6486	5.24775	1.16979	47.3799	130.231	0	3
18.9936	4.13323	0.921347	51.0594	108.289	0	3
20.5732	4.73011	1.0544	51.7888	112.893	0	3
18.6392	4.42131	0.985563	43.1316	121.639	0	3
19.9334	4.33901	0.967218	53.9582	112.357	0	3
22.1587	5.30508	1.18257	52.9723	121.38	0	3
17.5856	3.37593	0.752536	45.6861	104.778	0	3
19.1419	4.12726	0.920016	50.7678	93.2815	0	3
20.6888	5.47902	1.22134	56.3883	118.478	0	3
21.306	6.17156	1.37572	46.2535	109.778	0	3
21.4266	4.49825	1.00272	54.1101	111.604	0	3
20.5655	5.58444	1.24484	64.6034	97.411	0	3
18.9948	5.21484	1.16245	47.0898	113.114	0	3
11.9826	2.37441	0.529284	35.7536	75.9852	0	3
19.7035	6.17829	1.37722	55.9961	102.25	0	3
21.939	5.23984	1.16802	60.0935	111.947	0	3
20.1372	5.77778	1.28794	51.8134	111.255	0	3
20.4821	4.13383	0.92148	45.627	90.0461	0	3
22.2727	5.90909	1.31721	50.4809	109.14	0	3
21.2706	4.67345	1.04177	56.9237	97.6268	0	3
22.0102	5.86284	1.3069	50.5058	104.155	0	3
20.212	4.21291	0.93911	54.877	75.5045	0	3
20.9667	4.73397	1.05526	50.0143	104.191	0	3
24.5459	7.94049	1.77003	59.555	104.262	0	3
22.1165	6.05545	1.34983	59.3956	100.695	0	3
19.1111	5.12057	1.14144	46.1383	104.04	0	3
18.2551	4.24829	0.946996	46.9499	79.0271	0	3
18.1796	5.38124	1.19954	62.8503	85.7562	0	3
20.5692	5.27231	1.17526	53.5831	87.0958	0	3
16.1951	5.06278	1.12856	47.0561	95.5539	0	3
16.086	3.38347	0.754217	44.076	51.5871	0	3
15.8264	3.58159	0.79838	40.4498	56.5106	0	3
19.8017	3.89346	0.8679	49.2616	66.0073	0	3
22.2196	5.56528	1.24057	46.6484	95.88	0	3
19.1142	4.48951	1.00077	51.028	74.4033	0	3
21.7066	3.72201	0.829681	77.5907	86.4483	0	3
21.7266	7.58349	1.69045	66.8679	88.2691	0	3
19.7359	6.97405	1.5546	54.0305	91.616	0	3
21.5054	5.69286	1.26901	63.3518	89.9639	0	3
21.9452	6.32584	1.41011	47.9916	89.5802	0	3
19.9863	4.19126	0.934282	52.2842	65.5424	0	3
16.1267	3.80349	0.847844	44.0651	41.0218	0	3
20.9241	5.99096	1.33546	65.1863	73.8184	0	3
25.6957	5.10048	1.13696	63.2603	76.6932	0	3
23.5073	4.39742	0.980238	80.0711	88.06	0	3
19.7396	4.07639	0.908677	56.6806	54.2862	0	3
22.7314	5.86335	1.30701	54.1661	85.34	0	3
17.75	3.51199	0.782865	47.0171	42.5544	0	3
19.9038	3.36538	0.750185	67.6308	61.6188	0	3
14.7922	3.00742	0.670391	43.6865	58.0694	0	3
16.9949	2.99229	0.667018	62.9923	63.3943	0	3
21.4946	5.37634	1.19845	55.6031	76.94	0	3
14.8574	2.37475	0.52936	35.2811	29.5252	0	3
20.1065	6.25049	1.39331	54.2229	79.795	0	3
22.042	6.00407	1.33838	51.248	78.4664	0	3
17.8049	4.32649	0.964427	47.6591	67.9524	0	3
21.2154	5.36308	1.1955	56.1938	71.2233	0	3
19.4639	4.47791	0.998181	58.6807	44.7265	0	3
19.72	4.27784	0.953582	47.6267	49.7517	0	3
24.0468	5.37441	1.19802	60.9938	60.5324	0	3
16.1289	2.7494	0.612876	56.463	35.1041	0	3
18.1251	4.41307	0.983727	50.8405	53.7695	0	3
21.1254	6.85604	1.52829	61.3065	74.6345	0	3
21.6716	6.46766	1.44172	53.1928	74.12	0	3
19.104	4.16389	0.928183	44.297	48.0111	0	3
25.1037	5.89862	1.31487	62.1014	66.6478	0	3
15.9209	2.84746	0.634733	54.8983	32.9116	0	3
17.52	4.08833	0.911339	48.3033	53.6823	0	3
18.3747	3.85224	0.858712	59.1544	59.535	0	3
21.5235	6.59914	1.47103	51.2596	65.3508	0	3
22.6589	5.25205	1.17075	51.7301	66.8003	0	3
24.0609	6.53966	1.45777	51.0793	68.0306	0	3
16.7028	4.47791	0.998181	44.8755	40.1041	0	3
17.4754	4.50535	1.0043	63.636	54.1711	0	3
25.2696	6.60326	1.47195	62.6378	56.0918	0	3
15.2449	4.66966	1.04092	42.573	22.3729	0	3
24.4212	5.89819	1.31478	67.4017	42.149	0	3
21.4139	5.87717	1.31009	51.0494	60.276	0	3
18.99	4.72591	1.05346	48.1495	43.4376	0	3
18.0191	5.29043	1.1793	52.9513	34.6233	0	3
16.6383	4.05929	0.904865	41.6304	26.3407	0	3
22.0021	6.03942	1.34626	53.4813	52.8588	0	3
21.4236	8.17516	1.82234	51.4952	53.2162	0	3
23.5988	6.79012	1.5136	54.7519	53.9015	0	3
22.7222	5.4078	1.20546	54.8457	43.1157	0	3
23.7681	5.54454	1.23595	50.8185	50.9773	0	3
24.3539	6.56393	1.46318	60.8174	52.02	0	3
24.6784	7.52371	1.67713	58.0433	52.02	0	3
12.5675	3	0.668737	31.6549	13.8067	0	3
20.0441	4.81206	1.07267	48.1415	31.3188	0	3
17.0348	4.51739	1.00698	47.0376	19.7815	0	3
20.3858	4.75872	1.06078	50.0897	20.948	0	3
23.9001	6.52988	1.45559	52.5423	46.58	0	3
21.0083	4.58444	1.02193	46.3916	41.0049	0	3
19.8166	6.75548	1.50588	46.0888	41.4814	0	3
19.8406	4.4576	0.993654	47.1879	34.2996	0	3
16.2916	3.34217	0.74501	56.6602	22.4735	0	3
21.4322	5.07692	1.13171	59.1316	39.8091	0	3
17.196	3.29901	0.73539	47.0957	25.6987	0	3
22.149	4.87648	1.08703	47.0827	33.3477	0	3
21.7451	3.57871	0.797738	54.9475	15.4204	0	3
22.4449	5.51711	1.22983	54.052	37.4556	0	3
13.15	3.94038	0.87836	40.3462	3.66191	0	3
18.2328	3.4133	0.760867	55.8884	24.4067	0	3
18.9745	5.29799	1.18099	47.1396	29.8968	0	3
17.3201	3.29529	0.734559	59.5533	23.4427	0	3
21.7298	5.95707	1.3279	56.8333	22.1861	0	3
21.5505	6.10436	1.36074	50.531	25.4887	0	3
15.1297	3.14715	0.701539	38.8394	5.05446	0	3
19.9948	6.33972	1.4132	45.4895	24.1496	0	3
21.2993	4.5007	1.00326	51.4322	17.8135	0	3
20.2847	5.34054	1.19047	55.5045	19.0673	0	3
17.6556	4.89549	1.09126	43.9074	12.92	0	3
18.0504	4.65827	1.03839	43.7122	216.679	0	3
16.6208	4.39777	0.980317	41.9405	211.851	0	3
15.447	2.77391	0.618339	49.353	184.27	0	3
20.1079	5.96629	1.32996	42.2202	191.925	0	3
14.2725	4.67536	1.0422	28.087	197.506	0	3
15	4.38242	0.976896	35.734	191.49	0	3
12.5403	2.20161	0.490766	29.9067	164.561	0	3
20.7468	5.76259	1.28455	39.5079	197.306	0	3
19.4116	5.9558	1.32762	40.9199	195.16	0	3
15.5191	5.57656	1.24308	34.0789	191.624	0	3
17.2096	6.53061	1.45575	34.7792	188.71	0	3
13.5057	4.0431	0.901257	28.5833	183.559	0	3
20.4402	5.29008	1.17922	45.3817	186.113	0	3
13.7276	3.52033	0.784724	35.4715	161.338	0	3
17.9835	3.63985	0.811368	51.7642	185.64	0	3
17.4541	5.19856	1.15882	35.1608	178.058	0	3
15.227	2.87604	0.641105	44.8189	163.682	0	3
17.5845	3.79223	0.845334	46.2483	169.825	0	3
19.5275	5.39511	1.20264	48.611	173.964	0	3
14.0106	2.79646	0.623365	34.4513	135.479	0	3
19.0067	5.27517	1.1759	39.3742	176.265	0	3
17.7111	5.20417	1.16007	38.5903	172.632	0	3
16.096	4.16949	0.929431	37.2957	152.021	0	3
11.1335	1.87406	0.41775	26.728	126.357	0	3
20.9621	4.77368	1.06411	42.3179	168.305	0	3
17.0972	5.65404	1.26035	36.7381	164.042	0	3
11.0662	2.06457	0.460218	30.1805	119.215	0	3
17.4378	3.51813	0.784235	53.0803	158.988	0	3
16.8411	4.14993	0.925069	39.7361	140.762	0	3
18.8172	5.36256	1.19538	46.2333	151.815	0	3
16.0215	5.47633	1.22074	39.4419	156.069	0	3
16.8241	3.25126	0.724745	49.1181	147.278	0	3
16.4886	3.66919	0.817908	43.3359	113.638	0	3
20.2474	4.27003	0.951843	50.203	121.823	0	3
19.4957	5.23216	1.16631	42.6565	138.562	0	3
21.7945	5.78669	1.28992	53.3405	128.376	0	3
14.9832	2.8099	0.626361	40.8614	139.363	0	3
18.1729	5.2974	1.18085	37.632	132.061	0	3
16.3819	2.84028	0.633133	47.6076	117.316	0	3
17.2176	3.728	0.831017	43.7824	102.2	0	3
19.9476	4.92027	1.09679	46.9852	120.32	0	3
18.8114	5.3222	1.18638	46.7629	124.754	0	3
20.3492	3.71231	0.827519	48.5631	100.703	0	3
20.538	3.42935	0.764444	45.6739	87.1522	0	3
17.2129	5.98315	1.33372	42.2098	112.022	0	3
20.594	5.32852	1.18779	50.0092	117.397	0	3
20.0953	4.40118	0.981076	51.1376	118.32	0	3
19.0772	5.98148	1.33335	45.4151	113.843	0	3
18.9462	3.91304	0.872265	49.7702	84.6218	0	3
19.1946	4.68719	1.04483	48.9002	91.8504	0	3
16.4253	4.06854	0.906928	41.6678	101.712	0	3
16.254	3.37037	0.751297	42.2995	66.5992	0	3
18.8796	4.04651	0.902017	48.8044	80.2429	0	3
19.5522	6.11949	1.36411	43.094	99.7354	0	3
18.6358	3.64388	0.812266	49.7094	86.9822	0	3
22.8981	4.5695	1.0186	57.1424	96.3934	0	3
19.7079	4.45238	0.99249	47.0841	70.209	0	3
18.3304	4.37688	0.975661	45.9309	76.2851	0	3
17.6024	3.59443	0.801243	42.8787	57.3482	0	3
19.4486	4.97627	1.10927	45.1605	90.7214	0	3
19.5657	5.25748	1.17196	48.3225	80.3156	0	3
21.795	5.29243	1.17975	49.705	81.5185	0	3
19.0815	4.18528	0.932951	44.565	66.1053	0	3
19.9297	4.74668	1.05809	45.9523	73.8646	0	3
20.4005	4.94089	1.10139	52.9228	66.2311	0	3
15.9353	2.62762	0.585729	38.4773	22.1392	0	3
19.612	4.24311	0.945841	43.5307	62.1047	0	3
23.9676	5.92023	1.31969	53.4012	66.2128	0	3
21.0055	5.82806	1.29915	55.5543	64.26	0	3
20.7949	6.39618	1.42579	49.251	57.9688	0	3
17.8401	4.46125	0.994468	42.6039	34.6016	0	3
23.5182	4.40099	0.981034	53.4356	51.98	0	3
20.5022	5.46898	1.2191	51.7532	57.2786	0	3
15.2604	3.51195	0.782857	42.3245	10.2	0	3
21.9356	6.7863	1.51275	48.9233	51.6979	0	3
17.6304	2.98641	0.665708	58.7038	24.5177	0	3
18.3702	3.64516	0.812551	55.2857	39.7466	0	3
16.5214	3.67714	0.81968	39.8029	11.1165	0	3
21.7009	5.43252	1.21097	49.146	38.1346	0	3
29.8757	7.58683	1.6912	59.9536	38.76	0	3
27.2203	5.59579	1.24737	59.5402	37.7951	0	3
17.2342	4.16891	0.9293	42.3301	9.03402	0	3
17.0373	3.86872	0.862385	37.4895	13.4504	0	3
18.9968	4.34236	0.967964	45.379	21.8263	0	3
19.9322	4.71405	1.05082	44.8231	27.2785	0	3
22.9394	5.58612	1.24522	47.2464	27.88	0	3
15.8571	3.88265	0.865491	37.5731	7.00928	0	3
17.8414	3.79194	0.845269	53.5878	18.4385	0	3
17.8376	4.2094	0.938328	41.6223	3.22552	0	3
15.2921	3.81542	0.850503	43.3347	12.4692	0	3
14.715	4.28836	0.955929	38.5059	8.60811	0	3
13.9848	4.17656	0.931006	33.9848	4.13628	0	3
22.8967	6.43098	1.43354	39.1496	211.128	0	3
17.8251	6.26714	1.39702	36.8936	208.413	0	3
15.095	3.70495	0.825879	28.7109	195.507	0	3
19.9969	5.3792	1.19909	36.7355	205.36	0	3
15.8571	4.46173	0.994575	29.5587	198.328	0	3
17.0761	6.21239	1.38482	35.1575	188.394	0	3
16.1721	3.7093	0.826849	34.2721	178.997	0	3
18.417	6.11938	1.36408	33.7197	194.823	0	3
17.0597	5.21818	1.1632	36.4701	192.049	0	3
18.3589	4.18744	0.933431	46.5603	158.708	0	3
14.7808	3.39779	0.757409	35.5856	140.397	0	3
12.9403	3.33438	0.743274	41.7316	132.139	0	3
17.3992	4.49383	1.00173	44.9314	146.77	0	3
16.5548	2.97042	0.662144	44.1775	130.562	0	3
17.9377	4.85849	1.08302	43.6925	142.891	0	3
11.3703	2.03207	0.452973	28.3892	106.866	0	3
18.5925	3.66792	0.817625	48.3421	146.042	0	3
20.0305	4.11603	0.917514	46.8718	128.698	0	3
17.5918	4.96122	1.10592	42.7429	144.5	0	3
16.4856	3.36439	0.749963	36.7568	133.103	0	3
18.6623	5.70418	1.27153	39.254	132.898	0	3
20.8483	4.8396	1.0788	45.3714	132.187	0	3
16.9964	3.25581	0.725761	43.3792	108.873	0	3
15.4565	3.96488	0.883821	37.2057	120.364	0	3
17.6828	4.36207	0.972359	40.7943	122.134	0	3
16.4915	3.14103	0.700173	39.9156	91.4657	0	3
18.5948	4.22744	0.942348	40.9153	124.559	0	3
20.1728	4.53972	1.01196	46.9294	102.787	0	3
19.5599	3.76507	0.839281	46.1629	108.701	0	3
18.0745	4.11624	0.917561	45.1505	98.5936	0	3
16.2599	3.22533	0.718965	39.9605	82.1429	0	3
17.5312	3.52425	0.785598	45.7367	102.68	0	3
20.1373	4.12211	0.918869	48.0947	84.8809	0	3
17.6769	3.53351	0.787663	42.3566	51.0045	0	3
22.6705	5.47545	1.22055	55.1395	86.4429	0	3
18.8617	4.07349	0.90803	52.8458	63.3286	0	3
22.7022	5.69252	1.26893	54.7618	86.7	0	3
15.0965	3.63388	0.810036	42.8834	74.0248	0	3
22.284	5.66218	1.26217	50.2852	80.58	0	3
19.5127	3.83263	0.854339	42.2309	42.5326	0	3
20.342	5.84561	1.30306	43.4703	73.4471	0	3
25.0206	6.6933	1.49202	56.6289	72.3689	0	3
16.9582	3.32616	0.741443	35.9462	35.8341	0	3
18.1174	4.14884	0.924827	44.7	49.79	0	3
15.5517	2.75835	0.614869	34.6741	25.2449	0	3
20.1608	3.10723	0.69264	60.485	36.996	0	3
15.4616	3.25181	0.724868	35.5195	22.8206	0	3
19.5955	4.96466	1.10668	48.2408	37.74	0	3
15.9031	3.24063	0.722375	36.2203	11.6992	0	3
20.0025	4.60809	1.0272	42.0367	48.6212	0	3
18.8048	4.02515	0.897255	42.4719	28.2773	0	3
14.9949	3.4983	0.779814	34.835	12.2589	0	3
18.1265	4.14671	0.924353	48.0641	0.961665	0	3
22.6304	5.35407	1.19349	47.2428	37.4	0	3
19.5594	4.45905	0.993978	44.3276	19.9994	0	3
17.3396	4.5529	1.0149	47.4608	7.84951	0	3
19.9489	4.2862	0.955447	42.5877	17.8135	0	3
28.4803	5.99745	1.33691	55.4255	17.68	0	3
15.8064	3.8186	0.851212	36.6768	10.402	0	3
17.2194	4.09705	0.913282	48.1983	2.40416	0	3
15.2099	3.26232	0.727211	38.7981	199.406	0	3
19.5213	5.23256	1.1664	42.4186	193.601	0	3
17.8278	5.117	1.14064	34.4746	194.752	0	3
16.3997	3.97347	0.885734	31.1493	183.749	0	3
19.487	4.88416	1.08874	40.8345	185.405	0	3
15.0823	2.94087	0.655557	36.3535	155.321	0	3
17.8988	4.69028	1.04552	37.8684	184.305	0	3
12.7459	2.0044	0.446805	33.1617	146.943	0	3
16.0345	3.68921	0.82237	36.0518	158.824	0	3
15.4432	3.91136	0.871889	35.2604	165.149	0	3
17.322	4.18717	0.933372	36.6623	157.406	0	3
17.1151	4.85197	1.08156	43.6546	160.659	0	3
15.2445	3.14433	0.70091	36.7761	121.042	0	3
16.3244	3.30792	0.737376	37.0329	132.146	0	3
11.2548	1.61401	0.359783	28.1745	98.4334	0	3
16.0872	2.76239	0.615771	39.1726	101.617	0	3
17.1619	4.32276	0.963597	37.4394	128.312	0	3
14.4006	2.70442	0.602848	51.1851	114.63	0	3
20.3172	5.05416	1.12663	42.1992	128.18	0	3
15.4277	3.16934	0.706485	44.6818	121.159	0	3
19.6058	3.96995	0.884951	42.0252	120.36	0	3
18.7978	5.1489	1.14775	44.4498	101.742	0	3
18.8922	4.64908	1.03634	47.2775	107.022	0	3
17.7411	3.62234	0.807464	44.5957	84.7248	0	3
17.5588	4.0249	0.897199	41.2531	70.9045	0	3
17.4685	3.33901	0.744307	40.9642	76.3677	0	3
18.7562	3.50766	0.781899	46.7868	60.2961	0	3
13.3849	2.30114	0.512951	30.5369	33.1339	0	3
19.4592	3.67107	0.818326	43.7281	68.4676	0	3
22.5693	4.11656	0.917633	46.6245	54.4106	0	3
16.4231	3.78605	0.843958	37.4517	19.956	0	3
17.3131	4.09878	0.913669	37.8435	29.5546	0	3
20.8964	5.65777	1.26119	50.2261	52.6111	0	3
18.1156	4.05442	0.90378	43.4054	29.5233	0	3
17.5595	4.35884	0.97164	39.8129	46.7299	0	3
20.3197	6.72814	1.49979	41.7391	34.9423	0	3
18.628	4.61186	1.02804	56.1294	3.4	0	3
16.9132	5.09222	1.13512	33.3436	203.944	0	3
14.8801	4.50097	1.00332	33.8085	183.536	0	3
14.6208	4.03636	0.899755	29.6753	188.661	0	3
14.227	2.66796	0.594722	35.358	172.517	0	3
15.8489	4.35149	0.970001	32.5624	181.167	0	3
19.1416	6.31161	1.40694	40.5958	178.839	0	3
18.8822	4.54386	1.01288	40.0777	171.207	0	3
16.6437	4.88419	1.08875	40.2272	172.783	0	3
13.0448	2.47658	0.55206	30.7719	140.356	0	3
15.4234	3.75837	0.837787	38.6005	144.985	0	3
16.3506	4.38905	0.978374	37.9586	159.12	0	3
19.4896	4.79215	1.06823	44.9977	144.373	0	3
18.8011	4.67563	1.04225	45.3961	155.833	0	3
15.3289	3.34218	0.745012	38.5729	143.772	0	3
19.1406	3.79576	0.84612	40.3806	140.956	0	3
18.2788	4.4988	1.00284	40.1274	123.76	0	3
18.1071	3.81428	0.850249	41.9621	107.78	0	3
18.3083	4.68584	1.04453	44.9749	79.4422	0	3
18.7734	3.7238	0.83008	46.5326	60.2482	0	3
17.3601	3.11087	0.693451	42.2101	53.8275	0	3
16.7823	3.27286	0.72956	40.0479	42.8697	0	3
18.105	3.23	0.720006	57.5925	63.9525	0	3
17.1133	3.4486	0.768735	39.2383	47.9533	0	3
16.297	2.6679	0.594707	44.7768	33.5292	0	3
19.1325	4.07726	0.908872	40.3256	19.7844	0	3
17.8427	3.35333	0.747499	52.5773	20.74	0	3
17.5524	3.53388	0.787745	42.4764	3.46733	0	3
15.279	3.92908	0.87584	26.9196	194.034	0	3
15.4924	4.32523	0.964146	35.5836	169.987	0	3
17.7556	4.78055	1.06564	38.6085	168.185	0	3
15.1294	3.04471	0.678702	32.76	151.886	0	3
17.1264	3.46208	0.77174	37.9101	139.133	0	3
13.2076	2.31886	0.516902	33.791	125.456	0	3
13.8065	3.86804	0.862232	32.0938	155.303	0	3
16.6351	3.02432	0.674159	38.6676	150.463	0	3
16.2846	3.88512	0.86604	36.6997	146.317	0	3
16.0574	3.97389	0.885829	37.4099	132.402	0	3
14.7622	2.85082	0.635482	39.4429	108.962	0	3
18.5603	3.4296	0.764499	46.2328	79.6711	0	3
19.4685	4.25189	0.947798	43.5668	86.9151	0	3
16.0817	3.05799	0.681663	37.5408	53.3746	0	3
16.8451	2.95525	0.658761	39.5267	78.59	0	3
17.6947	4.02513	0.89725	40.5967	33.2018	0	3
17.5938	3.82738	0.85317	41.5164	51.1946	0	3
16.8211	3.52846	0.786536	67.0366	56.78	0	3
22.7237	3.59356	0.801048	44.8203	5.32184	0	3
15.7211	2.78748	0.621363	37.4687	14.1988	0	3
16.4413	2.74621	0.612164	37.5284	7.60263	0	3
16.5046	2.69429	0.60059	37.6703	6.35172	0	3
17.328	3.59486	0.801337	33.717	5.14513	0	3
16.1729	3.40294	0.758556	31.5775	185.426	0	3
12.3845	2.43689	0.543213	27.6097	168.249	0	3
16.9968	2.91351	0.649458	40.16	147.264	0	3
13.8163	3.2585	0.72636	35.3605	153.885	0	3
19.1318	4.05412	0.903712	41.1365	147.042	0	3
14.7493	3.38903	0.755457	37.8956	149.926	0	3
15.431	3.25634	0.725878	42.3887	119.581	0	3
15.8627	3.43338	0.765342	44.4334	115.713	0	3
15.9371	2.8707	0.639914	42.4104	91.3487	0	3
18.3567	3.79649	0.846284	40.076	37.2762	0	3
14.854	3.20302	0.713992	32.4144	6.45105	0	3
15.8996	2.57322	0.573603	42.5607	12.0496	0	3
18.3115	2.9267	0.652398	46.9843	12.6533	0	3
15.1414	3.96296	0.883393	31.7441	212.976	0	3
13.5169	2.98305	0.664959	31.0763	168.396	0	3
15.265	3.04832	0.679507	40.224	152.691	0	3
16.1427	2.78184	0.620106	39.8785	98.5754	0	3
16.4457	3.26244	0.727239	37.9389	110.838	0	3
14.8521	2.65976	0.592894	37.9127	74.2042	0	3
17.5176	5.14265	1.14636	42.7309	53.2238	0	3
22.4624	4.69041	1.04555	46.2617	53.0411	0	3
17.5821	3.19226	0.711593	47.7917	18.2019	0	3
17.5311	3.02073	0.673357	47.6477	7.9592	0	3
17.9447	2.96809	0.661622	39.5	14.0062	0	3
13.5431	4.65191	1.03697	33.4952	210.626	0	3
14.4552	3.83582	0.855051	33.1045	181.767	0	3
14.6845	2.67718	0.596777	28.7573	157.97	0	3
16.9153	3.45763	0.770747	36.1158	160.435	0	3
13.9266	3.09511	0.689938	32.4728	113.861	0	3
16.2822	3.20859	0.715234	36.998	72.4846	0	3
15.9249	6.0929	1.35818	35.4508	177.131	0	3
11.4669	2.52265	0.562329	30.6829	172.04	0	3
14.8829	2.67267	0.595771	36.4204	155.793	0	3
16.203	6.35016	1.41553	40.8088	148.409	0	3
15.7537	10.2881	2.29333	37.5418	125.556	0	3
17.7405	2.85011	0.635325	49.481	102.894	0	3
13.3916	10.98	2.44757	35.7523	99.202	0	3
12.4371	6.21942	1.38639	36.9748	85.3644	0	3
16.2135	8.59176	1.91521	41.867	81.171	0	3
16.3924	6.72943	1.50007	38.6282	58.7049	0	3
15.8346	5.06735	1.12957	35.5827	36.7766	0	3
17.5852	6.3212	1.40907	38.9298	28.8219	0	3
15.2548	5.27869	1.17668	37.851	34.6683	0	3
53.5657	50.3501	10.9584	45.6263	2.45177	1	4
57.8233	42.9572	9.34935	46.5177	2.40416	1	4
52.4251	43.9631	9.56828	47.5702	12.9245	1	4
49.0938	9.69743	2.11058	59.3654	50.0551	1	4
94.2082	60.1656	13.0946	46.5379	6.56649	1	4
70.3405	20.6282	4.48959	66.4321	39.5994	1	4
74.8153	47.0682	10.2441	52.081	28.8058	1	4
76.6738	40.8273	8.88578	55.71	33.5706	1	4
87.1437	15.0529	3.27617	51.5406	68.4676	1	4
65.748	17.4282	3.79313	51.6403	38.6241	1	4
97.0608	13.1494	2.86187	52.4785	72.3042	1	4
82.0839	63.7518	13.8751	47.4357	14.1499	1	4
78.3048	14.1353	3.07645	47.6815	65.202	1	4
88.3157	45.3266	9.86502	45.689	14.9019	1	4
108.488	39.2119	8.5342	52.169	20.9838	1	4
74.2991	28.8278	6.27417	51.7251	39.8265	1	4
90.9552	10.7339	2.33616	45.7395	80.1275	1	4
104.311	28.3444	6.16897	43.0245	35.2831	1	4
61.1507	4.66312	1.0149	54.1596	75.8756	1	4
88.319	98.047	21.3393	40.9018	5.17873	1	4
138.129	69.7763	15.1863	46.1636	3.66191	1	4
143.576	68.0838	14.818	45.7377	10.474	1	4
62.4225	6.6693	1.45153	42.4541	79.3687	1	4
113.82	46.9631	10.2212	65.1412	26.0228	1	4
101.829	84.0343	18.2895	43.989	3.84666	1	4
90.9421	60.3561	13.1361	41.3858	14.0186	1	4
66.7166	47.4349	10.3239	44.9768	23.105	1	4
73.4034	34.4443	7.49656	50.6643	29.6483	1	4
55.3848	3.96733	0.863463	39.6751	67.6805	1	4
91.9207	21.9686	4.78131	56.8645	42.2709	1	4
112.272	30.3294	6.60098	43.6963	42.8049	1	4
83.2366	10.4698	2.27867	48.6632	76.666	1	4
55.4716	3.62399	0.788736	39.765	36.2192	1	4
100.675	49.6367	10.8031	47.6292	17.8006	1	4
75.649	34.1448	7.43139	47.039	20.2778	1	4
72.1556	8.20908	1.78665	56.7099	67.1489	1	4
47.1862	5.11464	1.11317	43.6981	14.7616	1	4
54.4913	4.58768	0.998478	49.8835	53.1238	1	4
113.5	34.232	7.45036	48.6304	36.8739	1	4
87.811	22.4501	4.88611	38.0297	64.1312	1	4
101.478	14.898	3.24245	34.9279	47.1241	1	4
105.251	41.9927	9.13942	45.2865	27.5232	1	4
86.3876	28.642	6.23373	45.9071	37.844	1	4
85.2443	24.525	5.33771	44.0774	38.426	1	4
67.2044	8.00659	1.74258	46.8857	33.9524	1	4
105.073	61.7669	13.4431	55.461	24.4847	1	4
56.0043	4.80636	1.04607	38.5491	11.8025	1	4
63.2322	4.37238	0.95162	39.6004	52.4306	1	4
45.9513	4.15415	0.904122	44.4387	17.8492	1	4
84.8514	4.34009	0.944591	49.1622	45.717	1	4
66.6048	6.33333	1.37841	45.2571	22.1653	1	4
69.8487	43.6337	9.49657	46.0948	23.6049	1	4
92.3505	7.75265	1.68731	45.8862	24.841	1	4
98.5192	37.3566	8.13042	51.0192	39.7044	1	4
93.6324	11.6724	2.54041	48.1905	73.1261	1	4
77.3967	22.9707	4.99943	42.3016	70.5514	1	4
63.0474	3.22444	0.701777	37.6733	25.8601	1	4
97.0777	41.6345	9.06145	46.9391	25.9137	1	4
165.851	82.8272	18.0268	61.6654	21.9214	1	4
108.692	56.4475	12.2854	42.6187	37.4216	1	4
61.5	4.98529	1.08502	40.6225	61.1707	1	4
14.4702	2.32583	0.5062	41.2649	10.2226	0	4
13.3506	2.57955	0.56142	39.7013	7.51085	0	4
11.4709	2.18762	0.47612	38.8743	14.7616	0	4
16.3803	3.0841	0.671232	58.7952	9.9997	0	4
14.6065	2.97685	0.647891	51.8488	21.8051	0	4
15.8024	3.17657	0.691359	46.6591	7.9082	0	4
11.3701	1.95697	0.425921	40.8967	17.6702	0	4
15.1432	3.65768	0.796068	52.5539	9.8071	0	4
12.3948	2.37589	0.517095	43.3783	35.3763	0	4
14.9169	2.78947	0.60711	49.5983	29.8601	0	4
17.871	3.09039	0.672603	48.4962	31.9763	0	4
17.5154	3.4209	0.744534	64.2716	47.1241	0	4
12.8417	2.3	0.500579	38.3167	40.1632	0	4
18.6317	4.3874	0.954888	55.4332	21.9846	0	4
14.1682	2.88226	0.627305	41.1239	47.7455	0	4
15.9901	2.97313	0.64708	47.198	40.678	0	4
14.5345	3.19828	0.696083	43.4138	51.5467	0	4
17.5	3.75147	0.816482	59.2088	43.4096	0	4
14.9959	3.39381	0.73864	51.2701	45.9503	0	4
15.546	3.4862	0.758747	65.9831	39.3828	0	4
13.8161	2.97157	0.646742	48.5652	49.3949	0	4
14.3682	3.2007	0.69661	41.8709	53.6834	0	4
13.4841	2.99437	0.651704	38.9437	63.1348	0	4
14.905	3.64253	0.792773	62.3032	39.1355	0	4
14.5632	3.22253	0.701361	54.75	62.6929	0	4
15.7728	3.21346	0.699387	43.932	55.4492	0	4
17.4479	4.30729	0.937452	59.7188	40.875	0	4
18.1969	4.13438	0.899818	52.1125	9.58052	0	4
15.8115	3.74945	0.816041	57.8315	51.1991	0	4
16.5933	3.59664	0.782784	55.6235	72.1738	0	4
12.0281	3.13391	0.682074	38.8639	71.1015	0	4
20.7223	5.19669	1.13102	55.3702	19.4485	0	4
15.0688	3.55505	0.773731	51.8463	60.2194	0	4
13.6058	3.05076	0.663977	41.3384	69.0133	0	4
14.8922	3.18922	0.694113	44.3221	3.8766	0	4
18.0821	3.77378	0.821336	61.928	48.4139	0	4
13.1598	3.3516	0.729452	47.4292	75.948	0	4
15.4632	3.95588	0.860971	45.4743	72.8346	0	4
16.1245	3.62075	0.788032	61.6302	60.1377	0	4
15.4482	3.65179	0.794786	42.0357	76.4524	0	4
18.7805	3.70397	0.806143	67.296	72.5603	0	4
12.8878	3.35314	0.729787	51.6106	86.4115	0	4
14.9661	3.39821	0.739598	43.6946	81.9675	0	4
23.0864	4.8383	1.05302	78.9292	51.3355	0	4
16.0686	3.39787	0.739522	48.6418	86.9982	0	4
16.0402	3.95372	0.860501	43.8068	83.7919	0	4
17.4408	4.10128	0.892616	52.6362	64.6939	0	4
17.0502	3.87671	0.84374	54.0068	26.8858	0	4
13.5839	3.17805	0.691682	41.8406	94.1892	0	4
13.7331	3.49719	0.76114	42.986	92.565	0	4
19.034	4.24349	0.923566	68.4655	83.7533	0	4
15.8864	4.18486	0.910805	49.3853	49.6447	0	4
14.491	4.25549	0.926178	41.8663	89.484	0	4
16.0578	4.38435	0.954225	45.7007	92.4563	0	4
16.3903	4.24194	0.923228	59.3274	64.6894	0	4
18.022	4.35683	0.948234	71.5088	58.1489	0	4
17.4045	3.42556	0.745549	46.0633	15.4167	0	4
18.9219	4.74777	1.03332	56.1406	33.5637	0	4
13.4926	3.71078	0.807627	41.7157	103.016	0	4
16.0643	3.38728	0.737217	43.4398	98.1399	0	4
14.6773	3.52463	0.767112	49.6429	105.932	0	4
16.2854	3.7963	0.826238	48.2582	102.854	0	4
15.6965	4.14202	0.901483	47.286	97.1526	0	4
16.4214	3.52868	0.767993	92.2045	90.0326	0	4
14.9942	4.45665	0.969959	54.7803	98.1652	0	4
13.1418	3.60345	0.784266	47.3966	103.669	0	4
17.5413	4.02306	0.875591	54.0837	53.6748	0	4
39.5552	4.28595	0.932808	102.833	70.6758	0	4
17.5375	4.41897	0.961759	53.5909	46.544	0	4
15.0195	4.35505	0.947846	40.8274	115.145	0	4
19.5661	4.5422	0.988578	52.7834	106.427	0	4
16.4585	4.96047	1.07961	59.1087	61.7425	0	4
19.3594	4.7218	1.02767	61.5925	55.3741	0	4
16.7396	3.8099	0.829198	56.4922	24.7243	0	4
23.3047	4.51904	0.983538	56.6841	45.0086	0	4
15.3322	4.15724	0.904796	39.6254	110.022	0	4
14.3254	4.18935	0.911783	49.1272	105.139	0	4
13.5932	3.49869	0.761465	43.5459	113.917	0	4
19.2039	4.15067	0.903365	53.915	102.478	0	4
18.471	3.92664	0.854606	80.0618	59.6116	0	4
15.2	4.30196	0.936292	44.7627	95.4777	0	4
18.1338	4.4608	0.970863	73.4379	79.8718	0	4
15.6203	4.51055	0.98169	49.3165	106.316	0	4
21.6397	4.46168	0.971055	65.2712	58.8779	0	4
21.7327	4.65936	1.01408	58.8727	66.699	0	4
17.5276	4.08425	0.88891	53.8273	56.9457	0	4
16.3174	4.22614	0.919791	42.7531	112.363	0	4
20.9396	4.96469	1.08053	75.0444	91.7578	0	4
17.65	4.01901	0.874711	44.6214	130.759	0	4
18.0659	3.87681	0.843761	42.4466	34.8678	0	4
19.3805	4.31078	0.938212	82.4123	84.2109	0	4
17.0977	4.21069	0.916427	45.5328	33.744	0	4
19.6015	4.33579	0.943656	80.8229	72.8148	0	4
15.0577	4.03926	0.879117	57.649	41.0218	0	4
12.4172	3.77707	0.822053	36.0127	129.394	0	4
15.28	3.97273	0.864637	54.4218	127.325	0	4
16.06	4.51391	0.982421	43.5315	121.464	0	4
16.2898	4.24115	0.923057	49.6681	65.3508	0	4
16.7216	4.8441	1.05428	46.6281	105.219	0	4
13.7704	4.12346	0.897442	40.237	114.034	0	4
13.5471	4.09412	0.891057	38.9706	127.026	0	4
20.5286	4.71156	1.02544	56.1753	52.1986	0	4
16.1622	3.88031	0.844523	75.5	74.187	0	4
16.9048	4.23633	0.922008	55.4409	84.6934	0	4
17.7997	4.75131	1.03409	55.089	102.091	0	4
14.4771	4.27124	0.929606	42.1634	131.02	0	4
17.4477	4.05357	0.882232	48.9554	46.4794	0	4
13.2887	3.95612	0.861022	35.3441	138.62	0	4
15.6055	4.18166	0.91011	36.8131	123.981	0	4
14.9409	4.29759	0.935342	45.9497	97.7936	0	4
17.6108	4.5767	0.996088	48.5526	75.6376	0	4
15.9083	4.02183	0.875325	50.0699	71.6102	0	4
16.8237	4.30854	0.937724	49.2369	79.5629	0	4
14.2645	4.06549	0.884826	31.2645	134.695	0	4
17.7767	4.45661	0.969952	53.4552	83.593	0	4
16.4943	4.40943	0.959683	40.9226	118.236	0	4
13.4	4.16538	0.906567	45.45	140.928	0	4
16.6719	4.79241	1.04304	44.7321	113.221	0	4
15.4068	4.26136	0.927457	39.4932	108.166	0	4
17.8684	3.5443	0.771393	60.8456	61.4902	0	4
15.5379	3.56696	0.776325	50.192	57.2373	0	4
15.369	4.74524	1.03277	34.5827	149.675	0	4
21.3453	4.88568	1.06334	62.4007	92.3756	0	4
16.8523	4.43764	0.965823	35.5409	143.658	0	4
18.0452	4.11826	0.896311	50.2435	89.5621	0	4
16.7095	4.83451	1.0522	45.4771	137.547	0	4
15.8894	4.08936	0.890022	51.4298	86.5031	0	4
13.7368	4.60855	1.00302	35.1678	147.937	0	4
18.1078	4.57214	0.995095	50.7761	98.3958	0	4
18.2246	4.62411	1.00641	46.0437	125.874	0	4
18.5777	4.9395	1.07505	42.8019	120.748	0	4
20.0789	4.75874	1.03571	50.5869	112.808	0	4
15.1735	5.08673	1.10709	41.2959	151.487	0	4
18.83	4.65587	1.01332	48.6883	95.615	0	4
18.035	4.68389	1.01942	51.3678	98.3799	0	4
19.14	4.61684	1.00482	52.1514	106.769	0	4
17.4811	3.59967	0.783444	68.9292	66.0555	0	4
15.0678	4.0339	0.87795	59.5254	73.3203	0	4
17.5012	4.48694	0.976551	42.747	153.638	0	4
14.0197	4.6179	1.00506	32.5917	156.625	0	4
16.4607	3.90234	0.849317	50.4501	79.2112	0	4
13.193	4.31329	0.938758	30.4272	161.493	0	4
14.0856	4.61027	1.00339	37.4696	147.749	0	4
17.9613	4.53866	0.987808	61.5851	89.3741	0	4
15.7873	4.50476	0.980431	45.7714	134.817	0	4
17.459	4.84139	1.05369	36.8655	165.419	0	4
16.0315	5	1.08822	38.6126	133.436	0	4
18.6716	4.78071	1.04049	42.5029	126.008	0	4
16.1131	4.11861	0.896388	42.3978	120.274	0	4
12.7606	4.03939	0.879146	27.6576	164.9	0	4
14.9865	4.53499	0.987009	47.9255	107.039	0	4
14.2296	4.63424	1.00861	31.0467	171.852	0	4
18.3399	5.45953	1.18823	46.473	150.919	0	4
21.9482	4.27262	0.929907	66.4263	75.4195	0	4
19.3414	4.54428	0.989032	49.657	111.528	0	4
17.6088	4.07513	0.886924	59.1606	102.389	0	4
14.4658	5.13242	1.11704	41.4041	144.343	0	4
15.2945	4.14887	0.902972	38.8964	133.094	0	4
14.4144	3.91441	0.851945	48.4369	120.597	0	4
14.1986	4.28469	0.932533	40.8158	130.17	0	4
17.5884	4.54137	0.988399	37.7616	126.66	0	4
15.9583	5.10436	1.11093	33.3359	172.961	0	4
13.3188	4.46789	0.972406	30.0367	162.463	0	4
18.7106	4.14613	0.902377	49.6375	93.1606	0	4
16.3403	4.32118	0.940475	38.2674	139.191	0	4
20.7939	4.96044	1.07961	53.4414	120.958	0	4
19.2155	4.4515	0.968839	49.9416	112.1	0	4
15.8184	4.66344	1.01497	48.2494	118.348	0	4
16.0243	4.1779	0.909292	38.2865	130.497	0	4
15.0824	4.63564	1.00891	32.234	175.925	0	4
17.0359	3.9779	0.865763	49.4834	97.1627	0	4
14.8214	4.87075	1.06008	34.8929	162.385	0	4
17.5018	4.95863	1.07921	31.2842	183.067	0	4
14.8308	4.68718	1.02013	35.4598	157.2	0	4
15.3142	4.34699	0.946094	40.1557	141.713	0	4
18.8643	4.82194	1.04946	40.3965	127.638	0	4
20.0936	3.93719	0.856903	62.0911	97.5397	0	4
14.1491	4.17604	0.908886	42.022	153.246	0	4
16.8786	4.32817	0.941995	46.1266	109.814	0	4
16.4117	4.41165	0.960165	43.2194	115.964	0	4
19.4122	4.79462	1.04352	53.2535	107.563	0	4
13.3394	4.47292	0.973501	27.9567	190.244	0	4
12.8071	3.88103	0.844679	27.2765	187.037	0	4
16.2568	4.17808	0.909331	34.1789	166.721	0	4
17.7922	4.84854	1.05525	44.1573	128.338	0	4
16.6369	5.02548	1.09376	43.0032	135.391	0	4
16.7492	4.03188	0.877511	34.9065	145.993	0	4
16.5625	4.44853	0.968192	41.682	137.592	0	4
16.8951	4.45824	0.970306	44.8865	133.504	0	4
17.8406	4.75362	1.03459	35.8076	152.716	0	4
11.7468	3.84416	0.836654	23.8831	199.56	0	4
13.3059	4.35529	0.9479	27.56	196.971	0	4
20.3823	4.45221	0.968993	47.2097	122.004	0	4
16.2267	4.63728	1.00927	39.8766	145.973	0	4
19.9811	5.38316	1.17161	40.3438	148.482	0	4
15.495	4.26799	0.928899	28.9529	192.917	0	4
19.3754	5.50673	1.1985	41.064	140.036	0	4
15.5511	4.1436	0.901825	34.6779	184.826	0	4
13.359	3.80639	0.828435	36.5263	202.467	0	4
17.6051	4.72134	1.02757	33.9873	164.189	0	4
16.9542	4.87679	1.0614	46.7163	136.809	0	4
17.4564	5.34112	1.16246	44.0389	148.117	0	4
17.7862	3.77445	0.821482	52.4524	117.12	0	4
15.8864	4.05495	0.882531	43.2308	169.539	0	4
18.7623	5.58984	1.21659	36.4374	156.563	0	4
12.8017	3.9023	0.849309	26.6322	197.179	0	4
22.6547	5.75513	1.25256	43.5095	149.747	0	4
10.3595	3.30992	0.720381	21.5785	224.463	0	4
12.7157	1.9802	0.430977	36.8755	1.98252	0	4
14.7798	2.26166	0.492234	48.0725	11.6298	0	4
13.3706	1.99887	0.43504	38.4531	4.86806	0	4
15.0669	2.71124	0.590082	41.3727	15.6732	0	4
13.2372	2.36828	0.515439	34.7048	5.27822	0	4
9.93854	1.66611	0.362618	46.7425	13.7521	0	4
15.5792	3.14454	0.684387	41.94	2.06814	0	4
16.3383	3.33457	0.725746	45	25.3887	0	4
14.0188	2.27708	0.495592	37.7385	21.5035	0	4
17.5628	3.08219	0.670818	47.9509	15.484	0	4
14.2141	2.74949	0.598409	39.5313	27.0487	0	4
17.3241	2.95216	0.642517	45.5262	17.6342	0	4
15.842	2.82744	0.615374	35.5613	34.7166	0	4
18.1571	2.91364	0.634134	49.0382	11.709	0	4
13.5951	2.13957	0.465663	49.5782	23.6049	0	4
16.124	2.85569	0.621522	46.2642	30.1816	0	4
14.6433	2.21338	0.481726	45.3949	27.5484	0	4
15.3265	3.11352	0.677636	42.1148	38.4741	0	4
17.3969	3.51473	0.764957	60.2114	27.4222	0	4
14.977	2.94018	0.639911	37.3252	46.2112	0	4
21.4583	3.94757	0.859162	55.833	30.0838	0	4
18.2934	3.57143	0.777297	51.4413	38.9445	0	4
14.7158	2.64534	0.575739	42.7581	48.2489	0	4
21.728	3.7101	0.807477	60.9739	25.0864	0	4
16.1664	3.46262	0.753616	40.5205	57.6889	0	4
15.3651	3.02385	0.658121	43.8587	62.4361	0	4
14.1599	2.90909	0.633144	36.3956	59.6329	0	4
19.0207	3.53025	0.768336	49.4793	22.2018	0	4
21.4566	4.38788	0.954992	56.3616	37.2529	0	4
18.9895	3.91449	0.851961	47.3979	49.7249	0	4
20.5077	4.02813	0.876695	53.5396	58.4928	0	4
20.4977	4.06422	0.88455	50.3188	72.7767	0	4
17.358	3.24606	0.706482	44.2792	5.628	0	4
15.3441	3.40124	0.740257	41.3081	1.52053	0	4
15.8934	3.23858	0.704854	49.4746	84.0178	0	4
21.4145	4.70944	1.02498	56.0162	16.1634	0	4
22.8405	4.15294	0.903859	54.9908	73.2382	0	4
24.9354	4.44737	0.967939	60.5287	82.393	0	4
23.0614	4.38289	0.953905	64.5385	47.2355	0	4
23.388	4.73703	1.03098	65.4564	76.3601	0	4
17.2199	4.05236	0.881967	42.5524	108.205	0	4
18.5266	4.05327	0.882167	50.9209	92.9401	0	4
19.5258	4.56443	0.993418	50.8763	82.365	0	4
14.9292	3.78761	0.824347	37.1711	114.768	0	4
18.475	4.38906	0.955249	59.1547	49.3141	0	4
16.4202	4.71779	1.02679	41.5644	110.898	0	4
16.5312	4.60349	1.00192	38.7756	120.081	0	4
17.7222	3.95791	0.861412	57.3047	54.8918	0	4
18.6187	4.30933	0.937896	48.0475	118.115	0	4
19.4361	4.21766	0.917945	55.2417	99.9958	0	4
19.0162	4.52291	0.984381	46.248	108.593	0	4
19.4644	4.3701	0.951123	55.6502	68.0688	0	4
17.354	4.19137	0.912222	39.7813	118.757	0	4
19.9008	4.68067	1.01872	52.7042	92.3211	0	4
19.5731	4.85612	1.0569	60.765	74.5027	0	4
22.3716	4.30622	0.937219	59.5343	62.0423	0	4
17.8647	4.30676	0.937337	52.4058	129.46	0	4
16.4249	3.98901	0.868181	39.6996	139.807	0	4
16.6323	4.32319	0.940912	35.2998	135.381	0	4
20.7097	4.63815	1.00946	48.1234	93.2084	0	4
19.5728	4.55617	0.99162	50.3689	121.226	0	4
20.1397	4.07997	0.887977	60.5362	79.7523	0	4
20.9187	4.01151	0.873078	54.5525	84.42	0	4
21.8529	4.66	1.01422	53.2153	69.9591	0	4
20.4927	4.82499	1.05013	41.9115	132.431	0	4
17.4811	4.55405	0.991159	56.0054	138.203	0	4
15.0677	4.69424	1.02167	30.4536	154.37	0	4
19.5488	4.04203	0.879719	50.8875	67.2831	0	4
19.027	4.83033	1.05129	42.491	122.778	0	4
20.565	4.29534	0.934852	48.9865	116.872	0	4
19.7624	4.80939	1.04673	48.3163	106.511	0	4
19.7582	4.81868	1.04875	56.5421	153.633	0	4
17.664	4.51212	0.982031	38.2682	157.364	0	4
18.4942	4.56226	0.992944	42.4442	113.132	0	4
15.8257	4.71582	1.02637	28.8204	167.57	0	4
19.3379	4.33621	0.943746	46.0448	109.561	0	4
16.2579	4.71053	1.02521	33.8368	155.362	0	4
22.6618	4.45343	0.969259	55.0392	79.7458	0	4
20.5228	4.16029	0.905459	55.4281	89.0183	0	4
17.2201	3.9979	0.870116	42.5241	95.6096	0	4
18.4618	4.82941	1.05109	35.1588	167.667	0	4
17.2139	4.58215	0.997274	31.6416	174.107	0	4
15.3113	4.51961	0.983662	26.4412	178.213	0	4
18.4797	5.12379	1.11516	39.2843	144.279	0	4
17.055	4.55861	0.99215	34.9942	156.239	0	4
14.9845	4.39752	0.957089	27.6335	173.284	0	4
20.4746	4.74153	1.03196	47.5064	130.486	0	4
18.9095	5.44239	1.1845	39.2058	171.884	0	4
17.2	4.59474	1.00001	33.0026	180.202	0	4
17.1164	4.12069	0.89684	36.0647	140.919	0	4
21.1285	4.70913	1.02491	47.2198	136.248	0	4
17.5339	4.62749	1.00714	40.3227	136.117	0	4
17.9917	4.57931	0.996655	36.5766	175.382	0	4
16.3533	4.49251	0.977763	30.3812	163.659	0	4
20.4603	5.06776	1.10296	38.8294	141.21	0	4
17.8007	4.47176	0.973248	36.5764	144.893	0	4
16.3843	4.0131	0.873424	33.4672	160.695	0	4
15.0651	4.54427	0.989029	27.862	191.369	0	4
21.7176	4.99059	1.08617	51.1129	119.059	0	4
19.9306	5.05093	1.0993	42.6574	131.582	0	4
15.2111	4.92963	1.0729	25.2185	202.019	0	4
15.0962	5.56152	1.21043	24.8859	187.155	0	4
21.2995	5.04011	1.09694	43.5775	132.829	0	4
14.8208	4.47977	0.974991	20.7312	211.722	0	4
17.8348	4.22792	0.920178	34.9202	173.542	0	4
15.4214	5.06606	1.10259	30.8428	183.408	0	4
13.3872	4.0188	0.874664	18.8496	214.053	0	4
15.3845	4.18953	0.911823	24.8953	212.239	0	4
17.2238	4.86667	1.0592	28.5595	180.338	0	4
20.1689	5.70667	1.24202	32.8844	177.555	0	4
14.7364	4.12971	0.898802	22.3138	221.272	0	4
14.1737	1.99692	0.434615	34.9856	8.5068	0	4
14.5128	2.3141	0.503649	40.8397	11.6843	0	4
17.4878	2.98584	0.649848	44.5199	20.1319	0	4
17.7188	2.87873	0.626537	41.1652	24.9037	0	4
17.8724	3.28584	0.71514	42.4205	37.6603	0	4
19.3263	3.80689	0.828543	51.1692	16.7948	0	4
14.0899	1.91923	0.417706	43.322	35.2962	0	4
12.4544	2.10877	0.45896	32.9632	40.4085	0	4
18.3873	3.27771	0.713371	53.201	12.9468	0	4
17.264	2.7675	0.602328	43.9114	40.8113	0	4
22.0691	3.7014	0.805585	64.7435	37.8196	0	4
20.351	3.76783	0.820043	55.2182	36.7971	0	4
16.3103	2.7694	0.60274	47.597	61.2699	0	4
18.0359	3.40637	0.741374	50.8964	47.4065	0	4
17.405	3.54977	0.772584	42.7964	63.3478	0	4
16.9599	3.43472	0.747543	37.27	75.5382	0	4
17.7322	3.17279	0.690535	39.7559	78.1512	0	4
20.8907	4.32802	0.941963	58.0979	53.4752	0	4
21.4638	3.75362	0.81695	51.7246	61.9005	0	4
18.1589	4.09884	0.892084	42.1337	78.5525	0	4
16.7435	3.50145	0.762066	41.3696	90.5479	0	4
16.2432	3.20061	0.69659	43.0061	96.8194	0	4
20.5606	4.39962	0.957547	56.6856	86.3125	0	4
21.7554	4.26789	0.928876	50.8386	63.7869	0	4
23.7378	4.67442	1.01736	61.7357	56.241	0	4
19.5506	4.09791	0.891883	53.5795	95.0329	0	4
18.9608	4.4917	0.977589	42.4781	97.4953	0	4
21.7972	4.22877	0.920363	56.9307	85.6004	0	4
23.406	4.4249	0.963049	60.4438	59.3784	0	4
20.4339	4.2526	0.925549	50.9629	50.4668	0	4
16.1392	3.6108	0.785865	39.2784	113.304	0	4
22.6233	4.45991	0.970669	59.475	82.2912	0	4
17.3955	3.9574	0.861302	36.8012	126.58	0	4
23.522	4.53626	0.987286	55.1502	86.7133	0	4
21.4177	3.88441	0.845414	52.1581	44.149	0	4
19.539	4.58559	0.998021	46.1802	80.2839	0	4
24.0486	4.71094	1.0253	59.6529	70.4227	0	4
20.0866	4.78209	1.04079	41.8836	134.345	0	4
18.8753	4.59221	0.999463	56.7896	87.5287	0	4
22.7743	4.69665	1.02219	55.5044	85.2668	0	4
18.3653	4.58873	0.998705	35.7349	114.487	0	4
21.0873	4.52958	0.985831	50.569	105.683	0	4
19.2063	4.47741	0.974477	48.375	80.0214	0	4
20.7196	4.42254	0.962534	47.4814	89.1734	0	4
20.5814	4.49471	0.978244	38.2558	132.644	0	4
19.7139	5.67192	1.23445	36.8058	140.186	0	4
16.9802	4.31023	0.938092	28.3366	162.308	0	4
20.3394	4.14507	0.902146	47.5662	99.824	0	4
20.0604	5.17647	1.12662	39.3978	143.537	0	4
20.0237	4.48665	0.976488	41.6276	131.281	0	4
18.3727	4.57273	0.995223	33.9432	159.138	0	4
17.5315	4.36593	0.950215	34.8565	134.724	0	4
21.4023	4.9702	1.08173	45.8725	121.549	0	4
20.7082	5.08511	1.10674	49.6353	124.112	0	4
19.9185	4.89207	1.06473	38.2797	138.635	0	4
14.8064	4.13873	0.900766	24.3699	175.868	0	4
16.2995	4.78218	1.04081	22.3391	199.316	0	4
22.6807	5.57117	1.21253	41.3832	145.671	0	4
14.9914	1.82759	0.397762	40.931	13.689	0	4
14.346	1.97492	0.429829	41.7773	16.9387	0	4
18.7698	2.99319	0.651447	46.9939	18.7278	0	4
16.0822	2.82591	0.615039	41.085	20.0917	0	4
14.9634	2.18538	0.475633	54.1201	32.0106	0	4
19.5388	3.4254	0.745515	49.9963	27.7241	0	4
21.1206	3.44488	0.749754	52.5888	22.6885	0	4
22.4894	3.79056	0.824989	52.9362	7.35532	0	4
17.1523	3.47312	0.7559	44.1416	71.9042	0	4
14.2031	3.08623	0.671697	31.1655	70.3414	0	4
18.525	3.93135	0.855632	49.9518	53.6004	0	4
17.1106	2.97912	0.648386	47.6639	68.0425	0	4
14.1318	2.72206	0.592438	42.7421	70.3414	0	4
16.2743	3.80597	0.828343	41.8545	82.6277	0	4
21.5937	4.05891	0.883394	73.7961	61.4611	0	4
22.1621	4.29684	0.935178	58.2526	45.8345	0	4
20.3479	3.79866	0.826752	46.3512	24.2141	0	4
17.9412	3.44831	0.750502	40.4385	108.975	0	4
18.1406	4.08507	0.889087	57.9271	94.9763	0	4
16.6936	4.44509	0.967443	39.6127	119.492	0	4
23.9899	4.11984	0.896655	59.5317	69.5639	0	4
19.9021	4.25276	0.925585	52.9779	112.515	0	4
21.2685	4.46884	0.972613	47.0119	49.4171	0	4
20.1288	4.74891	1.03357	45.845	110.749	0	4
22.0016	4.82496	1.05012	55.8055	105.196	0	4
21.7104	4.54098	0.988314	51.8871	101.174	0	4
21.3969	4.77264	1.03873	42.6146	136.951	0	4
20.4954	4.36239	0.949443	49.7339	97.7765	0	4
19.0937	4.59719	1.00055	38.7096	134.766	0	4
21.2481	4.75194	1.03423	40.5736	151.447	0	4
19.4265	3.63507	0.791148	56.564	82.2947	0	4
18.8741	4.5979	1.0007	46.8462	117.422	0	4
21.5381	4.21622	0.917631	43.3833	112.488	0	4
23.0707	4.65789	1.01376	47.4194	110.312	0	4
23.7867	4.74408	1.03252	45.981	104.64	0	4
19.2065	3.44684	0.750181	53.2173	95.3032	0	4
16.6673	3.76155	0.818676	27.3706	169.318	0	4
20.1242	5.14737	1.12029	35.6863	156.926	0	4
14.4315	3.35845	0.730943	25.0183	222.272	0	4
17.1029	2.25651	0.491113	37.6914	1.83096	0	4
17.4432	2.64448	0.575553	68.9042	23.5878	0	4
17.1203	2.70802	0.589382	46.3672	10.6491	0	4
13.6647	1.92824	0.419667	36.9565	26.5548	0	4
16.4633	3.22186	0.701216	43.3051	29.5644	0	4
15.2059	3.14861	0.685273	37.8437	54.2223	0	4
16.7413	2.76443	0.60166	49.3834	46.8411	0	4
16.8019	3.26291	0.710149	38.4382	1.36	0	4
20.65	3.86585	0.841377	54.8744	13.6085	0	4
17.0853	2.93107	0.637928	45	81.8045	0	4
21.5317	3.60927	0.785533	56.2015	53.1097	0	4
24.8355	4.15935	0.905253	56.7875	32.4927	0	4
17.8744	3.53587	0.769559	44.7758	110.584	0	4
19.7617	3.78972	0.824806	50.1519	74.6097	0	4
21.3951	4.36393	0.94978	55.3656	59.9182	0	4
22.7184	4.44286	0.966957	53.9898	51.4379	0	4
20.82	4.17787	0.909286	42.9566	109.156	0	4
18.6218	3.99214	0.868863	42.7767	121.225	0	4
19.1253	3.95422	0.860608	51.012	71.6118	0	4
19.525	3.71	0.807456	47.6125	73.8747	0	4
21.1832	4.46121	0.970951	76.9397	95.0402	0	4
20.8733	4.44444	0.967303	49.7711	118.674	0	4
18.8478	4.4654	0.971863	41.3564	156.705	0	4
20.4042	4.1095	0.894405	48.5805	100.836	0	4
20.5111	5.54321	1.20644	36.8617	153.486	0	4
19.3059	4.86436	1.05869	31.9566	170.64	0	4
20.4086	4.60333	1.00188	40.0784	119.522	0	4
20.707	5.28025	1.14921	40.0701	136.131	0	4
17.5056	4.02709	0.876468	28.5011	172.162	0	4
16.3141	3.97746	0.865668	26.631	193.058	0	4
14.7825	1.80309	0.39243	36.3089	11.1373	0	4
17.3366	2.55633	0.556367	40.79	8.66833	0	4
13.5209	2.11071	0.459381	33.8584	34.635	0	4
16.9157	2.78656	0.606476	41.635	26.6591	0	4
14.6425	1.99157	0.433451	40.2479	48.9045	0	4
27.5476	3.21164	0.698991	56.2963	22.3729	0	4
22.3295	4.0459	0.880563	71.4951	70.6587	0	4
19.8635	3.91224	0.851473	48.454	49.458	0	4
19.1828	3.94265	0.858091	45.2885	93.4258	0	4
22.9078	4.57349	0.995388	70.0375	77.0908	0	4
16.7089	3.93036	0.855415	35	129.996	0	4
17.7778	4.10185	0.89274	48.7384	79.5898	0	4
21.8398	4.41019	0.959848	46.7112	119.933	0	4
21.033	3.84404	0.836628	51.255	79.0184	0	4
19.6814	4.25221	0.925465	56.8407	118.811	0	4
18.5217	5.11957	1.11424	30.962	153.909	0	4
18.8296	4.43454	0.965147	35.3871	157.926	0	4
18.8188	4.96542	1.08069	34.6515	173.036	0	4
16.1499	3.69767	0.804773	24.7933	202.709	0	4
21.7036	4.50281	0.980007	56.1839	142.979	0	4
14.6348	2.51404	0.547165	47.0618	14.6042	0	4
15.5	3.17268	0.690512	35.0129	30.9419	0	4
15.2247	2.77926	0.604886	39.9309	27.8073	0	4
16.898	3.17857	0.691794	52.898	14.9291	0	4
14.0559	1.76176	0.383436	39.5103	40.8708	0	4
16.8462	3.54562	0.771679	43.8104	29.0436	0	4
17.1254	4.97561	1.08291	49.1951	73.8301	0	4
28.6838	4.28458	0.932511	67.6047	68.8061	0	4
16.3177	4.52573	0.984993	36.5951	114.054	0	4
18.6824	4.02888	0.876857	40.1976	108.43	0	4
18.1903	4.19839	0.913751	43.7989	109.012	0	4
23.9909	4.51543	0.982752	68.5445	94.5402	0	4
19.4456	4.29118	0.933945	37.7956	149.669	0	4
20.9044	4.35373	0.947559	43.5373	118.555	0	4
19.4016	5.74093	1.24947	38.557	154.485	0	4
20.1082	4.57674	0.996095	42.7173	142.49	0	4
19.0885	3.68633	0.802304	42.4129	117.517	0	4
21.6023	4.29787	0.935402	48.689	117.349	0	4
18.3149	4.21662	0.917719	26.6146	175.394	0	4
15.8609	3.39645	0.739214	28.3195	145.666	0	4
20.2601	3.51613	0.765261	58.8931	100.09	0	4
19.7996	4.57341	0.995372	35.8571	158.628	0	4
19.4462	3.54103	0.77068	36.9026	125.854	0	4
14.6022	3.60652	0.784935	25.7043	218.986	0	4
24.2645	6.31818	1.37511	44.2252	160.486	0	4
17.3696	3.15182	0.685971	55.6733	23.0122	0	4
14.6934	2.90331	0.631887	38.605	21.0745	0	4
15.5652	3.08318	0.671032	40.4083	15.8493	0	4
19.8259	5.86032	1.27546	50.0992	37.074	0	4
16.1935	3.01935	0.657142	48.8806	20.292	0	4
11.3314	1.69591	0.369102	34.8265	39.7553	0	4
18.0801	3.58188	0.779572	39.7631	56.4041	0	4
12.8934	2.20063	0.478951	32.7053	52.4482	0	4
13.4746	2.8	0.609401	42.5313	51.8152	0	4
16.2323	3.66162	0.796926	38.5354	78.7135	0	4
19.7147	3.92331	0.853882	42.7086	58.9574	0	4
18.4264	3.50342	0.762496	48.7551	42.3747	0	4
17.4257	3.73092	0.81201	51.7149	92.1105	0	4
20.1182	4.00909	0.872551	45.7295	35.7889	0	4
18.3415	4.1777	0.909248	44.5436	98.2529	0	4
20.2045	3.33227	0.725245	54.4984	56.28	0	4
17.5243	3.79288	0.825494	40.6893	104.755	0	4
18.5894	3.75688	0.817659	43.445	40.5342	0	4
18.979	4.67192	1.01681	39.8451	123.682	0	4
18.1214	3.39506	0.738912	41.5103	82.4127	0	4
16.1136	3.32784	0.724281	38.3901	116.032	0	4
16.815	4.1025	0.892881	27.915	169.921	0	4
14.8323	5.26627	1.14617	26.5779	184.404	0	4
14.8806	3.56129	0.77509	22.9806	171.927	0	4
17.8942	3.96328	0.862581	36.8423	195.034	0	4
16.3366	3.61165	0.786051	32.3172	116.335	0	4
100.356	74.1789	11.6402	42.9563	5.05446	1	5
72.5198	41.7316	6.54854	58.9661	20.6478	1	5
50.7596	8.77738	1.37735	53.5021	93.0048	1	5
123.707	73.2133	11.4887	50.0326	15.1634	1	5
117.448	62.4871	9.8055	37.9968	11.2611	1	5
107.607	11.8716	1.86289	42.0933	28.0371	1	5
109.201	63.5956	9.97945	39.9077	12.6533	1	5
139.298	90.5614	14.2109	38.0156	1.98252	1	5
84.5274	16.2154	2.54453	48.0888	37.7538	1	5
98.7968	24.4723	3.8402	45.3536	43.18	1	5
74.9882	14.4213	2.26299	44.6437	63.7579	1	5
125.696	111.893	17.5583	53.6507	5.93784	1	5
119.421	81.2885	12.7558	41.5308	11.545	1	5
82.9538	24.7343	3.88132	45.1947	48.2477	1	5
60.9023	23.3579	3.66532	52.7627	52.7	1	5
100.508	31.5847	4.95628	43.6171	38.3537	1	5
83.5358	20.9248	3.28353	44.9057	42.1723	1	5
80.164	20.2633	3.17972	44.7621	71.0209	1	5
104.305	13.77	2.1608	52.0801	65.3977	1	5
106.279	14.6697	2.30197	69.6815	80.2465	1	5
86.4201	6.34573	0.995774	39.7259	133.322	1	5
117.71	84.4659	13.2544	36.0546	11.6298	1	5
122.309	99.8902	15.6748	42.8726	7.14809	1	5
56.7611	6.51478	1.0223	48.0296	30.8408	1	5
83.4913	36.5037	5.72818	47.2868	24.6236	1	5
124.299	69.3912	10.8889	37.789	18.7771	1	5
81.6706	47.8659	7.51113	41.4063	46.2325	1	5
91.0103	36.6342	5.74865	42.865	44.2993	1	5
77.3236	16.1209	2.52969	43.7836	64.6268	1	5
105.885	21.261	3.33628	44.4301	83.4359	1	5
76.4185	8.86581	1.39123	48.8754	83.6663	1	5
105.743	16.6098	2.60642	42.5754	65.0183	1	5
83.7576	8.68539	1.36291	42.2343	86.9822	1	5
66.0718	7.82184	1.22741	35.9885	167.418	1	5
81.4964	62.717	9.84158	39.3189	39.44	1	5
70.0756	5.88316	0.923188	39.5567	14.9019	1	5
80.8499	43.0066	6.74861	52.9713	52.06	1	5
58.8477	35.4112	5.55673	38.4645	55.3323	1	5
86.8375	29.3025	4.59816	45.098	68.1401	1	5
89.2474	27.4214	4.30297	39.0398	63.8657	1	5
79.3324	16.9838	2.6651	43.127	68.5764	1	5
59.6164	10.6	1.66336	42.0301	119.435	1	5
19.8268	4.98268	0.781885	50.9177	3.06	0	5
18.9909	4.6753	0.73365	46.4436	6.46	0	5
18.0609	4.27854	0.67139	48.9543	7.60263	0	5
18.9181	4.79766	0.75285	49.3127	11.56	0	5
22.0057	7.11905	1.11712	54.9456	11.9	0	5
20.5514	5.00935	0.786068	47.5654	14.2962	0	5
16.133	5.47894	0.859757	52.6408	15.98	0	5
19.3714	5.5395	0.86926	52.3966	16.4083	0	5
16.5609	5.27665	0.828014	37.0013	4.56158	0	5
18.9327	4.76205	0.747263	49.1974	13.0801	0	5
20.9241	5.01576	0.787075	53.0258	15.2697	0	5
19.7203	5.46406	0.857423	47.9562	19.04	0	5
28.0799	6.52145	1.02335	71.7012	22.1026	0	5
18.4079	4.52092	0.709424	58.8577	20.106	0	5
23.2617	6.66329	1.04561	63.7221	9.07233	0	5
17.1298	5.3204	0.83488	40.2159	19.956	0	5
20.8847	4.77423	0.749174	55.1067	23.4772	0	5
20.3973	5.35741	0.840687	49.5494	18.068	0	5
19.224	4.3808	0.687437	47.3456	26.86	0	5
24.4736	6.78899	1.06533	59.6445	27.5589	0	5
20.5774	6.81955	1.07013	55.0226	29.582	0	5
22.1953	5.10219	0.800637	51.2847	30.617	0	5
24.1971	5.14371	0.807152	49.266	5.93784	0	5
21.6408	5.90894	0.927233	54.3541	32.0485	0	5
29.7037	5.14352	0.807123	89.706	24.0849	0	5
18.0054	4.19821	0.658785	46.9357	2.15035	0	5
23.2109	6.82812	1.07147	57.6752	34.0068	0	5
22.0116	7.3396	1.15173	54.8338	33.3633	0	5
26.7176	6.36043	0.998081	63.6578	37.4	0	5
24.8854	5.83516	0.915656	64.259	27.3103	0	5
22.3975	4.77504	0.749301	55.4669	31.398	0	5
18.4749	7.1156	1.11658	44.2702	24.1974	0	5
30.1511	5.99411	0.940598	69.5132	37.7415	0	5
24.6196	4.79789	0.752886	65.317	40.46	0	5
18.6449	5.25845	0.825158	54.57	28.924	0	5
18.8085	5.05341	0.792982	51.9613	41.7923	0	5
21.6006	6.73227	1.05643	54.2923	42.2271	0	5
17.7837	9.20635	1.44466	54.7282	32.7108	0	5
22.3899	4.48951	0.704496	59.1678	40.8708	0	5
20.6841	7.41621	1.16375	51.1181	39.4766	0	5
26.9217	5.19968	0.815936	73.9736	44.4478	0	5
25.5974	6.07359	0.95307	54.3485	32.1565	0	5
20.4185	5.89538	0.925105	58.6934	49.0555	0	5
22.6536	5.9929	0.940407	54.8295	37.691	0	5
20.5277	4.69896	0.737363	44.7007	19.2453	0	5
21.5021	4.63107	0.726709	66.3259	47.6995	0	5
21.8628	6.18775	0.970984	54.518	51.3659	0	5
19.237	5.04688	0.791957	57.2318	52.4703	0	5
18.8955	7.00746	1.09961	57.4502	53.2238	0	5
24.9533	5.76268	0.904281	51.9452	40.1214	0	5
21.6186	5.43978	0.853612	47.6131	32.7002	0	5
17.783	5.32639	0.835819	43.0434	48.4902	0	5
23.6081	5.98535	0.939223	57.2564	54.7411	0	5
24.2591	6.97001	1.09374	59.1551	42.1888	0	5
22.2188	5.2168	0.818622	55.127	55.4492	0	5
24.1237	4.93816	0.774898	68.6124	11.3175	0	5
18.9513	5.74359	0.901286	53.1282	57.9688	0	5
23.5803	6.86957	1.07797	50.7637	43.6049	0	5
26.7991	6.10407	0.957853	61.8027	58.48	0	5
[truncated: 2,114 more rows]
