# Supplementary material for: The pattern of nodal morphogen signaling is shaped by co-receptor expression
Source: eLife. 2021 May 26;10:e54894. doi: 10.7554/eLife.54894 (PMC8266389; doi:10.7554/eLife.54894)
Supplement: Figure 2—source data 1. — The quantified fluorescence intensities are organized in this table. Each row corresponds to an individual nucleus. The following characteristics were quantified: average GFP pixel intensity (‘GFP’), average pixel intensity for α-pSmad2 staining (‘pSmad2Raw’), α-pSmad2 staining intensity normalized to background (‘pSmad2 Normalized’), average DAPI pixel intensity (‘DAPI’), distance from the embryonic margin in μm (‘marginDist’), GFP staining status (‘GFP_Flag’, 0 denotes a cell host nucleus, one denotes a sensor cell nucleus), and embryo replicate number (‘Embryo Number’). We note that normalized α-pSmad2 staining was used to generate the figure panel. [file elife-54894-fig2-data1.xlsx]

## Sheet: Sheet1
GFP	pSmad2Raw	pSmad2Normalized	DAPI	marginDist	GFP_Flag	EmbryoNumber
74.7054	17.2834	4.95348	38.0811	63.5945	1	1
72.4635	11.3691	3.25842	44.9957	76.5264	1	1
52.9353	29.2906	8.39479	43.0532	42.534	1	1
38.9569	7.62427	2.18514	33.5108	91.6425	1	1
49.5789	21.2173	6.08095	47.854	64.26	1	1
54.9856	15.9346	4.56691	39.5008	70.0648	1	1
41.5467	43.0315	12.333	38.9017	23.46	1	1
53.2272	12.2469	3.51	37.7852	80.6058	1	1
48.7471	29.6044	8.48472	36.0853	59.9182	1	1
18.5072	6.53025	1.87159	33.505	74.7397	1	1
28.9184	8.73899	2.50462	38.7684	71.6618	1	1
7.69569	5.02044	1.43887	40.76	168.3	0	1
7.91906	3.86511	1.10775	47.1007	110.5	0	1
6.94226	3.33564	0.956006	37.067	142.14	0	1
7.54839	5.94677	1.70436	48.2016	94.8899	0	1
8.98226	21.7579	6.23589	59.4461	58.6192	0	1
7.65421	4.19065	1.20105	44.9963	120.614	0	1
8.4803	36.546	10.4742	54.7842	28.1297	0	1
7.16795	3.6332	1.04129	31.6351	201.134	0	1
6.19598	2.37688	0.681223	79.0653	100.666	0	1
7.46364	5	1.43302	45.7045	134.649	0	1
6.09689	2.85121	0.817166	81.7509	112.093	0	1
9.63097	12.7842	3.66399	72.3954	73.0557	0	1
11.2723	8.82143	2.52825	53.6183	87.6462	0	1
7.45161	3.31183	0.94918	35.2957	158.71	0	1
5.97601	2.21033	0.633488	45.6328	129.637	0	1
10.2855	31.5077	9.03021	56.4074	47.7455	0	1
8.67905	5.44428	1.56035	47.841	110.968	0	1
7.92819	3.63643	1.04221	36.0476	146.728	0	1
9.93131	11.4676	3.28666	57.0515	83.7533	0	1
9.39583	3.89931	1.11755	41.7847	130.964	0	1
10.2138	72.843	20.877	54.775	14.5367	0	1
10.6791	11.9037	3.41164	65.0372	94.685	0	1
7.12389	4.85332	1.39098	28.1288	183.507	0	1
10.6166	33.5127	9.60485	52.6628	59.7472	0	1
8.2304	3.57559	1.02477	32.9475	156.622	0	1
8.85164	6.99615	2.00512	51.2524	105.42	0	1
7.10571	2.48238	0.711458	48.921	177.419	0	1
8.39317	4.74589	1.36019	41.598	131.02	0	1
9.98153	3.60714	1.03382	40.6872	157.861	0	1
9.15352	4.79859	1.37529	44.569	147.187	0	1
7.44397	4.49894	1.28941	36.6321	168.112	0	1
10.3243	7.2027	2.06432	48.7275	121.247	0	1
10.0756	9.64706	2.76488	61.0168	101.453	0	1
7.65969	2.52618	0.724011	54.267	146.728	0	1
6.3908	2.08046	0.596266	51.0613	207.149	0	1
9.37352	5.09102	1.4591	43.7837	128.616	0	1
13.2633	59.3857	17.0201	56.5196	31.8404	0	1
7.56787	27.8033	7.96852	57.7867	4.73565	0	1
9.75717	36.011	10.3209	51.4143	27.0337	0	1
9.02506	3.52381	1.00994	44.5213	134.764	0	1
8.5121	3.05959	0.876888	34.5829	185.475	0	1
8.08319	2.09558	0.600599	45.1593	113.575	0	1
9.42718	4.19695	1.20286	39.9168	157.763	0	1
8.85644	2.41337	0.691679	52.4975	145.613	0	1
7.86538	3.56469	1.02165	34.0017	191.275	0	1
8.97015	3.47927	0.99717	38.9934	143.913	0	1
7.63804	3.69939	1.06026	30.9468	204.999	0	1
9.58333	6.54688	1.87636	45.7222	87.9345	0	1
9.83988	5.28675	1.5152	43.7948	163.63	0	1
9.62729	3.54409	1.01575	44.2213	152.329	0	1
9.05603	4.45331	1.27633	36.0374	175.564	0	1
9.42741	25.2849	7.24674	76.3406	19.5256	0	1
10.1282	5.1542	1.47721	43.029	125.218	0	1
9.83001	4.87723	1.39783	47.1689	115.534	0	1
9.05014	3.69377	1.05865	38.5732	169.154	0	1
7.88945	3.24322	0.929516	36.0714	192.615	0	1
11.1677	6.28263	1.80062	58.5856	90.1	0	1
10.2901	4.49516	1.28833	44.0522	150.042	0	1
9.50912	4.10036	1.17518	46.0657	134.275	0	1
10.8319	72.217	20.6976	47.9617	10.54	0	1
8.63747	3.63747	1.04251	31.9206	200.116	0	1
11.1915	6.10704	1.7503	47.7352	104.076	0	1
8.67619	4.31746	1.2374	34.019	210.941	0	1
9.11986	3.11807	0.893648	34.2469	162.41	0	1
11.6736	27.2483	7.80944	65.8425	24.5954	0	1
8.17628	3.66227	1.04962	33.3245	184.724	0	1
9.54259	4.16404	1.19343	43.0852	135.631	0	1
7.09967	3.39321	0.972505	31.7076	203.243	0	1
9.80259	5.47411	1.5689	40.5599	154.767	0	1
11.4941	8.11111	2.32467	49.8322	80.557	0	1
10.5291	6.00612	1.72137	44.3884	108.695	0	1
9.67552	8.26755	2.36951	89.1803	39.7684	0	1
9.08436	4.93673	1.41488	42.8875	140.262	0	1
8.56281	3.29397	0.944062	38.4045	166.104	0	1
11.2387	7.00323	2.00715	48.0903	96.5947	0	1
8.45067	3.67733	1.05394	36.8587	202.441	0	1
7.1767	2.94757	0.844784	29.2796	192.995	0	1
9.48871	21.3519	6.11953	56.8433	54.3681	0	1
9.04756	4.07967	1.16925	39.9227	184.686	0	1
9.93056	12.6134	3.61505	55.2315	74.1699	0	1
9.87772	3.60598	1.03348	47.7826	115.912	0	1
8.49423	3.34926	0.959908	31.5189	207.006	0	1
8.98256	4.17636	1.19696	42.9516	174.803	0	1
10.7929	40.2702	11.5416	48.3787	43.3417	0	1
8.19598	3.87437	1.11041	37.6985	195.748	0	1
9.41551	4.28827	1.22903	49.4871	163.633	0	1
11.2058	23.3069	6.67982	57.648	55.4367	0	1
10.1342	9.57722	2.74486	47.8177	84.9898	0	1
8.14398	3.2356	0.927334	55.4319	116.566	0	1
9.0212	4.96231	1.42221	40.3239	133.644	0	1
8.63753	3.55784	1.01969	54.9717	106.187	0	1
8.93883	4.04267	1.15864	39.532	144.909	0	1
7.34375	3.58036	1.02614	30.3326	193.694	0	1
9.91667	4.03788	1.15727	43.0341	174.379	0	1
9.06649	7.09043	2.03214	42.3191	100.347	0	1
8.89841	3.65339	1.04707	36.4502	206.492	0	1
8.10526	3.95526	1.13359	41.3842	89.1734	0	1
9.78656	11.0802	3.17562	50.8656	77.0323	0	1
9.34813	5.68925	1.63056	43.4276	125.004	0	1
8.91214	3.52196	1.00941	35.2196	162.418	0	1
10.9913	47.3699	13.5764	49.341	26.52	0	1
10.3333	4.00877	1.14893	42.4715	213.118	0	1
9.41689	4.41417	1.26511	42.4278	139.4	0	1
8.91678	7.27046	2.08374	54.4036	98.6	0	1
9.19038	3.53307	1.01259	40.4168	182.775	0	1
10.6016	4.93387	1.41406	46.2694	174.06	0	1
8.85507	4.55797	1.30633	45.2923	132.223	0	1
8.19892	10.8626	3.11325	45.2749	75.48	0	1
8.85077	4.20923	1.20638	41.6277	121.615	0	1
9.26736	3.95486	1.13348	49.5046	154.815	0	1
8.63092	3.1197	0.894116	30.6584	192.596	0	1
9.13919	3.52015	1.00889	38.3956	146.351	0	1
8.26325	4.29068	1.22972	42.2815	178.188	0	1
7.8386	7.81404	2.23953	41.457	81.2088	0	1
8.95345	5.50901	1.5789	43.6081	125.46	0	1
9.10909	2.74141	0.785698	49.899	185.253	0	1
8.72297	4.71622	1.35168	44.603	156.43	0	1
9.28431	6.7451	1.93317	51.4534	105.766	0	1
8.46516	7.17702	2.05696	53.6177	91.5478	0	1
7.94118	2.96732	0.850443	30.5033	188.156	0	1
8.22951	3.60656	1.03365	41.7814	148.488	0	1
7.69164	4.99135	1.43054	45.5317	120.616	0	1
9.79966	4.41766	1.26611	45.6859	132.236	0	1
7.76235	2.17284	0.622743	47.2407	168.857	0	1
7.56981	2.30566	0.66081	57.7774	176.12	0	1
9.23204	7.72192	2.21313	47.4107	101.018	0	1
8.29268	3.22956	0.925601	45.3472	163.024	0	1
7.81955	3.90226	1.1184	53.0977	114.295	0	1
8.5952	3.7504	1.07488	34.8752	152.504	0	1
8.79859	8.31408	2.38284	46.1296	74.3987	0	1
10.2649	6.21603	1.78153	54.7772	116.012	0	1
7.60708	2.53628	0.726907	52.2142	178.369	0	1
8.24284	2.97667	0.853123	32.3584	198.598	0	1
10.2528	16.9362	4.85396	49.2203	50.4897	0	1
7.95242	3.62657	1.03939	36.5961	126.592	0	1
7.90368	8.0718	2.3134	48.9527	83.9256	0	1
9.08437	3.09926	0.888257	33.2961	189.553	0	1
8.09204	2.32338	0.665889	59.9179	166.57	0	1
7.32222	3.08034	0.882836	49.7316	119.452	0	1
9.58712	19.4217	5.56631	52.6223	47.5271	0	1
7.85344	3.48768	0.99958	51.6861	108.27	0	1
9.38655	12.9356	3.70738	49.8011	60.4263	0	1
8.16697	2.13824	0.612827	59.5673	170.841	0	1
8.12795	2.42236	0.694256	39.2236	191.082	0	1
7.28268	2.83824	0.813447	70.2843	87.6284	0	1
7.90123	5.5679	1.59578	58.4099	42.3624	0	1
7.07826	1.78043	0.510278	34.8543	179.113	0	1
8.80571	6.5	1.86292	53.0457	49.0284	0	1
8.14286	8.54082	2.44783	37.682	64.6188	0	1
7.54825	5.66082	1.62241	34.7237	75.8932	0	1
9.52299	4.18706	1.20003	40.9984	117.839	0	1
8.70987	20.5096	5.87811	46.3255	55.1566	0	1
7.73684	8.60441	2.46605	48.1426	80.5312	0	1
7.74613	3.89035	1.11499	38.441	128.736	0	1
7.39747	25.519	7.31382	42.0506	28.8179	0	1
8.38667	2.39	0.684982	34.2867	172.124	0	1
7.34615	2.11312	0.605628	31.6946	180.712	0	1
7.88021	6.83507	1.95895	46.1562	100.014	0	1
8.29068	17.3031	4.95913	46.5963	63.9751	0	1
7.26058	11.8439	3.3945	44.9378	74.5376	0	1
7.86336	3.71734	1.0654	33.1716	137.305	0	1
8.8664	9.6444	2.76412	46.4244	113.755	0	1
8.3898	28.1202	8.05934	39.6521	34.1577	0	1
7.47826	2.58261	0.740184	62.2739	121.857	0	1
8.87548	5.88889	1.68777	42.3755	132.426	0	1
8.04768	22.9656	6.582	50.1815	54.8792	0	1
8.05128	7.53718	2.16018	40.7436	102.137	0	1
7.20241	1.99518	0.571825	28.8337	186.81	0	1
7.61983	4.65621	1.33448	36.2311	137.115	0	1
7.29012	3.10063	0.888652	32.0598	156.09	0	1
6.968	31.0753	8.90629	33.38	20.4057	0	1
6.60634	2.18097	0.625073	51.9683	133.296	0	1
7.37475	3.77515	1.08197	31.925	190.755	0	1
8.05546	5.49567	1.57508	49.1005	81.7592	0	1
7.15924	4.00212	1.14702	37.2123	161.241	0	1
7.51635	3.06024	0.877075	32.1756	170.123	0	1
7.90841	7.90096	2.26444	51.1534	72.4	0	1
8.19134	5.80505	1.66375	49.5078	92.7029	0	1
7.9749	3.90154	1.1182	33.2066	179.47	0	1
9.09559	30.9559	8.87205	50.1853	40.6368	0	1
8.55844	5.11039	1.46465	46.4951	146.493	0	1
8.21488	4.01033	1.14937	34.657	169.98	0	1
9.22789	13.6717	3.91834	52.4918	62.889	0	1
9.12292	6.38333	1.82948	52.5375	120.794	0	1
8.35703	7.78998	2.23263	57.2019	75.7948	0	1
9.23918	29.5091	8.45741	42.3998	44.6126	0	1
8.87037	4.97531	1.42594	36.0988	189.741	0	1
7.58687	3.97674	1.13975	40.2367	137.113	0	1
10.4742	14.1669	4.06028	59.9572	70.8262	0	1
7.24954	4.07579	1.16813	34.8632	161.204	0	1
8.99251	5.04341	1.44546	46.8653	120.736	0	1
9.73778	45.2367	12.965	53.96	27.6134	0	1
8.72098	7.95112	2.27882	57.1202	78.3691	0	1
9.17729	20.7265	5.94029	51.6141	55.8108	0	1
9.14286	60.3856	17.3067	46.9733	5.27822	0	1
9.9284	11.2088	3.21249	58.611	69.926	0	1
9.77612	34.7396	9.95649	47.5489	29.5722	0	1
9.36132	8.28622	2.37486	45.984	76.1858	0	1
9.09653	3.60644	1.03362	41.7005	161.663	0	1
9.17312	21.9852	6.30102	47.8135	37.3226	0	1
9.63206	4.9308	1.41318	46.8725	110.161	0	1
8.77089	3.64151	1.04367	37.6792	185.75	0	1
8.32756	4.60852	1.32082	37.0546	156.858	0	1
6.06286	2.13714	0.612512	38.0314	196.517	0	1
8.75353	3.99615	1.14531	45.1977	107.083	0	1
8.43643	18.0167	5.16364	49.6157	45.006	0	1
9.32432	4.96757	1.42372	43.7423	182.866	0	1
8.69122	4.35893	1.24928	32.9639	195.989	0	1
8.47639	4.10139	1.17547	38.8458	161.451	0	1
8.3842	3.20704	0.919149	30.3757	182.859	0	1
8.5687	5.24174	1.5023	40.1965	99.5875	0	1
8.24095	3.62117	1.03784	34.883	175.384	0	1
7.55427	4.6825	1.34202	38.3412	90.1616	0	1
9.21118	3.56108	1.02062	38.1118	149.479	0	1
7.41623	4.21466	1.20793	37.7435	193.18	0	1
8.56844	4.83897	1.38686	38.1256	114.014	0	1
8.80815	2.91127	0.83438	32.8825	212.663	0	1
8.83065	20.8414	5.97321	50.4234	32.1781	0	1
8.33814	2.93269	0.840519	32.0609	170.945	0	1
9.07573	70.1452	20.1038	44.3963	8.16	0	1
8.92097	5.14894	1.4757	52.1702	121.753	0	1
7.45624	10.3652	2.97071	41.713	62.0898	0	1
9.22807	30.9406	8.86768	47.6221	23.4625	0	1
7.5202	4.1871	1.20004	40.0149	120.006	0	1
7.22816	2.75485	0.78955	49.7694	106.542	0	1
7.53956	3.55291	1.01827	28.9237	201	0	1
8.18835	3.96206	1.13554	38.6436	127.84	0	1
7.91211	2.82422	0.80943	31.6289	160.573	0	1
8.28843	3.74784	1.07414	34.1192	171.624	0	1
7.79242	3.0803	0.882825	28.6788	195.467	0	1
9.5	14.3064	4.10026	52.1128	54.06	0	1
7.64688	7.52522	2.15675	43.1499	75.48	0	1
7.38884	5.43215	1.55687	36.5496	100.093	0	1
7.24554	2.46139	0.705441	26.3822	194.177	0	1
7.5098	7.35472	2.10789	45.0267	86.4389	0	1
6.78486	2.90837	0.833547	44.1096	93.3967	0	1
8.29211	3.45789	0.991044	34.5763	188.281	0	1
7.53899	26.6606	7.641	37.9633	12.1499	0	1
8.5	4.04815	1.16021	38.6093	160.929	0	1
7.07191	2.65129	0.759868	59.6282	77.5207	0	1
8.07407	18.0154	5.16328	54.858	2.90496	0	1
7.83436	8.36503	2.39744	42.9586	64.908	0	1
9.32775	23.0239	6.59873	65.5024	5.80992	0	1
7.39524	2.68095	0.76837	30.65	156.194	0	1
7.68367	3.39286	0.972404	34.6582	134.348	0	1
10.7538	8.97442	2.5721	58.6471	143.537	0	1
8.42105	10.3672	2.97126	42.7343	51.7169	0	1
8.58101	23.102	6.62109	43.1173	18.7525	0	1
7.50457	8.266	2.36906	43.6362	76.922	0	1
8.32075	4.54245	1.30188	35.8113	146.137	0	1
7.14322	17.4786	5.00944	41.157	23.8776	0	1
6.8661	27.7161	7.94352	55.7449	3.46733	0	1
7.31098	2.62805	0.753207	30.5935	106.55	0	1
6.4177	25.4088	7.28226	33.1522	18.7093	0	1
7.13481	2.3159	0.663743	27.3883	175.73	0	1
7.46835	12.6095	3.61394	39.9416	42.0406	0	1
7.88527	13.5592	3.8861	39.779	63.9932	0	1
6.88259	20.1751	5.78225	35.4656	25.5815	0	1
6.98849	5.12664	1.46931	35.1447	106.992	0	1
7.6893	2.81276	0.806145	36.928	180.687	0	1
6.71589	2.19972	0.630446	27.5274	173.252	0	1
8.10886	13.9925	4.0103	44.4504	68.2452	0	1
6.84457	4.21848	1.20903	30.8123	127.577	0	1
7.50125	7.36842	2.11181	38.2423	113.932	0	1
7.06433	5.79532	1.66096	43.076	88.74	0	1
7.79582	9.82669	2.81636	55.7839	62.9	0	1
6.94704	21.0826	6.04233	48.2056	34.6817	0	1
7.08669	4.10256	1.17581	33.1136	153.83	0	1
7.86751	4.90207	1.40495	43.0138	109.373	0	1
7.09141	4.85675	1.39196	40.794	127.021	0	1
8.31055	16.1055	4.61589	46.2838	54.3883	0	1
7.18933	31.1721	8.93403	46.3821	24.2713	0	1
7.23917	3.55113	1.01776	32.3172	165.066	0	1
7.89189	4.15602	1.19113	38.7359	114.75	0	1
6.13703	2.90454	0.832451	42.9607	142.265	0	1
8.45309	31.742	9.09736	52.468	35.776	0	1
7.05979	3.65155	1.04654	43.4639	92.9046	0	1
8.75	5.49127	1.57381	42.6343	108.385	0	1
7.80715	3.6112	1.03498	30.5319	140.077	0	1
8.32168	4.15385	1.19051	40.5536	125.552	0	1
7.43646	5.35173	1.53382	27.8896	194.512	0	1
8.63151	49.7159	14.2487	51.5459	18.5604	0	1
9.36176	28.7333	8.23507	51.6275	31.3575	0	1
10.3407	12.2409	3.50829	55.9262	67.5779	0	1
7.91281	4.62087	1.32436	31.7886	173.375	0	1
8.30821	3.07087	0.88012	35.2812	141.304	0	1
9.16457	7.19386	2.06178	42.8591	93.8745	0	1
6.99085	3.9611	1.13526	26.0824	198.448	0	1
8.59235	17.1148	4.90515	43.0475	51.0283	0	1
8.20026	5.91964	1.69659	42.1684	94.6263	0	1
7.52803	3.14828	0.902308	28.1139	163.633	0	1
7.53744	2.84692	0.815937	28.1647	181.416	0	1
7.09877	8.87963	2.54493	45.6373	70.7404	0	1
7.40865	3.11779	0.893568	30.0601	178.023	0	1
7.76484	3.53995	1.01456	48.1461	122.332	0	1
7.789	3.82318	1.09574	32.4978	194.525	0	1
7.83696	4.125	1.18224	43.6522	98.1329	0	1
6.78005	2.70077	0.774049	26.0281	209.778	0	1
8.15471	3.94843	1.13163	32.7691	158.861	0	1
7.31153	2.75078	0.788382	50.9782	106.759	0	1
7.25036	7.7596	2.22393	38.7496	90.7902	0	1
8.91606	62.7352	17.9801	46.7641	2.04	0	1
7.37045	3.27045	0.937323	27.8136	210.778	0	1
7.65191	4.21527	1.20811	31.3985	149.822	0	1
7.07209	2.95749	0.847625	51.6932	99.62	0	1
7.53403	5.10995	1.46453	31.1309	186.605	0	1
8.04667	3.85111	1.10374	33.6756	143.955	0	1
7.84916	3.81378	1.09304	36.9683	175.146	0	1
7.2497	4.84653	1.38903	44.9574	108.911	0	1
7.65965	3.0183	0.865054	38.6514	160.526	0	1
7.746	3.57371	1.02424	34.476	132.316	0	1
8.15968	10.5968	3.03708	41.485	60.107	0	1
7.62195	2.39756	0.687149	45.6854	144.612	0	1
6.7561	2.36585	0.678061	45.2822	164.192	0	1
7.23169	2.79557	0.80122	27.4037	179.159	0	1
7.14032	2.53641	0.726944	25.7158	179.77	0	1
7.30331	12.747	3.65334	35.551	51.4154	0	1
6.47404	1.866	0.534801	23.9179	189.624	0	1
6.82861	3.81728	1.09404	33.5425	127.684	0	1
6.5255	30.8304	8.83608	37.0089	15.3754	0	1
6.50959	3.87808	1.11147	29.8918	158.1	0	1
7.19928	5.33493	1.52901	42.4466	98.6844	0	1
7.13802	4.33288	1.24182	28.7429	194.556	0	1
6.18511	2.36832	0.678768	45.3435	125.993	0	1
8.66035	10.0806	2.88912	43.9763	53.664	0	1
6.97054	5.04092	1.44474	38.2717	82.8994	0	1
8.28037	10.2856	2.94788	49.6189	62.4796	0	1
7.5779	4.61898	1.32381	36.5326	147.679	0	1
8.43963	5.8727	1.68314	40.3832	118.905	0	1
8.63701	14.6928	4.21099	47.9027	65.2809	0	1
8.43051	4.50604	1.29145	37.861	146.975	0	1
6.75128	2.29719	0.658383	45.3622	188.393	0	1
6.16038	2.17453	0.623227	32.684	205.271	0	1
8.29448	13.2102	3.78608	46.5557	58.5363	0	1
8.29692	4.65406	1.33387	40.2255	103.069	0	1
7.32941	3.75882	1.07729	33.3176	145.915	0	1
7.19478	4.58261	1.31339	28.0835	207.991	0	1
8.28171	10.1866	2.91951	41.9402	56.4328	0	1
7.67608	4.50403	1.29087	30.3441	185.979	0	1
8.06161	78.7536	22.571	45.4312	3.8766	0	1
7.06581	4.03839	1.15742	27.4461	200.022	0	1
6.75476	2.41015	0.690756	27.8372	208.13	0	1
6.99834	2.85406	0.817984	67.5655	105.642	0	1
7.71518	3.83689	1.09966	29.9159	190.053	0	1
7.76995	5.82003	1.66804	43.4069	90.6245	0	1
6.06183	2.23387	0.640235	25.8145	213.234	0	1
7.13251	9.57971	2.74558	37.0248	79.0915	0	1
6.35435	16.5526	4.74401	34.1652	46.9508	0	1
7	4.8568	1.39197	36.8568	106.935	0	1
6.4194	2.24627	0.643788	48.2343	166.449	0	1
7.17379	4.0812	1.16968	32.3846	149.841	0	1
6.64434	2.75058	0.788324	26.9584	191.472	0	1
7.34545	3.70364	1.06147	31.4491	169.737	0	1
7.16244	3.6106	1.03481	29.3502	192.966	0	1
7.53984	4.03187	1.15555	31.6375	177.402	0	1
7.30282	4.05634	1.16256	33.3549	123.08	0	1
6.22748	6.84873	1.96287	33.5115	76.84	0	1
7.06667	2.38333	0.683071	42.9833	151.722	0	1
7.09368	2.99766	0.859138	33.726	141.468	0	1
7.32862	4.86396	1.39403	37.6873	117.91	0	1
6.60437	5.42197	1.55395	40.1824	106.091	0	1
7.09381	3.5087	1.00561	37.0638	118.055	0	1
6.76344	4.11398	1.17908	33.4559	93.2177	0	1
6.76786	3.88474	1.11338	34.2679	136.773	0	1
7.44079	19.023	5.45206	37.7445	19.0218	0	1
6.46986	3.58733	1.02814	32.7883	106.442	0	1
7.30878	9.2931	2.66343	40.0392	62.1466	0	1
6.66839	3.69775	1.05979	29.7634	118.93	0	1
7.07113	11.8536	3.39728	33.7701	35.3747	0	1
7.44245	54.7899	15.7029	36.9652	2.28079	0	1
6.7903	3.07561	0.881479	29.7546	159.487	0	1
6.72143	31.7048	9.08669	35.1833	36.7735	0	1
6.76346	29.8904	8.56668	34.0308	3.66191	0	1
6.27996	2.647	0.75864	26.3708	163.745	0	1
7.1638	22.1876	6.35903	37.0515	32.7478	0	1
6.54584	7.68265	2.20187	31.0522	86.2884	0	1
7.1409	6.25686	1.79324	42.106	83.64	0	1
7.54772	16.0412	4.59746	45.4653	50.6885	0	1
7.92979	34.0904	9.77042	40.7681	25.1002	0	1
8.30877	49.0468	14.057	47.0608	14.0433	0	1
7.775	10.1217	2.90092	44.2011	77.2721	0	1
7.32085	13.6352	3.90789	40.1287	45.0099	0	1
7.59751	5.6556	1.62091	41.1134	104.052	0	1
7.17582	4.82555	1.38302	33.5	153.086	0	1
7.5958	10.1732	2.91568	44.0538	66.3488	0	1
7.88391	6.31264	1.80922	43.5805	90.9428	0	1
7.87975	6.53639	1.87335	40.5934	121.239	0	1
7.45263	5.67519	1.62653	36.3023	138.51	0	1
6.03655	2.45431	0.703413	41.6423	182.092	0	1
8.44926	27.0217	7.7445	49.3261	35.8857	0	1
7.66136	6.3097	1.80838	33.5962	175.292	0	1
6.74834	6.61369	1.8955	36.7859	90.2173	0	1
9.06818	83.5806	23.9545	47.6963	9.23649	0	1
7.99211	43.3402	12.4215	44.1351	17.5026	0	1
6.81723	4.5718	1.31029	57.017	71.0673	0	1
7.52	3.98308	1.14156	30.3954	164.807	0	1
7.73547	54.7415	15.6891	40.2996	7.82	0	1
7.7971	4.13941	1.18637	32.4886	164.048	0	1
5.97277	2.28218	0.65408	27.5124	201.028	0	1
7.3175	4.47761	1.2833	34.5875	121.159	0	1
6.03913	2.57826	0.738938	32.9717	135.247	0	1
6.60091	4.08844	1.17176	28.3719	176.755	0	1
6.68552	2.54908	0.730576	39.1314	131.973	0	1
6.27881	3.98862	1.14315	31.8706	107.1	0	1
6.50171	2.43664	0.69835	41.661	139.479	0	1
8.36498	19.0844	5.46965	43.7342	57.5916	0	1
6.69761	10.0836	2.88998	36.561	67.7701	0	1
6.15207	2.50461	0.717829	27.9954	113.121	0	1
6.47349	3.72212	1.06677	31.3181	134.235	0	1
6.36752	3.69231	1.05823	31.5157	103.217	0	1
7.18485	33.473	9.59347	36.38	5.93784	0	1
6.34143	9.63429	2.76122	57.8929	17.9557	0	1
5.11485	12.2455	3.50961	28.6891	30.323	0	1
7.01952	9.83333	2.81826	36.5751	66.4219	0	1
5.98435	2.98707	0.856105	24.8218	175.28	0	1
6.73286	16.279	4.6656	35.7234	61.937	0	1
5.2244	1.38569	0.397144	35.0421	185.75	0	1
6.13058	3.45189	0.989323	27.445	149.681	0	1
5.70032	2.22917	0.638886	25.3029	169.77	0	1
6.15491	4.38726	1.2574	26.2461	147.648	0	1
6.67148	20.1264	5.76828	59.1318	7.26837	0	1
7.54932	30.0055	8.59967	45.526	29.4075	0	1
5.75225	2.45045	0.702307	32.705	192.219	0	1
7.72766	4.84113	1.38748	37.6567	114.56	0	1
6.86808	16.1567	4.63055	41.0931	48.7103	0	1
8.29762	35.8452	10.2734	49.2024	25.4365	0	1
7.81073	7.40379	2.12195	40.6025	72.6121	0	1
8.45243	34.3117	9.83383	42.6262	24.8758	0	1
5.63565	1.8265	0.52348	42.6356	173.1	0	1
6.65511	3.40555	0.97604	23.8614	203.694	0	1
7.55806	14.8483	4.25558	39.5273	43.9443	0	1
6.07901	2.66366	0.763413	33.4221	129.819	0	1
6.90399	4.45109	1.2757	28.7609	181.61	0	1
5.76109	15.4175	4.41871	35.7509	53.7469	0	1
5.96739	2.59317	0.74321	31.8789	203.821	0	1
5.74442	2.39454	0.686283	30.1108	172.405	0	1
6.53934	4.50787	1.29197	24.8069	200.115	0	1
6.04485	2.18997	0.627653	35.1662	139.851	0	1
7.35036	2.20438	0.631782	41.1241	83.9862	0	1
6.03947	2.23872	0.641625	39.8609	144.174	0	1
7.19694	4.20569	1.20536	46.779	75.5114	0	1
6.17778	2.25833	0.647246	35.0889	185.764	0	1
6.61458	10.1615	2.91231	37.5243	71.9524	0	1
5.89504	3.86525	1.10779	30.1319	96.8737	0	1
6.05065	3.01797	0.864961	44.9428	80.3156	0	1
6.07901	8.10617	2.32326	29.4012	69.1338	0	1
6.09921	2.72817	0.781904	30.7381	156.223	0	1
6.22917	2.82143	0.80863	31.0714	106.144	0	1
5.79837	8.8	2.52211	33.7691	78.7311	0	1
5.76718	21.331	6.11353	35.2482	41.3977	0	1
6.86115	21.2433	6.0884	34.3287	21.1621	0	1
6.46141	3.86864	1.10876	30.9343	131.719	0	1
6.21186	38.3407	10.9886	31.7847	19.383	0	1
5.94279	5.14428	1.47437	43.7463	62.2209	0	1
6.25495	5.77143	1.65411	39.8989	47.3492	0	1
6.05623	3.14619	0.901709	28.7413	143.548	0	1
6.03505	2.65187	0.760034	23.8505	156.105	0	1
6.63957	49.0706	14.0638	32.7101	12.2871	0	1
6.8	4.78898	1.37254	29.8205	183.971	0	1
7.0031	9.36434	2.68385	36.6341	57.6999	0	1
7.58333	30.9405	8.86764	44.4167	38.4666	0	1
7.68779	58.0599	16.6401	43.3216	19.1399	0	1
6.14286	6.56916	1.88274	70.0476	46.6197	0	1
7.26295	4.59163	1.31598	35.0916	95.5835	0	1
7.92771	77.1249	22.1042	43.943	8.82691	0	1
6.14795	4.22329	1.21041	70.2315	61.2802	0	1
6.65254	3.01977	0.865477	50.4576	94.2481	0	1
7.96366	60.1852	17.2493	45.7843	15.334	0	1
7.58491	5.16981	1.48168	38.8984	108.154	0	1
6.59184	7.03741	2.01695	52.8197	45.1087	0	1
7.26774	3.166	0.907385	52.925	89.8816	0	1
7.08623	6.27988	1.79983	66.1029	54.8666	0	1
6.95631	3.42718	0.982242	25.3139	210.654	0	1
6.66463	14.2976	4.09773	41.0573	48.9624	0	1
8.24472	56.6819	16.2452	43.8398	13.5361	0	1
7.07977	5.05128	1.44771	36.8376	103.316	0	1
6.18209	2.36716	0.678437	21.2418	215.31	0	1
6.12159	2.62531	0.752422	33.0471	140.112	0	1
6.20557	2.58188	0.739976	41.493	120.7	0	1
5.40179	3.65774	1.04832	30.0446	91.8	0	1
6.017	4.32921	1.24077	59.0649	84.5644	0	1
6.30402	8.90955	2.5535	35.0402	67.0111	0	1
5.27373	5.30674	1.52093	29.4278	103.844	0	1
6.40791	2.33942	0.670486	39.825	120.378	0	1
6.13333	3.53333	1.01266	30.3333	130.548	0	1
6.52	2.81429	0.806583	25.2743	184.512	0	1
6.2577	16.4384	4.7113	31.5062	33.3477	0	1
7.05362	5.23324	1.49986	39.6166	93.5099	0	1
6.67947	5.1226	1.46815	39.9572	84.0674	0	1
7.66359	28.6966	8.22453	42.7902	32.0845	0	1
7.5675	41.5974	11.9219	38.0884	23.8727	0	1
7.13785	6.67119	1.91198	49.0768	60.821	0	1
7.0119	3.38542	0.970271	26.9613	177.537	0	1
6.42356	3.51629	1.00778	27.6466	157.773	0	1
6.021	1.74541	0.500239	28.2021	200.405	0	1
5.83014	3.48804	0.999683	25.3469	174.107	0	1
8.58403	37.8236	10.8404	48.0283	31.1263	0	1
6.52221	49.242	14.1129	34.389	10.9012	0	1
6.02548	2.44904	0.701904	22.7038	200.616	0	1
6.34507	4.44836	1.27491	29.3756	111.843	0	1
6.54353	4.15294	1.19025	30.2918	106.343	0	1
5.95755	2.51258	0.720113	39.8019	132.653	0	1
6.49302	3.86744	1.10842	26.2698	178.153	0	1
5.68639	2.17554	0.623517	29.3245	198.095	0	1
6.26047	2.11163	0.605199	37.6163	135.015	0	1
6.44955	5.84291	1.6746	31.1405	118.007	0	1
6.26846	2.9396	0.842498	25.2036	193.424	0	1
6.5125	3.41458	0.978631	21.5083	185.465	0	1
5.60097	7.50365	2.15057	33.4574	68.5697	0	1
5.82325	3.38535	0.970252	28.3137	117.426	0	1
6.92889	26.6237	7.63044	42.8252	45.56	0	1
7.26589	52.893	15.1593	41.9264	2.28079	0	1
7.21098	7.52487	2.15665	40.2316	53.678	0	1
5.44071	2.60531	0.74669	42.1876	152.214	0	1
7.12064	11.4021	3.26789	37.2976	70.6808	0	1
6.43253	7.84083	2.24721	62.8374	48.0797	0	1
7.63253	11.3072	3.24069	41.7446	45.4991	0	1
5.59128	1.90736	0.546655	33.7929	192.624	0	1
6.29412	2.89076	0.8285	45.1625	96.9239	0	1
7.02961	4.40132	1.26143	40.5625	115.228	0	1
7.05707	4.54591	1.30287	30.6055	162.321	0	1
6.66413	6.6616	1.90923	54.0659	41.929	0	1
6.9766	4.41489	1.26532	25.8191	141.821	0	1
6.55204	4.19683	1.20283	34.3778	93.1488	0	1
6.78095	4.56463	1.30824	30.9946	127.993	0	1
6.35995	3.71042	1.06342	27.0284	135.546	0	1
6.16852	3.97774	1.14003	24.5851	168.872	0	1
5.96009	1.97418	0.565806	33.6573	149.269	0	1
5.95798	2.39496	0.686403	37.888	138.091	0	1
6.13576	2.93881	0.842274	35.7361	166.579	0	1
6.56023	4.64245	1.33054	29.2275	137.838	0	1
4.78731	1.36194	0.390336	28.2052	188.439	0	1
6.32905	11.0369	3.16322	32.2793	73.8199	0	1
6.59701	11.7666	3.37235	39.6635	64.1457	0	1
7.71399	72.5648	20.7973	43.2706	13.7521	0	1
7.12611	31.5414	9.03987	41.2815	31.7495	0	1
7.76756	24.0552	6.89429	42.0301	35.9453	0	1
6.11566	6.6548	1.90729	30.7402	78.5341	0	1
5.98478	1.97826	0.566976	33.2913	188.371	0	1
6.96653	10.1075	2.89684	38.1349	66.7596	0	1
7.08929	5.03214	1.44223	28.1071	162.281	0	1
6.48033	7.97713	2.28627	34.4895	2.38	0	1
6.27099	2.07364	0.594311	34.732	159.333	0	1
5.39379	1.78758	0.512327	27.0196	193.752	0	1
5.91249	10.5851	3.03371	37.8879	42.8049	0	1
5.61983	6.92975	1.98609	35.3048	87.7925	0	1
5.29698	2.20134	0.630912	45.8272	146.905	0	1
5.50619	2.31889	0.6646	36.0789	177.585	0	1
6.36225	20.5875	5.90045	36.9148	47.9593	0	1
7.45652	21.0366	6.02916	42.2014	43.6751	0	1
6.23158	4.57193	1.31033	28.1526	145.059	0	1
6.76543	3.8321	1.09829	27.2494	129.829	0	1
6.61952	4.19522	1.20236	31.9104	162.914	0	1
6.93256	9.0295	2.58788	41.2729	10.474	0	1
5.59459	3.12162	0.894667	53.8041	75.14	0	1
6.02696	13.6863	3.92253	32.6593	53.5627	0	1
5.37173	1.96073	0.561952	67.5157	100.737	0	1
6.91093	40.6275	11.644	44.8806	35.0744	0	1
6.16154	3.45385	0.989883	49.8615	67.5223	0	1
5.31	3.62333	1.03846	55.1633	63.3861	0	1
5.56616	1.86117	0.533418	35.462	170.985	0	1
6.61876	3.48303	0.998249	26.1617	174.172	0	1
6.45659	3.98392	1.14181	26.5177	171.507	0	1
5.9145	4.5948	1.31688	21.4424	204.625	0	1
6.25832	4.03914	1.15763	28.8043	144.644	0	1
5.4585	3.30237	0.94647	29.3557	156.669	0	1
5.32494	3.65239	1.04679	25.9773	216.266	0	1
5.20551	3.32839	0.953927	24.3093	177.002	0	1
5.35625	2.22083	0.636498	23.5188	186.48	0	1
54.9666	26.3992	17.8603	61.8136	34.8363	1	2
50.4983	27.696	18.7376	59.864	35.2683	1	2
47.2424	18.4262	12.4662	61.2346	42.7982	1	2
41.672	11.535	7.80396	53.9431	39.912	1	2
26.6592	4.70582	3.18371	69.1169	70.426	1	2
49.4469	14.8153	10.0232	58.1768	40.6709	1	2
44.1449	4.97842	3.36813	60.7533	72.4671	1	2
50.8652	2.06786	1.399	48.8944	134.427	1	2
47.4322	12.4991	8.45626	45.9588	44.7265	1	2
42.1702	7.09763	4.80188	51.8826	48.7162	1	2
63.0285	23.6105	15.9736	57.2986	34.1696	1	2
46.2201	5.71778	3.86835	56.6933	70.2904	1	2
50.9467	11.5115	7.78806	55.7897	52.0822	1	2
52.1982	2.43225	1.64553	58.0224	129.661	1	2
64.6944	26.4394	17.8875	64.0833	38.3839	1	2
9.8174	30.9691	20.952	66.5713	10.7517	0	2
7.23585	1.65723	1.1212	100.365	91.1714	0	2
7.33598	1.32207	0.894441	91.4473	90.3147	0	2
8.2834	1.3502	0.913475	65.5061	113.441	0	2
8.76101	8.18658	5.53861	84.3323	46.0195	0	2
7.95108	4.61006	3.11892	70.1846	67.8443	0	2
7.44048	1.95238	1.32088	80.3505	102.43	0	2
8.87026	3.05166	2.06459	77.2135	76.2305	0	2
7.89142	2.70873	1.83258	114.081	61.9304	0	2
6.85969	2.15145	1.45556	100.835	64.5105	0	2
6.94013	1.05765	0.71555	102.412	118.592	0	2
8.50969	1.71512	1.16036	80.6919	182.027	0	2
6.84571	0.971429	0.657217	110.9	93.1588	0	2
8.97294	14.0884	9.5315	82.5005	48.3828	0	2
6.23208	0.87372	0.591113	87.9471	100.129	0	2
6.99078	1.73502	1.17382	108.855	65.372	0	2
8.87558	5.0553	3.42015	113.424	50.4267	0	2
6.56907	1.38431	0.93655	74.4247	88.1643	0	2
8.36703	3.49218	2.36262	81.3201	76.1236	0	2
6.98587	1.43816	0.972984	67.083	182.135	0	2
7.62755	1.34439	0.909541	67.7487	169.555	0	2
6.1991	1.01647	0.687688	109.25	156.546	0	2
6.98214	3.29821	2.2314	99.6911	46.1261	0	2
6.09018	0.872786	0.590481	99.8519	182.887	0	2
8.63277	5.33804	3.61144	76.323	64.3993	0	2
7.38198	1.25946	0.852083	73.8757	176.006	0	2
9.65905	4.61687	3.12353	90.7944	75.4256	0	2
6.83623	1.15136	0.778952	86.0521	190.091	0	2
8.94648	9.22795	6.24314	76.7126	48.52	0	2
6.38277	1.06131	0.718025	55.6802	174.529	0	2
9.03827	2.09506	1.41741	85.5185	134.623	0	2
7.65865	1.40469	0.95034	76.7202	165.147	0	2
7.41869	1.48224	1.00281	52.1832	199.015	0	2
6.67677	0.983165	0.665157	54.2997	191.315	0	2
7.74492	2.04188	1.38143	70.3832	161.857	0	2
6.19704	0.881773	0.596561	84.7176	97.3921	0	2
7.16608	1.3637	0.922607	61.1065	143.656	0	2
6.47583	0.890585	0.602523	87.6514	178.716	0	2
8.17595	4.16329	2.81666	80.5848	68.1664	0	2
7.22629	1.40194	0.948478	76.5216	168.25	0	2
8.84522	19.7861	13.3862	67.9826	28.56	0	2
9.01453	1.84593	1.24886	82.3576	128.039	0	2
8.1869	11.1514	7.54447	70.2715	45.9113	0	2
9.172	2.7	1.82668	82.09	96.5654	0	2
8.41488	1.64817	1.11507	79.459	151.808	0	2
6.07425	1.17485	0.794841	97.2862	188.835	0	2
9.56986	21.3507	14.4447	63.3507	35.0051	0	2
6.48045	1.08071	0.731148	121.792	109.923	0	2
7.51719	4.63229	3.13396	81.6383	66.3096	0	2
6.0261	1.17269	0.79338	121.458	171.118	0	2
8.40459	2.24677	1.52005	85.9584	99.0918	0	2
8.47772	3.25487	2.20208	85	90.0172	0	2
7.78352	1.96089	1.32664	68.1983	204.313	0	2
6.44784	1.63677	1.10735	73.5159	217.233	0	2
8.35392	2.26711	1.53381	57.6962	206.811	0	2
8.10692	1.80143	1.21875	77.4969	121.874	0	2
7.98544	2.33624	1.58058	82.4556	89.3392	0	2
8.9972	12.7843	8.64919	61.1989	42.2093	0	2
5.99854	1.75983	1.1906	103.993	186.368	0	2
7.75356	1.65925	1.12256	71.9422	176.166	0	2
7.73853	17.6008	11.9078	66.42	35.6789	0	2
8.22722	1.90296	1.28744	79.8722	113.412	0	2
6.06004	1.01656	0.687753	92.029	136.442	0	2
6.10764	1.20139	0.812796	103.604	167.413	0	2
6.7715	1.59951	1.08214	69.4668	154.185	0	2
6.14357	2.08714	1.41205	63.0593	191.898	0	2
8.26133	27.1208	18.3485	74.7568	22.9846	0	2
7.70474	5.50139	3.72195	64.1379	56.8461	0	2
6.88468	1.2685	0.858201	89.9157	124.852	0	2
6.74403	1.55315	1.05078	68.4599	175.776	0	2
9.30229	18.6029	12.5858	77.4444	41.98	0	2
6.66058	2.54015	1.71853	62.129	194.515	0	2
8.9172	2.0552	1.39044	85.0488	109.466	0	2
6.31808	1.55229	1.0502	74.634	158.623	0	2
7.14038	2.29653	1.55371	66.0946	182.482	0	2
7.74954	2.22652	1.50634	93.9024	130.895	0	2
7.72677	1.60509	1.08592	66.7058	145.839	0	2
5.4396	22.8139	15.4346	62.4851	6.35172	0	2
6.33832	1.17964	0.798082	96.0958	119.344	0	2
7.1897	3.46341	2.34316	70.7818	86.7053	0	2
9.25645	22.5599	15.2629	69.8088	28.3426	0	2
9.33852	18.0486	12.2108	81.3813	48.0364	0	2
6.87305	1.54631	1.04615	74.9136	107.42	0	2
7.294	2.192	1.48299	71.866	186.596	0	2
7.35661	3.11222	2.10556	63.8167	196.369	0	2
6.80502	1.38848	0.939371	60.2083	156.396	0	2
7.38592	26.5837	17.9851	56.3604	17.7387	0	2
5.99506	1.45634	0.985284	116.614	94.1947	0	2
7.31813	1.98274	1.34141	75.1615	114.585	0	2
6.86795	4.13644	2.79849	62.5638	77.0293	0	2
6.98745	2.26349	1.53136	65.2673	169.562	0	2
6.62195	1.6875	1.14167	62.3034	132.055	0	2
7.20919	5.14148	3.47845	66.6602	68.6093	0	2
6.82746	2.0669	1.39836	73.6256	147.368	0	2
6.69338	2.5993	1.75855	87.4355	188.17	0	2
5.93487	1.55556	1.05241	116.594	102.646	0	2
6.47525	1.53713	1.03994	71.2698	93.2772	0	2
8.57714	25.712	17.3954	74.3703	22.8079	0	2
7.12642	3.74611	2.53442	61.9523	71.839	0	2
7.00705	2.20564	1.49222	74.9107	127.668	0	2
7.17093	2.49651	1.68901	77.2244	120.726	0	2
6.91767	1.80522	1.22132	59.5482	134.871	0	2
7.75108	13.5367	9.15821	68.9309	57.6809	0	2
6.83224	2.14912	1.45398	70.0504	166.188	0	2
6.49667	1.56	1.05541	62.9867	101.304	0	2
8.32293	8.11733	5.49175	73.9774	45.8408	0	2
6.37068	1.90052	1.28579	80.5382	97.1068	0	2
7.0664	1.9429	1.31446	63.5883	116.99	0	2
6.69722	1.99722	1.35121	66.0722	104.518	0	2
6.45843	2.52809	1.71037	58.4978	192.281	0	2
6.14027	2.77376	1.87658	80.7941	58.5432	0	2
6.25174	1.95828	1.32487	70.1154	146.975	0	2
8.3803	16.275	11.0108	61.7729	39.2063	0	2
7.38971	3.168	2.1433	76.7623	91.6368	0	2
6.39305	21.9572	14.8551	56.6618	7.07494	0	2
6.84264	1.95939	1.32562	63.3274	119.03	0	2
5.83942	2.96788	2.00791	59.727	191.302	0	2
5.46319	1.82362	1.23376	70.727	42.3037	0	2
6.34988	2.1253	1.43786	66.013	156.332	0	2
5.07589	1.49107	1.00878	60.529	180.901	0	2
8.11851	6.58722	4.45656	74.3795	60.9397	0	2
7.54467	1.8536	1.25405	71.9975	129.202	0	2
6.53448	2.0768	1.40505	72.46	146.656	0	2
6.42222	2.78307	1.88288	59.6772	168.745	0	2
6.45304	2.36015	1.59675	54.9325	114.048	0	2
7.65138	19.5619	13.2346	55.6376	29.0496	0	2
7.47143	3.72987	2.52343	72.9364	99.0585	0	2
7.30993	16.9274	11.4522	53.4891	17.2632	0	2
5.74818	4.33759	2.93458	71.3358	48.1433	0	2
6.24497	2.82012	1.90794	65.6568	160.026	0	2
6.05574	2.19672	1.48619	117.082	80.8121	0	2
6.56113	2.54569	1.72228	71.0154	120.143	0	2
6.38728	1.72062	1.16408	53.6262	181.641	0	2
6.50196	1.04594	0.70763	62.13	139.341	0	2
6.83642	1.06914	0.723323	59.3541	156.805	0	2
5.70322	0.730382	0.494138	98.5684	137.097	0	2
6.07169	1.09218	0.73891	97.9721	99.5713	0	2
8.61584	15.5232	10.5022	76.4006	46.1311	0	2
7.22331	1.42209	0.962108	59.427	168.083	0	2
6.9018	0.961924	0.650787	101.675	111.953	0	2
7.58589	1.87014	1.26524	73.5644	88.3961	0	2
7.0821	1.25717	0.850535	67.91	129.991	0	2
9.02899	6.42556	4.34719	93.0026	61.7154	0	2
7.01025	1.85927	1.25789	65.0485	98.0957	0	2
6.95577	1.55481	1.0519	68.6942	85.0469	0	2
9.15559	29.0481	19.6524	70.1372	20.3234	0	2
6.48297	20.9599	14.1804	60.7275	28.3426	0	2
6.89863	1.24932	0.84522	55.5685	160.631	0	2
7.89832	4.44804	3.00931	78.0246	58.7964	0	2
6.95203	1.36624	0.924323	59.8681	135.58	0	2
7.43109	2.35973	1.59647	72.8143	68.235	0	2
6.38042	1.0951	0.74089	118.173	122.589	0	2
6.50906	1.05978	0.716993	105.658	108.313	0	2
7.0879	4.24891	2.87459	60.1636	60.227	0	2
7.54242	2.98201	2.01747	79.937	81.0406	0	2
6.31715	2.03822	1.37895	102.115	41.8352	0	2
6.24928	0.968116	0.654976	56.6362	161.165	0	2
7.233	1.41026	0.954105	69.233	123.869	0	2
7.28419	1.94979	1.31912	70.9209	82.0415	0	2
7.40749	1.46203	0.989133	71.4246	138.862	0	2
5.85219	1.25138	0.846619	69.5455	194.844	0	2
7.28148	1.61728	1.09417	66.5222	183.308	0	2
6.54545	1.21212	0.820057	63.4976	146.625	0	2
7.27133	2.12539	1.43792	64.926	168.317	0	2
7.56753	19.8065	13.4	57.061	25.6829	0	2
7.71907	7.22552	4.8884	72.8711	49.5992	0	2
7.01798	1.54683	1.0465	66.6878	137.234	0	2
8.22538	47.8172	32.3506	60.1349	6.8	0	2
7.06691	4.44486	3.00715	70.2515	62.5905	0	2
8.24329	6.03983	4.08623	67.8935	50.3131	0	2
5.7953	0.879195	0.594816	83.3624	160.27	0	2
6.54949	1.78043	1.20455	59.9863	169.051	0	2
6.54916	2.68825	1.81873	66.2302	77.9186	0	2
7.49191	18.2534	12.3493	62.5202	30.4105	0	2
7.24252	2.63034	1.77955	71.7425	104.798	0	2
6.00224	1.52744	1.03338	93.7615	78.9071	0	2
6.94894	1.80732	1.22274	67.4566	135.079	0	2
7.32868	2.3319	1.57764	72.4275	95.6869	0	2
6.7943	1.55019	1.04877	58.1388	124.478	0	2
7.18467	6.63531	4.4891	64.0511	55.4575	0	2
7.08151	2.22141	1.50289	72.9745	166.499	0	2
7.04592	2.96439	2.00555	68.5895	84.1457	0	2
6.91414	2.34848	1.58886	77.303	127.16	0	2
6.05852	1.43627	0.971703	63.4565	139.963	0	2
6.68394	36.6245	24.7782	48.134	4.42	0	2
8.04895	17.8921	12.1049	72.8112	32.7002	0	2
6.73724	1.71739	1.1619	65.5198	118.201	0	2
6.85794	5.81879	3.93669	61.6197	54.1444	0	2
7.43341	12.9181	8.73972	69.0502	42.3051	0	2
6.60668	5.52699	3.73927	54.0437	47	0	2
6.36968	1.69357	1.14578	62.7961	155.127	0	2
7.11415	12.8039	8.66244	65.48	38.0344	0	2
5.60718	1.79329	1.21324	73.9205	74.5213	0	2
7.23398	5.43825	3.67923	64.2563	53.4676	0	2
5.47427	1.11074	0.751467	98.5503	126.455	0	2
5.99595	1.83704	1.24285	52.1549	176.195	0	2
6.53294	1.75563	1.18777	61.1293	112.223	0	2
7.9538	33.3146	22.5389	70.4015	16.1527	0	2
6.41848	10.675	7.22214	78.8837	23.8024	0	2
5.49732	2.53483	1.71493	93.7406	32.5442	0	2
5.46337	1.67582	1.13377	73.2839	75.4195	0	2
6.65756	2.44853	1.65655	65.209	138.191	0	2
8.86693	14.552	9.84514	60.4321	19.8252	0	2
7.51677	2.81505	1.90451	69.7607	74.2517	0	2
5.84972	0.995787	0.673696	108.295	89.0183	0	2
6.06233	0.948759	0.64188	46.0882	190.335	0	2
7.15157	1.36892	0.92614	66.9971	143.654	0	2
7.17541	2.12869	1.44016	70.2803	85.907	0	2
8.6258	13.1469	8.89447	69.1928	38.4936	0	2
7.01034	1.06015	0.717241	65.2895	139.02	0	2
7.07432	1.34846	0.912293	57.5405	195.606	0	2
6.41677	1.56946	1.06181	60.4706	185.575	0	2
7.11873	1.48516	1.00478	64.1105	141.386	0	2
8.03796	10.2627	6.94322	73.2338	44.3306	0	2
6.71271	1.5989	1.08173	56.2663	186.435	0	2
6.67554	1.41646	0.958305	66.3232	141.493	0	2
7.1054	2.39032	1.61716	72.5073	80.1888	0	2
7.03832	2.1497	1.45437	80.3856	77.432	0	2
6.83664	1.48191	1.00258	60.6114	153.75	0	2
5.79684	1.06998	0.72389	85.9018	209.269	0	2
5.7674	0.898132	0.607629	88.2954	99.8935	0	2
7.56623	16.9597	11.4741	57.4649	25.4887	0	2
7.93571	5.90089	3.99223	69.5875	49.9013	0	2
6.91057	1.72358	1.16608	67.4167	85.8316	0	2
7.13725	1.25144	0.846659	66.8604	143.117	0	2
5.34122	0.77798	0.52634	92.3439	132.386	0	2
7.17233	5.33738	3.61099	76.3167	58.6734	0	2
7.03188	1.55372	1.05116	73.0236	91.3031	0	2
7.29082	1.33265	0.901602	74.2898	102.015	0	2
6.29589	2.27899	1.54184	54.8635	174.171	0	2
6.74545	1.55394	1.05131	62.1588	132.213	0	2
7.54067	8.72421	5.90233	60.0357	45.5714	0	2
8.02648	27.8093	18.8143	54.2214	16.8806	0	2
6.28839	1.45506	0.984414	67.2547	155.353	0	2
6.41118	1.6965	1.14776	52.3753	198.662	0	2
7.20676	14.4243	9.75873	62.0432	39.44	0	2
4.86484	0.93144	0.630163	78.5044	184.355	0	2
7.41991	3.85584	2.60865	72.7014	69.9682	0	2
6.65444	2.60111	1.75977	52.9189	204.721	0	2
6.47668	1.65598	1.12035	61.1895	167.78	0	2
6.99251	1.92634	1.30326	72.2871	151.695	0	2
6.0037	1.28343	0.868298	72.9131	146.2	0	2
5.7016	0.966252	0.653715	90.4636	139.12	0	2
6.23388	2.09735	1.41895	52.9735	60.4129	0	2
6.80562	21.5494	14.5792	47.7124	15.3942	0	2
6.17748	1.88344	1.27424	55.7616	180.515	0	2
6.93635	1.93312	1.30784	66.0259	116.872	0	2
6.90939	3.29171	2.227	62.1978	65.9609	0	2
5.16491	1.29708	0.877533	82.5029	186.771	0	2
5.22137	1.1374	0.769508	50.2557	197.227	0	2
6.97727	1.98601	1.34363	65.6941	96.3827	0	2
5.71136	1.54773	1.04711	100.055	104.923	0	2
6.00977	1.83279	1.23997	58.0695	153.123	0	2
6.90523	34.6944	23.4724	56.3889	10.8853	0	2
7.14914	2.44742	1.6558	66.4903	107.406	0	2
5.20296	1.46074	0.98826	53.1852	143.561	0	2
5.87094	1.32869	0.898922	60.5757	133.766	0	2
8.04111	23.8547	16.1388	67.5621	19.676	0	2
6.4452	2.88023	1.94861	59.9028	80.2954	0	2
5.64724	1.74488	1.18049	69.7134	49.7145	0	2
6.0858	2.50986	1.69804	53.3807	169.721	0	2
7.59681	24.5	16.5754	63.1128	23.2048	0	2
5.71541	1.78616	1.20842	53.7154	151.539	0	2
8.5929	47.8319	32.3606	61.2328	4.26019	0	2
6.03189	5.07517	3.43359	80.9453	61.5184	0	2
5.00103	0.867147	0.586666	94.1936	89.9922	0	2
6.61871	3.42158	2.31486	79.2547	27.5421	0	2
6.21005	4.2711	2.8896	91.4075	34.6683	0	2
5.0415	1.03752	0.701932	77.2536	80.6022	0	2
5.10332	0.655612	0.443552	63.2577	108.997	0	2
8.62576	10.5516	7.13868	67.4386	37.6925	0	2
10.3698	42.3918	28.68	65.2371	2.58936	0	2
5.74423	1.00802	0.681976	54.7111	183.068	0	2
6.81177	1.71144	1.15787	61.51	111.742	0	2
6.17225	0.980861	0.663599	53.8517	191.837	0	2
5.87583	1.14073	0.771756	66.3262	96.0131	0	2
10.116	55.4641	37.5241	75.5547	1.40186	0	2
7.31556	5.19433	3.5142	66.4024	55.0506	0	2
6.9281	4.7228	3.1952	70.2034	63.6518	0	2
6.28759	1.17659	0.796018	64.3703	121.065	0	2
6.79529	1.20368	0.814349	69.7799	112.256	0	2
8.13737	25.7881	17.4469	60.7078	23.2397	0	2
5.93458	1.40187	0.94843	49.7134	202.455	0	2
7.6066	5.47335	3.70298	79.231	57.0927	0	2
6.22928	1.11971	0.757533	59.2219	162.063	0	2
6.44683	2.27358	1.53819	62.6552	72.1449	0	2
6.7198	1.46436	0.990706	66.4891	106.765	0	2
6.23271	0.8573	0.580003	52.1284	157.632	0	2
5.95881	1.44157	0.97529	54.5747	197.51	0	2
6.4713	0.94526	0.639513	56.0214	132.785	0	2
6.6803	1.69981	1.15	68.0297	92.0553	0	2
6.80149	1.61125	1.09009	65.1414	102.787	0	2
7.42045	4.51623	3.05544	66.7532	52.3699	0	2
6.753	1.403	0.949195	73.442	115.905	0	2
7.00364	1.5323	1.03667	63.5214	154.014	0	2
6.23574	0.968468	0.655214	57.2177	108.016	0	2
7.3271	2.03011	1.37347	73.9148	88.1709	0	2
6.55451	1.59086	1.07629	69.3962	162.462	0	2
6.73371	3.55955	2.4082	59.082	57.3472	0	2
7.76664	10.7587	7.27873	62.4791	39.5761	0	2
7.87917	35.8285	24.2397	53.8987	4.08	0	2
5.19931	0.841924	0.569601	83.1873	113.748	0	2
5.77288	1.11466	0.754122	86.0827	129.948	0	2
6.17655	2.0527	1.38875	62.8314	172.277	0	2
6.60846	4.69848	3.17874	62.898	56.2317	0	2
6.90464	12.8325	8.68177	59.8943	38.0132	0	2
6.18982	1.80333	1.22004	59.2984	152.06	0	2
6.02616	1.44725	0.979135	60.0715	139.664	0	2
5.91207	1.66258	1.12481	62.7004	149.871	0	2
4.94545	1.51273	1.02343	57.26	173.75	0	2
5.32767	1.27373	0.861736	94.3077	116.108	0	2
5.97225	2.35145	1.59086	56.4879	172.277	0	2
7.22509	14.1993	9.60648	66.5943	32.894	0	2
6.444	3.373	2.28199	53.101	66.4959	0	2
5.8999	2.50442	1.69435	54.2493	177.973	0	2
7.07909	6.64182	4.4935	59.5227	47.2649	0	2
6.44834	2.62183	1.77379	67.7329	100.239	0	2
4.76383	0.572432	0.387277	65.2722	190.25	0	2
7.73445	15.4067	10.4233	65.5857	20.3347	0	2
5.92369	1.17806	0.797013	52.5707	146.711	0	2
6.33018	1.228	0.830802	61.6348	121.161	0	2
7.90356	10.209	6.90684	63.3467	40.5969	0	2
6.20997	1.06495	0.720492	53.6994	126.261	0	2
8.42173	28.1257	19.0283	72.0096	19.956	0	2
5.23955	0.820591	0.555168	90.4149	142.568	0	2
7.66526	21.1617	14.3169	66.9902	29.8058	0	2
6.80328	4.44536	3.00749	61.3652	75.4785	0	2
6.69281	1.20915	0.818047	67.5305	132.677	0	2
9.4112	26.6216	18.0108	81.4826	31.7532	0	2
5.73427	1.10373	0.746725	65.0268	192.672	0	2
6.42529	1.26628	0.8567	53.3333	182.657	0	2
6.65555	2.07339	1.40275	59.6672	89.343	0	2
6.59264	3.94481	2.66885	55.4363	63.2299	0	2
5.01457	0.746812	0.505254	103.199	109.099	0	2
6.89904	3.3135	2.24174	70.7875	76.2882	0	2
6.51917	1.32539	0.896688	62.6093	183.449	0	2
5.98142	1.8306	1.23849	59.6656	170.438	0	2
5.05631	0.970803	0.656794	82.3827	192.259	0	2
8.53524	14.7544	9.98205	76.3524	37.815	0	2
6.53995	1.26804	0.857889	59.5232	124.884	0	2
6.40228	1.34268	0.908387	57.8195	168.296	0	2
6.81204	11.5698	7.82748	54.2717	33.7988	0	2
5.43287	0.950591	0.643119	101.547	113.644	0	2
5.89041	1.318	0.891691	55.4775	178.438	0	2
6.24721	1.32219	0.894523	57.7335	140.42	0	2
6.68792	2.28971	1.5491	62.5089	88.8747	0	2
5.74242	1.12121	0.758553	105.217	107.154	0	2
6.85932	3.20281	2.16685	62.0586	71.8881	0	2
7.98179	47.8619	32.3808	58.434	2.04	0	2
6.35872	1.56313	1.05753	63.9198	124.851	0	2
5.89705	1.89346	1.28102	54.7986	162.567	0	2
5.3708	1.43487	0.97076	88.3803	74.46	0	2
5.88923	2.36484	1.59992	51.8984	191.713	0	2
5.23196	1.54467	1.04504	54.6976	155.9	0	2
5.4108	3.60393	2.43823	61.4124	42.5544	0	2
6.11817	3.51715	2.37952	48.2859	63.6418	0	2
5.46918	1.25	0.845684	64.2397	74.4033	0	2
5.70097	2.13213	1.44248	49.0278	167.026	0	2
6.05492	2.52235	1.70649	48.5734	64.7832	0	2
6.02026	3.0537	2.06597	54.4924	174.553	0	2
7.09434	13.1698	8.91	58.7493	26.6353	0	2
7.08689	5.60097	3.78932	60.5237	53.9305	0	2
6.34911	3.1075	2.10237	67.9103	88.1886	0	2
5.53179	1.27283	0.861131	65.4116	120.27	0	2
6.48082	3.61085	2.44291	65.9308	78.058	0	2
7.66259	17.2482	11.6692	60.4792	28.1729	0	2
4.97065	0.72912	0.493284	106.818	106.658	0	2
7.7512	11.3103	7.65193	62.1316	37.9538	0	2
5.78159	1.3944	0.94338	70.4603	90.6373	0	2
5.44831	0.831451	0.562516	73.3084	169.259	0	2
6.51081	2.0027	1.35492	62.6414	81.0207	0	2
6.91066	6.63452	4.48856	67.1462	55.0758	0	2
6.50569	1.28542	0.869646	71.8501	105.153	0	2
7.80846	45.0611	30.486	56.8707	9.91262	0	2
5.70605	1.17195	0.792879	56.4371	169.207	0	2
6.11635	1.30893	0.88555	55.5426	189.231	0	2
8.90507	41.9688	28.3939	60.5839	21.1129	0	2
6.25515	1.06181	0.718362	57.8193	147.092	0	2
4.90241	0.912048	0.617043	77.1241	209.444	0	2
6.44139	1.373	0.9289	57.9361	144.826	0	2
6.62329	1.10959	0.750689	55.3068	120.727	0	2
5.25854	0.747967	0.506035	68.4634	158.084	0	2
6.98936	28.9088	19.5582	58.5547	27.88	0	2
6.48397	1.49599	1.01211	50.8747	217.401	0	2
5.89979	0.96519	0.652996	46.2247	211.917	0	2
9.22636	34.9135	23.6206	69.1288	13.0314	0	2
7.0951	4.82059	3.26135	70.9588	53.9947	0	2
5.03292	1.05487	0.713669	46.6955	159.917	0	2
6.0625	1.03856	0.702637	50.7194	140.041	0	2
6.25085	4.07605	2.75764	60.6595	74.9058	0	2
4.90496	0.73812	0.499373	87.4372	166.735	0	2
7.80591	17.5804	11.894	61.158	28.9	0	2
6.89169	2.1735	1.47048	66.632	77.4223	0	2
5.90513	1.1182	0.756512	60.3841	133.239	0	2
6.13438	1.48789	1.00663	56.3971	167.651	0	2
5.0192	1.90103	1.28614	50.613	174.292	0	2
6.52495	1.82726	1.23622	62.0537	121.469	0	2
5.2267	2.3855	1.6139	82.5846	59.3687	0	2
6.62462	2.71572	1.83731	63.9369	100.265	0	2
7.43319	17.2495	11.6701	65.7756	30.6094	0	2
5.31407	1.87704	1.2699	43.077	189.271	0	2
7.12149	9.62103	6.50908	61.4878	31.2227	0	2
5.73118	6.84332	4.62983	44.4685	20.4	0	2
5.13839	2.8869	1.95313	57.9122	36.6901	0	2
6.29873	2.0715	1.40147	62.7649	100.886	0	2
8.24674	23.6418	15.9948	57.5528	14.0186	0	2
5.81829	1.64756	1.11465	49.5646	131.19	0	2
5.38507	0.853731	0.577589	49.1836	135.015	0	2
8.28338	20.5604	13.9101	70.1817	33.7612	0	2
5.98145	1.19922	0.811328	62.2285	147.02	0	2
5.51043	0.868277	0.58743	54.0143	153.966	0	2
7.62338	7.07143	4.78415	74.664	56.0175	0	2
8.90462	12.762	8.63412	60.5984	30.7282	0	2
6.39841	1.28246	0.867643	62.3459	117.41	0	2
5.9332	1.61316	1.09138	55.0608	146.44	0	2
6.82272	3.30361	2.23505	67.4809	75.1677	0	2
5.36232	0.797101	0.539277	85.8623	109.588	0	2
6.08081	1.7619	1.19201	62.3622	139.725	0	2
4.96193	0.708638	0.479427	59.1801	163.515	0	2
5.55514	1.15421	0.780874	67.8159	183.702	0	2
6.00829	1.46083	0.98832	45.5797	207.043	0	2
5.95657	1.30403	0.88224	53.4374	183.789	0	2
6.82054	5.36795	3.63167	63.1682	65.62	0	2
5.99196	2.34099	1.58379	49.3892	206.993	0	2
5.98913	1.84783	1.25014	52.2524	157.213	0	2
5.27027	1.61993	1.09596	60.451	147.536	0	2
7.24353	24.1447	16.335	66	21.7627	0	2
4.95175	0.929825	0.62907	62.807	82.6864	0	2
5.61757	2.85135	1.92907	47.8946	56.6587	0	2
5.80113	2.23921	1.51493	52.6989	157.844	0	2
7.86784	26.8409	18.1591	57.8388	11.9436	0	2
6.3739	2.32187	1.57085	62.3342	105.139	0	2
5.64685	1.03409	0.699611	53.2115	123.159	0	2
5.00135	0.903096	0.610987	45.1063	150.094	0	2
6.97273	14.7948	10.0094	53.9844	30.2218	0	2
5.16692	0.828614	0.560596	66.9702	111.373	0	2
7.59371	30.0201	20.31	58.7434	23.8024	0	2
5.91135	2.01243	1.3615	62.4466	90.8742	0	2
9.51435	39.1627	26.4954	64.3828	5.49287	0	2
5.4878	1.80894	1.22383	89.6463	55.5127	0	2
5.63131	0.962484	0.651165	47.6559	142.262	0	2
6.00209	1.84984	1.25151	59.1376	97.628	0	2
8.91321	34.9448	23.6418	71.0138	17.0983	0	2
6.66157	2.30019	1.55619	63.4054	90.4227	0	2
5.9989	1.42059	0.961097	59.0778	134.183	0	2
6.12667	1.46447	0.990782	62.0227	117.214	0	2
9.45059	4.19895	2.84078	89.5165	32.4767	0	2
6.90689	1.6644	1.12605	68.6809	112.893	0	2
6.0505	1.23663	0.836641	44.9099	205.574	0	2
5.09821	0.845982	0.572347	84.1752	131.479	0	2
5.71848	1.35893	0.919377	48.5961	202.437	0	2
6.79838	4.2695	2.88852	89.7913	39.7684	0	2
5.9949	1.20714	0.816689	66.9347	128.98	0	2
6.09074	1.05626	0.71461	58.9592	153.934	0	2
6.18224	1.37835	0.932521	60.5513	137.966	0	2
6.12234	1.36886	0.926098	58.1742	156.622	0	2
6.24668	1.74094	1.17783	58.3722	157.857	0	2
6.44828	2.36886	1.60265	58.8997	85.9131	0	2
7.9407	22.1329	14.974	64.3108	22.3108	0	2
5.6783	1.40894	0.953215	51.8735	156.632	0	2
6.26713	2.29096	1.54994	52.9732	186.957	0	2
5.17857	0.967857	0.654801	77.1286	150.58	0	2
6.69485	1.3207	0.893515	66.0476	109.971	0	2
8.47548	39.5495	26.7571	60.3083	11.4696	0	2
6.21755	2.31353	1.56521	53.309	172.75	0	2
5.37302	8.08558	5.47028	75.8809	11.256	0	2
5.91135	4.0573	2.74495	62.8681	93.0191	0	2
8.6068	16.1641	10.9358	72.335	39.459	0	2
5.67715	1.03669	0.701368	49.6468	179.128	0	2
5.56923	4.47179	3.02538	50.4744	68.4887	0	2
5.75139	1.44593	0.97824	55.6667	124.506	0	2
5.81904	1.26883	0.858422	52.8651	195.388	0	2
5.78084	1.47665	0.999021	49.7521	184.721	0	2
4.98248	1.25532	0.849282	38.5294	198.048	0	2
4.86	0.62	0.419459	61.185	169.555	0	2
5.71234	1.37373	0.92939	52.3069	206.756	0	2
6.90421	4.36973	2.95633	62.0316	72.6781	0	2
7.52128	14.196	9.60429	57.0258	19.6201	0	2
4.8941	0.950076	0.642771	53.708	145.901	0	2
6.21977	1.66877	1.129	54.3302	178.617	0	2
6.66906	35.9683	24.3343	54.0101	22.1	0	2
6.90476	1.93537	1.30937	63.1063	100.233	0	2
6.15392	1.53918	1.04133	57.7873	141.238	0	2
5.68017	1.89446	1.28169	62.2473	123.709	0	2
6.74229	1.66062	1.12349	64.069	111.835	0	2
5.55556	2.03671	1.37793	47.5556	191.341	0	2
5.61324	2.52091	1.70551	84.2439	54.0461	0	2
6.96373	7.67354	5.19151	66.3619	66.9835	0	2
5.1362	1.25495	0.849031	51.6333	198.439	0	2
7.93597	23.6705	16.0142	50.9756	20.8982	0	2
4.85202	0.7287	0.492999	76.1054	170.953	0	2
5.83188	1.09855	0.743221	52.0676	154.076	0	2
6.57731	2.40934	1.63003	60.2592	104.774	0	2
7.25025	3.55271	2.40357	62.1567	63.9236	0	2
6.28557	1.55488	1.05195	56.002	196.491	0	2
5.43634	2.34981	1.58976	88.33	47.9496	0	2
6.7472	1.92841	1.30466	61.9933	114.709	0	2
5.20758	3.15	2.13112	61.5409	36.9491	0	2
6.65197	1.57309	1.06427	67.9536	115.183	0	2
7.76541	26.7992	18.1309	58.6769	19.3591	0	2
6.59852	7.3437	4.96836	52.6089	29.3308	0	2
7.75135	42.8586	28.9958	53.118	4.15023	0	2
6.5425	5.95518	4.02896	60.3586	60.2577	0	2
5.18799	0.877285	0.593524	84.9687	104.292	0	2
6.93517	5.05379	3.41913	55.2593	57.1089	0	2
5.76254	1.06466	0.720292	54.0022	159.933	0	2
5.97583	2.37399	1.60612	53.2842	123.687	0	2
5.55216	0.958904	0.648744	53.0516	176.221	0	2
4.67208	0.784632	0.53084	92.6894	95.0457	0	2
6.8093	2.42312	1.63936	106.092	52.5319	0	2
5.45283	1.41195	0.95525	68.3805	151.385	0	2
6.57075	2.88561	1.95225	94.1592	50.32	0	2
6.75906	13.9323	9.42584	55.2724	28.9	0	2
6.92407	9.2149	6.23431	54.4699	25.7728	0	2
5.79978	1.8031	1.21988	74.4768	162.452	0	2
6.14004	1.78008	1.20431	61.5228	137.633	0	2
5.74923	4.08802	2.76574	76.7687	36.5005	0	2
6.99658	7.54214	5.10261	62.6298	55.0223	0	2
4.58662	1.67981	1.13647	79.1159	175.698	0	2
5.71846	7.23364	4.8939	115.793	43.7597	0	2
6.05758	2.83989	1.92132	58.986	135.149	0	2
4.74765	1.16196	0.786119	59.2448	169.341	0	2
4.90894	1.18709	0.803119	48.6474	189.165	0	2
6.59977	3.33333	2.25516	65.5204	123.005	0	2
6.825	4.75192	3.2149	69.401	127.128	0	2
5.04843	0.876513	0.593002	93.9588	130.28	0	2
8.2379	60.0775	40.6452	66.4799	6.45105	0	2
6.71463	2.13301	1.44308	64.8392	152.843	0	2
4.74543	3.64177	2.46383	51.6845	133.43	0	2
5.42358	32.3872	21.9115	68.4658	94.5206	0	2
7.82517	26.7371	18.0889	59.0895	14.7303	0	2
5.65083	1.45248	0.98267	50.064	189.997	0	2
5.17391	1.04577	0.70751	85.0847	143.271	0	2
7.54167	50.7663	34.3458	57.7337	13.2774	0	2
5.79121	3.42418	2.31662	65.989	41.1175	0	2
6.64569	22.2572	15.058	71.6867	38.7436	0	2
5.59238	18.893	12.782	63.2991	31.7222	0	2
6.1681	10.2281	6.91981	51.6552	8.6014	0	2
6.4186	20.0669	13.5762	55.3343	59.028	0	2
6.49114	11.8582	8.02265	49.0405	10.54	0	2
6.00254	3	2.02964	74.2392	144.66	0	2
5.15941	26.2297	17.7456	57.5129	95.3535	0	2
5.17624	17.5078	11.8449	55.0392	69.7033	0	2
4.53642	19.5792	13.2462	56.2555	112.195	0	2
5.61981	7.35942	4.979	42.3131	2.72	0	2
5.88592	17.7059	11.9789	52.0357	50.9229	0	2
3.98256	16.0625	10.867	58.2631	27.6134	0	2
40.4035	25.7472	14.8524	64.6521	35.0513	1	3
75.1371	12.26	7.07223	48.5657	46.7373	1	3
55.297	13.3737	7.7147	50.6085	51.931	1	3
38.9227	11.2715	6.50199	42.9656	36.2	1	3
172.127	2.97364	1.71536	49.2589	94.3958	1	3
51.3523	38.4067	22.1551	58.0147	24.6236	1	3
29.3017	9.84408	5.67859	57.9885	65.0814	1	3
41.0052	5.84337	3.37077	42.4802	50.3843	1	3
53.3427	4.73499	2.7314	61.148	65.2632	1	3
64.3453	4.39542	2.53551	57.9928	84.1862	1	3
43.8225	2.69101	1.55232	45.7281	92.2961	1	3
63.3711	14.4574	8.3398	65.741	62.5082	1	3
49.1518	4.45333	2.56892	57.9477	78.1978	1	3
53.3197	24.8159	14.3152	51.357	60.4904	1	3
68.0331	13.6754	7.88873	56.0025	62.3416	1	3
35.0169	19.8761	11.4656	46.7408	35.4596	1	3
56.4072	5.10526	2.94499	58.5803	102.112	1	3
38.24	3.45	1.99015	46.0856	88.5731	1	3
63.6409	3.8557	2.22418	44.6107	85.5963	1	3
71.2313	6.19544	3.57386	44.9137	81.1461	1	3
78.7354	2.5208	1.45413	56.8419	170.996	1	3
36.2477	7.18265	4.14334	57.8733	72.8053	1	3
34.3379	12.4688	7.19264	63.7129	61.4046	1	3
82.1014	2.72904	1.57426	57.3002	87.1488	1	3
42.4976	4.15534	2.39702	45.6772	96.1551	1	3
7.26269	12.2538	7.06865	100.349	3.5497	0	3
8.93725	6.26078	3.61156	135.286	41.9415	0	3
14.7785	13.7283	7.9192	102.89	56.5546	0	3
7.70906	9.02067	5.20361	108.555	16.1204	0	3
8.2825	12.7689	7.36576	98.8732	5.80992	0	3
9.32429	1.33292	0.768901	119.052	136.306	0	3
8.50071	2.23252	1.28784	109.923	80.955	0	3
12.6307	1.8922	1.09152	71.2202	152.89	0	3
14.3254	1.68955	0.974624	69.6657	169.776	0	3
9.00428	1.37045	0.790549	82.7109	189.452	0	3
11.5741	2.21495	1.2777	72.2537	130.986	0	3
12.1254	1.42122	0.819837	49.2669	173.063	0	3
10	1.52734	0.881054	88.7969	196.824	0	3
10.9863	1.69505	0.977799	65.1245	117.968	0	3
12.3989	33.9518	19.5852	92.9406	39.44	0	3
9.1769	1.66065	0.957952	72.2527	104.925	0	3
9.20776	1.60665	0.926801	82.4238	114.485	0	3
11.3997	1.70489	0.983472	61.1754	155.646	0	3
12.9827	13.5556	7.81957	73.7704	66.986	0	3
8.67917	1.27917	0.737892	101.875	171.156	0	3
8.22314	1.15702	0.667434	93.3526	157.57	0	3
11.3499	23.9201	13.7984	66.7851	35.2569	0	3
10.9082	40.789	23.5293	78.4274	23.085	0	3
8.64865	1.62162	0.935438	90.9257	83.9222	0	3
9.72086	16.6936	9.62977	63.422	54.6206	0	3
8.56098	2.61789	1.51014	58.5732	74.5748	0	3
8.71186	3.55508	2.05076	67.3347	62.4685	0	3
7.58153	1.08055	0.623319	78.5442	170.633	0	3
9.53974	2.43416	1.40416	91.1815	69.0744	0	3
8.03992	1.08745	0.627301	70.1749	174.45	0	3
11.6718	13.0535	7.52996	69.2356	55.6739	0	3
9.29365	10.1841	5.87475	97.0889	20.4283	0	3
12.3981	1.49827	0.864284	62.2815	154.203	0	3
11.3392	2.67491	1.54303	79.7032	71.682	0	3
11.2882	5.81765	3.35593	131.78	64.1015	0	3
9.74826	1.77431	1.02351	93.2049	86.7773	0	3
9.07013	1.41039	0.813588	60.6831	161.744	0	3
9.14943	1.54095	0.888902	65.4267	137.562	0	3
9.24086	15.5086	8.94619	60.0548	56.4779	0	3
7.58945	1.31827	0.760447	69.8606	116.447	0	3
8.27273	1.37338	0.792237	70.987	144.558	0	3
10.2055	1.60123	0.923674	75.1534	126.455	0	3
7.66135	1.14343	0.65959	76.5777	169.349	0	3
7.59302	18.4593	10.6483	52.0334	35.9726	0	3
7.95683	29.8665	17.2286	62.5703	25.9494	0	3
8.34014	1.75577	1.01282	57.4911	164.536	0	3
8.3411	16.0763	9.27366	59.4767	26.5744	0	3
8.09335	4.08922	2.35888	56.2522	87.5096	0	3
11.4484	1.84615	1.06496	62.1126	179.47	0	3
13.8901	5.40097	3.11557	80.4432	100.9	0	3
9.21739	4.64427	2.67906	78.6186	50.5092	0	3
11.4918	2.57861	1.48748	70.0046	104.26	0	3
11.7673	2.0193	1.16484	59.765	151.277	0	3
11.1898	3.1123	1.79534	61.3703	81.8355	0	3
12.1468	2.14677	1.23837	69.5771	132.731	0	3
11.2844	3.51146	2.0256	68.9458	95.2273	0	3
11.1351	2.46514	1.42203	69.4499	124.148	0	3
11.7876	2.65271	1.53023	67.738	88.4869	0	3
12.0324	2.06471	1.19104	72.7179	125.789	0	3
9.84165	10.6152	6.1234	71.8983	50.3935	0	3
10.4392	18.2307	10.5164	61.9047	37.9599	0	3
10.2877	16.1712	9.32843	72.5633	49.0473	0	3
9.23901	1.75526	1.01253	70.1568	98.29	0	3
7.61881	22.521	12.9913	54.6645	26.3582	0	3
6.53382	4.22893	2.43947	93.5369	48.4139	0	3
8.0114	22.2105	12.8122	63.6395	33.3217	0	3
11.4317	23.9393	13.8095	76.8395	45.2724	0	3
8.82244	3.00863	1.73554	63.3514	97.9489	0	3
7.76996	34.692	20.0122	59.1901	19.4722	0	3
8.11132	1.17996	0.680666	76.8275	169.05	0	3
9.12421	16.6022	9.57702	64.0513	46.6631	0	3
10.0547	3.62701	2.09225	67.985	87.571	0	3
7.88751	52.1816	30.1012	57.0485	11.0748	0	3
7.60488	1.14634	0.661271	70.1415	165.152	0	3
7.75578	1.09021	0.628891	91.1089	135.98	0	3
8.0917	1.67576	0.966671	94.5098	97.8497	0	3
9.73846	2.45128	1.41403	64.2744	72.5603	0	3
9.32523	1.89627	1.09387	59.0567	117.841	0	3
9.40566	1.54987	0.894046	48.2844	114.659	0	3
6.93638	31.5954	18.2259	52.1789	21.9741	0	3
7.84152	2.28209	1.31643	51.626	76.0826	0	3
6.84262	1.08634	0.626659	72.9005	166.176	0	3
8.75146	8.15922	4.70668	58.5806	60.2338	0	3
9.89962	3.88582	2.24155	66.8582	90.5511	0	3
8.00406	4.50203	2.59701	50.3897	73.4471	0	3
9.87976	2.25551	1.3011	60.1593	99.5742	0	3
9.40217	1.9913	1.14869	55.987	127.061	0	3
7.583	10.8239	6.2438	95.4413	16.2526	0	3
10.4569	3.35996	1.9382	76.9191	85.57	0	3
7.14694	3.77503	2.17764	80.7503	40.3241	0	3
10.2791	1.91677	1.1057	68.8271	168.718	0	3
8.31136	5.18409	2.99046	93.8341	39.2343	0	3
10.2642	1.77324	1.0229	60.9433	149.077	0	3
7.31623	1.79139	1.03337	81.5911	63.6236	0	3
10.7125	3.20694	1.84993	68.9072	93.8708	0	3
7.55926	3.25556	1.87798	83.4574	111.522	0	3
8.73327	7.10863	4.10064	71.2764	62.2525	0	3
9.59025	1.26689	0.730809	56.7652	142.486	0	3
10.4569	3.62227	2.08952	74.6795	98.8237	0	3
9.5449	6.35918	3.66832	68.7357	72.1289	0	3
9.855	3.306	1.90708	64.484	91.2778	0	3
7.16828	2.07737	1.19834	104.828	78.8954	0	3
8.5631	6.00106	3.46173	55.4698	64.7341	0	3
9.62526	3.26386	1.88277	65.1006	88.9482	0	3
9.17684	17.122	9.87691	56.2441	33.949	0	3
9.7237	1.90967	1.1016	51.7705	198.709	0	3
9.82922	1.67181	0.96439	53.8261	180.224	0	3
10.7378	2.18787	1.26208	65.3963	118.5	0	3
8.47216	2.82135	1.6275	108.208	68.2012	0	3
11.6264	2.67547	1.54336	70.0679	103.655	0	3
9.78726	1.59613	0.920735	46.2366	182.984	0	3
7.08054	3.25168	1.87574	80.7534	68.7078	0	3
13.2176	2.83718	1.63664	72.1037	127.817	0	3
8.64235	11.72	6.76073	71.7071	55.4794	0	3
7.04027	24.2682	13.9992	54.1937	30.8071	0	3
6.6498	59.3333	34.2267	56.7052	7.75319	0	3
9.47143	1.69286	0.976531	49.8821	174.341	0	3
6.10526	39.9723	23.0582	55.6994	14.624	0	3
8.67861	1.50214	0.866514	61.4289	162.698	0	3
9.74667	6.22333	3.58995	87.8917	32.894	0	3
7.11785	2.4899	1.43631	64.032	86.5105	0	3
5.97059	8.21912	4.74123	52.7456	41.3418	0	3
6.36991	0.970219	0.559675	57.7194	137.908	0	3
7.14413	10.9893	6.33923	81.8986	10.0688	0	3
9.46228	1.79123	1.03328	57.4061	156.453	0	3
6.8482	3.14241	1.81271	77.5086	34.2861	0	3
7.15799	2.70226	1.55881	66.5165	103.244	0	3
9.48956	2.39875	1.38373	66.047	116.669	0	3
7.5682	1.30029	0.75008	91.5172	152.649	0	3
6.77408	13.5797	7.83349	76.1839	11.3021	0	3
9.52729	4.34192	2.50465	61.9815	73.6695	0	3
10.127	1.94831	1.12389	60.5629	158.106	0	3
6.9717	1.89465	1.09294	81.077	57.774	0	3
11.6714	2.1648	1.24877	69.4914	122.223	0	3
11.4726	1.63425	0.942721	64.5644	172.924	0	3
11.4796	2.16686	1.24996	67.7795	142.025	0	3
10.035	2.02257	1.16673	67.0271	128.232	0	3
8.11669	15.5387	8.96354	51.4885	28.3854	0	3
9.31208	1.45286	0.838085	59.838	157.514	0	3
9.55789	1.66794	0.962159	57.8124	178.188	0	3
10.002	1.79919	1.03787	62.2079	143.648	0	3
10.1514	1.45307	0.838207	54.6195	172.956	0	3
8.82961	12.4277	7.16898	52.0024	43.2883	0	3
9.25266	1.71442	0.988972	55.6128	155.198	0	3
7.19784	15.3199	8.83736	59.0093	14.6831	0	3
7.99874	1.04654	0.603701	46.7044	159.54	0	3
10.172	1.60966	0.928537	59.1087	152.489	0	3
9.83135	1.4573	0.840647	58.2627	174.119	0	3
9.08561	1.1799	0.68063	54.4938	150.436	0	3
6.77508	3.31643	1.91309	103.602	61.5485	0	3
8.40173	17.2119	9.92877	58.1888	43.1425	0	3
7.22749	1.54028	0.888519	73.5134	75.023	0	3
9.62199	1.41123	0.814071	54.8213	166.797	0	3
8.7889	3.60283	2.07831	57.2546	83.6075	0	3
9.56429	3.29429	1.90032	56.9029	101.017	0	3
8.22518	4.6921	2.70665	56.5395	81.0442	0	3
7.73537	16.6423	9.60017	79.6981	50.4668	0	3
8.3798	2.2854	1.31834	55.0066	118.017	0	3
5.73029	27.3665	15.7865	50.74	4.95047	0	3
8.29303	6.57723	3.7941	56.7158	68.0892	0	3
5.25726	24.5793	14.1786	56.6432	22.9015	0	3
8.17373	1.50982	0.870948	48.3433	154.788	0	3
8.77366	2.13463	1.23137	56.321	106.833	0	3
6.76326	9.97917	5.75652	43.9659	49.0037	0	3
10.3202	2.12678	1.22684	70.2404	143.243	0	3
9.1993	3.19669	1.84402	65.1584	78.8162	0	3
9.60641	9.3275	5.3806	70.0564	48.1037	0	3
8.16846	1.77462	1.02369	87.5785	126.772	0	3
9.21143	2.65156	1.52956	68.5275	88.8155	0	3
10.2895	2.60854	1.50475	66.4969	103.923	0	3
9.12535	2.93222	1.69146	74.3946	91.3006	0	3
9.76628	1.64568	0.949315	59.0117	184.57	0	3
9.11165	1.40413	0.809975	50.1735	183.184	0	3
10.548	1.65348	0.953818	59.9096	140.923	0	3
8.06667	3.60702	2.08072	48.9766	104.845	0	3
8.87776	1.56567	0.903162	60.987	168.062	0	3
10.7063	4.65875	2.68742	73.3359	118.798	0	3
10.9102	18.9847	10.9514	71.0942	41.3963	0	3
9.21938	14.6347	8.44211	85.5635	25.5453	0	3
8.4809	2.14719	1.23862	51.6213	132.863	0	3
7.97235	1.8871	1.08858	53.6889	168.579	0	3
8.33621	27.6095	15.9266	56.3086	28.9978	0	3
9.25926	1.71735	0.990659	52.922	201.345	0	3
9.52372	1.71252	0.987876	54.4962	188.668	0	3
9.14563	9.93689	5.73213	68.2557	66.4628	0	3
8.91981	1.51509	0.873988	60.3651	126.984	0	3
8.03963	2.63594	1.52055	60.3512	105.732	0	3
8.66971	1.99608	1.15145	50.2337	188.462	0	3
6.27368	1.79789	1.03712	90.0968	80.7255	0	3
10.8289	20.3223	11.723	69.4252	46.4508	0	3
8.81272	1.93291	1.11501	88.5521	141.708	0	3
7.64909	1.79407	1.03492	60.285	107.69	0	3
8.50052	1.38733	0.800287	51.9138	138.286	0	3
9.60616	1.84268	1.06296	60.5534	126.854	0	3
9.21376	4.15126	2.39467	63.2574	114.608	0	3
5.91558	30.5896	17.6457	49.5338	22.0188	0	3
7.57665	1.97563	1.13965	92.4873	100.318	0	3
6.43515	2.98635	1.72269	76.1894	59.3531	0	3
6.3221	1.78791	1.03136	71.0565	175.81	0	3
7.52113	2.32596	1.34174	88.6298	130.819	0	3
6.68543	45.7045	26.3648	56.0905	8.08171	0	3
6.94924	34.6277	19.9751	50.7792	16.2383	0	3
9.57262	6.06479	3.49849	55.7565	66.7388	0	3
9.19286	1.66071	0.957989	50.3476	168.812	0	3
8.63817	6.19987	3.57642	76.8785	83.175	0	3
6.71747	1.11152	0.641187	92.3792	149.557	0	3
8.07646	4.89034	2.82101	52.5976	95.8034	0	3
6.47473	1.29061	0.744495	71.0361	110.101	0	3
6.26667	49.5387	28.5766	51.5982	7.48	0	3
7.83827	1.61304	0.930488	46.5301	150.034	0	3
7.47265	4.54283	2.62055	55.4799	91.0673	0	3
6.21949	23.2723	13.4247	58.2368	29.1569	0	3
6.07463	28.9328	16.69	56.4863	20.3688	0	3
6.91019	2.6699	1.54014	102.182	51.358	0	3
8.84907	2.55163	1.47192	60.6399	99.062	0	3
9.86749	11.8789	6.85241	67.5958	44.7781	0	3
9.20164	16.5146	9.52651	63.687	38.8151	0	3
10.3782	1.82599	1.05333	60.4513	166.328	0	3
9.0099	3.56848	2.05849	56.9538	84.1114	0	3
8.94833	5.21818	3.01013	67.422	70.1464	0	3
9.39442	8.35814	4.82142	65.9051	57.9019	0	3
6.92398	1.07923	0.622557	74.3737	195.535	0	3
7.76018	3.16199	1.82401	62.4027	80.787	0	3
7.20983	14.121	8.14574	88.2344	11.9	0	3
9.66736	1.84728	1.06561	60.0868	130.923	0	3
9.16878	1.44304	0.832422	58.8745	140.434	0	3
7.35041	6.00349	3.46314	55.0733	73.4479	0	3
9.04357	1.78116	1.02747	58.5643	162.377	0	3
8.26176	2.12777	1.22741	56.7516	186.605	0	3
7.82172	2.28039	1.31545	58.7147	117.134	0	3
9.23747	2.01961	1.16502	59.1231	149.665	0	3
8.35302	1.48688	0.85771	45.227	189.149	0	3
8.49897	1.36289	0.786186	50.5649	171.689	0	3
7.49108	6.33294	3.65318	71.7574	86.3366	0	3
9.43973	2.0034	1.15567	56.5433	128.376	0	3
7.84507	1.67093	0.963885	48.2983	155.571	0	3
8.12425	1.93429	1.1158	50.1266	166.409	0	3
7.12794	10.1985	5.88306	61.325	70.1225	0	3
8.68593	2.20477	1.27183	46.309	178.771	0	3
8.03036	6.73814	3.88692	71.2296	54.8444	0	3
9.04777	3.8013	2.1928	64.2454	109.426	0	3
8.36009	2.4437	1.40966	45.233	152.485	0	3
7.7189	8.0076	4.61921	61.566	94.6361	0	3
6.32206	5.49597	3.17037	53.8567	56.6832	0	3
7.24492	2.29091	1.32152	43.7422	115.979	0	3
9.11963	3.80061	2.1924	55.7802	103.24	0	3
7.6224	10.4258	6.01415	50.9583	46.3524	0	3
7.55412	7.38483	4.25997	56.9019	77.6102	0	3
7.9873	2.72168	1.57001	55.1406	121.857	0	3
7.88844	8.12362	4.68614	55.3126	63.2437	0	3
5.72439	9.37561	5.40836	143.329	31.6401	0	3
9.78782	3.33492	1.92376	52.3473	99.718	0	3
7.44413	3.06345	1.76716	51.0123	125.292	0	3
5.33663	1.18152	0.681563	61.3828	142.591	0	3
5.6129	47.8875	27.6241	47.5054	5.69944	0	3
6.17825	10.2699	5.92422	46.3484	58.6192	0	3
7.36273	2.17639	1.25546	44.1536	153.192	0	3
6.37229	11.7143	6.75743	41.1677	40.281	0	3
6.59285	4.06554	2.34522	56.6216	99.1985	0	3
8.96981	2.60252	1.50127	66.0314	185.902	0	3
8.17961	3.00607	1.73406	65.1675	110.24	0	3
6.73826	6.32383	3.64792	74.9027	35.288	0	3
7.8309	6.27697	3.62089	75.9324	59.6746	0	3
8.2824	3.9913	2.30239	67.5648	78.8192	0	3
9.64442	2.34522	1.35285	70.1864	113.55	0	3
8.58351	2.17345	1.25376	63.2709	152.636	0	3
8.77545	1.84531	1.06447	59.9251	139.281	0	3
8.31696	2.04143	1.1776	53.9287	152.625	0	3
6.48757	29.6004	17.0751	65.9637	23.1225	0	3
9.23884	13.7238	7.9166	74.8926	46.6594	0	3
7.96328	1.29158	0.745051	45.0335	186.008	0	3
8.14674	1.29755	0.748499	105.51	123.686	0	3
8.05931	9.93594	5.73159	55.4947	62.9221	0	3
9.63983	1.82559	1.0531	65.4923	137.639	0	3
9.08395	5.11158	2.94864	67.085	115.582	0	3
9.30677	6.19651	3.57448	70.5524	102.903	0	3
6.01783	35.307	20.367	53.0586	14.2962	0	3
8.3035	2.10019	1.21151	53.8599	174.412	0	3
7.77846	1.76622	1.01885	49.3378	199.649	0	3
7.75597	1.91323	1.10366	65.423	117.686	0	3
8.70954	2.88589	1.66474	67.3237	125.443	0	3
6.37935	51.5948	29.7627	57.5196	6.12944	0	3
7.04507	1.30451	0.75251	48.9464	176.759	0	3
8.10628	2.19082	1.26378	53.8043	164.072	0	3
7.47075	28.8693	16.6534	59.862	37.2762	0	3
8.67116	21.8575	12.6086	59.9708	49.8074	0	3
7.09292	65.3197	37.6799	60.865	4.6245	0	3
8.39384	1.79936	1.03797	55.3535	145.712	0	3
7.19937	9.7702	5.63598	65.5929	95.9752	0	3
7.55748	6.83406	3.94225	74.346	119.937	0	3
6.49802	12.0435	6.94733	63.667	75.9076	0	3
9.95722	7.33244	4.22975	62.713	105.477	0	3
7.12523	1.7441	1.00609	48.2142	171.367	0	3
6.20842	67.7144	39.0613	60.977	4.95047	0	3
6.0358	50.6981	29.2454	52.006	10.5564	0	3
7.70856	1.60027	0.92312	43.0548	173.741	0	3
7.47844	1.77469	1.02373	54.0417	145.364	0	3
7.44513	2.04718	1.18092	57.3897	134.362	0	3
7.45354	1.94591	1.1225	43.6227	178.596	0	3
8.96246	7.92388	4.57092	71.4505	84.7473	0	3
7.76149	2.26477	1.30644	48.9114	144.18	0	3
5.6593	1.19419	0.688871	76.2965	167.715	0	3
5.89687	8.88297	5.12417	53.336	84.1945	0	3
8.03832	12.1078	6.98445	53.9947	50.0678	0	3
6.83073	4.22689	2.4383	40.533	161.441	0	3
7.01657	4.57633	2.63987	47.5609	123.249	0	3
7.02368	4.82347	2.78243	47.7492	143.219	0	3
8.20036	3.43113	1.97926	137.424	140.553	0	3
7.62349	5.7772	3.3326	58.6839	56.0948	0	3
9.02146	3.93133	2.2678	69.2389	178.643	0	3
8.32727	2.85212	1.64526	62.4303	158.668	0	3
9.32798	2.27867	1.31446	73.6995	119.56	0	3
9.61019	2.67769	1.54463	59.1405	182.058	0	3
10.308	2.14432	1.23696	59.6284	178.568	0	3
9.24554	5.16634	2.98022	66.2604	94.1364	0	3
7.52312	22.7411	13.1183	59.3963	35.4204	0	3
6.95619	1.84536	1.0645	107.93	130.167	0	3
8.82877	2.4274	1.40025	60.5384	138.265	0	3
8.0818	26.6694	15.3843	74.6532	45.7701	0	3
5.36063	51.3467	29.6195	57.1202	13.6678	0	3
6.3902	50.076	28.8865	61.2753	2.47524	0	3
7.52466	2.25561	1.30115	51.719	148.939	0	3
8.51152	2.59908	1.49929	54.7896	145.07	0	3
7.52925	2.87347	1.65757	47.7388	165.022	0	3
8.14264	2.25409	1.30028	67.3091	137.122	0	3
8.94603	1.48479	0.856506	58.9696	151.201	0	3
7.21677	2.79272	1.61099	45.1234	202.001	0	3
6.49552	1.13901	0.657044	59.7018	172.51	0	3
5.37785	2.80456	1.61782	89.7557	80.8435	0	3
7.04634	2.02392	1.1675	45.0747	195.266	0	3
8.66279	2.32558	1.34152	60.436	140.361	0	3
7.68739	3.5395	2.04177	55.5563	126.771	0	3
6.568	2.188	1.26216	57.508	104.381	0	3
7.41913	2.44628	1.41115	57.1594	138.484	0	3
6.23596	36.6854	21.1621	53.015	15.9365	0	3
9.69597	6.01729	3.4711	64.2911	89.7355	0	3
5.53296	40.9303	23.6108	57.3578	14.1988	0	3
7.13917	2.80344	1.61718	52.2238	140.268	0	3
7.5819	2.93604	1.69366	53.4587	183.507	0	3
6.3613	18.9202	10.9142	51.9608	59.2703	0	3
7.39255	3.67343	2.11903	51.8816	134.841	0	3
8.28368	3.00792	1.73513	53.9192	128.169	0	3
8.20649	2.38643	1.37662	44.4366	167.819	0	3
7.72742	2.41639	1.3939	54.4732	153.332	0	3
7.27785	2.77472	1.60061	55.0601	124.387	0	3
7.86228	4.70659	2.71501	51.2051	104.798	0	3
7.41289	2.10453	1.21401	49.5627	157.843	0	3
6.35294	25.7041	14.8275	45.697	28.4668	0	3
8.34174	8.58683	4.95335	53.1779	94.2757	0	3
6.81307	4.4461	2.56475	50.9794	107.776	0	3
4.98184	34.2983	19.7851	45.332	19.0066	0	3
6.59201	21.4566	12.3773	58.9028	32.8747	0	3
5.50896	12.4866	7.20292	53.894	46.18	0	3
6.38671	10.6465	6.14147	60.013	78.9283	0	3
7.76802	3.13964	1.81111	56.8007	108.129	0	3
6.70588	2.18968	1.26312	50.9232	141.558	0	3
5.8023	2.08445	1.20242	59.9175	156.803	0	3
6.74638	7.54203	4.35065	51.7493	116.62	0	3
5.90965	38.7626	22.3604	53.2312	18.1096	0	3
7.15666	5.78851	3.33912	71.6292	31.1411	0	3
6.75869	2.16409	1.24836	59.8938	87.0427	0	3
6.33333	4.45	2.567	53.1854	73.284	0	3
6.21548	3.29707	1.90193	55.1862	147.009	0	3
7.20884	16.9985	9.80563	61.0351	40.9428	0	3
6.58716	25.5229	14.723	67.8789	27.6573	0	3
6.46538	5.79388	3.34222	54.8905	59.6543	0	3
11.6352	3.90558	2.25295	96.3155	162.894	0	3
6.84778	2.2948	1.32376	48.2216	195.359	0	3
6.03562	2.1589	1.24537	42.4932	156.113	0	3
7.73932	2.19872	1.26834	55.4038	168.812	0	3
8.48868	3.54151	2.04293	55.7415	188.643	0	3
5.88264	3.05134	1.76018	49.7604	131.132	0	3
7.29289	2.55806	1.47563	60.1213	184.121	0	3
5.66791	2.51866	1.4529	48.4403	112.913	0	3
7.38833	1.72435	0.994695	84.3581	152.469	0	3
5.63519	10.3593	5.97578	56.5204	58.7531	0	3
6.68447	2.02003	1.16526	43.3923	191.244	0	3
6.98775	10.83	6.24733	62.9403	78.9532	0	3
6.378	23.496	13.5538	63.938	49.4697	0	3
6.02186	1.59745	0.921495	54.2568	146.028	0	3
7.18182	14.2338	8.2108	72.7013	78.1512	0	3
7.05543	2.57206	1.4837	43.9202	177.508	0	3
6.82527	3.69624	2.13219	54.3817	108.672	0	3
6.23846	2.75641	1.59005	34.0051	174.202	0	3
5.11067	1.16996	0.674896	44.9091	135.813	0	3
6.61345	2.64076	1.52333	42.9433	158.369	0	3
6.4216	4.05052	2.33656	46.6725	117.851	0	3
5.99774	3.78054	2.18082	42.3824	130.684	0	3
6.01645	1.9375	1.11765	47.0789	148.827	0	3
5.65	12	6.92224	49.805	74.7977	0	3
5.91922	6.12256	3.53182	40.5766	96.6468	0	3
65.9685	6.18591	2.87464	38.9295	69.6295	1	4
78.5592	38.6041	17.9396	39.8027	43.4416	1	4
53.7189	39.1494	18.1931	38.3757	34.3417	1	4
75.3309	30.6673	14.2513	32.145	34.2051	1	4
71.1809	16.6601	7.74208	35.6107	60.9748	1	4
81.1283	41.2659	19.1766	36.4486	36.0224	1	4
163.206	41.931	19.4857	32.1443	28.4668	1	4
79.8385	36.0267	16.7419	36.4023	36.9866	1	4
59.3975	45.7396	21.2556	33.1801	29.582	1	4
52.2093	37.673	17.5069	25.8023	38.42	1	4
159.305	15.1222	7.02741	37.1824	51.68	1	4
116.114	45.6345	21.2067	35.7706	37.9599	1	4
63.1969	15.0566	6.99693	30.9811	62.9	1	4
62.9719	24.3328	11.3077	35.7604	44.4556	1	4
159.921	71.0593	33.0219	33.8549	34.2861	1	4
48.9524	62.9034	29.2317	35.1429	26.6591	1	4
70.178	78.8814	36.6568	32.143	24.539	1	4
54.2735	22.712	10.5544	26.2816	46.5589	1	4
56.4957	34.6821	16.1171	35.2728	40.5756	1	4
74.148	71.6433	33.2932	31.8006	30.26	1	4
59.3256	21.0501	9.78215	33.1464	63.5436	1	4
53.0288	31.2974	14.5442	31.959	55.349	1	4
44.5708	19.0652	8.85974	29.8	53.0324	1	4
146.572	35.4853	16.4903	34.4404	47.4662	1	4
127.418	44.906	20.8682	35.6348	41.7923	1	4
6.58333	2.98627	1.38775	35.0912	211.327	0	4
6.82602	3.33434	1.5495	38.9334	202.941	0	4
6.65596	3.19266	1.48366	33.0872	194.297	0	4
6.88453	1.6582	0.770579	30.7344	201.872	0	4
6.06651	2.052	0.953579	33.451	201.183	0	4
6.0128	2.81901	1.31002	30.7459	193.018	0	4
5.93732	2.16524	1.00621	37.8718	195.699	0	4
6.66853	1.97292	0.916833	29.0514	194.979	0	4
5.76739	2.53913	1.17995	31.1261	186.479	0	4
5.96451	2.02505	0.941058	33.3549	189.304	0	4
6.80137	1.85616	0.862575	33.6301	179.482	0	4
7.13571	2.55306	1.18643	35.5918	186.599	0	4
5.69792	1.45486	0.676086	57.6076	183.781	0	4
6.75602	3	1.39412	29.6687	171.221	0	4
6.16531	2.07347	0.963558	36.4061	177.024	0	4
6.93053	4.76	2.21201	36.2821	180.2	0	4
7.15803	5.70544	2.65136	37.818	180.169	0	4
6.77926	2.52296	1.17244	36.8222	178.112	0	4
5.89505	2.14543	0.996998	27.907	166.71	0	4
6.57594	3.62722	1.6856	36.0986	170.768	0	4
5.84961	1.70694	0.793229	26.5257	169.052	0	4
7.05328	1.78882	0.831281	37.6439	165.566	0	4
6.30469	2.46484	1.14543	35.748	166.629	0	4
7.35208	3.18125	1.47835	32.7208	169.867	0	4
6.05904	1.57073	0.729929	52.4465	119.736	0	4
6.79179	2.53666	1.17881	35.1188	163.879	0	4
6.56044	1.9168	0.890752	33.7614	160.89	0	4
7.5597	2.4005	1.11553	33.5373	162.861	0	4
6.2	2.3982	1.11446	34.4757	153.056	0	4
9.42636	3.18088	1.47818	37.7881	156.887	0	4
6.84691	3.02769	1.40699	34.614	146.063	0	4
6.27515	2.16838	1.00766	30.9384	143.606	0	4
6.615	2.05	0.952652	27.1575	147.23	0	4
7.57895	2.74687	1.27649	33.4286	150.287	0	4
6.26653	2.25331	1.04713	26.8228	136.161	0	4
8.25265	1.8254	0.848277	38.1852	125.942	0	4
6.27726	1.56377	0.726697	60.6617	94.6764	0	4
6.76993	5.38952	2.50455	33.1344	138.213	0	4
7.36238	2.82574	1.31315	34.0356	126.288	0	4
7.59375	1.7125	0.795813	32.5344	137.76	0	4
7.9673	2.12453	0.987286	35.883	135.404	0	4
6.44017	2.23291	1.03765	26.797	126.328	0	4
5.00969	1.17829	0.547563	44.4535	129.152	0	4
6.74298	1.99784	0.928413	32.933	133.655	0	4
6.35449	1.96749	0.91431	28.6997	127.905	0	4
6.57907	1.36047	0.632219	52.1605	104.252	0	4
7.3777	2.36439	1.09875	36.8852	128.194	0	4
5.12039	1.18459	0.550489	41.6437	112.954	0	4
6.68998	2.32591	1.08087	33.9968	119.777	0	4
5.08991	1.16667	0.54216	41.4627	114.022	0	4
6.01957	1.86739	0.867792	29.3326	119.895	0	4
7.18489	2.52286	1.1724	34.3817	86.4409	0	4
6.73961	2.19037	1.01788	31.1357	110.881	0	4
7.56109	2.20814	1.02614	36.0241	114.582	0	4
8.71532	2.99099	1.38994	34.1243	73.6765	0	4
6.92807	2.69649	1.25308	33.8018	100.688	0	4
8.14869	2.19534	1.02019	29.1399	105.356	0	4
6.52522	2.31478	1.0757	28.5009	100.333	0	4
5.84764	1.09013	0.506592	54.0494	102.44	0	4
7.56275	1.88771	0.877237	42.7543	94.6428	0	4
10.2648	3.70345	1.72102	41.491	76.2578	0	4
7.00537	1.63327	0.758996	30.2576	103.146	0	4
7.91136	2.41823	1.12377	37.1985	99.8078	0	4
5.37802	1.25495	0.583183	41.4681	91.8963	0	4
6.3928	2.59348	1.20521	29.6535	87.9523	0	4
9.20867	2.79454	1.29865	38.4077	97.58	0	4
7.74835	1.81028	0.84125	33.6746	93.5167	0	4
9.83152	5.12228	2.38037	41.9497	66.3871	0	4
7.62975	3.32911	1.54707	31.2911	82.2779	0	4
9.10176	3.27006	1.51962	38.6341	88.5888	0	4
8.4606	6.96848	3.23831	31.9527	88.1394	0	4
7.85507	4.21377	1.95817	49.6667	57.6047	0	4
7.5101	2.6633	1.23766	67.7778	66.5332	0	4
6.6472	2.6764	1.24374	47.2117	79.2667	0	4
10.8898	16.0055	7.43789	38.3664	37.7339	0	4
8.07773	8.57773	3.98614	39.2416	69.2549	0	4
9.00693	3.5853	1.66612	36.3911	80.92	0	4
8.0217	3.3906	1.57564	38.5497	79.9723	0	4
13.1382	25.4931	11.8468	37.9724	22.3678	0	4
5.88698	3.05651	1.42039	59.3022	57.2948	0	4
8.72523	6.4782	3.01047	38.8137	69.3542	0	4
8.26278	9.28693	4.31571	37.3594	60.5925	0	4
9.23834	7.15026	3.32278	37.4266	64.3894	0	4
9.40901	27.4653	12.7633	35.2702	57.734	0	4
7.95059	9.9922	4.64346	36.8817	56.1443	0	4
10.4485	24.0285	11.1662	35.397	27.4412	0	4
8.99051	7.64363	3.55206	40.2453	60.0117	0	4
8.26667	8.29697	3.85567	36.4242	54.3362	0	4
10.5564	11.1328	5.17352	38.5226	55.76	0	4
8.44689	8.61905	4.00534	44.1026	54.4	0	4
8.36014	15.8135	7.34867	30.9959	43.9022	0	4
9.67045	12.5994	5.85506	36.3679	44.831	0	4
14.3432	49.4917	22.9992	47.8312	4.26019	0	4
8.92478	17.9823	8.35652	29.1748	38.3477	0	4
9.38435	15.92	7.39815	29.2974	44.54	0	4
5.94477	7.01744	3.26106	56.3881	32.3429	0	4
9.91928	23.7825	11.0519	30.6188	27.5924	0	4
9.18673	27.3627	12.7157	36.892	31.8404	0	4
8.55346	25.5094	11.8544	27.4119	32.5567	0	4
9.29637	35.7379	16.6077	35.9274	22.2044	0	4
8.04826	2.74263	1.27452	94.2601	29.58	0	4
8.00605	6.89718	3.20517	60.0141	26.5287	0	4
9.73102	51.1535	23.7714	40.7492	14.8125	0	4
8.4279	32.8903	15.2844	30.6928	23.8873	0	4
10.818	37.3596	17.3613	37.6228	18.7371	0	4
11.273	9.10714	4.23216	63.6607	21.76	0	4
11.2926	62.6609	29.119	44.2702	8.52038	0	4
10.3455	45.4078	21.1014	30.7169	15.3942	0	4
12.3829	36.8536	17.1262	34.1194	13.2032	0	4
11.6762	58.3762	27.1279	42.4746	3.9796	0	4
6.84987	3.68633	1.71307	38.8472	207.107	0	4
7.65309	1.74579	0.811281	34.7388	158.747	0	4
6.67316	1.1526	0.535621	31.7284	173.503	0	4
7.14122	1.22901	0.57113	29.2405	163.024	0	4
6.19505	2.56037	1.18983	28.8514	190.126	0	4
5.71197	1.9288	0.89633	28.4369	188.898	0	4
7.54784	1.83951	0.854834	37.0818	163.554	0	4
6.16155	2.59546	1.20613	32.7517	181.468	0	4
6.49791	3.13598	1.45732	33.1255	172.882	0	4
6.85261	1.5597	0.724806	28.0112	153.828	0	4
5.7561	1.05987	0.492529	40.1962	129.615	0	4
5.18413	1.4012	0.651148	52.476	176.999	0	4
7.6621	1.73516	0.806343	33.5868	138.777	0	4
5.85055	1.42251	0.661052	31.8911	174.08	0	4
6.21446	2.11029	0.980671	31.5686	166.224	0	4
6.16837	2.96246	1.37668	30.4903	148.599	0	4
6.18941	1.70787	0.793659	29.4767	148.74	0	4
6.76772	2.42685	1.12778	34.7677	148.874	0	4
5.85192	1.51731	0.705105	37.5	151.939	0	4
6.85253	1.84147	0.855748	30.8636	147.7	0	4
6.87794	1.93041	0.897076	32.8565	146.654	0	4
6.32677	2.05709	0.955945	29.4941	139.301	0	4
6.28904	1.91362	0.889276	29.0316	140.067	0	4
8.51872	1.85132	0.860324	34.6167	115.166	0	4
7.30076	2.10382	0.977661	37.8275	128.12	0	4
6.28812	1.18968	0.552852	49.1861	88.1938	0	4
6.67275	2.98326	1.38634	33.3653	115.264	0	4
5.76211	2.33921	1.08705	33.3216	111.793	0	4
5.44253	1.66322	0.772911	42.6632	108.297	0	4
8.06294	1.8951	0.880671	35.0478	115.593	0	4
7.68916	1.71928	0.798962	36.0988	115.259	0	4
8.72699	10.2193	4.749	33.0291	58.3078	0	4
8.31114	2.29346	1.06579	35.518	106.42	0	4
6.69514	3.0749	1.42893	34.9028	100.032	0	4
9.10622	5.8	2.69531	43.2526	57.732	0	4
7.69337	4.01541	1.86599	32.4961	82.6592	0	4
5.56671	1.98094	0.920559	48.6963	73.787	0	4
8.925	13.4294	6.24076	31.7044	45.4533	0	4
7.35818	2.50729	1.16516	29.5916	81.4199	0	4
6.78703	4.00734	1.86225	30.5789	74.5779	0	4
11.2014	27.0785	12.5836	35.7295	30.9419	0	4
8.25367	3.26836	1.51883	36.3765	75.9122	0	4
7.69819	3.99352	1.85582	35.5402	72.6622	0	4
7.50975	4.37711	2.03408	35.3563	68.7111	0	4
6.49395	2.4092	1.11958	48.7482	62.1494	0	4
9.20906	14.3436	6.66557	30.9269	53.0542	0	4
7.59233	4.93525	2.29345	50.3741	52.3777	0	4
9.58739	9.93561	4.61716	46.5611	52.4934	0	4
8.52978	14.9067	6.92729	36.314	43.4309	0	4
9.07143	27.2464	12.6616	36.8964	25.2723	0	4
16.2008	52.1008	24.2117	59.5373	18.774	0	4
10.1185	34.6777	16.115	33.2474	15.98	0	4
11.0967	69.711	32.3953	36.5357	4.20557	0	4
7.38424	26.3039	12.2236	84.672	2.80371	0	4
5.9723	24.4958	11.3834	63.7867	1.02	0	4
5.1936	1.6096	0.747994	27.2064	208.121	0	4
6.1	2.148	0.998193	33.5507	207.722	0	4
6.067	4.08091	1.89643	41.598	185.752	0	4
6.05931	1.47117	0.683665	29.6409	194.939	0	4
6.05578	2.49203	1.15807	29.6873	183.238	0	4
6.23482	3.27935	1.52394	32.4318	187.433	0	4
8.02715	1.64699	0.765369	33.9894	142.6	0	4
5.17949	1.38248	0.642449	41.4316	178.601	0	4
7.21115	1.65034	0.766926	30.4054	159.047	0	4
5.80656	2.17541	1.01093	25.3475	164.476	0	4
7.7686	1.86226	0.865407	35.8981	150.834	0	4
6.44832	2.17852	1.01238	34.1114	162.465	0	4
5.55401	2.5679	1.19332	27.892	156.232	0	4
6.48699	1.8302	0.85051	28.6705	157.739	0	4
6.05315	2.78739	1.29532	29.8467	138.564	0	4
6.19716	1.57019	0.72968	27.571	147.477	0	4
7.65824	1.45608	0.676651	34.923	136.799	0	4
7.26055	1.99007	0.924804	35.1352	142.894	0	4
6.54058	1.9326	0.898095	28.4759	137.289	0	4
7.59843	2.38058	1.10627	35.1391	132.26	0	4
6.61862	3.18112	1.47829	32.8151	121.624	0	4
7.65476	2.11508	0.982895	36.2328	124.518	0	4
6.93869	3.09051	1.43619	30.1839	118.961	0	4
6.87911	2.3929	1.112	32.1656	100.024	0	4
6.35372	1.32254	0.614596	51.554	106.737	0	4
7.15194	2.24146	1.04163	34.1755	105.898	0	4
6.73895	3.10316	1.44206	29.5811	99.0865	0	4
8.2	3.19641	1.4854	33.7365	93.5	0	4
7.55673	5.55013	2.57919	32.6504	76.6819	0	4
7.4629	5.44052	2.52825	29.8139	66.6903	0	4
7.09359	5.42051	2.51896	31.4705	66.4611	0	4
10.8111	17.8606	8.29995	36.3853	41.3809	0	4
6.52434	2.55805	1.18875	38.1966	58.0554	0	4
8.1153	7.22737	3.35862	33.3233	52.757	0	4
6.12635	4.76173	2.21282	44.3309	46.6246	0	4
7.76655	12.7816	5.93974	32.5366	47.7455	0	4
8.04895	11.7342	5.45297	35.6077	50.4874	0	4
6.21529	7.97384	3.70551	34.1227	32.9397	0	4
6.5843	5.87529	2.73029	43.5173	30.0761	0	4
8.20452	44.7251	20.7841	31.49	14.0062	0	4
8.39407	17.875	8.30666	41.803	20.06	0	4
8.43586	46.8192	21.7573	29.3061	6.46	0	4
10.0357	49.6061	23.0524	42.4788	18.1	0	4
9.73059	56.9498	26.465	33.9787	8.944	0	4
9.64387	59.1676	27.4957	40.8614	4.6245	0	4
8.75037	18.4439	8.57105	50.3034	4.42	0	4
6.8	5.27283	2.45033	41.3543	199.786	0	4
6.50789	3.10473	1.4428	30.8364	195.79	0	4
5.90206	1.78356	0.828833	32.5212	200.462	0	4
5.90544	3.44425	1.60057	35.9384	188.04	0	4
5.94238	2.60864	1.21226	29.4538	193.259	0	4
6.53893	2.27616	1.05775	30.6448	186.712	0	4
6.52217	8.90272	4.13717	36.5866	183.376	0	4
5.61955	2.36126	1.0973	24.4258	172.192	0	4
6.38443	2.5	1.16177	32.0472	171.712	0	4
4.71034	1.24368	0.577947	34.1241	159.011	0	4
5.2724	1.50896	0.701226	33.9785	168.328	0	4
7.73261	1.72717	0.802632	33.8609	134.001	0	4
6.97604	2.54633	1.1833	32.9856	158.463	0	4
5.82909	1.36182	0.632848	37.2873	154.36	0	4
7.02421	1.88502	0.875986	31.77	150.508	0	4
4.76355	1.34483	0.624952	50.7389	133.099	0	4
4.83747	1.3168	0.61193	47.6832	132.586	0	4
5.95625	2.6875	1.2489	51.2737	91.293	0	4
6.20038	1.87902	0.873195	33.3629	112.11	0	4
6.7658	2.44253	1.13506	29.875	122.672	0	4
6.30374	3.35922	1.56106	29.6394	105.427	0	4
6.83952	2.24431	1.04295	32.5641	112.153	0	4
6.86355	1.62657	0.755881	40.7199	92.1927	0	4
6.61444	3.05223	1.4184	27.9278	87.8135	0	4
6.81282	2.66282	1.23743	27.7013	89.104	0	4
7.35176	1.77889	0.826667	50.358	84.178	0	4
7.09355	3.01774	1.40237	26.5258	79.824	0	4
7.31604	4.73231	2.19914	29.4929	67.4169	0	4
7.4475	7.325	3.40399	29.1375	58.1559	0	4
8.21583	5.76499	2.67904	33.7146	64.4899	0	4
11.1721	3.85426	1.79111	57.9752	52.3434	0	4
9.2014	16.8168	7.8149	31.8476	41.3768	0	4
6.40509	6.84954	3.18304	43.338	35.9726	0	4
11.2092	8.95668	4.16224	59.0767	28.0041	0	4
9.25879	5.19347	2.41345	55.4724	38.8806	0	4
9.70545	6.89273	3.20311	53.4673	37.06	0	4
8.37097	23.2581	10.8082	29.4122	25.8243	0	4
8.02767	32.2925	15.0066	66.8854	1.02	0	4
6.78351	3.45876	1.60732	32.2397	201.307	0	4
6.36205	2.4253	1.12706	30.7631	196.717	0	4
6.55911	2.81404	1.30771	31.1392	192.864	0	4
6.95242	3.36384	1.5632	33.9766	187.031	0	4
7.44053	1.60793	0.747218	32.7015	163.337	0	4
6.79921	2.63144	1.22285	34.531	179.81	0	4
6.76495	2.69819	1.25387	30.7928	175.227	0	4
6.07876	2.25457	1.04772	38.9198	173.594	0	4
6.4137	2.09041	0.971431	31.0849	161.366	0	4
6.26502	1.66667	0.774514	31.4641	157.217	0	4
5.21661	1.18078	0.548719	35.2899	144.821	0	4
6.54582	1.66932	0.775748	28.8898	152.493	0	4
6.02674	2.72727	1.26739	26.7059	142.758	0	4
5.33833	1.59315	0.740349	35.4454	129.204	0	4
6.73243	1.65228	0.767829	31.9531	142.46	0	4
6.40115	2.44126	1.13447	32.7923	125.738	0	4
7.87415	2.28552	1.0621	37.046	126.82	0	4
5.56907	1.43346	0.666141	50.0241	120.032	0	4
6.25287	1.15674	0.537546	44.5496	101.938	0	4
7.09464	3.2571	1.5136	26.9653	94.7253	0	4
8.34343	3.75697	1.7459	30.8135	83.98	0	4
7.31486	3.01763	1.40232	51.6448	62.3833	0	4
9.47345	11.9071	5.53332	34.9204	51.6095	0	4
8.00772	7.35135	3.41623	30.7799	56.7474	0	4
7.53881	2.31507	1.07583	41.2283	61.54	0	4
16.7721	7.74264	3.59807	57.1721	58.1887	0	4
8.44072	14.7198	6.84039	35.4096	51.1912	0	4
9.4623	32.9317	15.3036	34.2589	7.17231	0	4
7.26016	24.3841	11.3315	31.2134	27.6134	0	4
9.24518	34.7373	16.1427	41.0963	2.885	0	4
9.11111	38.0797	17.696	33.1087	23.6587	0	4
9.48468	58.9912	27.4137	32.8698	12.8707	0	4
11.6045	72.908	33.881	40.6176	8.84	0	4
5.03141	0.766332	0.356121	40.3593	175.064	0	4
5.32966	2.23407	1.03819	44.4804	202.342	0	4
5.02532	1.27089	0.590591	37.7494	155.489	0	4
5.03855	1.9253	0.894703	35.8687	146.714	0	4
5.86896	1.55762	0.723839	37.3801	142.423	0	4
6.79484	2.67076	1.24112	32.2457	137.396	0	4
6.1749	3.09886	1.44007	24.9125	114.253	0	4
6.02807	3.02139	1.40406	39.9853	126.286	0	4
6.31206	1.34988	0.627301	43.1584	115.76	0	4
5.78141	2.30981	1.07339	24.5921	105.42	0	4
6.34705	2.37209	1.10233	26.2755	96.1407	0	4
8.22727	2.46061	1.14346	29.25	83.4414	0	4
7.37599	3.17018	1.47321	31.9921	94.1475	0	4
5.70968	1.61982	0.752742	44.0081	81.6637	0	4
7.64757	5.9566	2.76808	27.9549	72.4998	0	4
7.11748	5.20344	2.41808	42.2808	33.1914	0	4
7.84756	5.47154	2.54267	50.2195	36.4371	0	4
14.9065	4.02751	1.87162	55.3521	68.9228	0	4
8.27366	2.82353	1.31212	51.1816	62.06	0	4
7.72178	2.61155	1.21361	48.6745	64.9409	0	4
8.48202	9.32224	4.33212	31.8668	56.0948	0	4
12.0726	81.729	37.9802	41.1565	16.0378	0	4
6.22734	2.16876	1.00784	31.4616	212.553	0	4
4.91569	2.18824	1.01689	28.5098	206.062	0	4
6.31068	3.00416	1.39606	29.2816	177.039	0	4
6.38581	2.17935	1.01276	30.2374	178.765	0	4
6.00676	3.11622	1.44813	27.323	161.761	0	4
7.83788	2.83182	1.31597	33.0485	116.981	0	4
6.16452	3.80977	1.77043	30.5064	123.23	0	4
5.69611	1.36572	0.634663	40.7721	117.324	0	4
6.40654	3.19393	1.48424	40.6963	76.843	0	4
6.53024	1.64135	0.762749	48.5963	77.666	0	4
7.31224	17.436	8.10265	32.8453	51.3681	0	4
8.19758	13.6206	6.32961	31.5091	52.3434	0	4
9.56014	17.4093	8.09026	34.8582	37.7874	0	4
7.7617	25.0819	11.6558	28.1111	36.6901	0	4
8.32491	29.2942	13.6133	27.7816	25.6829	0	4
10.2353	52.0503	24.1882	35.7187	27.3716	0	4
7.06703	25.3641	11.7869	27.9094	17.122	0	4
10.5227	19.4159	9.02273	43.8977	13.26	0	4
6.01429	2.78571	1.29454	30.5036	164.795	0	4
6.37125	5.33333	2.47844	28.3633	156.899	0	4
5.34715	1.61917	0.752442	35.7565	148.097	0	4
5.43384	2.43886	1.13336	43.2278	129.73	0	4
6.76387	2.84311	1.32121	31.0887	114.156	0	4
6.67632	2.60647	1.21125	32.6542	122.917	0	4
6.88971	3.73676	1.73651	31.4721	113.094	0	4
6.90562	2.30924	1.07312	39.1305	67.5223	0	4
6.74573	1.36752	0.635498	40.1154	95.54	0	4
8.96394	5.78918	2.69028	37.7961	90.4387	0	4
7.08535	2.2845	1.06162	47.9659	75.9	0	4
8.05828	9.2296	4.28907	39.7378	73.7494	0	4
6.51712	2.25405	1.04748	50.5892	71.3579	0	4
9.69185	19.8569	9.22765	37.5288	46.5403	0	4
9.46627	9.27778	4.31146	34.0536	52.5077	0	4
8.98451	19.8732	9.23526	34.0817	52.3202	0	4
7.95874	24.1061	11.2023	37.6817	23.7222	0	4
7.88	26.0063	12.0853	42.3979	30.6717	0	4
10.5281	31.0275	14.4187	36.4395	39.78	0	4
7.43954	62.4376	29.0153	32.4386	2.72	0	4
5.70035	2.28223	1.06057	27.5801	179.824	0	4
6.4248	1.50407	0.698951	30.3272	166.328	0	4
5.67616	7.70641	3.58123	25.3754	188.124	0	4
5.76879	2.842	1.3207	29.6474	168.302	0	4
5.82185	1.15677	0.53756	46.5487	132.202	0	4
5.22409	1.53221	0.712032	35.4762	152.878	0	4
5.24288	1.67173	0.776865	33.63	138.408	0	4
7.09104	2.10526	0.978333	31.3912	147.333	0	4
8.08781	3.29391	1.53071	33.7491	99.4899	0	4
8.34206	6.61955	3.07616	35.2827	121.765	0	4
6.59283	2.47468	1.15001	34.3797	141.601	0	4
5.79449	2.33333	1.08432	25.9223	132.628	0	4
7.66929	2.45276	1.13982	30.5906	104.125	0	4
6.93103	2.20474	1.02456	33.2888	137.564	0	4
6.94676	3.37937	1.57042	34.1498	130.794	0	4
7.30024	2.0331	0.944797	26.5957	94.7893	0	4
6.36689	2.70917	1.25897	26.2438	116.996	0	4
7.56909	2.86727	1.33245	35.8273	126.628	0	4
6.33684	1.7	0.790004	46.1763	79.349	0	4
7.15836	3.2758	1.52229	33.548	114.475	0	4
7.43515	3.32594	1.54559	34.2099	119.157	0	4
6.84078	3.08939	1.43566	33.4581	120.02	0	4
6.11671	2.87268	1.33496	23.2069	108.441	0	4
8.36	3.20909	1.49129	31.8036	106.161	0	4
7.9569	2.3431	1.08886	32.5224	92.5962	0	4
7.38374	3.59058	1.66857	30.7475	100.504	0	4
6.65085	41.8085	19.4287	40.4305	56.8482	0	4
7.81866	3.69894	1.71893	33.0933	102.408	0	4
6.10616	4.38217	2.03643	28.0573	93.2846	0	4
8.26359	3.41351	1.58629	33.6787	100.011	0	4
8.11162	3.35991	1.56138	31.7563	91.8	0	4
8.13487	6.48191	3.0122	33.6266	83.6773	0	4
7.92749	13.8162	6.4205	37.8196	70.1398	0	4
8.32831	67.9654	31.5841	37.0181	7.00103	0	4
6.93738	49.6427	23.0694	28.5083	12.0208	0	4
7.62166	73.6028	34.2038	32.3124	5.37587	0	4
9.29936	93.3726	43.391	40.8105	7.48772	0	4
44.4584	28.9731	21.456	63.0187	22.962	1	5
83.448	9.13191	6.76264	75.7878	55.4982	1	5
166.96	20.6419	15.2863	54.7642	29.7379	1	5
156.567	50.1627	37.148	58.9897	19.0218	1	5
132.522	25.993	19.2491	68.2119	26.6266	1	5
184.899	15.9943	11.8446	47.7169	32.3125	1	5
56.5669	23.6893	17.5431	52.6083	38.1543	1	5
149.631	11.5055	8.52041	46.4812	50.054	1	5
163.456	10.659	7.89354	54.8175	50.1036	1	5
123.965	15.5955	11.5492	46.8163	39.912	1	5
125.801	6.80652	5.04057	49.675	69.912	1	5
63.6782	8.93909	6.61984	57.4573	62.5203	1	5
74.4554	21.3778	15.8313	53.0572	39.6038	1	5
158.118	22.3428	16.546	46.0099	25.318	1	5
213.957	24.1605	17.8921	52.1518	30.1528	1	5
152.312	12.2002	9.03485	54.406	83.5217	1	5
55.9768	16.275	12.0524	64.4327	61.8436	1	5
96.5349	17.2018	12.7388	58.7335	67.179	1	5
37.619	8.83178	6.54038	58.1162	55.9091	1	5
148.434	12.0422	8.91787	57.4778	60.0502	1	5
77.8252	33.1588	24.5558	49.5059	33.6737	1	5
40.7463	36.0501	26.6969	54.0193	24.428	1	5
54.821	9.336	6.91377	44.414	69.6278	1	5
97.5572	21.3825	15.8348	63.5482	53.553	1	5
143.63	33.1679	24.5625	62.9793	48.6782	1	5
54.4931	15.5789	11.537	78.2654	47.7963	1	5
25.2611	40.5986	30.0653	57.1931	21.9214	1	5
133.551	7.83204	5.80001	51.6594	57.5485	1	5
151.734	24.3206	18.0106	45.0799	43.6274	1	5
31.5373	10.0189	7.41949	58.4795	59.7569	1	5
142.108	7.70552	5.70632	46.0798	114.196	1	5
48.9893	12.8814	9.5393	46.9454	78.9503	1	5
124.426	18.3808	13.6119	58.0077	31.7222	1	5
142.767	4.18458	3.09889	57.3712	104.822	1	5
74.6779	9.4953	7.03175	57.647	75.1731	1	5
130.693	30.0232	22.2336	73.5874	51.8687	1	5
58.8256	8.25613	6.11408	58.0913	90.2282	1	5
[truncated: 5,085 more rows]
