# Supplementary material for: The pattern of nodal morphogen signaling is shaped by co-receptor expression
Source: eLife. 2021 May 26;10:e54894. doi: 10.7554/eLife.54894 (PMC8266389; doi:10.7554/eLife.54894)
Supplement: Figure 2—source data 2. — The quantified fluorescence intensities are organized in this table. Each row corresponds to an individual nucleus. The following characteristics were quantified: average GFP pixel intensity (‘GFP’), average pixel intensity for α-pSmad2 staining (‘pSmad2Raw’), α-pSmad2 staining intensity normalized to background (‘pSmad2 Normalized’), average DAPI pixel intensity (‘DAPI’), distance from the embryonic margin in μm (‘marginDist’), GFP staining status (‘GFP_Flag’, 0 denotes a cell host nucleus, one denotes a sensor cell nucleus), and embryo replicate number (‘Embryo Number’). We note that normalized α-pSmad2 staining was used to generate the figure panel. [file elife-54894-fig2-data2.xlsx]

## Sheet: Sheet1
GFP	pSmad2Raw	pSmad2Normalized	DAPI	marginDist	GFP_Flag	EmbryoNumber
120.273	52.7338	9.89262	40.0292	18.36	1	1
142.101	50.2338	9.42363	34.5481	12.92	1	1
48.2477	17.1045	3.20873	44.1542	140.613	1	1
56.7747	22.3402	4.19092	45.1629	130.521	1	1
102.376	78.9719	14.8148	53.1705	61.6976	1	1
58.5081	58.3342	10.9432	65.9461	75.7277	1	1
67.1294	67.3162	12.6282	62.8015	65.8179	1	1
81.7836	72.4317	13.5879	66.6022	68.3392	1	1
59.9621	42.4264	7.95901	55.6396	66.614	1	1
68.9024	58.3557	10.9473	42.0569	81.3311	1	1
57.2634	48.4788	9.09442	48.4106	69.8789	1	1
69.8998	54.0841	10.1459	52.5657	70.7412	1	1
32.1459	8.51964	1.59825	57.3749	60.9008	1	1
58.1375	72.5208	13.6046	54.4688	37.9249	1	1
26.9333	9.64906	1.81012	56.9182	62.7675	1	1
29.9262	27.323	5.12567	59.0345	77.0091	1	1
55.0668	86.0694	16.1462	65.4199	40.4729	1	1
18.7109	7.23131	1.35656	52.7137	68.5056	1	1
50.7834	94.8425	17.792	56.9437	40.7802	1	1
75.2855	28.5896	5.36329	55.0319	50.32	1	1
21.5591	25.7325	4.8273	55.789	63.6708	1	1
38.969	27.3173	5.12461	48.6841	88.2279	1	1
31.8306	10.2313	1.91935	62.0856	64.3894	1	1
61.8071	58.3105	10.9388	43.0752	81.7033	1	1
35.8102	6.51878	1.22289	53.1411	13.26	1	1
56.3043	21.9051	4.10931	24.8696	62.0349	1	1
75.4551	90.9438	17.0607	54.0899	44.6217	1	1
57.1563	49.2087	9.23135	45.3891	101.354	1	1
83.6729	30.19	5.66352	28.7788	39.3123	1	1
37.4735	67.0816	12.5842	55.8966	55.1199	1	1
54.7928	57.0805	10.708	57.4858	67.0585	1	1
46.5893	45.7497	8.58244	45.7275	80.5276	1	1
49.4867	75.6162	14.1853	50.7655	57.7169	1	1
53.0229	8.71101	1.63415	58.3372	57.12	1	1
60.8382	41.2141	7.73158	47.3824	77.2721	1	1
66.6904	53.314	10.0015	41.744	65.8451	1	1
48.6345	77.0388	14.4521	50.3414	54.2606	1	1
58.7208	59.2176	11.109	50.4654	86.1248	1	1
56.1615	48.3385	9.06809	49.029	60.9397	1	1
18.322	6.42408	1.20513	50.8757	28.3202	1	1
49.1389	71.8208	13.4733	51.3556	64.5463	1	1
64.6808	47.1736	8.84955	49.5475	102.34	1	1
39.95	68.5818	12.8656	56.297	52.5759	1	1
67.5406	46.7625	8.77244	53.3875	73.295	1	1
65.4482	93.2205	17.4878	61.0426	34.3316	1	1
43.3184	31.9154	5.98719	60.2139	83.98	1	1
56.0999	41.2764	7.74328	59.64	89.76	1	1
43.0216	54.336	10.1932	51.4777	57.124	1	1
68.0719	32.5784	6.11157	22.1699	38.8032	1	1
60.5769	49.6322	9.31079	50.7861	47.6983	1	1
31.6871	11.0612	2.07503	59.1329	88.0679	1	1
70.1093	41.0828	7.70695	27.3841	51	1	1
56.9941	46.2328	8.67307	49.2914	69.02	1	1
62.5367	46.957	8.80892	23.8582	29.4782	1	1
54.7175	43.839	8.224	27.5254	45.22	1	1
8.90229	6.12682	1.14936	69.1518	93.8406	0	1
8.09119	7.08333	1.3288	67.8538	43.9074	0	1
7.77064	4.58504	0.860133	66.374	175.796	0	1
8.04135	6.87782	1.29025	71.3064	32.7531	0	1
5.86975	2.13445	0.400414	76.105	192.47	0	1
6.25737	3.66488	0.687515	72.4692	151.338	0	1
7.10905	6.54635	1.22807	57.2377	14.0556	0	1
6.60203	5.53835	1.03897	58.3705	21.5304	0	1
7.33045	4.78465	0.89758	68.5545	134.908	0	1
6.56377	4.4	0.825421	100.814	87.5228	0	1
7.46758	5.57367	1.0456	74.3595	177.038	0	1
7.23396	4.62547	0.867718	64.6934	144.369	0	1
7.40076	4.98473	0.935114	68.3311	52.1986	0	1
7.47495	6.98475	1.31031	76.5599	80.3221	0	1
6.85853	4.59947	0.86284	68.221	167.466	0	1
6.45806	5.97742	1.12134	63.2516	90.6073	0	1
8.82195	6.47412	1.21452	88.9462	61.7734	0	1
6.41687	2.81205	0.527528	103.299	38.5282	0	1
6.11923	2.65	0.497128	118.573	42.4279	0	1
7.12426	7.55621	1.41751	79.1716	28.6671	0	1
6.09006	2.19137	0.411091	124.368	154.655	0	1
7.03448	5.92042	1.11065	64.1034	141.909	0	1
5.82555	2.64619	0.496414	132.199	120.849	0	1
6.82955	4.99621	0.937268	79.7664	131.705	0	1
6.96384	4.99548	0.93713	51.2056	165.567	0	1
6.60052	2.64948	0.497032	104.075	76.5	0	1
8.44161	7.14426	1.34023	64.9284	22.6604	0	1
6.91585	6.89756	1.29395	71.9695	60.8638	0	1
6.65829	2.21357	0.415256	119.399	186.02	0	1
7.69438	6.88764	1.29209	76.3517	33.7612	0	1
7.18847	4.24407	0.796169	71.8481	54.2862	0	1
7.21839	5.00985	0.939826	73.4548	89.3657	0	1
7.5649	4.82633	0.905398	62.7148	140.629	0	1
7.7424	4.92308	0.923548	66.4794	164.166	0	1
6.21382	5.33388	1.00061	62.5049	129.111	0	1
6.75184	4.8231	0.904792	69.8968	150.496	0	1
6.61198	4.90365	0.919903	52.6875	70.4137	0	1
6.73176	7.1295	1.33746	56.6619	176.594	0	1
6.40385	5.8022	1.08847	75.7115	102.914	0	1
6.37384	5.21268	0.977876	69.103	121.399	0	1
7.92059	3.55588	0.667068	53.3206	12.2589	0	1
5.9375	4.19922	0.787755	116.328	79.7813	0	1
7.55882	6.52647	1.22434	62.2838	17.4231	0	1
7.86623	6.32675	1.18687	68.6765	48.5641	0	1
6.96016	5.62099	1.05447	66.6239	187.642	0	1
7.81229	7.4701	1.40136	80.2309	59.5243	0	1
6.76984	5.24868	0.984629	55.9709	136.074	0	1
6.79887	7.56955	1.42001	66.765	113.109	0	1
7.35776	7.02857	1.31853	77.8807	36.5638	0	1
6.33266	4.76471	0.893838	71.071	100.452	0	1
6.75191	6.9084	1.29599	82.771	146.544	0	1
6.49873	6.28244	1.17856	71.6387	70.4424	0	1
6.24479	5.01302	0.940421	52.2578	125.582	0	1
6.19776	3.79104	0.711183	91.2425	93.6853	0	1
6.56481	5.55556	1.0422	58.3519	183.435	0	1
6.97166	5.79555	1.08722	56.8664	171.604	0	1
6.55138	6.07899	1.14039	59.056	111.343	0	1
6.26404	2.34901	0.440665	115.625	83.0839	0	1
6.79736	5.26872	0.988389	62.3987	141.185	0	1
7.06645	7.46029	1.39952	69.5948	120.857	0	1
7.23354	7.8558	1.47371	72.605	100.24	0	1
7.0127	6.39927	1.20048	67.4864	162.734	0	1
6.67477	6.26355	1.17501	74.071	150.417	0	1
5.81866	2.4717	0.46368	92.9602	171.007	0	1
7.34466	6.90291	1.29496	70.1602	46.6594	0	1
6.16797	2.67578	0.501965	72.7812	73.9482	0	1
7.18207	6.21569	1.16604	65.3109	92.7309	0	1
5.5563	2.27563	0.426898	91.2924	181.962	0	1
6.76761	5.30986	0.996106	56.6479	112.26	0	1
7.84236	6.5728	1.23303	73.5475	36.8786	0	1
6.64693	4.61404	0.865573	53.2412	145.156	0	1
5.72772	2.66584	0.5001	90.1609	80.1369	0	1
5.985	5.555	1.04209	56.8162	195.595	0	1
8.42992	7.71496	1.44729	63.5748	13.0314	0	1
5.97665	3.77432	0.708046	65.2335	99.3271	0	1
5.53659	2.17886	0.408745	83.7642	181.597	0	1
6.06159	4.95462	0.929465	51.9028	105.351	0	1
7.09266	6.95753	1.3052	75.4903	92.1845	0	1
5.91089	2.31931	0.435092	102.144	71.5981	0	1
7.20181	7.62048	1.42957	71.8584	137.48	0	1
6.34109	4.64858	0.872053	43.9276	188.801	0	1
6.45186	10.027	1.88101	59.4211	171.592	0	1
6.88863	7.04872	1.32231	54.7796	162.388	0	1
6.45847	2.53156	0.47491	109.103	68.4954	0	1
6.3624	5.76703	1.08187	56.7425	155.228	0	1
6.02078	2.68571	0.503828	99.8649	86.3158	0	1
7.57677	5.93458	1.1133	74.3138	55.9132	0	1
5.86525	3.1773	0.596049	88.9504	179.909	0	1
6.8951	5.88811	1.10458	56.5734	120.771	0	1
5.83904	5.34075	1.0019	54.5394	196.336	0	1
7.91497	4.80952	0.902246	73.9184	33.9404	0	1
6.97492	5.05015	0.947387	53.7639	97.2245	0	1
7.48016	5.90476	1.10771	63.164	47.4114	0	1
6.18819	5.08856	0.954592	77.4723	114.592	0	1
6.64286	6.34127	1.18959	56.6865	105.184	0	1
7.90361	6.40635	1.2018	64.2234	21.9741	0	1
5.5457	2.8871	0.541607	78.5323	187.831	0	1
6.84236	4.75318	0.891677	63.7882	134.696	0	1
6.79452	6.65949	1.24929	59.5773	143.687	0	1
6.58675	5.45426	1.0232	68.9101	87.8872	0	1
5.94794	6.01302	1.12802	52.6312	174.855	0	1
7.17373	5.4428	1.02104	62.553	168.369	0	1
7.20455	7.30455	1.3703	71.7167	113.778	0	1
7.56805	5.68442	1.06637	60.1223	57.9019	0	1
5.64158	4.02509	0.755089	52.2975	203.244	0	1
5.74219	2.375	0.44554	110.402	96.0185	0	1
6.03198	8.46908	1.58876	58.2239	157.954	0	1
5.65354	2.48819	0.466773	98.8819	127.5	0	1
6.44691	5.11852	0.960212	50.6395	184.084	0	1
7.30435	9.60041	1.801	86.0166	79.6479	0	1
7.95144	5.28237	0.99095	75.1924	106.07	0	1
7.53537	4.11701	0.772332	81.1748	12.92	0	1
5.99277	6.48675	1.21689	47.2627	176.381	0	1
6.13346	7.7118	1.4467	66.2959	168.563	0	1
9.1206	7.22613	1.35559	81.4874	52.0022	0	1
7.23006	5.22449	0.980091	81.8015	65.96	0	1
6.58854	4.92969	0.924788	38.0729	204.438	0	1
7.80194	7.7068	1.44576	83.5398	119.303	0	1
7.23457	5.2037	0.976192	65.084	22.44	0	1
6.88388	3.93588	0.738353	52.6984	151.731	0	1
7.15308	6.25624	1.17364	67.0699	89.4206	0	1
6.35342	6.02055	1.12943	48.0685	162.146	0	1
6.70732	4.81205	0.90272	75.7446	99.301	0	1
8.53646	4.19097	0.786208	69.7795	44.6035	0	1
6.14133	2.60171	0.48807	83.0749	34.7865	0	1
6.73655	8.29128	1.55541	63.7458	132.288	0	1
5.97659	3.801	0.713052	41.1371	198.735	0	1
6.74818	4.60533	0.863939	67.4915	76.931	0	1
6.04139	5.39869	1.01277	50.0588	181.469	0	1
6.99861	5.40669	1.01427	64.4011	108.225	0	1
5.89803	5.4347	1.01953	40.0537	210.481	0	1
6.40909	2.3262	0.436386	100.759	31.96	0	1
7.17305	6.90352	1.29507	71.6907	68.68	0	1
5.69212	3.02709	0.56787	78.5493	143.675	0	1
8.44	5.63619	1.05732	74.381	56.44	0	1
6.86612	5.25378	0.985587	64.475	100.3	0	1
6.51919	4.58465	0.86006	58.2235	90.44	0	1
6.53655	6.24728	1.17196	55.3966	163.54	0	1
8.47273	5.21136	0.977629	61.5614	24.82	0	1
6.60237	6.72404	1.2614	48.5994	197.028	0	1
7.23984	6.5935	1.23691	64.8923	124.1	0	1
6.36762	7.09143	1.33032	53.2933	186.66	0	1
8.20678	6.5	1.21937	71.6305	64.26	0	1
6.04129	4.97666	0.9336	45.2136	215.821	0	1
5.46257	2.41043	0.452186	88.6484	143.82	0	1
6.81589	7.9186	1.4855	55.6667	171.7	0	1
6.37598	3.24181	0.608149	50.3479	109.82	0	1
6.96816	7.69663	1.44385	56.5412	154.36	0	1
6.76992	5.91579	1.10978	59.1549	130.095	0	1
6.61022	4.31949	0.810317	53.2604	100.53	0	1
7.12486	5.37012	1.00741	55.1594	114.992	0	1
6.45402	5.4069	1.01431	42.4575	214.322	0	1
8.15401	4.33507	0.81324	62.1634	57.3785	0	1
7.49464	5.21964	0.979182	58.9714	25.5	0	1
8.34234	4.21236	0.790219	64.9022	64.6572	0	1
7.59701	7.07612	1.32745	54.8687	157.659	0	1
7.72258	4.7129	0.88412	95.5065	31.62	0	1
6.30662	5.29637	0.993575	51.6533	121.624	0	1
7.32063	7.76032	1.4558	59.7698	134.488	0	1
5.05735	3.08244	0.578252	51.9355	201.214	0	1
6.08595	4.40807	0.826935	36.707	186.872	0	1
6.30702	1.97368	0.370255	89.6535	18.4385	0	1
6.17034	6.29662	1.18122	41.7885	208.877	0	1
9.05906	5.68898	1.06723	73.4409	57.5233	0	1
6.50104	1.83438	0.344121	97.5406	6.02482	0	1
9.24455	3.11542	0.584438	84.1719	39.4312	0	1
8.01865	4.88666	0.916716	53.7633	22.6961	0	1
6.99124	7.21022	1.35261	51.5372	149.298	0	1
5.50643	5.28278	0.991026	40.2596	159.652	0	1
6.64706	6.61656	1.24124	38.5163	205.999	0	1
7.47404	3.94357	0.739796	75.1896	29.9084	0	1
6.58574	6.03905	1.1329	50.8981	116.449	0	1
6.68012	6.14596	1.15296	48.3075	157.485	0	1
6.42895	8.80965	1.65265	39.8472	197.593	0	1
8.39651	3.98731	0.748002	53.2728	20.3461	0	1
9.13598	5.56799	1.04453	65.6303	53.4319	0	1
6.88514	6.44595	1.20923	40.6639	209.996	0	1
6.08516	2.76156	0.518056	95.5401	124.669	0	1
7.30769	7.72398	1.44899	53.6561	113.167	0	1
7.7145	3.14051	0.589146	78.0404	85.2994	0	1
9.41734	4.76886	0.894617	61.5265	17.2162	0	1
6.08642	2.45844	0.461192	75.6716	102.881	0	1
6.45041	2.44421	0.458524	97.7934	93.2084	0	1
6.09398	2.2782	0.42738	77.9549	109.012	0	1
5.79911	2.20536	0.413715	53.0982	151.203	0	1
6.18852	2.16803	0.406713	56.9467	160.039	0	1
7.7945	3.29088	0.617355	97.4689	79.6646	0	1
11.4165	9.11568	1.71006	99.3393	43.9666	0	1
10.0494	6.0925	1.14293	70.2026	33.3217	0	1
7.50809	5.33657	1.00112	64.4806	72.0303	0	1
8.65028	3.89414	0.730524	57.1229	84.6511	0	1
10.4461	10.0293	1.88146	83.8891	28.177	0	1
9.4246	4.90481	0.920121	69.7829	1.02	0	1
7.41469	5.58639	1.04798	73.5454	94.3884	0	1
9.50355	6.65485	1.24842	66.3121	15.2697	0	1
7.97409	5.16684	0.969276	74.1347	58.8603	0	1
8.42088	6.22391	1.16758	55.5808	1.36	0	1
5.99476	3.46073	0.649218	41.3333	198.658	0	1
6.66925	3.09302	0.580238	59.0646	130.767	0	1
8.85357	7.175	1.346	81.3429	18.0712	0	1
7.5187	5.14146	0.964516	54.5561	4.80833	0	1
6.74521	4.32877	0.812058	51.9507	140.538	0	1
7.91194	7.91194	1.48425	47.7587	150.778	0	1
6.73486	3.19381	0.599145	65.7604	190.071	0	1
7.18636	4.89403	0.918099	63.1486	167.623	0	1
7.58747	5.99217	1.1241	77.9974	127.842	0	1
7.00868	5.35141	1.0039	69.9132	100.668	0	1
7.2133	7.98745	1.49841	81.1982	80.6151	0	1
6.78723	3.80984	0.714709	51.1303	3.61425	0	1
7.19424	6.18945	1.16111	78.5532	115.98	0	1
7.48865	5.78772	1.08575	80.4272	142.179	0	1
7.54399	7.7346	1.45098	75.4927	62.3304	0	1
6.15905	3.11883	0.585079	67.6472	162.708	0	1
5.8972	2.11682	0.397107	105.956	186.957	0	1
7.03081	5.57125	1.04514	81.4698	122.977	0	1
7.12755	7.34694	1.37825	83.1046	101.847	0	1
6.91469	3.78199	0.709485	55.59	180.05	0	1
6.91333	4.71467	0.884451	52.6147	10.1887	0	1
6.26742	4.88315	0.916057	72.9348	102.894	0	1
7.06396	5.47601	1.02728	65.4477	72.3881	0	1
6.20779	3.69697	0.693535	52.6039	179.976	0	1
6.69471	7.15024	1.34135	65.9315	111.325	0	1
8.03373	5.54277	1.0398	57.9747	4.3007	0	1
6.68014	6.893	1.2931	55.8298	94.3002	0	1
6.43664	4.75514	0.892043	60.1455	154.833	0	1
6.70213	5.20949	0.977278	64.6088	162.119	0	1
7.44917	6.37234	1.19542	72.0319	77.42	0	1
5.72089	2.52865	0.474364	72.0776	44.2484	0	1
6.56224	6.40629	1.20179	67.9945	132.588	0	1
8.30093	6.52431	1.22393	72.5289	25.9494	0	1
6.61559	5.79435	1.087	61.9113	58.6192	0	1
6.69164	6.45533	1.21099	58.3458	13.3339	0	1
6.58293	4.47826	0.840102	55.8631	157.539	0	1
6.84839	4.23676	0.794798	65.0561	90.9428	0	1
6.7703	4.6485	0.872039	56.4113	195.035	0	1
5.8511	3.81049	0.714831	61.5821	129.254	0	1
5.88356	2.33219	0.437509	81.9229	65.8416	0	1
7.55959	5.62477	1.05518	83.3715	55.371	0	1
7.98636	7.85675	1.47389	63.352	1.36	0	1
7.97436	8.22537	1.54304	67.6478	24.1615	0	1
6.69401	6.24609	1.17174	67.5911	117.694	0	1
6.40651	5.34861	1.00338	55.3957	131.386	0	1
6.73678	4.53584	0.850904	55.5323	81.9294	0	1
6.67313	6.32836	1.18717	64.7224	127.931	0	1
6.2467	5.38795	1.01076	65.8701	63.0789	0	1
6.14368	4.65517	0.87329	65.0517	75.0161	0	1
7.9349	7.50281	1.40749	61.4534	21.08	0	1
6.51223	3.37452	0.633045	67.1544	151.397	0	1
6.21242	4.84858	0.909573	56.5969	42.1723	0	1
6.01382	4.2235	0.792311	43.0484	197.91	0	1
5.87119	4.01356	0.752926	41.4441	188.389	0	1
6.08232	3.58384	0.672313	40.6768	187.063	0	1
6.43829	5.24181	0.983341	56.2632	139.441	0	1
6.7268	6.76078	1.26829	69.9556	116.62	0	1
7.13005	4.65137	0.872576	68.7661	61.88	0	1
6.22082	5.6737	1.06436	45.6174	180.54	0	1
6.67825	4.89462	0.918209	65.3139	86.36	0	1
7.0682	4.35639	0.817239	59.1921	35.36	0	1
6.09827	5.74502	1.07774	46.5392	209.211	0	1
5.37657	2.4597	0.461429	85.9584	131.24	0	1
5.67601	4.95447	0.929436	36.0595	190.691	0	1
6.63597	5.84317	1.09615	54.4547	121.04	0	1
6.51157	6.15625	1.15489	49.6516	172.624	0	1
4.89945	2.68556	0.503799	58.0311	111.926	0	1
5.91837	5.58601	1.04791	36.4548	196.188	0	1
6.09204	6.82215	1.27981	45.5413	154.242	0	1
6.17568	4.16602	0.781528	53.2355	90.1301	0	1
8.53125	3.73077	0.699876	88.5553	31.545	0	1
6.97188	4.60721	0.864292	70.5	52.3037	0	1
8.12044	4.813	0.902897	66.9208	30.5338	0	1
8.24436	3.24812	0.609333	110.139	56.4328	0	1
6.69518	4.04044	0.757968	34.6905	204.274	0	1
6.85072	4.67464	0.876942	34.5407	167.91	0	1
6.5913	3.64783	0.684316	44.6696	177.036	0	1
7.13365	5.24057	0.983107	52.0047	12.5984	0	1
6.96461	4.13584	0.775866	71.5365	97.8379	0	1
8.15142	5.54259	1.03977	63.1167	56.572	0	1
6.975	2.88214	0.540677	117.204	56.7963	0	1
7.45134	5.71831	1.07273	68.2049	67.6737	0	1
7.8	6.35896	1.19291	64.2645	36.6191	0	1
7.47984	5.42742	1.01816	74.4919	179.772	0	1
7.2623	6.99016	1.31132	68.0328	45.8496	0	1
6.88006	7.20249	1.35116	72.296	71.3231	0	1
6.85991	6.85453	1.28588	65.2522	79.2193	0	1
6.4055	2.85911	0.536356	125.722	152.252	0	1
5.58781	2.5233	0.47336	95.6452	109.276	0	1
7.58837	3.97987	0.746605	82.9452	65.1985	0	1
6.86607	4.35842	0.81762	59.463	190.325	0	1
6.43499	4.04793	0.759375	59.5303	82.9718	0	1
6.55689	5.45659	1.02363	56.9731	67.9736	0	1
7.29825	5.59398	1.04941	58.6429	42.3911	0	1
7.16073	6.22618	1.168	59.0631	28.4342	0	1
6.7058	5.59784	1.05013	65.3765	137.469	0	1
6.37139	5.09615	0.956016	67.4663	104.941	0	1
6.72222	3.72493	0.698781	49.8279	6.02482	0	1
6.60428	5.19679	0.974895	53.8989	67.7445	0	1
6.43196	3.40412	0.638599	64.2763	118.93	0	1
6.62228	4.52707	0.849258	50.2993	165.089	0	1
6.21182	5.31363	0.996814	57.5698	102.396	0	1
6.45098	4.99477	0.936997	57.7974	143.885	0	1
6.70704	5.30933	0.996007	56.8331	13.5489	0	1
5.91137	3.25084	0.609843	48.2726	148.471	0	1
6.88141	7.60547	1.42675	69.9761	75.454	0	1
6.66369	5.68155	1.06583	56.6131	138.72	0	1
6.48281	5.13467	0.963242	52.0401	159.479	0	1
6.83699	5.21918	0.979095	58.1274	88.876	0	1
6.94406	6.49825	1.21904	61.6136	66.4846	0	1
7.46799	4.03272	0.75652	54.4979	8.00265	0	1
6.62244	5.63064	1.05628	58.7811	115.76	0	1
6.55471	5.27226	0.989054	58.2557	181.116	0	1
5.22115	2.07212	0.38872	63.1923	145.568	0	1
7.34385	5.80565	1.08911	64.8289	73.8708	0	1
5.97638	3.83465	0.719363	44.6173	161.569	0	1
5.72438	4.94346	0.927372	64.3657	111.419	0	1
6.08584	4.4058	0.826508	49.8038	191.021	0	1
8.33295	6.48312	1.2162	70.1036	31.5395	0	1
6.61111	6.1929	1.16176	51.4444	172.282	0	1
9.43405	7.76114	1.45596	66.0116	2.72	0	1
7.42368	6.20841	1.16467	65.6575	140.651	0	1
7.03698	6.76045	1.26823	57.828	51.3659	0	1
6.52333	5.41	1.01489	53.9011	122.932	0	1
5.92318	4.05762	0.761191	45.0615	205.66	0	1
6.52948	4.95991	0.930457	48.0354	169.236	0	1
7.44717	6.73585	1.26362	65.3321	103.954	0	1
6.7386	8.34737	1.56593	71.5193	135.742	0	1
6.95652	4.86211	0.912111	58.1068	89.9048	0	1
6.01165	4.86855	0.913319	42.7587	179.729	0	1
6.63376	5.52568	1.03659	53.7272	166.747	0	1
8.75302	9.10648	1.70834	69.4742	54.06	0	1
6.46903	6.72861	1.26226	59.885	116.838	0	1
5.37679	4.16693	0.781698	36.9459	207.241	0	1
7.83219	4.75799	0.892578	64.5468	63.58	0	1
6.28468	6.81062	1.27764	68.462	77.52	0	1
7.18223	4.74176	0.889533	58.9441	42.8414	0	1
6.34874	5.25735	0.986256	52.1218	150.623	0	1
6.33983	5.94986	1.11617	57.993	125.15	0	1
6.61841	5.49638	1.0311	61.6867	83.4359	0	1
6.06721	5.60164	1.05084	51.5393	26.86	0	1
5.27153	2.15328	0.403947	64.2117	153	0	1
7.79757	5.29352	0.993042	59.6174	25.16	0	1
5.98496	4.76316	0.893548	35.3246	199.073	0	1
8.18401	4.81503	0.903278	60.8276	29.92	0	1
6.62144	2.02407	0.379707	85.6214	14.28	0	1
8.27863	3.66817	0.688133	60.2453	2.04	0	1
5.52645	2.27204	0.426225	48.9018	175.652	0	1
6.09623	4.01674	0.753522	40.1464	211.851	0	1
7.01345	2.67731	0.502252	64.5731	41.6802	0	1
5.92532	2.75974	0.517715	40.5812	170.233	0	1
7.34703	3.42314	0.642165	51.0228	141.516	0	1
8.76642	7.18431	1.34774	61.6423	24.2713	0	1
6.64392	4.82729	0.905579	49.1109	70.176	0	1
7.21656	5.75955	1.08047	59.2341	20.4255	0	1
6.91837	5.74568	1.07786	64.6107	107.522	0	1
7.29872	4.90641	0.920421	51.8397	27.149	0	1
5.89086	2.50508	0.469941	97.566	134.831	0	1
7.21033	5.79582	1.08727	58.7208	24.4351	0	1
7.99728	6.44701	1.20943	61.6087	15.3942	0	1
6.17532	4.43182	0.83139	101.779	42.5815	0	1
7.2696	5.94418	1.1151	60.4644	31.7003	0	1
6.63586	3.26744	0.612958	81.9449	170.846	0	1
6.72921	6.08683	1.14186	65.4945	122.691	0	1
6.72635	5.37162	1.00769	66.0743	143.485	0	1
6.36802	5.03922	0.945335	56.629	157.253	0	1
6.32684	4.54423	0.852477	53.8726	57.1362	0	1
6.6643	6.91297	1.29684	66.6767	149.505	0	1
6.41546	4.22826	0.793203	63.4577	127.366	0	1
6.70919	4.23868	0.795158	51.1091	176.634	0	1
6.16709	5.51403	1.03441	55.8202	76.5695	0	1
5.46137	2.24701	0.421529	77.6594	153.649	0	1
6.13306	5.15457	0.966975	53.9234	189.625	0	1
6.08316	4.2474	0.796794	49.4387	178.174	0	1
6.32204	4.62299	0.867252	78.4969	106.237	0	1
6.00174	4.01562	0.753314	44.6094	185.709	0	1
6.27048	4.57496	0.858243	54.4312	122.3	0	1
5.60414	4.55351	0.854219	55.5581	100.916	0	1
5.52304	2.46889	0.463154	80.2742	141.734	0	1
5.37079	2.35955	0.442641	72.3184	149.803	0	1
7.25665	4.99218	0.93651	55.8232	44.8813	0	1
7.11835	6.43974	1.20807	59.8708	92.5756	0	1
6.13205	4.59784	0.862535	53.0828	157.983	0	1
6.43833	5.61784	1.05388	63.9945	79.1499	0	1
6.00332	4.0365	0.757231	41.8473	194.681	0	1
5.99896	2.58021	0.484036	74.3375	107.102	0	1
6.18414	5.38385	1.00999	46.7649	177.042	0	1
7.86129	4.04792	0.759372	48.6772	2.38	0	1
6.51638	5.06987	0.951085	51.9138	95.4426	0	1
7.29167	5.32396	0.998751	59.6875	51.68	0	1
6.153	5.01102	0.940045	39.8739	199.282	0	1
6.81217	5.88757	1.10448	51.2778	114.58	0	1
6.19409	4.48664	0.841674	53.4388	3.06	0	1
5.73077	3.06469	0.574922	60.2448	102.903	0	1
8.40154	6.21326	1.16558	56.7618	17.37	0	1
6.336	2.782	0.521891	52.25	150.618	0	1
5.9475	2.47887	0.465026	57.8656	121.701	0	1
9.16869	4.7051	0.882656	66.9381	7.88624	0	1
6.742	2.4371	0.457189	55.6695	102.566	0	1
7.09551	4.8466	0.909201	54.6816	52.0211	0	1
8.2781	5.24334	0.983627	57.8076	12.5386	0	1
7.2937	2.62426	0.492299	114.593	80.5276	0	1
7.09367	4.52639	0.84913	69.0277	136.096	0	1
7.16572	4.72805	0.886961	64.9164	152.394	0	1
7.47912	5.27378	0.989338	72.0858	122.257	0	1
6.83952	2.97771	0.558606	95.7935	185.34	0	1
6.31965	4.67164	0.87638	48.9179	88.9553	0	1
5.82246	3.07246	0.576381	124.99	108.11	0	1
8.13469	5.36143	1.00578	58.5601	12.776	0	1
7.24679	4.23718	0.794876	66.5449	180.215	0	1
6.58136	4.38136	0.821923	51.8017	165.365	0	1
6.81541	4.6061	0.864085	58.1206	189.827	0	1
8.58134	7.21475	1.35346	61.8384	17.9525	0	1
6.78431	4.6365	0.869787	57.5128	187.489	0	1
6.40977	4.55902	0.855253	55.403	87.7022	0	1
5.63178	3.28101	0.615503	57.4651	124.782	0	1
7.39356	6.19188	1.16157	52.9986	46.4719	0	1
7.17922	5.44863	1.02214	56.0811	59.0984	0	1
6.82229	4.36446	0.818753	63.4207	85.6287	0	1
5.79713	3.45492	0.648128	49.2705	151.797	0	1
6.69669	5.56291	1.04358	53.5682	130.576	0	1
5.39008	4.07769	0.764956	41.3372	180.447	0	1
6.05483	2.37187	0.444953	97.3468	55.0779	0	1
7.47732	5.51474	1.03454	63.4717	66.2799	0	1
6.6846	3.43228	0.643881	70.6698	32.0755	0	1
5.21546	2.11027	0.395877	68.8809	182.482	0	1
7.14706	5.94013	1.11434	55.5305	133.538	0	1
7.61489	4.89428	0.918146	58.931	3.4	0	1
5.93881	4.27313	0.801621	31.6075	213.949	0	1
6.21596	6.06602	1.13796	52.0206	154.972	0	1
5.83827	4.65915	0.874036	34.2178	206.511	0	1
5.8457	1.58008	0.296416	77.9062	34	0	1
6.23088	6.32353	1.18627	44.0926	188.698	0	1
6.41283	3.92857	0.736983	58.7603	91.5813	0	1
6.33333	4.54582	0.852775	47.8353	105.037	0	1
5.47101	2.27295	0.426395	40.2802	175.28	0	1
6.71225	2.66097	0.499186	58.1966	145.492	0	1
7.15802	3.34074	0.626708	48.0321	153.942	0	1
7.09231	4.67115	0.876288	54.3365	52.4703	0	1
6.34488	4.49849	0.843898	44.863	34.1696	0	1
7.25869	2.9096	0.545828	79.6676	81.7415	0	1
8.72712	4.77288	0.895371	56.5114	41.8766	0	1
8.53073	5.17691	0.971165	75.7244	175.698	0	1
7.8529	7.39136	1.38659	62.9514	18.7771	0	1
6.84392	2.95503	0.55435	111.492	95.1441	0	1
7.60446	5.91504	1.10964	59.7006	65.9021	0	1
7.06829	4.12269	0.773398	60.3067	163.006	0	1
6.96848	8.90545	1.67062	65.9479	75.0045	0	1
7.01973	6.6942	1.2558	63.7855	43.3243	0	1
6.47322	3.97278	0.745277	83.9947	129.401	0	1
5.79823	3.8354	0.719504	58.6885	94.4399	0	1
6.63937	5.76354	1.08121	51.2008	135.96	0	1
5.54035	2.07251	0.388795	84.5731	105.645	0	1
6.18995	3.68922	0.692082	65.1397	173.501	0	1
6.30183	5.09909	0.956566	53.2988	72.4934	0	1
6.84708	4.72133	0.8857	56.2002	152.72	0	1
6.22631	5.84866	1.09718	55.0495	140.903	0	1
6.00897	4.08221	0.765805	51.3602	88.6722	0	1
6.14377	7.85115	1.47284	56.6768	100.01	0	1
6.90075	5.60678	1.05181	54.0603	46.9175	0	1
6.62523	3.59598	0.67459	42.1133	195.6	0	1
6.58416	5.814	1.09068	54.8013	137.017	0	1
6.74419	5.82703	1.09313	60.3198	66.7449	0	1
6.96401	4.40231	0.825855	47.8811	167.962	0	1
6.64532	5.39039	1.01121	58.3966	116.608	0	1
5.71457	4.2006	0.788014	54.1587	194.618	0	1
6.42348	4.16048	0.780487	54.5765	74.3512	0	1
5.13975	2.29038	0.429665	74.1525	167.701	0	1
5.7426	5.35877	1.00528	47.8895	110.364	0	1
5.59338	2.3617	0.443045	88.8901	87.9332	0	1
8.17282	6.70194	1.25725	59.733	24.14	0	1
6.26186	3.3055	0.620098	82.334	135.66	0	1
5.9591	5.04654	0.94671	36.2652	208.901	0	1
6.5176	5.62712	1.05562	59.7458	122.153	0	1
6.03739	4.28468	0.803787	36.8058	203.294	0	1
5.67336	4.00547	0.751409	52.4507	67.6292	0	1
6.66952	5.19679	0.974895	47.2856	138.38	0	1
6.828	3.98	0.746631	57.163	34.68	0	1
5.63583	3.23622	0.607101	47.3839	122.74	0	1
6.26062	4.65722	0.873675	49.068	115.548	0	1
8.72701	6.96635	1.30686	75.7493	74.4879	0	1
5.05993	2.89139	0.542411	27.3146	215.498	0	1
7.40791	3.89768	0.731188	82.6903	22.4142	0	1
7.39559	5.17794	0.971359	57.4	10.0688	0	1
6.11902	2.56224	0.480666	34.5431	208.491	0	1
6.16357	2.65242	0.497582	64.7472	92.9345	0	1
6.70317	4.11346	0.771666	44.7045	129.716	0	1
6.4755	3.76369	0.706052	38.5043	157.837	0	1
8.8576	4.2528	0.797807	81.0656	39.6301	0	1
7.91469	2.40166	0.450541	80.1114	24.257	0	1
9.41231	6.28462	1.17897	70.8354	126.14	0	1
8.2905	6.97323	1.30815	70.7108	113.601	0	1
7.73608	5.80931	1.0898	70.5149	103.901	0	1
7.14495	5.31625	0.997306	67.4612	119.041	0	1
6.83208	2.2717	0.426161	82.7943	99.1087	0	1
8.02551	6.21481	1.16587	68.5547	145.166	0	1
7.62878	4.02158	0.754431	55.7065	192.653	0	1
6.28829	2.85135	0.534901	117.577	157.864	0	1
6.83333	5.14758	0.965664	56.014	150.096	0	1
6.81501	2.01953	0.378854	87.5457	23.5804	0	1
6.18491	6.1283	1.14964	59.4509	53.5659	0	1
6.54152	5.47251	1.02662	55.5696	57.0248	0	1
6.10501	5.63813	1.05769	49.7851	95.4426	0	1
6.58269	6.17465	1.15834	50.8624	37.0974	0	1
6.32752	4.49564	0.843363	48.5293	127.131	0	1
6.37922	6.3229	1.18615	43.9437	174.002	0	1
10.3333	4.10212	0.76954	115.815	68.0136	0	1
6.16643	4.86601	0.912842	50.7094	163.048	0	1
6.30659	4.89112	0.917552	38.6648	205.864	0	1
6.91628	6.30698	1.18316	59.05	38.42	0	1
7.37105	5.91185	1.10904	59.6968	47.7213	0	1
6.8018	5.74575	1.07788	54.1331	125.287	0	1
6.04379	5.57768	1.04635	52.8573	72.1954	0	1
6.69372	3.94356	0.739795	53.3069	171.624	0	1
7.93515	5.68032	1.0656	56.76	5.78	0	1
5.27088	2.07637	0.389518	54.7721	173.269	0	1
5.88402	5.22938	0.981009	49.2809	116.959	0	1
5.6561	2.41463	0.452975	46.189	172.039	0	1
7.34752	2.76241	0.518216	43.2837	153.603	0	1
8.52524	5.32116	0.998226	54.8561	41.4925	0	1
8.23919	6.19593	1.16233	69.9237	26.4786	0	1
7.90629	7.13007	1.33757	71.1175	89.962	0	1
7.50922	3.71659	0.697216	81.1935	79.7226	0	1
6.31693	3.29921	0.618918	85.4665	81.2166	0	1
5.98895	5.45166	1.02271	49.8356	63.4089	0	1
7.73797	4.80392	0.901195	47.4153	192.337	0	1
6.60069	4.08238	0.765837	55.5652	121.941	0	1
6.14	4.27429	0.801837	46.8571	147.44	0	1
7.38114	7.16999	1.34506	49.2908	190.519	0	1
5.69312	2.76896	0.519445	84.0829	125.113	0	1
8.03448	6.51254	1.22172	56.2038	183.968	0	1
6.35623	6.21883	1.16663	49.1183	135.96	0	1
6.74766	6.08144	1.14085	53.7904	147.668	0	1
6.40816	6.38889	1.19853	59.5045	77.2818	0	1
5.79705	4.54367	0.852372	38.6863	172.471	0	1
6.02591	5.17746	0.971269	32.9909	203.302	0	1
9.22222	6.55068	1.22888	59.6228	11.56	0	1
5.70858	2.32934	0.436974	87.3453	115.142	0	1
5.8403	4.51584	0.847152	35.6401	201.277	0	1
6.48803	5.20981	0.977337	54.4413	99.6571	0	1
6.8565	4.89153	0.917629	53.7164	55.7569	0	1
6.60889	3.40667	0.639076	76.0733	27.88	0	1
7.77907	5.50258	1.03226	64.6835	51.8408	0	1
5.78349	4.13761	0.776198	47.6844	96.7926	0	1
7.43939	2.92045	0.547865	66.2917	47.9496	0	1
6.42263	2.46882	0.46314	56.388	103.668	0	1
8.01807	3.54217	0.664495	54.1717	38.6241	0	1
7.04	3.005	0.563725	61.1525	102.93	0	1
7.54954	6.01054	1.12755	72.7098	12.2069	0	1
6.91121	5.35981	1.00548	68.8668	80.7634	0	1
5.78297	2.99725	0.562272	52.9038	173.766	0	1
6.9163	3.85463	0.723111	51.6211	158.443	0	1
6.97789	4.75895	0.892758	60.4274	100.199	0	1
6.49498	5.64381	1.05875	53.3512	112.554	0	1
6.14787	2.35213	0.441249	95.6454	73.9482	0	1
6.09307	5.01825	0.941401	56.1533	99.9629	0	1
6.68439	3.33484	0.625602	51.1776	133.717	0	1
6.7197	4.81439	0.903159	57.679	64.8046	0	1
5.66476	5.36	1.00551	45.8648	159.987	0	1
6.49392	5.84063	1.09568	58.2968	88.3333	0	1
6.34171	4.43384	0.831768	53.6298	63.0496	0	1
6.84188	3.7062	0.695266	57.1421	47.94	0	1
6.07121	4.13788	0.776248	45.6439	66.4959	0	1
7.075	6.26375	1.17505	56.05	127.84	0	1
6.50493	4.00164	0.750691	58.4457	114.58	0	1
7.90228	5.61294	1.05296	59.5609	38.76	0	1
6.5	6.05694	1.13626	51.653	91.6425	0	1
6.78218	2.74059	0.514123	73.8356	37.3644	0	1
7.45824	2.82227	0.529445	74.4475	41.2298	0	1
5.62319	3.64493	0.683772	60.6971	96.3521	0	1
7.38229	6.04484	1.13399	70.8778	105.867	0	1
6.02273	3.43864	0.645073	75.5568	87.0958	0	1
6.21483	4.37368	0.820483	75.8593	179.146	0	1
6.15145	5.46012	1.02429	51.948	141.033	0	1
6.43778	4.30317	0.807255	61.112	130.224	0	1
7.03598	5.74069	1.07693	58.5757	53.7512	0	1
7.00805	6.46782	1.21333	57.8494	45.8105	0	1
7.58312	7.99105	1.49909	67.4015	32.0755	0	1
6.25418	5.52174	1.03585	60.8796	91.2822	0	1
5.41336	4.77437	0.895651	52.1841	78.4877	0	1
6.70405	5.50156	1.03207	66.2118	104.125	0	1
6.23936	4.15691	0.779819	41.5785	197.945	0	1
6.085	2.48167	0.46555	93.2733	155.921	0	1
6.94887	6.41003	1.20249	66.5801	91.2822	0	1
6.04408	5.14325	0.964851	42.489	194.722	0	1
5.42708	2.2	0.41271	75.1125	76.5	0	1
6.97713	6.4721	1.21414	50.8884	1.7	0	1
5.54946	3.51563	0.659518	92.9764	159.017	0	1
6.25101	3.47114	0.651171	70.1651	151.071	0	1
5.44536	2.69278	0.505154	63.8639	183.322	0	1
7.07869	6.86557	1.28795	63.0934	116.424	0	1
6.34239	3.76359	0.706032	45.3247	213.938	0	1
5.6462	2.46688	0.462776	72.5477	136.626	0	1
7.66118	8.45816	1.58671	59.6968	88.8409	0	1
5.93458	5.54673	1.04054	70.3466	17.7973	0	1
5.33807	3.85308	0.722821	50.2686	117.103	0	1
6.73333	5.57908	1.04661	65.3948	61.3434	0	1
7.09898	5.49492	1.03082	63.316	123.971	0	1
7.00304	5.48176	1.02835	54.2766	147.559	0	1
6.69395	6.17705	1.15879	65.4769	7.84951	0	1
6.35385	5.3972	1.01249	56.9021	96.2728	0	1
7.08499	5.16637	0.969188	46.4467	170.12	0	1
6.00902	5.2268	0.980526	61.683	71.2841	0	1
6.07328	2.28879	0.429368	73.5323	75.14	0	1
5.84321	3.30314	0.619654	69.4704	172.131	0	1
4.45408	2.05102	0.384762	42.6607	144.474	0	1
6.06271	3.78475	0.710002	35.4017	201.489	0	1
6.27751	6.76565	1.26921	86.8781	9.4835	0	1
5.34038	2.01174	0.377393	59.993	119.399	0	1
6.67848	7.88631	1.47944	55.1088	21.2139	0	1
6.04209	2.72391	0.510993	74.1852	24.3783	0	1
6.21266	6.40502	1.20155	71.736	15.8493	0	1
7.80656	4.06885	0.763299	69.318	62.2534	0	1
6.55312	5.41653	1.01612	55.4182	116.584	0	1
5.31788	4.44371	0.83362	50.7969	100.411	0	1
4.73179	1.65232	0.309968	47.0464	118.009	0	1
7.47766	5.06873	0.950871	60.3196	55.8439	0	1
101.395	101.081	47.2417	37.3003	27.8406	1	2
86.3846	85.1382	39.7904	38.8917	38.3357	1	2
121.876	69.2709	32.3746	36.408	33.3997	1	2
88.4154	56.455	26.385	35.3154	43.2121	1	2
105.06	65.0714	30.412	39.293	44.9135	1	2
110.329	74.4415	34.7912	38.7631	47.94	1	2
108.048	50.2079	23.4653	29.9672	47.5125	1	2
124.29	56.081	26.2102	34.5971	44.8594	1	2
122.601	70.5708	32.9822	38.3086	46.6804	1	2
120.141	66.1205	30.9023	31.2379	38.1346	1	2
86.7929	38.2651	17.8837	34.974	55.878	1	2
114.581	72.4834	33.876	32.1531	49.5806	1	2
75.2377	45.387	21.2122	33.9273	64.26	1	2
74.9028	47.5094	22.2041	30.238	62.424	1	2
90.1444	34.1976	15.9827	30.9772	71.876	1	2
120.91	68.0073	31.7841	30.1971	68.8599	1	2
66.7201	50.6239	23.6597	30.3929	69.6004	1	2
106.016	86.1102	40.2447	28.79	45.4457	1	2
108.738	58.062	27.136	29.872	85.1834	1	2
108.862	22.7474	10.6313	30.318	90.2154	1	2
93.5332	30.801	14.3953	31.3576	88.8136	1	2
99.2899	26.1009	12.1986	30.5101	103.459	1	2
76.4763	24.913	11.6434	27.4249	113.04	1	2
75.3984	25.502	11.9187	28.2154	118.086	1	2
92.0331	56.1807	26.2567	25.888	102.288	1	2
88.2869	38.9801	18.2178	27.0212	120.968	1	2
104.19	63.349	29.607	35.1675	32.3268	1	2
68.3427	64.9252	30.3436	33.3053	39.0926	1	2
91.7383	53.4842	24.9965	34.1058	40.2078	1	2
107.577	36.5396	17.0773	32.418	74.453	1	2
95.9331	40.4819	18.9197	37.9136	83.0916	1	2
82.706	25.3623	11.8534	27.1532	109.182	1	2
85.2102	24.3054	11.3594	25.7258	116.646	1	2
103.669	28.5631	13.3493	30.3876	113.717	1	2
98.2802	22.9764	10.7383	28.4632	127.577	1	2
87.289	60.5228	28.2861	25.5627	107.01	1	2
83.451	68.0178	31.789	29.0386	32.2427	1	2
119.394	56.9838	26.6321	30.2593	38.7063	1	2
111.972	39.328	18.3804	32.7123	59.8806	1	2
92.6591	34.4502	16.1008	27.4258	72.4806	1	2
98.3662	51.3077	23.9793	26.8478	81.9689	1	2
81.688	26.3865	12.3321	26.5286	108.909	1	2
81.4263	37.3661	17.4635	21.9464	124.416	1	2
91.4792	51.3503	23.9992	27.2242	133.897	1	2
87.6039	64.7002	30.2385	32.6357	33.2332	1	2
76.1728	64.6261	30.2038	29.7372	45.0971	1	2
48.4151	4.82493	2.25499	28.6618	88.1545	1	2
64.4256	23.272	10.8765	22.68	109.564	1	2
59.6266	62.7375	29.3212	23.1774	107.84	1	2
87.5757	82.2537	38.4423	22.435	96.6515	1	2
143.164	48.7944	22.8047	24.8607	119.56	1	2
140.637	36.8413	17.2183	26.0543	126.958	1	2
52.6881	9.42718	4.40591	25.3167	109.902	1	2
146.1	23.1168	10.804	20.9894	180.307	1	2
42.9086	4.30517	2.01208	29.3862	75.0168	1	2
86.8211	38.2584	17.8806	28.6743	99.6409	1	2
85.2188	69.6003	32.5286	20.7796	89.4206	1	2
96.7117	27.2728	12.7463	28.8746	116.658	1	2
75.6927	64.7572	30.2651	20.8664	103.165	1	2
87.3968	22.6261	10.5746	25.4198	134.415	1	2
38.8109	3.36153	1.57105	25.1625	132.628	1	2
22.588	2.51225	1.17413	23.5679	128.648	1	2
76.2908	89.6892	41.9174	18.6335	135.905	1	2
75.1987	26.2219	12.2551	20.8013	165.993	1	2
96.9202	22.1852	10.3685	20.9573	168.84	1	2
87.8692	34.1618	15.9659	25.6041	107.651	1	2
69.3784	42.6627	19.939	27.4431	104.114	1	2
9.5336	1.6087	0.751844	59.83	10.88	0	2
10.5272	1.43537	0.67084	63.4388	6.26929	0	2
10.2725	1.7377	0.812138	39.8279	13.689	0	2
15.3028	2.41578	1.12904	41.3326	25.9494	0	2
11.7856	1.90223	0.889031	36.7547	27.1191	0	2
14.1601	2.71708	1.26986	46.5587	32.9379	0	2
10.4983	1.43857	0.672332	40.901	25.6063	0	2
11.1657	1.87666	0.877082	41.5139	24.2999	0	2
8.69021	2.32714	1.08762	38.4238	4.20557	0	2
9.9392	2.05451	0.9602	34.0231	30.4105	0	2
8.1363	1.74175	0.814029	32.1664	15.699	0	2
10.0311	2.67399	1.24972	39.1685	24.3142	0	2
13.5222	1.68962	0.789665	32.4015	39.6301	0	2
11.6872	3.03141	1.41677	42.4529	36.6459	0	2
10.0626	2.58121	1.20636	40.4266	24.8223	0	2
12.9375	2.11549	0.988701	34.0272	40.9414	0	2
14.9411	2.30893	1.07911	38.1643	47.476	0	2
9.51865	2.68384	1.25433	35.6146	34.7483	0	2
12.3713	2.04426	0.955413	39.5167	62.2609	0	2
12.3259	2.15324	1.00634	30.7885	52.5495	0	2
8.61017	1.39322	0.651139	51.6169	47.674	0	2
11.2007	2.91798	1.36375	34.6073	56.7953	0	2
9.38801	2.66138	1.24383	34.1464	36.935	0	2
12.4451	2.53035	1.18259	36.7717	60.4493	0	2
11.4845	2.14085	1.00055	33.9056	60.7611	0	2
10.7992	3.72394	1.74043	41.6197	37.8852	0	2
9.53209	2.44099	1.14083	28.5797	48.7577	0	2
10.2025	2.79747	1.30743	35.1582	37.3226	0	2
16.4449	1.93483	0.904268	35.5326	65.1187	0	2
11.0033	3.01149	1.40746	32.931	55.5127	0	2
8.75728	2.32233	1.08537	28.0602	58.0046	0	2
11.0223	1.91067	0.892976	29.536	74.0201	0	2
14.6324	1.83589	0.858025	33.86	66.9904	0	2
10.0903	2.57849	1.20509	30.4258	76.8769	0	2
9.77482	3.4891	1.63068	32.2591	56.5546	0	2
9.95382	2.50189	1.16929	38.2808	67.2178	0	2
9.94753	2.62219	1.22551	30.5622	74.1863	0	2
10.8794	2.00813	0.938525	35.0908	94.8606	0	2
8.62924	1.85901	0.868831	55.752	93.6112	0	2
10.6362	3.061	1.4306	34.5817	80.8957	0	2
12.2394	2.7698	1.2945	32.6593	86.8126	0	2
6.83636	3.30909	1.54655	29.2691	64.5105	0	2
9.7289	2.27648	1.06394	35.3303	97.58	0	2
9.97506	2.55556	1.19437	32.381	90.2948	0	2
5.21687	5.20482	2.43254	20.751	71.1925	0	2
8.17647	3.08669	1.4426	27.969	70.9558	0	2
5.66484	4.39286	2.05306	20.7775	82.8164	0	2
8.81207	2.31139	1.08026	37.4417	97.9353	0	2
9.7233	4.38592	2.04982	28.3277	87.3807	0	2
7.23315	2.23034	1.04238	45.1264	79.8891	0	2
10.9577	1.76901	0.826771	29.9831	110.759	0	2
7.47449	2.7449	1.28286	24.25	86.5405	0	2
14.0916	2.33962	1.09345	36.248	119.011	0	2
7.80739	2.01847	0.943357	44.058	105.773	0	2
8.45652	3.73913	1.74753	31.8961	92.1256	0	2
8.49012	1.50988	0.705662	25.083	122.268	0	2
8.41953	3.51715	1.64378	24.1557	90.502	0	2
9.20328	2.18251	1.02003	39.5705	125.878	0	2
6.58798	3.49356	1.63276	17	108.919	0	2
10.4797	1.95217	0.912373	33.3435	129.722	0	2
9.38601	2.91969	1.36455	23.2539	114.196	0	2
10.0599	3.53678	1.65296	26.3733	98.8091	0	2
6.76644	1.52608	0.713232	48.5488	121.54	0	2
6.57143	1.79481	0.838825	38.3299	96.3737	0	2
9.13375	3.09176	1.44497	25.4774	109.237	0	2
8.69244	3.53779	1.65343	27.0299	99.8987	0	2
7.85455	3.90545	1.82526	19.6582	118.592	0	2
9.84927	1.85413	0.866553	31.107	132.316	0	2
13.39	1.86691	0.872526	32.9852	119.684	0	2
10.7043	2.18551	1.02142	28.9014	141.341	0	2
8.51572	3.42138	1.59903	23.5409	127.938	0	2
9.03665	1.61518	0.754876	30.4162	133.715	0	2
7.96591	1.56136	0.729723	30.0977	141.917	0	2
9.90941	1.90418	0.889943	27.0331	142.322	0	2
10.6322	2.07126	0.968032	28.5195	147.525	0	2
11.9644	2.30861	1.07896	34.5252	134.362	0	2
6.9699	2.19064	1.02382	32.2575	134.599	0	2
11.8739	2.03517	0.951162	32.641	142.425	0	2
6.40801	2.08561	0.974736	43.8379	120.068	0	2
8.13399	1.46732	0.685771	48.5621	147.621	0	2
7.25934	1.87253	0.87515	43.2396	147.55	0	2
8.37278	2.49704	1.16702	22.3698	133.218	0	2
8.07801	2.73522	1.27834	22.208	126.052	0	2
7.81633	2.34985	1.09823	26.2566	150.961	0	2
8.57369	2.70206	1.26284	26.8399	144.829	0	2
9.65501	2.71329	1.26809	27.0676	136.655	0	2
9.67525	2.60594	1.21792	25.5703	164.843	0	2
9.01828	2.06947	0.967193	27.1572	168.635	0	2
8.75256	3.85276	1.80064	25.3926	134.493	0	2
9.88454	3.00372	1.40383	28.1229	167.563	0	2
7.59221	2.32727	1.08768	21.826	144.52	0	2
8.41776	2.06579	0.965473	28.9342	164.552	0	2
9.52888	2.44681	1.14355	24.4407	170.585	0	2
12.4727	1.86061	0.869578	32.4	155.809	0	2
8.80082	1.9692	0.92033	27.1745	176.579	0	2
6.85106	1.15957	0.541942	44.0301	160.042	0	2
8.13625	1.81234	0.84702	25.6581	179.854	0	2
6.97688	2.24085	1.04729	36.9229	147.265	0	2
10.0355	1.70806	0.798286	29.2097	164.698	0	2
8.81481	2.76235	1.29102	22.3457	163.927	0	2
7.63007	1.65871	0.77522	22.1169	185.867	0	2
9.23851	1.83621	0.858175	29.5661	172.015	0	2
8.02168	1.5393	0.719409	41.71	165.942	0	2
10.1537	1.91271	0.893931	27.9203	168.144	0	2
9.2735	3.47293	1.62312	24.0313	174.416	0	2
9.08238	1.74142	0.813874	26.4622	185.93	0	2
10.9284	1.90947	0.892417	28.84	178.804	0	2
9.72449	1.68367	0.786886	26.7303	171.768	0	2
8.16694	1.91987	0.897274	24.2638	188.891	0	2
9.8707	1.71195	0.8001	27.8478	176.248	0	2
8.65722	1.74485	0.815476	23.1108	184.68	0	2
7.76177	3.04709	1.4241	20.6648	159.621	0	2
8.71475	1.70614	0.797384	25.0527	176.473	0	2
9.74454	1.85546	0.867174	24.9866	190.104	0	2
7.54391	3.46742	1.62054	21.085	171.814	0	2
6.87647	3.20294	1.49694	19.5529	164.035	0	2
8.14525	1.60335	0.749347	22.581	182.344	0	2
9.71429	1.83077	0.855633	25.7604	183.571	0	2
9.32458	2.52267	1.179	25.1695	201.043	0	2
9.54746	2.12804	0.994564	24.947	200.306	0	2
9.21598	1.83585	0.858009	27.1663	194.933	0	2
9.82262	1.68514	0.787574	24.2173	191.56	0	2
9.38851	1.77931	0.831583	21.6805	189.354	0	2
5.84518	1.80253	0.842434	30.4123	174.476	0	2
8.38704	2.53065	1.18273	27.6673	184.607	0	2
8.57418	1.76923	0.826872	24.1813	203.574	0	2
9.07105	1.80995	0.845902	22.5062	198.96	0	2
9.7995	2.88722	1.34938	24.2331	200.198	0	2
8.53793	2.73793	1.27961	22.7828	198.493	0	2
11.8322	1.70769	0.798112	44.9329	18.6722	0	2
11.3456	2.30381	1.07672	48.7122	5.93784	0	2
10.4497	1.79894	0.840758	44.0622	16.7258	0	2
9.11208	1.86172	0.870097	44.9054	13.7058	0	2
11.7356	2.4023	1.12274	33.1609	42.6358	0	2
13.1156	1.9062	0.890886	33.5662	39.7466	0	2
9.2359	2.29846	1.07422	38.9908	26.2351	0	2
11.3258	2.33286	1.09029	33.6629	54.3426	0	2
9.09941	2.46884	1.15385	34.4021	28.1297	0	2
9.73458	2.23056	1.04248	35.3458	47.4175	0	2
9.05697	3.02947	1.41586	35.6287	45.5359	0	2
10.8973	2.56491	1.19874	31.9615	61.2529	0	2
10.6218	2.2224	1.03867	34.6282	77.6846	0	2
9.42105	2.14286	1.00149	34.1378	74.878	0	2
9.625	2.40278	1.12297	29.3657	70.343	0	2
8.71645	3.29221	1.53866	28.0736	66.8772	0	2
8.97166	2.22672	1.04069	28.3968	74.2182	0	2
8.48876	1.50843	0.704983	44.1854	94.386	0	2
9.52244	2.33752	1.09247	27.8707	84.87	0	2
8.40404	2.59596	1.21325	28.7131	93.8708	0	2
11.1552	1.99118	0.930604	33.9471	99.7539	0	2
11.4737	2.58574	1.20848	34.9711	113.285	0	2
8.07256	1.2571	0.587521	41.6656	99.8935	0	2
8.21622	2.87122	1.3419	25.8283	79.2791	0	2
9.75565	2.24609	1.04974	29.4504	95.8299	0	2
8.71009	1.16147	0.542827	20.7688	104.223	0	2
8.99762	2.05701	0.961368	26.3515	111.879	0	2
8.92585	2.72669	1.27436	30.9004	122.938	0	2
8.66549	1.30634	0.610534	26.9683	113.034	0	2
9.53009	1.74499	0.815541	30.7808	134.633	0	2
10.8632	1.77729	0.83064	32.8297	128.759	0	2
8.37121	2.46212	1.1507	21.5657	114.241	0	2
7.63288	1.54795	0.723452	27.7671	138.133	0	2
10.8163	1.72041	0.804055	54.9694	121.335	0	2
7.37403	3.04416	1.42272	22.9766	113.611	0	2
7.00501	1.65664	0.774253	27.802	136.452	0	2
6.40969	1.99339	0.931637	22.0022	154.068	0	2
7.60753	2.42204	1.13197	23.0323	126.718	0	2
8.25217	2.6913	1.25782	27.2652	134.078	0	2
8.66598	2.58402	1.20767	24.4775	127.095	0	2
7.98056	1.84722	0.863323	25.3056	154.386	0	2
11.4466	3.12481	1.46042	29.3519	160.452	0	2
6.66722	1.87086	0.874371	33.4586	149.127	0	2
6.56582	2.09469	0.978979	35.2794	140.793	0	2
8.37204	1.83412	0.857201	24.1801	169.54	0	2
8.3676	1.66028	0.775952	21.6847	176.882	0	2
7.464	1.56267	0.730332	24.2613	176.427	0	2
8.18894	1.93215	0.903015	20.8069	180.453	0	2
8.53247	1.83333	0.856832	23.8874	179.244	0	2
8.69249	3.88498	1.81569	22.439	163.356	0	2
8.10162	2.07852	0.971424	25.2794	194.528	0	2
7.50284	2.85511	1.33437	20.2699	163.554	0	2
6.87775	1.28362	0.599915	20.4108	192.925	0	2
8.9223	1.51351	0.70736	21.6334	205.099	0	2
8.04103	1.94615	0.90956	19.4128	206.347	0	2
8.81139	1.50295	0.702421	21.5187	205.693	0	2
7.02446	2.05505	0.960452	17.8502	215.106	0	2
12.7851	2.99101	1.39789	46.3966	2.74117	0	2
8.42266	1.05011	0.490782	51.0283	20.8733	0	2
11.3649	2.06186	0.963634	41.0753	28.8038	0	2
10.2836	1.5152	0.708146	39.8495	9.15478	0	2
7.91743	1.81346	0.847542	36.7446	8.71488	0	2
11.1489	2.98999	1.39741	36.2891	27.8323	0	2
9.35006	2.11543	0.988674	43.4241	20.129	0	2
8.72513	1.91795	0.896378	40.8359	17.5257	0	2
12.8922	2.59527	1.21293	31.1761	49.7493	0	2
10.0466	1.89504	0.885673	33.2391	31.6693	0	2
11.3303	3.53917	1.65408	37.9232	37.4216	0	2
8.59124	1.20584	0.563564	44.308	60.5486	0	2
10.2111	3.1771	1.48486	30.6959	52.234	0	2
8.31732	1.05317	0.492214	40.0051	68.4887	0	2
8.15817	1.13203	0.529067	37.8745	75.4256	0	2
7.64979	1.51688	0.708932	26.0211	92.3399	0	2
10.5771	2.61343	1.22142	29.902	74.6546	0	2
8.73968	2.02513	0.946472	27.3519	86.5565	0	2
9.46604	1.79151	0.837285	27.383	100.544	0	2
7.43225	2.74271	1.28184	23.8868	75.1238	0	2
9.0529	1.46599	0.685151	24.8841	105.488	0	2
6.40812	2.23598	1.04501	29.1451	88.7817	0	2
6.46287	2.72277	1.27252	18.3267	100.599	0	2
10.6592	1.83976	0.859834	28.3327	114.374	0	2
6.76401	1.37351	0.641929	36.5229	126.166	0	2
7.64818	3.18738	1.48966	26.9751	97.628	0	2
4.9917	1.79253	0.837762	19.166	122.742	0	2
7.54091	2.58182	1.20665	25.475	142.769	0	2
4.15265	2.02804	0.947829	18.5826	132.145	0	2
7.82178	2.4802	1.15915	21.8193	116.032	0	2
8.63879	2.19929	1.02787	26.573	137.192	0	2
9.48898	1.82565	0.853241	29.4749	145.701	0	2
7.01662	1.50693	0.704281	35.4238	148.58	0	2
7.59466	2.42948	1.13545	22.4117	141.372	0	2
7.71336	3.08795	1.44319	22.2736	128.964	0	2
7.49096	2.16537	1.01202	21.2997	137.896	0	2
6.69526	1.84854	0.863939	37.4562	134.889	0	2
7.82216	2.35277	1.0996	21.9796	160.648	0	2
6.40791	0.91172	0.426104	31.0533	175.302	0	2
7.1185	3.37572	1.57769	19.763	159.991	0	2
8.46488	1.65496	0.773466	23.8326	189.917	0	2
6.5427	1.24793	0.583238	22.4986	184.93	0	2
9.70226	2.0616	0.963516	23.768	201.728	0	2
11.4699	5.04466	2.35769	25.0505	206.478	0	2
10.2348	1.51118	0.70627	33.3642	25.2723	0	2
7.4385	1.10695	0.517348	42.0882	42.2654	0	2
8.59589	2.12329	0.992345	40.1274	29.6112	0	2
12.0572	2.96184	1.38426	37.0366	41.8421	0	2
7.86016	1.36148	0.636304	44.3008	58.6113	0	2
11.5028	2.46168	1.1505	34.1458	49.6772	0	2
10.0429	2.57321	1.20262	31.7125	46.0496	0	2
9.99875	2.72852	1.27521	40.8842	41.2298	0	2
8.32234	1.32741	0.620382	40.2487	72.4806	0	2
11.1912	2.86195	1.33757	29.1947	76.922	0	2
9.22329	2.96172	1.3842	24.0447	68.5756	0	2
5.15	2.16538	1.01202	18.9231	65.8135	0	2
7.59406	1.47772	0.690633	41.1856	90.8971	0	2
9.2782	1.82206	0.851561	23.1679	111.52	0	2
7.7469	1.43921	0.672631	31.8983	115.682	0	2
9.02385	1.93028	0.902139	30.4294	125.933	0	2
7.16667	2.13527	0.997944	21.9976	124.915	0	2
8.27	1.795	0.838916	24.6583	143.815	0	2
6.87138	1.65273	0.772426	30.1704	123.109	0	2
6.83077	2.34188	1.09451	29.9709	146.928	0	2
7.41618	1.54335	0.721305	20.3266	184.139	0	2
7.64781	1.38817	0.648781	18.4447	198.442	0	2
6.60403	1.32383	0.618707	22.8674	206.187	0	2
6.48387	3.5448	1.65671	17.7455	182.272	0	2
9.81287	3.00146	1.40277	41.8787	4.3007	0	2
10.1525	2.69908	1.26145	40.6008	3.34861	0	2
7.58929	0.964286	0.450671	43.051	18.1765	0	2
7.74115	0.99115	0.463227	41.8695	18.8109	0	2
8.04342	2.06863	0.966799	41.0868	10.1887	0	2
6.43056	1.55093	0.724845	38.6281	2.74117	0	2
8.82707	3.08271	1.44074	44.9962	15.3641	0	2
8.11142	2.59285	1.2118	41.5199	17.0543	0	2
8.04459	1.16348	0.543768	35.3079	45.9692	0	2
9.09833	3.19417	1.49283	32.3558	81.1012	0	2
8.58548	1.37939	0.644676	41.4145	80.2861	0	2
8.25507	4.49855	2.10245	22.942	70.8971	0	2
8.40096	1.79233	0.837669	26.1438	98.8722	0	2
7.98654	1.38066	0.645269	31.3097	83.5847	0	2
9.47788	1.88142	0.879304	27.177	100.355	0	2
10.0966	2.45833	1.14893	30.1117	94.5787	0	2
7.39853	1.47188	0.687903	34.0122	106.541	0	2
7.27338	1.15827	0.541334	36.2428	103.521	0	2
7.68952	2.85887	1.33613	29.9073	89.742	0	2
7.30165	2.3595	1.10274	21.2273	112.738	0	2
4.88409	1.51277	0.707012	22.8212	106.589	0	2
9.28407	2.77927	1.29893	21.428	113.463	0	2
9.07721	1.64972	0.771016	25.7759	137.293	0	2
9.43255	2.08137	0.972755	26.848	141.465	0	2
7.67916	2.66745	1.24667	22.9274	139.083	0	2
8.0334	3.27975	1.53283	20.4238	120.827	0	2
8.82957	2.97995	1.39272	22.9474	151.822	0	2
7.58997	2.48083	1.15945	23.4513	170.49	0	2
8.26327	1.57755	0.737289	22.8265	172.554	0	2
9.76535	3.69956	1.72904	28.0504	177.834	0	2
8.82851	1.97107	0.921207	21.5021	196.819	0	2
7.5997	3.3006	1.54258	22.432	168.596	0	2
8.33716	2.25688	1.05478	20.9862	202.643	0	2
9.83961	2.62002	1.2245	37.7341	11.22	0	2
7.76744	2.40116	1.12221	23.7791	51.1788	0	2
6.72169	7.62646	3.56432	41.6466	57.6779	0	2
7.84601	1.67029	0.780631	25.6232	94.0178	0	2
8.19068	6.27648	2.93339	41.4587	78.7524	0	2
8.25086	3.36018	1.57042	32.1404	94.8332	0	2
8.48027	3.67238	1.71634	34.6775	80.9664	0	2
7.97826	1.48641	0.694694	32.5109	96.6581	0	2
8.33731	1.43582	0.671049	33.403	102.376	0	2
7.61694	1.46225	0.6834	43.3573	120.049	0	2
6.5638	1.58457	0.740569	25.8131	126.277	0	2
6.48168	1.77487	0.829508	36.377	169.751	0	2
7.62408	1.83538	0.857789	21.6634	173.66	0	2
7.58862	1.77462	0.82939	21.0635	175.068	0	2
7.16718	1.78328	0.833439	18.0619	161.512	0	2
7.45918	1.76276	0.823846	19.9209	183.035	0	2
7.42205	2.47529	1.15686	30.1407	176.442	0	2
5.29268	1.73519	0.810964	20.7143	174.088	0	2
8.57645	3.63913	1.70079	35.7521	14.7616	0	2
6.26045	2.17363	1.01588	41.3408	11.3021	0	2
8.50692	6.48538	3.03103	47.4208	12.776	0	2
6.55932	3.35593	1.56844	29.9939	92.1519	0	2
6.23684	3.6416	1.70195	29.0727	90.3562	0	2
8.47865	1.838	0.859011	28.6848	119.594	0	2
9.56419	1.48311	0.693149	27.6892	121.495	0	2
8.70355	2.20709	1.03151	27.1702	131.367	0	2
9.15771	2.61022	1.21992	33.0143	132.082	0	2
7.48193	2.31325	1.08113	19.6024	155.325	0	2
8.30469	2.22917	1.04183	20.8802	148.421	0	2
6.82749	2.66307	1.24462	24.0943	135.713	0	2
6.18182	2.60188	1.21602	24.442	139.645	0	2
5.79002	4.50312	2.10459	23.2765	137.7	0	2
7.30851	2.53546	1.18498	23.5461	159.708	0	2
7.7474	2.13495	0.997795	30.7474	164.472	0	2
6.58621	3.45141	1.61306	27.9279	148.249	0	2
7.4787	2.44016	1.14044	21.0304	185.623	0	2
8.45581	1.52326	0.711913	21.1419	178.366	0	2
13.2813	3.85237	1.80045	43.6546	43.4801	0	2
6.82342	2.38848	1.11628	38.8104	14.6792	0	2
9.67934	3.62975	1.69641	44.5091	48.28	0	2
14.3734	4.93473	2.30631	46.752	50.7523	0	2
10.0522	3.13134	1.46347	29.8134	53.7695	0	2
10.5456	3.8403	1.79481	31.4316	56.4902	0	2
7.61186	4.11036	1.92103	34.0308	61.7453	0	2
7.3766	1.77447	0.82932	25.2979	129.039	0	2
6.27879	1.09394	0.511266	35.997	132.95	0	2
7.03683	1.56374	0.730833	24.1048	140.651	0	2
4.98905	1.45985	0.682281	17.4124	129.586	0	2
9.34902	1.92157	0.89807	28.1608	172.949	0	2
7.83369	2.26226	1.0573	21.4478	179.525	0	2
7.86278	1.95677	0.91452	20.6523	189.993	0	2
8.70413	2.70642	1.26488	23.6261	193.011	0	2
6.55325	1.37662	0.643382	16.9766	188.934	0	2
8.12987	2.46753	1.15323	22.4416	203.352	0	2
7.30314	2.27526	1.06337	21.5889	173.849	0	2
8.87415	2.26531	1.05872	23.2517	205.9	0	2
6.79417	3.54295	1.65584	29.0162	117.244	0	2
7.4357	1.63255	0.762991	21.4409	174.16	0	2
7.21503	2.45804	1.1488	27.5647	161.973	0	2
7.21343	2.67386	1.24966	21.1703	177.302	0	2
8.10173	1.49784	0.700032	23.2229	177.962	0	2
7.53319	1.96903	0.92025	20.8673	194.088	0	2
7.45495	2.07033	0.967595	20.2549	200.907	0	2
8.1267	2.41403	1.12823	21.0407	203.66	0	2
7.87246	2.01159	0.940144	20.1681	215.776	0	2
16.4883	1.78711	1.14317	47.0918	137.305	1	3
77.0686	6.28381	4.01959	25.9295	70.4063	1	3
112.399	89.6034	57.3169	36.1034	36.3434	1	3
119.499	5.55236	3.55169	38.5637	91.5358	1	3
206.323	32.5696	20.8339	34.784	83.5501	1	3
181.655	38.6645	24.7327	33.8736	72.8338	1	3
108.472	28.6159	18.3048	31.1987	74.81	1	3
115.267	30.1299	19.2733	38.3573	65.9924	1	3
167.287	37.7011	24.1164	38.4583	59.9413	1	3
104.86	12.5336	8.01742	78.0072	62.5831	1	3
99.9488	50.0277	32.0014	40.7604	53.0106	1	3
92.2786	43.6267	27.9068	52.5738	58.48	1	3
133.984	67.6679	43.2854	45.5582	37.5573	1	3
128.565	3.31579	2.12102	44.839	53.72	1	3
40.0982	1.66258	1.06351	42.5164	102.773	1	3
147.295	5.94262	3.80134	21.1393	98.2429	1	3
165.831	16.1672	10.3417	45.0206	68.8859	1	3
120.364	28.8872	18.4784	47.6047	52.78	1	3
115.035	60.665	38.8058	22.8007	11.256	1	3
176.942	8.65333	5.53531	29.74	114.05	1	3
129.9	8.60499	5.50439	24.8399	98.6094	1	3
23.8022	1.34066	0.857584	35.1936	65.4003	1	3
107.749	30.7374	19.6619	43.7633	73.5037	1	3
196.665	50.2962	32.1731	58.7577	69.02	1	3
113.247	60.4913	38.6947	54.7784	37.8806	1	3
75.1905	18.8386	12.0505	48.6473	77.5506	1	3
209.297	34.3897	21.9982	63.5403	79.9007	1	3
156.395	29.2463	18.7081	48.1044	77.0481	1	3
112.426	33.7193	21.5693	55.2783	58.39	1	3
95.0691	32.932	21.0658	40.9706	64.908	1	3
104.937	29.5358	18.8932	51.6085	47.6995	1	3
130.334	21.1616	13.5365	40.6409	201.625	1	3
195.505	25.6149	16.3852	43.5417	74.2704	1	3
94.7887	25.8062	16.5075	39.2167	81.5206	1	3
171.818	53.762	34.3901	39.3556	48.0496	1	3
217.446	37.0306	23.6875	47.6378	65.96	1	3
175.824	49.9035	31.922	44.1521	55.8636	1	3
129.095	36.0924	23.0874	46.0552	59.7162	1	3
32.7185	2.55067	1.63159	49.9007	36.9491	1	3
48.7885	5.33883	3.41511	42.554	13.2295	1	3
29.1756	1.26475	0.809025	40.5665	105.387	1	3
49.9624	1.63059	1.04304	42.3671	93.5154	1	3
31.0259	1.20122	0.768388	32.5991	85.9097	1	3
118.78	50.2915	32.1702	49.0873	86.4864	1	3
171.854	57.417	36.7281	38.2533	58.4928	1	3
114.752	28.9279	18.5044	40.7836	72.4208	1	3
113.985	37.4143	23.9329	53.4938	60.0868	1	3
149.02	31.4069	20.0902	39.33	88.5888	1	3
47.9932	2.28202	1.45975	41.6744	66.6756	1	3
168.442	44.8954	28.7184	47.9851	63.9345	1	3
158.552	39.7514	25.4279	53.4823	72.0832	1	3
17.4406	2.13086	1.36306	49.711	44.2601	1	3
187.036	77.0503	49.2871	71.9554	38.4967	1	3
42.6853	1.9687	1.25932	32.9325	196.148	1	3
124.072	19.4728	12.4563	34.4132	188.731	1	3
17.3658	1.25168	0.800665	30.1141	68.1197	1	3
157.396	55.9129	35.766	51.6116	81.7769	1	3
62.8918	1.34364	0.859493	41.4553	59.32	1	3
30.6701	2.57265	1.64566	52.9709	56.1741	1	3
194.335	78.1028	49.9603	65.5931	26.557	1	3
30.6365	2.00164	1.2804	37.7188	75.4187	1	3
47.4119	2.02881	1.29778	46.5932	79.592	1	3
53.4777	1.70446	1.0903	56.4573	78.2	1	3
183.222	49.3982	31.5987	50.7376	61.1282	1	3
42.4614	2.32463	1.487	43.2488	54.9213	1	3
50.814	1.90821	1.22063	81.9517	22.2564	1	3
8.16238	1.55627	0.995505	38.4598	197.513	0	3
9.70588	1.24064	0.793606	72.3021	205.135	0	3
8.54883	2.18432	1.39725	57.6919	184.628	0	3
10.0038	1.79565	1.14863	39.1514	208.347	0	3
8.85602	1.9073	1.22005	45.8205	190.415	0	3
7.78617	1.1865	0.75897	49.5466	209.511	0	3
8.22466	1.17718	0.75301	63.0085	191.132	0	3
10.1054	1.87651	1.20035	76.0015	171.277	0	3
6.73045	1.16872	0.747602	52.4835	152.73	0	3
9.5008	1.92456	1.23109	43.1862	170.768	0	3
5.98571	0.954762	0.610736	63.75	142.898	0	3
9.20122	1.43064	0.915143	50.2317	156.555	0	3
9.39905	2.20347	1.4095	49.2256	160.231	0	3
8.41634	1.55642	0.995601	75.5914	122.521	0	3
7.7445	1.32657	0.848569	46.6785	129.436	0	3
7.40313	1.24853	0.798653	48.2622	131.069	0	3
9.77214	2.02052	1.29247	58.5745	138.755	0	3
7.57398	1.17967	0.754607	87.6252	112.827	0	3
10.1471	1.45853	0.932982	51.9734	138.627	0	3
9.57817	2.55412	1.6338	70.7576	110.995	0	3
8.14695	1.27069	0.812826	50.7889	124.962	0	3
6.13225	0.969838	0.620379	54.0557	109.542	0	3
7.31564	1.01955	0.652181	31.1034	106.491	0	3
7.16287	0.976371	0.624559	66.3435	125.257	0	3
7.38636	1.34903	0.862936	52.2938	99.5527	0	3
7.46163	2.0743	1.32687	59.6663	94.9982	0	3
6.92018	1.44124	0.921924	52.4922	127.826	0	3
7.7961	2.02249	1.29373	50.3043	93.8677	0	3
8.42175	2.18466	1.39747	70.7793	84.8809	0	3
6.42532	1.21013	0.774086	55.562	99.4801	0	3
9.83482	1.37247	0.877932	65.413	111.861	0	3
6.12526	1.03549	0.662376	68.1461	95.1642	0	3
7.46768	1.37072	0.876815	53.0894	100.755	0	3
7.2027	1.65165	1.05652	49.6381	84.1182	0	3
7.82024	1.48187	0.947915	42.6012	76.5483	0	3
8.51179	1.62854	1.04173	53.8561	74.1621	0	3
5.65298	1.27515	0.815682	45.8727	33.3495	0	3
7.94238	1.69508	1.0843	54.1176	58.386	0	3
6.77222	0.939925	0.601245	80.2816	55.1094	0	3
10.1966	1.36724	0.874588	33.3172	185.651	0	3
8.61725	1.40162	0.896577	60.2372	215.628	0	3
8.69828	2.17861	1.3936	61.9102	181.938	0	3
8.33243	1.32425	0.847088	28.3134	187.523	0	3
9.22185	2.39956	1.53493	56.3609	182.327	0	3
10.4373	2	1.27935	46.3191	184.073	0	3
9.96246	1.89189	1.21019	37.8003	205.727	0	3
11.9316	2.16603	1.38555	51.7795	194.147	0	3
10.3953	1.28372	0.821162	37.3008	199.904	0	3
8.00139	1.18333	0.756947	45.9333	196.004	0	3
10.1518	2.72701	1.74439	51.9635	182.145	0	3
9.56459	2.38752	1.52723	53.2293	184.136	0	3
8.59704	2.40424	1.53793	50.3721	171.168	0	3
9.83148	1.34261	0.85883	30.7886	180.979	0	3
10.9934	2.06887	1.3234	43.5272	204.906	0	3
9.96078	1.67647	1.07239	33.8644	202.261	0	3
9.399	1.72454	1.10314	37.3289	197.683	0	3
8.14583	1.22049	0.780713	69.7552	173.317	0	3
7.66951	1.38623	0.886734	70.2544	167.744	0	3
8.70753	1.72855	1.10571	44.8757	177.351	0	3
7.88168	1.1931	0.763193	47.1816	191.287	0	3
9.80466	1.6799	1.07459	38.9723	197.905	0	3
10.6069	2.09861	1.34243	50.4944	186.359	0	3
9.58058	2.34917	1.5027	48.4959	193.133	0	3
9.22957	1.83774	1.17555	63.7212	161.822	0	3
9.20217	2.17554	1.39164	46.6223	178.513	0	3
9.8402	1.94472	1.24399	52.4452	167.417	0	3
10.5315	2.05991	1.31767	43.3886	187.698	0	3
9.47185	2.14901	1.37466	54.0265	159.91	0	3
9.37311	2.05487	1.31445	58.1344	167.729	0	3
9.09091	1.10428	0.706377	31.6684	158.763	0	3
8.81515	2.87715	1.84044	63.8611	152.867	0	3
9.98514	2.44865	1.56634	50.3851	179.335	0	3
11.0366	1.80992	1.15776	50.1476	182.66	0	3
9.88077	2.18462	1.39744	57.3423	158.275	0	3
10.179	1.50078	0.960012	48.9246	172.614	0	3
8.32636	1.5659	1.00166	71.8891	165.739	0	3
6.63194	0.822917	0.526398	61.3872	153.653	0	3
9.33509	1.86412	1.19243	53.9842	155.766	0	3
9.93522	2.25304	1.44121	48.0729	171.866	0	3
9.36674	1.82574	1.16788	51.5843	163.755	0	3
8.64846	1.68409	1.07726	95.0618	141.64	0	3
8.04032	2.18548	1.398	58.0415	139.341	0	3
9.67647	1.70205	1.08875	50.766	163.507	0	3
6.15459	1.47343	0.942514	45.9541	138.124	0	3
7.96457	1.08005	0.690881	82.5774	156.67	0	3
8.28963	1.6936	1.08335	50.6753	133.559	0	3
8.81977	1.70155	1.08844	50.5039	141.703	0	3
8.96738	1.87064	1.1966	55.3971	143.387	0	3
8.8369	1.78452	1.14151	54.3738	147.116	0	3
8.90192	1.75693	1.12386	46.0661	160.993	0	3
7.75269	1.43728	0.919387	50.8996	127.577	0	3
8.62517	1.83447	1.17346	49.0109	146.46	0	3
8.96556	1.61993	1.03622	50.7355	148.376	0	3
7.61996	2.05942	1.31735	58.6558	121.369	0	3
7.74816	1.66317	1.06389	63.9224	118.125	0	3
7.83642	1.09336	0.699396	83.2076	134.656	0	3
9.86974	1.72144	1.10116	47.4389	148.04	0	3
7.32971	1.53804	0.983846	44.7464	135.206	0	3
6.88479	1.08525	0.694208	82.076	112.786	0	3
7.50174	1.80997	1.15779	56.5817	106.108	0	3
8.74079	1.4587	0.933094	41.2122	139.434	0	3
7.98896	0.825607	0.528119	39.6468	109.857	0	3
8.57615	1.62574	1.03994	59.0059	132.227	0	3
8.58343	1.58284	1.0125	53.0609	127.732	0	3
7.67944	1.32056	0.84473	50.9415	107.715	0	3
9.7196	0.967096	0.618626	43.5279	92.3599	0	3
8.00789	1.80609	1.15531	54.08	117.553	0	3
8.45981	1.09456	0.700163	73.344	124.44	0	3
8.89704	1.6982	1.08629	57.2014	112.589	0	3
8.10828	1.6359	1.04644	50.3815	102.128	0	3
9.49676	1.80674	1.15573	51.5927	120.36	0	3
7.82912	1.91976	1.22802	63.5542	115.089	0	3
5.65867	0.726937	0.465003	54.786	91.3867	0	3
7.71429	1.5082	0.964753	52.2998	84.9674	0	3
10.7938	1.48723	0.95134	52.7048	110.168	0	3
9.50249	1.69327	1.08314	58.6683	114.371	0	3
8.35821	1.78645	1.14275	53.5098	105.414	0	3
6.7963	1.28472	0.821803	51.3148	109.055	0	3
7.34955	2.02602	1.29599	63.6324	76.1213	0	3
7.80488	1.57259	1.00594	56.5772	81.0292	0	3
8.14634	1.26016	0.806093	69.2683	108.46	0	3
7.8527	1.02647	0.656604	88.313	101.488	0	3
6.28794	0.916342	0.58616	76.9358	68.1935	0	3
8.21278	1.21873	0.779591	54.8132	92.658	0	3
8.63878	2.03802	1.30367	66.8555	87.2873	0	3
8.02934	1.82763	1.16909	63.1112	72.3849	0	3
7.28945	1.41797	0.90704	67.001	64.2888	0	3
7.2916	1.09695	0.701688	60.871	82.5745	0	3
7.91424	1.26187	0.807184	51.0949	93.634	0	3
7.40339	1.11989	0.716362	85.6714	89.1507	0	3
8.31717	1.40404	0.898127	55.5818	90.7214	0	3
7.24801	1.25278	0.801372	52.0556	80.376	0	3
7.35656	1.47614	0.944246	61.9841	60.1377	0	3
6.98468	1.34136	0.85803	70.6521	65.4568	0	3
6.93293	1.11585	0.713782	54.6626	88.2809	0	3
8.7131	1.6469	1.05348	64.2469	71.4178	0	3
8.81698	1.78113	1.13934	78.217	79.2842	0	3
7.07007	0.993878	0.635757	71.1605	56.2101	0	3
7.15407	1.12553	0.719975	47.301	81.2344	0	3
8.78357	1.47194	0.941563	66.8888	58.6931	0	3
10.2225	1.48463	0.949676	58.0293	68.6909	0	3
6.19038	0.749499	0.479435	74.7675	48.5141	0	3
7.48507	1.42842	0.913725	58.5973	42.3624	0	3
8.32024	1.54985	0.991397	45.9184	70.4752	0	3
8.86643	1.58845	1.01609	62.9278	66.2799	0	3
8.16865	1.30998	0.837957	57.9929	68.1935	0	3
7.63755	1.38353	0.88501	62.9629	39.3725	0	3
8.43186	1.38752	0.88756	55.9918	51.0102	0	3
8.10991	1.36997	0.876333	58.178	45.3578	0	3
8.15716	1.31125	0.838771	92.6456	35.0744	0	3
8.22675	1.26541	0.809451	61.1797	45.546	0	3
8.63404	0.991101	0.633981	47.5973	20.4113	0	3
8.01691	1.12051	0.716759	60.0592	43.52	0	3
7.04556	0.995204	0.636606	78.0144	34.5815	0	3
6.6918	0.900794	0.576214	74.5225	29.0615	0	3
8.02799	1.22392	0.782908	54.3003	27.2	0	3
7.01913	1.04348	0.667485	45.0522	23.1824	0	3
7.32998	1.15694	0.740065	73.8873	189.292	0	3
9.08901	1.24084	0.793731	49.8665	213.482	0	3
9.61059	2.0405	1.30525	43.4237	189.654	0	3
10.2892	2.08995	1.33688	53.9541	190.342	0	3
11.6575	2.44923	1.5667	54.1635	180.335	0	3
8.34498	2.17475	1.39113	49.7475	175.183	0	3
9.08523	1.58266	1.01239	37.6018	183.532	0	3
6.96264	1.11351	0.71228	108.261	168.717	0	3
8.85106	1.04255	0.666894	27.2219	165.063	0	3
7.39644	1.24142	0.794105	90.0584	154.831	0	3
9.12319	1.9087	1.22094	46.1913	182.702	0	3
8.19817	1.3689	0.875651	47.7271	153.25	0	3
8.8236	1.63785	1.04769	47.9077	166.609	0	3
9.65839	1.4736	0.942624	40.9255	171.705	0	3
8.63298	1.52149	0.973255	46.6736	151.749	0	3
9.23011	1.68639	1.07874	39.4622	167.92	0	3
8.94788	2.0684	1.3231	66.5309	132.139	0	3
9.18527	1.9275	1.23297	55.1473	154.485	0	3
8.53015	2.20603	1.41114	65.8266	122.155	0	3
10.5601	1.59719	1.02168	57.0614	137.224	0	3
7.76854	1.33166	0.85183	56.4289	99.0661	0	3
9.71293	1.63701	1.04715	56.7177	123.197	0	3
8.26935	1.43584	0.918471	62.7444	112.688	0	3
10.5525	0.861345	0.550979	40.2878	91.5667	0	3
8.18683	1.98253	1.26817	50.746	104.652	0	3
8.34122	1.61824	1.03515	85.2128	114.709	0	3
6.18476	0.921905	0.589718	81.9371	80.7978	0	3
8.23236	1.38929	0.888695	57.9246	94.386	0	3
7.37173	1.20419	0.770287	59.0227	104.643	0	3
5.72885	0.637744	0.407948	71.3189	81.3055	0	3
8.87028	1.45873	0.933109	54.1132	102.681	0	3
8.67834	1.3259	0.848145	57.6401	95.5835	0	3
8.35576	1.4842	0.949403	71.0765	71.8229	0	3
7.80228	1.37888	0.882034	68.3364	52.9615	0	3
7.68874	1.19928	0.767146	59.7489	74.1948	0	3
10.409	1.50047	0.959809	60.9505	78.9503	0	3
6.91298	0.958702	0.613256	58.1903	64.1952	0	3
7.11698	1.46791	0.938982	56.5373	33.4827	0	3
6.97311	0.931092	0.595595	104.486	44.514	0	3
8.18095	1.30595	0.835383	62.731	63.0899	0	3
8.07067	1.1649	0.745156	56.3251	50.1197	0	3
6.80197	1.39079	0.889651	63.1099	26.5309	0	3
8.28684	1.65183	1.05663	64.6835	29.9548	0	3
7.87507	1.29248	0.826766	68.3025	29.1092	0	3
7.55246	1.08689	0.695252	53.2164	24.0825	0	3
7.22717	1.67391	1.07076	44.0609	13.6551	0	3
8.26707	1.99848	1.27838	43.8665	187.477	0	3
7.51829	1.51016	0.966011	55.3882	189.685	0	3
9.54501	2.6618	1.70268	57.9343	182.121	0	3
11.1622	2.15505	1.37853	43.9701	195.6	0	3
8.24561	1.38889	0.888435	41.9079	174.706	0	3
9.44737	1.97697	1.26462	37.4984	202.222	0	3
9.70597	1.41343	0.904136	34.5985	199.4	0	3
7.31234	1.0806	0.691234	81.3577	165.141	0	3
9.82303	1.89747	1.21376	42.3666	193.198	0	3
9.66347	2.49341	1.59497	49.3641	179.863	0	3
9.29401	1.46655	0.938113	43.7958	181.872	0	3
7.06404	0.753933	0.482271	77.0539	158.398	0	3
6.66013	0.876906	0.560934	83.8017	146.034	0	3
7.39203	0.979036	0.626263	75.3585	147.198	0	3
7.46958	0.868821	0.555762	67.9278	172.259	0	3
7.61879	1.10993	0.709992	39.2624	172.916	0	3
7.15367	1.21492	0.777153	84.4688	141.116	0	3
7.24519	1.19471	0.764225	91.3966	129.777	0	3
8.10874	1.89659	1.2132	66.9744	125.324	0	3
8.9479	1.59319	1.01912	60.003	134.842	0	3
9.41129	1.72926	1.10616	52.1993	153.63	0	3
8.19014	1.23005	0.786828	49.0235	140.701	0	3
9.53224	1.56192	0.999122	56	146.739	0	3
9.32298	1.78509	1.14188	51.882	144.295	0	3
9.27692	1.70308	1.08941	61.2138	138.307	0	3
7.54925	0.985075	0.630126	54.0224	122.424	0	3
7.16276	1.4359	0.918506	85.175	108.334	0	3
8.00287	1.40401	0.898109	50.563	115.96	0	3
7.20632	1.14476	0.732272	56.5308	119.189	0	3
6.47609	0.913043	0.58405	79.6043	101.757	0	3
8.71391	1.021	0.653105	54.7717	117.603	0	3
8.26282	1.41987	0.908254	51.36	124.359	0	3
7.88571	1.19643	0.765324	56.0988	89.3217	0	3
8.0953	1.01243	0.647625	54.7652	97.9224	0	3
8.68684	1.59737	1.02179	68.5816	115.756	0	3
9.47126	0.909962	0.582078	42.7854	83.51	0	3
8.03784	1.28108	0.819474	54.9797	110.045	0	3
7.46231	1.07705	0.688962	65.191	87.0168	0	3
6.72785	0.855696	0.547366	98.5544	78.6459	0	3
8.26179	1.25825	0.804872	65.4741	69.1505	0	3
7.73812	1.33851	0.856207	67.6198	51.2769	0	3
7.50916	1.81319	1.15985	71.5018	52.1487	0	3
7.87533	1.14867	0.734772	66.118	60.8591	0	3
8.14099	1.17925	0.754338	69.1994	54.7822	0	3
8.76591	1.43366	0.917072	69.7066	63.8802	0	3
6.83613	0.993697	0.635642	76.4958	45.3617	0	3
7.50902	1.40979	0.901808	61.1237	40.7731	0	3
9.15435	1.31363	0.840294	65.7438	48.6663	0	3
7.66235	1.73412	1.10927	52.6047	16.6322	0	3
8.44403	1.22386	0.782872	61.9397	34.7067	0	3
7.35878	1.0687	0.683621	55.5916	30.26	0	3
9.69265	1.31514	0.841263	58.8541	29.24	0	3
8.67189	1.0792	0.690335	62.1375	26.8105	0	3
7.39062	0.8125	0.519735	54.1406	26.18	0	3
7.37298	0.853157	0.545742	44.0206	16.7431	0	3
7.63533	1.17667	0.752685	39.8935	2.38	0	3
10.5267	1.47475	0.943357	37.8903	204.476	0	3
9.55581	1.97351	1.2624	37.646	220.842	0	3
9.04403	1.44182	0.922297	36.8097	189.852	0	3
8.94719	1.42365	0.910672	40.6131	196.326	0	3
8.6315	2.39884	1.53448	54.3309	174.839	0	3
8.6722	1.06639	0.682141	29.5851	164.762	0	3
8.77722	1.7209	1.10081	41.7059	190.221	0	3
8.92879	1.40758	0.900389	43.8152	172.685	0	3
7.80147	1.53676	0.983028	46.6118	158.299	0	3
8.90082	1.63011	1.04273	49.2695	165.823	0	3
7.07159	0.966443	0.618208	82.0984	155.392	0	3
9.35357	1.42792	0.913403	38.1017	175.22	0	3
7.81017	1.10339	0.705809	65.1712	145.234	0	3
8.89199	1.83449	1.17348	45.8554	160.762	0	3
6.95385	1.18974	0.761047	50.6205	136.598	0	3
8.06663	1.24489	0.796321	52.768	151.959	0	3
8.55912	1.73647	1.11078	76.2786	132.197	0	3
7.57306	0.855146	0.547014	45.1182	121.429	0	3
8.70395	1.19209	0.762549	47.5605	147.805	0	3
6.0038	0.639469	0.409051	54.4345	144.846	0	3
8.66517	1.58595	1.01449	70.6921	112.914	0	3
6.90982	0.859719	0.54994	81.5611	130.302	0	3
6.91061	1.27121	0.813161	51.7197	112.683	0	3
8.72214	1.24542	0.79666	49.031	132.471	0	3
5.95033	0.834437	0.533767	76.7517	93.2815	0	3
8.96973	1.22129	0.78123	48.8309	125.902	0	3
8.8313	1.53718	0.983294	58.677	111.688	0	3
7.77118	1.55369	0.993856	73.005	75.14	0	3
8.57797	1.55446	0.994344	69.8849	99.5892	0	3
6.25553	0.810865	0.518689	83.1147	80.8171	0	3
7.73256	1.38478	0.885806	65.0317	73.3652	0	3
8.35318	1.25975	0.805831	56.1191	100.088	0	3
10.1911	1.52216	0.973686	65.8615	92.4212	0	3
5.99763	0.691943	0.442618	88.5213	76.2965	0	3
7.91655	1.31989	0.844298	64.5994	65.0183	0	3
8.10488	1.3053	0.834963	60.055	83.1222	0	3
7.85124	1.39669	0.893428	62.4545	68.6177	0	3
7.91047	1.45239	0.929057	70.6845	46.2625	0	3
8.50328	1.27948	0.818447	58.3624	71.4655	0	3
7.47436	0.782051	0.500257	47.5427	36.8614	0	3
6.95099	0.829139	0.530378	49.3934	60.8553	0	3
8.73226	1.36129	0.870781	63.8914	62.1466	0	3
8.85414	0.993985	0.635826	51.6	64.26	0	3
7.73515	1.15106	0.736301	82.4451	36.8033	0	3
8.68762	1.35783	0.86857	72.5435	52.2782	0	3
8.62199	1.12481	0.71951	62.4941	52.8129	0	3
10.1081	2.00505	1.28258	64.4576	51	0	3
8.09568	1.55893	0.997204	75.0152	36.7735	0	3
8.24706	1.06397	0.680594	60.5132	41.3083	0	3
9.93581	1.40942	0.901565	72.0699	39.78	0	3
7.12766	1.10966	0.709818	70.0393	32.9397	0	3
7.54936	1.25229	0.801054	56.6508	17.0543	0	3
8.82481	1.00155	0.640665	58.5612	18.1351	0	3
8.19914	1.17761	0.753286	63.3692	28.0082	0	3
7.00414	0.886818	0.567274	79.7012	16.4118	0	3
5.76432	0.791667	0.506408	61.7917	5.48234	0	3
9.1511	1.2298	0.786671	61.1007	19.6201	0	3
8.1476	1.3238	0.846799	45.7037	3.8766	0	3
7.3477	0.926724	0.592801	53.4066	4.42	0	3
8.9	1.87258	1.19784	34.421	214.291	0	3
9.87015	3.34951	2.1426	56.8058	191.769	0	3
7.53968	0.955556	0.611244	54.3397	214.665	0	3
9.01069	1.56641	1.00199	42.3817	183.405	0	3
8.89655	1.72669	1.10452	43.5849	186.44	0	3
7.90926	1.20605	0.771478	44.5803	179.471	0	3
7.11506	0.948592	0.606789	70.1701	178.366	0	3
8.19693	1.64066	1.04949	46.9373	163.56	0	3
7.87406	1.19395	0.763741	43.9673	190.711	0	3
7.01506	0.834337	0.533703	68.8795	157.843	0	3
8.48414	1.58989	1.01701	38.141	167.717	0	3
8.45455	1.95251	1.24897	53.5834	148.709	0	3
11.4733	1.94947	1.24702	48.2071	177.649	0	3
7.25355	0.963489	0.616318	41.2535	170.518	0	3
8.79464	1.46939	0.939928	52.0804	141.977	0	3
6.8425	1.01	0.64607	76.1525	146.407	0	3
8.35918	1.77879	1.13785	50.2623	143.924	0	3
7.71207	1.44427	0.923863	56.0495	126.546	0	3
6.00347	1.07626	0.688453	61.5009	117.659	0	3
8.85639	1.50066	0.959932	53.3333	133.872	0	3
7.90662	1.08983	0.697138	52.565	118.77	0	3
5.95833	0.703125	0.44977	81.6875	99.7841	0	3
7.57045	0.948016	0.606421	46.2695	119.373	0	3
8.15292	1.17391	0.750921	50.2039	114.489	0	3
8.02369	1.36663	0.874198	60.7909	92.9948	0	3
8.28281	1.36312	0.871953	58.5498	103.867	0	3
6.1368	0.77842	0.497935	84.9538	84.7385	0	3
7.67358	1.16595	0.74583	53.0574	95.368	0	3
7.70722	1.54246	0.98667	56.8023	103.823	0	3
6.54173	1.0315	0.659821	54.4189	72.3497	0	3
7.43525	0.888489	0.568343	48.3345	95.7581	0	3
7.94572	1.41441	0.904757	70.4426	58.0365	0	3
8.30435	1.11516	0.713337	55.6545	81.6	0	3
6.73634	0.750594	0.480135	88.3017	63.3259	0	3
7.40524	1.18117	0.755562	61.4613	48.2093	0	3
8.92217	1.69897	1.08679	66.6446	74.4173	0	3
7.82157	1.28113	0.819505	77.0308	62.0255	0	3
7.4004	0.866867	0.554512	66.4454	37.4247	0	3
8.19171	1.48748	0.951499	72.1204	43.6526	0	3
8.52587	1.21072	0.774468	65.0875	52.9462	0	3
7.29606	1.02016	0.652572	68.1311	17.5026	0	3
7.43923	1.0373	0.663536	69.4103	41.6205	0	3
8.18778	1.38348	0.884978	79.9491	24.8014	0	3
10.5741	1.59838	1.02244	72.5553	44.54	0	3
8.13978	0.991398	0.634171	52.1247	12.1642	0	3
8.18721	1.15814	0.740831	58.3791	35.02	0	3
8.52363	0.779055	0.498341	75.0204	24.2356	0	3
7.86966	1.23504	0.790024	65.4434	26.3911	0	3
7.02405	1.3338	0.8532	57.9816	16.6739	0	3
7.65296	0.954111	0.610319	59.2314	21.3524	0	3
6.43638	1.1409	0.729806	47.9353	3.04105	0	3
6.07235	0.691214	0.442152	41.3618	10.7517	0	3
7.87911	1.03638	0.662948	57.6749	14.0186	0	3
7.79079	1.00921	0.645565	49.2211	2.04	0	3
9.01894	2.12626	1.36011	41.8725	197.905	0	3
7.49265	1.21691	0.778426	51.2978	214.301	0	3
8.12994	1.73517	1.10994	43.3284	180.276	0	3
8.33047	1.04506	0.6685	40.0901	203.361	0	3
10.2999	2.00354	1.28161	38.4262	201.161	0	3
7.98246	1.46345	0.93613	40.3889	171.127	0	3
9.57143	1.4	0.895543	33.4778	197.262	0	3
6.34228	0.853691	0.546084	84.2993	159.778	0	3
7.36791	0.834025	0.533504	74.4066	171.315	0	3
7.79054	1.26182	0.807156	36.8108	175.256	0	3
7.6156	1.31616	0.84191	41.3245	157.227	0	3
7.36306	2.14271	1.37063	52.0672	139.781	0	3
8.65996	1.41387	0.904415	43.8937	164.176	0	3
7.76114	2.06559	1.32131	54.6238	139.694	0	3
7.03085	0.958869	0.613363	77.6504	142.996	0	3
9.27946	1.4072	0.900147	42.8158	157.529	0	3
8.0437	1.29434	0.827958	52.1799	125.837	0	3
8.93041	1.28744	0.823543	42.8941	156.631	0	3
7.68579	1.06148	0.678998	43.6803	135.632	0	3
6.70101	0.745455	0.476848	28.3091	132.115	0	3
8.61064	1.7381	1.11181	62.4258	127.587	0	3
8.65551	1.25591	0.803369	56.628	135.625	0	3
7.40629	1.38532	0.886153	49.6828	113.932	0	3
7.78579	1.40437	0.898339	53.3257	105.515	0	3
5.97446	0.940144	0.601385	56.0311	94.2119	0	3
7.27662	1.33905	0.856552	53.8305	94.4796	0	3
7.91941	1.31669	0.842249	54.6459	87.8681	0	3
7.55068	1.01239	0.647597	58.2534	108.217	0	3
7.58352	1.17048	0.748725	72.27	94.6208	0	3
8.42641	1.37689	0.880761	57.132	100.948	0	3
7.94677	1.46008	0.933972	60.8859	86.8678	0	3
7.57908	1.30867	0.837124	59.4375	65.3977	0	3
7.50644	1.12446	0.71929	42.4478	96.22	0	3
6.30176	1.00881	0.645309	73.4009	75.0669	0	3
7.4486	1.07243	0.686005	57.1799	77.8073	0	3
6.70996	0.909253	0.581625	65.5498	69.3467	0	3
8.23386	1.20635	0.77167	49.0868	70.6161	0	3
8.18542	0.870833	0.557049	71.9417	36.2144	0	3
8.32091	1.10697	0.7081	63.494	60.9397	0	3
8.52851	1.48136	0.947586	77.1404	47.1241	0	3
8.3187	1.38385	0.885214	70.2649	37.7017	0	3
8.13368	1.15337	0.737779	59.3917	9.91262	0	3
7.70562	0.824275	0.527267	67.7509	28.95	0	3
6.09218	0.57515	0.367908	62.986	12.7443	0	3
8.94047	1.17674	0.752732	55.4521	16.0702	0	3
8.61526	0.877583	0.561367	30.213	218.525	0	3
7.642	2	1.27935	43.5691	187.463	0	3
9.01256	1.77764	1.13711	40.044	193.084	0	3
7.67325	1.61115	1.03061	43.3183	183.402	0	3
8.93457	1.72737	1.10495	44.8026	181.627	0	3
8.82083	1.88056	1.20294	51.2694	175.137	0	3
8.52086	1.71655	1.09803	46.7942	174.658	0	3
9.01189	1.62188	1.03747	42.786	186.54	0	3
7.57143	1.90439	1.21819	45.1665	154.218	0	3
8.80859	1.7526	1.12109	60.263	153.068	0	3
8.79146	1.18391	0.757315	34.9475	178.027	0	3
6.40575	1.1885	0.760251	55.492	150.795	0	3
8.71212	1.37879	0.881974	36.2242	169.265	0	3
7.29694	1.16889	0.747709	50.2372	133.741	0	3
8.20427	1.2777	0.817313	38.9786	152.828	0	3
6.15398	0.71912	0.460002	68.3723	142.111	0	3
9.44891	1.54879	0.990723	49.1297	145.973	0	3
7.77342	1.561	0.998532	58.1351	119.827	0	3
7.78831	1.45974	0.933757	59.5377	121.742	0	3
6.66964	0.744048	0.475948	41.131	123.163	0	3
7.01324	1.57521	1.00762	54.3249	102.824	0	3
8.72351	1.52758	0.97715	46.8621	133.05	0	3
7.40191	1.27512	0.81566	49.6364	98.0203	0	3
8.95848	1.45311	0.929518	63.3329	112.252	0	3
7.72922	1.09651	0.701411	48.6032	118.773	0	3
6.81716	1.04478	0.668316	45.791	85.2831	0	3
7.0209	1.03433	0.661632	48.8627	101.391	0	3
6.48007	1.0364	0.662955	52.0035	85.2614	0	3
7.18076	1.09619	0.701201	54.2869	80.4429	0	3
7.78719	1.2532	0.80164	62.0631	87.1548	0	3
6.34959	0.926829	0.592868	67.8638	71.4647	0	3
8.28629	1.39113	0.889868	64.5202	76.4766	0	3
6.6525	0.626617	0.400831	45.8262	91.8862	0	3
8.55137	1.13185	0.724014	53.2474	75.1954	0	3
7.76622	1.50095	0.960121	60.0143	65.1453	0	3
8.17464	1.53469	0.9817	70.5622	59.1346	0	3
8.38627	1.23137	0.787676	64.8657	62.535	0	3
9.16648	1.67933	1.07422	62.2168	66.5159	0	3
8.18617	1.42872	0.913916	62.7702	50.636	0	3
10.3129	1.18772	0.759751	61.2897	58.82	0	3
7.85458	1.26133	0.806838	69.5511	45.693	0	3
8.09561	1.1161	0.713938	94.4888	42.7441	0	3
9.29204	1.05841	0.677036	50.7503	18.2463	0	3
8.33172	1.13579	0.726535	65.0136	44.88	0	3
7.73634	1.03782	0.663863	76.1555	37.1083	0	3
7.85294	1.14982	0.735507	54.5855	6.32437	0	3
7.22908	1.09465	0.700219	120.667	34.68	0	3
6.11402	0.784284	0.501685	57.0139	13.6551	0	3
7.00444	0.998889	0.638963	86.9978	18.278	0	3
9.14273	1.20161	0.768635	64.9153	30.26	0	3
7.04278	0.764706	0.489162	86.9385	19.72	0	3
7.32727	0.709091	0.453587	71.8929	17.68	0	3
7.38498	1.07042	0.684721	50.554	7.17231	0	3
8.19981	0.956232	0.611676	50.471	8.86611	0	3
7.86219	1.03075	0.659345	50.2995	9.52	0	3
9.18054	3.00938	1.92502	49.4642	191.236	0	3
7.64072	1.82275	1.16597	44.9832	177.344	0	3
10.1463	2.03874	1.30413	36.4003	204.709	0	3
7.89637	2.18653	1.39866	50.7487	165.992	0	3
7.23745	1.21665	0.778256	41.8188	163.342	0	3
11.2005	1.94602	1.24481	43.4949	193.92	0	3
8.72542	1.77267	1.13393	47.53	175.683	0	3
7.06297	0.804786	0.5148	35.4043	162.161	0	3
8.12481	1.0898	0.697118	42.6758	162.513	0	3
7.73557	1.66846	1.06727	52.294	145.915	0	3
7.739	1.08065	0.69126	37.3798	164.344	0	3
7.66157	0.9869	0.631293	35.952	152.416	0	3
8.73908	1.87721	1.2008	50.4404	145.011	0	3
8.85548	1.201	0.768246	41.5249	161.328	0	3
8.02427	1.51852	0.971356	39.8352	152.866	0	3
8.09863	1.24583	0.796923	52.1108	132.926	0	3
7.06759	0.792627	0.507022	36.6022	127.732	0	3
8.80626	1.65276	1.05722	45.9046	148.771	0	3
6.18554	0.824164	0.527196	72.2934	112.93	0	3
8.28778	0.921325	0.589347	57.4141	136.337	0	3
5.79948	0.803408	0.513919	56.1455	108.27	0	3
6.15769	0.628846	0.402256	52.8462	140.963	0	3
7.62473	1.23861	0.792307	49.0054	124.915	0	3
6.55233	1.34109	0.857857	62.969	102.602	0	3
6.88192	1.12177	0.717567	52.679	105.543	0	3
8.92	1.34162	0.8582	50.8562	118.556	0	3
7.00677	0.981055	0.627555	45.7118	92.5062	0	3
7.15672	0.726368	0.464638	45.6194	108.351	0	3
7.84429	1.12476	0.719478	54.8114	84.5787	0	3
10.5358	1.21504	0.77723	54.2197	80.8385	0	3
9.49054	1.33417	0.853436	52.9811	73.2146	0	3
6.36595	0.857143	0.548292	68.6008	42.8832	0	3
7.96865	1.44233	0.92262	72.4356	49.3703	0	3
6.41553	0.828006	0.529654	72.4444	39.6505	0	3
8.14009	1.06606	0.68193	51.7847	56.5638	0	3
8.08303	1.3583	0.868871	81.8303	33.3997	0	3
7.51819	1.08269	0.692568	95.1996	19.2483	0	3
8.43856	1.10805	0.708791	73.9269	43.9022	0	3
8.02957	0.949821	0.607575	67.552	30.7451	0	3
8.4037	1.03113	0.659586	75.4796	33.7612	0	3
9.20316	0.988421	0.632267	69.6147	28.22	0	3
7.79317	1.02008	0.652518	61.006	24.715	0	3
7.54004	1.05411	0.674288	54.3701	6.67994	0	3
8.54671	1.17516	0.751718	56.5255	16.6704	0	3
8.19006	1.04191	0.666482	67.1218	19.4871	0	3
6.58594	0.666667	0.426449	78.0573	11.9581	0	3
8.6236	1.54527	0.988468	42	186.925	0	3
8.67158	1.18105	0.755488	34.7347	200.001	0	3
7.29327	1.92548	1.23168	53.0517	168.701	0	3
8.58884	1.28488	0.821901	35.6226	185.071	0	3
10.2955	1.9145	1.22465	37.6004	196.305	0	3
7.87434	1.59127	1.01789	43.8082	158.527	0	3
8.85249	1.53002	0.978711	37.3328	173.937	0	3
8.11325	1.37259	0.878012	45.6251	163.646	0	3
8.3653	1.23516	0.790099	47.847	166.075	0	3
9.44598	1.16206	0.743339	42.3153	169.875	0	3
7.66989	1.52901	0.978064	51.0041	136.365	0	3
8.76586	1.36103	0.870613	47.1511	140.89	0	3
7.8686	1.60719	1.02808	62.4896	127.781	0	3
7.12173	1.33902	0.856537	50.8146	120.654	0	3
8.50938	1.563	0.999811	48.6582	135.756	0	3
7.27234	0.998582	0.638766	43.6383	122.251	0	3
7.90711	1.18578	0.75851	53.9623	114.042	0	3
8.10185	1.22222	0.781823	45.3206	130.626	0	3
7.98167	0.985	0.630078	46.365	120.865	0	3
7.77887	1.1493	0.735174	49.7056	122.134	0	3
8.8961	1.33117	0.851513	58.213	102.93	0	3
8.0534	0.794903	0.508478	90.3362	102.139	0	3
7.09169	1.18339	0.756981	59.9385	79.4939	0	3
7.94876	0.687279	0.439634	26.6131	75.8322	0	3
8.92447	1.41596	0.90575	63.0096	83.0283	0	3
7.5601	1.17519	0.751739	61.8887	89.1663	0	3
6.43204	1.08981	0.69712	79.267	63.3541	0	3
7.96761	1.23752	0.791607	51.8462	73.4754	0	3
6.43316	0.909091	0.581521	69.0481	48.7518	0	3
6.29818	0.958333	0.61302	101.996	58.6586	0	3
7.47041	0.698225	0.446636	81.9512	70.72	0	3
7.01202	1.25683	0.803961	66.5071	38.4801	0	3
7.46067	0.904494	0.578581	64.3989	62.8816	0	3
9.03614	1.21577	0.777697	64.3341	58.4256	0	3
9.40122	1.5	0.95951	71.2341	46.7732	0	3
7.80277	1.70362	1.08976	86.2601	28.1523	0	3
8.89072	1.69448	1.08391	70.3149	36.5243	0	3
7.83058	1.21122	0.774786	74.7558	43.5744	0	3
7.76198	0.802395	0.513271	85.3503	49.64	0	3
8.57314	1.32205	0.845682	74.4028	28.6973	0	3
7.98253	1.09716	0.701825	68.2784	27.0059	0	3
6.9904	0.8976	0.574171	47.224	11.1373	0	3
8.66893	2.45578	1.5709	49.2313	190.675	0	3
8.03766	1.8159	1.16158	46.8933	190.085	0	3
8.83468	2.30632	1.47529	44.5413	185.205	0	3
10.1472	1.53177	0.979834	35.5753	211.14	0	3
10.3221	1.44595	0.924933	40.0721	204.558	0	3
7.03659	1.7439	1.11553	51.0122	191.847	0	3
9.16196	1.39736	0.893856	45.8362	177.182	0	3
8.30102	1.87075	1.19667	46.1514	170.848	0	3
7.35919	1.80438	1.15422	46.3929	156.659	0	3
7.90994	1.50932	0.96547	44.3587	158.92	0	3
7.15906	1.83724	1.17523	57.5351	148.639	0	3
6.46855	0.941432	0.602209	78.974	144.925	0	3
9.70637	1.83573	1.17427	47.6037	166.8	0	3
7.62853	1.38136	0.883617	39.6893	159.778	0	3
7.33708	0.895131	0.572592	46.6835	145.927	0	3
8.86769	1.18462	0.757767	51.8692	131.513	0	3
8.92514	1.5452	0.988422	49.6299	155.005	0	3
7.43611	1.23056	0.787154	45.1958	136.653	0	3
7.66833	1.06484	0.681149	44.0798	145.946	0	3
8.09359	1.36667	0.87422	48.2487	116.048	0	3
7.95404	1.31537	0.841409	54.3693	135.293	0	3
8.84906	1.61635	1.03394	59.2788	123.108	0	3
6.31656	1.23052	0.787131	52.7013	84.7282	0	3
5.92925	0.585086	0.374264	40.4627	87.1488	0	3
8.31008	1.10233	0.705128	52.1333	106.015	0	3
7.08511	1.08511	0.694114	61.6459	85.1366	0	3
7.53009	1.37679	0.880697	58.8625	63.5582	0	3
8.28047	1.39882	0.894786	66.5053	68.0085	0	3
7.59208	1.28744	0.823538	55.0516	72.0688	0	3
6.78816	1.53421	0.981394	66.0947	76.0157	0	3
7.76329	1.3756	0.879937	67.6449	60.1531	0	3
9.26567	1.48501	0.949924	74.5123	28.89	0	3
7.74586	1.3605	0.870274	49.3315	11.56	0	3
6.63975	1.31677	0.842303	45.6046	5.1	0	3
7.61284	1.46998	0.940307	29.3892	216.223	0	3
6.9709	1.09524	0.700595	27.246	199.568	0	3
10.2857	1.37103	0.877013	38.3889	202.76	0	3
7.22509	1.82818	1.16944	46.933	168.275	0	3
6.37084	1.12788	0.721473	38.0614	150.025	0	3
6.6408	1.15517	0.738933	57.5776	158.036	0	3
6.16711	1.49605	0.956985	53.8921	176.594	0	3
6.34855	1.02697	0.656926	40.3485	159.244	0	3
5.84701	0.818182	0.523369	42.9379	151.455	0	3
6.66667	0.698582	0.446864	32.5213	130.945	0	3
6.27526	0.745645	0.476969	46.9686	140.913	0	3
5.5	0.690476	0.441679	68.9881	107.539	0	3
6.06859	0.501805	0.320991	29.213	98.6193	0	3
8.6337	1.36996	0.876329	72.3132	101.304	0	3
7.89981	1.38941	0.888771	76.7183	120.497	0	3
6.15078	1.01109	0.646765	49.9889	88.0567	0	3
5.67529	0.752941	0.481637	41.1012	73.3471	0	3
9.99778	1.12195	0.717682	53.8758	94.2021	0	3
6.24841	0.910828	0.582633	39.9363	93.1606	0	3
7.21799	0.564014	0.360785	41.7301	58.8446	0	3
6.16088	0.750789	0.48026	54.5521	50.1197	0	3
6.31644	1.1863	0.758846	69.6603	47.0037	0	3
6.73217	1.29112	0.825896	41.7438	9.28019	0	3
6.27826	0.96087	0.614643	55.813	20.74	0	3
6.70902	1.11418	0.712712	55.6059	12.2589	0	3
5.28488	1.23201	0.788085	42.1542	6.77445	0	3
6.29988	1.08985	0.697147	60.1412	15.64	0	3
6.20871	1.22323	0.782468	40.2795	4.09414	0	3
104.183	10.4126	4.87221	77.313	47.1964	1	4
174.107	19.9498	9.33479	46.347	38.757	1	4
197.926	13.7323	6.42552	85.2025	84.0708	1	4
43.964	2.71622	1.27095	76.9009	95.5206	1	4
75.5642	7.28877	3.41051	28.9439	28.4668	1	4
200.339	83.6183	39.1261	72.4935	17.7973	1	4
38.8599	2.05238	0.960333	65.1973	48.9895	1	4
72.2151	2.46709	1.15439	64.5425	83.7753	1	4
167.942	41.4124	19.3774	61.4531	111.431	1	4
248.21	92.2008	43.1419	69.8121	13.26	1	4
36.7274	2.93607	1.37382	61.7756	75.1592	1	4
109.076	28.3406	13.2609	68.2166	121.29	1	4
128.325	31.3191	14.6546	63.127	91.3487	1	4
81.1489	23.0782	10.7986	70.0562	53.1717	1	4
110.206	37.257	17.433	76.9182	94.2193	1	4
28.0892	1.78875	0.836978	69.1529	22.194	1	4
58.4827	2.74797	1.28581	68.7663	41.5691	1	4
85.2734	15.7727	7.38023	61.1002	84.9898	1	4
51.0682	18.6454	8.7244	76.1652	74.8657	1	4
50.8964	2.7398	1.28199	67.7442	96.9954	1	4
96.1786	36.0787	16.8817	70.3491	77.8177	1	4
84.1973	29.1452	13.6374	58.8521	87.826	1	4
87.9114	49.9018	23.3497	65.5545	81.3652	1	4
106.122	37.9312	17.7485	70.5481	63.9073	1	4
84.2264	26.9567	12.6134	79.6771	79.1726	1	4
116.358	5.25433	2.45857	62.1345	6.67994	1	4
110.011	28.7352	13.4456	71.9658	63.7335	1	4
92.264	34.0748	15.944	79.1671	54.06	1	4
109.99	9.28141	4.34289	26.7387	22.78	1	4
32.4072	5.03516	2.35601	58.6572	99.9004	1	4
94.8036	35.885	16.791	66.1862	15.9945	1	4
43.3882	2.06327	0.96543	65.7334	16.0378	1	4
103.924	40.0882	18.7578	58.4431	70.0648	1	4
99.0205	21.3201	9.97595	62.4597	79.0037	1	4
127.02	59.3035	27.7489	71.0634	27.2	1	4
105.903	36.3418	17.0048	66.0179	58.7325	1	4
110.82	17.1921	8.04442	62.5337	76.1243	1	4
123.417	34.5267	16.1555	78.8581	52.4703	1	4
109.556	29.019	13.5784	61.0291	59.5243	1	4
109.062	34.1101	15.9606	54.4583	73.881	1	4
86.2569	54.5737	25.5358	66.9136	60.2788	1	4
112.793	61.8314	28.9317	51.9989	34.0425	1	4
128.028	73.2218	34.2614	58.0175	46.4197	1	4
89.6321	18.96	8.87165	70.4473	73.3282	1	4
94.9623	23.2276	10.8685	57.5436	79.874	1	4
85.5319	36.6542	17.151	61.9194	65.4542	1	4
89.4422	51.4286	24.0641	59.0298	40.1905	1	4
94.1563	21.8174	10.2087	51.5143	78.88	1	4
191.028	57.6754	26.987	70.6684	49.0355	1	4
114.802	38.0849	17.8204	60.6491	73.7863	1	4
202.72	32.0261	14.9854	68.0201	51.3411	1	4
76.6867	60.5067	28.3118	66.98	42.2477	1	4
75.6113	27.9811	13.0927	61.717	68.5056	1	4
9.73609	1.84579	0.863667	72.531	188.7	0	4
9.45324	1.73861	0.813518	67.3285	176.833	0	4
12.9808	2.65385	1.24177	70.6186	166.65	0	4
14.0523	2.62462	1.22809	83.56	133.849	0	4
11.904	2.15789	1.00971	54.1269	178.339	0	4
10.3379	1.93038	0.903247	54.4198	186.269	0	4
11.9	2.25484	1.05507	100.41	131.453	0	4
10.6853	2.15467	1.0082	44.888	184.291	0	4
10.2284	1.93738	0.906527	48.1897	173.895	0	4
9.9686	1.57851	0.738606	83.3636	59.5388	0	4
10.4254	1.52961	0.715723	103.702	46.7732	0	4
10.6889	1.85484	0.867903	53.9839	139.032	0	4
10.0951	2.08896	0.97745	99.9785	122.688	0	4
8.54265	1.51659	0.709631	78.1517	153.761	0	4
14.4731	2.22646	1.04179	80.3686	66.6825	0	4
7.84763	1.49323	0.698701	57.3916	197.239	0	4
12.0828	2.50307	1.17122	51.2577	177.433	0	4
14.7855	2.52157	1.17988	66.2716	146.656	0	4
11.4711	1.97639	0.924777	45.634	189.054	0	4
12.7504	1.91997	0.898377	71.3821	75.2507	0	4
8.86658	1.57951	0.739075	101.593	88.1709	0	4
9.26371	1.62427	0.760017	86.4831	58.2205	0	4
12.8173	2.18539	1.02257	67.6658	96.9638	0	4
13.5851	2.16452	1.01281	54.9814	181.507	0	4
9.0536	2.01685	0.943708	101.862	140.28	0	4
10.8199	1.83709	0.859596	109.834	81.6708	0	4
11.3317	2.20532	1.0319	64.852	93.7229	0	4
9.30414	1.81688	0.850141	98.4825	104.488	0	4
10.3247	1.92	0.898393	60.4577	119.041	0	4
11.6006	2.09119	0.978497	50.8616	178.195	0	4
11.5871	3.03598	1.42058	66.3068	163.458	0	4
10.7842	2.36451	1.10638	54.3022	146.431	0	4
10.5518	2.3854	1.11616	50.2555	185.225	0	4
10.4634	1.85653	0.868693	77.0473	158.089	0	4
13.2792	2.52772	1.18275	91.4627	75.233	0	4
8.86284	1.798	0.84131	64.5387	139.046	0	4
9.13441	1.63262	0.763922	31.4552	204.862	0	4
12.7375	3.00322	1.40525	114.739	106.616	0	4
10.7742	2.0227	0.946447	44.4265	181.104	0	4
13.6946	1.76915	0.827809	111.699	69.4241	0	4
10.6459	1.69378	0.792541	48.8086	159.617	0	4
9.87282	2.14963	1.00584	69.3042	132.518	0	4
11.5022	2.1927	1.02599	65.3343	125.413	0	4
12.2045	2.13574	0.99934	67.0876	57.4841	0	4
11.3992	2.31311	1.08233	54.8571	156.2	0	4
11.0494	2.18919	1.02435	60.6287	145.509	0	4
8.33149	2.3453	1.0974	36.5276	208.52	0	4
13.0456	2.32688	1.08878	81.9487	106.298	0	4
9.41799	2.52557	1.18175	48.1905	174.443	0	4
10.8211	2.13684	0.999856	59.1449	114.243	0	4
12.642	2.25969	1.05734	75.193	65.8741	0	4
9.90998	2.30657	1.07927	42.6594	186.851	0	4
10.8569	2.31743	1.08436	40.4477	196.36	0	4
10.483	1.91837	0.897629	78.8844	101.232	0	4
9.17662	1.91045	0.893923	92.99	129.397	0	4
10.9892	2.28915	1.07112	47.5833	151.972	0	4
9.51902	2.23098	1.0439	39.9701	201.424	0	4
13.6484	2.27567	1.06481	94.27	108.538	0	4
12.6111	2.52361	1.18083	82.1833	77.3468	0	4
10.4545	1.92088	0.898802	50.1448	155.64	0	4
9.52985	1.91045	0.893923	42.5299	163.633	0	4
11.9717	1.97297	0.923179	68.559	97.0192	0	4
11.1817	1.90552	0.891619	120.557	114.224	0	4
9.75487	1.94986	0.912365	55.4178	139.438	0	4
11.6368	2.58744	1.2107	68.343	108.593	0	4
10.4155	1.98251	0.927641	46.5117	165.288	0	4
7.50549	1.34725	0.630397	81.8681	93.5402	0	4
8.46467	1.4454	0.676319	50.4433	127.629	0	4
11.2943	1.95978	0.917007	66.4552	73.4754	0	4
9.23096	2.31204	1.08183	42.2015	171.356	0	4
10.0031	2.06126	0.964488	57.7289	117.534	0	4
9.12634	2.05567	0.961877	50.2934	136.131	0	4
11.6865	2.08922	0.977573	65.6964	63.9101	0	4
8.32267	2.00533	0.938321	45.9093	153	0	4
8.54195	2.44916	1.14599	45.8075	185.506	0	4
8.2606	1.4752	0.690266	92.5104	101.927	0	4
10.4818	1.73071	0.809823	60.3173	92.0842	0	4
8.30879	1.78528	0.835354	41.2188	162.782	0	4
12.1264	2.02686	0.948392	60.9573	125.287	0	4
11.8453	1.95966	0.916951	64.7929	55.9091	0	4
11.9553	1.92114	0.898928	66.6148	66.8928	0	4
9.24934	1.60892	0.752836	44.6129	142.462	0	4
10.7235	1.7639	0.825351	76.2296	109.776	0	4
10.1988	1.88372	0.881417	54.9988	115.88	0	4
9.17352	1.9239	0.900216	44.6286	129.666	0	4
11.018	1.98325	0.927987	45.8492	150.74	0	4
9.20032	1.79653	0.840619	48.8722	120.958	0	4
9.64993	1.48954	0.696975	53.0028	84.1862	0	4
8.75253	2.51768	1.17805	36.6389	173.791	0	4
10.6017	1.62335	0.759584	62.0156	72.6821	0	4
8.89175	2.54124	1.18908	33.6778	178.041	0	4
9.07605	1.79468	0.839752	49.8048	118.964	0	4
8.33612	1.49061	0.697473	59.1921	79.6711	0	4
9.95762	1.57242	0.735757	60.8495	56.9944	0	4
9.0678	3.0678	1.43546	46.1996	164.884	0	4
8.25919	2.00735	0.939266	45.9522	142.171	0	4
8.70305	2.01861	0.944535	38.0296	152.602	0	4
6.60478	1.58088	0.739715	30.5276	185.316	0	4
6.86973	1.64751	0.770891	46.7241	177.047	0	4
9.88328	1.51533	0.709043	47.7547	129.64	0	4
7.86653	1.46612	0.686016	58.4025	74.2571	0	4
8.39125	1.67507	0.783785	46.1565	115.264	0	4
7.1758	2.10731	0.986036	34.21	171.194	0	4
7.13965	1.30923	0.612604	73.5237	55.2037	0	4
10.3216	1.52549	0.713796	95.4353	70.7862	0	4
14.8887	2.61285	1.22259	68.3589	159.097	0	4
14.785	2.4381	1.14082	82.0327	95.4262	0	4
9.02101	1.57143	0.735292	74.1639	182.92	0	4
12.5847	1.71718	0.803489	93.6807	79.9311	0	4
14.9483	2.67241	1.25046	82.1681	106.386	0	4
8.53659	1.46098	0.683609	57.9561	187.523	0	4
9.03735	1.33618	0.625215	33.9968	193.718	0	4
11.3616	1.96125	0.917696	47.1236	185.757	0	4
9.94433	6.07753	2.84376	98.0895	77.5595	0	4
9.78086	2.32746	1.08905	115.955	83.4172	0	4
8.70928	1.61492	0.75564	86.0274	176.596	0	4
10.5241	1.74828	0.818041	126.141	85.4726	0	4
9.63978	1.42115	0.664973	82.4659	49.5992	0	4
13.0031	2.10041	0.98281	67.3368	106.882	0	4
13.0202	2.35651	1.10264	63.4046	159.955	0	4
13.0758	2.04739	0.958002	78.7615	118.461	0	4
12.3439	2.44238	1.14282	49.3699	170.393	0	4
11.8128	2.24789	1.05182	51.4334	160.125	0	4
10.6048	1.84191	0.861855	62.5337	132.029	0	4
10.7979	2.18206	1.02101	45.3249	163.399	0	4
10.5943	1.80189	0.843126	52.816	134.251	0	4
12.3624	1.66284	0.778066	110.532	94.0621	0	4
9.52994	2.09431	0.979955	34.0359	203.369	0	4
11.1623	2.3694	1.10867	43.2899	191.299	0	4
11.551	1.91043	0.893915	60.3481	147.7	0	4
13.0554	2.51073	1.1748	62.8802	64.7751	0	4
10.3583	1.88583	0.882403	43.4587	177.152	0	4
10.6574	1.84602	0.863777	71.6696	115.625	0	4
10.66	2.19808	1.02851	48.2935	189.773	0	4
10.3163	1.92245	0.899539	61.4612	134.582	0	4
12.2675	2.13548	0.999217	58.7474	122.86	0	4
12.7103	2.27758	1.06571	56.6727	162.627	0	4
12.2559	2.72986	1.27734	42.4348	182.306	0	4
9.08378	1.99189	0.932032	38.5135	196.863	0	4
9.4573	1.61461	0.755495	77.3213	145.579	0	4
9.72135	1.71354	0.801788	95.2891	87.5591	0	4
8.59777	1.74086	0.81457	38.0843	175.054	0	4
10.4047	2.07765	0.972158	41.7694	183.658	0	4
8.61525	1.92021	0.898492	101.518	131.924	0	4
9.36387	1.69935	0.79515	39.2335	154.973	0	4
8.6332	1.75447	0.820941	67.9215	143.072	0	4
9.80488	1.39721	0.653774	83.9826	54.6174	0	4
11.1729	1.82189	0.852486	61.4734	100.664	0	4
11.6309	2.21306	1.03552	74.3986	112.184	0	4
9.91595	1.79915	0.841843	48.8718	145.598	0	4
9.66457	1.72441	0.806873	59.9811	118.808	0	4
10.0228	1.51368	0.708269	53.3936	83.2167	0	4
7.8474	1.36526	0.638823	51.487	125.173	0	4
11.2794	1.80078	0.842606	68.9728	43.7161	0	4
9.79654	1.82314	0.85307	52.6715	99.8842	0	4
10.448	1.653	0.773461	63.6442	79.0271	0	4
9.15534	2.70631	1.26632	49.2985	99.7771	0	4
8.97552	1.5799	0.739254	49.5399	113.493	0	4
11.5423	1.29751	0.607123	67.881	54.7273	0	4
8.52685	2.68792	1.25771	40.3926	173.517	0	4
12.215	1.63611	0.765557	54.1767	15.5993	0	4
9.15576	1.23988	0.580154	50.4517	95.615	0	4
9.64229	1.68521	0.788534	50.1574	105.782	0	4
9.81122	1.46939	0.687545	53.1327	34.6233	0	4
9.42536	1.13917	0.533032	49.936	24.8758	0	4
11.1956	1.92339	0.89998	69.4938	28.6287	0	4
11.1649	1.60942	0.753069	53.8842	14.0885	0	4
7.69808	1.43269	0.670375	39.4635	146.74	0	4
6.66019	1.14078	0.533784	51.0372	94.846	0	4
8.52447	1.61982	0.757937	45.4542	122.883	0	4
[truncated: 4,514 more rows]
