# Supplementary material for: The pattern of nodal morphogen signaling is shaped by co-receptor expression
Source: eLife. 2021 May 26;10:e54894. doi: 10.7554/eLife.54894 (PMC8266389; doi:10.7554/eLife.54894)
Supplement: Figure 2—source data 3. — The quantified fluorescence intensities are organized in this table. Each row corresponds to an individual nucleus. The following characteristics were quantified: average GFP pixel intensity (‘GFP’), average pixel intensity for α-pSmad2 staining (‘pSmad2Raw’), α-pSmad2 staining intensity normalized to background (‘pSmad2 Normalized’), average DAPI pixel intensity (‘DAPI’), distance from the embryonic margin in μm (‘marginDist’), GFP staining status (‘GFP_Flag’, 0 denotes a cell host nucleus, one denotes a sensor cell nucleus), and embryo replicate number (‘Embryo Number’). We note that normalized α-pSmad2 staining was used to generate the figure panel. [file elife-54894-fig2-data3.xlsx]

## Sheet: Sheet1
GFP	pSmad2Raw	pSmad2Normalized	DAPI	marginDist	GFP_Flag	EmbryoNumber
100.266	58.6778	26.7516	52.2136	23.3216	1	1
85.251	36.6173	16.6941	44.2551	28.6328	1	1
103.511	69.1038	31.5049	65.0072	52.02	1	1
206.932	101.321	46.1932	72.5065	26.9374	1	1
56.2193	28.4132	12.9538	62.551	82.468	1	1
67.5158	70.8733	32.3117	56.7568	5.44	1	1
60.5403	19.7105	8.98615	51.4787	113.755	1	1
60.1476	20.7637	9.46634	51.7127	77.2967	1	1
61.3034	30.8445	14.0622	54.3101	63.7434	1	1
107.035	65.3178	29.7788	78.5015	58.7167	1	1
123.246	81.8908	37.3346	62.7508	47.5721	1	1
112.487	5.46353	2.49086	51.7313	127.986	1	1
39.6736	7.67631	3.49968	57.0468	122.718	1	1
47.7044	18.369	8.37457	54.7431	108.214	1	1
53.78	36.2699	16.5357	51.0472	64.6	1	1
139.973	69.2058	31.5514	54.1389	40.4085	1	1
70.2235	66.3063	30.2295	61.957	61.0222	1	1
96.7383	49.3149	22.483	46.8877	56.1443	1	1
58.4295	17.7431	8.0892	44.6751	108.273	1	1
58.6801	49.432	22.5364	44.1824	76.6117	1	1
75.716	30.0718	13.7099	50.0046	73.5564	1	1
77.0375	81.8689	37.3246	45.6404	43.3417	1	1
67.9516	80.448	36.6768	51.1009	59.4835	1	1
48.0587	77.0077	35.1084	54.7731	49.0178	1	1
86.5023	4	1.82363	38.9877	186.02	1	1
77.0413	8.4915	3.87134	45.3617	124.506	1	1
65.7357	73.7476	33.6221	44.0595	65.9469	1	1
52.6834	34.9296	15.9246	47.29	72.0832	1	1
66.5671	38.0505	17.3475	39.0212	66.9722	1	1
94.8515	72.7571	33.1705	53.1879	61.54	1	1
70.1732	4.81123	2.19348	43.9126	178.202	1	1
44.2729	23.5079	10.7174	54.5831	109.195	1	1
78.0944	55.0414	25.0938	55.67	76.0157	1	1
45.402	51.3953	23.4315	43.1284	70.6227	1	1
77.0781	91.8368	41.8691	47.1146	38.8077	1	1
100.765	4.70717	2.14603	41.3769	198.262	1	1
49.0325	22.1248	10.0869	42.4551	104.679	1	1
65.8886	23.2067	10.5801	46.604	96.4144	1	1
54.6107	64.9027	29.5896	43.1072	69.0334	1	1
126.592	7.58065	3.45607	44.2163	184.169	1	1
58.9365	52.8285	24.0849	44.705	77.153	1	1
68.4062	66.3141	30.2331	46.9918	68.3468	1	1
6.52435	1.68182	0.766753	51.3409	192.562	0	1
6.15525	1.80974	0.825074	49.0944	192.791	0	1
7.17719	2.07193	0.944608	62.8123	147.729	0	1
6.47135	2.1076	0.960871	50.4327	174.243	0	1
6.2731	1.79466	0.818199	60.9815	163.626	0	1
6.90137	3.07199	1.40054	62.6847	167.729	0	1
8.20513	4.47436	2.03989	57.5989	112.248	0	1
11.9657	9.40333	4.28704	87.8254	101.141	0	1
8.43059	4.44235	2.0253	70.3847	116.838	0	1
6.78261	20.9178	9.53656	55.2854	105.06	0	1
5.85069	15.0451	6.85919	49.7361	108.031	0	1
8.526	26.0119	11.859	67.1025	78.4398	0	1
6.69307	8.21782	3.74656	59.9802	99.0107	0	1
7.36917	11.3564	5.17748	66.6337	107.018	0	1
7.39785	9.15412	4.17343	54.5723	108.756	0	1
5.61364	10.3539	4.72042	63.3539	106.16	0	1
6.35	6.67333	3.04242	108.017	87.0679	0	1
8.20718	21.8206	9.94817	56.2465	91.7887	0	1
10.9756	21.7934	9.93575	71.4237	75.4195	0	1
7.03606	40.9123	18.6522	54.78	72.237	0	1
5.52688	5.40323	2.46337	77	85.2614	0	1
6.38504	37.4398	17.0691	54.6515	62.4611	0	1
9.69466	53.7294	24.4956	57.5649	69.5414	0	1
8.02091	40.6913	18.5514	58.0418	72.7385	0	1
9.1168	56.043	25.5504	56.0497	48.2429	0	1
11.2655	73.4614	33.4916	55.3936	42.2107	0	1
8.85385	68.6308	31.2893	60.9487	51.6532	0	1
11.5376	68.9106	31.4169	64.9948	55.0779	0	1
7.13758	58.7844	26.8002	53.5585	33.2749	0	1
9.90029	49.9624	22.7782	58.7572	47.6837	0	1
9.06833	81.8283	37.3061	58.1	31.2541	0	1
12.1938	63.243	28.8329	55.9705	39.5761	0	1
8.52284	85.7462	39.0923	54.8426	19.1157	0	1
11.7981	74.6362	34.0272	70.7147	20.8318	0	1
11.4764	100.323	45.7382	55.0199	19.1399	0	1
14.4647	72.0929	32.8677	74.26	14.9368	0	1
6.1764	1.5	0.683861	37.6402	196.643	0	1
8.3843	2.16942	0.989055	62.3402	173.706	0	1
6.28232	1.67162	0.762104	44.8321	199.337	0	1
5.96865	1.61081	0.73438	39.253	188.641	0	1
6.85734	1.82271	0.830989	56.2175	198.074	0	1
7.07922	1.76104	0.80287	48.626	198.08	0	1
7.41242	1.32962	0.606182	47.5	170.607	0	1
6.63063	1.64264	0.748893	40.6682	190.905	0	1
7.09524	1.8881	0.860796	61.2667	161.235	0	1
6.13989	1.21982	0.556127	68.9209	185.462	0	1
6.83607	1.43033	0.652097	75.3443	172.989	0	1
6.98238	1.82526	0.832148	56.4758	193.63	0	1
6.98193	1.32982	0.606274	44.0542	166.194	0	1
5.89886	2.41026	1.09885	41.1296	180.361	0	1
7.42366	2.01908	0.920515	54.2048	185.457	0	1
6.03528	1.88078	0.857461	39.0608	176.295	0	1
6.92479	1.78261	0.812704	54.1034	193.351	0	1
7.51832	1.75079	0.798196	53.1853	176.992	0	1
7.91901	1.80661	0.823647	54.0017	172.491	0	1
6.85458	2.8366	1.29323	43.7173	177.101	0	1
7.29935	2.62222	1.19549	51.417	188.908	0	1
7.93525	1.82049	0.829975	57.5492	184.072	0	1
7.36644	2.57315	1.17312	55.1933	182.982	0	1
7.59524	1.80357	0.822261	70.6333	158.021	0	1
6.91694	1.93522	0.882279	53.8173	168.824	0	1
8.599	3.09484	1.41096	51.9251	140.036	0	1
7.43095	1.95341	0.890574	52.213	176.308	0	1
7.53999	1.51818	0.692147	43.3714	161.402	0	1
7.66906	2.32518	1.06007	54.495	168.797	0	1
6.91436	2.54156	1.15872	49.9836	176.183	0	1
7.36138	1.72138	0.784789	99.9793	144.602	0	1
7.33078	3.05921	1.39472	48.8106	163.834	0	1
6.75342	2.43836	1.11166	55.7397	172.11	0	1
9.01046	3.47843	1.58584	59.6837	137.416	0	1
6.88011	3.06948	1.3994	52.3978	167.525	0	1
7.84986	2.4146	1.10083	60.4669	154.87	0	1
7.28528	2.49772	1.13873	51.915	149.639	0	1
8.10256	2.22402	1.01395	51.9865	160.874	0	1
8.49097	2.67268	1.2185	54.3357	140.014	0	1
6.50198	2.70356	1.23257	51.3755	157.256	0	1
8.60843	4.15361	1.89366	61.3464	130.183	0	1
6.27458	3.20965	1.4633	44.7347	152.068	0	1
6.71248	3.1683	1.44445	58.0112	161.807	0	1
8.25283	2.87925	1.31267	63.6289	142.25	0	1
7.54925	3.14925	1.43577	52.5299	159.987	0	1
8.09786	2.29004	1.04404	59.5036	150.784	0	1
7.30566	5.69073	2.59445	54.1625	156.876	0	1
7.14423	2.95	1.34493	52.55	154.083	0	1
6.68374	5.41741	2.46984	51.4827	148.434	0	1
6.6992	4.82285	2.19877	49.2704	142.161	0	1
6.31994	2.69775	1.22992	56.2797	151.368	0	1
7.83427	2.54991	1.16252	53.113	127.986	0	1
8.62867	3.43948	1.56809	58.7215	147.044	0	1
6.41611	1.42282	0.648673	92.5503	122.625	0	1
11.2447	10.7779	4.91374	79.8784	108.456	0	1
7.53325	3.75123	1.71021	59.8966	154.681	0	1
8.37339	2.54721	1.16129	91.0558	136.199	0	1
8.27548	3.51102	1.6007	61.1708	149.422	0	1
6.81865	3.02936	1.38111	47.8204	147.192	0	1
7.06607	9.028	4.11593	47.4535	129.009	0	1
6.65666	3.42214	1.56018	43.9156	137.146	0	1
7.49536	2.82019	1.28574	57.9803	136.847	0	1
7.15493	3.49899	1.59522	67.4527	138.711	0	1
7.70615	3.14237	1.43263	54.0478	127.779	0	1
6.54561	2.8296	1.29004	54.1738	136.372	0	1
6.14815	4.38194	1.99776	49.2593	140.631	0	1
6.98771	7.86241	3.58453	58.3584	133.862	0	1
8.96005	7.18908	3.27755	70.494	118.899	0	1
6.22734	3.42942	1.5635	73.4918	125.942	0	1
5.74495	10.189	4.64524	46.7321	120.611	0	1
5.72562	4.25737	1.94097	63.6179	118.011	0	1
6.85911	5.71398	2.60505	52.8432	136.235	0	1
7.51608	4.75439	2.16756	54.886	128.108	0	1
7.74937	4.85768	2.21465	51.9421	131.064	0	1
8.52292	6.02865	2.74851	66.3911	107.543	0	1
6.77894	15.2025	6.93095	49.8924	116.889	0	1
6.81818	4.85714	2.21441	49.4416	128.311	0	1
6.14371	3.27395	1.49262	70.5584	115.861	0	1
6.15235	5.91065	2.69471	43.2417	126.984	0	1
8.26544	5.73216	2.61333	58.5758	117.851	0	1
7.59406	6.41584	2.92503	57.646	116.955	0	1
7.36723	9.74435	4.44252	50.8856	121.521	0	1
7.77171	6.81886	3.10877	62.4727	106.895	0	1
7.3317	8.0866	3.68674	57.0523	113.768	0	1
9.29058	9.91884	4.52207	57.0719	87.5168	0	1
7.329	12.7377	5.80721	52.437	109.985	0	1
6.913	14.6597	6.68346	48.8293	98.6879	0	1
9.30041	21.2414	9.68412	50.8738	69.6477	0	1
6.99441	13.6766	6.23527	47.3597	100.79	0	1
7.62774	6.58084	3.00025	77.3643	78.316	0	1
7.8844	11.7033	5.33564	53.9039	109.309	0	1
7.92638	25.1588	11.4701	56.5794	86.1348	0	1
5.14286	5.08271	2.31724	63.1855	99.1647	0	1
7.82456	13.2126	6.02372	54.9659	98.2129	0	1
7.69397	28.3869	12.9418	53.4763	85.2173	0	1
9.3138	13.5716	6.1874	53.6914	96.9543	0	1
8.29808	23.8329	10.8656	56.0445	87.7075	0	1
7.16287	19.987	9.11221	42.4007	84.1945	0	1
6.29688	34.6317	15.7888	47.0134	76.16	0	1
6.72745	17.4409	7.95143	49.2685	77.8088	0	1
9.56542	14.4243	6.57616	56.3914	87.2317	0	1
9.27238	15.4956	7.06455	56.8575	94.5334	0	1
7.89233	14.323	6.52997	52.4024	90.3869	0	1
6.97479	9.88796	4.50799	76.4748	73.5564	0	1
7.48939	26.6288	12.1403	44.1682	76.5959	0	1
8.00652	20.2269	9.22157	55.3403	85.0204	0	1
7.61958	45.6382	20.8068	53.6629	63.8739	0	1
7.63349	30.0492	13.6996	47.1991	79.3301	0	1
9.43825	21.6042	9.84953	53.6707	72.5484	0	1
12.7611	31.0081	14.1368	60.7974	54.7907	0	1
9.39092	22.3895	10.2075	61.9722	76.4426	0	1
9.32009	40.2202	18.3367	54.1875	67.4572	0	1
8.88547	26.9791	12.2999	56.3855	80.6058	0	1
11.3976	29.7852	13.5793	63.6134	61.1282	0	1
10.018	26.6952	12.1705	55.7717	77.0301	0	1
8.27137	41.174	18.7715	47.7207	56.0165	0	1
9.86321	28.4768	12.9828	56.8513	67.4444	0	1
9.14763	52.1643	23.7821	57.9708	58.8475	0	1
10.7231	46.419	21.1628	51.5538	69.5838	0	1
7.04575	17.0523	7.77426	97.3072	52.1177	0	1
9.31325	45.3328	20.6676	50.9744	59.0789	0	1
10.2153	35.9326	16.3819	54.3891	65.9705	0	1
8.97775	57.4883	26.2093	52.9602	46.285	0	1
9.69085	35.4051	16.1415	52.3661	56.8776	0	1
10.7107	36.7199	16.7409	54.0785	50.4508	0	1
14.48	57.5674	26.2454	64.9478	16.8806	0	1
9.22767	50.4248	22.9891	52.329	42.0186	0	1
10.9072	41.5305	18.9341	64.3064	57.2302	0	1
14.2806	67.2	30.637	59.8126	9.20515	0	1
8.44205	33.2049	15.1383	74.0755	47.4504	0	1
15.1473	66.1849	30.1742	70.7968	34.2118	0	1
11.0484	81.755	37.2727	70.4815	46.7596	0	1
11.1426	82.1631	37.4588	71.5811	48.753	0	1
10.0164	67.825	30.9219	53.3172	34.9423	0	1
10.3588	62.8403	28.6493	49.6013	36.1425	0	1
13.435	63.3533	28.8832	61.635	50.5446	0	1
11.438	84.673	38.603	61.9783	36.2032	0	1
12.2995	48.7838	22.2409	53.8497	44.6993	0	1
10.7346	78.1579	35.6328	70.5675	42.8832	0	1
14.2342	68.7995	31.3662	59.9662	36.5322	0	1
12.809	86.0776	39.2434	67.6328	40.1977	0	1
12.327	66.384	30.265	55.3878	37.508	0	1
13.8186	62.2264	28.3695	55.5738	7.00103	0	1
13.0493	62.5095	28.4985	61.4516	27.0978	0	1
12.3034	77.1143	35.157	52.6731	24.4918	0	1
13.7618	60.1757	27.4345	72.5552	6.60161	0	1
12.1257	24.3571	11.1046	98.1637	23.7514	0	1
14.4755	80.033	36.4876	54.6919	5.201	0	1
12.0903	62.1408	28.3304	57.1891	7.51085	0	1
19.2763	74.5784	34.0008	76.8134	12.9245	0	1
5.86598	1.02474	0.467187	43.8268	194.202	0	1
8.67025	2.03943	0.929789	81.6237	167.132	0	1
6.55388	1.50985	0.688351	39.7671	194.259	0	1
7.20996	1.57576	0.718399	48.2284	199.654	0	1
7.52459	1.61967	0.73842	44.2049	162.731	0	1
7.07902	1.79145	0.816735	40.7111	185.102	0	1
9.65098	2.2436	1.02287	84.1078	156.368	0	1
5.84694	1.31803	0.600898	45	170.882	0	1
7.35323	2.90423	1.32406	49.9552	171.712	0	1
10.3219	2.72208	1.24101	64.7669	145.164	0	1
7.44888	1.81904	0.829312	49.2585	184.103	0	1
6.61503	1.49089	0.679707	60.5558	172.567	0	1
9.45183	2.56174	1.16791	68.1506	163.158	0	1
7.47555	1.66805	0.760478	51.025	179.668	0	1
7.8977	1.82877	0.833752	62.4825	170.786	0	1
6.86655	1.42736	0.650746	91.5372	169.461	0	1
6.98763	2.67717	1.22054	45.0979	159.074	0	1
7.68672	2.29966	1.04843	54.3121	151.43	0	1
7.24762	1.92381	0.877079	48.2068	160.452	0	1
7.54419	4.5404	2.07	48.9558	152.219	0	1
7.5545	2.48499	1.13293	49.9573	166.505	0	1
7.67853	3.13916	1.43117	52.1446	159.812	0	1
6.01884	2.91438	1.32869	46.9983	142.561	0	1
6.4377	3.62833	1.65418	50.4196	140.985	0	1
7.56663	5.08342	2.31757	51.5298	138.95	0	1
7.34103	1.67436	0.763352	77.1538	129.756	0	1
7.18817	9.06586	4.13319	51.0565	128.528	0	1
8.85667	3.42888	1.56325	57.954	119.546	0	1
9.84435	4.48666	2.0455	57.8545	106.133	0	1
7.04103	5.93787	2.70712	52.3857	143.237	0	1
7.03831	2.67816	1.22099	43.9093	129.247	0	1
6.67893	8.72074	3.97585	51.0184	133.757	0	1
8.70862	16.6466	7.58928	55.2121	118.276	0	1
12.1063	14.4024	6.56617	75.2127	87.6712	0	1
7.07378	9.99215	4.55549	47.5275	128.527	0	1
8.99097	4.92076	2.24341	58.2407	109.745	0	1
6.80201	8.55377	3.89973	52.7005	121.194	0	1
7.29712	5.8233	2.65488	53.4699	127.617	0	1
7.17342	13.2703	6.05001	57.7883	107.279	0	1
7.62125	12.9446	5.90152	59.0901	120.397	0	1
7.29066	9.1436	4.16863	56.6488	122.831	0	1
7.88675	4.52152	2.06139	59.1823	97.2245	0	1
6.25744	5.10863	2.32906	43.0967	105.087	0	1
8.38213	9.64715	4.39821	56.5809	113.034	0	1
6.84526	17.2379	7.8589	48.5725	101.118	0	1
8.86444	8.89885	4.05705	57.609	95.3517	0	1
8.15884	10.2141	4.65668	54.8122	104.234	0	1
10.9771	24.6967	11.2594	53.5338	57.1817	0	1
7.91075	17.6917	8.06577	53.5112	104.194	0	1
9.29977	13.0741	5.96057	62.5845	86.6226	0	1
10.6349	36.9891	16.8636	57.8222	61.8108	0	1
10.5056	25.5086	11.6296	58.5015	70.9191	0	1
10.6106	14.6839	6.69449	69.8269	86.9397	0	1
9.08969	12.834	5.85112	54.0107	99.1507	0	1
8.0775	28.789	13.1251	49.4747	78.1445	0	1
7.48856	27.8056	12.6768	50.866	85.3752	0	1
11.1227	24.3604	11.1061	57.5159	62.7095	0	1
11.288	26.1886	11.9396	58.4914	53.5281	0	1
8.75	16.8333	7.67444	50.6333	87.7925	0	1
7.18172	29.8341	13.6016	49.9142	79.6283	0	1
8.59801	19.4206	8.85399	55.4392	77.8786	0	1
7.41158	32.1049	14.6368	48.2081	70.3471	0	1
9.58104	44.3363	20.2132	56.9636	62.8448	0	1
7.29966	18.5822	8.47176	57.6815	64.3499	0	1
10.0487	29.2665	13.3428	57.0774	66.783	0	1
11.4242	62.6725	28.5728	60.4215	66.273	0	1
10.3757	13.0413	5.94561	96.8165	37.2017	0	1
12.0824	39.8966	18.1892	63.8595	69.6004	0	1
12.1355	25.9363	11.8245	55.5724	65.1462	0	1
10.137	62.5084	28.498	59.2788	47.0774	0	1
8.77169	31.0913	14.1748	81.7717	40.3456	0	1
14.593	48.9032	22.2953	59.6551	29.5017	0	1
11.969	74.9942	34.1904	52.7946	25.2105	0	1
12.8989	98.7911	45.0396	67.3633	20.8096	0	1
11.2199	64.3672	29.3455	54.6806	22.0791	0	1
11.0258	37.674	17.1758	82.8489	29.7689	0	1
10.1324	20.1092	9.16795	86.1523	1.52053	0	1
18.3991	79.2982	36.1526	72.5206	18.4009	0	1
18.2976	106.065	48.3557	79.9445	27.674	0	1
14.1681	82.8038	37.7508	57.8852	11.3021	0	1
15.6129	64.6273	29.4641	54.7094	0.760263	0	1
6.95321	1.56257	0.712386	48.9499	203.105	0	1
6.26542	1.27477	0.581175	46.8785	207.223	0	1
6.88455	1.90828	0.869997	42.1223	175.689	0	1
8.00598	1.71713	0.782853	68.5777	145.274	0	1
7.57728	2.14286	0.976944	53.6874	173.156	0	1
6.28951	2.72061	1.24034	44.8508	159.634	0	1
6.79808	2.25962	1.03018	45.3089	163.441	0	1
7.77617	1.91095	0.871216	51.1227	169.44	0	1
7.61779	1.98622	0.90553	81.2469	137.928	0	1
6.62029	1.79584	0.818736	85.3745	168.158	0	1
6.67558	3.24651	1.48011	48.8419	152.896	0	1
7.74163	1.90909	0.870368	86.9569	127.745	0	1
7.93301	2.05024	0.934719	80.9139	124.741	0	1
6.90492	4.49836	2.05084	46.3432	140.434	0	1
6.93226	4.24569	1.93564	48.2755	134.493	0	1
5.98726	2.72611	1.24286	72.8503	148.565	0	1
6.69803	4.52809	2.06439	56.4438	150.334	0	1
7.07972	7.63545	3.48106	48.9358	143.762	0	1
7.58333	5.44749	2.48355	53.5377	130.099	0	1
6.57611	3.71098	1.69186	51.8516	128.958	0	1
8.4406	3.65564	1.66663	53.8271	136.189	0	1
6.58137	7.08137	3.22845	48.2955	121.498	0	1
6.62946	2.51786	1.14791	65.7121	127.569	0	1
7.30717	2.78924	1.27163	67.0538	122.871	0	1
7.96699	4.16505	1.89888	58.7689	111.455	0	1
7.11895	4.29637	1.95875	80.6472	77.7619	0	1
7.4465	13.2783	6.05367	46.5947	103.799	0	1
5.93064	10.1127	4.61046	40.2283	100.666	0	1
7.68492	9.20868	4.1983	50.9153	108.273	0	1
8.42857	5.41768	2.46996	58.1077	102.179	0	1
7.3315	15.2687	6.96112	48.9053	94.5628	0	1
7.32593	12.8516	5.85915	52.3984	110.914	0	1
6.87681	16.2029	7.38702	49.2116	99.6989	0	1
7.90764	8.48276	3.86735	52.8337	106.541	0	1
8.22166	9.43567	4.30179	56.3325	108.311	0	1
7.45241	23.5111	10.7189	55.5632	89.7252	0	1
8.36415	10.1878	4.64468	69.5064	99.2596	0	1
12.0628	40.943	18.6662	68.4128	60.9397	0	1
7.94577	14.8449	6.7679	49.9881	89.484	0	1
7.05048	8.9351	4.07358	79.2596	98.3917	0	1
8.38561	17.5071	7.9816	47.8915	98.3165	0	1
9.53041	13.4651	6.13883	52.5113	72.4232	0	1
7.75223	12.0243	5.48195	49.2465	91.6059	0	1
8.40153	28.1783	12.8467	53.9519	74.3722	0	1
7.55305	29.9142	13.6381	58.5282	84.8121	0	1
7.98996	22.3099	10.1713	51.611	70.3019	0	1
9.23295	20.1761	9.19845	43.9307	61.4582	0	1
8.77934	39.8232	18.1557	53.5086	61.6817	0	1
9.967	51.7791	23.6064	62.5667	63.0496	0	1
10.824	32.8896	14.9946	64.0646	58.976	0	1
8.86398	23.7657	10.835	53.8451	63.2217	0	1
11.1379	33.9409	15.4739	53.4758	45.1599	0	1
13.4723	38.6877	17.638	57.5176	36.4926	0	1
12.9565	36.1957	16.5019	54.3995	43.2242	0	1
10.593	62.4389	28.4663	57.3443	32.601	0	1
10.0661	61.0357	27.8266	62.1804	40.7376	0	1
9.30324	31.1921	14.2207	93.6366	34.5615	0	1
10.5652	46.7077	21.2944	56.0509	45.4444	0	1
11.3467	72.4846	33.0463	59.3092	39.7509	0	1
13.0957	80.4901	36.696	65.6231	43.0607	0	1
9.7541	60.9046	27.7669	51.7511	32.901	0	1
14.9331	53.0054	24.1655	57.822	31.8259	0	1
16.5234	64.3117	29.3202	60.0688	34.1086	0	1
13.4764	54.8535	25.0081	50.8443	5.32184	0	1
12.2755	75.4032	34.3769	50.668	18.7278	0	1
14.7193	83.8126	38.2108	69.8015	20.5496	0	1
15.3993	86.3137	39.3511	69.865	10.7517	0	1
18.1311	80.405	36.6572	64.5439	3.80132	0	1
16.6735	71.6	32.643	65.1578	8.41114	0	1
7.33898	1.59713	0.728144	49.1591	204.837	0	1
5.54681	1.12553	0.513138	45.7426	190.408	0	1
6.55435	1.29783	0.591688	56.3217	196.527	0	1
7.67286	1.50929	0.688098	48.7268	166.499	0	1
7.80357	1.91369	0.872465	51.9077	190.391	0	1
6.86677	1.49701	0.682496	38.8263	193.456	0	1
6.82895	1.54511	0.704428	47.7274	194.195	0	1
6.67497	1.75991	0.802356	44.8732	179.531	0	1
6.5938	1.71196	0.780497	44.8538	179.781	0	1
7.16931	1.53465	0.69966	46.005	183.996	0	1
7.8145	1.37943	0.628891	45.4047	170.153	0	1
8.20534	1.90999	0.870776	52.7046	184.468	0	1
7.28	1.42667	0.650428	71.3089	179.911	0	1
8.52681	1.78686	0.814644	58.1327	154.657	0	1
7.19573	2.36783	1.07951	48.2846	167.523	0	1
7.26194	2.34516	1.06917	52.6767	174.49	0	1
7.98789	2.1642	0.986674	51.3782	172.243	0	1
7.83548	2.74293	1.25052	50.9113	156.753	0	1
6.93452	3.17381	1.44696	48.9012	156.56	0	1
9.91349	4.69211	2.13917	60.6374	133.981	0	1
6.88089	2.88834	1.31681	45.9256	148.497	0	1
6.88305	2.38814	1.08877	47.4915	147.393	0	1
7.60649	4.37189	1.99318	49.9784	154.47	0	1
6.98673	1.73746	0.792122	85.5826	149.339	0	1
7.33859	2.78155	1.26813	53.6869	159.729	0	1
8.69515	2.40874	1.09816	54.7184	128.864	0	1
7.83417	3.43551	1.56627	53.5745	140.506	0	1
7.5657	3.0249	1.37907	51.6293	148.145	0	1
8.0189	3.84688	1.75382	58.2968	142.413	0	1
7.83306	2.6072	1.18864	51.1718	120.706	0	1
8.44154	3.81981	1.74148	61.3618	128.337	0	1
7.3254	7.61706	3.47267	47.8175	113.144	0	1
6.5641	11.9006	5.42559	42.6522	111.711	0	1
7.32314	8.51064	3.88006	59.746	113.804	0	1
9.04514	8.15972	3.72008	53.1806	120.92	0	1
7.44462	4.67846	2.13294	49.3477	128.565	0	1
10.2236	9.99874	4.5585	58.6369	84.485	0	1
7.58929	7.43929	3.39162	52.8125	113.511	0	1
7.48382	5.48536	2.50082	52.1294	122.412	0	1
7.75983	2.76685	1.26143	101.997	105.996	0	1
8.78282	5.71838	2.60705	61.2697	115.474	0	1
9.18591	6.08219	2.77292	80.6575	70.9428	0	1
8.89253	8.96493	4.08718	57.7534	112.397	0	1
7.96205	25.1004	11.4435	43.9788	88.4843	0	1
7.00979	25.8999	11.8079	57.8411	89.8559	0	1
8.89848	21.7636	9.9222	56.0121	74.8657	0	1
7.34464	22.6391	10.3213	50.825	72.7203	0	1
8.07434	13.5971	6.19903	49.5072	80.3156	0	1
8.09091	35.8148	16.3282	54.6795	64.2609	0	1
8.64207	24.7943	11.3039	56.4804	63.8956	0	1
9.59467	23.7426	10.8244	54.8476	72.4926	0	1
9.50309	22.3225	10.177	62.4012	75.8474	0	1
11.7489	28.2278	12.8693	59.4399	49.2167	0	1
10.1631	48.7764	22.2375	67.2447	65.1985	0	1
7.99905	48.353	22.0445	49.7735	50.3958	0	1
9.41065	54.3179	24.7639	58.4038	49.6959	0	1
11.3622	32.0898	14.63	55.2214	53.5195	0	1
13.8521	60.4817	27.574	69.1545	16.9762	0	1
12.5516	50.1865	22.8804	54.9696	19.7229	0	1
8.97719	25.4649	11.6096	82.2561	24.5225	0	1
12.1395	51.5721	23.5121	52.0419	33.7612	0	1
13.1169	82.2735	37.5091	55.7954	17.6702	0	1
17.747	86.4241	39.4014	70.6373	27.4559	0	1
13.1747	50.6638	23.098	91.1703	4.77213	0	1
15.5655	63.2713	28.8459	59.0442	17.2364	0	1
17.6512	90.8343	41.412	69.8503	11.2663	0	1
7.1753	1.57769	0.71928	49.1129	200.506	0	1
6.05769	1.2028	0.548364	37.8409	191.796	0	1
7.73793	1.62414	0.740456	49.5483	202.554	0	1
7.50838	1.67458	0.763454	40.6117	181.989	0	1
8.13333	1.83795	0.837934	52.641	175.38	0	1
6.74742	1.98325	0.904177	42.1972	184.399	0	1
7.42857	2.17822	0.993065	52.2334	195.959	0	1
5.87713	2.95463	1.34704	44.2798	153.883	0	1
8.70736	2.6529	1.20948	57.9755	144.883	0	1
8.60213	3.1098	1.41778	53.4298	164.071	0	1
7.43782	3.82487	1.74379	53.1739	147.428	0	1
6.99201	3.76598	1.71694	54.4954	157.69	0	1
8.44874	4.42199	2.01602	62.4398	152.451	0	1
7.46095	3.53139	1.60999	65.441	149.872	0	1
7.69035	4.18944	1.90999	48.4226	139.551	0	1
6.97176	4.34353	1.98025	45.2176	131.561	0	1
7.41623	3.22046	1.46823	52.3157	142.744	0	1
10.2677	3.23732	1.47592	58.14	127.117	0	1
6.95351	4.69728	2.14152	51.4592	139.71	0	1
8.32902	5.57642	2.54233	47.2513	139.558	0	1
7.19907	8.1633	3.72171	45.1166	121.388	0	1
7.36461	7.0694	3.22299	46.52	121.709	0	1
8.08321	5.96285	2.71851	52.104	138.923	0	1
7.96085	7.62192	3.47489	51.1946	131.894	0	1
6.96434	9.87918	4.50399	54.5575	129.152	0	1
10.7637	12.239	5.57983	62.0272	81.7281	0	1
7.80652	10.5826	4.82469	52.9935	124.012	0	1
6.72197	9.42152	4.29534	64.9596	104.941	0	1
6.68567	11.2357	5.12246	43.8906	96.8905	0	1
6.83362	2.86308	1.3053	69.818	89.4982	0	1
7.05006	19.3126	8.80474	58.3004	95.9222	0	1
7.56194	18.3813	8.38018	62.7239	103.003	0	1
7.31079	24.2475	11.0546	55.1957	84.5787	0	1
8.46984	32.8817	14.991	57.1601	78.6724	0	1
8.4973	13.8181	6.29975	54.1523	90.2538	0	1
12.9339	38.0601	17.3519	61.1611	33.708	0	1
8.44939	22.1758	10.1101	52.4839	71.0828	0	1
12.3597	37.085	16.9073	57.1746	34.1171	0	1
10.5104	49.2796	22.4669	60.2865	66.5992	0	1
13.4326	54.524	24.8579	63.5228	20.5271	0	1
10.8263	40.2874	18.3673	54.3287	43.7914	0	1
9.45465	35.8783	16.3572	50.6234	52.6835	0	1
12.8537	68.6007	31.2755	59.8042	6.35172	0	1
9.41345	60.6824	27.6655	51.4756	44.3684	0	1
9.49097	77.3267	35.2538	56.1227	47.5465	0	1
12.3153	67.9086	30.96	61.93	6.84237	0	1
11.5736	51.8072	23.6193	58.0537	43.2976	0	1
14.4458	92.5595	42.1986	69.328	17.122	0	1
14.2925	62.7563	28.611	66.0517	19.5788	0	1
14.667	85.7087	39.0752	62.1766	25.8936	0	1
13.6527	71.4817	32.589	55.9674	12.635	0	1
14.9415	83.2754	37.9659	62.0595	18.278	0	1
16.4775	73.2684	33.4036	57.8391	18.6722	0	1
12.2924	20.3811	9.2919	103.172	5.60742	0	1
6.38365	1.29245	0.589239	39.6101	206.713	0	1
7.73754	2.26246	1.03147	46.6188	190.155	0	1
6.98361	1.78324	0.812993	45.9162	207.743	0	1
8.33432	1.96024	0.893686	94.2504	155.616	0	1
7.20037	1.2603	0.57458	51.4232	188.438	0	1
7.0827	1.7659	0.805088	50.9097	195.174	0	1
7.38983	1.82415	0.831644	50.3665	167.231	0	1
6.72953	1.87792	0.856159	47.7814	168.418	0	1
8.32864	2.96244	1.3506	52.1221	173.057	0	1
6.78395	2.02469	0.923072	48.1049	155.969	0	1
6.77618	1.51335	0.689946	90.5585	158.182	0	1
8.04865	2.90405	1.32398	53.3541	170.846	0	1
8.40714	7.26277	3.31115	57.5556	154.122	0	1
8.87397	7.86574	3.58605	60.7492	149.496	0	1
7.36706	5.24435	2.39094	48.7212	133.258	0	1
7.82567	3.31379	1.51078	52.5151	134.953	0	1
8.08169	6.96056	3.17337	50.6507	141.9	0	1
6.47665	2.1537	0.981886	62.9339	132.353	0	1
6.60486	11.0959	5.05871	41.6816	119.561	0	1
9.1614	10.2105	4.65505	58.9333	74.145	0	1
10.3703	15.522	7.07658	64.0451	81.2038	0	1
10.1814	17.6962	8.06781	63.6219	73.1379	0	1
7.77962	6.42038	2.9271	54.8089	100.709	0	1
11.2203	21.5914	9.84368	63.837	66.1473	0	1
8.9974	8.82445	4.02313	60.9688	107.165	0	1
7.74608	17.7833	8.10755	48.3549	92.4656	0	1
10.114	18.2252	8.30902	52.0719	61.3933	0	1
8.90151	8.45191	3.85329	55.5991	89.7452	0	1
7.58245	13.0199	5.93589	49.9415	98.4504	0	1
9.456	13.8613	6.31948	56.0547	79.7675	0	1
8.064	13.873	6.3248	54.613	84.3639	0	1
9.65464	22.8119	10.4001	52.6933	60.3603	0	1
10.4923	17.9205	8.1701	56.1954	70.3866	0	1
8.49416	17.1834	7.83404	49.3984	69.7671	0	1
10.4129	31.715	14.4591	53.6464	53.6662	0	1
9.27283	40.466	18.4488	50.1054	74.8811	0	1
7.39351	42.9391	19.5763	41.0842	58.1599	0	1
9.56323	61.0164	27.8178	50.9859	57.4761	0	1
11.7603	57.233	26.093	48.6705	22.4426	0	1
7.47205	50.972	23.2385	48.7034	50.0366	0	1
9.50962	75.2853	34.3231	49.8024	49.9788	0	1
11.4112	81.8698	37.325	59.5888	46.0157	0	1
10.3629	59.3489	27.0576	50.0813	34.9423	0	1
12.8504	73.9708	33.7238	57.0018	37.8501	0	1
10.0165	79.8778	36.4169	56.7427	40.5342	0	1
10.0907	83.9979	38.2952	69.5591	33.4861	0	1
9.68814	70.9297	32.3374	49.8814	26.0627	0	1
12.9241	59.5609	27.1542	50.606	24.9037	0	1
13.6258	55.0444	25.0952	63.4791	10.5619	0	1
5.21338	0.732369	0.333892	43.2061	187.682	0	1
6.36911	1.68455	0.768001	46.6584	199.643	0	1
5.62487	0.942122	0.42952	54.9796	185.473	0	1
5.57627	1.11653	0.509032	50.5297	183.993	0	1
8.53425	1.91194	0.871666	51.4442	172.426	0	1
6.6685	1.76211	0.803361	42.6233	171.557	0	1
7.49229	4.36062	1.98804	47.2764	177.212	0	1
7.41505	2.78065	1.26772	56.0215	183.963	0	1
6.76267	2.29467	1.04616	43.8907	161.595	0	1
6.96137	3.58057	1.63241	46.7605	153.963	0	1
6.84362	2.77263	1.26406	41.5761	145.896	0	1
8.18373	4.16142	1.89722	52.7375	161.596	0	1
7.36987	5.90781	2.69342	50.8628	147.582	0	1
8.70992	9.53903	4.34891	56.4335	130.951	0	1
6.82297	10.2	4.65025	44.7311	110.853	0	1
7.8032	7.50458	3.42139	52.46	130.493	0	1
8.52625	6.44686	2.93917	56.4149	121.056	0	1
7.32723	6.60183	3.00982	86.3066	72.7711	0	1
6.73871	22.7223	10.3593	47.0055	97.6084	0	1
7.26589	6.63545	3.02515	66.8712	67.9047	0	1
8.11558	34.3879	15.6777	49.2874	69.7994	0	1
7.30971	41.6469	18.9871	45.8297	71.6199	0	1
8	35.0549	15.9818	45.0026	77.0593	0	1
11.1132	28.025	12.7768	45.8672	32.6913	0	1
7.98795	38.3538	17.4858	41.7163	60.2146	0	1
12.7846	72.896	33.2338	58.7258	13.4117	0	1
15.118	44.7817	20.4163	77.4349	49.7946	0	1
14.3294	76.2856	34.7791	59.3587	13.2295	0	1
10.8802	59.6455	27.1928	50.5916	39.0926	0	1
12.3737	88.1199	40.1745	53.554	27.674	0	1
9.70408	68.8857	31.4055	46.9561	23.2422	0	1
10.3744	70.0724	31.9465	52.6533	37.0288	0	1
13.3563	72.2996	32.9619	55.9818	5.57642	0	1
12.2214	29.5382	13.4667	54.6832	20.8761	0	1
13.7882	74.742	34.0754	49.787	8.06022	0	1
14.5606	108.456	49.4457	60.0653	2.06814	0	1
13.7261	118.467	54.0098	69.578	4.3007	0	1
10.963	24.7348	11.2768	52.48	6.12944	0	1
9.13885	3.25666	1.48474	60.244	193.25	0	1
7.56689	1.85488	0.845651	81.3296	158.753	0	1
9.08199	9.37621	4.27468	89.5868	125.869	0	1
8.4679	5.90123	2.69042	58.2753	158.163	0	1
7.79433	5.64539	2.57377	46.4492	158.836	0	1
10.6454	5.80679	2.64736	66.4459	152.476	0	1
7.79111	7.45398	3.39832	50.1375	144.18	0	1
9.82481	8.3491	3.80642	56.578	83.3416	0	1
8.29752	9.44628	4.30663	48.4504	115.077	0	1
7.82149	3.55113	1.61898	63.9619	96.1888	0	1
8.92108	6.47664	2.95275	69.297	102.006	0	1
8.7021	14.6347	6.67208	50.9596	97.196	0	1
8.07353	4.29412	1.95772	86.3578	88.0449	0	1
6.0207	25.5828	11.6634	45.744	88.4843	0	1
7.69929	14.5816	6.64784	52.7957	82.466	0	1
9.81403	17.0425	7.7698	56.7779	71.6174	0	1
8.25641	39.6706	18.0861	48.5335	68.9094	0	1
10.7347	23.9749	10.9303	60.7456	61.586	0	1
9.6116	31.6995	14.452	58.0123	57.0755	0	1
9.73242	85.9511	39.1857	48.0657	50.636	0	1
9.81626	65.8358	30.015	61.2537	29.7379	0	1
10.911	83.1191	37.8946	59.7757	46.7027	0	1
11.7963	82.7498	37.7262	56.0204	18.4886	0	1
11.6085	98.4735	44.8948	60.4312	33.1217	0	1
10.7621	72.7193	33.1532	47.0902	19.8048	0	1
15.0633	66.1519	30.1591	60.6519	7.20447	0	1
5.40482	0.850602	0.387796	50.0988	190.571	0	1
7.32723	2.65217	1.20915	49.2449	162.328	0	1
6.38247	4.01726	1.8315	79.6667	143.498	0	1
10.8195	7.90909	3.60581	60.3342	139.439	0	1
8.36568	19.2178	8.76151	48.1408	100.042	0	1
7.4192	2.99766	1.36665	74.9578	90.0698	0	1
6.87779	21.9961	10.0282	44.8949	97.0853	0	1
8.05352	32.6296	14.8761	48.6901	81.405	0	1
11.3466	48.1788	21.9651	56.0695	35.3943	0	1
10.8908	73.5236	33.52	52.6678	31.2541	0	1
9.62282	83.1327	37.9008	51.1269	41.4145	0	1
15.328	102.126	46.56	66.1998	7.00928	0	1
8.33333	2.51829	1.14811	54.0488	199.65	0	1
8.65979	2.91753	1.33012	60.5739	156.845	0	1
8.38981	4.32464	1.97164	93.2133	85.7373	0	1
13.2903	40.5235	18.4749	85.283	52.3997	0	1
9.59414	19.0957	8.70586	53.2886	89.1325	0	1
9.49	78.656	35.8598	48.78	49.7563	0	1
11.046	82.9556	37.82	48.9333	56.7556	0	1
13.8657	29.716	13.5477	65.7797	48.3231	0	1
12.1719	95.8103	43.6806	72.2221	7.27632	0	1
12.2727	84.1404	38.3602	52.9626	30.715	0	1
9.20022	72.2478	32.9383	47.2301	28.6892	0	1
10.2847	66.4164	30.2797	49.4555	33.9745	0	1
10.9396	18.9712	8.64913	52.7085	7.42571	0	1
7.81633	1.64706	0.750906	76.4682	172.908	0	1
6.90337	43.2876	19.7352	46.9483	89.4013	0	1
11.9656	101.918	46.4651	62.8267	16.6009	0	1
14.277	27.0466	12.3308	58.0262	15.1786	0	1
8.17898	1.84565	0.841445	65.9737	177.099	0	1
9.13673	8.32959	3.79752	74.6582	172.023	0	1
7.35147	9.51814	4.33939	79.7483	162.945	0	1
7.54649	14.4841	6.60342	79.8583	92.2246	0	1
8.49609	7.91667	3.60927	64.224	116.668	0	1
6.5665	10.6564	4.85833	66.8744	85.6807	0	1
7.93363	20.8086	9.48681	79.5	34.0815	0	1
9.69811	20.8818	9.52015	60.8151	43.9666	0	1
10.3315	84.0056	38.2988	55.6364	24.1472	0	1
12.374	31.5325	14.3759	75.4906	16.8806	0	1
8.57674	12.007	5.47407	51.4116	82.3285	0	1
6.96262	6.16449	2.81043	54.4542	61.4611	0	1
11.6396	22.5132	10.2639	80.2283	53.3811	0	1
9.43722	20.475	9.33472	80.6157	50.7774	0	1
6.8764	14.8247	6.7587	77.1169	29.0297	0	1
7.42193	10.0483	4.58111	52.0892	52.3037	0	1
10.6785	47.6109	21.7062	76.2337	7.07494	0	1
9.44619	60.8924	27.7613	57.2598	36.2909	0	1
86.7684	59.7991	19.5384	51.8419	26.5505	1	2
181.36	24.3748	7.96408	64.4604	38.8077	1	2
70.342	54.7049	17.874	46.6561	32.1619	1	2
197.267	80.6641	26.3557	56.6883	15.2053	1	2
211.146	60.3852	19.7299	52.2214	15.7505	1	2
185.821	77.5474	25.3374	48.0155	9.7894	1	2
89.6294	87.3381	28.5363	54.8843	21.5169	1	2
182.223	64.6436	21.1213	54.7402	52.9102	1	2
86.1013	79.3493	25.9261	51	11.6198	1	2
85.8126	5.98379	1.95511	62.0992	103.12	1	2
125.226	28.8903	9.43944	80.7346	13.689	1	2
95.3546	74.6495	24.3905	46.8058	38.1407	1	2
205.571	20.2387	6.61268	61.1219	37.0101	1	2
26.6966	64.6225	21.1144	53.4787	3.9796	1	2
86.5611	89.5366	29.2547	50.2168	26.8083	1	2
31.0877	81.3781	26.589	52.5	29.9451	1	2
99.1349	53.0242	17.3248	48.2445	37.605	1	2
128.662	67.2963	21.988	51.036	6.54003	1	2
72.5683	83.8222	27.3876	60.7158	7.09941	1	2
166.655	25.9476	8.47798	74.875	39.459	1	2
196.28	91.0307	29.7428	57.9135	50.0112	1	2
45.3398	69.3014	22.6431	52.1828	24.1615	1	2
91.9892	86.1036	28.133	53.4964	8.6014	1	2
134.481	55.7969	18.2307	54.0914	29.1945	1	2
160.139	32.5115	10.6226	45.5013	70.4137	1	2
92.2403	92.6406	30.2688	48.2597	10.7356	1	2
74.3595	77.0071	25.1609	59.0071	39.5117	1	2
92.8882	99.3452	32.4595	55.5422	16.4118	1	2
166.537	30.7317	10.0411	47.1093	60.1185	1	2
175.377	20.1883	6.59622	73.0179	48.5534	1	2
99.9571	69.9898	22.8681	47.4712	32.6559	1	2
112.771	88.0153	28.7576	55.9643	19.4038	1	2
91.3588	86.2661	28.1861	52.1178	20.6982	1	2
91.6039	81.4538	26.6137	57.6986	19.4722	1	2
113.299	93.209	30.4546	52.3817	31.0798	1	2
81.1824	78.7431	25.7281	48.6333	24.0079	1	2
78.9291	80.4898	26.2988	48.9925	14.2719	1	2
170.926	34.4768	11.2648	48.4059	46.4309	1	2
160.752	116.215	37.9713	52.2276	26.005	1	2
10.7664	2.257	0.737437	52.494	138.029	0	2
7.81075	2.98248	0.974477	49.5678	104.156	0	2
7.92358	1.75328	0.572855	67.1266	196.305	0	2
7.80995	1.51357	0.494536	66.8303	195.921	0	2
13.4389	33.2494	10.8637	95.4408	55.6147	0	2
10.6585	4.03902	1.31969	52.1742	132.227	0	2
10.1928	2.66787	0.871685	97.8118	197.064	0	2
10.4114	3.41136	1.11461	61.9391	176.221	0	2
12.3926	5.17228	1.68996	65.9763	158.938	0	2
10.4457	5.70648	1.8645	89.5741	134.504	0	2
13.1644	17.245	5.63452	81.1477	90.5403	0	2
14.6589	8.67959	2.83592	90.1938	112.594	0	2
9.10783	2.99304	0.977929	79.2209	157.86	0	2
14.3395	21.3344	6.97067	95.1653	71.4178	0	2
8.50097	2.49126	0.81398	84.0291	162.742	0	2
9.56897	1.86207	0.608401	38.9885	171.701	0	2
8.62044	1.66423	0.543762	40.253	170.628	0	2
9.58306	2.49349	0.814707	41.8306	125.306	0	2
9.27719	2.52878	0.82624	64.1258	92.6898	0	2
9.39711	2.60289	0.850452	66.926	79.4939	0	2
10.7239	49.3369	16.12	62.7398	22.0188	0	2
8.00965	20.0193	6.54098	46.918	37.8501	0	2
9.05834	4.13069	1.34964	87.7281	66.3	0	2
9.12353	2.28235	0.745722	62.3804	98.2971	0	2
8.30714	1.225	0.400249	45.6536	172.016	0	2
10.9221	4.47908	1.46347	59.0851	107.744	0	2
9.22588	2.20706	0.721121	70.08	113.819	0	2
10.9186	2.71705	0.887754	51.438	159.489	0	2
10.2111	4.58478	1.498	108.836	80.0972	0	2
11.2026	2.37322	0.775413	47.3365	178.213	0	2
11.4344	25.3225	8.27372	85.9314	29.7689	0	2
10.5257	6.64653	2.17165	49.2121	75.868	0	2
8.87986	6.49117	2.12088	71.5212	65.2809	0	2
11.5889	2.3542	0.769196	48.3656	163.088	0	2
12.3942	42.1667	13.7773	72.3273	39.9424	0	2
13.893	60.0043	19.6055	58.5061	25.4841	0	2
13.3821	6.95401	2.27211	65.9304	105.469	0	2
12.4892	2.96228	0.967879	56.6918	135.484	0	2
10.5319	2.85124	0.931597	55.2863	153.006	0	2
12.162	2.61117	0.853159	53.4	169.497	0	2
8.92654	1.77361	0.5795	70.5397	183.637	0	2
13.5459	10.1483	3.31579	68.5459	101.089	0	2
9.01724	1.80388	0.589389	73.4246	177.09	0	2
8.54208	2.02475	0.661556	81.9307	190.499	0	2
10.2693	18.1423	5.9277	56.5401	81.3517	0	2
13.4806	39.1903	12.8048	55.5613	32.3	0	2
9.43463	2.70848	0.884953	56.7951	143.828	0	2
13.1035	4.18944	1.36883	63.7329	153.766	0	2
13.626	8.58015	2.80343	67.4057	122.227	0	2
14.1012	21.8541	7.14048	74.7494	88.2593	0	2
11.3819	8.45403	2.76222	54.9901	108.024	0	2
11.7456	4.38769	1.43361	59.3313	176.259	0	2
14.2353	18.1103	5.91725	72.8958	98.8862	0	2
12.3024	6.11955	1.99947	65.097	148.586	0	2
13.274	7.05354	2.30463	71.0945	138.461	0	2
12.1437	12.0837	3.94816	61.4762	118.175	0	2
9.48661	4.2315	1.38257	53.5134	149.752	0	2
8.45272	3.18052	1.03918	40.8481	186.399	0	2
9.43972	3.07624	1.00511	76.0904	125.137	0	2
12.7372	6.33046	2.06838	65.7366	138.84	0	2
12.0547	6.71642	2.19448	61.9266	147.375	0	2
10.4541	3.90376	1.27549	49.4331	192.808	0	2
13.5399	21.6711	7.08069	79.4252	100.099	0	2
10.2995	3.18274	1.03991	45.7716	180.781	0	2
13.6178	5.63423	1.8409	65.4033	142.509	0	2
15.4665	78.3577	25.6021	76.3994	37.3598	0	2
8.03596	3.19779	1.04483	40.3029	197.273	0	2
12.1224	50.0913	16.3665	64.9896	57.315	0	2
15.08	15.0681	4.92326	70.583	98.7388	0	2
14.0591	9.64664	3.15189	70.0815	119.157	0	2
13.0958	6.52467	2.13183	63.8624	138.862	0	2
12.8403	28.056	9.16686	69.5756	77.2429	0	2
11.5226	4.45846	1.45673	61.6246	170.622	0	2
9.92082	3.98534	1.30215	51.6246	159.157	0	2
16.8415	19.2698	6.2961	103.793	104.502	0	2
13.8697	9.48882	3.10032	77.1211	125.633	0	2
12.9085	11.183	3.65386	57.0532	111.072	0	2
12.2026	6.19331	2.02356	59.5428	144.011	0	2
14.1826	15.5471	5.07978	79.0492	117.359	0	2
14.1401	11.7565	3.84124	70.3297	124.596	0	2
11.2531	5.59219	1.82716	54.7828	146.805	0	2
15.5519	22.5918	7.3815	79.9309	97.561	0	2
15.935	20.1262	6.57593	83.5279	109.441	0	2
12.9885	9.61656	3.14206	77.0051	136.002	0	2
13.7579	4.68693	1.53138	80.9352	146.698	0	2
12.7562	11.8017	3.856	62.6508	74.2143	0	2
10.1592	2.73885	0.894877	63.3439	118.09	0	2
9.38944	8.09901	2.64622	50.8277	63.7434	0	2
9.39823	2.81947	0.921217	46.6088	88.8396	0	2
12.9568	44.1706	14.4321	60.4755	27.6259	0	2
10.2395	2.93488	0.958926	75.9605	83.6994	0	2
11.5838	34.5858	11.3004	57.9563	43.7161	0	2
13.9593	52.0868	17.0185	49.9956	23.8316	0	2
11.5914	3.2929	1.0759	57.8851	125.678	0	2
10.4473	6.89032	2.2513	78.271	68.3468	0	2
11.3142	8.27894	2.70501	55.6307	94.2984	0	2
11.9917	2.52241	0.824156	54.8267	146.186	0	2
11.2687	3.40174	1.11146	50.2488	160.499	0	2
10.3175	3.1162	1.01817	49.8429	155.63	0	2
12.5326	8.98956	2.93719	60.2983	110.299	0	2
10.55	1.98043	0.647075	68.8348	203.269	0	2
11.0037	3.74033	1.22209	46.0258	200.132	0	2
13.283	21.4116	6.99589	97.2015	51.4075	0	2
11.8196	4.54893	1.48629	52.315	128.303	0	2
12.3414	4.29442	1.40313	60.5609	186.773	0	2
12.6743	4.26424	1.39327	69.3998	160.264	0	2
13.8719	74.3719	24.2998	57.0459	22.9393	0	2
13.7375	3.35233	1.09532	54.2383	177.723	0	2
13.2475	15.6675	5.11911	71.5381	93.7932	0	2
10.7705	3.34733	1.09369	78.6926	136.147	0	2
13.3099	14.961	4.88827	66.3651	107.208	0	2
17.441	15.0678	4.92316	88.9809	114.131	0	2
14.8808	71.0562	23.2165	63.7829	36.0079	0	2
12.3649	7.26941	2.37516	85.479	131.013	0	2
13.2953	5.34203	1.74542	60.5838	164.943	0	2
14.2432	9.45411	3.08898	73.1208	122.208	0	2
12.8002	7.55355	2.468	63.0505	151.322	0	2
11.633	64.0878	20.9397	51.6776	28.1729	0	2
11.2851	5.97575	1.95248	67.005	161.428	0	2
11.8576	7.94948	2.59737	56.3571	138.867	0	2
12.5292	6.47402	2.11528	61.2704	157.02	0	2
11.2108	5.5758	1.8218	56.0364	176.076	0	2
10.9695	4.95299	1.61831	47.7408	194.927	0	2
9.1119	22.5262	7.36007	41.5821	42.4251	0	2
10.1953	19.4731	6.36254	47.5544	35.2962	0	2
10.47	10.6234	3.47102	54.6226	87.176	0	2
13.0147	48.9632	15.9979	60.1388	27.3779	0	2
10.4384	2.26465	0.739937	44.0667	125.935	0	2
10.1074	5.20951	1.70212	58.2456	102.748	0	2
12.1545	31.2797	10.2201	54.0732	37.3598	0	2
11.1213	38.8456	12.6922	51.5673	31.8313	0	2
10.1625	3.63417	1.18741	63.9892	97.3879	0	2
10.0293	3.816	1.24682	68.3773	89.5292	0	2
9.23252	1.68211	0.549604	42.2943	177.046	0	2
11.2658	10.069	3.2899	61.3072	64.2636	0	2
11.0143	16.019	5.23397	92.3262	22.6808	0	2
10.1762	3.44266	1.12484	51.8783	124.651	0	2
11.2822	30.1891	9.86381	52.2607	49.1485	0	2
11.2108	3.86885	1.26409	48.8244	133.714	0	2
11.6183	33.6071	10.9806	57.3371	45.3578	0	2
11.2216	5.12743	1.67531	52.4896	106.95	0	2
9.39541	8.44709	2.75995	62.0353	83.1222	0	2
11.0552	3.19387	1.04354	57.2626	143.852	0	2
11.9277	16	5.22774	63.6738	80.0164	0	2
9.52688	2.9543	0.965271	83.0054	135.226	0	2
13.2965	7.83861	2.56114	66.3174	130.44	0	2
12.3681	16.0608	5.24761	62.2772	95.0329	0	2
9.74065	37.4465	12.235	56.991	62.7961	0	2
11.2245	3.08871	1.00919	45.039	192.529	0	2
11.3928	57.5708	18.8103	71.2548	13.6	0	2
11.909	4.20705	1.37459	58.2207	164.187	0	2
13.1521	60.64	19.8131	54.2322	23.8218	0	2
11.0539	3.83055	1.25157	50.0257	172.831	0	2
15.928	61.9989	20.2572	74.6451	56.28	0	2
10.4485	4.09524	1.33805	56.4516	160.591	0	2
13.3945	6.10957	1.99621	66.9123	149.012	0	2
14.2441	22.0301	7.19799	70.5674	93.302	0	2
12.8778	4.56837	1.49264	68.3522	170.518	0	2
11.9835	37.5747	12.2769	62.5396	61.8136	0	2
15.8402	18.0907	5.91085	73.8024	103.074	0	2
12.4826	43.2318	14.1253	64.3082	65.8872	0	2
16.9479	13.6187	4.44968	75.144	107.022	0	2
10.5604	4.02669	1.31566	47.314	190.711	0	2
16.5394	23.5714	7.70159	92.4359	107.989	0	2
13.1785	35.5049	11.6007	65.7258	65.5354	0	2
12.9284	4.50282	1.47123	64.8719	146.83	0	2
12.8925	9.46697	3.09318	77.6713	127.427	0	2
16.4084	9.24531	3.02076	115.452	109.787	0	2
8.4	2.30843	0.754244	76.3494	192.515	0	2
13.0634	7.23716	2.36463	73.4985	96.8958	0	2
13.3911	24.6311	8.04782	67.7304	84.2116	0	2
10.1045	4.29217	1.4024	47.4307	189.334	0	2
10.7012	19.7012	6.43704	64.6694	77.6467	0	2
11.7787	50.862	16.6184	51.3566	33.4861	0	2
8.21559	4.89386	1.59899	54.859	63.5945	0	2
9.82293	10.9245	3.56942	46.1214	76.4153	0	2
8.01844	6.90574	2.25634	79.4201	45.3578	0	2
11.4474	9.51168	3.10779	66.3843	85.3265	0	2
11.0555	5.27746	1.72432	53.289	117.194	0	2
10.25	3.19634	1.04435	50.4031	130.795	0	2
11.1194	7.14829	2.33559	59.269	99.4499	0	2
8.08922	1.63197	0.53322	62.9424	159.539	0	2
8.52941	4.02206	1.31414	74.6379	74.3116	0	2
12.1039	7.72992	2.52563	69.1191	103.905	0	2
10.6836	18.7618	6.13012	76.1091	32.5726	0	2
7.75833	2.1	0.686142	34.1333	201.382	0	2
10.4143	5.6406	1.84298	61.3877	109.023	0	2
10.3163	6.25608	2.04407	60.3252	121.69	0	2
10.9122	3.22979	1.05528	54.418	169.529	0	2
11.1216	3.30272	1.07911	54.674	181.22	0	2
12.3804	7.86828	2.57083	62.9234	106.957	0	2
13.7604	8.96863	2.93036	65.7465	118.121	0	2
8.68226	1.70839	0.558189	33.0358	212.32	0	2
10.9735	21.9364	7.16738	60.4781	83.5723	0	2
11.1368	41.2338	13.4725	51.3458	36.04	0	2
10.5253	5.32491	1.73983	80.1606	112.622	0	2
9.92178	2.84059	0.928119	42.3782	212.62	0	2
10.1238	4.01092	1.3105	47.6226	180.885	0	2
12.6409	5.3447	1.7463	63.1813	146.035	0	2
12.9466	12.5326	4.09481	66.6137	101.154	0	2
10.3187	3.93303	1.28505	84.6166	117.27	0	2
8.22305	3.19703	1.04458	75.3792	110.453	0	2
10.4807	7.10201	2.32047	55.3261	143.508	0	2
9.17602	3.26265	1.06602	40.4796	206.589	0	2
12.9872	54.9288	17.9471	63.7923	46.0119	0	2
11.7736	31.8183	10.3961	68.4964	73.3518	0	2
9.60594	3.55331	1.16099	39.1147	179.573	0	2
11.7335	6.47419	2.11534	61.8679	125.517	0	2
10.1527	3.21967	1.05197	46.0795	194.284	0	2
7.67206	2.80567	0.916707	51.1984	182.471	0	2
11.7357	48.7289	15.9214	56.1834	47.6837	0	2
12.8633	72.1059	23.5594	55.3426	26.6721	0	2
15.7971	27.3559	8.9381	68.2174	94.1855	0	2
13.2859	31.1279	10.1705	68.0302	77.0593	0	2
10.0865	4.3494	1.4211	45.2541	175.649	0	2
12.7319	72.8227	23.7937	49.7989	23.8727	0	2
14.1396	36.3337	11.8715	76.1136	77.2429	0	2
12.4762	10.977	3.58656	71.2718	102.79	0	2
9.67935	4.28028	1.39851	49.1626	178.308	0	2
14.5435	25.5091	8.3347	74.725	81.5391	0	2
16.0509	97.5225	31.8639	74.4206	19.898	0	2
11.0269	4.93663	1.61296	58.9356	168.778	0	2
10.2149	4.54484	1.48495	48.8951	179.035	0	2
11.0909	6.28133	2.05232	55.7039	148.761	0	2
11.7674	9.93235	3.24524	68.5941	133.357	0	2
13.9694	90.9387	29.7128	60.9225	12.635	0	2
12.1478	7.26399	2.37339	56.8723	166.7	0	2
14.5648	22.5899	7.3809	97.2244	102.862	0	2
10.1436	2.92308	0.955069	84.8769	145.938	0	2
12.5617	46.5808	15.2195	55.9345	23.7514	0	2
8.34929	1.46701	0.479323	57.1216	156.775	0	2
12.9079	64.0596	20.9304	57.8382	16.2526	0	2
10.3179	16.4281	5.36764	53.4646	53.6209	0	2
11.926	35.0483	11.4515	52.7318	30.5962	0	2
8.60612	1.77755	0.580786	42.3061	130.455	0	2
11.0277	36.6176	11.9642	51.082	35.2175	0	2
10.5297	24.3487	7.95554	51.4962	42.1394	0	2
9.65084	14.0712	4.59755	53.9782	57.8889	0	2
10.7101	5.83166	1.9054	51.9833	81.8864	0	2
10.2649	3.0627	1.00069	46.6768	134.847	0	2
10.5729	6.19949	2.02558	53.8721	92.0653	0	2
14.2491	87.9155	28.725	57.82	2.58936	0	2
10.4644	12.2497	4.00239	91.8661	30.8408	0	2
9.8694	20.4259	6.67385	57.4513	58.0843	0	2
10.5072	28.6424	9.35845	52.4775	47.6837	0	2
7.92043	16.671	5.44697	79.6473	46.809	0	2
9.78603	2.5765	0.841829	48.6264	202.692	0	2
10.1408	3.42455	1.11892	56.3944	148.63	0	2
7.72072	2.81982	0.921331	61.9257	164.233	0	2
10.5251	47.4591	15.5065	57.198	44.5724	0	2
13.2682	12.8743	4.20646	66.4175	121.69	0	2
12.5098	7.5975	2.48236	64.7096	138.961	0	2
9.8733	3.92916	1.28379	53.2752	189.124	0	2
11.9062	17.5613	5.73787	57.3238	90.5511	0	2
9.42871	2.48499	0.811931	42.5413	200.968	0	2
10.7126	26.6184	8.69712	60	74.0186	0	2
11.7086	61.2477	20.0117	62.4185	60.9464	0	2
11.007	5.62256	1.83708	59.0327	156.738	0	2
10.3198	3.41916	1.11716	48.8048	182.357	0	2
10.575	18.962	6.19552	57.7641	86.5265	0	2
7.21283	1.37715	0.449962	46.1972	193.65	0	2
12.7475	85.2823	27.8646	56.33	13.0801	0	2
12.5233	21.7493	7.10623	67.309	93.909	0	2
14.3458	94.7103	30.9451	66.6273	27.7387	0	2
11.631	23.7116	7.74737	68.9629	71.2168	0	2
10.5314	4.87762	1.59368	49.8309	157.229	0	2
15.202	16.5651	5.41237	74.7869	119.422	0	2
10.5907	5.11922	1.67262	52.0214	160.851	0	2
13.2722	78.7255	25.7223	67.1343	36.4752	0	2
10.7568	4.73234	1.54622	49.6033	154.234	0	2
13.5629	43.2955	14.1461	64.3016	77.9134	0	2
9.58603	3.33416	1.08939	42.7132	180.199	0	2
12.7744	8.83136	2.88551	63.7562	134.926	0	2
11.313	4.59352	1.50086	65.4738	167.059	0	2
12.2088	8.21483	2.68406	62.6657	138.36	0	2
12.6374	79.0089	25.8149	65.6828	34.7882	0	2
12.8531	51.8544	16.9426	77.0204	69.2533	0	2
8.93715	3.9697	1.29704	69.4983	186.654	0	2
12.4077	8.32841	2.72118	85.0443	90.5728	0	2
11.2418	8.04235	2.62771	54.3798	129.95	0	2
8.65811	6.0008	1.96067	58.1236	160.443	0	2
13.6993	83.7228	27.3551	60.2327	23.2596	0	2
10.5373	62.8269	20.5277	54.4061	16.4118	0	2
10.3463	21.9409	7.16885	44.5638	40.9838	0	2
7.72213	3.20926	1.04858	44.6775	81.0178	0	2
9.75388	20.7694	6.78607	46.8554	43.7875	0	2
8.67883	2.80027	0.914942	41.8547	120.112	0	2
9.23489	21.7086	7.09293	54.8801	41.1526	0	2
12.5725	50.6962	16.5642	63.1695	32.9256	0	2
7.3213	1.58324	0.517297	59.7101	129.879	0	2
9.91909	13.6545	4.4614	53.4609	54.4191	0	2
10.3729	6.2205	2.03245	50.9064	103.306	0	2
8.66183	12.7635	4.17027	75.9025	38.766	0	2
11.4107	70.0242	22.8793	47.5469	12.8707	0	2
8.55466	23.0432	7.52899	79.888	1.83096	0	2
10.0424	1.89225	0.618263	38.8184	170.131	0	2
9.50804	27.0584	8.84091	51.5673	43.4575	0	2
9.66556	13.6224	4.45089	55.6645	69.0208	0	2
10.3806	3.1903	1.04238	59.5758	142.743	0	2
9.26918	2.76248	0.902598	40.4531	168.55	0	2
7.7792	1.48358	0.484735	56.2883	180.621	0	2
9.54079	13.6865	4.47184	53.7821	72.5484	0	2
9.27981	12.4866	4.0798	49.354	86.5565	0	2
10.432	3.13816	1.02534	49.1118	148.429	0	2
11.081	4.26937	1.39495	61.1502	143.628	0	2
10.9464	67.9809	22.2117	52.9613	3.74	0	2
8.89264	4.56859	1.49271	80.1113	100.092	0	2
9.33829	2.99314	0.977962	45.136	201.687	0	2
10.4901	4.45446	1.45542	50.3493	155.499	0	2
13.2843	18.6527	6.09446	64.068	107.022	0	2
10.2333	3.60108	1.17659	48.4086	169.141	0	2
12.4002	71.0154	23.2031	55.8564	2.58936	0	2
12.6054	77.3716	25.28	54.4397	21.9425	0	2
10.331	13.2465	4.32808	56.6489	98.1652	0	2
9.76754	7.79934	2.54831	49.4836	124.564	0	2
10.273	5.57406	1.82123	51.2091	157.132	0	2
11.7409	58.956	19.2629	54.928	36.7405	0	2
11.9953	28.5517	9.32882	65.9543	85.9131	0	2
12.1257	85.5146	27.9405	56.4562	4.6245	0	2
7.37269	3.03009	0.990034	57.912	192.206	0	2
11.1788	75.1469	24.5531	49.3793	13.0801	0	2
10.7201	43.1727	14.106	58.746	55.8284	0	2
11.4359	6.47758	2.11645	53.0292	147.975	0	2
9.3474	4.71308	1.53992	61.5457	124.157	0	2
12.6615	11.8303	3.86536	54.4424	141.188	0	2
10.9431	30.3454	9.91486	75.3936	62.2534	0	2
10.9798	5.76009	1.88202	74.0291	127.237	0	2
10.8745	8.21362	2.68367	56.2844	158.06	0	2
11.8798	69.5238	22.7158	50.4739	15.7505	0	2
8.67095	3.04334	0.994362	40.2761	192.115	0	2
10.9604	71.7976	23.4587	50.719	30.7507	0	2
9.22944	5.93506	1.93919	64.6364	151.539	0	2
12.8405	11.15	3.64307	64.5883	130.292	0	2
10.902	5.72053	1.86909	55.2834	158.372	0	2
12.6355	84.7396	27.6873	58.6222	19.4633	0	2
11.4607	16.1372	5.27256	60.8722	114.439	0	2
12.1236	11.1849	3.65448	62.7605	122.778	0	2
12.5111	31.2481	10.2098	60.8547	85.5402	0	2
10.1755	6.19916	2.02548	55.2674	135.73	0	2
12.9106	64.9754	21.2297	57.5187	41.0275	0	2
11.5689	43.8186	14.317	51.4528	25.5023	0	2
14.3931	95.4073	31.1728	66.8004	3.75542	0	2
7.88961	5.17532	1.69095	62.2165	70.7404	0	2
8.57391	8.05797	2.63281	37.3797	85.0333	0	2
9.14539	4.95981	1.62054	60.6371	91.4505	0	2
14.7564	89.416	29.2153	62.7464	5.80992	0	2
8.98959	9.12591	2.98175	43.6306	59.0466	0	2
13.4436	93.6158	30.5875	66.695	1.83096	0	2
9.06903	6.00986	1.96363	50.8728	76.6902	0	2
8.79763	9.50592	3.10591	47.8202	62.424	0	2
9.54545	5.8839	1.92247	52.6835	91.0445	0	2
9.38583	9.48706	3.09975	52.4916	66.6955	0	2
9.96127	15.6524	5.11418	50.6862	46.0496	0	2
9.76451	7.26786	2.37466	49.9598	92.1456	0	2
15.9279	13.7797	4.50231	72.1442	31.9473	0	2
8.77655	8.44358	2.75881	48.5642	63.9932	0	2
8.79118	6.24412	2.04017	47.1691	112.975	0	2
10.3101	5.51348	1.80144	54.8416	103.593	0	2
9.77126	18.9989	6.20757	54.1885	58.0604	0	2
8.08733	14.3476	4.68785	51.5548	66.7388	0	2
9.52688	3.76882	1.2314	50.3562	135.391	0	2
7.01044	1.32985	0.434509	46.6681	189.897	0	2
10.5675	17.9839	5.87595	67.6468	83.5556	0	2
9.69678	3.48762	1.13953	42.7005	149.588	0	2
10.0724	2.54968	0.833066	40.5626	167.711	0	2
9.59917	3.08204	1.00701	49.2098	124.743	0	2
10.1874	2.68842	0.878399	44.0453	170.841	0	2
9.42613	9.64713	3.15205	45.2039	88.7661	0	2
14.1453	17.7301	5.79303	86.4729	25.0518	0	2
10.9173	7.91328	2.58554	56.8279	116.463	0	2
10.2839	7.57372	2.47459	52.6008	100.758	0	2
10.4541	3.48131	1.13746	51.2831	162.67	0	2
11.9134	9.823	3.20951	69.5943	97.2905	0	2
12.2939	19.5713	6.3946	64.6371	53.5487	0	2
9.2206	3.34131	1.09172	46.6608	155.964	0	2
10.2892	5.78923	1.89154	49.6967	136.226	0	2
8.70345	2.56306	0.83744	38.0871	213.082	0	2
12.5045	8.98094	2.93438	60.0812	116.314	0	2
7.88657	3.32407	1.08609	63.0069	178.568	0	2
9.49091	32.9091	10.7525	49.8	57.4469	0	2
9.23273	6.13213	2.00358	51.1321	136.553	0	2
9.74812	3.65447	1.19404	46.2583	175.108	0	2
13.788	81.6373	26.6737	51.5193	2.15035	0	2
10.9304	45.7124	14.9358	60.7062	57.2786	0	2
8.52565	2.61361	0.853956	84.9079	145.841	0	2
6.69958	11.7066	3.82494	60.3761	108.678	0	2
10.2761	15.2534	4.98379	58.0845	119.97	0	2
10.9772	7.15944	2.33923	55.0521	159.894	0	2
9.98311	66.2413	21.6433	58.3571	49.1779	0	2
12.9329	73.0392	23.8644	56.8873	5.93784	0	2
11.7085	77.0339	25.1696	58.7559	17.2162	0	2
7.21662	1.91395	0.625352	60.2344	195.386	0	2
9.84272	6.32042	2.0651	49.5962	165.684	0	2
11.3974	47.8019	15.6185	59.2218	66.9075	0	2
12.8625	87.043	28.4399	60.6976	10.3239	0	2
7.23745	3.03861	0.992817	61.1931	173.729	0	2
10.8371	74.2683	24.266	55.3952	32.9958	0	2
12.038	57.269	18.7117	60.474	58.821	0	2
10.5792	18.4538	6.02948	62.2063	73.4715	0	2
12.7585	30.8364	10.0753	79.0472	98.7535	0	2
9.68359	7.38917	2.41429	75.2487	91.3253	0	2
10.5731	7.67172	2.50661	58.2633	146.003	0	2
11.592	11.7394	3.83567	61.1726	114.961	0	2
11.1332	11.1629	3.6473	57.6278	156.084	0	2
10.3543	30.0403	9.81518	40.6528	33.1478	0	2
9.45192	19.9832	6.52918	48.9363	53.4103	0	2
9.18825	2.47289	0.807978	43.3961	141.505	0	2
26.5068	9.21719	3.01157	70.9683	19.8776	0	2
9.01373	9.08448	2.96821	50.5977	73.2264	0	2
7.89761	20.4608	6.68522	49.8225	54.3628	0	2
9.59694	3.90717	1.2766	47.1821	118.828	0	2
9.09451	3.60659	1.1784	43.1473	115.464	0	2
9.69111	83.1467	27.1669	51.2718	5.93784	0	2
9.49723	8.59801	2.80926	49.175	82.2667	0	2
9.64538	4.18173	1.36631	50.0717	117.302	0	2
10.0592	20.2076	6.60251	53.7098	58.3028	0	2
9.30123	5.35162	1.74856	47.4658	130.419	0	2
9.60955	8.28349	2.7065	59.8702	93.101	0	2
8.69663	3.42572	1.1193	45.8926	156.288	0	2
7.53356	2.03356	0.664432	33.505	195.266	0	2
7.43063	2.07748	0.678783	64.6919	140.322	0	2
9.55367	6.97928	2.28037	81.9991	108.691	0	2
11.1283	18.4921	6.04199	94.6759	37.0101	0	2
8.37821	3.6475	1.19176	88.7489	122.424	0	2
10.4573	17.6406	5.76379	51.6229	82.9022	0	2
11.2554	61.0942	19.9616	59.7526	37.4556	0	2
11.1434	6.80329	2.22287	53.9438	145.097	0	2
9.68713	2.88986	0.944217	42.8324	191.588	0	2
12.7879	35.3623	11.5541	67.542	84.9081	0	2
10.6333	6.79806	2.22116	68.6276	174.839	0	2
9.57609	34.6512	11.3217	51.6729	62.3462	0	2
10.4342	51.5533	16.8442	56.607	47.6243	0	2
11.0032	35.2229	11.5085	63.1916	71.8905	0	2
9.42764	3.98044	1.30055	52.0769	167.507	0	2
12.4305	12.668	4.13905	51.473	132.159	0	2
9.13779	3.99318	1.30471	46.2347	198.161	0	2
9.59517	4.51488	1.47516	49.1825	174.412	0	2
7.83454	3.69088	1.20594	45.8402	187.137	0	2
12.1518	77.6174	25.3603	61.9662	37.8501	0	2
13.8513	90.9296	29.7098	67.5571	8.08171	0	2
9.64147	5.54545	1.81189	49.3544	166.012	0	2
10.8109	11.23	3.66924	54.3393	146.285	0	2
13.4448	51.9455	16.9724	71.0987	69.4008	0	2
12.1929	91.8209	30.001	65.6315	7.64055	0	2
8.97313	5.1801	1.69251	50.6517	167.648	0	2
10.9686	70.5523	23.0518	52.0058	12.1357	0	2
7.1694	2.25273	0.736044	34.5191	124.959	0	2
8.34874	15.3687	5.02148	47.8824	48.4902	0	2
8.49949	22.1686	7.24322	50.7831	37.7691	0	2
9.45463	12.5252	4.09241	50.3841	65.1453	0	2
5.98229	1.03229	0.337285	45.4979	173.913	0	2
6.62462	1.22099	0.398939	48.1423	156.218	0	2
9.64403	29.2169	9.54615	64.3691	45.4457	0	2
8.8995	14.4249	4.7131	53.5284	72.3689	0	2
7.90382	3.27176	1.06899	54.8473	94.0185	0	2
9.86546	6.32932	2.068	50.3474	127.638	0	2
10.1734	46.0207	15.0365	54.7692	50.3854	0	2
10.7693	75.7264	24.7424	48.3691	3.80132	0	2
8.35583	13.2377	4.32522	55.4356	74.3816	0	2
6.77778	1.0452	0.341502	42.3672	191.667	0	2
9.10532	21.8057	7.12467	70.3241	54.0119	0	2
8.00238	44.1891	14.4381	50.1641	43.3417	0	2
9.78632	19.3552	6.324	57.7413	79.1499	0	2
6.88973	1.98606	0.648913	61.4474	187.007	0	2
9.55724	20.5816	6.7247	56.2644	64.5463	0	2
10.84	12.5434	4.09836	59.7512	109.381	0	2
9.79193	33.681	11.0047	57.5435	59.9683	0	2
8.3224	30.2211	9.87427	50.5378	50.9512	0	2
8.678	33.4184	10.9189	61.3311	65.2915	0	2
9.02305	2.55442	0.834615	43.0026	208.93	0	2
9.73624	31.7993	10.3899	57.3647	73.2832	0	2
10.593	75.2713	24.5937	52.1457	19.5463	0	2
7.09402	1.64387	0.53711	53.7607	185.281	0	2
10.4801	75.7383	24.7463	50.6542	25.4887	0	2
12.0165	90.1938	29.4694	59.1072	28.4058	0	2
9.4689	4.65153	1.51981	47.3416	174.107	0	2
10.9796	9.1545	2.99109	72.1749	156.117	0	2
9.19278	3.75052	1.22542	48.4464	190.956	0	2
10.0417	7.4122	2.42182	61.2783	156.896	0	2
10.4962	57.8699	18.9081	48.2412	30.5641	0	2
8.33419	3.97558	1.29896	39.581	183.063	0	2
10.7506	10	3.26734	48.8441	126.043	0	2
13.73	91.3385	29.8434	57.3152	16.1204	0	2
10.1502	16.7291	5.46595	67.4433	107.994	0	2
11.9034	51.1517	16.713	63.8391	68.9521	0	2
10.3724	77.5031	25.3229	52.4707	1.40186	0	2
8.57546	10.3004	3.3655	49.5261	81.2259	0	2
9.7225	30.669	10.0206	48.8761	38.2632	0	2
8.72922	8.233	2.69	48.4597	82.9579	0	2
7.84702	21.261	6.94668	52.775	39.252	0	2
9.48086	2.58671	0.845167	38.6791	185.05	0	2
9.01058	10.6169	3.46891	48.8328	72.0166	0	2
8.69372	26.1836	8.55507	54.0879	56.3396	0	2
10.1871	7.41727	2.42347	48.4101	102.939	0	2
10.731	19.4556	6.35681	57.6168	85.7663	0	2
9.95287	7.18621	2.34798	48.0667	141.93	0	2
10.2132	34.9003	11.4031	52.8712	41.9745	0	2
8.67568	6.85185	2.23873	48.6767	115.97	0	2
10.4561	10.1257	3.30842	57.0687	119.897	0	2
9.26402	3.68665	1.20456	45.5445	151.567	0	2
8.83602	19.9019	6.50262	52.7782	75.6147	0	2
7.59335	3.24954	1.06173	65.281	129.59	0	2
10.4272	19.1007	6.24086	63.2779	92.353	0	2
9.44626	5.36336	1.75239	42.0123	190.642	0	2
7.30808	4.41667	1.44308	61.3864	182.256	0	2
9.51087	4.29891	1.4046	44.4737	166.366	0	2
11.1125	81	26.4655	55.9292	15.7725	0	2
10.154	6.81126	2.22547	57.5993	159.382	0	2
9.46751	4.83543	1.5799	50.9036	177.445	0	2
9.23982	4.89879	1.6006	50.9516	168.621	0	2
10.891	75.4968	24.6674	58.25	13.1242	0	2
9.19796	4.04694	1.32227	46.749	184.903	0	2
10.6332	77.1257	25.1996	49.12	18.5542	0	2
8.30542	15.6786	5.12274	83.5215	59.7859	0	2
8.79677	7.33141	2.39542	48.9607	167.703	0	2
13.4796	97.8724	31.9783	68.2214	27.9545	0	2
11.102	77.1967	25.2228	50.6725	8.944	0	2
9.25558	25.7701	8.41997	51.2701	42.2258	0	2
8.43558	21.6407	7.07074	45.702	54.2606	0	2
6.76518	2.68016	0.8757	59.9352	118.168	0	2
8.29209	47.1981	15.4212	70.4923	7.84951	0	2
8.25676	17.1847	5.61482	44.9324	53.0247	0	2
8.12877	22.8274	7.45849	51.4795	60.4799	0	2
9.07809	8.85642	2.8937	62.597	88.1781	0	2
10.6731	5.84951	1.91124	46.0583	115.872	0	2
7.16667	2.58032	0.843079	66.4408	135.811	0	2
10.0795	3.32768	1.08727	43.4549	172.793	0	2
6.75476	9.29577	3.03725	79.8766	73.7494	0	2
8.22236	2.72418	0.890082	60.3925	192.372	0	2
9.01434	7.02869	2.29651	60.1455	153.296	0	2
9.43559	43.1572	14.1009	61.3493	52.8839	0	2
10.8813	86.9518	28.4101	56.7575	28.5924	0	2
11.4632	85.1547	27.823	61.4884	7.84951	0	2
7.15977	3.41353	1.11532	41.5056	202.801	0	2
9.49638	4.15408	1.35728	50.5367	184.696	0	2
12.6023	94.7933	30.9722	57.6978	17.4065	0	2
8.77289	8.83004	2.88507	71.8242	153.644	0	2
15.8098	95.3488	31.1537	63.342	10.5564	0	2
8.99768	7.04408	2.30154	49.5615	171.557	0	2
10.7272	83.7151	27.3526	52.5469	20.5833	0	2
10.7903	9.02142	2.94761	54.1488	156.839	0	2
7.06998	11.219	3.66562	72.6012	102.105	0	2
10.373	10.5359	3.44244	52.4956	145.089	0	2
9.00274	4.35616	1.42331	47.4644	179.398	0	2
10.3408	8.6172	2.81553	58.1801	155.529	0	2
9.43996	6.0627	1.98089	45.1424	195.87	0	2
10.2213	56.7256	18.5342	51.2349	27.234	0	2
8.67001	12.1775	3.97881	48.7111	71.4129	0	2
8.88403	16.1586	5.27958	51.0372	67.5377	0	2
9.48305	13.447	4.3936	47.6038	79.824	0	2
7.12385	3.14908	1.02891	75.539	89.7201	0	2
10.2484	4.15375	1.35717	43.3311	175.322	0	2
6.68921	1.8277	0.597171	61.1868	197.692	0	2
6.90349	2.25624	0.73719	31.4143	211.132	0	2
13.1397	84.2783	27.5366	57.6444	11.7386	0	2
9.09563	4.47107	1.46085	46.7037	191.98	0	2
10.1048	4.91266	1.60513	47.9869	180.744	0	2
8.71798	4.17979	1.36568	38.5006	195.207	0	2
12.248	88.0821	28.7794	61.8438	11.2663	0	2
8.22461	39.0947	12.7736	87.208	19.8776	0	2
8.77763	4.34088	1.41831	41.6791	177.084	0	2
12.0171	93.3008	30.4845	68.1423	15.8054	0	2
11.2415	74.5592	24.361	57.0906	1.02	0	2
6.66479	1.80474	0.58967	55.4594	147.499	0	2
8.17503	18.5681	6.06682	50.6858	55.4992	0	2
8.4498	50.7982	16.5975	58.3996	33.8159	0	2
6.06121	7.18002	2.34596	71.234	94.4209	0	2
6.9527	18.9905	6.20486	36.2986	4.53617	0	2
7.31124	13.3171	4.35115	88.1611	51.5389	0	2
6.41577	12.4609	4.07141	72.114	44.4777	0	2
5.34305	7.1297	2.32952	60.9812	147.629	0	2
9.30856	76.9453	25.1407	56.1234	19.1882	0	2
12.1919	104.738	34.2216	60.9349	23.8121	0	2
6.79354	17.1371	5.59928	80.0307	49.7517	0	2
10.9908	83.4366	27.2616	56.9191	30.0991	0	2
7.52834	4.18464	1.36727	62.192	175.872	0	2
8.3736	20.0056	6.53651	66.5957	6.88448	0	2
7.49685	7.86331	2.56921	53.8202	180.975	0	2
8.32164	20.8507	6.81263	57.8788	4.26019	0	2
10.8876	94.77	30.9646	54.5609	21.592	0	2
8.18325	19.9642	6.52299	55.2086	3.04105	0	2
10.9351	97.117	31.7314	53.9467	7.42571	0	2
8.32922	35.1389	11.4811	46.4743	48.4688	0	2
9.42645	17.6131	5.7548	55.293	70.5973	0	2
7.17736	1.81926	0.594413	36.3091	129.511	0	2
9.07361	35.4301	11.5762	53.8801	42.8832	0	2
8.45445	32.2921	10.5509	48.5058	33.071	0	2
5.96583	6.58191	2.15053	69.8693	136.372	0	2
6.5797	9.65279	3.1539	58.1178	184.805	0	2
10.2618	4.75845	1.55475	42.6064	197.999	0	2
8.00663	19.3687	6.32841	46.7878	59.6203	0	2
8.54449	18.6379	6.08963	80.0405	6.12944	0	2
8.67027	21.1082	6.89678	55.1486	12.6943	0	2
4.31627	8.76218	2.8629	45.6912	192.572	0	2
5.30859	7.64141	2.49671	51.3828	198.628	0	2
6.39269	16.4895	5.38768	75.3543	20.0715	0	2
7.31996	21.2311	6.93694	58.8109	27.7428	0	2
5.47219	4.80724	1.57069	50.2096	141.107	0	2
6.06471	6.20829	2.02846	53.7412	130.773	0	2
19.8707	10.7558	2.78861	84.9187	65.6209	1	3
86.0227	39.1396	10.1476	92.3322	44.4048	1	3
178.405	59.5933	15.4505	72.261	45.9554	1	3
149.495	20.6515	5.35422	59.2503	70.3808	1	3
164.417	17.0115	4.41049	80.9468	58.2195	1	3
215.111	36.1714	9.37801	93.9232	47.1142	1	3
43.0325	36.5888	9.48622	80.3084	46.5105	1	3
137.617	52.8144	13.693	65.5198	35.8954	1	3
174.312	55.0867	14.2821	63.2697	28.932	1	3
183.747	25.2684	6.55124	63.0587	54.3585	1	3
85.1595	30.1063	7.80554	66.6595	44.5296	1	3
233.337	39.3268	10.1961	93.8373	50.0678	1	3
32.4098	30.8852	8.00748	63.541	51.708	1	3
205.911	57.3864	14.8783	66.9254	36.1185	1	3
154.543	83.7538	21.7145	57.1544	17.1658	1	3
170.611	56.7182	14.7051	64.4022	32.0845	1	3
164.517	65.5107	16.9847	54.9036	18.6381	1	3
153.365	72.4567	18.7855	51.1033	20.0715	1	3
124.903	21.6956	5.62492	63.8531	39.8903	1	3
32.778	10.441	2.70698	80.5853	60.2482	1	3
169.06	102.352	26.5363	62.5735	7.84951	1	3
195.713	25.8717	6.70766	67.4764	50.66	1	3
172.861	53.9156	13.9785	54.7092	21.4443	1	3
19.6383	7.3503	1.90568	75.9404	79.1996	1	3
134.959	13.084	3.39223	118.588	48.7352	1	3
159.964	64.385	16.6928	66.8208	22.3497	1	3
140.432	10.5624	2.73847	121.091	42.4687	1	3
27.3802	9.70805	2.51696	72.9593	64.1457	1	3
102.441	17.9003	4.64093	78.3612	50.2855	1	3
49.3296	62.1191	16.1054	59.482	16.6704	1	3
145.242	90.9239	23.5734	57.3684	9.4835	1	3
45.776	5.89905	1.52942	67.3233	84.7937	1	3
37.0974	15.4719	4.01132	58.4665	38.7137	1	3
232.411	53.7022	13.9231	51.1972	11.8757	1	3
178.686	36.8135	9.54448	68.8774	44.8594	1	3
97.373	18.1112	4.69562	81.8461	55.9587	1	3
91.6899	33.9966	8.81415	80.7366	46.2825	1	3
71.0967	20.368	5.28073	71.7539	45.1317	1	3
136.134	19.5557	5.07011	74.0274	45.7701	1	3
158.188	78.5287	20.3598	68.3195	14.7616	1	3
165.23	36.9476	9.57925	65.4651	58.3464	1	3
32.3421	41.5324	10.7679	64.1245	25.4841	1	3
52.5336	12.7677	3.31023	59.1713	61.6339	1	3
218.703	12.7929	3.31676	66.0155	70.8515	1	3
38.3942	35.3074	9.154	60.0434	29.0615	1	3
93.1822	38.8592	10.0748	71.1793	25.8243	1	3
184.739	26.2598	6.80827	60.634	39.6869	1	3
109.745	41.9306	10.8712	60.6636	33.744	1	3
47.3448	11.818	3.064	59.5067	57.9448	1	3
61.2495	12.7665	3.30991	69.5948	56.7953	1	3
99.7245	28.9986	7.51835	66.3623	53.4784	1	3
177.235	25.8268	6.69601	50.0563	66.5463	1	3
234.4	78.657	20.3931	65.9663	22.1	1	3
73.383	13.8305	3.58577	67.3337	54.6174	1	3
80.1734	11.8155	3.06335	54.8782	45.6867	1	3
156.308	42.3511	10.9802	68.3555	32.6559	1	3
121.907	25.8024	6.68968	80.595	48.1433	1	3
141.234	106.647	27.65	69.3005	18.6133	1	3
160.96	28.0458	7.2713	58.9978	51.4513	1	3
147.806	35.0316	9.08249	58.8746	42.5	1	3
106.066	60.0198	15.5611	66.4833	15.3	1	3
145.745	32.0932	8.32067	60.3815	42.5449	1	3
150.903	33.8299	8.77094	67.7684	46.1912	1	3
119.207	57.2485	14.8426	54.3047	16.2526	1	3
199.805	69.7921	18.0947	63.195	27.7928	1	3
170.394	16.0453	4.16	56.9105	65.8311	1	3
151.374	32.2285	8.35575	71.3283	45.808	1	3
80.4941	68.1353	17.6652	64.9968	6.80849	1	3
212.121	98.1138	25.4375	60.9759	17.8492	1	3
147.269	56.0902	14.5423	74.5941	30.323	1	3
42.6797	68.7165	17.8158	65.687	24.257	1	3
91.292	26.4492	6.85736	72.7872	59.4621	1	3
143.689	48.7218	12.6319	65.6356	45.5257	1	3
172.424	22.3678	5.79921	64.3206	44.676	1	3
210	77.2171	20.0198	68.96	25.9226	1	3
93.6845	52.3984	13.5851	67.1939	38.9474	1	3
151.763	53.6214	13.9022	62.2842	39.4752	1	3
6.55055	36.4549	9.45151	72.1954	68.6876	0	3
6.70833	60.5216	15.6912	58.0302	27.2276	0	3
6.08684	25.1118	6.51064	66.8316	76.1858	0	3
4.85045	2.14234	0.555436	58.9333	169.952	0	3
4.42887	2.09342	0.542751	63.465	177.588	0	3
6.32172	19.874	5.15264	64.622	60.1185	0	3
6.96707	51.3939	13.3247	73.9159	28.4972	0	3
5.14038	3.95577	1.0256	70.7077	93.2196	0	3
4.98097	2.7167	0.704348	83.5624	174.49	0	3
7.00151	77.1265	19.9963	81.4096	19.956	0	3
7.74431	85.4565	22.1559	71.6201	8.5	0	3
5.18595	2.3781	0.616559	85.0888	176.256	0	3
8.11111	35.7961	9.28069	74.8353	36.2798	0	3
6.14215	3.6	0.933356	74.8033	126.745	0	3
7.95923	4.9318	1.27865	77.0237	90.2865	0	3
5.32787	12.1197	3.14221	89.3803	79.7487	0	3
7.05959	28.0233	7.26547	69.7965	51.6766	0	3
6.66709	15.6696	4.06259	70.9142	64.1691	0	3
7.65741	4.39175	1.13863	92.9818	139.589	0	3
4.14217	1.78072	0.46168	134.566	165.749	0	3
7.32519	8.71374	2.25917	124.999	74.0186	0	3
5.13514	3.94595	1.02305	74.3514	126.745	0	3
8.06803	3.92377	1.0173	127.898	140.186	0	3
7.92026	4.83573	1.25374	95.8828	157.582	0	3
7.32659	7.42924	1.92615	82.9876	73.7494	0	3
5.86515	3.01818	0.782511	80.7288	108.762	0	3
5.86023	4.22622	1.09571	77.6138	102.773	0	3
7.32314	20.3057	5.26456	102.587	54.1711	0	3
6.37463	4.45821	1.15586	82.3343	87.8681	0	3
8.01721	42.9013	11.1228	90.596	41.5482	0	3
7.86145	12.4925	3.23887	68.5723	90.5652	0	3
7.61042	65.7123	17.037	80.1268	56.397	0	3
5.89792	3.91682	1.0155	43.9244	155.934	0	3
6.10405	89.9581	23.323	65.1503	13.6551	0	3
7.78684	75.4539	19.5626	62.2539	33.6445	0	3
6.07417	70.309	18.2287	55.2979	3.46733	0	3
8.25704	63.5233	16.4694	66.6242	47.6837	0	3
8.3759	95.6662	24.803	61.0892	23.9163	0	3
6.47332	7.54292	1.95562	59.819	116.358	0	3
9.33605	46.3401	12.0144	68.0966	44.9469	0	3
8.574	98.4662	25.5289	61.9059	15.699	0	3
7.86838	69.077	17.9093	64.305	36.3434	0	3
8.24354	59.7934	15.5024	53.428	24.9478	0	3
7.8445	5.04665	1.30842	103.041	150.699	0	3
7.71528	51.4306	13.3342	85.9444	53.0542	0	3
6.74146	3.76423	0.975935	51.2439	188.439	0	3
8.53846	53.3646	13.8356	102.916	28.1729	0	3
7.49249	101.733	26.3758	69.7843	15.1786	0	3
9.58805	47.4921	12.3131	69.6714	44.7898	0	3
8.49281	30.4209	7.88709	74.5803	64.8287	0	3
8.01444	58.9158	15.2748	64.2647	5.37587	0	3
8.69038	69.8038	18.0977	68.0173	26.3055	0	3
8.46598	79.9031	20.7161	73.6742	14.6042	0	3
8.11065	5.57155	1.44451	68.4884	115.356	0	3
6.30959	3.98082	1.03209	59.6808	182.893	0	3
8.84848	27.5249	7.13626	77.4113	54.8413	0	3
9.11422	46.0119	11.9293	77.7694	44.145	0	3
9.92356	68.2769	17.7019	58.4424	12.8032	0	3
7.14307	6.09389	1.57994	84.4948	98.802	0	3
7.61671	45.8077	11.8764	59.9854	37.5435	0	3
7.58068	4.20909	1.09127	68.2898	120.23	0	3
7.2801	4.33415	1.1237	102.948	83.4934	0	3
10.5922	70.6217	18.3098	58.8901	6.20442	0	3
7.03317	12.7555	3.30707	115.173	47.6631	0	3
9.69004	69.5823	18.0403	76.6945	28.4668	0	3
6.28426	4.39086	1.1384	104.503	94.2849	0	3
9.28521	27.696	7.18062	72.6761	56.6853	0	3
8.66046	16.6656	4.32083	77.4296	70.747	0	3
5.76931	2.13519	0.553582	82.6223	197.963	0	3
7.93813	6.51956	1.6903	68.4813	83.6904	0	3
6.72017	3.141	0.814353	52.1974	213.354	0	3
6.84178	4.59601	1.19159	68.318	162.965	0	3
7.42485	4.05711	1.05187	69.9208	113.979	0	3
7.72652	4.63853	1.20261	78.6183	122.646	0	3
7.26809	5.30921	1.3765	71.9326	103.785	0	3
10.3234	64.3918	16.6946	71.1254	17.8395	0	3
7.62902	3.87565	1.00482	71.6404	153.725	0	3
8.55249	15.6002	4.0446	68.824	63.165	0	3
7.5445	4.19904	1.08867	65.3091	138.874	0	3
7.8483	5.97405	1.54887	80.5813	93.4078	0	3
7.45679	3.54691	0.919593	113.721	82.62	0	3
7.56151	4.25769	1.10387	66.9284	167.258	0	3
6.23772	3.30586	0.857097	54.1141	188.258	0	3
5.78444	2.37372	0.615425	93.0038	206.408	0	3
6.12226	2.78527	0.722124	64.2492	201.455	0	3
6.78616	4.1508	1.07616	61.6316	178.135	0	3
8.86515	4.75711	1.23336	85.6845	109.309	0	3
7.27958	3.75986	0.974802	56.8535	213.33	0	3
6.83363	2.73599	0.709347	100.361	185.375	0	3
8.55798	16.7899	4.35304	71.5025	63.1348	0	3
8.69792	25.8839	6.71081	65.6399	53.5648	0	3
7.51256	5.13945	1.33248	69.8467	144.343	0	3
9.90831	78.2614	20.2905	68.9537	10.54	0	3
8.19481	4.76531	1.23548	70.6169	152.06	0	3
9.15256	19.7776	5.12764	75.6526	62.0125	0	3
7.11567	3.66772	0.950913	66.2324	180.51	0	3
5.49004	2.12058	0.549792	97.3363	190.231	0	3
10.5793	60.9091	15.7916	74.8065	20.2864	0	3
6.32121	3.23333	0.838292	50.3727	199.051	0	3
9.03632	5.94765	1.54202	92.8088	113.633	0	3
7.87873	5.07733	1.31638	71.3445	127.577	0	3
8.92005	13.3566	3.46291	94.3249	75.0407	0	3
8.01365	5.43548	1.40923	94.7357	147.937	0	3
8.74199	28.3659	7.35431	77.1956	61.6789	0	3
6.82353	5.23922	1.35835	76.1922	102.335	0	3
6.42009	4.79224	1.24246	71.4224	137.058	0	3
9.9889	61.9899	16.0719	72.4258	30.4732	0	3
7.10747	3.19672	0.8288	61.2341	179.291	0	3
8.04988	5.62993	1.45965	96.4118	95.6676	0	3
8.62801	4.95191	1.28386	98.6846	141.731	0	3
7.92913	6.80652	1.7647	76.9303	85.1936	0	3
7.75285	4.81663	1.24879	94.3542	107.952	0	3
7.38606	3.68362	0.955035	76.8531	140.39	0	3
5.94028	2.19653	0.569484	108.587	164.78	0	3
5.61712	2.24495	0.582038	58.3389	185.307	0	3
6.7874	2.90157	0.752279	62.0682	109.864	0	3
8.53533	8.71976	2.26073	88.3162	76.0157	0	3
7.32508	3.57792	0.927631	72.1053	146.547	0	3
7.21558	3.70216	0.959844	72.3515	126.748	0	3
6.85064	2.73411	0.708861	60.6695	174.002	0	3
8.37005	4.95508	1.28468	85.6877	99.2893	0	3
7.08187	3.34243	0.866577	64.0158	185.385	0	3
6.07132	3.11318	0.80714	68.3783	163.716	0	3
8.3519	7.10633	1.84243	84.1228	77.7173	0	3
7.63363	4.32405	1.12108	75.2261	86.3821	0	3
7.12863	3.56183	0.923459	71.2183	148.701	0	3
7.28836	5.41458	1.40381	81.2862	96.0992	0	3
6.59459	2.70982	0.702562	74	173.092	0	3
6.8674	3.38321	0.877151	81.2968	137.639	0	3
11.0764	84.9724	22.0304	72.1128	21.6241	0	3
8.19801	7.72677	2.00329	74.7887	67.5223	0	3
7.18287	7.66038	1.98607	88.5356	74.6453	0	3
7.30386	3.49382	0.905828	73.983	153.132	0	3
6.56242	3.69262	0.957369	93.1758	116.463	0	3
7.02184	3.54416	0.918879	72.3989	169.304	0	3
6.54	3.54267	0.918492	60.2267	126.58	0	3
11.5503	108.776	28.2018	100.639	22.5043	0	3
10.2103	15.3317	3.97498	126.445	37.7017	0	3
5.79574	2.00213	0.519083	112.953	157.192	0	3
8.06067	4.74853	1.23113	79.5181	111.406	0	3
6.43036	2.59724	0.673375	54.7553	180.024	0	3
8.84862	7.83136	2.0304	89.5247	75.4785	0	3
8.04959	17.3566	4.49996	83.4557	60.3143	0	3
6.93933	3.02092	0.783221	79.8253	143.545	0	3
9.56143	45.9533	11.9141	91.8808	46.8362	0	3
11.7546	49.1895	12.7531	69.6553	24.2832	0	3
7.72932	4.22449	1.09527	86.8485	104.034	0	3
9.03222	47.6559	12.3555	70.076	37.2839	0	3
6.41398	3.03763	0.787554	61.1774	171.83	0	3
6.51082	3.51659	0.911732	69.6421	122.913	0	3
8.02885	13.8438	3.58921	76.107	55.6822	0	3
7.26925	2.84809	0.738411	66.6221	169.856	0	3
7.24982	3.89283	1.00928	75.8426	112.766	0	3
9.37649	25.3492	6.57219	89.2572	37.4077	0	3
7.68375	6.4775	1.67939	87.6937	90.9638	0	3
8.38336	25.9406	6.7255	86.0505	42.0186	0	3
7.24476	3.79429	0.983728	70.8229	123.127	0	3
7.2208	67.0496	17.3837	57.4928	31.8821	0	3
8.50467	50.2773	13.0352	59.0945	41.9318	0	3
7.26351	107.08	27.7622	64.3727	4.95047	0	3
8.89264	59.3429	15.3856	77.1451	29.3525	0	3
7.40791	84.6156	21.9379	65.2094	8.08171	0	3
9.69108	52.836	13.6986	77.7325	37.4216	0	3
8.22636	6.55659	1.6999	72.8109	102.939	0	3
7.57434	3.03499	0.786868	110.516	158.336	0	3
9.0284	11.57	2.9997	80.7039	59.2264	0	3
8.02278	5.28416	1.37	75.1866	100.487	0	3
10.6019	58.4013	15.1414	81.5386	38.0754	0	3
9.49031	52.155	13.522	67.6647	27.7928	0	3
10.867	64.0665	16.6102	67.8476	26.4458	0	3
10.0546	93.435	24.2245	68.3813	8.86611	0	3
7.42825	3.43508	0.890598	60.8109	174.767	0	3
8.26066	4.37028	1.13306	71.0256	131.499	0	3
7.80622	4.08433	1.05893	78.9672	160.118	0	3
8.01691	4.08005	1.05782	72.0248	115.82	0	3
7.814	3.81952	0.990271	57.8361	182.008	0	3
11.0034	77.0114	19.9664	68.4743	11.9	0	3
8.42092	4.6301	1.20043	79.8036	103.862	0	3
10.4004	34.1279	8.84819	107.111	50.9512	0	3
8.10638	4.9641	1.28702	65.7207	168.46	0	3
8.30694	4.07204	1.05574	87.9852	99.365	0	3
8.98691	4.52064	1.17205	75.4149	121.286	0	3
8.8767	5.24548	1.35997	77.8529	134.276	0	3
8.07713	3.60106	0.933632	72.0731	208.888	0	3
7.45372	3.02608	0.784558	54.2099	202.001	0	3
7.94576	2.96245	0.768061	122.586	109.381	0	3
9.66584	5.63861	1.4619	87.4282	124.023	0	3
9.72738	6.24478	1.61906	86.9095	95.4874	0	3
9.04609	4.77278	1.23742	75.0021	124.106	0	3
8.12664	2.79934	0.725773	85.8076	189.319	0	3
9.78202	3.95777	1.02611	123.813	113.057	0	3
8.12635	3.85516	0.999511	72.0524	148.44	0	3
9.68119	8.67775	2.24984	95.6686	84.2302	0	3
9.53468	6.08054	1.57647	95.7405	127.046	0	3
8.74029	6.43597	1.66863	87.8058	70.6955	0	3
9	14.202	3.68208	63.9815	59.4572	0	3
8.68706	27.7059	7.18318	61.0176	47.6631	0	3
7.81781	3.51656	0.911724	76.8468	165.306	0	3
8.79726	4.0411	1.04772	85.2932	113.371	0	3
7.27642	3.22764	0.836817	65.3951	186.434	0	3
6.97449	2.96939	0.76986	71.0102	178.409	0	3
7.67261	3.91186	1.01421	72.0797	155.884	0	3
10.5134	57.8378	14.9954	70.9327	32.3268	0	3
10.058	6.9776	1.80905	105.634	90.1673	0	3
9.14599	4.31668	1.11917	88.986	99.0918	0	3
9.72294	13.2251	3.42882	70.9286	67.9668	0	3
9.52935	61.1811	15.8622	53.2856	4.86806	0	3
7.62411	3.85532	0.999552	74.5418	114.346	0	3
6.96441	3.14915	0.816467	65.8424	156.77	0	3
8.82809	5.04258	1.30737	81.5141	85.5963	0	3
8.26456	4.36466	1.13161	89.1399	103.451	0	3
7.7677	3.73913	0.969428	71.6783	116.33	0	3
7.24306	4.75347	1.23241	85.1389	126.836	0	3
7.83162	3.45463	0.895667	81.189	136.773	0	3
6.58981	3.40291	0.882258	92.5024	169.769	0	3
7.58466	3.95314	1.02491	73.1161	159.058	0	3
7.29402	3.75415	0.973323	79.8306	88.5052	0	3
7.60042	2.93772	0.76165	63.9874	164.43	0	3
6.97564	3.26682	0.846975	70.5035	128.817	0	3
9.91138	10.1455	2.63038	100.078	74.3544	0	3
7.36897	4.09885	1.06269	77.7299	143.572	0	3
7.02594	3.48467	0.903455	62.2807	102.714	0	3
7.64324	3.75332	0.973106	65.4456	87.8241	0	3
6.61814	4.04008	1.04746	74.5148	97.5539	0	3
7.35356	4.50758	1.16866	73.3384	113.584	0	3
8.82634	23.2185	6.01977	92.2793	66.8236	0	3
7.21859	2.95615	0.766429	61.3423	181.95	0	3
6.23362	2.31223	0.599481	96.4192	138.032	0	3
7.79259	4.85062	1.2576	79.4432	104.082	0	3
7.81212	3.99273	1.03518	129.198	82.3678	0	3
7.02303	3.28311	0.851198	71.6795	156.778	0	3
12.5385	110.285	28.593	109.246	8.18828	0	3
8.37263	6.15138	1.59484	71.9622	70.858	0	3
7.6086	2.84389	0.737323	118.898	138.431	0	3
6.55368	2.69881	0.699708	53.992	150.645	0	3
6.2321	23.3967	6.06596	79.9465	14.3486	0	3
8.87229	31.0319	8.04551	68.0856	69.0476	0	3
8.04878	97.9849	25.4041	61.3531	14.0885	0	3
8.92488	35.9532	9.32143	68.1256	52.7964	0	3
8.72244	21.5798	5.59489	70.0986	70.6685	0	3
9.60359	49.6494	12.8724	78.3566	53.289	0	3
8.50906	9.23716	2.39488	113.535	68.422	0	3
8.54965	20.0567	5.20002	66.2606	58.7177	0	3
8.42016	64.8016	16.8008	66.0806	20.129	0	3
10.046	65.8566	17.0743	67.4696	7.26837	0	3
7.14519	4.60327	1.19347	62.7873	105.688	0	3
6.18069	2.11881	0.549335	79.8465	181.253	0	3
9.71859	13.4895	3.49737	89.4045	73.881	0	3
7.14519	2.48057	0.643127	74.3108	190.266	0	3
7.37567	3.74866	0.9719	100.203	79.2193	0	3
8.17377	3.39798	0.88098	66.3778	125.763	0	3
7.62926	4.15909	1.07831	64.5597	178.922	0	3
7.2443	2.64177	0.684921	110.467	150.501	0	3
7.7878	4.13596	1.07231	59.2084	191.844	0	3
9.46064	3.13994	0.814079	71.9125	81.5731	0	3
9.82239	5.59974	1.45182	80.6731	141.54	0	3
7.78256	2.89807	0.751371	101.761	121.152	0	3
7.34866	3.91379	1.01471	56.0862	188.921	0	3
12.0296	27.6256	7.16237	83.3165	44.1175	0	3
9.45981	5.15514	1.33655	83.7794	161.859	0	3
7.54826	3.94402	1.02255	66.2375	178.996	0	3
9.18079	5.1935	1.3465	86.0184	134.255	0	3
7.39347	3.1097	0.806239	52.6192	204.028	0	3
9.88647	5.40217	1.4006	89.599	144.804	0	3
8.13491	4.14465	1.07456	70.064	188.972	0	3
9.39049	6.19775	1.60686	83.0713	90.7908	0	3
9.657	14.7237	3.81734	80.1169	66.7968	0	3
8.49147	3.81813	0.98991	68.3331	167.78	0	3
8.2194	4.1376	1.07274	77.6829	170.585	0	3
7.28233	2.43691	0.631807	69.1703	193.654	0	3
9.0102	4.09796	1.06246	79.2306	159.889	0	3
9.28755	4.28612	1.11124	88.9671	124.651	0	3
7.60852	3.92596	1.01787	64.3205	150.098	0	3
9.04319	4.55814	1.18177	89.6988	101.897	0	3
9.6655	3.45184	0.894943	84.2032	125.15	0	3
7.75049	3.47041	0.899759	109.483	78.4288	0	3
7.48605	4.03721	1.04671	76.0058	148.557	0	3
10.1284	31.4284	8.14831	71.7091	46.076	0	3
7.10231	3.28383	0.851384	103.106	164.286	0	3
7.96836	3.18287	0.825209	69.0664	137.334	0	3
7.84016	3.98791	1.03393	79.2465	174.014	0	3
7.77684	3.49895	0.907157	68.5474	176.964	0	3
8.64512	4.92073	1.27578	84.4073	106.97	0	3
7.57778	3.63977	0.943666	66.2251	140.249	0	3
9.3866	4.20747	1.09085	89.0052	116.764	0	3
10.1921	6.56667	1.70251	86.0603	90.8099	0	3
12.996	71.8032	18.6161	92.4127	33.5895	0	3
16.178	120.498	31.241	107.02	20.2236	0	3
8.28739	3.90637	1.01279	70.3342	93.2196	0	3
7.63875	4.17406	1.08219	76.1576	84.4029	0	3
11.874	37.8354	9.80942	84.2758	42.4347	0	3
8.22049	4.38341	1.13647	78.6537	120.763	0	3
8.37627	4.59939	1.19246	80.0071	131.705	0	3
9.28466	7.24444	1.87824	91.8138	91.6948	0	3
10.2997	18.4092	4.77288	83.5014	53.101	0	3
12.2402	24.9063	6.45735	84.7973	42.275	0	3
5.67772	2.63904	0.684213	78.4715	175.911	0	3
9.62999	25.6494	6.65002	75.1443	33.1548	0	3
9.14338	5.89416	1.52815	114.667	89.4303	0	3
9.96635	43.5337	11.2868	76.774	69.7531	0	3
7.83645	78.4731	20.3454	63.257	3.66191	0	3
9.55006	54.033	14.0089	76.5665	56.9335	0	3
6.35854	2.62185	0.679755	62.3557	194.462	0	3
11.3933	72.5914	18.8205	73.4116	38.6001	0	3
7.31418	4.6777	1.21277	61.8863	168.596	0	3
8.73978	80.1946	20.7917	67.2495	19.149	0	3
7.42062	5.14573	1.33411	91.4325	81.7203	0	3
10.5648	54.5728	14.1489	74.9264	39.3358	0	3
11.091	86.6191	22.4574	88.7631	31.398	0	3
7.67903	4.82742	1.25158	55.9387	197.057	0	3
7.91421	4.68966	1.21587	66.3524	173.876	0	3
8.91706	29.7974	7.72544	63.872	43.7426	0	3
8.31508	5.10086	1.32248	70.2392	101.346	0	3
9.17042	5.45016	1.41304	97.3333	60.6278	0	3
6.80813	2.46125	0.638116	83.2147	204.865	0	3
6.87009	3.51282	0.910754	55.4291	194.534	0	3
8.05089	3.96836	1.02886	75.2627	135.428	0	3
7.57011	2.88506	0.747996	91.3747	97.8308	0	3
8.08741	4.73427	1.22743	67.958	145.276	0	3
9.67062	8.44955	2.19068	65.3368	68.191	0	3
7.29765	3.27566	0.849266	47.4736	198.106	0	3
13.0205	4.30691	1.11663	112.439	71.9211	0	3
9.71956	11.7934	3.05763	81.9754	60.1877	0	3
6.92043	3.39783	0.880941	52.5696	194.422	0	3
7.89281	4.96336	1.28683	65.3446	199.311	0	3
8.21227	4.0908	1.0606	66.2294	178.778	0	3
10.4872	40.8044	10.5792	72.1885	21.0168	0	3
7.6295	4.20264	1.0896	67.0659	194.328	0	3
10.8794	6.37893	1.65384	102.934	115.612	0	3
12.2679	46.6409	12.0924	76.1468	34.6733	0	3
9.13905	4.9645	1.28712	85.247	98.17	0	3
10.2004	20.9921	5.44253	73.7325	53.6834	0	3
7.36137	3.02234	0.783589	57.6728	182.541	0	3
7.90045	20.7923	5.39073	64.621	39.5015	0	3
6.4345	3.26198	0.84572	72.3067	180.157	0	3
12.8263	29.383	7.61801	64.8632	33.2332	0	3
8.53943	4.17666	1.08286	82.1809	127.906	0	3
7.18013	2.78283	0.721492	64.6448	145.414	0	3
7.344	2.7072	0.701884	67.8464	109.635	0	3
8.40564	3.57685	0.927354	77.0963	93.8819	0	3
8.97697	7.12993	1.84855	96.2516	81.1027	0	3
6.00302	1.90452	0.493777	103.352	133.944	0	3
9.73874	7.60218	1.97098	78.2712	67.0637	0	3
7.25711	3.4471	0.893714	68.7474	176.528	0	3
10.3193	18.268	4.73626	100.079	59.1737	0	3
7.87735	3.68847	0.956294	66.9174	146.18	0	3
12.8069	44.1326	11.4421	93.0229	29.139	0	3
8.92857	8.64286	2.2408	75.3469	45.0561	0	3
6.5098	3.17195	0.822377	62.2036	131.854	0	3
9.01087	10.8587	2.81529	80.665	65.2977	0	3
11.6059	63.4693	16.4554	98.0455	17.1118	0	3
8.60733	8.30541	2.15331	78.2321	56.1258	0	3
11.4992	57.5788	14.9282	77.9416	7.76809	0	3
9.7052	43.3198	11.2313	73.6397	25.1692	0	3
7.36954	3.51225	0.910605	74.115	142.46	0	3
8.45917	87.4351	22.6689	59.6573	27.747	0	3
7.99314	79.2086	20.5361	60.0264	18.7093	0	3
6.42105	2.66362	0.690584	58.1465	183.288	0	3
9.54424	45.28	11.7395	59.7648	43.6711	0	3
8.33821	88.2407	22.8778	74.7495	17.4065	0	3
9.22134	98.133	25.4425	83.9952	3.80132	0	3
10.2309	76.0808	19.7251	64.2952	19.626	0	3
8.99473	3.80369	0.986166	84.9223	80.8943	0	3
7.45627	77.0171	19.9679	71.3156	0.961665	0	3
9.88175	41.6816	10.8066	70.0726	33.2731	0	3
8.68208	15.1006	3.91506	63.7237	45.3425	0	3
7.65293	3.72035	0.964559	59.4345	165.983	0	3
9.47045	7.81576	2.02636	68.6199	72.948	0	3
9.9809	32.7225	8.48381	74.1169	42.357	0	3
7.46321	4.63545	1.20181	61.7291	85.3502	0	3
7.4	3.45051	0.894597	55.996	183.211	0	3
8.2016	4.15888	1.07825	67.7463	114.847	0	3
8.21409	4.99309	1.29454	70.8384	141.077	0	3
10.5941	31.7468	8.23086	80.3422	45.9617	0	3
8.27486	4.98343	1.29203	71.8149	171.816	0	3
8.43849	4.51644	1.17096	60.648	155.3	0	3
9.04745	4.20438	1.09005	87.438	116.111	0	3
9.65097	6.01247	1.55883	87.8144	131.861	0	3
10.2626	8.11271	2.10335	69.8597	57.6528	0	3
9.85395	10.0268	2.59961	94.8048	74.3885	0	3
9.27799	5.56855	1.44373	87.5535	166.079	0	3
8.62032	15.4719	4.01134	79.1123	64.2456	0	3
8.68058	6.31942	1.63841	76.5846	123.776	0	3
8.11842	3.61404	0.936995	64.8925	181.227	0	3
7.82278	4.20886	1.09121	64.2289	193.663	0	3
9.38274	4.99812	1.29584	83.6023	103.575	0	3
8.2703	3.43155	0.889684	69.1206	159.244	0	3
8.72755	5.94694	1.54184	76.4194	81.3908	0	3
6.77986	2.06655	0.535786	70.5375	190.636	0	3
7.18257	3.37552	0.875156	67.471	168.388	0	3
8.56695	4.22799	1.09617	81.3643	129.294	0	3
8.4114	4.19825	1.08846	71.5763	110.914	0	3
8.96136	5.31221	1.37727	98.9104	88.328	0	3
8.43434	3.65278	0.94704	78.1288	130.185	0	3
7.06953	2.15171	0.557864	121.442	117.664	0	3
6.83905	2.68997	0.697418	54.6755	152.285	0	3
7.44463	3.32198	0.861274	64.1056	133.004	0	3
7.55141	3.50169	0.907869	65.0768	158.232	0	3
7.77472	3.5995	0.933227	67.9349	120.983	0	3
7.76012	3.43927	0.891685	74.5486	167.481	0	3
9.1205	5.07914	1.31685	78.7356	102.286	0	3
7.89697	3.44848	0.894074	68.2424	124.787	0	3
6.65705	1.98335	0.514215	109.817	141.482	0	3
10.1732	30.318	7.86042	88.5959	35.8615	0	3
7.61575	3.60903	0.935698	81.4707	111.552	0	3
8.06138	4.19475	1.08756	68.2679	120.499	0	3
7.29271	3.22742	0.836759	70.284	162.563	0	3
8.86182	7.56776	1.96206	85.0186	75.9122	0	3
8.03765	46.9557	12.174	61.0576	56.1093	0	3
8.06831	7.15301	1.85453	61.2978	120.287	0	3
7.30539	92.2481	23.9168	69.9333	8.82691	0	3
8.72388	34.2711	8.88533	73.7247	51.5198	0	3
10.8954	47.0784	12.2058	73.5828	32.5992	0	3
7.36927	3.54178	0.918262	83.8679	136.326	0	3
6.77365	3.77365	0.978378	61.5777	186.674	0	3
9.4172	15.0398	3.89931	88.0653	71.0144	0	3
11.3326	45.0216	11.6726	76.6058	35.5507	0	3
6.65808	2.22509	0.576888	54.4759	203.106	0	3
8.48786	4.7711	1.23698	92.126	93.7932	0	3
7.30682	2.84848	0.738514	52.4924	154.116	0	3
8.41857	4.76143	1.23447	73.3271	126.883	0	3
7.53043	3.02435	0.78411	70.9496	90.1	0	3
8.17778	4.35686	1.12958	73.0693	124.391	0	3
8.92008	4.55458	1.18085	88.1959	58.8446	0	3
8.26351	5.0111	1.29921	58.6839	197.828	0	3
7.74359	3.84455	0.99676	72.2452	183.149	0	3
12.8831	65.4799	16.9767	73.2366	12.9914	0	3
10.0312	5.70652	1.47951	78.2079	145.927	0	3
7.62057	3.51886	0.912319	63.9886	157.863	0	3
8.17847	2.91003	0.754471	108.267	98.7529	0	3
7.76557	3.4043	0.882619	68.9536	189.234	0	3
8.35083	3.99514	1.0358	76.4276	105.381	0	3
11.0791	72.035	18.6762	72.398	1.02	0	3
7.57461	3.36192	0.871631	69.0583	142.246	0	3
8.16061	4.83212	1.2528	101.181	78.3875	0	3
11.8859	96.0861	24.9118	81.6652	3.66191	0	3
6.99482	3.69948	0.959149	66.9914	113.259	0	3
7.66801	3.2163	0.833876	62.7988	176.463	0	3
8.5388	5.30454	1.37528	86.1376	87.4435	0	3
7.83965	3.84343	0.996471	73.577	147.182	0	3
12.1322	49.4045	12.8089	75.954	25.4296	0	3
10.9367	31.8827	8.26609	80.3287	36.267	0	3
9.48515	6.72684	1.74404	95.5558	82.6878	0	3
7.681	3.30824	0.857714	77.8961	161.733	0	3
11.2942	42.9081	11.1246	81.2584	17.4861	0	3
8.34968	11.0149	2.85579	89.209	52.0022	0	3
5.97604	1.91244	0.495831	93.0608	153.378	0	3
8.46232	79.6054	20.6389	54.8416	41.9318	0	3
7.69173	96.3061	24.9689	64.1396	21.7228	0	3
10.1302	79.1808	20.5289	57.8268	45.5879	0	3
7.55308	3.84404	0.996627	63.287	151.978	0	3
8.23567	91.362	23.687	67.742	2.38	0	3
7.48787	4.45649	1.15542	53.174	80.2494	0	3
7.91918	4.73836	1.22849	50.7562	211.041	0	3
9.67457	6.54677	1.69735	81.7681	116.169	0	3
8.09305	7.96043	2.06387	65.1807	63.0789	0	3
7.45714	4.02143	1.04262	68.9014	198.842	0	3
6.25635	1.9214	0.498154	82.6252	185.015	0	3
8.39555	26.2627	6.80903	93.6511	120.56	0	3
9.48879	5.7028	1.47854	73.7897	126.167	0	3
10.7932	13.0998	3.39633	86.001	52.2782	0	3
8.68015	4.58407	1.18849	80.574	124.898	0	3
8.08587	2.95568	0.766306	66.1094	146.802	0	3
7.69891	3.52861	0.914848	70.5204	182.595	0	3
7.14428	2.84577	0.737811	63.1592	153.641	0	3
9.11228	5.20117	1.34848	87.0117	86.1536	0	3
7.69846	3.84409	0.99664	70.5385	176.231	0	3
7.53706	3.60311	0.934164	76.6547	141.806	0	3
10.6082	77.2986	20.0409	71.7443	11.256	0	3
9.7658	22.2	5.7557	76.5534	41.9676	0	3
9.54259	9.85174	2.55422	86.5883	56.2317	0	3
8.23264	5.55687	1.44071	76.3242	95.7503	0	3
7.29558	3.68309	0.954898	93.5612	131.198	0	3
8.86087	12.3237	3.1951	75.6541	45.0651	0	3
9.14474	9.51113	2.46591	78.4261	59.6397	0	3
7.56326	3.6837	0.955056	70.7774	137.734	0	3
8.33567	40.028	10.3779	72.0039	55.6822	0	3
6.24523	17.9401	4.65124	56.3025	142.367	0	3
6.27633	4.32558	1.12147	53.7291	186.614	0	3
7.24005	5.55972	1.44144	58.2588	115.872	0	3
7.49041	4.16418	1.07963	73.9467	128.149	0	3
8.52288	13.3634	3.46467	66.0291	71.1648	0	3
9.33406	26.086	6.76319	55.9989	38.9445	0	3
9.89435	26.3201	6.82389	71.6412	49.5806	0	3
7.41202	5.03863	1.30634	56.1556	150.631	0	3
6.54071	4.53763	1.17645	45.9846	184.735	0	3
7	3.43658	0.890987	75.057	192.541	0	3
8.17202	6.42661	1.6662	79.2557	147.681	0	3
7.97258	5.2684	1.36591	60.3824	100.612	0	3
8.41939	8.08851	2.09707	71.7092	73.2832	0	3
6.70448	2.51541	0.652158	63.5336	172.223	0	3
7.23557	3.5117	0.910463	57.8705	188.285	0	3
6.91816	3.79652	0.984308	60.8358	152.252	0	3
7.00483	3.85907	1.00053	57.4402	184.795	0	3
8.50407	5.22663	1.35508	67.9126	119.748	0	3
8.48584	6.43343	1.66797	69.9164	76.4426	0	3
7.54024	4.31087	1.11766	71.66	113.652	0	3
7.5344	4.02334	1.04311	70.5295	98.8371	0	3
7.50405	3.66093	0.949154	66.1791	167.432	0	3
8.11028	4.76552	1.23554	72.6488	80.4048	0	3
7.74719	3.55374	0.921362	71.0082	134.966	0	3
7.57784	4.75599	1.23306	74.0479	107.563	0	3
7.31532	2.97683	0.771791	58.1622	169.911	0	3
8.26681	4.33088	1.12285	100.775	77.9498	0	3
8.25285	6.17768	1.60166	105.85	62.3601	0	3
10.298	42.7177	11.0752	83.9011	19.956	0	3
6.99065	3.67497	0.952795	67.622	149.761	0	3
5.67288	8.56864	2.22156	47.4678	192.617	0	3
6.52748	2.47357	0.641313	70.0645	191.574	0	3
7.32218	5.125	1.32874	48.7676	164.909	0	3
7.19647	4.38	1.13558	49.3824	213.431	0	3
7.29303	5.68563	1.47409	53.404	83.3562	0	3
7.75268	3.85439	0.999311	61.7291	123.082	0	3
9.09209	5.29784	1.37355	61.2748	107.935	0	3
7.06651	4.78763	1.24127	55.3617	179.114	0	3
7.14307	4.90611	1.27199	50.8361	172.148	0	3
7.37057	5.09345	1.32056	50.6144	211.516	0	3
8.05245	6.73776	1.74687	65.641	186.117	0	3
8.262	5.334	1.38292	64.896	179.685	0	3
7.32109	4.49108	1.16438	53.022	205.124	0	3
7.36673	17.0404	4.418	88.3272	161.05	0	3
7.80079	9.86163	2.55678	62.0079	73.1451	0	3
7.24615	5.00947	1.29878	59.4852	164.493	0	3
6.43029	3.09856	0.80335	50.4423	170.812	0	3
7.52372	6.63163	1.71935	60.0912	72.6885	0	3
7.3204	3.39966	0.881416	60.6223	138.673	0	3
7.79276	4.75655	1.23321	92.5268	111.823	0	3
6.98925	3.19048	0.827181	61.7204	128.084	0	3
6.93282	3.08541	0.799942	62.6478	164.308	0	3
9.75388	11.804	3.06038	76.8475	58.283	0	3
7.40723	4.66747	1.21011	70.8012	129.799	0	3
6.83529	3.81925	0.990201	64.1711	154.164	0	3
13.9365	27.37	7.09609	81.5449	38.227	0	3
7.70293	4.09934	1.06282	64.2403	175.01	0	3
7.93177	5.5848	1.44795	76.4016	120.005	0	3
8.53289	5.52843	1.43333	73.3523	93.6927	0	3
11.3822	14.296	3.70646	87.7744	49.6027	0	3
12.0208	58.7961	15.2438	69.7485	18.1064	0	3
9.80632	11.4401	2.96601	67.3992	52.8839	0	3
8.72011	5.42301	1.406	70.6205	107.071	0	3
7.6394	3.34661	0.867661	71.2379	180.03	0	3
8.61136	7.44096	1.92918	67.9028	68.0357	0	3
7.17812	2.7604	0.715676	63.3409	161.264	0	3
9.28559	8.92052	2.31279	82.7031	79.6326	0	3
7.47917	4.43646	1.15022	69.7417	131.596	0	3
5.55967	9.98354	2.58839	49.3817	183.793	0	3
6.31028	12.4007	3.21508	56.9805	160.752	0	3
6.26124	11.3694	2.94769	52.9072	157.995	0	3
6.22175	2.37313	0.615272	74.6471	164.403	0	3
8.7412	6.70488	1.73835	65.1635	154.161	0	3
7.80156	3.88406	1.007	57.864	195.863	0	3
7.12778	3.93901	1.02125	60.3127	174.845	0	3
8.18024	4.04419	1.04852	63.8856	129.009	0	3
6.44652	2.31403	0.599949	89.0029	137.611	0	3
7.28599	4.15072	1.07614	58.5826	186.838	0	3
6.95533	3.58173	0.928619	66.5888	155.145	0	3
6.64887	2.82325	0.731972	51.0024	146.63	0	3
9.2022	8.44292	2.18896	84.1348	104.526	0	3
7.75694	11.1858	2.90008	65.651	64.6224	0	3
9.90094	44.8954	11.6398	67.5692	20.1635	0	3
6.85897	20.9329	5.42719	75.2959	129.809	0	3
6.43654	9.8145	2.54456	52.2232	93.8856	0	3
5.86816	2.04353	0.529818	74.3644	130.66	0	3
7.05527	3.15026	0.816754	77.9067	82.96	0	3
6.37149	18.0853	4.6889	82.2175	151.847	0	3
6.64746	4.24966	1.10179	59.8669	178.944	0	3
7.57054	4.5755	1.18627	64.6535	186.762	0	3
6.46789	4.49032	1.16418	60.5861	160.886	0	3
5.98318	2.14832	0.556985	68.5459	169.27	0	3
7.04167	3.47361	0.900588	53.1583	127.882	0	3
5.55556	1.78168	0.461928	80.8752	161.653	0	3
8.65065	4.44177	1.1516	91.2348	90.8214	0	3
8.51776	3.99813	1.03658	93.0561	83.9311	0	3
10.416	32.7316	8.48617	67.5626	30.0838	0	3
9.46307	72.7076	18.8506	73.6727	12.0736	0	3
8.97603	9.47712	2.45709	81.6503	60.6402	0	3
9.99012	26.169	6.78472	72.8221	45.5003	0	3
7.85173	4.26867	1.10672	76.4493	154.17	0	3
7.10669	3.46848	0.899257	65.2173	165.334	0	3
7.35669	4.63854	1.20261	86.4315	72.948	0	3
6.87161	3.35908	0.870894	53.1326	140.677	0	3
9.43352	25.619	6.64213	68.5196	35.2191	0	3
8.86789	14.6352	3.7944	70.7445	53.2532	0	3
5.84868	7.0235	1.82095	58.5489	200.66	0	3
5.2633	8.33954	2.16216	62.8431	189.739	0	3
8.35753	5.74866	1.49043	78.1196	113.442	0	3
7.38563	4.95085	1.28359	65.2297	152.609	0	3
7.67597	3.89767	1.01053	60.9581	173.586	0	3
6.80645	3.53436	0.916339	57.0687	134.761	0	3
9.34096	9.11111	2.3622	82.4074	71.3206	0	3
5.6484	2.73744	0.709725	81.855	103.63	0	3
5.37842	8.07386	2.09327	61.566	183.996	0	3
4.6598	4.37232	1.13359	55.2455	214.329	0	3
4.96558	8.85145	2.29488	65.9583	192.432	0	3
4.9188	7.53328	1.95312	65.9166	172.581	0	3
6.4141	14.8047	3.83835	94.8092	123.802	0	3
5.68766	7.15136	1.8541	73.2423	172.139	0	3
6.09621	11.6633	3.02388	82.8158	132.808	0	3
5.89706	5	1.29633	50.7265	90.2999	0	3
6.06304	11.3584	2.94484	74.5	145.061	0	3
10.8445	18.8182	4.87891	95.9545	19.3412	0	3
4.97783	6.7451	1.74877	69.3154	174.071	0	3
9.21315	82.8207	21.4726	71.9662	7.30011	0	3
10.5965	96.4152	24.9972	75.0889	18.8079	0	3
9.53469	86.088	22.3197	67.3029	4.15023	0	3
7.23924	32.5295	8.43379	87.1231	93.4907	0	3
65.6546	20.9575	3.98608	96.1359	116.964	1	4
126.633	29.8596	5.67924	85.0766	58.8357	1	4
84.5095	63.955	12.1641	77.413	20.8761	1	4
146.982	40.168	7.63989	77.495	32.7831	1	4
86.7246	12.1637	2.31351	80.1727	133.533	1	4
46.5295	14.4021	2.73925	84.6684	127.205	1	4
87.5176	37.7186	7.17401	87.9435	108.12	1	4
89.7449	28.0621	5.33736	76.2833	55.3156	1	4
53.4758	22.1988	4.22217	78.8627	89.42	1	4
90.4695	30.3836	5.77891	73.018	59.2937	1	4
60.8104	62.3199	11.8531	72.5837	45.6056	1	4
98.1036	44.6548	8.49326	58.0092	45.0651	1	4
68.7055	105.388	20.0447	70.9747	4.80833	1	4
104.567	18.908	3.59628	69.7294	139.296	1	4
57.9613	45.9664	8.74273	120.033	118.66	1	4
110.417	43.1719	8.21122	65.1132	56.8817	1	4
32.5856	70.7263	13.452	75.1627	41.82	1	4
153.041	82.9383	15.7747	76.3981	8.5	1	4
89.0568	24.9955	4.75409	92.317	94.5824	1	4
106.759	21.0611	4.00579	66.1043	78.2517	1	4
[truncated: 3,369 more rows]
