# Supplementary material for: The pattern of nodal morphogen signaling is shaped by co-receptor expression
Source: eLife. 2021 May 26;10:e54894. doi: 10.7554/eLife.54894 (PMC8266389; doi:10.7554/eLife.54894)
Supplement: Figure 3—source data 1. — The quantified fluorescence intensities are organized in this table. Each row corresponds to an individual nucleus. The following characteristics were quantified: average GFP pixel intensity (‘GFP’), average pixel intensity for α-pSmad2 staining (‘pSmad2Raw’), α-pSmad2 staining intensity normalized to background (‘pSmad2 Normalized’), average DAPI pixel intensity (‘DAPI’), distance from the embryonic margin in μm (‘marginDist’), GFP staining status (‘GFP_Flag’, 0 denotes a cell host nucleus, one denotes a sensor cell nucleus), and embryo replicate number (‘Embryo Number’). We note that normalized α-pSmad2 staining was used to generate the figure panel. [file elife-54894-fig3-data1.xlsx]

## Sheet: Sheet1
GFP	pSmad2Raw	pSmad2Normalized	DAPI	marginDist	GFP_Flag	EmbryoNumber
19.2905	3.23897	2.55549	67.3961	52.0244	1	1
52.2976	2.0442	1.61284	51.001	124.44	1	1
46.048	1.84634	1.45673	40.2125	95.084	1	1
31.4694	2.35569	1.8586	50.3528	80.9379	1	1
30.2322	5.21525	4.11475	45.3441	66.5228	1	1
39.6476	4.65309	3.67122	58.9342	60.0916	1	1
18.9708	1.82476	1.4397	40.4576	76.5491	1	1
16.597	3.65421	2.88311	43.7769	61.2019	1	1
38.3202	7.78692	6.14376	46.2525	44.4933	1	1
22.4668	3.05476	2.41016	30.3155	70.38	1	1
21.8664	1.95431	1.54192	45.7575	99.5033	1	1
37.1842	1.83804	1.45018	39.8722	99.7197	1	1
30.5065	2.58442	2.03906	42.4329	73.8082	1	1
53.8029	1.65064	1.30233	25.5689	97.92	1	1
29.517	1.04885	0.827523	31.749	132.685	1	1
40.585	1.9221	1.5165	34.4377	104.439	1	1
45.4777	6.24132	4.9243	29.3388	70.2188	1	1
13.8917	1.32909	1.04863	29.4013	110.788	1	1
9.67515	1.81138	1.42915	30.4311	109.345	1	1
24.4065	3.91906	3.09208	38.9209	51.2217	1	1
11.4764	1.57091	1.23942	29.6927	98.8137	1	1
15.5754	1.76812	1.39502	33.6507	91.5402	1	1
46.9478	13.021	10.2734	49.9369	22.0188	1	1
33.6638	1.69297	1.33572	29.1852	87.9812	1	1
43.1049	6.58267	5.19362	52.1152	52.4306	1	1
45.7305	12.0168	9.48106	42.9421	34.5464	1	1
22.6925	3.47814	2.7442	31.1932	72.0319	1	1
36.2083	3.48519	2.74976	55.1426	52.8577	1	1
46.7774	1.67808	1.32398	23.1164	103.004	1	1
37.8521	2.89724	2.28588	33.4211	75.4034	1	1
34.9939	1.46809	1.1583	30.3769	101.846	1	1
16.122	6.63193	5.23249	48.2506	49.8074	1	1
38.4385	6.14769	4.85043	32.2677	61.8249	1	1
48.5656	1.95697	1.54402	27.1947	99.7197	1	1
41.1912	7.37209	5.81646	35.6667	57.6889	1	1
17.7632	4	3.15594	27.891	71.2704	1	1
44.8938	1.41484	1.11629	27.9309	96.1984	1	1
47.3831	11.349	8.9542	47.5869	19.6201	1	1
67.7486	16.3111	12.8692	40.2708	36.2702	1	1
46.7305	1.60552	1.26673	31.224	117.473	1	1
16.6755	3.0902	2.43812	57.8098	47.8374	1	1
27.684	3.53528	2.78928	33.6748	65.2977	1	1
18.8328	2.62825	2.07364	26.724	85.1087	1	1
27.8288	2.70571	2.13476	23.9009	91.7383	1	1
33.4211	4.61741	3.64306	28.1134	75.362	1	1
43.3842	6.63054	5.23139	28.5419	62.9083	1	1
68.5302	6.30014	4.97071	36.641	46.7299	1	1
16.5192	2.47122	1.94976	59.1715	55.9628	1	1
29.4716	2.16321	1.70674	40.8368	72.42	1	1
11.8285	12.5024	9.86422	62.865	19.149	1	1
25.7989	2.87482	2.26819	26.7778	81.3844	1	1
47.9653	12.2508	9.66568	33.0142	42.8791	1	1
10.2901	2.58848	2.04227	27.463	96.872	1	1
19.913	7.1104	5.60999	46.6539	25.2723	1	1
27.1971	4.37736	3.45367	45.8344	47.3199	1	1
66.8447	10.4709	8.26135	28.4272	65.6631	1	1
71.5352	1.83803	1.45017	25.9595	96.7328	1	1
11.7592	1.58194	1.24813	25.3411	126.909	1	1
14.3467	6.45464	5.09261	36.6566	59.9211	1	1
28.08	3.83034	3.02208	27.6497	74.4817	1	1
10.8248	1.64815	1.30036	28.0783	114.297	1	1
28.3281	1.92383	1.51787	28.7871	120.214	1	1
30.9729	1.57083	1.23936	22.575	180.217	1	1
12.8702	4.88449	3.85378	37.1694	49.6924	1	1
16.6952	13.1402	10.3674	48.8666	34.0442	1	1
15.8234	1.99751	1.57601	24.0846	97.2905	1	1
53.0765	1.73469	1.36865	20.5587	122.628	1	1
24.98	2.61803	2.06558	31.4635	72.7711	1	1
36.8381	3.52834	2.7838	24.5202	78.54	1	1
12.3267	1.02993	0.812594	25.2419	96.9239	1	1
11.2643	2.22951	1.75905	28.9447	86.9211	1	1
16.2727	3.82616	3.01878	30.8947	70.858	1	1
37.8088	4.44742	3.50894	50.1702	39.8975	1	1
48.9276	2.39899	1.89276	33.5522	88.3804	1	1
23.4384	1.83524	1.44798	31.4484	87.5195	1	1
31.8944	1.0429	0.822835	21.7426	140.764	1	1
20.5371	4.60334	3.63196	49.2481	55.1178	1	1
21.0587	7.21175	5.68995	35.8429	67.08	1	1
39.274	3.79053	2.99067	25.4103	77.6064	1	1
31.3078	18.2433	14.3937	49.3771	24.2928	1	1
56.8538	5.69838	4.49593	32.4374	53.2846	1	1
16.7316	17.9175	14.1366	53.2189	38.8136	1	1
20.8894	2.12006	1.6727	34.9179	66.2756	1	1
50.7077	2.38895	1.88485	64.2796	66.5471	1	1
25.1023	1.84578	1.45629	23.8701	104.822	1	1
18.1832	3.42492	2.70221	26.7192	94.1284	1	1
21.6918	2.12007	1.6727	22.1129	119.747	1	1
8.44351	9.58817	7.56491	46.9071	34.6233	1	1
13.4733	1.4261	1.12517	25.9151	95.6748	1	1
33.8567	3.35823	2.64959	26.9939	85.0435	1	1
26.2974	1.40168	1.1059	45.0779	66.3035	1	1
30.7381	4.30781	3.39879	34.6003	48.28	1	1
58.3126	8.25259	6.51116	48.3685	39.4312	1	1
14.8996	1.87534	1.47961	38.6951	113.913	1	1
14.3971	4.1969	3.31129	44.6759	50.32	1	1
24.2811	1.34324	1.0598	19.8784	164.708	1	1
26.7271	2.3257	1.83494	44.9665	71.06	1	1
26.8243	5.6869	4.48687	29.6454	76.3094	1	1
45.032	3.84448	3.03323	27.9491	84.6818	1	1
19.0089	2.92308	2.30626	29.5414	102.948	1	1
20.5172	5.76688	4.54997	36.2089	64.6939	1	1
24.4128	1.51645	1.19645	27.0362	100.98	1	1
43.2516	1.47702	1.16535	21.9781	124.167	1	1
58.8396	2.16792	1.71045	31.913	98.6211	1	1
19.5199	1.83792	1.45009	22.9419	110.304	1	1
13.5698	2.25791	1.78146	37.0903	94.3002	1	1
14.9106	1.118	0.882082	31.435	106.08	1	1
44.8219	1.60822	1.26886	21.6877	139.173	1	1
17.8381	1.89905	1.49832	28.7295	106.787	1	1
20.4885	2.21777	1.74978	30.2407	85.3732	1	1
14.287	13.8043	10.8914	42.5713	48.7482	1	1
13.9801	11.8739	9.36831	41.6759	42.8184	1	1
11.8565	23.2502	18.3441	44.7517	26.288	1	1
44.0013	5.78834	4.56691	39.6578	55.624	1	1
47.6157	2.83352	2.2356	40.366	76.1668	1	1
41.6469	1.83412	1.44709	25.8246	114.546	1	1
46.0071	2.92495	2.30774	32.8621	109.563	1	1
45.8231	2.45641	1.93807	32.5282	93.84	1	1
30.3467	5.96108	4.7032	32.6745	69.4882	1	1
30.5819	7.45151	5.87912	40.438	58.635	1	1
25.9161	5.44585	4.29669	42.5493	78.7773	1	1
15.0263	2.45465	1.93668	24.9714	138.951	1	1
51.019	5.03537	3.97283	38.3728	43.1854	1	1
34.9679	5.54459	4.37459	38.4935	50.3131	1	1
30.2131	1.52841	1.20589	37.4091	130.071	1	1
37.6367	1.72381	1.36006	27.0259	116.156	1	1
25.8977	2.72315	2.14853	40.7349	84.1945	1	1
48.1461	4.01573	3.16835	32.5393	102.133	1	1
18.0966	5.33225	4.20706	44.4788	63.2665	1	1
54.6645	2.85463	2.25226	25.8498	124.147	1	1
23.3047	1.79408	1.4155	27.9337	124.44	1	1
15.4477	2.85076	2.24921	44.3452	70.7077	1	1
48.6868	2.08607	1.64588	33.795	108.327	1	1
22.8492	2.20507	1.73976	41.7551	86.3158	1	1
18.1762	0.834337	0.658279	37.7605	102	1	1
39.4303	1.96107	1.54725	30.5369	73.179	1	1
34.2824	4.34662	3.42942	44.5249	69.763	1	1
18.3195	3.40636	2.68757	40.6328	142.237	1	1
23.717	2.55316	2.0144	48.5359	60.3114	1	1
4.82948	2.01874	1.59275	67.9176	87.4124	0	1
4.21478	3.9244	3.09629	69.4811	72.8108	0	1
3.89739	1.39552	1.10104	39.6511	196.323	0	1
5.1474	1.8861	1.4881	45.0268	102.613	0	1
3.94719	1.10112	0.868769	42.2067	185.511	0	1
4.0607	1.72843	1.36371	88.2875	80.6839	0	1
4.60341	5.03893	3.97563	62.764	46.18	0	1
4.23708	1.73262	1.36701	67.2567	67.5608	0	1
4.53718	2.72586	2.15066	67.0699	57.9737	0	1
3.88444	0.899846	0.709964	33.7766	204.286	0	1
4.12653	1.22449	0.966103	39.1041	166.824	0	1
5.10462	2.06569	1.6298	85.0097	76.3699	0	1
4.72932	2.51754	1.9863	62.3734	87.8445	0	1
3.68056	2.11574	1.66929	66.6404	40.5342	0	1
4.26375	1.24272	0.980485	41.2168	195.512	0	1
4.42582	1.65125	1.30281	43.0154	153.389	0	1
3.78384	1.35354	1.06792	43.5172	126.328	0	1
4.3118	1.26281	0.996334	56.951	183.616	0	1
5.18612	2.53312	1.99859	58.5615	98.8798	0	1
4.2559	1.84755	1.45769	50.2396	172.574	0	1
4.4702	1.25386	0.989278	33.3466	160.533	0	1
4.28986	1.56522	1.23493	46.2484	143.905	0	1
4.13317	1.2873	1.01566	43.4118	193.44	0	1
4.5586	2.43766	1.92327	52.0985	114.54	0	1
4.53368	2.10535	1.66109	45.285	132.435	0	1
4.80864	3.35494	2.64699	61.2099	87.9503	0	1
4.67305	2.33589	1.84298	60.143	66.9835	0	1
4.01471	1.30882	1.03264	37.4076	155.113	0	1
4.08909	1.44321	1.13867	37.5033	166.968	0	1
3.66058	0.771689	0.608851	62.2938	206.984	0	1
5.1495	2.09077	1.64958	52.4928	121.897	0	1
4.45512	1.72756	1.36302	42.0047	108.274	0	1
4.69094	1.54622	1.21994	47.3996	184.654	0	1
3.93532	1.31343	1.03628	39.6144	148.623	0	1
3.67167	0.918455	0.724646	41.3155	174.77	0	1
4.30261	1.24449	0.981882	33.5945	196.107	0	1
4.09029	1.54402	1.21821	36.7178	136.232	0	1
4.87721	2.65376	2.09377	49.1582	90.6908	0	1
4.44523	2.05427	1.62079	43.8864	168.314	0	1
4.51733	6.6932	5.28082	73.1142	50.8252	0	1
3.32765	3.9502	3.11664	64.768	38.7063	0	1
4.61194	2.05784	1.6236	47.7854	116.835	0	1
4.57785	1.8443	1.45512	45.7657	130.957	0	1
3.99016	1.25591	0.990889	76.0394	101.597	0	1
4.19927	2.34735	1.85202	55.1627	77.5207	0	1
4.4	1.57826	1.24522	42.4	153.765	0	1
3.85873	0.871191	0.687356	57.5443	210.785	0	1
4.18885	1.07921	0.851483	33.0501	199.239	0	1
5.18114	3.15881	2.49225	60.2643	89.5285	0	1
4.09343	1.19562	0.943325	41.565	164.84	0	1
4.86712	4.01126	3.16482	59.6227	66.5541	0	1
4.08402	1.30478	1.02945	31.8962	221.598	0	1
4.72776	2.15671	1.70161	46.502	126.744	0	1
4.33841	1.33503	1.05331	46.7733	175.146	0	1
4.62804	1.64654	1.2991	50.7537	185.83	0	1
4.14087	4.93498	3.89362	60.2601	56.8451	0	1
4.25589	1.7138	1.35216	46.633	141.32	0	1
4.10081	1.35081	1.06576	36.5645	197.255	0	1
4.90575	3.13586	2.47415	48.8164	89.6698	0	1
4.34451	1.76982	1.39636	55.5701	105.3	0	1
4.23148	1.18519	0.935092	37.0185	153.236	0	1
5.19679	3.00837	2.37356	58.9972	80.24	0	1
4.52496	2.01288	1.58813	50.6264	124.937	0	1
3.98708	1.36176	1.0744	52.9793	220.758	0	1
4.57116	1.57678	1.24405	45.191	173.133	0	1
4.27383	1.1785	0.929817	37.144	163.992	0	1
4.1957	2.75699	2.17522	66.0129	58.82	0	1
4.06838	1.01923	0.804157	36.3825	184.399	0	1
4.424	1.4752	1.16391	41.6944	146.542	0	1
4.21368	1.45641	1.14908	67.4325	97.92	0	1
4.39831	1.98305	1.5646	45.2814	135.32	0	1
4.87971	2.0058	1.58254	47.4986	115.26	0	1
4.08702	1.32301	1.04383	34.1091	205.633	0	1
3.96	1.62087	1.27884	81.4591	71.4	0	1
5.08939	1.86173	1.46888	46.5852	170.282	0	1
4.1336	1.17409	0.926337	35.2186	196.947	0	1
4.78854	1.95634	1.54352	43.8035	126.491	0	1
4.32471	1.42353	1.12314	35.5718	153.019	0	1
4.65132	1.625	1.2821	39.0428	164.279	0	1
4.52859	1.80813	1.42659	38.4587	217.342	0	1
5.04087	4.16731	3.28794	53.0805	80.085	0	1
4.48302	1.82453	1.43952	38.6396	182.332	0	1
4.55072	4.07143	3.21229	51.087	65.2277	0	1
5.21922	2.98241	2.35307	47.3532	92.8698	0	1
4.21622	1.24865	0.985164	38.7586	198.5	0	1
4.34864	2.1076	1.66287	45.3113	115.388	0	1
4.40337	1.57975	1.2464	44.934	171.143	0	1
4.26916	1.25134	0.987285	67.6292	138.323	0	1
5.36837	2.78496	2.19729	48.785	86.5766	0	1
4.55922	1.60406	1.26558	36.121	124.669	0	1
4.34291	1.78352	1.40717	40.454	158.886	0	1
4.51648	1.61813	1.27668	39.1992	221.697	0	1
5.53958	1.99792	1.57632	42.7687	102.17	0	1
4.16858	1.12766	0.889705	29.4517	206.172	0	1
4.62951	1.7918	1.4137	41.1475	186.581	0	1
4.85099	1.65066	1.30235	37.3576	113.542	0	1
4.65084	8.39969	6.62722	50.2971	49.0932	0	1
4.18587	1.24164	0.979631	37.6543	196.439	0	1
5.42308	4.99038	3.93733	51.893	76.8859	0	1
4.74855	1.3396	1.05692	36.1142	151.295	0	1
3.78645	1.06776	0.842447	34.2608	231.632	0	1
4.54754	1.71148	1.35033	34.8934	168.633	0	1
4.31369	0.963376	0.760088	40.8694	213.524	0	1
4.64542	1.67729	1.32335	32.0735	125.501	0	1
3.80065	1.05882	0.835395	51.8399	191.502	0	1
5.60802	1.96759	1.5524	35.804	107.027	0	1
4.26622	1.10305	0.870291	36.291	201.841	0	1
4.69032	1.28172	1.01126	45.3011	177.638	0	1
4.78072	1.7465	1.37796	35.6345	113.689	0	1
4.71683	1.30099	1.02646	37.6198	222.256	0	1
4.58692	1.60241	1.26428	40.3614	166.402	0	1
5.14634	1.60976	1.27007	35.838	211.067	0	1
4.32718	1.16623	0.920134	37.4354	134.655	0	1
5.05025	1.38191	1.0903	53.9874	181.659	0	1
4.54858	1.0749	0.848078	58.1964	197.034	0	1
4.34034	1.40153	1.10578	32.8088	155.359	0	1
4.78831	2.29032	1.80703	39.4778	116.767	0	1
5.61191	1.76895	1.39568	35.3899	96.7573	0	1
5.01354	1.26769	1.00019	35.2757	215.949	0	1
4.45343	0.602941	0.475711	51.3064	226.954	0	1
5.12363	2.01252	1.58785	51.0579	141.975	0	1
5.49791	1.87238	1.47728	42.4372	194.596	0	1
4.6292	1.58309	1.24904	36.5274	122.134	0	1
4.29286	1.32619	1.04634	47.3238	131.756	0	1
4.99649	1.99297	1.57242	44.7592	148.819	0	1
4.74038	1.91731	1.51273	45.9365	177.093	0	1
6.02592	1.50756	1.18944	61.8035	221.022	0	1
4.89946	1.39674	1.102	39.6793	205.504	0	1
4.42123	1.60033	1.26264	42.9303	194.708	0	1
4.72842	1.89928	1.4985	45.9371	161.903	0	1
4.63977	1.52161	1.20053	53.5303	109.918	0	1
5.94237	2.51466	1.98403	38.3953	90.6073	0	1
4.57067	1.41333	1.1151	56.6373	177.25	0	1
3.95098	0.82598	0.651685	49.5809	211.315	0	1
4.66495	1.93814	1.52916	43.1237	199	0	1
4.76876	1.61663	1.2755	35.6491	147.142	0	1
4.35122	1.23902	0.97757	50.4951	166.595	0	1
4.60971	2.11068	1.66529	36.7903	107.243	0	1
4.45397	1.64127	1.29494	40.8603	181.577	0	1
4.41629	1.39819	1.10315	39.638	158.872	0	1
4.69478	1.42771	1.12644	38.8353	137.872	0	1
4.78025	1.98331	1.5648	40.3505	127.849	0	1
4.47434	1.03344	0.815365	28.4448	202.793	0	1
4.07033	1.31209	1.03522	49.0484	191.408	0	1
4.29412	0.978328	0.771885	55.5573	213.804	0	1
5.32149	1.68528	1.32966	35.8799	92.027	0	1
4.14219	1.09091	0.86071	36.0559	171.221	0	1
4.34416	1.08766	0.858148	58.3133	152.926	0	1
3.89679	0.954128	0.752792	50.6766	182.946	0	1
5.24365	2.29949	1.81426	38.181	79.8501	0	1
5.30878	1.63765	1.29208	39.0379	133.28	0	1
4.95672	1.42687	1.12577	51.2567	221.899	0	1
4.61092	1.47359	1.16264	33.4085	118.556	0	1
5.09238	1.30716	1.03133	41.1374	201.345	0	1
4.46275	1.07255	0.846224	34.3745	210.493	0	1
4.46944	1.26667	0.99938	47.2417	187.336	0	1
4.7651	1.52013	1.19936	51.1225	171.005	0	1
4.9555	1.49415	1.17886	43.7635	122.402	0	1
4.67823	1.06744	0.842191	41.3449	131.877	0	1
5	1.22745	0.968439	41.3667	193.322	0	1
4.87168	2.24336	1.76998	41.3068	91.4265	0	1
4.25711	0.852713	0.672777	42.5284	220.824	0	1
5.07167	2.14334	1.69106	42.6451	156.223	0	1
5.66051	1.49858	1.18236	38.6307	143.271	0	1
4.25163	1.31887	1.04057	39.2798	203.036	0	1
4.99674	1.71661	1.35438	46.9446	111.185	0	1
4.73483	1.2764	1.00706	48.1034	130.9	0	1
4.54257	1.22538	0.966802	32.985	177.14	0	1
5.08186	1.31195	1.03511	36.9602	191.42	0	1
4.7619	1.35779	1.07127	38.2471	164.56	0	1
4.86226	1.67004	1.31763	34.484	154.369	0	1
4.4442	0.953125	0.752	65.3817	208.442	0	1
5.40073	1.98782	1.56836	38.3252	118.709	0	1
4.67391	1.64312	1.29639	38.8116	139.11	0	1
4.69728	1.15476	0.911089	34.8622	198.277	0	1
4.82737	3.33053	2.62773	50.7649	65.5354	0	1
5.01085	2.67028	2.10681	41.4233	79.8797	0	1
4.89101	1.56979	1.23854	38.6711	171.523	0	1
4.93914	0.893092	0.704635	33.1957	217.114	0	1
5.02465	1.16989	0.923028	38.8239	146.994	0	1
4.91993	1.20463	0.950431	35.0979	120.176	0	1
5.42458	1.65363	1.30469	41.5447	109.012	0	1
4.47548	1.43497	1.13217	37.9318	205.156	0	1
4.73558	1.24038	0.978644	41.4832	188.862	0	1
5.69637	1.46205	1.15353	44.6056	173.269	0	1
5.30619	1.55849	1.22962	41.6479	213.156	0	1
5.11473	1.32488	1.04531	39.1365	224.178	0	1
5.13772	1.79499	1.41622	40.7825	129.841	0	1
5.03286	1.57512	1.24274	40.9085	162.41	0	1
3.99677	1.61613	1.2751	50.9742	90.2852	0	1
4.93878	2.11503	1.66872	36.5158	80.4996	0	1
4.97884	1.13757	0.897521	51.2884	148.002	0	1
5.7061	1.59335	1.25712	46.6451	201.772	0	1
4.5906	1.47987	1.16759	52.849	105.554	0	1
4.80738	1.20385	0.94982	35.0032	192.837	0	1
4.45175	1.17544	0.927402	38.1711	214.08	0	1
4.9002	1.20774	0.952887	39.2505	157.728	0	1
4.94725	1.52747	1.20515	37.3297	114.331	0	1
5.3382	1.38443	1.09229	54.9659	124.435	0	1
6.18519	2.36526	1.86615	43.9374	103.357	0	1
5.28045	1.16431	0.918619	42.4164	213.179	0	1
4.81489	1.50905	1.19062	51.4406	137.894	0	1
5.26545	1.68545	1.3298	49.0364	167.955	0	1
4.81731	2.29808	1.81315	33.5769	67.2006	0	1
4.90598	1.80983	1.42793	38.9936	91.386	0	1
4.66135	1.10159	0.86914	37.1076	194.462	0	1
4.44807	0.970326	0.765572	47.8398	112.915	0	1
5.37412	1.49508	1.17959	40.8115	155.572	0	1
4.96951	2.16463	1.70786	38.0407	77.9609	0	1
5.86175	1.24424	0.981685	38.6037	123.146	0	1
4.8445	1.22249	0.964523	39.8445	177.152	0	1
5.17521	1.63105	1.28688	37.3476	104.005	0	1
5.03436	1.34364	1.06011	44.9485	208.254	0	1
5.60469	1.42656	1.12553	45.6094	217.944	0	1
5.51244	1.76119	1.38955	45.33	132.456	0	1
6.69465	1.36861	1.07981	47.0292	164.99	0	1
5.77844	1.23353	0.973238	42.4446	194.326	0	1
5.30542	1.02791	0.811008	36.0509	147.446	0	1
5.5812	1.4806	1.16817	35.6272	116.52	0	1
4.85771	1.24506	0.982332	37.664	181.714	0	1
4.81639	2.34918	1.85347	36.3967	70.4793	0	1
5.11311	1.18252	0.932989	40.6234	172.048	0	1
4.8961	1.23088	0.971145	54.5238	102.694	0	1
4.12462	1.03343	0.815363	53.1459	80.5865	0	1
4.75593	3.88249	3.06322	51.0226	39.5337	0	1
4.84626	1.46537	1.15616	47.2285	148.279	0	1
5.17208	1.71841	1.3558	38.4091	159.225	0	1
5.22222	1.50687	1.18889	47.98	142.676	0	1
4.50235	1.48709	1.17329	39.5505	172.889	0	1
3.08621	3.84698	3.03521	57.7694	27.5253	0	1
4.19225	1.2391	0.977626	46.9532	179.139	0	1
4.94562	3.57547	2.82099	66.4628	52.9265	0	1
4.5046	1.29655	1.02296	40.6954	207.671	0	1
4.74382	1.51011	1.19145	66.9798	68.5975	0	1
4.18414	1.66263	1.31179	53.4731	59.2586	0	1
3.83301	1.4082	1.11105	76.1445	45.5879	0	1
5.49757	2.94165	2.32092	58.6596	79.459	0	1
4.77883	3.60821	2.84682	63.0521	64.0248	0	1
4.35334	1.11869	0.882629	42.0778	219.509	0	1
5.29418	2.44277	1.92731	55.3253	60.6402	0	1
5.19123	1.57193	1.24023	38.8737	148.267	0	1
4.02564	1.39927	1.104	44.6923	140.431	0	1
5.33996	1.57866	1.24554	39.7143	114.63	0	1
4.22163	1.15754	0.913283	35.8531	162.205	0	1
5.70493	4.0759	3.21582	59.7638	51.6643	0	1
4.21989	0.81262	0.641144	33.6157	207.778	0	1
4.4726	6.46869	5.10369	55.0851	42.16	0	1
4.7203	1.375	1.08485	33.7438	158.425	0	1
4.85401	2.13431	1.68393	40.8847	89.76	0	1
4.78383	2.05975	1.62511	35.7821	109.204	0	1
4.16838	2.61602	2.06399	62.6982	46.8966	0	1
4.30346	1.76782	1.39478	59.5886	56.7963	0	1
4.02059	1.47025	1.16001	34.6716	227.304	0	1
3.56844	7.27235	5.73776	46.4008	32.7267	0	1
4.51023	5.28418	4.16913	57.1023	42.3911	0	1
4.86207	1.21767	0.960724	37.9461	207.974	0	1
5.40533	1.74112	1.37372	35.4172	96.2867	0	1
4.3056	6.05598	4.77807	50.3298	41.5927	0	1
3.81011	9.41899	7.43143	53.4778	24.14	0	1
3.95111	1.10667	0.873142	43.1967	223.248	0	1
4.38513	1.50199	1.18505	30.8234	131.025	0	1
5.41245	3.17899	2.50817	44.2853	80.2861	0	1
4.26772	0.958661	0.756368	30.876	187.139	0	1
4.5774	0.850123	0.670733	45.3931	207	0	1
5.234	1.17881	0.930061	32.8985	137.616	0	1
4.86768	1.49063	1.17608	35.1019	183.872	0	1
4.21192	0.89404	0.705383	47.457	223.968	0	1
4.8121	1.19904	0.946027	33.1831	144.679	0	1
5.21766	2.06697	1.63081	31.4505	108.848	0	1
4.59971	1.44833	1.14271	34.2023	207.741	0	1
5.67683	2.01982	1.5936	39.1966	140.852	0	1
6.09578	2.52452	1.9918	33.8267	79.9	0	1
5.64571	1.79	1.41228	38.8171	102.34	0	1
5.43028	8.23838	6.49995	40.6942	52.7011	0	1
5.17324	3.95341	3.11917	45.2246	53.7211	0	1
4.87033	1.16264	0.917302	35.0462	134.251	0	1
5.1619	1.48889	1.17471	32.7095	154.808	0	1
4.41825	0.910646	0.718485	38.8612	137.399	0	1
5.21033	1.48831	1.17426	34.4108	124.1	0	1
4.98313	1.31902	1.04068	34.1273	177.804	0	1
4.93218	1.08675	0.857429	31.7303	138.723	0	1
5.11796	1.26249	0.996082	33.4835	205.417	0	1
4.97831	3.03995	2.39848	36.5502	57.2423	0	1
4.70429	1.03558	0.817058	37.1239	171.9	0	1
5.52514	1.36034	1.07328	40.2165	181.614	0	1
5.74372	2.53769	2.0022	35.3869	78.1512	0	1
4.7747	1.60277	1.26456	31.251	96.0131	0	1
4.55185	0.835518	0.659211	35.5375	195.557	0	1
2.84178	2.40974	1.90124	42.1886	41.8808	0	1
5.05818	1.21855	0.961419	34.7972	187.383	0	1
4.98773	0.924847	0.729689	49.1534	147.462	0	1
5.04793	4.45765	3.51701	38.021	54.7822	0	1
3.93972	3.86862	3.05228	46.3261	46.6804	0	1
5.39344	1.84352	1.45451	34.8137	95.1283	0	1
4.9521	0.898403	0.708826	31.7025	214.217	0	1
5.12865	1.40741	1.11042	35.2144	162.209	0	1
4.21561	0.83767	0.660908	43.57	177.195	0	1
5.02877	5.93868	4.68552	73.6311	29.2479	0	1
5.14478	3.02068	2.38327	56.4326	61.0676	0	1
5.27149	3.28808	2.59425	63.8793	89.2492	0	1
5.28906	3.1862	2.51386	62.8737	93.0414	0	1
4.78512	1.25413	0.98949	46.9112	134.992	0	1
4.69697	1.51872	1.19824	39.4153	150.939	0	1
4.33523	1.11932	0.883124	32.5265	148.251	0	1
4.73975	2.02839	1.60037	39.4054	93.7839	0	1
3.77203	5.38329	4.24733	58.3524	24.2999	0	1
4.35194	1.28929	1.01723	39.6105	184.064	0	1
5.22704	1.6824	1.32738	50.6492	83.9717	0	1
4.51026	2.02599	1.59848	41.3899	141.871	0	1
5.135	7.53889	5.94806	69.1511	32.7972	0	1
4.81081	1.3964	1.10173	35.2631	131.422	0	1
4.51004	1.39558	1.10109	37.2008	141.323	0	1
4.60478	2.19818	1.73433	90.9818	45.051	0	1
4.77563	1.59733	1.26026	76.1709	78.0816	0	1
4.61944	1.41516	1.11654	38.0857	103.647	0	1
4.48561	1.32914	1.04867	33.1079	155.707	0	1
5.26201	5.06824	3.99876	60.9815	38.9504	0	1
4.50536	1.32306	1.04387	29.8606	188.732	0	1
3.05792	7.14184	5.6348	74.3002	22.6068	0	1
4.63957	7.76684	6.12792	54.7176	31.62	0	1
4.94508	2.01602	1.59061	64.8558	64.26	0	1
4.325	0.861364	0.679602	32.175	144.941	0	1
4.45278	1.41268	1.11458	46.0065	191.393	0	1
4.6686	1.34456	1.06083	30.4387	132.264	0	1
4.6052	0.926471	0.73097	36.2783	177.962	0	1
4.83989	5.91308	4.66533	62.6743	34.68	0	1
4.80072	1.91921	1.51423	36.7971	121.04	0	1
4.70141	1.84778	1.45786	75.9473	51.34	0	1
4.87763	1.10878	0.874807	51.6329	99.3085	0	1
4.79	1.55286	1.22518	29.7671	134.003	0	1
4.84477	1.44043	1.13648	33.6606	115.842	0	1
6.43574	3.83354	3.0246	46.8543	73.0771	0	1
4.73121	9.47206	7.4733	56.948	25.7257	0	1
4.17163	0.968476	0.764112	28.6865	229.204	0	1
4.82316	1.50763	1.1895	34.3804	142.532	0	1
4.56888	1.08929	0.859429	43.1173	206.72	0	1
4.85979	1.49735	1.18139	35.0026	157.962	0	1
5.37441	1.30806	1.03204	33.455	164.334	0	1
4.87097	1.73226	1.36672	34.1065	190.668	0	1
5.43294	1.42615	1.12521	36.2207	175.346	0	1
4.75	1.15278	0.909523	48.059	116.543	0	1
4.7084	1.33619	1.05423	30.2539	137.572	0	1
4.91263	1.31851	1.04028	29.498	155.983	0	1
4.77329	1.20387	0.949831	33.9438	115.162	0	1
5.26728	1.40939	1.11198	35.1538	194.297	0	1
4.98549	1.4591	1.15121	38.6359	119.736	0	1
5.50063	2.12579	1.67721	36.5346	101.64	0	1
4.81487	1.42857	1.12712	33.9577	217.639	0	1
4.84105	1.14815	0.90587	32.8056	171.797	0	1
4.40583	0.912621	0.720044	34.7942	173.848	0	1
5.54796	2.05256	1.61944	37.3929	91.2626	0	1
5.13555	1.46888	1.15892	33.1964	214.881	0	1
3.33058	7.70523	6.07931	49.405	22.4426	0	1
4.976	1.68667	1.33075	32.6147	85.7616	0	1
5.65798	1.32669	1.04673	32.8834	107.119	0	1
4.78608	0.724051	0.571264	38.3215	127.215	0	1
4.98312	1.11533	0.879978	42.8734	101.282	0	1
4.90164	1.08333	0.854733	41.9016	186.314	0	1
5.25926	1.94302	1.53301	35.1638	169.707	0	1
4.77059	1.66863	1.31652	47.3314	64.0573	0	1
5.71698	1.40836	1.11117	39.7035	136.36	0	1
4.87568	0.929633	0.733465	33.6255	115.988	0	1
4.85507	1.04589	0.825193	43.7633	130.818	0	1
4.79749	0.977035	0.770865	38.0355	125.829	0	1
4.53402	2.0433	1.61213	55.0062	69.0275	0	1
3.98682	1.04613	0.825379	37.2554	200.353	0	1
4.34073	1.6188	1.27721	36.953	188.876	0	1
5.14021	4.15344	3.277	51.119	41.7522	0	1
4.52246	2.36407	1.86521	66.156	76.7504	0	1
4.94595	2.75507	2.1737	75.4662	30.8577	0	1
4.28499	1.32884	1.04843	29.0826	197.083	0	1
4.95518	3.08787	2.43628	59.471	38.9593	0	1
4.05801	1.31768	1.03963	30.7597	205.51	0	1
4.49066	1.08489	0.855961	31.8998	155.707	0	1
4.21604	1.06056	0.836762	31.9738	178.492	0	1
4.93176	0.930446	0.734107	48.7008	112.248	0	1
4.29352	1.31766	1.03961	32.7306	206.928	0	1
5.38453	9.41721	7.43003	56.219	28.6973	0	1
3.95444	1.00719	0.79466	50.9041	138.923	0	1
4.47258	0.93871	0.740627	28.5177	166.413	0	1
4.51911	1.11871	0.882646	30.4547	177.099	0	1
5.35148	1.39502	1.10065	31.8491	122.729	0	1
4.77476	1.39615	1.10154	30.2864	151.544	0	1
4.41078	1.46085	1.15259	34.0295	206.519	0	1
4.79356	1.8222	1.43768	39.9988	96.3359	0	1
5.17572	1.51917	1.1986	34.9281	117.181	0	1
4.70927	1.25399	0.989381	29.476	137.111	0	1
4.56419	1.51922	1.19864	28.8446	111.52	0	1
5.08679	1.37306	1.08332	41.5751	73.1	0	1
4.44681	1.2791	1.00919	32.6871	213.439	0	1
4.37449	0.870445	0.686767	40.8381	222.991	0	1
4.21918	0.674969	0.53254	38.8331	149.26	0	1
4.13289	1.04485	0.82437	28.2243	206.025	0	1
3.89119	9.76891	7.70751	51.2736	12.0736	0	1
4.79665	6.22939	4.91489	52.0422	26.1601	0	1
4.58199	1.08682	0.857481	26.1399	109.735	0	1
4.92946	2.36307	1.86442	37.778	173.831	0	1
4.41775	1.29765	1.02383	31.3316	136.904	0	1
4.62308	5.47821	4.32222	40.9731	52.2074	0	1
4.35125	1.59764	1.26051	30.616	216.549	0	1
5.50369	8.40674	6.63279	55.1802	34.7166	0	1
5.609	1.78791	1.41064	30.2701	105.062	0	1
4.61853	0.836207	0.659754	34.4375	160.098	0	1
5.24615	1.6014	1.26348	33.2014	106.916	0	1
4.7866	1.32866	1.04829	31.3474	217.992	0	1
4.5672	1.082	0.853684	33.7995	188.537	0	1
4.49561	0.942982	0.743998	36.5	159.251	0	1
4.68687	1.56566	1.23528	31.3495	222.982	0	1
4.99655	1.6943	1.33678	32.4819	82.2217	0	1
4.39177	0.694805	0.54819	28.0952	201.656	0	1
4.92697	2.54307	2.00644	30.4082	73.6169	0	1
4.53519	0.748148	0.590277	31.0278	155.327	0	1
5.17794	1.21471	0.958383	31.7	147.703	0	1
4.63139	0.939781	0.741472	42.9361	106.016	0	1
4.73826	0.838926	0.661899	44.9966	122.379	0	1
5.06867	1.33047	1.04972	28	74.8433	0	1
5.33723	5.7927	4.57035	45.9971	45.1432	0	1
5.40857	1.38571	1.09331	38.8429	69.7796	0	1
4.98113	1.39757	1.10266	33.31	200.303	0	1
4.74371	9.53029	7.51925	64.4632	17.6538	0	1
4.61629	7.78885	6.14528	74.0161	23.4403	0	1
4.78736	2.23671	1.76473	54.2156	67.6737	0	1
4.57364	1.52159	1.20051	49.7619	74.5159	0	1
4.46819	1.72774	1.36316	32.0865	137.082	0	1
4.49713	1.55316	1.22542	35.8693	129.816	0	1
4.99776	1.86869	1.47436	41.7464	91.1739	0	1
5.02043	1.61294	1.27258	45.1396	76.1661	0	1
5.0574	1.29801	1.02411	32.0199	109.416	0	1
5.13043	3.35072	2.64367	64.7971	39.2475	0	1
4.09709	1.16828	0.921758	32.5113	217.308	0	1
5.19024	7.45286	5.88019	61.4588	19.72	0	1
3.94552	1.21441	0.958151	28.6415	199.65	0	1
4.61026	0.959778	0.75725	40.7753	121.04	0	1
5.19315	1.36552	1.07738	36.7612	86.063	0	1
5.38451	5.05874	3.99127	48.8571	40.1502	0	1
4.55241	2.05666	1.62267	29.9618	187.297	0	1
4.17836	0.953908	0.752618	29.2004	203.119	0	1
4.56622	1.10173	0.869245	32.8234	185.569	0	1
4.70276	2.78556	2.19776	74.5403	35.2978	0	1
4.90984	7.73607	6.10363	57.1328	19.72	0	1
4.6382	1.0382	0.819125	31.2674	194.518	0	1
4.55233	1.18411	0.934243	26.2035	146.962	0	1
4.57895	1.5653	1.235	26.8129	117.623	0	1
4.50244	1.02276	0.806945	29.5268	224.341	0	1
4.22932	0.729323	0.575424	31.8008	226.086	0	1
4.36364	0.768025	0.605959	39.0627	157.18	0	1
4.42609	1.66232	1.31154	28.9319	182.423	0	1
3.59009	9.22072	7.275	51.1171	14.62	0	1
4.74576	0.91395	0.721092	28.352	221.001	0	1
4.70049	0.94108	0.742497	29.9525	220.779	0	1
4.75028	1.0674	0.842164	32.6983	90.4483	0	1
4.61927	0.518349	0.408969	39.1651	162.042	0	1
3.81937	1.01309	0.799311	36.301	216.081	0	1
6.31988	2.13833	1.68711	43.9424	111.699	0	1
4.07086	1.11497	0.879696	28.262	206.887	0	1
5.11973	1.45676	1.14936	34.1175	136.653	0	1
4.36842	1.18301	0.933379	30.6519	174.856	0	1
4.79909	1.70997	1.34914	40.5559	84.7712	0	1
4.8428	1.90341	1.50176	34.2841	143.976	0	1
4.56063	1.33381	1.05235	37.6976	94.7551	0	1
5.05397	2.40423	1.8969	57.1376	52.849	0	1
3.85927	1.31457	1.03717	32.9536	216.101	0	1
4.20545	1.01258	0.798908	66.0377	63.3322	0	1
4.6558	1.85688	1.46505	39.433	100.959	0	1
4.10399	1.2773	1.00777	29.3934	215.818	0	1
5.37519	9.20121	7.25961	68.1649	25.5204	0	1
4.46325	1.16782	0.921393	36.2011	85.907	0	1
4.32664	0.874163	0.689701	61.7189	67.0843	0	1
4.04425	0.926991	0.731381	28.3031	148.711	0	1
4.77133	2.7654	2.18186	43.9645	69.6295	0	1
4.71798	4.80194	3.78865	81.3122	15.0985	0	1
4.10544	1.18781	0.937162	28.2323	232.472	0	1
4.65499	1.26719	0.999789	27.5305	114.243	0	1
5.25692	4.77385	3.76649	38.9908	55.1848	0	1
4.86435	0.944348	0.745075	28.4748	173.982	0	1
4.60507	0.766021	0.604378	37.7794	135.842	0	1
4.54839	0.836228	0.659771	34.7494	162.591	0	1
4.71154	1.5467	1.22032	35.5632	70.858	0	1
4.52638	0.734878	0.579807	32.565	102.706	0	1
2.90814	4.85827	3.8331	45.8714	6.25082	0	1
5.04379	2.53234	1.99798	67.8136	47.9123	0	1
4.02814	0.996248	0.786023	65.6154	56.002	0	1
5.08	1.56667	1.23607	31.7083	123.375	0	1
4.4354	4.11111	3.2436	102.363	19.4038	0	1
4.18952	0.912634	0.720054	27.4328	189.585	0	1
4.34586	1.03509	0.816668	29.8972	166.272	0	1
5.40967	3.09415	2.44123	41.5293	81.26	0	1
4.03125	0.640625	0.505443	27.4167	137.02	0	1
5.09516	2.26239	1.78499	56.1115	60.6574	0	1
4.33145	20.0314	15.8044	80.5543	4.42	0	1
4.42213	0.657787	0.518983	29.8443	147.05	0	1
4.77003	0.79845	0.629964	27.1395	131.503	0	1
4.03099	0.538028	0.424496	32.2366	171.495	0	1
4.15727	0.637982	0.503358	35.3323	203.253	0	1
4.78042	0.857143	0.676272	29.5423	124.59	0	1
4.1932	0.579592	0.457289	31.4803	177.247	0	1
4.8434	4.38491	3.45962	50.266	26.5287	0	1
4.12324	1.51232	1.1932	43.6215	75.6758	0	1
4.1181	0.891429	0.703323	74.2819	67.4829	0	1
4.57418	1.64779	1.30008	44.4043	80.2234	0	1
4.47019	4.13856	3.26526	49.6224	44.9443	0	1
5.42075	8.52736	6.72795	64.5283	21.091	0	1
5.49557	9.10148	7.18092	73.402	11.9388	0	1
4.42368	13.9032	10.9694	52.8786	4.472	0	1
4.23428	0.856918	0.676095	32.2138	138.664	0	1
4.7388	6.47092	5.10546	64.081	37.4741	0	1
4.47949	1.10769	0.873951	29.4615	104.365	0	1
4.29957	0.987069	0.778782	25.7134	127.228	0	1
5.10785	10.3717	8.18313	60.777	20.4	0	1
3.81663	1.58422	1.24993	23.8657	225.624	0	1
5.62173	14.813	11.6872	64.8955	10.88	0	1
5.31845	5.82403	4.59507	53.0721	31.62	0	1
4.8107	1.5823	1.24841	31.1152	102	0	1
4.20441	1.53824	1.21364	26.3	122.269	0	1
5.00823	8.73148	6.889	54.287	32.5158	0	1
4.16809	1.26211	0.995783	30.6296	113.511	0	1
5.49827	9.17225	7.23676	49.8983	39.252	0	1
4.44297	0.785146	0.619468	25.3979	135.169	0	1
4.48983	16.0787	12.6858	50.2485	1.02	0	1
4.35178	0.924901	0.729732	32.4822	134.642	0	1
4.23641	0.622283	0.490971	31.0408	187.476	0	1
4.10165	0.644231	0.508288	37.5151	77.9283	0	1
4.19492	1.07062	0.844703	30.8192	185.311	0	1
4.77337	8.82011	6.95892	64.6058	9.4713	0	1
4.38879	2.54291	2.00631	40.5674	90.6953	0	1
5	6.36913	5.02514	61.8087	28.7074	0	1
3.95259	0.711111	0.561055	31.4089	152.854	0	1
4.86799	1.85809	1.466	28.3465	136.943	0	1
3.99663	0.772727	0.609669	32.8502	209.145	0	1
4.77492	8.56647	6.7588	60.2356	9.5986	0	1
4.7235	2.15899	1.70341	48.4873	61.1821	0	1
4.30583	1.57752	1.24464	46.256	73.9732	0	1
4.75	1.69458	1.33699	40.3785	76.9002	0	1
4.54937	1.18101	0.9318	81.5165	53.8672	0	1
4.54545	1.43771	1.13433	45.6644	65.9863	0	1
5.20321	5.5415	4.37215	42.4997	77.7352	0	1
5.09717	2.33738	1.84416	35.807	90.5307	0	1
4.54699	1.74699	1.37835	79.2855	44.88	0	1
6.92543	1.08604	0.85687	43.3939	71.8977	0	1
5.1295	11.8734	9.36794	55.6319	20.1319	0	1
5.20314	2.42198	1.9109	48.5688	50.1509	0	1
5.18151	14.5885	11.5101	63.628	8.5	0	1
4.82169	1.52206	1.20088	33.2096	90.8386	0	1
4.36387	0.86911	0.685714	25.7945	231.466	0	1
5.26882	0.908602	0.716873	28.4866	107.329	0	1
4.00193	0.602317	0.475218	30.7857	156.255	0	1
4.17711	1.23706	0.976018	26.1907	171.334	0	1
4.29985	0.737991	0.582263	29.722	214.016	0	1
4.81481	0.711934	0.561705	32.6296	163.696	0	1
4.26593	3.2133	2.53524	33.1994	64.3499	0	1
5.17846	5.22186	4.11997	54.746	18.02	0	1
4.00752	0.498747	0.393503	27.2231	183.102	0	1
4.90374	4.09225	3.22872	53.8075	34.7416	0	1
3.45178	0.703046	0.554692	23.9289	190.655	0	1
4.83254	4.19395	3.30896	63.4456	34.7333	0	1
4.4757	2.10309	1.65931	34.9617	90.0461	0	1
5.03423	5.23755	4.13234	52.4969	43.0607	0	1
4.73805	3.83717	3.02746	69.1381	33.9762	0	1
5.66944	17.9986	14.2006	68.9306	15.1786	0	1
5.29506	1.70494	1.34517	35.9426	88.2691	0	1
4.1671	1.06266	0.838424	25.6292	176.038	0	1
4.82238	10.4939	8.27953	51.3431	15.98	0	1
4.31704	10.0014	7.89094	57.6774	42.357	0	1
4.41651	0.81382	0.642091	28.9712	149.01	0	1
3.94702	0.845475	0.667066	21.6578	141.159	0	1
3.99417	0.578641	0.456538	27.6272	149.007	0	1
4.6792	0.601504	0.474577	30.1654	92.3005	0	1
4.56933	2.78354	2.19617	86.779	25.1623	0	1
5.22877	1.52192	1.20077	38.0466	100.014	0	1
5.1817	2.11082	1.66541	28.7474	111.756	0	1
4.32857	1.71818	1.35562	42.3247	73.0929	0	1
4.05009	0.883721	0.697242	30.3542	172.072	0	1
3.98995	0.766332	0.604623	24.5101	188.679	0	1
5.35117	3.35786	2.6493	37.4465	105.326	0	1
5.1819	12.1611	9.5949	69.3158	6.67994	0	1
4.3959	2.03279	1.60384	43.391	58.1489	0	1
4.35316	4.18401	3.30112	76.1561	22.3678	0	1
4.74295	0.937304	0.739518	42.7414	102.894	0	1
4.85915	3.68906	2.91061	58.8884	48.2764	0	1
4.20992	0.820611	0.647449	28.771	170.933	0	1
5.37682	13.5305	10.6753	58.6695	26.696	0	1
4.51366	2.97996	2.35114	67.1821	41.6191	0	1
4.74473	2.96226	2.33718	46.9623	66.3828	0	1
5.42694	16.4394	12.9704	66.828	15.3	0	1
4.58587	1.6662	1.31461	32.4127	94.52	0	1
5.84714	18.8753	14.8923	73.6721	5.44	0	1
6.87045	33.5927	26.5041	76.6267	6.87607	0	1
4.63612	0.979784	0.773034	29.5768	162.285	0	1
5.03003	0.975976	0.770029	27.0781	107.769	0	1
4.95082	0.827869	0.653175	32.1762	118.45	0	1
4.19331	0.843866	0.665797	29.5836	168.681	0	1
3.9127	0.769841	0.607392	25.0476	156.935	0	1
4.19967	0.628713	0.496044	34.3762	88.6846	0	1
4.67206	0.69515	0.548462	32.0162	89.7658	0	1
3.91479	0.656642	0.51808	24.2807	177.506	0	1
4.16667	1.20513	0.950827	24.7582	188.715	0	1
4.82012	1.60061	1.26286	46.8974	63.0184	0	1
5.08069	9.38713	7.40629	57.0788	27.9752	0	1
5.14107	12.3589	9.751	50.9652	33.6119	0	1
5.54186	13.3581	10.5394	58.3849	14.28	0	1
4.96147	2.12259	1.67469	32.8354	92.4031	0	1
5.96951	0.929878	0.733659	47.3872	73.2264	0	1
4.60584	1.04818	0.826993	38.908	94.7893	0	1
5.00276	3.08276	2.43225	37.0524	62.7095	0	1
5.21145	1.81659	1.43326	53.3271	67.0223	0	1
5.37758	11.9917	9.4613	53.5337	17.9815	0	1
6.57798	0.845183	0.666836	53.3727	84.9605	0	1
4.64252	8.77638	6.92442	65.0787	11.1839	0	1
4.47809	1.89641	1.49624	29.4223	123.082	0	1
4.68758	2.9421	2.32127	38.4511	81.2202	0	1
5.65011	12.3018	9.70589	70.751	20.106	0	1
3.9425	0.5975	0.471418	22.145	191.572	0	1
5.62703	15.3306	12.0956	63.1468	18.278	0	1
4.48048	1.6957	1.33788	42.1732	73.6224	0	1
4.95144	8.37795	6.61007	59.6417	41.3977	0	1
4.21553	3.03803	2.39696	58.6054	34.34	0	1
4.44277	0.802711	0.633326	30.7666	194.823	0	1
5.12	10.592	8.35692	47.1467	25.1692	0	1
4.4085	0.797386	0.629124	34.0163	106.298	0	1
4.19015	0.626486	0.494287	27.584	111.96	0	1
4.63848	0.653061	0.515255	27.1822	112.201	0	1
4.92556	2.78784	2.19956	36.4206	70.72	0	1
5.17314	5.29682	4.17911	41.9682	46.0258	0	1
4.33333	0.920398	0.726179	26.0821	109.373	0	1
4.43467	0.962312	0.759248	34.696	143.658	0	1
4.36647	2.20468	1.73946	24.6647	132.167	0	1
5.73515	28.0438	22.1261	63.5618	4.3007	0	1
4.23556	2.28889	1.8059	34.3222	104.292	0	1
4.92556	1.22581	0.967142	35.9007	111.604	0	1
3.71429	0.933333	0.736385	25.4825	198.989	0	1
4.69961	2.06492	1.62919	45.5785	66.6955	0	1
5.31981	13.3699	10.5487	56.2148	32.2731	0	1
4.2042	1.21756	0.960633	26.855	124.947	0	1
5.231	2.211	1.74444	50.051	59.16	0	1
5.10232	1.98909	1.56936	33.1487	91.46	0	1
4.80766	16.1177	12.7166	50.4086	23.12	0	1
4.66229	0.917448	0.723852	35.2664	172.835	0	1
5.02472	3.86404	3.04867	52.6494	47.0971	0	1
6.12754	7.26072	5.72859	60.5519	53.678	0	1
5.33373	3.07986	2.42996	55.1311	43.0029	0	1
4.25508	0.548533	0.432784	31.0542	176.555	0	1
4.19712	1.51495	1.19527	28.6855	75.4785	0	1
4.87979	3.10532	2.45005	36.0585	54.778	0	1
4.95563	6.36646	5.02303	49.0674	60.2146	0	1
4.60453	2.44828	1.93165	41.0334	78.5893	0	1
5	4.07176	3.21255	56.3123	57.4469	0	1
5.17137	29.094	22.9547	64.6332	5.49287	0	1
4.19028	1.44939	1.14355	23.5992	162.186	0	1
4.6321	2.15239	1.6982	69.1298	36.6649	0	1
4.33478	0.995652	0.785554	26.0522	123.446	0	1
4.16349	2.49137	1.96565	38.5395	69.8863	0	1
3.9305	2.28185	1.80035	32.3565	214.372	0	1
3.83772	1.58333	1.24922	26.2917	152.497	0	1
5.04568	2.62974	2.07482	39.3265	161.032	0	1
4.9039	1.11111	0.876649	38.5961	146.36	0	1
4.98712	7.3285	5.78207	61.504	22.44	0	1
5.38786	16.368	12.9141	66.0198	11.9049	0	1
3.91284	0.727064	0.573642	29.6835	124.439	0	1
4.20139	6.69792	5.28455	85.3715	22.9418	0	1
4.5	7.57991	5.98043	80.1164	26.3582	0	1
5.63793	9.61303	7.58452	53.7356	51.412	0	1
4.50907	2.38662	1.88301	33.7596	227.559	0	1
5.20391	4.51648	3.56343	40.5104	60.6431	0	1
5.47896	2.9698	2.34312	32.9569	88.0134	0	1
3.88608	0.571429	0.450848	28.6727	155.522	0	1
4.64805	1.21688	0.960101	29.6948	109.448	0	1
4.7806	1.46968	1.15955	34.312	68.6775	0	1
5.02041	17.2174	13.5842	55.3345	33.008	0	1
4.51103	1.41176	1.11386	43.1581	143.231	0	1
5.05808	9.34952	7.37663	53.887	33.5895	0	1
5.29241	3.3125	2.61351	37.7165	98.6914	0	1
4.75624	3.05945	2.41386	45.4245	85.2322	0	1
4.1365	0.905045	0.714066	29.1009	199.402	0	1
4.75562	6.01685	4.7472	47.1657	51.2668	0	1
5.11059	14.4386	11.3918	57.1443	35.4808	0	1
4.45299	3.18071	2.50953	84.6313	2.38	0	1
4.04417	1.76104	1.38943	27.436	126.455	0	1
5.94204	10.8261	8.54165	103.055	4.76	0	1
4.88673	4.83819	3.81725	74.5049	33.8313	0	1
4.63921	0.99768	0.787153	30.9965	94.3517	0	1
5.16247	31.1342	24.5644	52.1478	36.04	0	1
4.61528	1.74399	1.37598	28.6407	116.822	0	1
5.10482	2.61006	2.0593	34.4874	93.2648	0	1
5.37565	1.12799	0.889967	32.6993	83.7567	0	1
5.41532	2.76699	2.18311	37.7282	71.4655	0	1
4.15562	0.472622	0.372892	26.83	195.718	0	1
4.49327	2.50336	1.97511	39.093	74.5911	0	1
4.45573	2.26693	1.78857	34.6784	61.9304	0	1
3.7441	0.898367	0.708797	26.1361	153.211	0	1
5.48444	25.636	20.2264	58.0027	10.5564	0	1
5.67667	5.56467	4.39043	60.9988	44.8594	0	1
4.73978	1.43011	1.12833	40.3892	96.9954	0	1
6.79865	23.5748	18.6001	65.4567	20.4283	0	1
4.70916	2.26733	1.78888	34.7438	101.252	0	1
5.53629	25.6371	20.2272	53.1224	19.9994	0	1
4.51416	1.82153	1.43716	29.5992	122.786	0	1
4.97051	3.99631	3.15303	50.3226	50.9637	0	1
4.34384	1.0137	0.799792	28.7411	137.17	0	1
3.9576	0.985866	0.777832	64.1437	69.1614	0	1
4.58157	8.72169	6.88127	72.5221	20.06	0	1
4.72727	5.06095	3.99301	45.1725	133.367	0	1
4.16584	0.967822	0.763596	30.6906	127.284	0	1
4.47534	1.23916	0.97768	28.5142	124.876	0	1
5.38174	1.41079	1.11309	51.7994	57.1847	0	1
4.9697	1.47515	1.16387	36.6133	76.0415	0	1
4.12203	0.6	0.47339	33.9966	84.7153	0	1
4.60724	2.27855	1.79774	33.4694	125.224	0	1
4.59784	2.87556	2.26877	40.2606	64.8402	0	1
5.16254	2.89046	2.28053	38.2491	109.142	0	1
5.34355	6.1788	4.87497	53.3716	55.9628	0	1
5.9191	1.35393	1.06823	36.018	96.7758	0	1
5.45233	32.7004	25.8001	59.6284	25.1967	0	1
6.3043	9.41855	7.43109	61.5735	9.33608	0	1
5.69742	1.39483	1.1005	47.3561	56.2595	0	1
4.00744	2.66605	2.10347	35.2512	202.658	0	1
6.29315	5.63501	4.44593	69.5202	5.86931	0	1
6.03649	5.02465	3.96437	66.7387	5.44	0	1
4.54087	2.88018	2.27242	38.7122	98.3447	0	1
5.66049	5.23868	4.13324	45.5432	85.5592	0	1
6.60458	2.0333	1.60424	44.9625	97.8468	0	1
6.74112	6.26331	4.94165	81.8994	9.18	0	1
5.694	6.37576	5.03038	79.7136	7.26837	0	1
6.88569	7.38614	5.82754	78.7381	9.20515	0	1
3.8614	2.4846	1.96031	37.5667	163.608	0	1
5.8022	6.21821	4.90607	68.9513	11.8269	0	1
4.81896	1.65978	1.30954	43.3414	90.3255	0	1
4.83297	1.06593	0.841005	50.5582	82.6815	0	1
5.5403	3.53575	2.78965	70.7753	44.4087	0	1
5.30793	4.27947	3.37643	74.5193	21.2139	0	1
4.29662	3.506	2.76618	62.2356	50.1197	0	1
4.37987	4.02381	3.17472	70.7468	27.674	0	1
4.54147	2.93839	2.31834	65.1232	33.66	0	1
6.41038	7.09906	5.60104	103.648	8.17415	0	1
6.34421	8.72216	6.88164	73.1395	14.425	0	1
4.00625	1.86875	1.47441	53.5859	58.3464	0	1
5.24664	2.9716	2.34454	70.426	24.8223	0	1
4.89978	2.87004	2.26442	63.62	57.737	0	1
6.84176	3.66926	2.89499	63.07	56.4328	0	1
4.89123	2.64561	2.08735	58.2596	31.0072	0	1
7.63116	2.76789	2.18382	61.6884	40.5841	0	1
4.27455	2.20909	1.74294	61.8982	38.42	0	1
29.4692	1.64462	1.15687	90.7215	147.747	1	2
37.9222	2.4712	1.73831	60.3614	93.912	1	2
22.3389	6.29431	4.42759	89.6605	56.1093	1	2
30.4107	1.7504	1.23128	47.4386	177.167	1	2
58.4316	2.00526	1.41056	68.7863	139.326	1	2
19.4043	6.85449	4.82163	79.2805	75.1731	1	2
49.204	3.2729	2.30224	85.8999	73.4817	1	2
33.8826	3.61337	2.54174	87.6079	64.1231	1	2
39.9508	7.21038	5.07198	90.4548	61.1026	1	2
40.6858	4.71358	3.31566	114.285	50.8831	1	2
68.3187	1.70984	1.20275	35.7863	190.662	1	2
77.5318	1.66879	1.17387	53.4045	147.573	1	2
66.6689	3.69434	2.59869	70.5137	70.288	1	2
39.1976	5.75166	4.04587	85.7274	55.8398	1	2
41.5597	5.02623	3.53558	82.9326	55.5617	1	2
41.099	10.6269	7.47523	94.4836	48.6663	1	2
75.3163	8.25737	5.80845	76.9978	52.3876	1	2
45.4225	4.20339	2.95678	87.0775	40.851	1	2
29.8836	7.98386	5.61606	85.7468	43.6102	1	2
64.2174	4.38208	3.08247	71.0962	81.297	1	2
45.5971	7.9955	5.62425	79.6736	61.148	1	2
13.0667	1.13333	0.797217	56.5333	139.76	1	2
70.5202	4.15029	2.91942	56.2081	81.3801	1	2
14.6118	4.46734	3.14244	72.4573	75.9297	1	2
57.2632	4.81215	3.38499	87.6603	64.1457	1	2
9.6485	3.28883	2.31345	104.067	58.8082	1	2
63.0719	16.0211	11.2697	83.3829	30.0164	1	2
8.93765	1.32824	0.934316	49.4	146.164	1	2
43.1305	6.14314	4.32124	75.9805	68.6303	1	2
35.4299	8.81049	6.19753	98.0407	53.3182	1	2
42.7572	11.1037	7.81067	77.2545	37.9979	1	2
71.0306	21.4753	15.1063	89.8102	23.4699	1	2
20.069	1.56419	1.10029	37.8846	189.041	1	2
9.39724	1.32975	0.935385	42.1043	180.19	1	2
60.6284	3.41895	2.40498	52.4716	92.358	1	2
52.331	9.05434	6.36906	68.0515	62.9918	1	2
19.9379	5.79296	4.07492	68.6708	50.924	1	2
9.23541	20.1308	14.1605	93.9567	32.0485	1	2
26.5994	23.3141	16.3998	78.7367	31.1652	1	2
50.525	4.14377	2.91484	56.8371	95.9481	1	2
41.8414	2.75787	1.93996	62.7639	94.7643	1	2
43.7828	2.26138	1.59071	62.7893	80.5879	1	2
29.2302	2.26151	1.5908	109.45	67.0585	1	2
39.5824	20.0656	14.1147	93.2789	41.8145	1	2
43.1747	14.8395	10.4385	73.3704	38.18	1	2
51.7232	15.186	10.6822	83.532	29.0615	1	2
13.0159	6.1264	4.30948	78.3071	71.8141	1	2
31.5376	8.87957	6.24612	65.1258	71.3231	1	2
35.7759	14.9235	10.4976	94.2277	56.3016	1	2
36.657	20.214	14.2191	72.1948	41.6441	1	2
16.022	28.7976	20.257	100.025	31.0593	1	2
53.465	33.5447	23.5962	74.9829	28.4668	1	2
76.8515	23.6498	16.6359	79.373	15.9365	1	2
51.8335	4.2568	2.99435	62.2905	73.6169	1	2
61.2359	21.4499	15.0884	70.3625	35.5946	1	2
10.399	4.52941	3.18611	70.1509	77.949	1	2
12.3169	5.21092	3.6655	75.3972	69.8723	1	2
11.9361	7.4895	5.26831	73.7936	55.624	1	2
31.3068	17.7103	12.4579	67.1881	42.84	1	2
59.1694	21.0011	14.7727	76.0597	23.4625	1	2
46.4781	36.7539	25.8537	74.9247	17	1	2
51.9157	1.74217	1.22549	47.6867	101.023	1	2
33.264	4.76012	3.34839	65.6407	85.017	1	2
55.2334	12.694	8.92926	60.1523	66.6825	1	2
40.0171	14.9829	10.5394	58.0902	50.8786	1	2
35.6667	26.0493	18.3237	75.971	30.4902	1	2
14.657	37.7952	26.5861	94.7818	19.38	1	2
55.8132	5.54447	3.90012	52.498	112.887	1	2
31.4415	1.19578	0.841141	72.5902	98.6879	1	2
31.3117	17.4131	12.2489	77.1052	52.0022	1	2
8.98409	21.2609	14.9555	63.0053	41.0767	1	2
52.6444	16.3469	11.4989	72.2457	41.2564	1	2
48.565	13.744	9.66789	63.154	36.5085	1	2
17.7997	29.525	20.7687	92.1737	17.2732	1	2
54.5714	2.46774	1.73588	46.4551	110.12	1	2
14.0612	1.46599	1.03121	44.1395	100.755	1	2
37.6848	3.49287	2.45697	56.9507	93.7229	1	2
27.7464	3.12051	2.19505	86.1263	73.0929	1	2
17.6863	6.70946	4.71961	76.168	66.8617	1	2
28.2644	11.9345	8.39503	76.3195	52.757	1	2
32.6617	43.6173	30.6816	81.3474	29.0118	1	2
10.005	35.6971	25.1103	84.5502	14.6042	1	2
46.3598	5.58644	3.92965	58.2514	78.3927	1	2
10.4813	3.37776	2.37601	59.6587	85.6834	1	2
24.2475	3.09607	2.17786	73.3464	69.9682	1	2
24.3577	4.26208	2.99806	96.7636	37.815	1	2
59.8351	15.7982	11.1129	87.8335	34.1527	1	2
38.2015	30.7829	21.6535	71.4112	30.1969	1	2
8.00907	7.98413	5.61625	61.246	78.7054	1	2
39.1652	12.08	8.49742	59.6084	61.148	1	2
35.9299	11.8467	8.33327	63.1765	45.2826	1	2
34.3046	55.2282	38.849	76.9325	21.8025	1	2
31.5113	1.894	1.33229	69.1285	100.287	1	2
48.6271	3.16353	2.22531	45.1247	101.977	1	2
32.3858	11.4782	8.07408	67.255	60.9008	1	2
43.9828	16.5389	11.6339	69.5471	55.1848	1	2
29.4647	14.2225	10.0045	62.8304	56.7922	1	2
39.3581	9.83557	6.9186	64.2704	57.1817	1	2
48.7912	24.517	17.2459	77.9246	45.546	1	2
47.7071	16.2705	11.4451	62.6837	33.7218	1	2
36.6732	31.5231	22.1742	73.481	30.9419	1	2
56.3211	2.40444	1.69135	46.9322	112.386	1	2
44.2288	3.21108	2.25876	48.0236	92.4162	1	2
24.4803	2.15278	1.51432	81.419	86.951	1	2
29.7604	8.03516	5.65215	62.1253	73.7236	1	2
30.1045	7.0784	4.97914	55.641	71.6916	1	2
73.6382	10.176	7.15807	57.056	75.18	1	2
38.2988	7.83972	5.51467	52.1159	72.4591	1	2
35.0286	19.7094	13.8641	76.0138	55.4242	1	2
37.4183	22.7821	16.0255	57.4223	46.5055	1	2
23.5786	26.5704	18.6903	75.649	47.7455	1	2
26.6819	1.22303	0.860315	58.9561	94.6233	1	2
31.7477	2.59309	1.82405	70.003	80.3437	1	2
37.9211	25.5774	17.9918	93.1459	32.7549	1	2
13.7007	5.81882	4.09311	102.428	43.6102	1	2
4.33756	1.16751	0.821259	46.2944	224.23	0	2
4.1286	1.39468	0.981054	55.9091	225.601	0	2
3.95057	1.24588	0.876386	62.6521	213.718	0	2
3.90102	1.76109	1.2388	42.442	220.414	0	2
3.90039	0.820446	0.577123	70.6291	216.344	0	2
3.73901	0.846871	0.595711	56.4727	217.063	0	2
3.76273	1.15358	0.811459	61.9802	210.95	0	2
3.56876	1.32767	0.933921	44.7742	225.327	0	2
4.37113	1.15979	0.81583	72.3969	209.045	0	2
4.40522	2.76923	1.94795	62.7775	205.484	0	2
4.03248	1.44664	1.0176	46.0174	223.249	0	2
3.79056	1.36594	0.960837	70.725	204.629	0	2
4.1144	1.1656	0.819914	51.1952	221.294	0	2
4.20917	3.17156	2.23096	52.8837	203.264	0	2
4.08696	1.43478	1.00926	54.5277	204.158	0	2
4.44134	1.77527	1.24877	49.0009	216.626	0	2
4.03395	1.40741	0.990008	51.5617	210.737	0	2
4.36538	1.79038	1.2594	51.4885	207.033	0	2
3.99544	1.21277	0.853092	46.0729	215.295	0	2
3.84088	1.41812	0.997542	58.7735	199.692	0	2
3.71376	1.28133	0.901319	52.887	201.173	0	2
4.3691	1.8809	1.32307	49.6863	193.389	0	2
4.16166	1.99142	1.40082	56.1874	208.704	0	2
3.97588	0.936404	0.658691	53.0746	195.174	0	2
3.93319	1.48491	1.04453	82.9203	193.858	0	2
4.17286	1.98286	1.39479	53.1871	204.516	0	2
4.54315	1.60932	1.13204	56.3619	192.108	0	2
3.66469	0.820513	0.57717	61.6529	200.955	0	2
4.27241	2.56132	1.8017	50.1132	192.778	0	2
3.94764	1.60733	1.13064	63.466	192.716	0	2
4.35506	1.8	1.26617	46.5618	202.757	0	2
4.10985	2.7822	1.95707	58.6383	186.047	0	2
3.8309	1.58455	1.11462	62.1253	194.01	0	2
4.04519	1.64431	1.15665	51.8265	203.194	0	2
3.43814	0.516495	0.363316	78.767	186.649	0	2
4.50971	2.03771	1.43338	51.9977	199.297	0	2
4.52894	1.47305	1.03619	56.2056	196.863	0	2
3.8563	1.21037	0.851407	43.5733	200.103	0	2
4.29564	1.98548	1.39664	53.9834	188.512	0	2
4.27098	2.60664	1.83358	57.9843	188.418	0	2
4.04147	0.815668	0.573763	55.2949	181.567	0	2
4.39021	1.5021	1.05662	59.1469	196.784	0	2
3.76636	1.54984	1.0902	52.3879	184.963	0	2
4.40138	2.10957	1.48393	59.8235	177.539	0	2
4.12531	1.28133	0.901319	48.5086	181.62	0	2
4.15675	1.48041	1.04136	63.1553	179.901	0	2
3.6036	0.837838	0.589357	68.0563	189.314	0	2
4.18652	1.67268	1.17661	46.5451	176.816	0	2
3.87228	1.55588	1.09445	60.1713	174.907	0	2
4.26462	1.53482	1.07963	49.8988	184.788	0	2
3.94561	1.05789	0.744151	66.3667	169.517	0	2
4.33532	2.4352	1.71298	65.3757	168.015	0	2
4.68552	2.47059	1.73788	58.6923	165.937	0	2
4.35196	2.30307	1.62004	49.2388	164.762	0	2
4.71737	3.35755	2.36179	59.0772	166.044	0	2
4.33662	2.06412	1.45196	58.8607	171.153	0	2
4.15658	1.10526	0.777471	51.6579	171.983	0	2
3.85057	1.3908	0.978329	62.2315	162.58	0	2
4.32082	1.76621	1.2424	57.7611	165.172	0	2
4.44928	2.4686	1.73648	56.9758	166.71	0	2
4.55529	1.68039	1.18203	74.9411	171.194	0	2
4.09712	3.12747	2.19994	49.2291	157.728	0	2
4.25526	1.2886	0.906433	53.6675	161.24	0	2
4.67245	1.83333	1.28962	70.0243	163.671	0	2
4.12764	1.09079	0.767288	54.387	171.948	0	2
4.46	3.11556	2.19156	65.6489	150.823	0	2
4.15336	1.7856	1.25604	53.2739	163.665	0	2
4.09154	1.43337	1.00827	55.4594	162.505	0	2
4.29459	1.37973	0.970538	59.35	167.341	0	2
4.98855	2.75	1.93442	72.0878	153.206	0	2
4.02269	1.01362	0.713004	64.5734	154.266	0	2
5.31737	2.45768	1.7288	59.1214	146.004	0	2
3.82883	1.18919	0.836507	68.6351	149.299	0	2
3.75671	1.20805	0.849777	61.3674	161.752	0	2
4.31512	2.53748	1.78493	79.5527	147.607	0	2
4.32895	1.57829	1.11021	56.6678	146.123	0	2
4.08324	1.48649	1.04563	66.8854	150.15	0	2
4.68919	2.16757	1.52472	78.3432	138.38	0	2
4.8676	2.60627	1.83332	74.7979	146.928	0	2
4.32396	1.46569	1.03101	63.3127	158.355	0	2
4.33219	1.39669	0.982468	57.7643	155.631	0	2
4.88235	1.41001	0.991838	61.9991	152.905	0	2
4.06764	1.13163	0.796016	67.1828	140.014	0	2
4.03598	1.52083	1.06979	57.625	151.969	0	2
4.37575	1.06561	0.749576	65.5825	144.832	0	2
4.50873	1.14785	0.807426	85.2957	149.377	0	2
4.9011	1.63004	1.14661	69.8315	136.935	0	2
3.95455	1.51818	1.06793	71.7691	145.274	0	2
5.17532	2.47403	1.7403	80.5156	139.572	0	2
4.3617	1.66755	1.173	68.5904	136.605	0	2
4.96861	1.20852	0.850105	93.1278	134.493	0	2
4.46507	1.38235	0.972384	67.6765	141.866	0	2
5.20077	3.28764	2.31262	88.9807	120.953	0	2
4.91567	1.94444	1.36777	81.5357	138.156	0	2
3.88107	1.61809	1.13821	92.3869	131.453	0	2
4.77058	2.70985	1.90618	82.4507	135.292	0	2
4.48873	2.81597	1.98083	64.301	122.163	0	2
4.29598	2.17661	1.53109	73.2558	136.301	0	2
4.30732	1.0878	0.765191	102.832	124.932	0	2
4.9969	2.06656	1.45368	78.3777	131.434	0	2
5.14152	1.87305	1.31755	67.6842	127.525	0	2
4.49924	2.22914	1.56803	73.3854	130.607	0	2
4.54167	1.68056	1.18215	79.6094	131.69	0	2
4.27162	1.78756	1.25741	96.7967	118.379	0	2
5.38296	2.75405	1.93727	90.4326	121.757	0	2
4.24344	1.58309	1.11359	74.2026	125.751	0	2
4.65152	2.16212	1.52089	77.7788	110.011	0	2
4.17514	2.87571	2.02285	93.6031	107.083	0	2
4.67473	2.13027	1.49849	61.4969	120.533	0	2
4.63489	1.28602	0.904618	63.6963	125.43	0	2
3.98805	1.79548	1.26299	81.8154	107.651	0	2
4.31602	2.39719	1.68624	89.9491	110.207	0	2
4.74966	1.49243	1.04982	85.1114	121.132	0	2
4.82044	2.96496	2.08563	92.8292	108.695	0	2
4.78255	2.30729	1.62301	77.3685	113.089	0	2
4.55621	3.34895	2.35574	87.5679	105.77	0	2
4.21047	2.59517	1.82551	89	103.031	0	2
5.1802	3.47151	2.44195	84.4188	107.613	0	2
5.6925	2.75476	1.93777	103.332	113.306	0	2
4.86498	2.63666	1.8547	84.4808	114.709	0	2
4.34716	3.13755	2.20704	91.1201	104.506	0	2
4.40283	1.42933	1.00543	77.8127	108.62	0	2
4.72581	2.43548	1.71318	78.6371	112.942	0	2
4.62988	4.01077	2.82128	70.2288	97.4004	0	2
4.68421	3.29112	2.31506	86.1332	99.8292	0	2
4.61564	2.32356	1.63445	90.5733	110.338	0	2
4.87822	3.59602	2.52953	92.0363	97.2721	0	2
4.43806	2.1328	1.50027	88.0377	107.686	0	2
5.84444	2.25965	1.5895	85.7088	105.522	0	2
3.66392	2.54595	1.79089	92.4979	92.1049	0	2
5.75713	3.61345	2.5418	107.7	100.886	0	2
4.71332	2.00543	1.41068	109.36	105.736	0	2
4.67844	2.74421	1.93035	101.019	93.6803	0	2
4.62969	3.1125	2.18942	81.15	105.867	0	2
5.15023	1.79666	1.26382	82.0061	101.985	0	2
4.72318	2.97351	2.09165	75.902	88.351	0	2
4.39117	3.06467	2.15577	113.227	96.3827	0	2
4.61026	6.3859	4.49201	103.578	82.1338	0	2
5.51067	6.37931	4.48738	114.571	89.9093	0	2
4.95443	4.55599	3.2048	105.895	84.2027	0	2
4.68114	2.37257	1.66893	90.9714	92.1456	0	2
4.94487	7.31547	5.14589	96.8499	82.4379	0	2
4.7619	3.96654	2.79017	87.601	95.5835	0	2
6.23393	7.78278	5.47461	111.099	84.0983	0	2
5.46218	3.91088	2.75102	96.5347	83.5688	0	2
4.84786	4.50069	3.16591	122.026	76.1372	0	2
3.66484	3.52026	2.47625	90.1577	70.5408	0	2
6.21798	4.8515	3.41267	83.4387	83.9738	0	2
4.56214	2.01721	1.41896	98.5679	83.0192	0	2
5.10218	6.01064	4.22805	97.5641	73.8199	0	2
4.36875	1.54375	1.08591	75.1175	81.544	0	2
4.6519	5.13924	3.61508	105.481	74.684	0	2
4.62172	3.55805	2.50283	92.4082	79.3738	0	2
5.51392	5.32548	3.74609	82.1435	76.1509	0	2
4.90336	8.17987	5.75393	81.8309	67.435	0	2
6.55533	1.18579	0.834114	148.001	75.5565	0	2
4.34995	6.47106	4.55192	107.728	58.4256	0	2
5.58354	4.57627	3.21907	121.961	66.4628	0	2
5.98106	2.58712	1.81985	100.496	74.9143	0	2
3.72314	4.31921	3.03825	92.3657	70.6521	0	2
4.95406	3.88782	2.7348	97.4006	66.2128	0	2
5.4544	11.5334	8.11289	107.631	58.4662	0	2
5.52019	3.71021	2.60986	118.723	63.499	0	2
4.39385	8.32308	5.85467	91.9569	55.6822	0	2
4.21472	1.72497	1.21339	52.0844	231.948	0	2
4.59072	2.59916	1.82832	57.6582	228.61	0	2
4.37559	2.06754	1.45436	48.2891	212.372	0	2
4.00142	1.48148	1.04211	36.2963	229.626	0	2
4.45868	2.27961	1.60354	45.062	214.484	0	2
3.86512	2.39535	1.68495	56.2674	215.787	0	2
4.50509	1.99185	1.40112	46.9552	206.282	0	2
3.77429	1.16442	0.819087	43.2691	216.134	0	2
4.14939	1.28802	0.906029	53.393	211.441	0	2
4.44987	1.92105	1.35132	46.1917	217.95	0	2
4.99599	2.19639	1.545	59.1122	213.689	0	2
3.9425	1.06732	0.750782	39.1024	217.763	0	2
3.80117	0.764133	0.537511	54.2632	210.716	0	2
4.51765	1.91634	1.348	49.6536	209.518	0	2
3.98385	0.814978	0.573277	56.9192	203.875	0	2
4.15137	1.35578	0.953692	50.5369	210.461	0	2
3.79256	1.11612	0.78511	62.2232	193.694	0	2
4.34045	1.52261	1.07105	45.4447	208.617	0	2
3.99029	1.37864	0.969772	48.9515	209.323	0	2
3.86957	0.827759	0.582268	53.2174	199.47	0	2
4.26398	1.73602	1.22116	51.0039	197.507	0	2
4.23568	2.14537	1.50911	46.1035	205.546	0	2
3.80994	1.00292	0.705483	50.4327	184.432	0	2
4.00109	1.55301	1.09243	55.7071	184.18	0	2
4.19597	1.69317	1.19102	54.598	197.478	0	2
3.81965	1.71642	1.20737	46.2861	187.958	0	2
4.7571	2.1733	1.52875	62.5426	183.096	0	2
3.77086	0.789539	0.555383	79.279	173.396	0	2
4.34305	1.13642	0.799391	47.3205	188.822	0	2
3.81527	1.52977	1.07608	48.8015	182.103	0	2
4.17298	0.830313	0.584064	70.5157	178.866	0	2
4.72648	1.51916	1.06862	59.3502	184.961	0	2
4.48443	2.52249	1.77439	61.7439	181.113	0	2
4.26829	1.24293	0.874308	64.921	168.507	0	2
4.04425	1.00737	0.708614	55.5457	163.581	0	2
3.97292	0.882012	0.62043	64.2108	178.197	0	2
3.90087	0.895652	0.630025	55.5391	176.838	0	2
4.23767	1.66368	1.17027	48.528	168.965	0	2
3.87853	1.31818	0.927244	46.0094	177.384	0	2
4.51433	1.5496	1.09003	57.7605	176.47	0	2
4.21038	1.64754	1.15892	55.444	165.761	0	2
4.26008	1.58065	1.11187	61.6149	158.208	0	2
4.07701	1.44143	1.01394	70.2831	154.59	0	2
4.22763	1.64805	1.15928	48.2198	155.643	0	2
4.06258	1.04631	0.736001	65.3354	154.893	0	2
4.56884	1.23271	0.86712	50.382	161.428	0	2
4.41998	1.71964	1.20964	63.9637	162.235	0	2
4.4446	1.95971	1.37851	55.4388	159.176	0	2
4.20107	1.63636	1.15106	67.0128	148.777	0	2
4.85472	1.42358	1.00139	59.3443	158.468	0	2
3.88889	1.39413	0.980668	79.8155	142.891	0	2
4.51211	2.47405	1.74031	62.9879	139.583	0	2
4.01223	1.18654	0.834647	57.9694	141.533	0	2
4.98418	2.68856	1.89121	67.0134	136.218	0	2
4.58987	3.12786	2.20022	66.6622	133.631	0	2
4.70344	1.37854	0.969703	67.249	151.819	0	2
4.9031	2.05039	1.4423	67.7907	147.757	0	2
4.86489	1.42477	1.00222	63.9376	146.24	0	2
4.25974	1.34416	0.945515	63.8506	133.504	0	2
4.47357	2.69319	1.89446	61.0409	128.415	0	2
4.47497	1.64249	1.15537	71.1593	144.971	0	2
4.03509	1.24211	0.87373	77.6018	127.954	0	2
3.97766	2.00508	1.41042	66.6234	125.817	0	2
4.40975	1.68906	1.18813	69.9921	130.101	0	2
4.29438	1.75193	1.23235	84.6031	121.799	0	2
4.52508	1.65775	1.1661	59.2419	135.94	0	2
5.04113	2.41902	1.70161	85.135	122.77	0	2
4.15166	1.49921	1.05458	71.5814	116.12	0	2
4.36923	1.72198	1.21129	78.5319	117.884	0	2
4.74901	3.92734	2.7626	84.996	113.961	0	2
4.48211	1.42247	1.0006	59.6918	129.383	0	2
4.0947	1.94501	1.36817	74.1853	125.674	0	2
4.5852	1.66928	1.17422	75.1065	128.508	0	2
4.59344	3.24918	2.28556	74.1213	115.968	0	2
4.81069	3.07795	2.16511	84.2249	118.882	0	2
4.7062	3.7617	2.64608	69.7459	108.8	0	2
4.37879	1.35781	0.955119	69.0396	119.012	0	2
4.83902	1.30244	0.91617	74.2813	119.535	0	2
4.46045	2.33412	1.64188	84.2739	113.717	0	2
4.66704	2.03725	1.43305	85.0192	116.887	0	2
4.19795	4.14956	2.91891	72.3065	101.209	0	2
4.5987	1.74421	1.22692	75.5829	115.537	0	2
4.17873	3.13268	2.20361	65.6261	94.55	0	2
4.60618	2.34775	1.65147	87.5837	98.8114	0	2
4.73159	2.3524	1.65474	69.9227	96.1208	0	2
5.17163	3.00834	2.11615	89.9464	98.7201	0	2
4.3087	1.30964	0.921232	68.9196	99.4411	0	2
4.74756	4.73127	3.3281	79.443	86.0307	0	2
5.16927	2.77791	1.95406	82.2305	100.751	0	2
5.15201	4.63648	3.26142	80.7109	82.4148	0	2
4.01114	2.42655	1.7069	64.3739	83.2667	0	2
5.65779	2.80482	1.97298	100.48	92.1519	0	2
4.34958	3.04131	2.13934	86.6398	89.0858	0	2
4.369	3.84686	2.70599	91.5904	85.449	0	2
4.8034	1.13107	0.795623	128.608	91.4069	0	2
4.34777	4.12871	2.90425	68.3936	72.706	0	2
5.36957	3.90097	2.74404	86.3575	78.7773	0	2
4.15447	2.64967	1.86385	81.7288	72.7767	0	2
4.20335	3.18239	2.23858	115.247	70.9941	0	2
4.94231	1.54121	1.08413	118.101	86.4269	0	2
5.11793	3.70101	2.60339	86.0572	71.8205	0	2
4.84926	3.17957	2.2366	91.7364	73.0502	0	2
5.15927	4.22324	2.97074	98.6958	82.8401	0	2
4.02405	6.41082	4.50954	87.5922	63.2309	0	2
3.28756	2.80452	1.97278	83.7302	62.2534	0	2
5.02235	10.9162	7.67875	98.5978	65.4789	0	2
5.50534	9.53205	6.7051	110.905	66.6929	0	2
3.53995	2.7845	1.95869	115.734	59.6203	0	2
4.87275	4.64454	3.26709	95.731	61.9033	0	2
4.50825	8.51651	5.99074	75.5767	61.0733	0	2
5.2913	10.4968	7.38376	97.966	61.3735	0	2
4.32949	4.76771	3.35373	102.236	63.7217	0	2
5.01441	7.60984	5.35297	94.3914	54.4053	0	2
4.3289	8.81063	6.19763	75.5216	50.5778	0	2
4.99858	14.9218	10.4964	85.899	51.8408	0	2
4.45245	3.96398	2.78837	93.6657	58.6636	0	2
3.19404	4.90433	3.44984	80.4711	49.1591	0	2
3.90667	5.67378	3.99109	85.5689	46.7732	0	2
4.28684	4.8189	3.38974	76.0416	52.555	0	2
3.99702	14.1163	9.92978	87.9841	43.4801	0	2
4.57687	7.05481	4.96254	90.2594	46.081	0	2
4.89501	14.6716	10.3204	89.5398	45.3017	0	2
4.29497	14.7665	10.3871	75.2458	36.5385	0	2
3.7757	1.0514	0.739584	66.3346	211.162	0	2
4.16857	1.84	1.2943	49.5657	223.266	0	2
3.78997	0.765935	0.538779	53.2006	201.229	0	2
3.87765	1.54588	1.08741	46.26	207.36	0	2
3.95082	0.710383	0.499702	49.6412	197.262	0	2
4.12686	1.66501	1.17122	53.9445	183.133	0	2
4.01425	1.41338	0.994207	50.5011	188.988	0	2
4.57823	2.26757	1.59507	56.6587	170.688	0	2
3.71154	0.788462	0.554625	45.9692	171.773	0	2
4.24202	1.64362	1.15616	49.0492	171.822	0	2
4.27278	1.51211	1.06366	47.0081	183.45	0	2
4.07273	1.55974	1.09716	64.0779	172.679	0	2
4.56484	2.00998	1.41387	61.9239	160.89	0	2
4.63226	1.62525	1.14324	57.3788	165.236	0	2
4.29339	1.31467	0.924773	48.7581	158.261	0	2
4.17184	1.60263	1.12733	57.4356	162.618	0	2
4.10283	1.37618	0.96804	55.9734	154.44	0	2
4.20321	1.52807	1.07489	60.865	142.785	0	2
4.4695	1.05438	0.741677	52.1751	150.583	0	2
3.69138	0.749499	0.527217	90.0321	132.511	0	2
4.62387	2.35248	1.6548	66.1002	135.757	0	2
4.59016	2.09133	1.4711	65.5703	134.637	0	2
4.61679	2.38428	1.67717	67.0624	129.848	0	2
4.17549	1.47549	1.0379	63.4196	143.654	0	2
4.1119	1.16137	0.816936	61.9717	136.215	0	2
4.60958	1.51856	1.0682	64.3545	135.355	0	2
4.71019	2.06456	1.45227	64.7116	119.56	0	2
4.50232	1.79234	1.26078	65.6775	129.844	0	2
4.66403	1.88192	1.32379	60.9544	112.887	0	2
5.21398	2.62818	1.84873	69.678	117.233	0	2
4.28989	1.37899	0.970018	63.1995	116.108	0	2
5.14969	2.65489	1.86752	82.0229	105.558	0	2
5.08835	3.09639	2.17808	83.6094	101.366	0	2
5.37923	3.38623	2.38196	91.5438	106.154	0	2
4.38373	1.57159	1.1055	73.9026	90.6851	0	2
4.91125	1.42875	1.00502	68.6612	105.996	0	2
4.32998	2.30984	1.62481	72.7427	89.7188	0	2
5.01592	2.599	1.82821	69.6109	99.7684	0	2
4.80801	2.08826	1.46894	82.7907	101.955	0	2
4.35334	2.18353	1.53596	94.6758	94.713	0	2
5.73285	6.28482	4.42091	103.927	74.282	0	2
4.73053	2.92737	2.05919	77.8179	65.5918	0	2
4.57399	2.82735	1.98884	128.839	69.4241	0	2
5.59589	4.02055	2.82816	105.492	69.1238	0	2
4.26908	6.69987	4.71287	76.9508	51.708	0	2
4.12162	11.265	7.92411	87.2387	47.2649	0	2
3.81468	3.22503	2.26857	75.5439	49.9754	0	2
4.90737	5.90827	4.15604	103.548	58.4177	0	2
4.9125	3.20833	2.25683	119.59	53.2846	0	2
4.70033	2.11196	1.48561	140.79	65.1187	0	2
3.79815	3.93918	2.77092	98.1053	41.2803	0	2
4.78394	16.5809	11.6635	90.2383	40.4614	0	2
4.24011	7.99736	5.62556	99.9525	44.0192	0	2
3.85254	1.04089	0.732191	49.829	214.259	0	2
3.6226	1.24414	0.875159	46.9136	219.851	0	2
4.24259	1.82749	1.28551	44.6563	209.102	0	2
3.65698	0.789765	0.555542	48.0968	225.42	0	2
4.05498	1.93338	1.35999	41.5699	202.524	0	2
3.81651	0.721713	0.507672	80.0688	195.452	0	2
4.0365	1.51393	1.06494	47.9962	193.639	0	2
4.18822	1.60358	1.128	46.5773	190.218	0	2
3.80533	1.22957	0.864911	53.4206	171.086	0	2
3.90088	1.47357	1.03655	63.5859	166.166	0	2
4.25673	0.954451	0.671386	51.3996	177.773	0	2
3.83383	1.17665	0.827684	48	159.723	0	2
3.82786	1.08583	0.763799	54.2923	150.894	0	2
4.12027	1.27255	0.895146	63.515	146.447	0	2
4.23157	1.90553	1.3404	66.174	146.88	0	2
4.01627	0.869801	0.611841	62.7866	145.088	0	2
4.43703	2.35013	1.65314	72.6159	135.657	0	2
3.9812	0.68797	0.483936	72.8346	140.551	0	2
4.04545	0.768328	0.540463	62.9457	126.198	0	2
4.84512	2.01796	1.41948	65.7508	127.569	0	2
4.88453	3.22658	2.26966	66.5196	117.972	0	2
4.67606	2.2007	1.54803	63.5998	130.364	0	2
4.07249	0.890533	0.626424	55.9793	129.811	0	2
4.89454	2.31141	1.62591	69.9454	116.922	0	2
4.28755	1.59657	1.12307	62.9399	127.672	0	2
4.70833	1.83102	1.28799	64.7431	114.582	0	2
4.79476	2.74027	1.92758	74.0226	106.689	0	2
4.68776	1.59647	1.123	85.5488	115.259	0	2
4.58463	2.10022	1.47735	67.1347	117.71	0	2
4.82143	1.20503	0.847648	69.7037	113.622	0	2
4.86621	2.37642	1.67163	98.6848	88.1886	0	2
4.39286	2.35248	1.6548	69.0699	87.1495	0	2
4.84657	2.68455	1.88838	77.5987	92.9569	0	2
5.02262	4.93213	3.46939	85.1029	72.1649	0	2
5.18588	7.36888	5.18346	76.2896	69.3508	0	2
5.07028	1.93218	1.35915	75.2663	82.5129	0	2
5.19549	2.39245	1.68292	92.2513	78.9503	0	2
5.39574	11.227	7.89733	99.766	45.6867	0	2
5.11173	11.5808	8.14621	92.6416	47.0737	0	2
4.20789	14.9147	10.4914	85.7463	39.7815	0	2
4.15005	22.3192	15.6999	77.8348	31.0314	0	2
4.60146	16.6318	11.6992	74.7824	32.3268	0	2
3.30796	9.31565	6.55288	74.8931	27.6322	0	2
3.32234	14.413	10.1385	90.127	23.5804	0	2
5.06745	9.18737	6.46264	77.6017	36.6475	0	2
3.93988	13.8497	9.74225	97.986	29.8968	0	2
4.12429	22.9343	16.1326	86.0134	26.6721	0	2
3.75023	18.5846	13.0729	78.6208	26.52	0	2
3.68506	0.668966	0.470568	46.0322	229.546	0	2
3.74592	0.875681	0.615977	50.0136	200.629	0	2
3.90732	1.78326	1.25439	47.997	201.953	0	2
3.87762	1.25641	0.883792	45.5781	202.271	0	2
3.83216	0.861502	0.606004	54.0516	191.763	0	2
3.79318	1.24442	0.875357	64.2315	181.246	0	2
3.91119	1.01776	0.715921	45.357	179.114	0	2
4.23372	1.36143	0.957666	41.7024	181.518	0	2
4.54669	2.47114	1.73827	48.6831	165.04	0	2
4.12609	2.03152	1.42903	59.1391	166.332	0	2
4.03226	1.12366	0.790409	61.7043	151.822	0	2
4.4457	1.16403	0.818808	50.345	163.407	0	2
3.8693	1.02634	0.721956	62.1753	131.892	0	2
4.41518	1.67522	1.1784	58.4152	137.953	0	2
4.26441	2.32505	1.6355	65.4374	113.878	0	2
5.00101	1.53893	1.08252	70.3023	125.564	0	2
4.425	2.39189	1.68252	71.1581	106.054	0	2
4.32227	2.82013	1.98375	74.9529	107.014	0	2
4.18429	1.47853	1.04004	62.4817	108.042	0	2
4.27522	2.23009	1.5687	80.4531	97.2245	0	2
4.19841	1.14762	0.807266	69.4	111.248	0	2
4.76591	3.575	2.51475	80.1114	97.5818	0	2
4.42634	1.54129	1.08419	68.4587	103.647	0	2
4.51841	1.39147	0.978799	64.4467	105.924	0	2
5.93244	2.688	1.89081	88.2844	98.6879	0	2
4.57471	1.02949	0.724167	88.3968	93.8209	0	2
4.67946	2.48464	1.74777	94.5173	94.2738	0	2
4.31863	2.81065	1.97708	80.8715	81.3965	0	2
5.22321	4.69444	3.3022	88.1111	69.8466	0	2
4.67486	1.82798	1.28585	77.9301	84.2597	0	2
4.60287	3.93589	2.76861	85.9368	68.8112	0	2
4.78914	3.29499	2.31779	80.0714	75.9198	0	2
4.67943	6.57163	4.62266	74.6922	57.5414	0	2
5.05867	4.94133	3.47586	72.219	58.0843	0	2
4.69585	4.34747	3.05812	100.65	61.8781	0	2
4.09583	6.52198	4.58774	81.4273	53.5648	0	2
4.70746	10.003	7.03636	115.19	45.5866	0	2
4.37652	5.20652	3.66241	105.829	32.6418	0	2
5.25144	20.1464	14.1715	90.1917	31.6273	0	2
3.66156	11.2849	7.93807	81.2457	25.3887	0	2
5.23882	6.38969	4.49468	96.6975	38.0208	0	2
4.8797	16.9925	11.953	81.7895	31.1652	0	2
5.62207	20.738	14.5877	82.0624	34.6683	0	2
4.38474	25.0731	17.637	102.196	28.4668	0	2
5.05918	5.3308	3.74983	110.227	28.22	0	2
3.78838	1.17289	0.825042	38.4827	222.951	0	2
3.75783	0.624217	0.439091	33.9478	222.648	0	2
3.73605	1.20601	0.848338	41.2908	208.799	0	2
3.5257	0.580029	0.408008	47.1468	200.332	0	2
3.82651	0.77193	0.542996	38.8674	200.026	0	2
4.02628	1.40382	0.987486	41.8984	199.941	0	2
4.17014	1.80132	1.26709	46.2843	177.183	0	2
3.8178	1.63136	1.14754	48.6038	178.358	0	2
4.08565	1.7662	1.24239	51.4259	178.3	0	2
3.89792	0.991667	0.697565	46.5042	165.905	0	2
3.93081	0.941622	0.662362	51.9135	162.18	0	2
3.86237	1.65983	1.16757	55.9771	141.365	0	2
4.39187	1.34207	0.944048	59.7379	142.82	0	2
3.88483	0.623596	0.438654	60.4312	124.93	0	2
4.33144	1.1322	0.79642	59.6308	134.207	0	2
4.02813	0.84375	0.593516	75.0885	129.168	0	2
4.79484	2.0639	1.4518	61.0852	120.068	0	2
4.158	1.55613	1.09463	64.8233	106.96	0	2
4.98429	0.804538	0.565933	75.7557	92.942	0	2
4.29794	1.81959	1.27995	72.601	84.3508	0	2
4.84898	6.5685	4.62046	80.1165	72.9631	0	2
4.91523	2.10861	1.48325	66.7907	77.514	0	2
5.51282	5.01007	3.52422	84.0458	79.0154	0	2
4.85514	1.78621	1.25647	71.5537	77.3468	0	2
4.76823	4.58995	3.22869	76.0908	60.4866	0	2
5.05011	8.76759	6.16736	83.8817	59.243	0	2
5.16066	5.10665	3.59215	98.3837	70.176	0	2
4.78036	2.21578	1.55864	86.2135	70.1563	0	2
5.09815	8.33697	5.86444	71.7895	57.853	0	2
4.96201	10.348	7.27909	76.4235	54.557	0	2
4.741	5.98615	4.21082	78.8684	48.4914	0	2
4.90119	8.26905	5.81667	78.0452	51.0555	0	2
4.46853	3.98182	2.80092	85.3063	50.3843	0	2
4.70769	4.13394	2.90792	88.9964	53.0977	0	2
4.85197	14.3509	10.0948	80.8841	39.0941	0	2
5.26228	4.73772	3.33264	123.873	47.4114	0	2
3.48019	19.8454	13.9598	83.223	25.5973	0	2
4.55298	8.4702	5.95816	111.066	22.36	0	2
3.67606	0.954225	0.671227	37.8151	223.263	0	2
3.7257	1.26566	0.890298	37.9125	218.007	0	2
3.83194	1.10369	0.776368	41.329	203.681	0	2
3.40686	0.566993	0.398838	41.4395	188.278	0	2
3.75391	1.02344	0.719913	40.9141	177.114	0	2
3.77737	1.01825	0.716263	59.4562	173.78	0	2
3.81014	1.57607	1.10865	43.4525	184.751	0	2
3.79522	0.93763	0.659554	52.5062	153.156	0	2
3.77736	0.613184	0.43133	70.5572	156.421	0	2
3.95741	0.910562	0.640514	54.7836	139.695	0	2
4.05202	1.61614	1.13684	58.1435	129.07	0	2
4.22871	1.12632	0.79228	59.1177	126.592	0	2
4.5	1.36344	0.959077	70.913	108.93	0	2
4.9469	1.85054	1.30172	69.3825	107.595	0	2
4.48296	1.60296	1.12757	71.2385	107.879	0	2
4.89811	2.9283	2.05985	72.8	91.4568	0	2
4.24467	1.5073	1.06027	64.9248	88.328	0	2
4.87703	1.13998	0.801895	72.8848	92.0873	0	2
4.60858	1.6867	1.18647	74.2086	86.1355	0	2
4.24465	2.6157	1.83995	72.317	68.0382	0	2
4.62283	4.50561	3.16936	79.419	53.8554	0	2
4.59768	9.29801	6.54047	85.5728	46.7039	0	2
5.19113	1.06314	0.747841	98.6314	61.1896	0	2
4.89901	11.9089	8.37701	81.016	46.8966	0	2
4.47773	5.49005	3.86184	84.4872	53.7695	0	2
4.78191	11.0771	7.79195	92.5066	43.9666	0	2
6.06554	4.27119	3.00447	131.121	49.3574	0	2
3.92296	4.1148	2.89446	93.5725	31.206	0	2
4.89704	4.79923	3.3759	84.0489	49.1415	0	2
4.69011	5.24448	3.68911	95.556	37.2017	0	2
5.30709	13.0671	9.19171	83.7123	37.0101	0	2
5.16405	5.27923	3.71355	94.8595	40.8113	0	2
4.96038	2.83518	1.99434	116.043	31.2892	0	2
4.90677	12.4229	8.73857	109.008	25.9405	0	2
4.54492	25.0674	17.6331	78.1868	18.8845	0	2
3.70044	28.726	20.2066	98.5797	10.2283	0	2
3.64876	0.717508	0.504714	39.8625	218.068	0	2
3.74895	0.770042	0.541668	35.5527	224.254	0	2
3.34852	1.04449	0.734723	43.3051	209.659	0	2
3.76075	1.17751	0.828291	38.9405	207.035	0	2
3.51463	0.843373	0.593251	36.389	203.766	0	2
3.51603	0.860058	0.604988	39.3003	189.405	0	2
3.78879	1.44828	1.01876	46.3653	181.252	0	2
3.51155	1.42437	1.00194	45.4664	176.167	0	2
4.07119	1.9887	1.3989	48.5989	171.276	0	2
3.73521	0.595775	0.419084	52.4831	184.144	0	2
3.52156	0.570712	0.401454	68.01	160.95	0	2
3.79744	1.32303	0.930653	44.4733	164.041	0	2
4.2007	3.5	2.46199	56.0093	152.384	0	2
4.06093	1.90199	1.33791	53.5073	143.934	0	2
3.88	0.616471	0.433642	64.6118	157.141	0	2
4.40078	2.64418	1.85999	57.1926	130.604	0	2
4.24215	1.6435	1.15608	64.5897	125.578	0	2
3.93968	1.88254	1.32423	64.4381	108.972	0	2
4.40472	1.36207	0.958115	56.5073	120.609	0	2
4.03154	1.04322	0.733832	58.5572	120.232	0	2
4.21143	1.52381	1.07189	62.6438	114.54	0	2
4.40084	2.2636	1.59228	72.1766	90.892	0	2
4.614	5.9605	4.19277	77.079	83.7236	0	2
3.97178	1.96074	1.37923	65.6356	85.6921	0	2
4.28096	1.80559	1.2701	94.2011	86.6687	0	2
4.11534	3.62751	2.55169	63.2455	76.3737	0	2
4.97342	4.23831	2.98134	75.5124	73.9701	0	2
5.13197	1.4368	1.01069	107.325	65.249	0	2
4.13655	1.39759	0.983102	118.268	57.9967	0	2
4.76238	11.0752	7.79062	81.1436	56.2153	0	2
4.77913	16.232	11.418	83.5649	25.5453	0	2
4.87234	12.1813	8.56863	99.2647	24.1783	0	2
4.86726	21.6527	15.2311	73.3462	27.4749	0	2
4.91281	2.8842	2.02882	92.2016	26.7738	0	2
4.87687	21.6689	15.2425	103.707	19.3919	0	2
4.54145	23.0131	16.188	89.5498	11.1165	0	2
4.50415	8.9801	6.31684	109.655	14.477	0	2
4.69555	27.1733	19.1144	129.839	12.0208	0	2
4.7744	6.43151	4.5241	113.862	22.5325	0	2
4.49457	25.7826	18.1362	78.6022	15.9365	0	2
3.73548	1.28863	0.906455	36.8059	219.725	0	2
3.382	0.542	0.381257	40.882	212.229	0	2
3.61497	1.3984	0.983669	38.8021	198.048	0	2
3.64981	1.16537	0.819752	50.5126	177.173	0	2
3.56511	0.724399	0.509562	66.0316	156.759	0	2
3.7721	0.430255	0.302653	44.9253	167.91	0	2
3.67426	0.978552	0.68834	44.1542	134.826	0	2
3.70671	0.567138	0.39894	50.841	150.265	0	2
3.81425	1.35335	0.951984	53.1285	127.757	0	2
4.03723	1.27837	0.899239	56.6578	139.966	0	2
4.00617	0.848921	0.597153	67.0966	129.016	0	2
4.51887	2.6592	1.87055	57.3078	121.897	0	2
4.2681	1.36693	0.961533	62.9423	114.858	0	2
4.34398	1.32664	0.933195	67.5776	104.305	0	2
4.73529	2.80196	1.97097	71.751	91.6425	0	2
4.18833	4.69294	3.30114	79.5491	66.273	0	2
4.94494	9.47984	6.66837	86.4031	55.1848	0	2
4.61378	3.07585	2.16364	81.5124	64.4621	0	2
4.67226	7.92058	5.57155	102.957	51.3434	0	2
5.20599	18.6841	13.1429	87.8876	31.545	0	2
5.53519	12.2324	8.6046	88.9774	41.0275	0	2
4.62757	25.2463	17.7589	79.3206	19.1972	0	2
5.44284	35.5771	25.0259	81.3285	21.4874	0	2
5.37801	33.1397	23.3114	90.0057	19.1157	0	2
5.36739	44.2717	31.1419	87.1837	14.8514	0	2
4.01593	29.4704	20.7303	87.5296	7.00928	0	2
3.49674	28.0024	19.6977	90.31	5.1	0	2
3.48233	14.3092	10.0655	99.4187	6.77445	0	2
3.74791	17.9594	12.6331	84.3047	14.3164	0	2
4.19555	30.1566	21.213	77.5525	8.16	0	2
3.93814	38.2387	26.8981	85.1086	6.49569	0	2
3.19398	0.429584	0.302181	38.6616	203.538	0	2
3.39759	1.44578	1.017	40.0813	196.734	0	2
3.42541	1.20331	0.846444	40.9558	192.095	0	2
3.49493	1.09736	0.771914	44.1136	180.932	0	2
3.58095	0.82381	0.579489	47.0968	177.037	0	2
3.59825	0.939689	0.661002	38.2733	177.776	0	2
3.4965	0.844406	0.593977	33.7832	182.428	0	2
3.98634	1.41282	0.993812	55.7689	147.767	0	2
3.57647	0.541176	0.380678	60.8071	148.906	0	2
4.38189	0.807087	0.567726	55.6024	139.627	0	2
3.74931	1.37397	0.966486	70.648	118.344	0	2
4.10314	2.10673	1.48193	58.1628	117.44	0	2
4.36117	3.63124	2.55431	71.6356	96.5654	0	2
3.71627	0.802944	0.564812	77.6705	90.9276	0	2
4.5818	4.53546	3.19036	71.1826	92.1801	0	2
4.87856	6.05152	4.2568	81.069	64.5105	0	2
4.45512	2.61142	1.83695	68.9247	76.7956	0	2
3.99377	2.50873	1.76471	71.9576	69.4508	0	2
4.48159	3.36672	2.36824	75.4647	54.7569	0	2
4.99461	13.142	9.2444	93.1689	44.7265	0	2
4.99189	10.9212	7.68227	81.7659	45.6867	0	2
5.12251	19.5152	13.7275	93.1791	36.5385	0	2
4.83215	2.78362	1.95807	133.125	42.61	0	2
4.41498	16.17	11.3744	95.9342	19.6201	0	2
5.19476	12.4182	8.73531	85.1523	26.8858	0	2
5.30769	21.2383	14.9396	100.83	18.278	0	2
5.15098	29.2841	20.5992	91.8041	12.3575	0	2
4.46518	38.4554	27.0506	112.568	13.5489	0	2
4.58378	48.3856	34.0357	87.2473	7.21249	0	2
3.78647	1.82452	1.28342	35.8309	202.453	0	2
3.50761	0.903553	0.635583	37.8617	213.457	0	2
3.16904	0.590747	0.415547	39.1975	202.722	0	2
3.40068	0.465753	0.327623	37.9007	188.428	0	2
3.27121	0.491039	0.34541	41.7885	186.652	0	2
3.68278	1.06444	0.748753	58.4523	159.605	0	2
4.20978	0.635647	0.447131	81.8407	158.6	0	2
3.52439	0.58349	0.410442	44.5366	145.557	0	2
3.43803	0.465195	0.327231	45.8421	151.722	0	2
4.02964	1.76809	1.24372	57.7001	125.592	0	2
4.05107	2.14949	1.51201	62.6407	100.591	0	2
4.53134	2.98575	2.10026	59.5271	90.9276	0	2
4.16184	2.1597	1.51919	101.891	78.2739	0	2
4.20641	2.58837	1.82073	60.2289	79.0747	0	2
5.28388	14.4249	10.1469	90.2399	56.4983	0	2
4.02187	2.86999	2.01883	67.3815	63.5291	0	2
4.6455	4.21232	2.96306	79.981	66.5054	0	2
4.71839	4.22701	2.97339	89.6638	60.1877	0	2
4.79982	5.14764	3.62099	88.6341	50.733	0	2
4.80704	5.87136	4.13007	94.072	34.5146	0	2
4.6222	6.71373	4.72262	69.7381	44.7781	0	2
4.78335	16.618	11.6896	79.8005	36.0079	0	2
4.7269	10.4867	7.37659	70.3583	32.6489	0	2
5.02687	25.0349	17.6102	104.626	20.8096	0	2
5.34994	20.5828	14.4785	80.3462	31.206	0	2
5.16383	12.0376	8.46758	79.5425	11.6843	0	2
2.96	0.464444	0.326703	38.0933	210.253	0	2
3.56057	0.804124	0.565642	44.0232	215.242	0	2
3.5764	0.760155	0.534713	41.2979	199.793	0	2
3.28846	0.680769	0.478871	37.6019	207.756	0	2
3.18763	0.584222	0.410957	35.9041	193.706	0	2
3.67125	0.537827	0.378322	53.9587	185.604	0	2
3.55556	0.823468	0.579249	50.7134	174.637	0	2
3.65317	1.2162	0.855508	44.5282	164.602	0	2
3.68983	1.09429	0.769755	48.2655	167.413	0	2
3.6714	1.43182	1.00718	45.6951	155.005	0	2
3.81671	1.33713	0.940574	52.2896	136.751	0	2
4.33238	0.916905	0.644976	43.2622	134.348	0	2
3.52755	0.819461	0.57643	41.1395	125.807	0	2
3.9597	0.921914	0.648499	76.8841	114.168	0	2
4.42589	2.01383	1.41658	61.7866	102.851	0	2
4.21317	2.66823	1.87691	64.4781	84.3926	0	2
3.99113	2.7879	1.96109	63.8573	78.9532	0	2
3.83586	1.39773	0.983198	55.8939	80.8235	0	2
4.38402	2.29467	1.61413	65.6392	89.9363	0	2
4.06528	2.29773	1.61628	59.7201	75.362	0	2
4.26955	3.3743	2.37357	74.7807	56.0742	0	2
4.74571	19.3451	13.6079	79.8426	38.9445	0	2
4.50887	8.38375	5.89735	78.9057	40.0017	0	2
6.16637	10.7423	7.55643	96.2405	47.5344	0	2
4.87427	25.2592	17.768	97.7872	32.7831	0	2
5.05908	13.306	9.35979	85.3007	31.9329	0	2
5.10966	21.8883	15.3968	91.7022	24.633	0	2
5.68548	34.7168	24.4207	94.0421	20.4113	0	2
5.27463	24.8501	17.4802	87.4827	12.3153	0	2
4.79137	29.4224	20.6965	86.8756	7.9592	0	2
5.38245	34.024	23.9334	102.646	11.22	0	2
4.99241	30.0924	21.1678	90.4304	5.86931	0	2
3.81478	2.5415	1.78776	38.7601	191.131	0	2
3.55444	0.826613	0.581461	32.625	196.022	0	2
3.57354	1.43915	1.01234	40.0148	179.78	0	2
3.93301	1.10287	0.775789	54.0311	153.138	0	2
3.49597	1.14235	0.803556	50.2229	128.889	0	2
3.80361	0.6614	0.465246	61.605	139.722	0	2
4.43472	4.64722	3.26898	65.8931	83.5771	0	2
4.94758	2.35868	1.65916	71.0031	85.0856	0	2
4.07825	5.66159	3.98251	70.25	59.071	0	2
5.47555	4.74194	3.3356	81.3434	74.453	0	2
4.89943	7.39002	5.19834	76.7016	55.9091	0	2
4.59809	12.444	8.75345	72.688	39.5717	0	2
4.7112	5.39537	3.79524	81.3737	52.1543	0	2
4.80632	19.9773	14.0526	89.6742	27.3399	0	2
4.84031	28.2621	19.8803	72.239	32.7037	0	2
6.59779	26.2675	18.4773	105.175	32.3429	0	2
4.77766	5.10647	3.59203	120.592	17.7973	0	2
4.77944	30.5159	21.4657	79.215	5.1	0	2
3.23313	0.645399	0.453991	43.5939	220.174	0	2
3.35971	0.542778	0.381805	32.115	227.451	0	2
3.24677	0.497062	0.349647	34.0282	218.294	0	2
3.32184	0.714559	0.50264	40.7203	198.022	0	2
3.56818	1.21104	0.851877	36.1916	204.979	0	2
3.61935	1.71714	1.20788	39.061	184.468	0	2
3.71447	0.773585	0.54416	47.834	171.863	0	2
4.29991	2.24172	1.57688	66.2641	92.2754	0	2
4.09428	4.23906	2.98187	63.9343	75.2814	0	2
4.72539	3.42746	2.41097	72.0337	48.639	0	2
4.94924	19.0538	13.403	76.7147	36.9851	0	2
4.99913	10.4238	7.33241	84.9356	45.9692	0	2
4.20356	7.3855	5.19515	74.0534	33.7149	0	2
4.93645	34.3579	24.1682	79.9164	24.8572	0	2
5.10451	30.3349	21.3384	80.019	17.888	0	2
5.00301	19.2261	13.5241	85.7227	12.0496	0	2
5.1285	3.94185	2.7728	115.289	5.86931	0	2
5.25517	4.23514	2.97911	118.598	4.53617	0	2
5.17546	3.68595	2.5928	116.314	3.06	0	2
3.35786	0.721945	0.507835	43.4027	228.511	0	2
3.26478	1.02837	0.723382	38.2612	207.014	0	2
3.09808	0.488273	0.343464	32.8038	220.699	0	2
3.25517	0.652874	0.459249	31.9379	218.106	0	2
3.51486	1.28662	0.905046	42.7537	200.623	0	2
3.4058	1.18357	0.832558	37.3053	192.682	0	2
4.06534	0.911932	0.641477	48.1705	195.117	0	2
3.59754	0.546573	0.384474	31.348	189.314	0	2
3.34683	1.10212	0.775258	38.7194	171.507	0	2
4.1648	1.06052	0.745999	54.3976	122.883	0	2
3.83333	1.24365	0.87482	56.78	107.623	0	2
3.91024	1.36133	0.957599	59.4327	97.4828	0	2
3.78073	3.29236	2.31593	80.2176	60.5668	0	2
5.17107	6.24145	4.3904	82.6843	67.3002	0	2
4.3864	3.85063	2.70863	65.8497	63.4717	0	2
4.24673	8.61103	6.05723	83.3861	43.6049	0	2
5.17134	18.0312	12.6836	79.8832	40.8708	0	2
4.76799	22.9881	16.1705	86.0542	14.6042	0	2
4.88364	36.7695	25.8646	87.2953	2.28079	0	2
3.32483	0.755102	0.531159	44.8929	194.886	0	2
3.43687	1.06413	0.748536	48.9659	177.36	0	2
3.89734	2.3703	1.66733	59.8084	104.048	0	2
3.64447	1.42623	1.00325	87.8217	90.7297	0	2
4.39769	6.46494	4.54761	62.4006	79.2441	0	2
4.74263	10.8733	7.64855	67.276	68.859	0	2
5.05722	3.54936	2.49671	83.3333	47.1608	0	2
4.36305	10.3796	7.30128	74.8649	39.6811	0	2
5.01553	23.871	16.7915	80.7037	27.9069	0	2
4.77328	20.8612	14.6743	80.275	26.9974	0	2
5.55783	22.5151	15.8377	87.3737	22.5043	0	2
5.63762	5.09306	3.58259	123.377	1.98252	0	2
4.59534	1.56477	1.1007	57.7045	95.5926	0	2
4.28875	12.9834	9.13286	79.0424	52.1543	0	2
4.05299	8.20788	5.77364	70.6223	47.4358	0	2
5	13.8074	9.7125	82.5452	27.2531	0	2
5.39615	3.97	2.7926	104.072	8.2235	0	2
5.53515	4.38662	3.08567	111.825	3.4	0	2
3.39775	0.747191	0.525594	41.5371	161.122	0	2
3.0576	4.65275	3.27287	66.0634	126.094	0	2
4.11711	3.89079	2.73688	59.9829	70.394	0	2
3.82759	8.18966	5.76082	64.4224	45.0907	0	2
4.24635	8.82765	6.20961	74.9523	53.5184	0	2
4.85089	15.8492	11.1488	96.5654	41.5482	0	2
4.98803	26.7473	18.8148	68.6822	25.0518	0	2
5.69063	6.86586	4.82963	106.051	7.84951	0	2
2.98962	0.785467	0.552518	43.7509	205.086	0	2
2.87728	0.626632	0.440789	34.3029	197.538	0	2
3.41433	0.716292	0.503859	39.4059	199.943	0	2
3.3216	6.74761	4.74645	70.2321	103.785	0	2
4.09293	1.18194	0.831406	55.3822	79.3862	0	2
4.90789	8.06579	5.67369	105.301	19.2843	0	2
5.87018	6.51113	4.5801	117.938	9.15478	0	2
3.318	1.348	0.948219	44.275	205.788	0	2
3.10462	3.65881	2.57371	48.164	165.441	0	2
3.97572	4.00626	2.81811	60.8755	133.492	0	2
3.69519	6.54635	4.60487	61.5517	119.488	0	2
3.90829	5.38713	3.78945	61.0044	124.544	0	2
3.50745	5.54844	3.90292	60.6073	108.262	0	2
5.1211	16.556	11.6459	81.822	41.2074	0	2
4.96117	9.17476	6.45377	113.507	23.4822	0	2
4.53617	10.7497	7.56163	84.7302	90.7775	0	2
4.70398	6.10118	4.29173	93.7729	52.7274	0	2
4.71885	6.35328	4.46906	100.523	20.5384	0	2
4.93886	8.19505	5.76462	112.988	36.5385	0	2
4.52124	4.81982	3.39039	94.825	26.9974	0	2
53.5014	2.2765	1.46469	59.2407	79.2441	1	3
47.5839	2.43493	1.56662	58.714	85.6935	1	3
45.4125	2.71734	1.74832	61.0854	78.3248	1	3
83.1574	3.13341	2.01602	52.2771	80.24	1	3
87.918	5.04098	3.24334	54.4508	77.0091	1	3
93.08	4.47385	2.87845	47.6615	74.6058	1	3
66.7193	5.24114	3.37212	33.7616	76.7482	1	3
8.05132	8.89736	5.72451	36.5968	71.06	1	3
42.7942	1.52308	0.97994	27.9827	134.697	1	3
34.7694	1.97083	1.26802	31.3958	103.367	1	3
41.5778	1.52407	0.980581	26.1481	139.659	1	3
40.8056	2.55521	1.64401	34.0187	76.5778	1	3
60.8743	4.85754	3.12532	34.2402	91.7124	1	3
24.5099	5.46742	3.51771	28.2266	85.019	1	3
21.7993	3.33702	2.14702	29.639	74.8657	1	3
22.0712	2.92714	1.8833	28.7739	100.666	1	3
33.9613	2.37475	1.5279	27.3564	108.214	1	3
37.9225	2.44341	1.57208	22.9473	170.68	1	3
33.9735	5.37566	3.45867	36.0304	69.3675	1	3
24.6417	3.01361	1.93894	25.2449	96.6157	1	3
13.8192	1.4774	0.950552	23.1469	137.988	1	3
9.08392	1.58741	1.02133	21.5897	148.316	1	3
33.0516	4.78387	3.07792	24.029	140.019	1	3
50.6216	3.22604	2.07562	22.5946	154.7	1	3
52.7866	6.16822	3.9686	32.9019	61.8174	1	3
39.1073	7.97019	5.12798	30.0566	91.0369	1	3
50.687	5.0537	3.25153	25.5481	101.46	1	3
65.2057	5.52128	3.55236	32.2246	86.7447	1	3
40.7056	6.64474	4.27519	29.8092	74.9143	1	3
23.997	5.10319	3.28336	27.9788	84.9327	1	3
17.9641	1.23904	0.797194	30.5378	110.955	1	3
38.6366	4.24507	2.73126	21.8704	199.827	1	3
23.307	2.85352	1.83594	21.631	130.424	1	3
31.0599	3.96806	2.55303	20.483	136.043	1	3
26.5706	4.79473	3.0849	23.2618	164.22	1	3
36.0587	3.20157	2.05987	21.8356	146.54	1	3
43.7169	4.46231	2.87103	27.9263	84.1223	1	3
49.7767	3.98382	2.56317	28.4919	80.376	1	3
44.2796	25.8216	16.6135	34.0652	47.7467	1	3
64.8311	50.796	32.6819	57.3417	29.5722	1	3
16.6842	2.51754	1.61977	20.231	212.04	1	3
24.2986	8.46479	5.4462	24.093	171.26	1	3
21.3748	20.8932	13.4426	50.332	37.508	1	3
9.56439	3.45628	2.22375	25.0207	105.095	1	3
25.0431	9.87451	6.35321	36.3078	54.4446	1	3
31.2189	5.54528	3.56781	23.7264	80.5879	1	3
12.2701	2.02139	1.30055	22.3476	159.705	1	3
48.3268	5.21078	3.35259	29.969	145.587	1	3
31.0942	2.7343	1.75923	19.1473	175.939	1	3
18.1619	3.26667	2.10176	22.4794	178.112	1	3
52.3407	5.98525	3.85088	29.0619	88.9748	1	3
13.244	4.52778	2.91315	27.9802	87.0566	1	3
31.4364	10.6075	6.82478	30.8158	78.6165	1	3
59.4268	44.1718	28.4199	48.7785	23.4772	1	3
27.8644	3.09538	1.99155	31.3681	126.608	1	3
58.5559	6.88963	4.43275	32.5745	101.377	1	3
58.5648	4.76126	3.06337	29.7176	112.491	1	3
16.9915	5.68034	3.6547	34.8359	66.5193	1	3
44.9412	6.66544	4.28851	29.8667	102.028	1	3
33.1866	2.02782	1.30469	24.4877	124.45	1	3
16.6923	7.48298	4.81451	38.9319	77.2818	1	3
36.7552	11.6776	7.5133	39.2022	83.7753	1	3
29.181	9.39314	6.04349	35.2621	73.7236	1	3
47.0019	27.396	17.6264	49.3139	53.0945	1	3
51.7535	12.5575	8.07944	31.5364	54.333	1	3
36.7035	7.13298	4.58932	32.5824	112.421	1	3
25.2264	2.17925	1.40211	37.3302	73.1435	1	3
44.548	10.3646	6.66855	36.5262	43.2282	1	3
27.3841	5.8587	3.76945	29.7138	68	1	3
41.5311	5.81988	3.74448	28.8106	91.46	1	3
32.7875	4.52	2.90814	21.54	187.232	1	3
48.144	28.8756	18.5784	47.0945	39.9424	1	3
37.5502	1.6318	1.04989	21.0314	134.649	1	3
24.4609	6.05217	3.89394	25.7026	109.943	1	3
30.0706	6.32824	4.07155	34.8447	73.7173	1	3
20.3069	7.04826	4.53481	25.9421	135.167	1	3
30.4503	18.8126	12.1039	34.6713	61.6535	1	3
24.4387	5.50084	3.53921	32.1412	118.125	1	3
45.9117	32.5254	20.9267	46.7925	34.2051	1	3
26.0039	8.09756	5.20993	33.9317	90.4387	1	3
28.0843	7.31901	4.70901	32.8364	91.491	1	3
29.3244	8.43866	5.42939	34.3966	55.42	1	3
54.0418	14.3107	9.20745	40.6497	44.2	1	3
59.1736	4.56136	2.93475	33.6345	101.334	1	3
32.0177	5.43363	3.49597	28.4277	93.2177	1	3
39.0999	19.1215	12.3027	37.7437	70.3373	1	3
36.4851	5.33085	3.42984	36.9502	101.674	1	3
19.7278	15.8791	10.2166	45.7941	47.2649	1	3
18.5381	8.39895	5.40384	24.0604	125.653	1	3
33.1894	28.5627	18.3771	51.4624	35.44	1	3
32.2314	9.0139	5.7995	43.9911	68.9094	1	3
22.6708	5.46217	3.51433	26.8282	111.126	1	3
35.1433	5.28013	3.39721	28.5244	116.271	1	3
39.3471	17.5049	11.2626	37.84	50.6509	1	3
23.198	7.93792	5.10721	30.1862	94.4301	1	3
26.6378	2.40222	1.54558	35.9222	73.7541	1	3
42.064	9.91516	6.37936	33.2949	84.5179	1	3
39.3511	23.4084	15.0608	52.813	49.4779	1	3
41.1873	5.01792	3.2285	31.7573	85.4882	1	3
41.7379	24.2285	15.5885	46.3266	61.1669	1	3
31.356	19.8468	12.7693	45.7929	65.9021	1	3
65.8312	37.3258	24.0152	54.1	38.42	1	3
38.0354	13.024	8.37957	39.7543	67.4435	1	3
36.569	11.894	7.65254	44.7936	96.0727	1	3
20.3734	6.70916	4.31664	29.088	108.341	1	3
30.706	7.99254	5.14236	36.4224	84.1423	1	3
36.3567	23.2555	14.9625	43.0791	44.2849	1	3
28.2648	5.09408	3.2775	29.5348	104.633	1	3
36.2494	7.09602	4.56554	37.6651	66.8427	1	3
28.2007	11.8454	7.62126	39.9868	60.0569	1	3
48.7823	14.2488	9.1676	40.4234	58.1231	1	3
46.6418	9.92883	6.38815	38.6501	61.2	1	3
57.9767	12.0675	7.76418	46.4459	58.14	1	3
33.2719	7.18561	4.62318	33.695	79.8197	1	3
25.3622	1.88782	1.21461	29.4247	104.109	1	3
32.1271	9.92248	6.38407	36.076	93.639	1	3
32.9751	8.03167	5.16754	33.302	114.038	1	3
50.5494	5.38272	3.46321	31.6451	103.343	1	3
39.4779	14.1259	9.08851	53.4988	72.2242	1	3
39.273	22.8896	14.7271	47.0899	58.6636	1	3
26.6191	15.7196	10.1139	39.1475	73.6035	1	3
26.2512	9.15537	5.89052	47.9388	58.0365	1	3
12.6163	5.6794	3.6541	42.7276	114.497	1	3
26.1854	12.4668	8.02108	37.8101	89.742	1	3
12.6704	3.75159	2.41375	62.2389	40.1977	1	3
4.50339	2.46949	1.58886	50.0966	138.074	0	3
5.30579	3.39906	2.18693	54.353	189.74	0	3
4.80462	3.24154	2.08559	59.5138	125.949	0	3
6.28466	4.76401	3.06514	68.2094	81.544	0	3
4.46127	3.28345	2.11255	67.7412	145.11	0	3
6.10788	3.44606	2.21718	60.3942	99.0264	0	3
4.7191	3.11938	2.00699	50.448	171.624	0	3
4.64944	3.35475	2.15843	41.6606	193.785	0	3
4.90343	2.96442	1.90729	52.5972	160.268	0	3
4.77153	3.10721	1.99916	51.7012	182.094	0	3
4.90011	2.43648	1.56762	58.2508	93.458	0	3
4.82767	2.28019	1.46706	63.2403	118.675	0	3
4.44353	2.00826	1.29211	50.7824	78.6724	0	3
3.83764	1.55351	0.999517	56.1661	193.652	0	3
4.72693	1.57815	1.01538	55.8531	104.295	0	3
5.6679	2.68358	1.7266	64.809	147.525	0	3
5.00396	2.8396	1.82699	69.6495	162.829	0	3
4.28723	1.43617	0.924024	57.4119	181.995	0	3
4.27729	1.21835	0.783881	50.8627	121.56	0	3
4.821	2.03903	1.3119	55.3957	154.182	0	3
4.09975	2.05237	1.32048	66.4539	146.446	0	3
3.96578	1.24335	0.799962	61.6236	191.946	0	3
6.00727	2.61682	1.68365	69.0436	96.5624	0	3
4.83117	1.97565	1.27112	59.25	87.3826	0	3
5.07348	1.9361	1.24568	54.5783	132.043	0	3
5.63189	4.18585	2.69315	62.7842	69.4508	0	3
5.46765	2.84853	1.83273	55.2603	79.8276	0	3
4.54379	1.86151	1.19768	60.0489	109.514	0	3
4.86228	2.48204	1.59693	48.8817	192.504	0	3
4.63835	1.82524	1.17435	46.4199	182.068	0	3
5.05435	1.9375	1.24658	54.197	125.259	0	3
4.63537	2.52245	1.62293	47.2054	166.169	0	3
4.93742	2.00782	1.29182	51.4263	155.286	0	3
4.66357	3.26822	2.10275	52.1008	177.298	0	3
4.40509	0.988426	0.635948	77.3681	90.5511	0	3
6.0852	1.82287	1.17282	53.3341	104.621	0	3
4.38012	1.79532	1.1551	39.4191	197.508	0	3
4.52912	1.6803	1.08109	58.223	144.636	0	3
4.8401	2.25338	1.44981	44.8229	187.957	0	3
4.37997	1.84579	1.18757	50.0986	112.372	0	3
6.26974	3.27595	2.10773	54.6584	77.724	0	3
6.08434	1.84096	1.18447	51.4434	88.2724	0	3
4.83642	1.95525	1.258	54.5448	120.016	0	3
4.96491	1.98622	1.27792	47.297	167.19	0	3
4.85173	1.68204	1.08222	51.1532	130.458	0	3
4.66355	2.52648	1.62552	51.5592	180.539	0	3
4.90303	1.93788	1.24682	57.2273	109.797	0	3
5.67914	3.48302	2.24096	54.3756	74.324	0	3
4.79096	5.10923	3.28725	68.7062	62.5203	0	3
4.19023	2.18674	1.40693	43.7923	200.903	0	3
5.51919	1.6772	1.0791	49.0248	166.579	0	3
4.71736	1.6298	1.0486	47.808	147.477	0	3
5.26342	1.73993	1.11946	58.3389	95.5255	0	3
5.37431	1.90826	1.22776	61.6752	138.368	0	3
5.12121	2.18648	1.40677	46.2751	185.125	0	3
5.37229	2.42569	1.56067	56.0332	85.1332	0	3
4.82426	2.66563	1.71505	47.423	195.409	0	3
5.96746	4.40976	2.83722	66.1272	75.948	0	3
4.33069	1.48197	0.953492	41.4301	170.641	0	3
5.00147	1.73607	1.11698	52.6554	129.168	0	3
4.49696	1.36207	0.876348	52.0629	160.432	0	3
5.23321	2.23194	1.43602	54.0621	121.973	0	3
4.86866	1.66667	1.07232	39.4015	184.072	0	3
5.0463	1.62037	1.04254	54.2855	95.7817	0	3
4.61896	1.47584	0.949545	44.6599	153.068	0	3
4.87145	1.92693	1.23978	48.3857	108.89	0	3
5.61026	5.59744	3.60136	73.6949	60.18	0	3
4.76157	1.68519	1.08424	41.4606	199.398	0	3
5.58844	1.67687	1.07889	56.1111	168.78	0	3
5.37079	5.16729	3.32461	62.8002	69.5007	0	3
4.03399	1.10482	0.710833	55.4731	193.345	0	3
4.46126	1.68415	1.08357	40.2443	182.619	0	3
4.61572	1.41485	0.910305	46.1943	163.338	0	3
6.47028	4.06848	2.61764	61.354	91.3487	0	3
4.66545	1.23636	0.79547	43.6091	175.488	0	3
4.87082	3.58815	2.30859	61.3875	81.6687	0	3
5.25564	1.81805	1.16972	50.5955	144.866	0	3
5.93333	5.86667	3.77458	62.4381	70.7077	0	3
4.28531	1.0452	0.672475	51.8983	206.35	0	3
4.36331	0.959233	0.617165	67.6954	121.996	0	3
4.59075	1.06762	0.686898	35.2829	185.008	0	3
4.80167	1.49223	0.960095	44.1577	162.396	0	3
5.23731	1.9561	1.25855	59.7435	108.2	0	3
5.46323	1.50968	0.971318	55.4529	135.709	0	3
5.47752	4.00122	2.57436	59.5043	97.5818	0	3
4.60994	1.21611	0.782442	41.9044	193.75	0	3
5.2	2.36783	1.52345	86.8993	73.0462	0	3
5.04623	1.63014	1.04882	38.1455	203.46	0	3
5.152	1.19867	0.771216	45.6187	168.924	0	3
4.91005	1.12698	0.725096	41.3439	154.691	0	3
8.30404	3.82074	2.45824	77.1687	81.7903	0	3
5.16558	2.08083	1.3388	53.3872	119.814	0	3
5.04057	2.64097	1.69919	39.0203	210.525	0	3
5.8527	2.35133	1.51283	60.4181	89.8713	0	3
5.35324	1.31058	0.84322	43.2901	139.548	0	3
5.33709	1.38928	0.893856	37.8561	197.493	0	3
5.19076	1.86948	1.20281	54.7871	109.787	0	3
5.88677	4.27513	2.7506	71.6233	64.9569	0	3
4.98113	1.3	0.836413	42.5755	175.946	0	3
6.32386	6.3733	4.10055	61.0124	77.0488	0	3
4.83814	1.54327	0.992931	47.5881	159.621	0	3
6.17661	1.43578	0.923773	44.9381	126.224	0	3
5.66888	1.71286	1.10205	43.068	147.523	0	3
6.04619	1.33583	0.859466	51.1461	134.155	0	3
5.09375	12.3831	7.96722	67.3183	44.3332	0	3
5.96364	4.51273	2.90346	51.7309	58.7994	0	3
4.85393	1.48315	0.954248	44.3118	190.07	0	3
6.45621	1.09776	0.706293	54.8554	99.2753	0	3
5.47845	9.77348	6.2882	53.7083	66.0721	0	3
6.02706	1.39237	0.895846	52.4563	166.199	0	3
6.14646	1.88157	1.21059	50.2004	118.001	0	3
4.99495	0.823232	0.529663	61.0808	142.458	0	3
[truncated: 3,745 more rows]
