# Supplementary material for: The pattern of nodal morphogen signaling is shaped by co-receptor expression
Source: eLife. 2021 May 26;10:e54894. doi: 10.7554/eLife.54894 (PMC8266389; doi:10.7554/eLife.54894)
Supplement: Figure 3—source data 2. — The quantified fluorescence intensities are organized in this table. Each row corresponds to an individual nucleus. The following characteristics were quantified: average GFP pixel intensity (‘GFP’), average pixel intensity for α-pSmad2 staining (‘pSmad2Raw’), α-pSmad2 staining intensity normalized to background (‘pSmad2 Normalized’), average DAPI pixel intensity (‘DAPI’), distance from the embryonic margin in μm (‘marginDist’), GFP staining status (‘GFP_Flag’, 0 denotes a cell host nucleus, one denotes a sensor cell nucleus), and embryo replicate number (‘Embryo Number’). We note that normalized α-pSmad2 staining was used to generate the figure panel. [file elife-54894-fig3-data2.xlsx]

## Sheet: Sheet1
GFP	pSmad2Raw	pSmad2Normalized	DAPI	marginDist	GFP_Flag	EmbryoNumber
45.1145	2.9759	3.62644	85.2369	70.72	1	1
59.6647	17.3761	21.1745	70.2886	69.2341	1	1
72.2957	20.4385	24.9064	85.304	62.6283	1	1
31.9266	11.0616	13.4797	68.3984	55.08	1	1
51.7214	50.7169	61.8037	104.005	59.0466	1	1
27.0074	4.06642	4.95535	55.4465	53.38	1	1
49.1854	33.725	41.0974	91.8682	33.32	1	1
48.2968	31.0489	37.8363	56.5599	29.92	1	1
30.4641	63.3403	77.1866	72.257	29.2894	1	1
68.3082	70.831	86.3148	66.8977	30.8577	1	1
66.7988	4.95768	6.04144	65.6771	91.8	1	1
68.223	10.9498	13.3435	72.3338	83.1166	1	1
55.9852	2.50234	3.04935	70.0039	74.8772	1	1
31.1127	58.3843	71.1472	72.0432	27.5568	1	1
43.5511	6.31569	7.69632	50.6588	72.42	1	1
43.0247	17.3759	21.1743	63.7353	70.4137	1	1
34.3143	3.21429	3.91693	57.1714	63.8422	1	1
38.014	15.9032	19.3797	76.6191	57.12	1	1
46.2443	5.19747	6.33365	55.0456	100.011	1	1
43.9201	5.12135	6.24089	60.5069	96.5744	1	1
35.5957	25.113	30.6027	62.786	59.8873	1	1
39.4499	73.5621	89.6429	61.284	38.2768	1	1
49.5257	64.8	78.9654	71.6286	23.2248	1	1
40.4963	52.8823	64.4425	69.9194	6.87607	1	1
31.5035	1.77113	2.1583	53.662	75.2699	1	1
27.8852	50.2307	61.2112	60.0091	46.5912	1	1
57.3749	60.8832	74.1924	76.7079	17.5026	1	1
25.3992	7.44643	9.07423	50.875	75.6192	1	1
41.1556	10.5138	12.8121	57.562	72.0808	1	1
40.6726	17.4066	21.2118	57.8504	78.4877	1	1
29.3727	8.69291	10.5932	59.1903	64.0501	1	1
38.1869	45.8892	55.9207	70.0441	43.4456	1	1
22.7946	12.5444	15.2866	66.7366	17.7322	1	1
52.4775	58.7765	71.6252	81.7974	13.94	1	1
31.2833	16.3381	19.9096	54.8735	76.6095	1	1
58.1885	68.8544	83.9061	65.1445	25.4819	1	1
51.4858	10.6629	12.9938	43.415	103.267	1	1
26.7014	9.62454	11.7285	49.2441	67.3475	1	1
26.3919	22.0917	26.921	56.4456	53.8844	1	1
35.8191	51.7603	63.0751	60.5121	42.0406	1	1
34.16	79.9513	97.4288	66.3221	26.8105	1	1
39.4408	11.9321	14.5405	50.5332	109.387	1	1
35.437	12.6408	15.4041	47.7637	80.5161	1	1
32.66	8.8194	10.7473	52.4415	75.9076	1	1
36.3909	7.56653	9.22059	59.8681	63.58	1	1
38.1175	25.0516	30.5279	66.3496	27.88	1	1
39.059	30.8433	37.5857	63.3071	13.6042	1	1
57.125	12.7923	15.5887	69.5596	96.4845	1	1
36.5865	16.5731	20.196	69.8077	87.5406	1	1
32.1538	9.88905	12.0508	57.9497	82.6277	1	1
25.625	15.0058	18.2861	49.7847	68.2791	1	1
45.4763	49.4441	60.2527	59.9144	36.9866	1	1
28.1952	32.6176	39.7478	66.0651	28.2834	1	1
28.0588	47.151	57.4583	61.1839	19.383	1	1
17.7603	4.35775	5.31037	51.522	121.844	1	1
57.4219	56.7648	69.1737	56.2656	64.471	1	1
37.3082	29.7953	36.3086	51.4061	73.8434	1	1
32.9979	36.2056	44.1202	52.5711	69.7796	1	1
26.9359	35.9753	43.8396	56.1541	52.9003	1	1
33.8986	26.1502	31.8667	55.0964	40.12	1	1
33.1707	59.5444	72.5609	57.361	50.7501	1	1
62.186	64.5006	78.6005	57.0981	33.5292	1	1
39.231	83.4254	101.662	69.3061	15.6437	1	1
39.2319	53.6034	65.3212	56.6614	58.976	1	1
50.6724	11.9212	14.5272	34.2389	129.211	1	1
38.0119	9.323	11.361	62.6687	120.981	1	1
51.2274	25.2775	30.8032	54.2751	87.9503	1	1
32.2751	26.4934	32.285	43.3479	64.8287	1	1
40.1658	8.28075	10.0909	49.9318	132.957	1	1
54.6058	37.3954	45.5701	51.0347	64.0374	1	1
39.4139	18.5763	22.6371	52.2613	54.107	1	1
51.108	27.1722	33.1121	54.617	48.696	1	1
46.5343	70.4856	85.8939	59.4418	45.48	1	1
29.1508	26.2698	32.0125	53.7963	31.8404	1	1
60.4119	23.9384	29.1713	63.3601	75.5565	1	1
66.0388	54.9652	66.9808	57.889	32.025	1	1
4.4297	1.10742	1.34951	48.9447	197.481	0	1
3.81646	0.591772	0.721135	50.1741	195.145	0	1
4.01138	0.652504	0.795142	62.2117	203.823	0	1
4.20698	0.693141	0.844663	49.3213	196.148	0	1
4.38642	1.17102	1.42701	49.4621	202.824	0	1
3.61945	0.404562	0.493	72.8451	188.757	0	1
3.8905	0.702093	0.855572	43.686	195.618	0	1
3.79802	0.885149	1.07864	49.0376	195.5	0	1
3.82945	0.533528	0.650158	60.2638	194.547	0	1
3.97744	0.598997	0.72994	48.5815	190.005	0	1
3.78194	0.599424	0.730459	49.6244	181.592	0	1
3.9862	0.60828	0.741252	49.0223	193.592	0	1
3.63276	0.474138	0.577785	44.5414	182.502	0	1
3.94767	0.579915	0.706686	77.1782	191.517	0	1
4.12851	0.730924	0.890705	51.257	181.832	0	1
4.17182	0.701031	0.854278	58.9966	176.508	0	1
3.79855	0.572464	0.697605	41.2768	182.621	0	1
3.80418	0.51711	0.630152	57.2414	169.946	0	1
4.01172	0.763672	0.930612	61.9355	171.966	0	1
4.09061	0.788026	0.96029	43.6489	170.594	0	1
4.24194	0.746544	0.90974	48.1912	176.46	0	1
4.21795	0.607843	0.740719	54.6735	174.265	0	1
3.94994	0.650834	0.793108	48.9114	172.346	0	1
4.40641	0.860256	1.04831	48.1846	172.048	0	1
4.3583	0.838951	1.02235	51.8377	162.833	0	1
4.87517	1.03704	1.26374	51.5171	169.735	0	1
4.02322	0.568823	0.693168	50.2952	158.078	0	1
4.10314	0.675635	0.82333	47.0777	151.126	0	1
4.70489	0.669173	0.815455	51.9868	159.831	0	1
3.85444	0.710335	0.865615	49.3741	144.032	0	1
4.63158	0.923002	1.12477	51.0429	156.472	0	1
4.40741	0.691358	0.84249	57.7672	143.258	0	1
4.14514	0.716981	0.873715	54.7126	147.009	0	1
4.62568	0.892274	1.08733	48.4418	152.3	0	1
3.9245	0.712251	0.86795	45.9772	138.427	0	1
4.12961	0.971549	1.18393	66.0495	134.987	0	1
4.52976	0.943452	1.14969	51.439	145.299	0	1
4.62883	1.02342	1.24715	55.8901	146.88	0	1
4.75567	1.2283	1.49681	50.3471	151.481	0	1
4.88136	0.754889	0.919909	81.3807	136.452	0	1
4.53722	0.501618	0.611273	72.0485	143.654	0	1
5.14025	1.68985	2.05926	65.9293	123.736	0	1
4.91476	0.862786	1.05139	50.9958	140.245	0	1
4.3872	0.626524	0.763484	97.372	127.233	0	1
4.39936	0.928629	1.13163	61.3761	124.152	0	1
5.10408	1.00922	1.22984	50.5033	137.628	0	1
4.39901	0.634449	0.77314	50.1809	132.961	0	1
4.42349	0.976868	1.19041	52.1459	127.392	0	1
4.60957	1.06549	1.29841	54.4219	135.212	0	1
4.03473	1.0841	1.32108	54.3912	121.766	0	1
4.65062	0.688446	0.838941	55.3528	134.836	0	1
5.25369	2.09975	2.55876	61.2722	111.222	0	1
4.6924	1.24291	1.51461	70.1839	113.748	0	1
5.08709	0.5521	0.67279	83.7683	125.933	0	1
4.71041	0.878745	1.07084	49.8417	124.44	0	1
4.71391	0.740397	0.90225	56.6358	122.583	0	1
3.95742	0.657967	0.8018	49.206	112.856	0	1
5.46323	0.883871	1.07709	61.0387	122.503	0	1
4.70236	0.792768	0.966068	55.6245	116.823	0	1
4.73041	0.548589	0.668512	74.8777	121.764	0	1
4.4403	1.19963	1.46187	67.3694	108.955	0	1
4.70669	1.2386	1.50936	60.9225	111.911	0	1
4.26541	1.95094	2.37742	72.4692	103.655	0	1
5.37062	1.5025	1.83095	58.4457	115.712	0	1
4.94314	0.622074	0.75806	67.9064	119.487	0	1
5.53519	3.30544	4.02802	61.8977	98.7254	0	1
4.49931	0.80055	0.975552	48.8446	112.881	0	1
5.20918	1.74764	2.12968	54.7139	104.468	0	1
4.9125	1.0875	1.32523	63.2625	100.783	0	1
5.12248	0.84926	1.03491	86.4266	97.8409	0	1
4.92434	0.962169	1.1725	54.1841	106.804	0	1
4.02125	1.28685	1.56816	54.8074	97.0192	0	1
5.64575	1.31799	1.60611	58.7127	112.022	0	1
4.73323	2.49085	3.03536	64.3765	98.992	0	1
5.46884	0.839763	1.02334	52.4985	106.298	0	1
5.25634	0.650704	0.792949	51.9268	104.607	0	1
4.72891	1.50806	1.83772	70.3981	93.6822	0	1
4.42771	1.88404	2.29589	65.8253	88.5672	0	1
4.9727	1.87258	2.28193	71.9602	92.8194	0	1
5.62674	2.33565	2.84623	58.0543	94.7289	0	1
4.51519	3.4521	4.20674	71.0526	84.1512	0	1
5.36256	2.26895	2.76494	68.9985	92.8007	0	1
4.3185	2.32266	2.8304	71.7272	79.5411	0	1
5.84043	3.41844	4.16572	69.9238	76.4335	0	1
5.22545	1.98667	2.42096	74.4788	88.4843	0	1
5.38223	1.59422	1.94272	59.5846	83.1729	0	1
5.43837	3.63278	4.42692	65.5108	72.9868	0	1
5.01451	2.08482	2.54057	77.8571	79.0981	0	1
4.73828	3.69727	4.5055	74.8223	71.2192	0	1
6.01072	7.3415	8.94637	60.389	67.0352	0	1
5.98779	1.75214	2.13516	60.9512	91.3898	0	1
4.70717	2.47871	3.02056	84.5047	69.9483	0	1
5.21168	3.02433	3.68546	77.8589	71.8825	0	1
5	3.23944	3.94758	72.7449	64.676	0	1
5.64286	0.682028	0.83112	100.191	75.6185	0	1
5.93231	0.750769	0.914889	116.754	74.3512	0	1
6.184	2.658	3.23904	136.448	52.992	0	1
4.70884	4.4739	5.4519	91.5803	63.9498	0	1
4.26104	10.4636	12.751	92.474	55.4294	0	1
6.18056	3.11574	3.79685	65.8634	78.817	0	1
6.15678	1.7161	2.09124	72.5106	74.0802	0	1
4.63243	4.52104	5.50935	91.427	51.412	0	1
4.75176	4.59507	5.59956	70.7641	54.9518	0	1
6.51969	8.74749	10.6597	79.3328	58.2602	0	1
6.0441	3.27108	3.98614	72.3048	73.4628	0	1
4.23085	7.84576	9.56085	84.5807	42.5544	0	1
6.99107	6.63839	8.08956	85.8051	66.6825	0	1
4.94583	4.34028	5.28907	78.0403	48.1433	0	1
6.8284	7.08784	8.63726	81.7099	51.5019	0	1
5.38714	7.70735	9.39219	88.2034	44.2914	0	1
7.33167	7.54364	9.1927	87.6571	56.3221	0	1
4.71166	11.3276	13.8038	102.623	37.1208	0	1
6.31371	2.861	3.48642	79.2519	46.7583	0	1
6.3141	2.94487	3.58863	107.305	55.2644	0	1
5.85653	6.40221	7.80174	98.9234	27.3779	0	1
6.39354	11.5846	14.1171	79.9983	45.6968	0	1
6.6263	18.1232	22.0849	74.1357	27.38	0	1
4.97992	8.59973	10.4797	72.8635	34.6733	0	1
7.03571	7.35938	8.96815	101.304	48.8134	0	1
4.56729	11.109	13.5375	81.6882	27.3399	0	1
4.9297	10.6946	13.0325	73.2718	28.6186	0	1
6.02736	21.8831	26.6668	73.2512	15.6732	0	1
6.18087	18.6239	22.6951	94.0747	40.9499	0	1
4.82671	18.0801	22.0325	70.7049	15.2053	0	1
5.07073	8.84756	10.7817	94.6183	27.5568	0	1
6.8283	20.9009	25.4698	86.1032	39.1133	0	1
6.40058	7.50432	9.14478	107.836	34.0832	0	1
4.85403	13.5153	16.4697	94.2407	13.1374	0	1
5.77846	21.4185	26.1006	79.1138	20.0023	0	1
5.31357	31.6944	38.6229	70.4048	22.9393	0	1
3.48712	0.538642	0.65639	62.171	192.115	0	1
3.59694	0.618622	0.753855	42.5918	185.14	0	1
3.94629	0.813299	0.991088	49.289	188.57	0	1
4.50596	2.56159	3.12156	57.7523	175.777	0	1
3.85126	0.486056	0.592309	38.8393	175.909	0	1
4.07246	0.778261	0.94839	45.6725	171.516	0	1
3.91917	0.503464	0.613522	69.1686	167.69	0	1
3.73443	0.454892	0.554332	38.3037	161.184	0	1
3.79781	0.677596	0.825719	46.3033	159.605	0	1
4.09683	0.585714	0.713753	43.4524	159.765	0	1
4.32845	0.745816	0.908853	43.7877	167.62	0	1
4.29028	0.797603	0.971961	54.4128	156.708	0	1
4.90723	1.32892	1.61942	51.2795	162.393	0	1
4.32619	0.660031	0.804315	43.6508	154.971	0	1
4.16048	0.548503	0.668407	55.0862	148.029	0	1
4.28867	0.845304	1.03009	42.7279	159.254	0	1
4.54234	0.629153	0.766687	67.4866	155.276	0	1
4.20631	0.57159	0.69654	43.1342	130.561	0	1
4.25703	0.613119	0.747148	45.0241	134.864	0	1
4.45399	0.944785	1.15132	48.7748	128.958	0	1
4.65011	0.650113	0.792229	48.7596	132.64	0	1
3.67598	0.953073	1.16142	50.1151	117.64	0	1
4.69477	0.752326	0.916785	54.0599	129.844	0	1
5.23517	2.52648	3.07878	53.9311	97.3736	0	1
5.51794	2.12332	2.58748	72.8857	104.628	0	1
4.53302	0.974057	1.18699	57.2512	92.6211	0	1
5.4782	1.25231	1.52607	60.4716	97.6605	0	1
4.41215	1.75439	2.13791	60.0652	80.5484	0	1
5.4967	2.12665	2.59154	67.0793	66.5463	0	1
5.4779	1.48304	1.80724	63.8613	77.7716	0	1
4.46961	1.87723	2.2876	60.1788	68.6404	0	1
4.78002	3.91411	4.76974	90.1963	59.7472	0	1
5.46134	1.83505	2.2362	117.165	49.3703	0	1
4.35832	3.09872	3.77611	61.085	54.2862	0	1
6.08089	3.22392	3.92867	71.8804	67.736	0	1
5.70136	4.42383	5.39089	68.3152	55.8967	0	1
5.13978	2.30511	2.80901	120.09	36.6901	0	1
5.39425	2.56345	3.12383	90.3689	34.695	0	1
5.75926	12.0582	14.6941	83.1429	42.6358	0	1
4.01716	9.37985	11.4303	71.8672	30.1969	0	1
6.08497	3.72658	4.54122	80.7527	42.652	0	1
5.88197	11.6609	14.21	67.9067	52.6835	0	1
5.78392	5.81838	7.09029	89.32	27.9793	0	1
4.44504	15.7193	19.1556	75.5304	24.0079	0	1
7.13431	4.67617	5.69839	88.0681	34.3316	0	1
5.40556	26.3681	32.1322	97.9208	18.6722	0	1
4.26862	18.6977	22.785	68.1631	14.8125	0	1
5.86081	12.3114	15.0026	72.5958	13.8735	0	1
5.53729	17.9052	21.8193	76.1694	14.9484	0	1
4.79787	13.7621	16.7705	64.2534	15.2697	0	1
5.22092	17.4207	21.2289	69.02	7.45678	0	1
7.11027	9.73565	11.8639	89.4773	9.15478	0	1
4.50146	25.261	30.783	92.7945	5.69944	0	1
5.62845	28.2312	34.4026	70.3135	13.2295	0	1
5.21579	32.3967	39.4787	63.2259	11.3021	0	1
3.08225	0.337662	0.411476	42.4372	193.632	0	1
3.5531	0.674779	0.822287	50.8009	195.205	0	1
3.7759	0.70296	0.856628	45.1205	179.649	0	1
4.30045	1.03812	1.26505	46.8969	193.539	0	1
3.98405	0.652313	0.794909	41.1435	181.368	0	1
3.90214	0.544268	0.663247	47.4529	169.273	0	1
4.14765	0.99217	1.20906	45.6555	173.499	0	1
3.96216	0.376216	0.458458	68.0616	153.167	0	1
4.15892	0.598919	0.729844	57.2108	144.492	0	1
4.41629	0.986425	1.20206	47.7376	150.31	0	1
4.23105	0.602888	0.734681	43.444	146.193	0	1
4.45564	0.692223	0.843545	52.6791	129.579	0	1
4.63804	0.809816	0.986843	53.5607	136.34	0	1
4.38889	0.611111	0.744701	51.0317	119.557	0	1
4.15666	0.872621	1.06338	48.0351	121.464	0	1
4.17816	0.725287	0.883837	49.092	106.817	0	1
4.3827	0.56406	0.687365	47.2213	120.112	0	1
4.81497	0.49932	0.608472	71.7211	112.671	0	1
5.69069	2.51084	3.05972	57.5453	93.9514	0	1
4.93349	0.707838	0.862573	63.4798	114.952	0	1
5.80268	0.936455	1.14117	52.0619	110.788	0	1
4.73737	1.18759	1.4472	56.6537	98.7254	0	1
5.0262	1.04476	1.27315	61.4967	97.0693	0	1
4.77096	0.77994	0.950437	86.1317	87.4441	0	1
4.52556	0.964213	1.17499	63.0706	86.935	0	1
6.65525	0.85277	1.03919	67.3455	91.5813	0	1
4.42316	2.60758	3.1776	71.7285	73.3368	0	1
4.63275	2.86434	3.49049	58.4351	70.2188	0	1
4.89906	2.34507	2.85771	69.1643	70.4137	0	1
4.61366	1.51731	1.84899	65.0739	68.4448	0	1
4.86581	2.71471	3.30815	74.9533	59.0818	0	1
5.30011	5.04929	6.15307	64.0164	59.4621	0	1
6.21794	5.49776	6.69958	76.0807	48.2009	0	1
4.70775	4.77891	5.82359	66.3215	41.1526	0	1
5.05023	17.3318	21.1206	81.0883	35.1584	0	1
4.8147	14.8851	18.139	64.6159	26.2153	0	1
4.10666	15.1251	18.4315	73.5172	18.5604	0	1
6.27755	15.6449	19.0649	74.7837	36.0224	0	1
4.19789	21.5094	26.2114	67.5445	8.52716	0	1
4.99208	11.4445	13.9463	77.3451	20.804	0	1
4.44242	29.406	35.8341	65.5825	2.28079	0	1
4.479	26.6104	32.4275	73.8491	3.04105	0	1
5.27036	9.45928	11.5271	97.7557	3.41696	0	1
4.49862	32.2719	39.3266	65.9945	1.7	0	1
4.35014	4.79884	5.84788	85.0713	1.83096	0	1
3.54309	0.372093	0.453433	61.6553	191.66	0	1
3.66367	0.440308	0.53656	63.6804	191.666	0	1
3.97497	0.457181	0.557121	54.4704	181.032	0	1
3.90506	0.735443	0.896212	44.919	177.932	0	1
3.79304	0.568696	0.693014	39.6574	180.999	0	1
4.27242	0.780931	0.951644	43.8241	180.282	0	1
4.05419	0.57266	0.697845	45.7611	172.31	0	1
4.26076	0.589176	0.717971	41.5633	161.328	0	1
4.53151	0.548319	0.668183	57.2836	155.185	0	1
5.68333	2.99643	3.65145	55.4798	146.802	0	1
4.32578	0.7002	0.853265	52.5849	141.752	0	1
4.09897	0.605042	0.737305	54.2213	133.018	0	1
4.24078	0.453917	0.553144	64.4159	145.075	0	1
4.50756	0.806045	0.982248	56.2406	137.702	0	1
4.0243	0.501458	0.611077	70.8785	113.649	0	1
4.57288	0.748023	0.911542	54.2825	115.958	0	1
4.84281	0.783724	0.955047	51.9699	116.549	0	1
3.89083	0.644105	0.784907	81.5415	102.435	0	1
4.24876	1.43905	1.75363	58.75	102.22	0	1
4.68587	0.86803	1.05778	60.6701	107.29	0	1
5.33113	2.17243	2.64733	53.0504	90.6985	0	1
4.83645	1.17134	1.4274	47.676	106.396	0	1
4.28713	1.42822	1.74043	59.9493	89.8848	0	1
4.48457	1.17486	1.43168	50.9554	83.0853	0	1
5.80663	1.31823	1.6064	63.1072	92.1425	0	1
5.12527	1.83407	2.235	56.0165	78.6959	0	1
5.46989	3.7172	4.52979	62.7022	59.6978	0	1
5.15789	2.9308	3.57148	61.9318	69.3883	0	1
5.71266	7.13165	8.69064	64.843	48.8867	0	1
4.77849	2.33333	2.8434	78.377	50.2108	0	1
4.46324	4.55042	5.54515	58.8824	45.1432	0	1
5.58145	3.59679	4.38305	66.6428	54.8413	0	1
5.03531	8.33371	10.1555	72.1617	31.206	0	1
5.59744	21.4114	26.092	67.9833	37.4201	0	1
4.62067	13.1842	16.0663	63.6649	14.6042	0	1
4.05708	22.2374	27.0986	65.3094	3.06	0	1
5.65455	23.5067	28.6453	72.1709	17.5026	0	1
4.37792	1.77013	2.15708	53.6156	191.504	0	1
3.44613	0.884674	1.07807	45.3445	187.355	0	1
3.89373	0.634146	0.772772	46.8502	179.726	0	1
4.05092	0.681263	0.830188	41.3024	185.959	0	1
3.53471	0.485929	0.592154	55.2326	169.783	0	1
3.86719	0.762277	0.928912	50.327	164.582	0	1
3.93861	1.05347	1.28375	42.3307	161.166	0	1
4.02433	0.510883	0.622564	42.799	152.516	0	1
4.32051	0.629487	0.767094	46.7692	134.548	0	1
4.6032	0.75436	0.919265	45.0363	145.587	0	1
4.37656	0.624573	0.761106	50.1741	137.227	0	1
4.18731	0.643505	0.784176	55.2759	122.892	0	1
4.42334	0.425629	0.518673	74.4233	126.497	0	1
4.22117	0.858887	1.04664	48.8141	111.022	0	1
4.35611	0.558476	0.68056	46.4087	110.362	0	1
4.6464	0.745495	0.908462	46.5203	111.009	0	1
4.87421	1.49894	1.82661	47.6226	116.024	0	1
4.44304	0.683544	0.832968	58.5158	98.8798	0	1
4.01587	0.930159	1.13349	54.4921	88.5372	0	1
4.82589	0.774554	0.943873	47.6083	100.926	0	1
5.12349	1.90562	2.3222	54.3343	80.6202	0	1
5.25619	1.05076	1.28045	69.7964	82.5724	0	1
4.65577	1.22707	1.49531	64.0681	76.8829	0	1
4.24879	2.48708	3.03076	68.664	69.1405	0	1
4.48599	2.44289	2.97691	60.222	64.8973	0	1
4.16686	2.219	2.70408	56.6095	58.9447	0	1
4.34938	4.0112	4.88805	64.9283	52.8238	0	1
5.68976	4.70341	5.73159	65.7863	44.2993	0	1
5.6617	3.43511	4.18603	66.1191	56.2225	0	1
5.42079	3.81937	4.6543	65.8496	61.866	0	1
4.67416	8.0192	9.77221	71.0993	35.0051	0	1
5.11133	2.87783	3.50693	72.9064	44.773	0	1
4.73221	9.7503	11.8817	67.6743	35.1304	0	1
5.20369	6.86756	8.36882	76.3755	37.5204	0	1
4.87937	13.4373	16.3747	76.1048	23.8121	0	1
7.059	1.14675	1.39743	73.7595	33.8671	0	1
7.13454	1.95382	2.38092	102.635	30.968	0	1
3.94488	0.922244	1.12385	43.9705	203.797	0	1
4.07963	0.742593	0.904925	46.2778	198.188	0	1
3.8844	0.620183	0.755757	50.3138	186.014	0	1
3.93076	0.573269	0.698587	44.8084	167.078	0	1
3.91235	0.458025	0.55815	64.384	162.388	0	1
3.95562	0.798817	0.973439	42.5621	164.9	0	1
4.2242	0.518471	0.63181	45.8854	150.697	0	1
3.97832	0.610745	0.744255	54.4929	143.164	0	1
4.64016	0.925684	1.12804	49.0443	145.18	0	1
4.10182	0.52	0.633673	72.6509	125.924	0	1
4.69278	0.674387	0.821809	52.4612	127.511	0	1
4.30871	0.378788	0.461592	66.6648	116.899	0	1
4.51068	0.571174	0.696034	47.6299	123.467	0	1
5.17344	2.08722	2.54348	53.0406	97.2495	0	1
4.46908	1.19137	1.4518	57.6266	98.6844	0	1
4.25	0.880282	1.07271	53.3791	98.2088	0	1
5.16111	0.848611	1.03412	50.4292	103.823	0	1
4.8612	0.774974	0.944384	63.6309	92.4406	0	1
4.08438	1.31864	1.6069	52.9118	79.9521	0	1
4.62439	1.05	1.27953	54.0171	69.2699	0	1
4.00915	5.55386	6.76795	61.0102	40.133	0	1
4.63484	9.52854	11.6115	76.9675	40.2753	0	1
5.75397	2.05873	2.50877	76.5206	37.7691	0	1
9.83033	1.35435	1.65042	118.201	42.4279	0	1
3.96134	3.53103	4.30292	113.351	25.6717	0	1
8.47222	3.81687	4.65125	91.0967	31.9274	0	1
4.56156	19.776	24.0991	66.5449	10.5619	0	1
5.36707	20.1967	24.6118	68.191	9.4835	0	1
5.69433	22.4357	27.3402	76.2061	3.4	0	1
3.69231	0.483806	0.589567	50.7561	189.892	0	1
3.79701	0.70597	0.860297	42.5567	180.717	0	1
3.84162	0.616681	0.751488	74.1331	182.612	0	1
4.0023	0.462069	0.563078	56.6517	179.541	0	1
4.17745	0.650313	0.792473	50.2777	173.278	0	1
5.34615	2.08741	2.54373	54.9948	155.244	0	1
4.23141	0.714136	0.870248	43.577	164.434	0	1
4.52809	0.678652	0.827006	51.6899	157.831	0	1
4.45048	0.930777	1.13425	47.1427	161.05	0	1
4.33333	0.681957	0.831034	50.5576	146.497	0	1
4.60515	0.77897	0.949254	49.9206	150.025	0	1
3.31579	0.373684	0.455372	64.9474	134.661	0	1
4.38847	0.568837	0.693186	58.9552	131.092	0	1
5.02995	0.760417	0.926645	50.6224	143.389	0	1
4.3027	0.547453	0.667127	49.2138	120.344	0	1
4.17632	0.70954	0.864647	60.3305	106.446	0	1
4.45927	0.946629	1.15356	50.566	90.8367	0	1
4.6272	0.945844	1.15261	59.8338	82.468	0	1
4.93145	1.83569	2.23697	64.8206	54.8792	0	1
4.83333	4.37179	5.32748	65.4712	46.809	0	1
5.3358	3.06543	3.73554	95.1642	33.9949	0	1
6.11364	3.65152	4.44974	76.6951	41.1611	0	1
4.3761	16.7873	20.457	66.545	10.6762	0	1
5.0481	16.1217	19.646	64.9628	13.8735	0	1
6.68072	6.60542	8.04938	81.9142	30.9699	0	1
5.35376	16.9098	20.6063	65.674	2.90496	0	1
3.96022	0.888172	1.08233	44.2667	199.58	0	1
4.09267	1.10792	1.35011	56.7056	181.733	0	1
3.68533	0.830116	1.01158	50.3678	175.698	0	1
4.05958	0.537239	0.654681	45.006	185.169	0	1
3.9961	0.516569	0.629492	52.73	165.744	0	1
4.17562	0.635347	0.774235	44.6689	168.262	0	1
5.12919	2.92547	3.56498	56.2571	154.712	0	1
5.56602	1.96893	2.39934	59.7777	150.993	0	1
4.23031	0.739173	0.900758	50.0965	152.763	0	1
4.40619	0.991753	1.20855	45.5742	158.261	0	1
4.09503	0.518359	0.631673	52.5518	144.883	0	1
4.12933	0.617333	0.752284	45.9093	134.266	0	1
3.89558	0.411647	0.501633	70.1787	127.451	0	1
4.36917	0.640736	0.780802	46.2984	129.358	0	1
4.63303	0.656619	0.800157	47.9581	131.948	0	1
4.40451	0.924893	1.12708	50.2586	109.556	0	1
4.9918	0.971311	1.18364	59.9324	109.689	0	1
4.68546	0.754698	0.919677	63.4075	104.809	0	1
10.4387	0.531335	0.647486	80.8147	95.2219	0	1
4.84026	4.1987	5.11655	46.4338	71.7907	0	1
4.23077	1.66667	2.031	57.5536	73.0177	0	1
4.58207	1.81857	2.21612	69.0389	72.814	0	1
5.96016	5.16932	6.29935	65.503	60.7459	0	1
3.96502	3.12243	3.805	52.3261	60.686	0	1
5.64525	1.64252	2.00157	63.4409	71.7626	0	1
5.10431	1.59977	1.94949	55.0011	67.96	0	1
4.77763	2.42133	2.95063	59.277	60.0916	0	1
4.98905	2.91788	3.55574	57.3896	58.0992	0	1
5.32564	2.10207	2.56158	71.6112	62.0377	0	1
5.05242	6.4095	7.81062	63.9021	45.3617	0	1
4.58282	8.36372	10.192	67.6275	35.4938	0	1
4.94172	36.0794	43.9664	72.0566	4.77213	0	1
5.25989	41.5487	50.6313	62.816	11.58	0	1
3.8407	0.657296	0.800982	38.6118	188.679	0	1
3.96609	0.666361	0.812029	45.3089	185.741	0	1
4.26091	0.779886	0.950371	46.1983	171.034	0	1
3.84633	0.431638	0.525995	53.5153	174.261	0	1
3.86059	0.731656	0.891598	57.9811	149.614	0	1
4.16915	0.585821	0.713882	49.5149	163.54	0	1
4.22624	0.561086	0.68374	61.0724	162.446	0	1
3.85023	0.51014	0.621658	51.0842	142.597	0	1
4.35698	0.492239	0.599844	61.0022	150.28	0	1
5.05239	0.829157	1.01041	50.68	137.782	0	1
4.88272	1.10593	1.34768	53.1463	133.6	0	1
4.63072	1.06056	1.2924	53.6883	123.491	0	1
4.93481	0.896679	1.09269	57.0787	124.444	0	1
4.67636	0.674419	0.821848	64.7248	119.096	0	1
4.31111	0.474074	0.577708	67.0185	115.778	0	1
3.99726	0.431507	0.525835	47.6288	105.475	0	1
4.65077	1.38379	1.68629	55.975	104.087	0	1
4.19938	1.09969	1.34008	51.4019	98.22	0	1
3.9901	1.19208	1.45267	69.6792	92.7309	0	1
4.60031	1.87749	2.28791	54.7458	83.7091	0	1
4.57762	1.18773	1.44736	52.0409	75.9487	0	1
4.60788	3.09261	3.76866	69.867	58.5452	0	1
5.48199	1.23842	1.50914	66.7033	57.9598	0	1
4.30841	6.97404	8.49858	59.3801	46.6804	0	1
5.47549	3.26272	3.97596	70.4487	54.5528	0	1
5.86588	7.30566	8.90269	68.0693	48.8134	0	1
4.50523	12.5309	15.2702	61.2255	26.4786	0	1
4.60832	8.23312	10.0329	66.8878	28.1215	0	1
5.85246	14.3374	17.4716	67.8347	32.6276	0	1
5.38286	6.07238	7.39982	91.7686	22.1731	0	1
6.06923	14.641	17.8416	67.6859	13.6763	0	1
6.31286	7.40332	9.0217	92.7917	7.64055	0	1
3.97881	0.878531	1.07058	36.9972	209.41	0	1
3.78219	0.636986	0.776233	45.2986	192.256	0	1
4.00336	1.16573	1.42057	46.0045	196.86	0	1
3.83096	1.18432	1.44321	44.8055	183.035	0	1
4.03057	0.640466	0.780473	39.5473	190.735	0	1
3.75651	0.460922	0.56168	52.7565	184.242	0	1
4.05005	0.71972	0.877052	50.2753	165.287	0	1
4.16899	0.568588	0.692883	52.9553	146.74	0	1
4.36111	0.829861	1.01127	42.3866	155.112	0	1
3.98361	0.648907	0.790759	47.6694	128.872	0	1
4.05289	0.770459	0.938883	56.8932	121.827	0	1
3.67989	0.338624	0.412648	83.7103	119.789	0	1
5.50567	2.5586	3.11792	67.7183	122.325	0	1
4.68206	1.58428	1.93061	58.907	116.823	0	1
4.21847	0.488739	0.595578	85.7016	95.2486	0	1
4.82563	1.6288	1.98486	59.7728	94.5842	0	1
4.84848	1.99091	2.42613	59.853	96.397	0	1
4.94131	1.61905	1.97297	62.1539	83.6462	0	1
4.43579	4.47684	5.45549	55.2242	52.677	0	1
5.25971	2.4672	3.00654	62.6064	36.1888	0	1
4.292	5.15215	6.27843	51.4019	40.1632	0	1
5.81093	3.04431	3.70981	70.0473	50.3579	0	1
4.46233	21.3323	25.9956	59.5697	24.5413	0	1
4.53884	20.0058	24.3791	67.4165	16.8806	0	1
6.00562	7.91573	9.64612	76.0787	17.7387	0	1
3.86752	0.742675	0.905025	44.0484	190.05	0	1
4.16412	0.812977	0.990695	54.1247	196.44	0	1
3.9211	0.759506	0.925535	43.212	186.66	0	1
4.14706	1.11529	1.3591	56.1941	177.025	0	1
3.76791	0.653295	0.796107	51.7689	167.988	0	1
3.98643	0.612735	0.74668	54.1775	167.803	0	1
4.34371	3.38802	4.12865	77.9341	152.08	0	1
4.39126	0.834973	1.0175	54.1279	161.544	0	1
3.74904	0.375479	0.457559	47.8008	167.272	0	1
4.09195	0.604775	0.736979	48.4615	150.966	0	1
3.78803	0.582924	0.710353	62.8224	141.46	0	1
4.39829	0.499145	0.608259	52.7915	152.576	0	1
4.15942	0.606625	0.739235	52.2391	135.504	0	1
4.14109	0.429933	0.523918	62.2031	135.723	0	1
4.80716	1.44215	1.75741	56.5262	124.714	0	1
4.05521	1.36196	1.65969	58.1258	112.942	0	1
4.97183	1.09577	1.33531	55.3423	121.441	0	1
5.81898	4.92263	5.99872	52.5708	103.524	0	1
4.65253	1.0202	1.24322	65.2556	103.016	0	1
6.14589	3.05382	3.7214	60.9023	90.2538	0	1
4.59056	0.982143	1.19684	49.0944	86.951	0	1
4.49108	2.24601	2.73699	59.5286	71.3482	0	1
7.89336	0.944056	1.15043	69.5734	80.0222	0	1
5.05374	1.32159	1.61049	58.9815	80.557	0	1
4.74603	1.08598	1.32338	52.7011	72.4064	0	1
4.48496	1.27257	1.55075	69.554	65.6869	0	1
5.359	5.13528	6.25786	95.0791	37.1286	0	1
3.91733	8.31031	10.127	59.5153	38.0132	0	1
4.78481	4.12278	5.02403	56.6962	45.5359	0	1
3.81118	17.6077	21.4568	55.2603	23.8727	0	1
4.39213	26.7545	32.603	57.8021	17.4827	0	1
3.71985	0.651206	0.793561	53.7607	193.51	0	1
3.69745	0.929936	1.13322	42.689	192.202	0	1
4.07928	0.590991	0.720183	49.591	156.99	0	1
4.85631	1.02071	1.24384	47.0595	159.156	0	1
4.32262	1.11429	1.35787	47.256	149.297	0	1
4.30769	1.13248	1.38004	45.5769	142.815	0	1
4.29135	1.28039	1.56029	43.264	143.817	0	1
4.7373	1.32407	1.61351	48.4362	139.74	0	1
4.60987	0.907067	1.10535	42.1249	143.762	0	1
4.02536	0.81458	0.992649	56.683	123.157	0	1
4.69113	1.17636	1.43351	58.3928	118.571	0	1
4.80083	1.21569	1.48144	56.8163	117.556	0	1
4.05281	0.664395	0.809633	61.523	109.026	0	1
5.01661	2.00356	2.44154	62.5148	112.046	0	1
5.27254	1.62786	1.98371	60.0882	108.355	0	1
5.32692	3.70604	4.51619	57.6575	81.1682	0	1
4.43853	1.51404	1.84501	60.728	84.6163	0	1
4.33827	2.74815	3.3489	53.9148	72.4144	0	1
4.29877	1.88225	2.29371	78.5114	61.3735	0	1
4.31579	1.68031	2.04763	83.499	58.3266	0	1
5.38194	6.02746	7.34507	68.3203	57.7249	0	1
4.53957	6.75629	8.23323	57.4128	47.8096	0	1
4.73395	11.8949	14.4951	64.5265	37.6157	0	1
4.14882	13.292	16.1977	56.3754	30.8727	0	1
4.13891	32.5916	39.7162	65.7155	10.7356	0	1
5.50767	14.8326	18.0751	66.7155	31.0221	0	1
4.11586	0.666667	0.812401	45.9924	201.845	0	1
3.64934	1.02268	1.24625	46.9943	184.265	0	1
4.13138	1.47866	1.8019	47.5582	188.764	0	1
3.80642	0.942246	1.14822	45.5134	194.82	0	1
4.39332	1.89796	2.31286	62.8562	169.6	0	1
4.2883	0.969359	1.18126	39.1267	172.265	0	1
4.03612	0.444992	0.542268	68.5961	171.629	0	1
4.36072	0.985836	1.20134	47.0727	161.195	0	1
4.42911	0.573418	0.698768	69.5709	151.402	0	1
3.96535	0.762271	0.928905	55.0173	135.361	0	1
4.60936	1.44824	1.76483	52.6832	134.493	0	1
4.59198	0.732311	0.892396	82.158	137.446	0	1
4.61777	2.63257	3.20806	66.2207	90.3537	0	1
4.75813	0.816124	0.994531	75.3777	92.2378	0	1
4.58726	3.0625	3.73197	51.8986	79.552	0	1
7.16216	2.53006	3.08314	77.1594	74.2299	0	1
5.12688	2.19975	2.68062	83.3631	68.6169	0	1
4.14154	7.21538	8.79268	64.1826	54.8255	0	1
5.54595	4.13129	5.0344	100.943	37.3226	0	1
6.03064	2.65738	3.23829	82.6713	30.9699	0	1
3.361	12.3859	15.0935	66.2324	9.07233	0	1
3.65607	12.3006	14.9895	65.474	7.88624	0	1
5.53846	3.52885	4.30026	68.6707	26.1292	0	1
3.83885	43.6106	53.144	64.1516	2.40416	0	1
5.4822	26.9757	32.8727	68.6626	14.6792	0	1
5.81853	3.31726	4.04242	69.7614	14.1499	0	1
3.71761	0.92691	1.12953	45.0587	202.001	0	1
3.87913	1.34917	1.64411	44.0413	201.028	0	1
3.93756	2.17298	2.648	42.4585	180.568	0	1
4.00725	1.21658	1.48253	60.0746	182.702	0	1
3.67141	0.575679	0.701524	70.1268	172.392	0	1
4.09845	0.855134	1.04207	47.1364	166.735	0	1
3.78424	0.675422	0.823071	45.7636	155.224	0	1
4.70947	1.05876	1.29021	51.2187	160.695	0	1
4.66944	1.18191	1.44028	51.8035	156.413	0	1
4.41659	0.770971	0.939507	52.8049	132.957	0	1
4.49121	1.56429	1.90625	54.0759	130.858	0	1
4.58323	1.29036	1.57244	43.826	131.353	0	1
3.8963	0.632407	0.770653	74.3444	117.034	0	1
5.07713	0.732305	0.892388	112.366	121.469	0	1
4.70311	1.55581	1.89591	53.9655	106.29	0	1
3.97106	1.23794	1.50856	63.4228	99.3341	0	1
5.15109	1.7757	2.16387	55.6269	106.888	0	1
4.48862	0.684724	0.834406	89.1094	100.886	0	1
4.12862	1.87889	2.28961	41.3365	94.3517	0	1
4.10546	3.74566	4.56447	55.7283	81.2664	0	1
5.21755	13.6683	16.6562	58.2007	76.2601	0	1
11.8815	1.31517	1.60266	83.2559	89.7626	0	1
4.25844	2.83017	3.44885	47.1382	79.8276	0	1
4.84114	1.21906	1.48555	70.9732	81.1461	0	1
4.21879	3.44499	4.19808	53.5488	68.5486	0	1
4.35377	1.2783	1.55774	73.2028	68.3747	0	1
4.31713	4.97448	6.06192	53.2418	56.8461	0	1
4.76575	1.76575	2.15174	77.4724	57.5444	0	1
4.97818	1.67818	2.04504	74.7818	57.5173	0	1
6.86517	3.41348	4.15968	81.5955	61.2	0	1
4.90856	8.56894	10.4421	60.7213	41.0049	0	1
4.55232	11.4113	13.9058	63.556	30.1816	0	1
4.33333	19.7477	24.0646	53.2286	19.676	0	1
6.80116	23.6749	28.8503	71.2366	22.9393	0	1
6.07624	23.5301	28.6739	80.0691	15.2053	0	1
3.44099	1.10714	1.34917	44.0342	193.594	0	1
4.20197	0.874454	1.06561	52.8417	187	0	1
3.77827	1.38339	1.6858	45.7818	173.828	0	1
4.46779	1.36555	1.66406	48.6401	173.194	0	1
3.98787	1.00433	1.22388	53.4827	145.186	0	1
5.11111	0.861789	1.05018	51.374	131.362	0	1
5.92085	1.80653	2.20144	57.4246	111.222	0	1
4.07955	1.5211	1.85362	53.2719	91.6141	0	1
4.08984	3.14332	3.83045	62.7914	85.4645	0	1
4.02206	3.54202	4.31631	46.1933	72.4	0	1
4.62523	1.22523	1.49306	72.1982	77.932	0	1
4.24611	4.18105	5.09503	56.9646	59.4835	0	1
4.56187	1.57191	1.91553	73.6087	60.5486	0	1
3.87003	2.40602	2.93197	90.7358	53.101	0	1
3.87396	6.95737	8.47826	54.3095	45.5917	0	1
4.78907	6.27011	7.64076	58.8012	49.2096	0	1
5.05899	9.52949	11.6127	58.441	47.1755	0	1
4.1525	9.6775	11.793	55.7388	34.0442	0	1
5.30573	17.172	20.9258	57.9274	28.6892	0	1
4.74099	18.0574	22.0048	56.6636	29.8039	0	1
5.20259	22.0963	26.9266	68.7557	8.16	0	1
4.37492	5.46317	6.65743	78.1526	2.47524	0	1
3.59259	1.19319	1.45403	58.0701	162.779	0	1
4.08685	1.05335	1.28361	52.7655	157.235	0	1
5.12548	1.32819	1.61853	63.7568	95.3226	0	1
4.48983	0.79661	0.970751	59.9898	92.6305	0	1
9.51566	0.772443	0.9413	88.1587	71.4397	0	1
5.58701	1.15974	1.41326	95.3351	60.029	0	1
4.45952	9.06429	11.0458	50.8774	41.2088	0	1
4.16477	14.0368	17.1053	61.1069	24.4138	0	1
4.68421	2.06852	2.5207	98.0844	135.861	0	1
4.3727	1.52837	1.86248	75.1626	105.087	0	1
4.50635	1.64428	2.00373	71.6388	101.209	0	1
3.89258	1.78184	2.17135	72.66	174.083	0	1
4.02005	1.95077	2.37722	88.4184	85.6166	0	1
4.01995	3.06608	3.73634	63.0711	65.8135	0	1
4.91607	3.55619	4.33358	57.9061	38.5687	0	1
3.53145	2.34056	2.85222	65.0087	52.9462	0	1
4.53473	3.44954	4.20362	63.0183	30.0838	0	1
7.21823	3.32374	4.05032	90.1103	53.72	0	1
40.2773	0.947266	1.19306	28.3398	205.559	1	2
24.2198	2.47312	3.11483	39.601	144.27	1	2
39.6994	1.96785	2.47845	43.7556	132.082	1	2
41.1918	5.87276	7.39659	62.6792	54.6174	1	2
48.4032	14.1628	17.8376	47.8545	54.0525	1	2
43.9268	13.1529	16.5657	48.6322	49.192	1	2
16.2848	8.63124	10.8708	47.5842	55.76	1	2
48.4316	12.6452	15.9263	72.3926	42.7049	1	2
56.692	16.924	21.3154	54.3715	36.1649	1	2
38.6464	0.963018	1.2129	30	202.623	1	2
43.0475	25.3251	31.8963	47.23	48.2381	1	2
100.605	57.1025	71.9192	60.888	25.7728	1	2
43.0671	21.8924	27.5729	54.2523	41.2088	1	2
42.049	19.4832	24.5385	65.7423	41.7148	1	2
23.0937	1.17674	1.48207	36.9789	168.917	1	2
28.7654	1.1261	1.41829	30.3021	163.06	1	2
35.817	2.0289	2.55535	32.2697	162.158	1	2
36.5142	5.05496	6.3666	31.3706	106.594	1	2
41.6196	2.1649	2.72664	57.3663	80.92	1	2
18.2883	8.66192	10.9095	49.1708	32.0286	1	2
23.3422	1.17556	1.48058	27.7467	193.741	1	2
34.9556	0.922222	1.16152	27.9148	157.214	1	2
31.9778	0.816456	1.0283	26.9589	156.082	1	2
27.6307	1.30456	1.64306	26.3765	136.764	1	2
34.364	8.76023	11.0333	41.6901	72.7608	1	2
28.7753	11.7603	14.8117	41.68	53.9498	1	2
24.2517	18.5927	23.4171	44.3529	49.3	1	2
42.0803	34.7725	43.795	48.6998	34.7682	1	2
31.1072	35.3986	44.5837	52.5937	35.7	1	2
38.8363	49.3488	62.1535	39.7562	23.5485	1	2
63.1347	51.6074	64.9981	59.8221	16.447	1	2
109.459	54.6817	68.8702	54.5295	6.77445	1	2
33.3153	1.03153	1.29919	24.6239	161.658	1	2
30.6403	1.33219	1.67785	25.7745	153.748	1	2
126.484	70.5562	88.8637	61.1486	16.2098	1	2
130.986	60.8975	76.6988	59.6132	15.334	1	2
30.7018	8.70185	10.9598	30.1847	175.44	1	2
28.3258	0.909677	1.14572	27.9	155.964	1	2
28.8742	1.54452	1.94528	37.0854	159.724	1	2
34.1927	1.31707	1.65882	30.6366	117.516	1	2
33.1868	23.9733	30.1938	47.9279	59.7482	1	2
59.1644	49.9956	62.9682	56.3002	48.0604	1	2
111.56	64.66	81.4376	72.8465	14.6555	1	2
26.6639	1.01325	1.27616	25.7103	176.85	1	2
32.238	1.58597	1.99749	28.4099	124.539	1	2
45.6449	25.3595	31.9397	48.3604	59.16	1	2
41.6552	26.9357	33.9248	43.3886	51.34	1	2
30.7433	2.0755	2.61404	25.5336	191.855	1	2
41.4302	17.0825	21.515	45.6037	195.803	1	2
36.2189	2.31654	2.91762	29.0693	159.637	1	2
23.0509	0.797963	1.00501	24.7029	140.952	1	2
30.5956	4.83211	6.08592	24.8664	131.295	1	2
38.1018	17.1462	21.5952	42.752	50.66	1	2
20.3233	52.4691	66.0835	51.6751	39.349	1	2
24.5252	16.1472	20.337	47.9951	19.6201	1	2
24.7761	2.46133	3.09998	34.3297	167.96	1	2
25.4356	14.33	18.0482	43.3589	71.6505	1	2
39.5532	20.8909	26.3116	40.297	62.4287	1	2
37.6004	1.56827	1.9752	30.6345	208.42	1	2
26.5081	1.1461	1.44349	27.8247	159.06	1	2
30.5543	10.4058	13.1058	26.3703	151.98	1	2
43.6624	10.9523	13.7941	32.0349	93.9016	1	2
59.0379	59.875	75.411	36.8064	42.9061	1	2
38.7426	70.3459	88.5989	43.5089	39.78	1	2
35.2372	9.80673	12.3513	32.3001	107.823	1	2
45.0667	13.9797	17.6071	30.9401	106.899	1	2
37.1443	38.0941	47.9785	40.9085	64.625	1	2
48.6533	18.7457	23.6098	35.2433	60.1185	1	2
30.506	9.37649	11.8095	45.7251	58.14	1	2
35.6181	69.3892	87.3939	53.7551	41.1175	1	2
46.3731	73.5701	92.6597	41.8937	38.0937	1	2
31.4609	67.5831	85.1191	50.4088	32.2068	1	2
28.8852	59.6074	75.074	49.3963	30.9176	1	2
34.0222	25.0141	31.5046	37.2717	86.0744	1	2
52.4383	28.7965	36.2684	41.0638	45.9013	1	2
4.26748	0.977914	1.23166	32.7902	211.471	0	2
4.0094	0.821477	1.03463	36.651	191.304	0	2
4.08777	0.805643	1.01469	39.1317	212.984	0	2
4.23594	0.887517	1.1178	41.9465	213.958	0	2
4.0643	0.884701	1.11426	31.1619	209.1	0	2
4.26691	0.904418	1.13909	33.4599	200.892	0	2
4.27797	0.746503	0.940202	33.4353	206.754	0	2
4.22128	0.649645	0.818212	35.8383	205.173	0	2
4.16103	1.28341	1.61643	40.7327	192.36	0	2
3.98952	1.0524	1.32546	32.6347	169.485	0	2
4.23077	1.10931	1.39715	38.0891	176.114	0	2
4.17188	1.23307	1.55302	39.1693	178.176	0	2
4.29612	0.757282	0.953777	38.6311	200.954	0	2
4.11277	0.891489	1.12281	35.7255	197.575	0	2
4.54068	0.716535	0.902458	36.7087	200.933	0	2
4.43377	0.965066	1.21548	40.2111	200.235	0	2
4.35842	1.53943	1.93887	41.0448	179.862	0	2
4.06314	0.866373	1.09117	40.5918	198.244	0	2
3.86275	0.766214	0.965027	38.5747	197.337	0	2
4.09217	1.23041	1.54968	35.8756	161.752	0	2
4.18112	0.942197	1.18667	34.1908	182.863	0	2
4.56823	0.745418	0.938834	40.8391	195.16	0	2
3.90149	1.08507	1.36662	34.2224	164.071	0	2
4.09873	0.738854	0.930567	38.5191	192.381	0	2
4.29032	0.806452	1.0157	33.1398	193.46	0	2
4.21766	0.901065	1.13487	40.7702	187.643	0	2
3.94292	0.38055	0.479292	38.3467	190.507	0	2
4.22438	0.764543	0.962922	43.1039	192.867	0	2
3.94142	0.945607	1.19097	39.2657	168.755	0	2
4.62607	0.816619	1.02851	44.2521	189.721	0	2
4.43441	0.987097	1.24322	40.0215	189.424	0	2
3.9164	1.46785	1.84871	32.4116	153.298	0	2
4.4933	0.71875	0.905247	36.5424	185.985	0	2
4.15195	0.574949	0.724133	54.9959	181.428	0	2
4.20569	0.730853	0.920491	33.6039	183.94	0	2
4.24464	0.955357	1.20325	42.7732	172.805	0	2
4.08827	1.41227	1.77872	38.3315	156.975	0	2
4.37854	1.45749	1.83567	40.4433	146.035	0	2
3.98695	0.644909	0.812246	48.8277	164.522	0	2
4.47895	0.826316	1.04072	41.7193	181.526	0	2
4.03708	0.919654	1.15828	36.7491	151.282	0	2
4.32677	0.791339	0.996671	35.4409	177.114	0	2
4.3845	1.39912	1.76216	59.1374	177.474	0	2
4.10608	1.00707	1.26838	35.8317	140.788	0	2
4.53346	0.942639	1.18723	45.9407	173.355	0	2
4.43946	0.775785	0.977081	40.3543	171.7	0	2
4.76287	0.954758	1.20249	41.1342	171.7	0	2
4.25997	0.777166	0.978821	40.4897	159.231	0	2
4.58785	1.07375	1.35236	45.5184	170.266	0	2
4.12308	1.02098	1.2859	41.8587	151.64	0	2
4.40448	0.731415	0.921198	38.3885	169.89	0	2
4.43993	1.09983	1.38521	41.1692	133.696	0	2
4.11214	0.635177	0.799989	51.4378	168.751	0	2
4.46543	1.06745	1.34443	51.5818	163.209	0	2
4.71264	0.714286	0.899624	46.1691	160.992	0	2
3.90196	0.780392	0.982884	46.9255	124.007	0	2
4.48039	0.911765	1.14834	41.8162	158.44	0	2
4.04484	0.693572	0.873537	34.5247	157.76	0	2
4.21154	0.754808	0.950661	51.6442	159.405	0	2
4.29456	0.838649	1.05626	37.8443	146.928	0	2
4.42176	1	1.25947	38.4009	138.72	0	2
4.26176	1.09706	1.38172	32.8059	127.629	0	2
4.40144	0.792067	0.997588	46.2692	154.185	0	2
4	0.788235	0.992762	54.6196	117.009	0	2
4.83095	0.778571	0.980591	54.0071	152.618	0	2
4.48712	0.737705	0.92912	41.2389	151.98	0	2
4.25841	0.991587	1.24888	42.0685	151.763	0	2
4.3534	0.819417	1.03204	41.6058	129.093	0	2
3.93566	0.469169	0.590906	46.2587	123.8	0	2
4.61646	0.970711	1.22259	44.1478	149.269	0	2
4.42682	0.987747	1.24404	40.1593	140.629	0	2
4.3798	0.924552	1.16445	51.9258	142.246	0	2
4.44527	0.933432	1.17563	39.9127	144.872	0	2
4.19002	0.678147	0.854109	55.5891	145.295	0	2
4.73356	0.976391	1.22974	50.457	142.256	0	2
4.52295	0.864271	1.08853	40.1657	144.25	0	2
4.16893	0.750782	0.945591	35.8436	143.15	0	2
4.69497	1.03813	1.3075	45.0364	142.8	0	2
4.34382	1.3618	1.71515	38.0404	112.657	0	2
4.46452	1.14409	1.44095	37.0968	113.794	0	2
4.51302	1.28646	1.62026	50.9531	138.78	0	2
4.72342	1.34054	1.68838	55.7883	130.741	0	2
4.49074	0.598148	0.753352	70.6833	133.623	0	2
4.58614	0.949438	1.19579	47.6723	135.212	0	2
4.3337	0.761958	0.959666	37.7898	133.731	0	2
4.48936	0.996454	1.25501	45.2364	135.169	0	2
4.51307	0.829248	1.04442	40.4984	134.548	0	2
4.31974	2.04237	2.57231	39.6195	98.819	0	2
4.42771	0.762048	0.95978	46.0181	130.024	0	2
4.73964	0.910256	1.14644	53.3491	130.647	0	2
4.17241	1.26897	1.59823	37.3276	102.418	0	2
4.23197	0.880878	1.10944	59.8072	126.316	0	2
4.86574	1.27315	1.6035	51.6377	131.326	0	2
4.48126	0.824588	1.03855	37.5337	129.604	0	2
4.16493	2.75574	3.47078	42.691	94.3217	0	2
4.76645	1.00329	1.26362	58.0247	129.2	0	2
4.48473	0.898855	1.13208	44	122.74	0	2
4.5796	0.830846	1.04643	59.8346	121.552	0	2
4.67799	0.986706	1.24273	47.6573	120.02	0	2
4.54822	0.883752	1.11306	41.3303	109.588	0	2
4.49292	4.27479	5.38398	43.6714	85.0741	0	2
4.44828	0.601881	0.758053	46.1034	110.888	0	2
4.23577	0.743089	0.935902	45.4146	119.75	0	2
4.80682	0.836364	1.05338	62.2545	118.496	0	2
4.52652	0.960227	1.20938	43.2898	101.433	0	2
4.3657	1.08449	1.36589	46.633	101.938	0	2
4.34277	0.889937	1.12085	49.0692	112.35	0	2
4.57801	0.762411	0.960237	67.1986	114.938	0	2
4.58036	1.02679	1.29321	45.7143	105.893	0	2
4.555	1.66625	2.0986	52.7612	103.407	0	2
4.54965	1.12057	1.41133	70.1454	111.653	0	2
4.60223	2.58488	3.25559	48.632	79.6914	0	2
5.00772	1.40927	1.77493	56.4402	108.8	0	2
4.76145	1.22169	1.53868	66.4675	109.396	0	2
4.49692	3.02214	3.80631	45.7638	75.0569	0	2
4.89922	1.50775	1.89897	51.8618	106.814	0	2
4.79336	2.13407	2.68781	54.171	106.882	0	2
4.52527	1.24188	1.56411	61.7238	102.34	0	2
4.6886	1.14474	1.44177	40.8004	103.02	0	2
4.77291	1.18924	1.49782	48.7948	99.4876	0	2
4.60936	1.65107	2.07949	48.3413	87.8708	0	2
4.65921	2.2031	2.77475	55.0034	75.8688	0	2
4.50445	0.95549	1.20341	50.7656	98.94	0	2
4.58161	1.34713	1.69667	45.8989	99.6252	0	2
4.68917	0.989011	1.24563	53.6436	98.4856	0	2
4.80556	1.64043	2.06608	48.9892	86.6733	0	2
4.91721	1.5098	1.90156	50.2919	88.7504	0	2
4.44534	1.81579	2.28694	59.0891	95.4189	0	2
4.6472	2.60981	3.28699	42.4019	96.6611	0	2
4.90123	1.32922	1.67412	54.1564	95.3189	0	2
4.70825	0.867562	1.09267	59.7716	94.18	0	2
4.58561	2.09065	2.63312	49.2719	92.6024	0	2
4.91808	1.65678	2.08667	50.541	81.75	0	2
4.39753	4.85926	6.12011	50.9259	54.4775	0	2
4.91681	2.83189	3.56669	54.0225	66.468	0	2
5.15619	3.12029	3.92992	55.0377	72.5922	0	2
5.03044	1.5363	1.93493	44.5855	78.6643	0	2
4.40254	7.8466	9.88259	52.7405	53.6683	0	2
4.55556	3.07235	3.86955	51.4328	85.0061	0	2
5	1.58178	1.99222	54.0836	81.265	0	2
4.76462	1.58631	1.99791	54.6106	81.0806	0	2
4.7924	1.82749	2.30167	57.2719	80.9657	0	2
4.79802	1.11017	1.39823	53.2825	77.8088	0	2
4.99147	1.77383	2.23409	56.7881	78.9269	0	2
5.54563	2.15146	2.7097	49.9359	78.88	0	2
5.22711	2.86447	3.60772	59.359	66.6816	0	2
4.79605	1.40789	1.77321	53.2796	77.9498	0	2
4.48209	5.25069	6.61311	50.7562	52.9145	0	2
4.97206	4.15968	5.23901	60.6806	76.354	0	2
4.83356	2.48143	3.1253	57.0688	68.2799	0	2
5.18398	1.48665	1.87239	52.3591	74.8348	0	2
4.07343	4.75175	5.9847	47.5105	76.6932	0	2
5.18275	1.62834	2.05085	52.1355	67.2693	0	2
4.63279	3.16557	3.98696	47.6066	72.76	0	2
4.76728	1.01152	1.27398	94.8479	66.5054	0	2
5.29802	2.06921	2.60612	51.2034	69.9682	0	2
5.15899	3.59584	4.52887	55.6404	59.2781	0	2
4.65187	2.70735	3.40984	54.6227	66.8098	0	2
4.675	3.16042	3.98046	65.6396	51.9444	0	2
4.8914	1.99154	2.50829	47.8731	61.4121	0	2
5.14008	4.25097	5.35399	55.2782	59.5	0	2
4.76855	7.84452	9.87997	66.0283	59.0407	0	2
5.12827	2.31948	2.92132	56.0724	50.3533	0	2
4.8166	2.68147	3.37724	49.417	51.2893	0	2
5.14252	2.43705	3.06941	47.1853	57.2655	0	2
4.98879	3.63004	4.57195	64.2623	46.2112	0	2
4.93081	4.35313	5.48266	51.6952	53.7297	0	2
4.6638	2.20613	2.77857	46.7485	44.2392	0	2
4.57479	4.43352	5.5839	47.9224	48.96	0	2
4.40431	8.82345	11.1129	56.1024	47.6	0	2
4.18635	13.0203	16.3987	56.845	26.7068	0	2
3.39859	11.7491	14.7977	56.4818	44.2	0	2
4.00837	10.7824	13.5802	60.1632	26.5548	0	2
6.07903	5.44889	6.86274	122.816	41.2536	0	2
3.86567	11.3159	14.2521	58.9192	28.902	0	2
4.46135	9.91895	12.4927	65.2032	25.0518	0	2
3.81792	1.00434	1.26493	34.3064	188.159	0	2
4.147	0.77176	0.972012	31.7853	210.336	0	2
3.79502	1.2328	1.55268	34.5944	174.326	0	2
4.23088	0.795094	1.0014	36.3175	204.752	0	2
3.85199	1.45302	1.83005	34.0193	158.502	0	2
4.11765	0.51927	0.654007	34.3347	190.74	0	2
4.03009	1.07163	1.34969	38.2865	165.546	0	2
4.2716	0.850309	1.07094	38.8596	188.296	0	2
4.06751	1.0647	1.34096	33.8762	155.04	0	2
4.77393	1.17923	1.4852	48.6721	175.41	0	2
4.15578	0.78392	0.987326	32.3907	179.18	0	2
4.36813	0.642857	0.809662	37.3558	178.161	0	2
4.39105	0.696113	0.876736	38.1213	178.657	0	2
4.24865	1.24865	1.57264	39.773	167.7	0	2
4.1912	0.722146	0.909524	40.8845	174.059	0	2
4.26042	0.787202	0.991461	32.375	172.392	0	2
3.88112	1.15618	1.45618	33.4592	141.64	0	2
4.45091	0.689091	0.867892	35.5764	167.972	0	2
4.34932	0.598174	0.753384	60.8333	166.968	0	2
4.32404	0.728223	0.917178	34.2857	163.54	0	2
4.31838	0.722222	0.90962	49.0021	164.919	0	2
4.75613	0.914839	1.15222	46.3613	153.23	0	2
4.56394	0.87057	1.09646	44.4607	160.299	0	2
4.52292	0.919771	1.15843	42.0759	157.421	0	2
4.19262	0.608347	0.766197	31.5522	152.878	0	2
4.42112	0.694175	0.874295	46.5328	150.265	0	2
4.17109	1.07375	1.35236	43.8186	152.521	0	2
4.33215	0.591038	0.744398	34.2624	146.2	0	2
4.27873	1.04401	1.3149	40.7188	129.184	0	2
4.24764	0.912517	1.14929	39.5397	122.281	0	2
4.13985	1.69023	2.1288	37.9459	107.372	0	2
4.52687	1.03932	1.30899	46.0118	126.162	0	2
4.68755	0.95302	1.2003	43.6629	124.056	0	2
4.12115	0.55	0.692711	44.7346	116.878	0	2
4.48694	2.01306	2.5354	43.7295	119.379	0	2
4.47407	1.19877	1.50981	44.1938	117.947	0	2
4.59467	0.993333	1.25108	43.6573	114.556	0	2
4.0614	0.828947	1.04404	42.2456	112.882	0	2
5.07314	1.07314	1.35159	46.5426	103.555	0	2
4.42713	1.0796	1.35972	43.5998	104.2	0	2
4.57953	0.980465	1.23487	50.9916	106.08	0	2
4.64587	1.52106	1.91574	45.0484	96.3647	0	2
4.69933	1.75973	2.21634	48.3074	81.0463	0	2
4.46792	4.51106	5.68157	51.2035	60.9966	0	2
4.19015	4.84536	6.10261	48.3414	63.6091	0	2
4.6066	1.35763	1.70991	49.2091	84.1423	0	2
4.48963	1.51834	1.91231	49.4418	85.1556	0	2
4.80629	3.12748	3.93898	48.7748	88.0922	0	2
4.64719	0.657503	0.828108	63.5189	86.02	0	2
4.77487	2.50131	3.15033	47.2958	61.3858	0	2
4.29877	9.97882	12.5681	54.1271	41.608	0	2
4.2526	1.22288	1.54019	52.5438	49.6924	0	2
4.78571	1.07143	1.34944	68.8929	68.6876	0	2
4.80769	1.1	1.38542	78.6692	68.34	0	2
4.3731	4.10406	5.16896	48.5482	68.7212	0	2
4.64278	8.95258	11.2755	56.6207	37.8623	0	2
4.40844	3.75916	4.73456	44.5483	66.0659	0	2
4.73369	1.33156	1.67706	43.7656	58.136	0	2
4.92715	3.45475	4.35116	57.0298	47.4163	0	2
4.45347	8.97409	11.3026	53.278	40.46	0	2
3.71465	3.81313	4.80254	42.3889	62.9	0	2
4.08878	16.2466	20.4622	53.1726	29.3525	0	2
4.08323	6.90453	8.69608	43.2118	55.0443	0	2
4.98458	4.54211	5.72067	61.6928	39.9945	0	2
4.3189	6.68209	8.41592	60.1919	32.7972	0	2
2.95142	13.3671	16.8355	46.5236	19.4633	0	2
4.67111	5.88333	7.40991	50.7622	44.2118	0	2
4.84538	3.97566	5.00724	53.0029	42.5	0	2
4.94534	8.57885	10.8048	55.9194	36.38	0	2
3.80282	10.6749	13.4447	54.8474	32.4446	0	2
4.11445	3.74821	4.72078	52.1888	29.92	0	2
3.7164	25.7478	32.4287	65.0297	10.5619	0	2
3.85948	1.05866	1.33336	32.7885	191.877	0	2
3.73243	0.97027	1.22203	28.2149	170.43	0	2
4.21208	0.994109	1.25205	35.0029	187.497	0	2
4.36993	0.747017	0.940848	34.4773	195.171	0	2
4.15064	0.646184	0.813852	36.9722	198.935	0	2
4.13307	0.937984	1.18137	36.2804	198.314	0	2
3.81534	1.23005	1.54921	30.252	161.885	0	2
3.82653	0.471939	0.594395	35.7602	183.263	0	2
3.99107	0.580357	0.730945	41.7121	190.4	0	2
3.89035	0.462719	0.582783	37.0789	178.663	0	2
3.83155	1.20827	1.52178	34.0796	153.241	0	2
4.15744	1.09343	1.37714	39.417	183.766	0	2
4.14882	1.02142	1.28645	32.478	163.158	0	2
4.41946	0.97651	1.22989	40.1661	174.271	0	2
4.25627	0.623955	0.785856	35.9206	167.38	0	2
11.1459	0.948177	1.1942	90.3954	162.377	0	2
4.24733	0.871756	1.09795	35.1985	150.176	0	2
4.62879	0.583333	0.734693	32.3106	158.144	0	2
4.90923	0.757433	0.953968	40.2879	154.062	0	2
4.33108	0.813514	1.0246	41.2338	138.712	0	2
4.20968	0.703812	0.886433	33.2537	141.821	0	2
4.23438	0.767188	0.966253	38.2094	138.673	0	2
4.36638	1.24547	1.56863	47.029	135.596	0	2
4.31272	0.527943	0.66493	46.2378	134.683	0	2
3.84848	0.732323	0.922342	40.8662	120.013	0	2
4.16534	0.630952	0.794668	54.1177	103.852	0	2
4.52632	1.00987	1.2719	40.7845	118.32	0	2
4.30407	1.04071	1.31075	42.7812	114.386	0	2
4.5136	1.47734	1.86067	41.5015	109.82	0	2
4.07875	1.18128	1.48779	37.679	108.876	0	2
4.13605	1.33673	1.68358	41.0391	80.289	0	2
4.38532	0.739187	0.930987	64.7497	102.928	0	2
4.34015	1.59079	2.00356	41.2161	95.2	0	2
4.40167	2.96374	3.73275	45.5425	66.8427	0	2
4.39493	0.768116	0.967422	57.3841	83.0192	0	2
4.9184	1.1584	1.45897	53.64	89.08	0	2
4.88504	0.896063	1.12857	46.2331	86.0872	0	2
4.40223	0.91256	1.14935	38.4134	84.8346	0	2
4.49648	2.95077	3.71642	43.1941	81.7387	0	2
4.84489	1.82093	2.29342	59.5057	77.9201	0	2
4.55459	1.93777	2.44057	53.9072	65.7362	0	2
4.8934	3.05098	3.84264	53.9745	55.8108	0	2
4.61774	2.1896	2.75775	46.9037	60.7773	0	2
4.73354	0.970742	1.22262	63.0073	62.56	0	2
4.83481	5.76497	7.26083	52.0166	52.7	0	2
4.22308	13.2718	16.7155	53.6923	28.89	0	2
4.56128	6.21031	7.82172	45.7799	48.8525	0	2
7.09343	5.29931	6.67434	80.609	39.2475	0	2
4.30354	7.15008	9.00535	53.3761	40.8127	0	2
4.8366	10.7252	13.5081	62.3543	24.48	0	2
3.4875	0.4925	0.620291	32.745	180.897	0	2
3.66992	0.638672	0.804391	26.9785	186.509	0	2
4.1151	0.958146	1.20676	33.2167	188.037	0	2
4.32394	1.25509	1.58075	35.2034	195.732	0	2
4.33238	0.962751	1.21256	35.51	186.564	0	2
3.88404	0.798193	1.0053	31.9639	186.515	0	2
4.31903	0.733244	0.923502	39.2158	184.816	0	2
4.1026	0.882948	1.11205	37.5621	177.448	0	2
4.59618	0.751987	0.947109	38.0795	156.078	0	2
3.99794	0.899177	1.13249	30.9794	139.471	0	2
3.93956	0.556777	0.701246	33.9982	151.071	0	2
4.53562	0.887671	1.118	39.8096	147.22	0	2
4.49743	0.958869	1.20767	41.8676	128.191	0	2
4.34888	0.701826	0.883931	47.213	125.12	0	2
4.02873	2.11081	2.65851	37.5472	88.8077	0	2
4.48267	0.874667	1.10162	40.832	117.953	0	2
4.39757	1.38005	1.73814	47.5768	115.632	0	2
4.48096	2.51777	3.17106	43.7398	76.7504	0	2
4.39178	1.08767	1.36989	38.6685	98.9558	0	2
4.16452	3	3.77842	45.3021	71.8776	0	2
4.42337	1.13693	1.43194	44.5678	95.6271	0	2
4.29878	1.15854	1.45915	43.3272	76.8408	0	2
4.26847	1.36932	1.72462	40.8565	87.2714	0	2
4.65238	2.2381	2.81882	48.981	69.4832	0	2
4.65229	1.0616	1.33706	45.7789	78.9071	0	2
4.60066	3.61726	4.55584	48.5863	49.4171	0	2
4.38002	8.7177	10.9797	45.2638	43.7558	0	2
4.46743	2.12343	2.6744	43.592	76.9482	0	2
4.90652	1.33261	1.67839	51.9467	67.6976	0	2
4.35211	4.82316	6.07465	45.4038	63.8739	0	2
4.23131	11.7894	14.8485	46.8271	45.56	0	2
4.28518	19.3471	24.3672	60.2617	14.7303	0	2
4.45444	17.5548	22.1098	61.3749	20.5412	0	2
4.61508	12.6312	15.9086	65.2171	21.1785	0	2
3.25075	13.9672	17.5913	43.4985	21.42	0	2
3.50625	4.57875	5.76682	97.3975	5.60742	0	2
4.6218	13.4905	16.991	59.1646	19.04	0	2
3.2164	17.3421	21.8419	48.9215	20.1635	0	2
4.34844	27.7379	34.9351	90.3506	11.9	0	2
4.1131	0.767857	0.967096	32.3229	211.559	0	2
4.35	0.787143	0.991386	33.8114	211.589	0	2
3.82175	0.996435	1.25498	32.1176	209.54	0	2
4.14548	0.778249	0.980184	39.5325	204.782	0	2
3.99044	0.625239	0.787472	33.2256	198.595	0	2
4.07167	0.658703	0.82962	45.5256	182.24	0	2
3.76	0.651667	0.820757	33.8433	179.662	0	2
4.93172	1.00996	1.27202	37.1451	170.435	0	2
3.88277	0.937853	1.1812	32.0621	147.742	0	2
4.22446	0.802419	1.01063	34.1411	173.416	0	2
4.43541	0.583732	0.735195	34.8788	165.58	0	2
4.28452	0.714086	0.899373	38.2692	161.643	0	2
4.43204	1.09392	1.37777	39.4199	159.945	0	2
3.86988	1.00292	1.26316	35.1813	133.129	0	2
4.4502	1.01637	1.28009	37.3547	146.753	0	2
4.09105	0.76783	0.967062	38.2747	153.718	0	2
4.18071	0.680707	0.857332	35.019	129.398	0	2
4.20886	0.994937	1.2531	36.1696	119.057	0	2
4.05422	0.492771	0.620632	48.2157	135.32	0	2
4.25963	1.11983	1.4104	34.7175	135.769	0	2
3.96561	0.807643	1.01721	37.1363	120.891	0	2
4.41507	0.861891	1.08553	37.1743	127.163	0	2
4.26094	1.04062	1.31064	37.6828	123.769	0	2
4.34585	0.743523	0.936448	41.6788	128.281	0	2
4.20282	1.36329	1.71702	37.4005	95.1332	0	2
4.15297	1.0493	1.32157	37.0834	110.27	0	2
4.36037	0.680851	0.857514	57.3218	118.709	0	2
4.19785	1.0143	1.27749	41.553	96.3161	0	2
4.2901	2.77824	3.49912	45.4644	74.2073	0	2
4.50442	1.30721	1.64639	48.0872	88.9508	0	2
4.37099	1.9735	2.48557	81.2176	55.6957	0	2
4.44635	2.97711	3.74959	46.5193	58.9966	0	2
4.68441	1.31559	1.65695	46.2649	79.1521	0	2
4.66949	1.0908	1.37383	47.1864	79.5607	0	2
4.1784	0.779343	0.981562	62.0657	78.2	0	2
4.30122	1.98293	2.49745	43.422	75.0784	0	2
4.0953	12.3074	15.5008	58.353	34.2743	0	2
4.20578	1.19218	1.50152	53.835	47.4492	0	2
4.70767	2.40293	3.02643	47.3093	60.8153	0	2
4.20876	3.72993	4.69775	42.3139	67.7147	0	2
4.97024	4.54266	5.72136	56.0218	45.8092	0	2
4.81138	6.125	7.71428	50.7578	45.546	0	2
4.29111	6.48113	8.16282	42.9973	56.2738	0	2
4.18706	12.166	15.3227	48.5415	24.0248	0	2
4.67253	5.70082	7.18003	51.9648	38.76	0	2
4.48276	12.8654	16.2036	59.4204	18.498	0	2
3.79531	6.19219	7.7989	51.5531	31.62	0	2
4.6825	12.9132	16.2638	52.7422	29.9374	0	2
4.57159	2.43423	3.06584	71.6519	28.2528	0	2
4.91088	14.291	17.9991	57.5727	27.5924	0	2
4.94226	10.723	13.5054	82.5372	16.2703	0	2
4.45825	14.3585	18.0841	56.9847	13.94	0	2
4.55724	32.5983	41.0567	63.04	10.54	0	2
3.83109	1.3423	1.69059	31.2108	170.167	0	2
3.85349	0.476529	0.600176	43.9161	174.709	0	2
3.5367	0.486239	0.612405	33.7294	151.145	0	2
3.53882	0.430588	0.542315	33.0918	145.131	0	2
3.66813	0.447368	0.563449	42.6418	152.854	0	2
3.9329	0.674304	0.849269	30.3895	176.12	0	2
3.71713	1.21116	1.52542	30.0359	137.759	0	2
4.14647	0.609403	0.767528	40.8499	170.476	0	2
3.87037	0.993266	1.25099	30.4108	161.441	0	2
4.35868	0.664463	0.836874	33.0364	149.965	0	2
4.20167	0.820584	1.0335	40.6704	137.327	0	2
4.19697	1.06566	1.34217	44.1616	129.819	0	2
4.24496	0.813953	1.02515	41.8186	123.477	0	2
4.15995	1.08199	1.36274	38.4422	111.313	0	2
4.01206	1.86461	2.34843	38.1139	95.1089	0	2
4.25948	0.763848	0.962047	40.5627	111.86	0	2
4.23694	0.524909	0.661109	45.6488	106.026	0	2
4.33645	1.00668	1.26788	40.8611	105.958	0	2
4.05096	0.742038	0.934578	34.4889	82.648	0	2
4.25753	0.86747	1.09256	44.4096	96.6569	0	2
4.25284	4.17504	5.25836	40.671	60.0117	0	2
4.19655	1.34828	1.69812	41.1483	73.3959	0	2
4.31658	3.71739	4.68196	45.6535	59.7946	0	2
4.89734	1.69455	2.13424	55.9113	66.8427	0	2
4.19565	1.52484	1.9205	65.2774	40.3584	0	2
4.56942	15.3366	19.3161	62.4432	24.3759	0	2
4.63479	13.5073	17.0121	60.6614	29.8678	0	2
4.67137	8.61605	10.8517	54.1952	45.9	0	2
5.51045	2.90941	3.66432	57.939	44.3579	0	2
4.4139	3.85498	4.85525	50.1435	40.46	0	2
4.38783	6.73043	8.47681	62.4226	20.4	0	2
5.36056	17.1202	21.5624	64.1211	15.6732	0	2
3.86047	0.891473	1.12279	29.6744	205.249	0	2
3.2303	1.08081	1.36125	27.5212	173.748	0	2
4.036	0.885333	1.11505	32.292	190.755	0	2
4.19847	0.728244	0.917205	36.9542	181.035	0	2
4.03407	0.681481	0.858308	34.4889	159.149	0	2
4.87092	1.09644	1.38094	37.6558	149.896	0	2
3.65756	0.326367	0.41105	56.7042	126.349	0	2
4.13893	0.903817	1.13833	35.626	140.963	0	2
4.05679	0.65097	0.819879	32.6856	149.754	0	2
4.15489	0.949728	1.19616	34.7391	136.68	0	2
3.72947	0.997585	1.25643	35.6014	114.344	0	2
4.41056	0.768313	0.967671	42.5656	118.029	0	2
4.27958	1.14501	1.44211	37.6009	108.313	0	2
4.03412	0.652452	0.821746	40.3646	107.191	0	2
3.89651	0.503008	0.633526	52.1348	102.226	0	2
3.97113	1.39108	1.75202	38.332	89.5563	0	2
4.33787	1.08045	1.36079	41.3713	94.9203	0	2
4.15603	1.29787	1.63464	38.0833	98.5191	0	2
4.4492	1.48529	1.87069	40.9118	86.5452	0	2
4.48266	1.09104	1.37414	43.1561	81.2166	0	2
3.9196	8.17211	10.2926	44.4912	50.5138	0	2
4.29144	2.35027	2.9601	42.2406	70.8515	0	2
3.60987	0.533439	0.671853	38.2293	85.68	0	2
4.44473	2.21855	2.79421	47.7141	62.1689	0	2
4.2191	2.22472	2.80198	42.2846	64.0798	0	2
4.48983	3.19405	4.02283	53.615	51.269	0	2
4.29263	3.12109	3.93093	45.3956	52.9462	0	2
4.47948	7.97421	10.0433	49.8992	41.6094	0	2
3.98603	12.1145	15.2579	50.5168	17.8135	0	2
4.34993	11.1479	14.0405	55.4495	28.1215	0	2
4.47574	17.0162	21.4314	59.549	11.3989	0	2
4.45936	4.0189	5.06171	71.0983	26.5287	0	2
4.62224	8.17253	10.2931	112.285	3.5497	0	2
5.20022	42.6245	53.6844	71.6872	7.14	0	2
3.76667	0.919298	1.15783	30.3947	177.476	0	2
3.9548	0.639831	0.80585	32.7839	211.219	0	2
3.72222	0.684444	0.86204	27.6178	186.632	0	2
3.68413	0.452096	0.569403	33.3009	197.038	0	2
4.15864	0.788952	0.993664	31.7521	191.254	0	2
4.13056	0.611276	0.769886	33.5237	175.781	0	2
3.7148	0.904332	1.13898	29.6516	144.073	0	2
4.14605	0.845007	1.06427	34.6364	172.964	0	2
4.46233	0.779911	0.982278	37.3072	172.25	0	2
4.1073	0.583691	0.735144	35.6924	155.41	0	2
3.70833	0.467593	0.588921	40.3657	140.338	0	2
4.08835	0.787452	0.991775	39.1601	137.283	0	2
4.15616	0.710959	0.895434	39.1616	123.783	0	2
4.09541	0.913043	1.14995	37.32	122.06	0	2
3.89015	0.560606	0.706069	39.4527	96.22	0	2
3.97148	2.16399	2.72549	48.2906	54.6903	0	2
4.45727	1.93403	2.43586	45.1319	59.9211	0	2
4.89498	1.25799	1.58441	49.0183	60.18	0	2
4.38617	2.51383	3.1661	72.7947	34.9473	0	2
4.28515	7.15506	9.01161	47.1183	27.0722	0	2
5.01846	5.76462	7.26038	49.4754	36.6475	0	2
4.88588	13.4458	16.9347	60.3245	24.82	0	2
4.54529	21.1949	26.6944	57.3422	11.9	0	2
4.15082	4.22731	5.32418	80.7898	2.40416	0	2
3.93784	0.448649	0.565061	31.1432	188.045	0	2
4.18922	0.930355	1.17176	35.1603	186.159	0	2
4.41667	0.938406	1.1819	36.2065	139.014	0	2
4.19248	0.685714	0.863639	37.8451	147.845	0	2
3.85006	0.380421	0.479131	49.71	122.48	0	2
4.08281	0.50625	0.637609	55.4891	110.84	0	2
4.23011	2.02938	2.55595	36.7576	102.34	0	2
4.07311	3.9658	4.99483	43.6226	55.9432	0	2
3.99593	2.90909	3.66392	39.9634	45.006	0	2
4.60982	2.63579	3.31971	46.7502	66.1359	0	2
4.45946	2.10576	2.65215	50.9142	66.6816	0	2
4.50704	3.0507	3.84228	42.1141	71.4	0	2
4.56268	6.96793	8.77593	53.5685	45.9843	0	2
4.519	3.33683	4.20265	46.1468	66.3035	0	2
4.59115	2.30965	2.90895	46.9732	54.6174	0	2
4.16148	2.53926	3.19813	48.3704	39.3358	0	2
4.30649	17.3588	21.8629	55.2657	18.7093	0	2
4.43726	3.14639	3.96279	68.1949	34.0425	0	2
4.4875	14.733	18.5558	60.933	15.9365	0	2
4.22252	13.6515	17.1937	53.693	3.46733	0	2
4.95804	4.93473	6.21517	87.5851	16.7431	0	2
4.07021	5.43617	6.84672	70.1936	24.5649	0	2
4.36237	4.14215	5.21693	82.9088	3.06	0	2
4.26825	5.27564	6.64453	141.188	3.4	0	2
3.31935	1.42581	1.79577	25.7677	179.188	0	2
3.85038	0.748106	0.94222	31.6345	214.207	0	2
3.84974	0.437824	0.551428	37.171	211.194	0	2
3.39833	0.364903	0.459585	32.0251	189.388	0	2
4.13594	1.14375	1.44052	29.95	208.906	0	2
3.48276	0.33687	0.424279	32.2653	186.28	0	2
3.73218	1.16631	1.46893	31.1987	157.769	0	2
3.88916	0.542022	0.682663	34.6711	145.663	0	2
4.65501	0.997036	1.25574	43.0409	136.355	0	2
4.12378	0.833876	1.05025	32.2704	135.783	0	2
3.64809	0.692082	0.87166	44.9433	117.318	0	2
4.08696	0.361556	0.455371	40.1579	112.208	0	2
3.92308	1.21185	1.5263	35.2989	100.758	0	2
4.28322	0.951678	1.19861	39.5651	110.017	0	2
3.98423	2.45335	3.08993	39.134	75.0499	0	2
4.24368	0.726597	0.915131	35.8202	97.4004	0	2
4.03383	3.94129	4.96396	40.4448	58.2602	0	2
4.32059	3.19482	4.02379	43.9359	68.5292	0	2
4.89468	7.70594	9.70544	85.3743	13.4719	0	2
4.3698	20.8042	26.2023	49.5372	18.7	0	2
4.56569	3.89608	4.90701	79.7559	4.472	0	2
3.44584	3.29975	4.15595	77.9018	2.38	0	2
3.95224	4.85672	6.11691	74.3493	2.04	0	2
3.96308	0.62	0.780874	29.5292	200.267	0	2
3.74783	0.943478	1.18829	31.4457	164.432	0	2
3.74818	0.999091	1.25833	34.9382	147.297	0	2
4.15846	1.26631	1.59489	32.4913	155.671	0	2
3.68474	2.64187	3.32736	33.4426	95.676	0	2
4.25313	0.924896	1.16488	38.3074	123.867	0	2
4.17683	0.718496	0.904927	36.5122	107.191	0	2
4.24963	1.73151	2.1808	40.2079	89.3521	0	2
4.43163	1.20809	1.52155	39.9215	91.172	0	2
4.21687	1.18675	1.49468	47.4247	83.2472	0	2
3.89803	0.490161	0.617345	36.6261	80.58	0	2
4.26426	2.10511	2.65133	42.4249	56.4492	0	2
4.69139	6.35407	8.00278	61.4665	42.4837	0	2
4.60887	50.2187	63.2492	60.8177	7.82	0	2
3.58842	5.62219	7.081	76.1061	4.76	0	2
4.2963	6.69444	8.43148	76.4512	3.4	0	2
4.00642	5.13119	6.4626	58.3807	1.7	0	2
3.96037	0.494172	0.622397	27.8648	211.23	0	2
4.02007	0.966555	1.21735	37.5619	193.873	0	2
4.88934	0.875	1.10204	40.6578	176.578	0	2
3.68739	0.519862	0.654753	34.4214	121.194	0	2
3.78303	0.398042	0.501324	43.0294	129.959	0	2
3.90084	0.763441	0.961534	35.2162	125.477	0	2
3.65455	1.04364	1.31443	36.0036	102.478	0	2
4.32703	1.41892	1.78709	37.6473	91.46	0	2
4.13194	4.93588	6.21662	49.2922	60.9852	0	2
4.26984	2.28254	2.8748	55.4762	55.0138	0	2
4.38734	10.3557	13.0427	52.9304	36.5638	0	2
4.24716	3.14631	3.96269	44.1435	50.3533	0	2
4.40763	7.99285	10.0668	56.1979	40.6467	0	2
4.11503	11.0023	13.8571	48.5273	37.4077	0	2
4.38655	16.1637	20.3577	57.262	28.3976	0	2
4.19741	12.2622	15.444	50.3055	23.2596	0	2
4.64873	42.0284	52.9337	58.6057	16.32	0	2
4.51753	5.21402	6.56693	84.1541	4.472	0	2
5.35835	4.49879	5.66611	102.954	4.86806	0	2
3.31264	0.423503	0.533392	27.5809	175.898	0	2
3.41281	0.737841	0.929292	34.2894	164.156	0	2
3.22062	0.290168	0.365459	29.0671	174.612	0	2
3.82126	0.528505	0.665639	29.3174	184.998	0	2
3.63411	0.304665	0.383717	39.8192	182.24	0	2
5.16822	1.44652	1.82186	39.5763	169.718	0	2
3.78319	0.786136	0.990118	27.3407	160.687	0	2
3.89171	4.07888	5.13724	37.9064	86.6547	0	2
4.14168	1.15606	1.45602	49.9384	72.1738	0	2
5.68705	2.27948	2.87094	46.671	44.831	0	2
7.24406	5.84233	7.35827	71.2721	27.0743	0	2
4.43478	38.0664	47.9436	61.5595	9.35464	0	2
4.30142	6.14894	7.74443	62.6418	7.48	0	2
3.62478	0.639138	0.804978	29.5781	212.336	0	2
4.825	1.05167	1.32455	34	213.52	0	2
4.20337	0.963731	1.21379	32.9702	210.137	0	2
3.74499	0.497135	0.626128	28.1117	195.218	0	2
3.42965	2.86233	3.60503	28.4206	157.79	0	2
4.02157	0.75098	0.94584	33.1275	186.952	0	2
3.81679	0.769466	0.969122	27.7466	180.668	0	2
3.81977	0.244186	0.307546	29.1899	166.059	0	2
3.72393	0.560736	0.706233	39.3067	121.056	0	2
4.05006	0.62116	0.782335	31.6849	143.413	0	2
4.60742	1.70556	2.14811	53.5692	135.32	0	2
3.79374	1.4367	1.80949	34.1351	124.452	0	2
4.25445	0.832061	1.04796	39.3562	105.74	0	2
4.11463	1.03318	1.30127	38.902	96.265	0	2
3.90929	1.50996	1.90175	37.7069	97.5273	0	2
4.4617	1.68944	2.12781	52.2609	73.1695	0	2
4.43266	7.4565	9.39126	51.8451	45.9403	0	2
4.26673	2.91989	3.67752	39.9793	74.4313	0	2
4.67467	1.38865	1.74896	55.024	66.2128	0	2
4.12982	5.33671	6.72145	51.8458	51.0736	0	2
4.68267	7.33473	9.2379	52.3236	55.9473	0	2
4.12184	8.12638	10.235	56.5476	25.5815	0	2
4.50915	48.6533	61.2776	56.6831	18.36	0	2
4.57338	6.2038	7.81353	75.8494	7.26837	0	2
4.08189	0.947891	1.19384	35.9653	201.18	0	2
3.86855	0.509606	0.641835	34.6107	203.442	0	2
4.51617	1.20081	1.51239	36.9825	204.001	0	2
4.27014	0.729858	0.919237	38.842	170.345	0	2
4.35558	1.84339	2.3217	36.7843	122.74	0	2
4.16607	1.83274	2.30828	40.4659	94.5524	0	2
4.39699	1.5463	1.94752	62.2025	81.6482	0	2
4.59544	3.2094	4.04216	45.0698	73.2422	0	2
4.73599	2.72229	3.42866	47.071	76.5491	0	2
4.16276	5.88779	7.41552	48.7509	55.7185	0	2
4.09168	18.483	23.2788	45.6285	34.6733	0	2
4.3832	12.6588	15.9434	55.2559	35.8744	0	2
4.35636	17.6852	22.2741	61.04	32.3644	0	2
4.21566	35.006	44.0892	53.7735	22.5377	0	2
4.39961	15.6217	19.6752	52.6586	26.4458	0	2
4.06934	7.42993	9.3578	61.4394	20.4	0	2
3.38528	0.571429	0.7197	23.9524	182.18	0	2
4.4568	0.99676	1.25539	36.1274	184.509	0	2
3.93506	0.388167	0.488887	50.9206	181.9	0	2
3.47596	0.591346	0.744785	33.6587	134.3	0	2
3.25217	0.391304	0.492838	34.8609	131.121	0	2
4.31804	0.785933	0.989862	33.5826	146.994	0	2
4.41613	0.709677	0.89382	38.1	106.689	0	2
4.48581	1.78166	2.24395	41.3439	95.5926	0	2
4.40285	3.91622	4.93238	45.4938	68.3747	0	2
4.14971	9.16725	11.5459	43.9813	40.4471	0	2
3.94981	1.93123	2.43233	56.0725	45.9503	0	2
4.38182	1.91364	2.41018	63.0659	46.7435	0	2
4.30751	7.4385	9.3686	63.7228	14.28	0	2
3.92939	0.747839	0.941883	38.1715	196.181	0	2
3.78522	5.25789	6.62218	47.0308	99.0107	0	2
4.47086	4.05829	5.11131	48.2914	74.6283	0	2
4.69418	0.971583	1.22368	62.3992	72.08	0	2
4.15247	3.22422	4.06082	40.299	55.7952	0	2
4.43446	5.3221	6.70304	47.6604	53.7297	0	2
4.58879	10.0104	12.6079	63.3647	30.1126	0	2
3.54562	0.484794	0.610586	28.7013	213.009	0	2
3.77384	7.08311	8.92099	54.0736	40.7561	0	2
3.56783	6.22867	7.84484	63.8085	8.92459	0	2
66.1916	15.6072	6.67665	56.5145	66.0029	1	3
115.33	34.3228	14.683	70.4217	52.7	1	3
88.2052	32.855	14.0551	65.7913	50.3211	1	3
79.0874	14.8998	6.37401	54.8089	71.74	1	3
79.453	9.29781	3.97753	33.2429	173.561	1	3
78.2447	45.8147	19.5992	73.8674	37.0616	1	3
71.0232	37.3807	15.9912	44.0204	73.1435	1	3
79.8539	8.96127	3.83356	34.7676	172.38	1	3
118.197	13.1133	5.60977	58.6256	84.66	1	3
99.5352	12.0741	5.1652	67.6926	78.2	1	3
121.208	14.4432	6.17871	62.8108	80.92	1	3
55.2686	49.9419	21.3648	72.5585	49.9904	1	3
49.6108	12.804	5.47744	68.6354	54.2137	1	3
84.5436	28.4489	12.1702	49.3712	69.9392	1	3
78.4259	85.5024	36.5773	60.1282	22.78	1	3
31.3609	3.32668	1.42313	46.4066	73.44	1	3
26.377	27.917	11.9427	58.44	61.78	1	3
35.2336	7.31766	3.13044	40.5926	107.178	1	3
38.9965	2.30671	0.986794	45.4988	93.5	1	3
59.5823	76.6501	32.7903	64.3029	42.5	1	3
44.6758	45.122	19.3028	44.5044	60.5811	1	3
35.8749	8.07103	3.45272	36.5896	113.987	1	3
42.4951	43.9235	18.7902	61.5734	21.6882	1	3
82.7448	54.939	23.5025	55.3152	35.0051	1	3
32.7948	8.81636	3.77157	41.3765	94.9794	1	3
114.552	70.6561	30.2262	50.2991	39.78	1	3
37.4302	3.90048	1.6686	48.9037	85	1	3
38.007	18.4731	7.90267	50.1986	72.42	1	3
42.1865	51.9728	22.2336	55.9646	54.4053	1	3
34.9616	33.2961	14.2438	70.2846	12.24	1	3
38.5418	68.0162	29.0968	68.4271	6.8	1	3
68.0968	40.486	17.3196	57.4548	63.5691	1	3
51.0112	28.3633	12.1336	50.2889	96.9924	1	3
64.9692	17.2909	7.39692	38.5469	106.442	1	3
72.3511	69.3183	29.6538	48.0727	30.6	1	3
57.5264	57.0874	24.4215	52.6402	39.44	1	3
48.8025	12.3426	5.28007	44.037	90.1776	1	3
52.2632	40.6311	17.3817	46.7292	52.2373	1	3
51.2112	54.9523	23.5082	51.5272	44.2327	1	3
17.638	2.31477	0.990241	42.0194	109.445	1	3
51.5031	3.90397	1.67009	56.6451	87.72	1	3
64.4954	63.9231	27.3458	58.4108	43.86	1	3
53.5979	40.7573	17.4357	45.7698	61.78	1	3
65.7737	72.8394	31.1602	57.8104	36.0544	1	3
37.8194	41.6011	17.7966	58.6269	49.9372	1	3
34.4393	12.5537	5.37036	44.4734	107.614	1	3
35.9361	12.7467	5.45295	57.2231	69.6295	1	3
56.5913	33.8719	14.4902	54.9002	92.0352	1	3
40.0992	27.2309	11.6492	61.7994	41.4814	1	3
49.9982	10.9396	4.67987	40.5915	98.4105	1	3
38.7179	14.8477	6.35172	37.8731	98.7897	1	3
35.379	22.0627	9.43825	49.914	48.4819	1	3
48.2644	72.8624	31.17	47.5428	28.4241	1	3
59.2707	73.2987	31.3566	47.1085	26.2153	1	3
39.4464	13.2639	5.67419	35.9087	108.907	1	3
45.823	51.1687	21.8896	54.1687	40.8	1	3
56.735	41.9514	17.9465	51.5026	63.24	1	3
47.3305	20.7099	8.85954	49.5275	75.48	1	3
31.3346	11.94	5.10783	36.4955	115.121	1	3
46.9369	22.2342	9.51163	45.3173	85.5132	1	3
40.8398	19.9144	8.51921	41.3771	87.8313	1	3
46.8634	24.8497	10.6305	56.6776	82.2505	1	3
50.2318	30.7325	13.1471	72.7956	82.3797	1	3
42.5773	61.0778	26.1286	52.5691	51.8987	1	3
65.1031	64.9416	27.7815	55.0662	57.749	1	3
67.2023	30.0156	12.8404	42.0792	88.74	1	3
48.8803	29.8357	12.7635	49.7261	57.8	1	3
32.3997	15.8131	6.76472	42.1351	82.0105	1	3
45.7252	27.0568	11.5747	48.3316	79.0915	1	3
50.8055	22.9252	9.80722	56.4988	62.2655	1	3
36.7178	11.3914	4.87316	31.2978	116.418	1	3
67.1152	82.0914	35.1181	44.3635	21.8898	1	3
52.9127	51.1021	21.8611	42.925	45.0971	1	3
47.735	57.0536	24.4071	42.2779	31.28	1	3
50.8573	37.5479	16.0627	54.2934	44.9122	1	3
39.0702	29.1117	12.4538	43.9413	38.2632	1	3
43.6519	10.225	4.37416	35.4007	101.145	1	3
50.6542	51.526	22.0424	45.6688	54.6079	1	3
44.6442	31.3869	13.4271	49.5984	68.7818	1	3
49.8687	66.7983	28.5758	52.5422	36.8206	1	3
34.9459	13.4302	5.74534	35.6524	116.33	1	3
44.9156	42.2071	18.0559	60.2704	65.4533	1	3
51.6919	38.7721	16.5864	42.7617	75.233	1	3
52.6295	74.2577	31.7669	51.5611	42.84	1	3
46.5526	18.3138	7.83451	42.7748	94.5628	1	3
39.3759	16.4079	7.01916	42.1462	79.1441	1	3
53.2566	49.9136	21.3526	68.0127	66.259	1	3
48.2516	51.4954	22.0293	38.5692	53.4882	1	3
4.21343	1.62823	0.696543	38.7315	194.326	0	3
4.22057	2.24763	0.96152	51.7442	97.8031	0	3
4.30894	2.47154	1.05731	46.0921	139.791	0	3
3.52266	1.71148	0.732158	35.1601	212.324	0	3
4.60082	21.7861	9.31993	67.109	36.0224	0	3
4.10748	1.44393	0.6177	35.7368	199.809	0	3
4.77959	3.03946	1.30026	44.4816	134.731	0	3
5.31401	5.67123	2.42611	49.4489	92.6904	0	3
3.97804	2.11318	0.904001	44.9426	109.713	0	3
5.45579	24.5122	10.4861	68.2805	24.3332	0	3
4.08394	1.26825	0.542547	41.6204	171.851	0	3
4.1	2.29792	0.983031	48.15	137.72	0	3
5.74156	28.0636	12.0054	64.5429	38.757	0	3
6.63438	7.76562	3.32208	63.8375	57.6999	0	3
5.67197	2.63163	1.12579	48.6762	104.615	0	3
3.70245	1.47962	0.63297	31.9864	197.905	0	3
5.33144	3.94697	1.68848	78.8314	88.3804	0	3
4.49453	2.93654	1.25623	42.593	149.666	0	3
3.91827	1.55288	0.664312	34.2051	214.424	0	3
5.55075	2.42596	1.03781	46.3078	104.861	0	3
6.80349	2.06703	0.884261	66.1736	81.6	0	3
4.29831	2.05254	0.878062	45.0949	182.586	0	3
5.76107	2.13969	0.915345	53.3664	102.68	0	3
3.61355	1.58964	0.680037	35.0637	218.229	0	3
6.40763	15.1359	6.47501	80.1144	32.98	0	3
4.85673	1.70338	0.728695	54.8733	123.76	0	3
4.45362	2.43319	1.0409	44.1966	192.1	0	3
5.24074	1.39352	0.596137	52.5324	102.467	0	3
3.76554	1.10881	0.47434	50.3614	187.13	0	3
4.30105	2.23037	0.954134	48.6571	149.143	0	3
6.33333	22.3522	9.56211	81.722	23.12	0	3
4.47317	2.53821	1.08583	47.7512	144.73	0	3
5.18741	2.41345	1.03245	41.9413	113.128	0	3
5.92758	4.29122	1.83575	57.8475	82.5892	0	3
6.04395	2.30146	0.984549	60.0347	96.4845	0	3
5.36312	3.08511	1.31979	47.2879	79.0915	0	3
4.68402	1.49372	0.639001	46.7846	112.745	0	3
5.725	3.48382	1.49035	46.0941	91.1967	0	3
3.56597	1.81453	0.776243	33.6692	212.109	0	3
6.30786	4.15074	1.77566	57.2824	68.9831	0	3
5.37415	4.10204	1.75482	49.6139	78.3661	0	3
6.77679	8.56964	3.66603	60.3714	51.8408	0	3
4.31276	2.30041	0.984099	52.9835	121.993	0	3
4.48251	2.24625	0.96093	41.4839	143.267	0	3
6.8541	6.81915	2.91718	58.2796	56.8451	0	3
3.42598	1.48943	0.637165	38.6012	166.224	0	3
5.66084	3.55437	1.52053	49.7772	105.037	0	3
6.20781	7.23307	3.09425	60.2882	65.8179	0	3
6.04201	14.0732	6.0204	62.1165	41.3768	0	3
5.18532	3.51834	1.50512	54.0517	112.766	0	3
4.55605	2.33038	0.99692	55.5649	135.052	0	3
5.6426	8.19172	3.50435	55.3763	74.684	0	3
5.81894	16.0056	6.84706	62.1128	26.1601	0	3
3.93416	1.76335	0.754346	37.8238	163.033	0	3
4.83871	10.3826	4.44162	63.6641	34.3669	0	3
4.94408	22.4559	9.60647	61.0398	9.18	0	3
5.58907	8.28741	3.54529	56.0736	62.1819	0	3
6.45362	15.1144	6.46581	67.7421	48.8867	0	3
5.64983	7.40643	3.16841	51.93	82.0986	0	3
5.1632	19.4154	8.30577	68.6128	29.92	0	3
3.93663	2.06139	0.881845	38.6059	196.989	0	3
5.16655	3.19397	1.36636	45.1823	126.7	0	3
4.21841	1.82059	0.778836	39.3385	151.616	0	3
5.90944	19.9388	8.52966	58.926	45.9252	0	3
4.69041	7.83571	3.35206	72.5812	63.5182	0	3
5.80695	32.1158	13.7389	90.121	31.0314	0	3
4.2428	5.23868	2.24107	45.0329	88.7094	0	3
4.52244	5.15385	2.20478	55.6635	86.9151	0	3
4.01202	9.41255	4.02662	45.733	68.6093	0	3
4.94848	19.8164	8.4773	69.1215	47.5818	0	3
5.0542	5.08672	2.17606	59.5691	92.7608	0	3
5.29781	9.23006	3.94855	65.3825	79.4888	0	3
4.80761	3.91966	1.6768	58.5328	110.689	0	3
4.60667	7.94742	3.39985	49.8291	76.8761	0	3
4.6695	10.9465	4.68285	60.9368	56.9944	0	3
4.50967	35.1459	15.0351	95.8471	9.249	0	3
3.39213	1.1967	0.511939	77.401	160.348	0	3
5.37466	6.51607	2.78753	72.9082	83.3999	0	3
4.55426	2.04841	0.876296	34.975	192.791	0	3
4.34628	2.66723	1.14102	42.125	136.034	0	3
5.24286	11.0107	4.7103	54.0262	76.931	0	3
5.2014	15.8126	6.76452	61.1152	51.1143	0	3
4.85	3.94259	1.68661	49.3963	125.432	0	3
5.46302	5.69775	2.43745	50.3044	84.3447	0	3
3.36592	12.9958	5.55951	68.1453	5.05446	0	3
4.66626	2.08948	0.893864	42.0496	154.872	0	3
6.03877	25.813	11.0426	55.2281	24.4067	0	3
6.08705	11.2057	4.7937	57.2187	66.2302	0	3
5.09551	4.29812	1.8387	53.9204	103.639	0	3
4.42446	2.16187	0.924832	38.759	150.405	0	3
4.2697	2.40764	1.02997	38.4778	166.623	0	3
4.65546	1.85882	0.795191	41.0571	122.227	0	3
5.84818	7.85919	3.3621	111.696	37.2839	0	3
4.13006	2.8589	1.22301	45.2712	200.616	0	3
5.23288	2.25079	0.962871	42.3087	118.004	0	3
4.45486	1.47019	0.628935	35.4889	183.589	0	3
3.98867	2.38026	1.01826	31.6359	213.208	0	3
5.3401	2.61456	1.11849	45.9702	125.153	0	3
6.03978	2.81989	1.20633	51.8033	135.756	0	3
4.54754	20.5739	8.80138	57.8486	9.86	0	3
3.88864	0.931818	0.398625	39.0295	202.042	0	3
4.03141	1.2548	0.536794	51.5009	185.241	0	3
5.64502	2.61327	1.11794	45.9598	133.28	0	3
4.36559	3.10753	1.32938	40.5634	178.396	0	3
4.3763	2.83784	1.21401	40.8649	160.783	0	3
6.80294	2.16646	0.926796	52.3696	99.301	0	3
5.36316	2.12947	0.910973	44.0189	109.909	0	3
6.47538	39.414	16.861	75.0043	7.48	0	3
3.77542	0.968927	0.414499	48.2203	211.217	0	3
6.52853	4.77027	2.04069	66.2763	69.0736	0	3
6.53994	7.53857	3.22494	55.7466	54.1465	0	3
4.34783	2.67194	1.14303	35.5086	205.327	0	3
4.18333	3.19833	1.36822	39.1583	198.279	0	3
3.72351	1.09819	0.469798	49.0724	206.219	0	3
3.8855	1.26972	0.543177	45.0509	217.751	0	3
5.72925	2.84291	1.21618	45.2005	120.999	0	3
4.43383	3.35334	1.43453	38.2074	183.503	0	3
4.57386	2.01364	0.861418	38.6466	199.388	0	3
4.23856	2.47018	1.05672	37.3024	188.641	0	3
6.19955	3.25	1.39033	50.5964	94.7643	0	3
4.41392	3.47089	1.48482	38.7291	191.299	0	3
3.99587	1.21488	0.519715	49.4711	127.761	0	3
4.65909	2.2619	0.967626	39.4946	169.188	0	3
4.54606	2.12061	0.907181	36.2021	185.66	0	3
4.40836	2.15756	0.922986	36.2315	153.275	0	3
6.10731	4.46345	1.90943	55.0855	79.9109	0	3
8.30975	19.5741	8.37365	75.0053	35.1847	0	3
5.62078	3.801	1.62604	42.8573	97.243	0	3
3.98571	1.42619	0.610113	51.3	144.679	0	3
6.60631	4.97029	2.12625	52.6425	82.9279	0	3
4.51451	2.19219	0.937803	37.044	176.23	0	3
4.47936	2.88549	1.23439	39.6192	164.897	0	3
6.20415	3.38923	1.44989	50.0236	88.4693	0	3
5.02371	2.87938	1.23178	44.7629	125.069	0	3
5.74215	4.23822	1.81308	51.805	99.5614	0	3
5.47769	23.6759	10.1284	60.1102	6.8	0	3
6.16873	9.18576	3.9296	58.3065	51.8152	0	3
6.68676	10.0343	4.29259	71.9007	63.3715	0	3
4.42285	2.0549	0.879069	37.4644	177.902	0	3
5.96594	24.6548	10.5471	64.5031	17.7973	0	3
4.75728	3.70485	1.58491	49.1767	118.481	0	3
4.07138	1.48718	0.636204	50.7838	210.438	0	3
4.89138	1.93388	0.827301	43.2834	147.647	0	3
6.5738	12.3181	5.26958	57.1497	40.133	0	3
5.50736	7.77723	3.32704	55.1119	72.4487	0	3
4.84858	2.67102	1.14264	47.7037	138.582	0	3
4.3375	2.25714	0.965589	38.5518	180.626	0	3
5.82667	12.7673	5.46174	60.6909	62.0144	0	3
5.02397	4.86166	2.07978	96.6253	39.4312	0	3
5.48808	4.15096	1.77575	53.8263	95.5787	0	3
3.62204	0.892608	0.381851	56.0669	171.278	0	3
5.19441	3.85332	1.64842	48.9965	119.89	0	3
5.65085	7.81243	3.3421	63.4508	81.3574	0	3
5.20162	3.89919	1.66804	45.1043	106.317	0	3
4.69393	2.95119	1.2625	45.5726	142.463	0	3
4.98486	3.32432	1.42212	46.307	127.476	0	3
3.99703	2.64636	1.13209	37.9123	173.463	0	3
4.41361	2.65445	1.13555	43.5105	185.301	0	3
4.50286	2.37714	1.01692	39.0343	147.884	0	3
4.84393	1.91908	0.820966	50.5861	156.971	0	3
5.15086	1.80603	0.772608	52.3405	158.793	0	3
5.74973	8.71686	3.72901	59.4433	79.456	0	3
5.25207	4.28202	1.83182	55.9298	114.838	0	3
4.89269	2.63431	1.12694	42.7321	138.574	0	3
6.25866	16.3483	6.99366	59.6458	33.744	0	3
6.02884	28.7841	12.3136	65.1044	22.1392	0	3
5.55604	14.7147	6.29484	63.4571	58.1718	0	3
4.33087	2.50369	1.07106	38.7991	203.542	0	3
4.46163	1.96812	0.841948	38.0378	142.762	0	3
4.55137	3.35311	1.43444	49.2098	129.444	0	3
4.67202	1.69725	0.72607	42.9438	180.153	0	3
5.69931	16.9352	7.24474	67.7159	66.252	0	3
4.21078	1.36766	0.585075	71.6718	118.379	0	3
5.7942	15.9802	6.83621	65.7533	42.8832	0	3
5.34509	3.43955	1.47141	55.7733	101.842	0	3
4.45726	2.49252	1.06628	44.3451	163.82	0	3
5.97219	29.6567	12.6869	60.4492	28.7798	0	3
4.22233	2.0932	0.895457	39.9689	152.184	0	3
5.38102	6.60935	2.82743	56.2091	92.2021	0	3
3.97196	1.12967	0.483265	69.4311	184.079	0	3
4.78947	3.32687	1.42321	52.6939	126.232	0	3
4.58605	3.73591	1.59819	56.7641	112.266	0	3
4.49156	2.01687	0.862803	45.7064	195.972	0	3
4.41205	1.53629	0.657211	48.0566	169.109	0	3
5.76567	15.3679	6.57429	72.9383	49.0355	0	3
3.97505	1.78028	0.76159	70.3366	136.042	0	3
6.07354	8.33524	3.56575	83.1834	68.0306	0	3
4.77528	4.53933	1.94189	53.2451	118.684	0	3
5.00389	3.45266	1.47702	49.4254	158.123	0	3
4.53323	2.20411	0.942903	42.0443	122.107	0	3
4.64921	3.14791	1.34665	45.4215	118.723	0	3
4.71045	23.7331	10.1528	65.3743	14.0885	0	3
4.0446	1.26995	0.543276	46.662	180.312	0	3
7.16785	11.7139	5.01114	64.1087	58.8779	0	3
9.42357	26.7449	11.4413	84.3904	29.8155	0	3
4.93113	37.1894	15.9093	66.561	8.74137	0	3
5.46632	2.23446	0.955883	46.7694	128.7	0	3
4.484	1.324	0.566397	55.836	163.518	0	3
4.34802	3.0226	1.29304	34.7853	213.126	0	3
4.45207	2.51166	1.07447	35.5363	159.086	0	3
4.48686	2.40175	1.02745	36.9061	169.946	0	3
4.10012	1.48196	0.633969	49.5355	148.978	0	3
4.19441	3.41818	1.46227	35.965	208.746	0	3
4.50407	1.37127	0.58662	51.4715	122.553	0	3
5.42794	3.78936	1.62106	43.6707	92.3211	0	3
4.85696	2.37342	1.01533	47.0532	193.837	0	3
4.62416	1.70302	0.728539	36.7685	214.874	0	3
5.69865	4.21216	1.80193	50.2311	82.6193	0	3
4.61832	2.96819	1.26977	37.4746	146.034	0	3
4.47611	1.9654	0.840785	36.7364	155.693	0	3
4.10178	1.83969	0.787007	36.7354	167.871	0	3
5.72054	4.26799	1.82581	48.634	106.935	0	3
6.21975	4.8052	2.05563	54.3126	90.6245	0	3
4.51525	2.84859	1.2186	44.6486	190.862	0	3
4.70119	3.2	1.36894	46.8226	157.719	0	3
4.24855	1.94483	0.831984	50.2195	196.872	0	3
7.18569	38.6204	16.5215	81.6176	27.2531	0	3
6.32611	14.5884	6.24079	68.61	66.8513	0	3
5.74392	6.77057	2.8964	63.2897	93.6482	0	3
5.59121	4.15385	1.77698	55.5835	106.97	0	3
4.49722	3.43048	1.46753	91.6719	55.4773	0	3
4.52819	2.48792	1.06431	37.8964	203.239	0	3
6.30604	28.6823	12.2701	71.9084	44.5296	0	3
5.06397	2.41769	1.03427	49.2719	173.57	0	3
5.19087	2.84647	1.2177	61.3693	137.135	0	3
5.44215	8.76446	3.74937	63.4504	78.0824	0	3
6.70249	23.5911	10.0921	75.9489	41.4256	0	3
5.56265	7.47782	3.19896	63.0498	61.8837	0	3
5.29093	11.0095	4.70977	66.525	50.7967	0	3
6.23394	18.2982	7.82782	70.8255	30.4485	0	3
4.80671	1.94507	0.832085	54.5025	154.357	0	3
5.83654	6.02284	2.57652	70.7224	98.8237	0	3
7.33681	31.8866	13.6408	78.8391	6.67994	0	3
5.16828	2.93312	1.25477	50.6311	177.977	0	3
4.52744	2.64123	1.1299	36.1071	111.637	0	3
5.93486	11.5383	4.93599	57.232	67.3002	0	3
5.21241	2.46062	1.05263	64.9308	86.8332	0	3
5.94516	3.40373	1.45609	48.86	102.159	0	3
7.04404	19.215	8.22004	66.4767	49.1356	0	3
7.66255	21.0371	8.9995	69.0692	26.52	0	3
4.07263	1.4581	0.623764	30.1844	205.196	0	3
4.55482	2.55388	1.09253	37.897	205.131	0	3
6.28361	8.05709	3.44676	77.0276	17.3533	0	3
6.57751	3.14083	1.34362	56.6539	61.2604	0	3
4.7644	1.94895	0.833747	40.449	168.651	0	3
4.55292	3.41504	1.46093	40.1142	159.759	0	3
4.62731	2.78967	1.1934	39.1956	192.004	0	3
4.8337	2.33481	0.998815	43.8226	149.003	0	3
6.64797	24.7267	10.5779	62.4153	14.9368	0	3
5.72181	3.32353	1.42178	46.0404	97.0722	0	3
6.87569	9.46726	4.05002	55.9501	50.2752	0	3
5.41422	4.24041	1.81401	49.6422	119.958	0	3
6.72142	17.6261	7.5403	62.5279	30.2447	0	3
4.31475	2.16725	0.927132	41.5401	191.372	0	3
5.99321	7.42534	3.1765	55.4525	72.5548	0	3
6.42625	11.6755	4.99468	62.5076	50.7523	0	3
4.61048	2.79727	1.19665	44.951	184.109	0	3
4.711	3.176	1.35867	41.613	194.238	0	3
4.02926	0.960106	0.410726	52.6968	161.503	0	3
5.45038	5.01854	2.14689	58.1549	89.7915	0	3
5.48296	11.0129	4.71125	73.1469	56.6618	0	3
4.13075	1.47942	0.632884	63.6332	193.022	0	3
4.31894	1.30731	0.559257	63.0432	121.652	0	3
4.9141	3.43213	1.46824	67.3706	89.2103	0	3
6.46154	27.2049	11.638	76.9474	17.3367	0	3
4.52427	2.23689	0.956926	35.1262	195.864	0	3
5.97219	10.5572	4.5163	59.877	50.3062	0	3
5.21443	27.6026	11.8082	52.5305	15.2735	0	3
5.56459	16.4325	7.02971	67.1732	35.2306	0	3
5.22837	2.29808	0.9831	74.6947	75.023	0	3
4.19924	2.12524	0.90916	33.5066	186.241	0	3
4.68345	17.5126	7.49175	84.786	2.58936	0	3
3.87486	0.908459	0.388632	37.2387	208.546	0	3
8.75147	12.3796	5.29592	60.5372	59.1493	0	3
7.20841	19.7329	8.44157	68.6791	34.0153	0	3
4.0378	2.26289	0.968046	30.768	207.809	0	3
4.23709	0.965583	0.413069	30.3308	199.281	0	3
6.78752	37.9124	16.2186	67.4462	14.62	0	3
5.5309	2.61798	1.11995	51.8315	105.168	0	3
4.47361	2.16262	0.925154	42.4964	189.82	0	3
8.46101	4.06019	1.73692	101.663	41.1175	0	3
5.00726	2.18875	0.93633	41.8421	131.69	0	3
4.61886	3.15245	1.3486	38.2842	182.628	0	3
5.00391	9.49902	4.06361	85.7006	3.06	0	3
8.06438	6.37625	2.72771	68.1144	63.8422	0	3
6.78255	8.66797	3.70809	72.6745	60.1954	0	3
4.64309	2.06752	0.884471	40.8264	115.286	0	3
4.81508	2.50142	1.07009	43.9154	147.327	0	3
5.22653	2.63705	1.12811	45.1126	104.845	0	3
6.1353	4.22177	1.80604	58.9044	84.444	0	3
5.5382	4.36503	1.86732	57.0017	93.9607	0	3
5.85967	9.35695	4.00283	66.3188	75.2077	0	3
6.13538	13.0868	5.59845	67.5479	45.3425	0	3
5.05405	4.57838	1.9586	58.0288	99.1874	0	3
4.24675	2.36075	1.00991	37.5599	151.487	0	3
5.50717	5.73403	2.45297	58.2764	64.9462	0	3
5.33835	4.03867	1.72771	59.0838	111.638	0	3
5.48822	3.89921	1.66805	52.8442	99.5248	0	3
6.13028	14.3417	6.13526	71.849	44.4048	0	3
4.60108	4.33548	1.85469	46.0516	174.352	0	3
5.44712	7.0712	3.02501	61.6984	72.9995	0	3
4.76782	2.65227	1.13462	55.1145	146.863	0	3
4.05818	1.04088	0.445281	56.5472	126.701	0	3
4.32633	3.06785	1.3124	64.4265	112.745	0	3
6.0205	17.3512	7.42269	83.738	42.2654	0	3
3.93764	2.51732	1.07689	39.2379	175.887	0	3
6.24662	17.1128	7.32072	67.7218	18.473	0	3
3.91574	1.06652	0.456249	30.1086	194.956	0	3
4.53147	0.98951	0.423305	37.9545	138.923	0	3
6.26547	51.5366	22.0469	66.1204	4.42	0	3
6.52935	49.7556	21.2851	66.81	3.4	0	3
6.66586	2.15923	0.923701	45.1062	105.665	0	3
4.50044	2.08962	0.893923	32.0648	201.292	0	3
7.66457	2.5691	1.09904	55.6935	75.4172	0	3
4.22491	2.33997	1.00102	38.231	205.201	0	3
7.04353	2.16609	0.926639	50.583	94.3572	0	3
4.84576	2.4134	1.03243	39.354	177.403	0	3
4.48428	2.21593	0.947959	48.1719	134.508	0	3
7.59732	3.50503	1.49943	55.4832	76.6698	0	3
4.49586	1.09349	0.467787	52.2071	121.362	0	3
6.62811	11.92	5.09929	58.0659	25.7728	0	3
3.89379	1.19451	0.511003	49.7554	204.707	0	3
4.155	1.74833	0.747924	35.1233	169.714	0	3
4.64614	2.48121	1.06144	40.5501	176.528	0	3
4.74882	2.11532	0.904919	42.0032	163.405	0	3
4.94388	2.70504	1.15719	43.7324	149.484	0	3
6.69933	8.65514	3.7026	64.6916	57.2373	0	3
3.8719	1.11157	0.475521	50.1281	167.202	0	3
5.02154	2.58521	1.10593	45.4691	135.258	0	3
5.71901	5.01033	2.14338	57.6736	86.1248	0	3
4.00459	0.989297	0.423214	52.4465	165.754	0	3
4.8495	1.85323	0.792799	43.1841	183.589	0	3
5.19458	3.47242	1.48547	52.9258	126.605	0	3
6.59064	24.8725	10.6403	66.1251	27.0978	0	3
5.7856	32.482	13.8956	70.7087	15.3754	0	3
4.94118	3.62639	1.55134	53.9952	113.249	0	3
6.62708	51.0482	21.838	69.7799	2.58936	0	3
4.84762	40.4776	17.316	69.2095	7.32382	0	3
4.19048	2.8	1.19782	59.0514	162.26	0	3
4.96771	2.91524	1.24712	47.9021	186.07	0	3
5.1897	5.98855	2.56186	61.3769	95.3026	0	3
4.8992	2.95937	1.266	56.6815	145.237	0	3
5.73018	7.4758	3.19809	68.3193	75.5726	0	3
6.46008	35.6861	15.2662	88.3234	24.6705	0	3
4.80483	3.06036	1.3092	42.2113	196.187	0	3
6.99263	7.97935	3.41351	63.6681	56.4492	0	3
6.46141	22.4485	9.60332	69.566	26.6092	0	3
6.68241	10.8518	4.64231	73.3664	47.6121	0	3
8.8244	6.38895	2.73314	60.4371	70.4613	0	3
4.22481	0.924419	0.395459	33.5775	144.048	0	3
3.83333	0.803922	0.343912	36.1814	134.613	0	3
4.01429	0.933333	0.399273	32.1619	201.292	0	3
3.77404	0.939904	0.402084	34.3053	204.453	0	3
4.01554	0.950777	0.406735	36.101	200.4	0	3
4.9669	0.947991	0.405543	45.1158	123.76	0	3
5.21655	1.03697	0.443609	36.1884	124.754	0	3
4.67166	1.14973	0.491847	46.6193	124.305	0	3
4.625	1.07328	0.459139	44.8233	143.997	0	3
4.03951	1.34815	0.576728	43.7975	193.235	0	3
6.35582	3.00661	1.28621	47.2368	66.4959	0	3
5.63384	3.16366	1.35339	45.2288	112.914	0	3
4.01996	2.47894	1.06047	42.3215	188.811	0	3
5.20863	3.38541	1.44825	47.814	134.15	0	3
7.1698	9.87157	4.22298	61.7582	41.8255	0	3
6.52602	15.9627	6.82871	59.3314	31.3704	0	3
6.28798	6.31176	2.70012	63.2272	67.1377	0	3
5.63991	4.96204	2.12272	59.0499	80.0438	0	3
5.30878	3.34128	1.42937	48.5406	103.186	0	3
6.36247	19.4837	8.33497	59.4417	33.036	0	3
5.81409	4.44957	1.90349	67.6804	92.3249	0	3
6.03464	58.9654	25.2249	61.2689	7.67075	0	3
4.62753	2.88529	1.23431	38.2348	159.841	0	3
5.36017	14.9336	6.38849	71.8686	36.9475	0	3
5.74789	6.74789	2.8867	64.2593	71.6626	0	3
4.40304	2.0076	0.858838	37.6692	147.399	0	3
6.20017	8.0542	3.44552	66.8059	59.6048	0	3
4.52149	2.22063	0.949969	44.5587	143.492	0	3
4.72787	3.34973	1.43299	59.0426	103.192	0	3
4.91441	4.27086	1.82704	53.8418	139.568	0	3
5.38126	1.82714	0.781637	38.5008	108.826	0	3
4.23827	1.95497	0.836322	28.0375	202.329	0	3
4.34673	2.14908	0.91936	37.5997	116.78	0	3
6.05228	8.62548	3.68991	58.1711	42.3624	0	3
5.76089	4.04089	1.72866	51.0871	88.8207	0	3
6.76036	4.81763	2.06095	68.0264	75.2077	0	3
5.3475	10.6913	4.57366	115.643	14.6831	0	3
5.50539	32.0743	13.7211	59.1976	4.42	0	3
6.82222	40.6898	17.4068	64.0907	13.26	0	3
4.26319	1.90625	0.815479	32.5701	215.628	0	3
5.22378	1.69056	0.723208	40.3164	143.372	0	3
5.72798	38.7811	16.5903	57.6904	15.64	0	3
4.29747	1.39873	0.598368	33.557	170.306	0	3
4.09533	2.24299	0.959534	34.5645	164.99	0	3
6.46484	2.73302	1.16916	50.5256	87.5096	0	3
5.03966	3.03786	1.29957	40.2049	162.382	0	3
4.82451	2.88048	1.23225	40.9123	174.898	0	3
4.44246	2.41865	1.03468	37.9702	183.037	0	3
5.46296	1.20085	0.513717	60.6895	101.46	0	3
5.1087	2.74275	1.17333	43.3261	161.624	0	3
4.64137	2.80906	1.20169	37.9204	173.7	0	3
6.35556	9.88571	4.22903	60.2746	51.7515	0	3
7.89303	4.0649	1.73893	61.97	79.2339	0	3
5.77378	3.9653	1.69632	59.7751	97.5871	0	3
5.52353	3.35388	1.43476	51.841	113.077	0	3
5.92611	8.70443	3.72369	62.9286	48.5736	0	3
4.45213	3.00577	1.28584	40.1361	176.964	0	3
6.71896	6.79039	2.90488	73.8224	73.2264	0	3
4.95652	2.89189	1.23713	39.557	123.368	0	3
5.97215	36.7772	15.733	56.0932	19.676	0	3
4.65319	2.15397	0.92145	47.9347	137.163	0	3
5.43195	2.91124	1.24541	50.5754	106.309	0	3
5.14463	4.67252	1.99887	55.968	82.0669	0	3
5.12108	3.62332	1.55003	46.4776	94.4227	0	3
4.81353	2.27343	0.972556	39.9536	183.535	0	3
4.72331	3.01852	1.2913	42.1024	168.248	0	3
5.4854	21.1863	9.06334	54.5871	28.924	0	3
4.2877	1.1754	0.502828	67.9743	130.143	0	3
5.47654	7.09385	3.03469	66.8989	69.2549	0	3
4.38377	1.97387	0.844405	40.608	174.738	0	3
5.63073	7.2965	3.12139	63.0768	83.3943	0	3
5.71249	18.9901	8.12383	59.9416	28.4972	0	3
6.05082	31.5771	13.5085	72.8584	19.1399	0	3
5.75994	49.659	21.2438	66.9021	4.3007	0	3
3.7086	2.15514	0.921951	29.0482	212.366	0	3
7.08294	3.34834	1.43239	67.0664	71.3198	0	3
3.98171	0.800813	0.342582	29.5305	145.728	0	3
7.56753	2.64799	1.13279	66.8333	63.2665	0	3
7.37926	2.46594	1.05491	49.3916	84.2027	0	3
4.73956	1.09214	0.467208	44.3268	131.608	0	3
4.20497	1.81988	0.778529	32.8602	203.32	0	3
4.39928	2.78058	1.18951	37.0803	199.256	0	3
6.09574	12.6466	5.41011	57.182	28.95	0	3
3.97232	1.1476	0.490935	33.3561	197.353	0	3
4.56721	2.73333	1.1693	36.3945	208.096	0	3
6.7019	2.65011	1.1337	50.9873	94.2879	0	3
3.78966	1.00361	0.429335	47.637	209.322	0	3
8.17245	7.50385	3.21009	62.8478	64.4621	0	3
4.76714	2.50272	1.07064	40.0751	125.506	0	3
4.96373	3.66104	1.56616	47.0144	191.457	0	3
4.45349	2.19601	0.939438	38.2309	148.59	0	3
4.52367	3.03156	1.29688	37.3874	202.783	0	3
6.88935	9.30689	3.98142	66.6733	63.2382	0	3
4.13651	1.61513	0.690941	34.6579	197.383	0	3
5.30033	9.45655	4.04544	74.0924	51.0736	0	3
5.09081	6.3855	2.73167	59.126	160.129	0	3
4.694	2.74174	1.17289	41.3537	196.491	0	3
6.19237	19.5563	8.36605	66.8908	38.839	0	3
4.62246	2.39378	1.02404	46.6658	114.895	0	3
6.16942	15.0506	6.43853	76.7063	46.6804	0	3
4.80398	4.88208	2.08852	47.4364	187.691	0	3
7.45367	12.4137	5.3105	62.7268	55.2822	0	3
6.41503	19.9157	8.51979	61.9626	36.6759	0	3
4.5372	3.69345	1.58003	40.2411	153.571	0	3
7.87431	2.98521	1.27705	44.8299	79.6827	0	3
5.10279	5.56088	2.3789	84.8832	32.8536	0	3
4.07955	1.18892	0.508611	34.1989	173.5	0	3
4.20194	2.64466	1.13137	32.433	154.4	0	3
4.40436	2.61745	1.11973	28.5671	198.602	0	3
4.19669	1.47619	0.631503	31.5155	175.315	0	3
4.26965	2.08475	0.891838	48.9461	186.113	0	3
6.87332	3.62399	1.55032	93.3585	34.0611	0	3
4.20561	1.3528	0.578719	39.8575	184.181	0	3
4.62133	2.412	1.03184	40.3507	154.314	0	3
4.95799	3.56233	1.52394	38.477	172.38	0	3
6.39573	30.6322	13.1042	68.3191	17	0	3
5.21059	3.05788	1.30814	42.1626	115.003	0	3
4.43497	2.36705	1.01261	39.7442	190.596	0	3
6.04197	3.27496	1.401	47.9465	108.718	0	3
5.39219	2.69145	1.15138	46.2249	117.538	0	3
6.21939	30.48	13.0391	56.7867	21.76	0	3
4.73804	2.37321	1.01524	43.7129	156.187	0	3
5.5595	3.72756	1.59462	52.501	90.6277	0	3
5.5175	3.57551	1.52957	52.6731	96.119	0	3
5.10824	4.95882	2.12135	48.0388	127.405	0	3
5.3511	5.16107	2.20786	51.139	115.029	0	3
6.20417	38.2953	16.3824	58.4391	21.7706	0	3
4.8714	2.67176	1.14296	41.2986	118.164	0	3
5.5056	6.41418	2.74394	64.181	103.705	0	3
5.64113	8.37366	3.58219	63.8401	62.3796	0	3
5.37638	53.1292	22.7282	60.8512	12.016	0	3
4.99639	2.49368	1.06678	47.3538	155.827	0	3
4.91416	2.63099	1.12552	41.4939	165.63	0	3
4.49716	2.41051	1.0312	93.7401	80.2861	0	3
6.18891	37.2025	15.9149	70.8937	20.4707	0	3
4.86516	2.34839	1.00462	39.4394	147.308	0	3
5.29231	3.31282	1.4172	60.4017	65.2322	0	3
6.97332	57.1132	24.4326	67.5262	10.8853	0	3
5.45249	8.3302	3.5636	87.3198	23.6172	0	3
5.3135	1.97388	0.844409	49.5065	132.076	0	3
8.92412	5.02304	2.14882	55.1558	48.7162	0	3
3.8907	1.37312	0.587408	39.0905	183.261	0	3
9.91457	5.25126	2.24645	77.9774	56.5229	0	3
4.33215	1.72647	0.738569	39.5435	151.3	0	3
4.74315	4.34018	1.8567	50.9886	161.16	0	3
4.75721	1.81731	0.77743	39.9219	176.46	0	3
4.03106	1.27743	0.546476	31.2526	181.404	0	3
4.64479	1.23745	0.529372	34.6757	138.225	0	3
5.21656	3.47346	1.48592	52.1975	139.978	0	3
4.82066	1.94932	0.833903	43.6199	123.474	0	3
4.96976	1.67742	0.717587	41.877	126.213	0	3
4.06446	1.30203	0.556997	40.0829	153.912	0	3
4.88805	3.09834	1.32544	40.9274	183.425	0	3
4.45972	1.29666	0.554701	57.7859	104.648	0	3
4.11678	0.980263	0.419349	62.4507	163.985	0	3
5.80382	3.59873	1.53951	51.8382	92.4162	0	3
5.08805	2.43816	1.04302	43.0755	136.924	0	3
4.94906	3.25471	1.39234	39.4695	208.238	0	3
6.44549	4.72919	2.02311	62.4127	78.1275	0	3
4.20032	2.70275	1.15621	37.2084	165.05	0	3
6.17492	22.6623	9.69475	70.6562	42.1298	0	3
5.01047	4.27402	1.8284	41.7317	143.257	0	3
5.74035	30.7591	13.1585	58.4257	32.6063	0	3
5.43849	15.479	6.62181	61.4776	49.3949	0	3
5.10241	3.05321	1.30614	46.9327	151.031	0	3
[truncated: 3,188 more rows]
