# Supplementary material for: The pattern of nodal morphogen signaling is shaped by co-receptor expression
Source: eLife. 2021 May 26;10:e54894. doi: 10.7554/eLife.54894 (PMC8266389; doi:10.7554/eLife.54894)
Supplement: Figure 3—source data 3. — The quantified fluorescence intensities are organized in this table. Each row corresponds to an individual nucleus. The following characteristics were quantified: average GFP pixel intensity (‘GFP’), average pixel intensity for α-pSmad2 staining (‘pSmad2Raw’), α-pSmad2 staining intensity normalized to background (‘pSmad2 Normalized’), average DAPI pixel intensity (‘DAPI’), distance from the embryonic margin in μm (‘marginDist’), GFP staining status (‘GFP_Flag’, 0 denotes a cell host nucleus, one denotes a sensor cell nucleus), and embryo replicate number (‘Embryo Number’). We note that normalized α-pSmad2 staining was used to generate the figure panel. [file elife-54894-fig3-data3.xlsx]

## Sheet: Sheet1
GFP	pSmad2Raw	pSmad2Normalized	DAPI	marginDist	GFP_Flag	EmbryoNumber
19.4894	10.62	4.39045	42.7768	86.3446	1	1
35.695	15.4767	6.39827	41.3417	108.5	1	1
30.2883	5.43919	2.24864	57.5518	138.368	1	1
13.116	2.81547	1.16395	46.4055	151.95	1	1
37.0395	4.65132	1.92292	37.222	199.978	1	1
39.4844	5.16345	2.13464	41.2392	218.232	1	1
25.2609	3.25311	1.34488	31.2842	201.662	1	1
38.0568	43.3088	17.9045	69.5065	66.6955	1	1
32.6279	22.229	9.18977	50.8479	78.2539	1	1
34.5693	15.3718	6.35493	43.9664	116.012	1	1
39.8725	6.14286	2.53954	35.6544	175.121	1	1
43.2259	3.42348	1.41531	45.578	217.212	1	1
11.327	3.68768	1.52454	45.1114	119.192	1	1
46.8348	7.58439	3.13549	30.4628	213.855	1	1
43.3097	3.94562	1.63117	31.9366	214.857	1	1
10.3246	3.26308	1.349	52.6	133.198	1	1
7.50153	2.51529	1.03986	36.6116	145.991	1	1
37.574	5.04991	2.0877	32.0873	190.798	1	1
33.762	8.46742	3.50055	38.5581	200.853	1	1
11.4919	3.58409	1.48171	29.4665	211.846	1	1
9.92114	3.00315	1.24155	40.8722	76.2601	1	1
47.7495	5.72958	2.36869	34.7332	196.823	1	1
26.6863	5.0134	2.07261	32.3941	192.605	1	1
6.33121	4.27229	1.76622	31.4475	203.518	1	1
15.2618	1.51124	0.624766	25.973	216.495	1	1
13.2276	3.90228	1.61325	39.3133	143.546	1	1
25.2764	19.1983	7.93685	35.5464	125.658	1	1
8.05032	4.13083	1.70774	42.5846	157.396	1	1
10.7992	2.14927	0.888539	30.1321	172.613	1	1
10.2268	3.11791	1.28899	32.5918	200.443	1	1
13.1781	3.00327	1.24159	34.7892	216.681	1	1
8.6798	2.75123	1.1374	29.6256	219.247	1	1
28.0017	91.059	37.6451	76.1285	20.2436	1	1
21.2935	84.4793	34.9249	64.2786	32.5158	1	1
10.3429	3.83286	1.58456	54.9271	71.2817	1	1
34.1276	21.1564	8.74634	34.6008	113.92	1	1
2.74296	3.54409	1.46518	83.364	24.8782	0	1
2.76895	3.04898	1.26049	78.2597	27.0658	0	1
3.08196	4.13151	1.70802	71.9174	34.6083	0	1
3.38804	4.0837	1.68826	80.5978	39.4766	0	1
3.74099	3.48785	1.44192	93.513	35.44	0	1
3.63487	3.53946	1.46326	91.5491	36.4038	0	1
3.42933	2.74499	1.13482	71.5312	50.4405	0	1
3.21824	3.6873	1.52438	86.9055	50.5778	0	1
3.47414	5.2773	2.18171	79.9167	56.9457	0	1
3.34553	2.96173	1.22442	74.8829	61.9146	0	1
3.04689	2.2263	0.920383	74.0051	62.0898	0	1
3.77082	3.39654	1.40418	81.573	51.8252	0	1
3.14888	2.26675	0.937105	86.598	67.619	0	1
3.17285	2.40403	0.993859	74.3054	71.4178	0	1
3.4669	5.24739	2.16934	67.7364	67.0973	0	1
3.24694	2.38529	0.986111	60.007	51.8876	0	1
3.20772	3.63051	1.5009	76.6636	59.0123	0	1
3.21507	2.13787	0.883824	57.6085	76.8987	0	1
3.41681	4.28196	1.77022	77.7968	63.2309	0	1
3.47887	5.12292	2.11789	66.6146	63.92	0	1
3.6094	2.65802	1.09886	56.0778	79.3009	0	1
3.06932	3.56785	1.475	61.5531	82.0838	0	1
3.51025	3.54303	1.46474	56.7131	68.0883	0	1
3.29919	1.99512	0.824811	55.9463	88.1761	0	1
3.42553	3.3844	1.39916	68.705	75.8017	0	1
3.08055	2.45105	1.0133	66.0012	83.96	0	1
2.91404	3.07508	1.27128	64.2405	80.1687	0	1
3.03888	2.55508	1.0563	54.8963	76.4668	0	1
3.12634	1.64382	0.679577	53	81.2835	0	1
3.15965	3.41228	1.41068	60.507	88.4346	0	1
3.75	3.65486	1.51097	68.1498	67.8272	0	1
3.52545	2.66018	1.09975	52.5449	90.7214	0	1
3.49258	2.41098	0.996732	57.5015	98.624	0	1
3.25849	2.73264	1.12971	52.7533	103.221	0	1
3.74196	4.36677	1.80528	60.2029	80.1888	0	1
3.23288	2.27854	0.941979	48.4368	108.342	0	1
2.94802	2.65099	1.09596	62.2673	96.1208	0	1
3.39831	2.16271	0.894095	50.6831	103.24	0	1
3.06295	2.83777	1.17317	54.1259	98.4504	0	1
3.11599	5.87346	2.42817	54.2127	91.1638	0	1
3.24867	2.90957	1.20286	59.5053	109.593	0	1
3.47378	3.16958	1.31035	52.6748	89.5382	0	1
3.22171	3.42725	1.41687	48.3764	107.124	0	1
3.46987	4.3099	1.78177	50.6901	90.4994	0	1
3.38291	3.01197	1.24519	51.7214	115.089	0	1
3.71409	2.88006	1.19065	57.947	113.742	0	1
3.23974	2.21182	0.914398	54.3662	110.508	0	1
3.42007	2.2534	0.931587	42.3912	115.509	0	1
3.0531	2.63496	1.08933	48.0796	94.0517	0	1
3.6778	3.34202	1.38164	66.7333	121.035	0	1
3.65206	2.79639	1.15607	60.5773	112.701	0	1
3.80972	3.41802	1.41305	65.5759	125.04	0	1
3.30798	2.03992	0.843333	53.7262	127.692	0	1
3.34386	1.66316	0.687572	59.9649	104.235	0	1
3.68549	3.20924	1.32674	47.656	124.209	0	1
3.4459	3.61593	1.49488	45.3317	111.779	0	1
3.61207	2.8204	1.16599	50.7026	128.652	0	1
3.25529	2.48187	1.02604	56.0831	113.22	0	1
3.25065	1.88243	0.778222	36.8049	119.561	0	1
3.35387	2.33275	0.964389	41.5563	112.571	0	1
3.3278	1.99378	0.824254	44.8361	107.071	0	1
3.29297	2.39611	0.990586	45.2661	114.823	0	1
3.45382	3.29719	1.3631	63.1968	125.287	0	1
3.46536	2.82771	1.16901	41.3659	116.731	0	1
3.23816	2.40054	0.992417	54.6942	121.777	0	1
3.27863	1.98378	0.820121	49.0639	137.095	0	1
3.37947	2.23173	0.922626	51.1944	128.694	0	1
3.59897	2.69191	1.11287	41.4045	134.202	0	1
3.393	2.46296	1.01822	43.6317	123.45	0	1
3.19543	2.79569	1.15577	64.4949	132.45	0	1
3.69521	2.38752	0.987033	47.9768	141.891	0	1
3.4259	1.8785	0.7766	43.47	131.908	0	1
3.17742	2.74194	1.13355	42.1855	128.877	0	1
3.31845	4.23495	1.75079	56.5417	128.209	0	1
3.03571	1.23626	0.511088	67.4615	137.094	0	1
3.56826	3.11567	1.28806	39.0888	135.054	0	1
3.45977	1.96552	0.812572	43.133	144.688	0	1
3.16837	3.12299	1.29109	60.713	139.874	0	1
3.51423	2.03862	0.842793	46.6402	142.928	0	1
3.51392	3.17345	1.31195	56.3308	159.867	0	1
3.311	3.07332	1.27055	47.3641	148.92	0	1
3.33697	1.75853	0.726999	35.8595	154.682	0	1
3.66263	3.58999	1.48415	39.7563	154.918	0	1
3.27467	2.2023	0.910462	37.4046	141.239	0	1
3.47235	2.28849	0.946093	41.8879	147.123	0	1
3.40175	2.26842	0.937796	44.0105	149.966	0	1
3.40255	1.97375	0.815974	41.1082	137.988	0	1
3.21772	2.54505	1.05216	35.4234	144.5	0	1
3.12745	2.22059	0.918022	44.3162	146.717	0	1
3.35521	2.10128	0.8687	43.9044	139.55	0	1
3.55742	2.07097	0.856166	52.5135	154.182	0	1
3.72984	2.35078	0.971844	40.9095	157.36	0	1
3.26419	2.38428	0.985694	48.2205	164.824	0	1
3.40783	1.7031	0.704085	34.9201	170.221	0	1
3.1775	1.69596	0.701132	33.2777	153.097	0	1
3.53213	2.3638	0.977228	41.7511	156.066	0	1
3.05775	1.78723	0.738867	62.5866	160.646	0	1
3.06084	2.12801	0.879749	45.2915	168.888	0	1
3.60456	2.14639	0.887346	52.3308	172.616	0	1
3.17202	1.96786	0.813542	36.6295	168.054	0	1
3.21824	3.21498	1.32912	42.1726	178.482	0	1
3.42291	1.81895	0.75198	33.512	165.7	0	1
3.5	2.76645	1.14369	52.6562	180.277	0	1
3.30317	2.34444	0.969225	35.8889	160.714	0	1
3.10714	0.951299	0.39328	65.2468	164.979	0	1
3.33285	2.87299	1.18773	46.4555	166.661	0	1
3.07806	2.20675	0.912301	41.5591	171.789	0	1
3.49838	1.6737	0.691931	37.7208	163.2	0	1
3.43594	1.55408	0.642477	35.2779	175.684	0	1
3.28896	2.74735	1.13579	40.1891	157.292	0	1
3.2549	2.20784	0.912753	39.5255	183.726	0	1
3.31962	2.55854	1.05774	42.6804	178.562	0	1
3.11139	2.08416	0.86162	47.8886	173.36	0	1
3.41513	2.22857	0.921322	35.5227	190.127	0	1
3.28468	2.0973	0.867051	40.3856	184.076	0	1
3.41346	1.97431	0.816208	43.3908	179.715	0	1
3.25144	2.23707	0.924835	35.5503	168.034	0	1
3.27089	1.61095	0.665989	42.4899	174.216	0	1
3.44596	1.66699	0.689157	34.444	183.261	0	1
3.20635	1.63294	0.675078	35.9821	178.587	0	1
3.38153	2.64257	1.09247	41.6439	173.175	0	1
4.0512	2.7536	1.13838	54.792	192.979	0	1
3.34815	1.81667	0.751035	39.1167	182.403	0	1
3.29764	2.11969	0.876307	40.2929	188.371	0	1
3.33162	2.42268	1.00157	37.3282	185.356	0	1
3.22152	2.28956	0.946534	51.5332	191.306	0	1
3.22072	1.48799	0.615155	39.1802	171.926	0	1
3.7296	2.4112	0.996823	44.1344	192.163	0	1
3.06852	1.67222	0.69132	35.8963	196.049	0	1
3.29107	2.76607	1.14353	49.1786	185.425	0	1
3.41335	2.37216	0.980683	35.1648	182.79	0	1
3.41959	1.84795	0.763969	33.1155	183.631	0	1
3.14256	1.32851	0.549225	40.0599	178.587	0	1
3.47531	1.83951	0.760477	43.2315	189.454	0	1
3.50518	3.56131	1.4723	37.4335	195.079	0	1
3.55172	1.64368	0.679519	34.3465	204.412	0	1
3.37321	2.43043	1.00477	48.5345	196.27	0	1
3.404	1.8856	0.779533	38.0744	195.16	0	1
3.33752	1.37522	0.568537	34.3357	191.08	0	1
3.34158	1.81161	0.748944	32.5623	192.441	0	1
3.14572	1.42805	0.590376	37.2532	194.572	0	1
3.39052	1.37745	0.569457	35.817	205.973	0	1
3.3224	2.1612	0.893469	41.9501	207.223	0	1
3.47739	2.74069	1.13304	46.8059	211.057	0	1
3.42841	1.81208	0.749139	57.8792	204.516	0	1
3.37827	2.85212	1.17911	37.0637	199.245	0	1
3.13002	2.02294	0.836313	42.8107	200.265	0	1
3.4898	2.64007	1.09144	52.5399	200.655	0	1
3.32101	1.71092	0.70732	40.7008	206.721	0	1
3.17391	3.23478	1.3373	41.3986	204.178	0	1
3.07724	1.43902	0.594912	39.7642	213.377	0	1
3.06678	1.23539	0.510728	34.3456	210.46	0	1
3.27867	2.90711	1.20184	58.4495	13.9441	0	1
3.44848	4.89177	2.02233	77.7013	11.8025	0	1
3.22462	2.60259	1.07595	59.6674	17.7094	0	1
3.23067	2.891	1.19518	66.7921	23.13	0	1
3.02792	2.49112	1.02986	60.2208	25.3454	0	1
3.01587	4.69841	1.94239	66.0173	22.8712	0	1
3.47713	3.64553	1.50711	77.6102	19.8631	0	1
2.92669	1.14662	0.474027	86.9267	28.6186	0	1
3.38462	4.70582	1.94545	89.5322	32.7267	0	1
3.50051	3.45076	1.42659	79.0081	36.2335	0	1
3.13033	2.45554	1.01515	62.0256	40.143	0	1
3.14598	3.31241	1.3694	58.513	21.7281	0	1
3.48485	2.30653	0.95355	75.8193	35.6108	0	1
3.38825	2.11622	0.874874	71.2286	34.2996	0	1
3.07308	1.25668	0.519531	83.0677	41.676	0	1
3.38451	2.30571	0.953211	64.7269	46.8966	0	1
3.13137	2.49604	1.0319	61.1087	32.1062	0	1
2.84842	2.17614	0.899646	65.1439	29.6503	0	1
3.25221	3.26106	1.34817	74.6549	28.8038	0	1
3.4076	3.40608	1.40812	92.2433	51.3659	0	1
3.43396	3.03774	1.25584	68.5539	47.1424	0	1
3.14039	3.09503	1.27953	71.0583	51.6766	0	1
3.26887	2.96855	1.22724	68.739	55.3365	0	1
3.31294	2.83404	1.17163	66.7757	26.0272	0	1
3.65604	2.56044	1.05852	63.7626	49.2613	0	1
3.0042	1.92717	0.796719	59.1947	56.5055	0	1
3.49014	1.89378	0.782914	102.971	48.3482	0	1
3.55006	4.4626	1.8449	71.4603	47.6121	0	1
3.59184	4.42219	1.8282	79.6008	55.9091	0	1
3.74571	2.78627	1.15188	61.1357	58.6636	0	1
3.33815	2.04191	0.844153	55.039	62.8816	0	1
3.26667	2.83598	1.17243	69.1788	49.3	0	1
3.75233	3.18721	1.31764	72.3017	63.8802	0	1
3.13944	1.92961	0.797729	47.8818	57.6859	0	1
3.26638	2.52008	1.04184	54.0719	49.0932	0	1
3.40193	2.69434	1.11388	59.6233	67.08	0	1
3.04513	1.77672	0.734521	72.4917	57.5243	0	1
3.29574	1.7218	0.711818	49.9298	75.4785	0	1
3.46406	3.78224	1.56363	66.1712	68.8011	0	1
3.53974	2.00331	0.828196	59.495	74.7544	0	1
3.72204	3.50958	1.45091	69.7875	69.6535	0	1
3.65414	2.30977	0.954892	56.9579	83.5771	0	1
3.48364	2.46942	1.02089	62.1266	82.2301	0	1
3.30486	2.07096	0.856163	53.5401	84.6218	0	1
3.51748	2.98402	1.23363	69.5045	76.9603	0	1
3.42876	3.21503	1.32914	65.3549	80.2112	0	1
3.1844	2.196	0.907855	60.7893	70.0474	0	1
3.32897	1.82804	0.755736	53.4822	87.8885	0	1
3.63922	2.25449	0.932038	62.2365	77.6548	0	1
3.69433	3.25405	1.34527	74.002	96.3857	0	1
3.10714	2.85913	1.182	57.8294	93.4907	0	1
3.97619	2.27706	0.941366	61.5779	92.8206	0	1
3.7868	2.6599	1.09964	60.1827	86.6246	0	1
3.44617	3.09808	1.28079	50.0789	77.4223	0	1
3.44028	2.725	1.12655	54.6708	96.8809	0	1
3.91025	2.73885	1.13228	56.4482	103.49	0	1
3.78975	3.02988	1.2526	53.7364	96.2224	0	1
3.27604	2.83312	1.17125	51.6336	106.133	0	1
3.83708	2.34082	0.967729	55.2622	103.946	0	1
3.11853	1.44407	0.597	76.7312	99.9444	0	1
3.69468	1.5952	0.659476	79.8268	96.9859	0	1
3.65911	2.71093	1.12074	51.413	118.334	0	1
3.33285	2.0407	0.843652	46.7093	117.619	0	1
3.31404	2.35022	0.971612	41.0174	108.003	0	1
4.12563	2.90955	1.20285	63.5126	102.05	0	1
3.3911	1.78689	0.738723	53.3326	118.117	0	1
3.72685	2.62037	1.0833	43.838	132.314	0	1
3.74578	2.61422	1.08076	42.8471	128.456	0	1
3.22303	1.29155	0.533942	52.1516	118.093	0	1
3.5351	1.61101	0.666012	54.666	132.504	0	1
3.29412	1.91929	0.79346	40.6074	125.224	0	1
3.51386	2.66738	1.10273	41.5501	138.393	0	1
3.75097	2.21012	0.913693	47.8418	149.014	0	1
3.58	3.716	1.53625	45.8587	142.744	0	1
3.48	1.3872	0.573488	39.5296	139.037	0	1
3.73828	2.60156	1.07552	42.4284	150.776	0	1
3.58787	2.32636	0.961749	38.8745	140.556	0	1
3.69671	2.20315	0.910811	40.6681	158.22	0	1
3.53598	2.68056	1.10818	47.3396	152.579	0	1
3.43322	1.6633	0.687631	40.5039	149.58	0	1
3.50211	2.52321	1.04313	45.3228	144.578	0	1
4.3266	2.3848	0.985908	55.0178	162.241	0	1
3.76238	2.37294	0.981005	42.1045	150.764	0	1
3.68982	2.58443	1.06844	36.7856	157.42	0	1
3.46275	1.48711	0.61479	50.0716	171.182	0	1
3.35443	2.23953	0.925854	32.1159	150.531	0	1
3.6473	2.83679	1.17277	42.6349	157.832	0	1
3.40609	2.18443	0.903075	37.3316	162.945	0	1
3.58832	2.34918	0.971185	49.4579	161.574	0	1
3.81064	2.48898	1.02898	49.8145	155.971	0	1
3.75852	2.08444	0.861738	42.8207	172.694	0	1
3.45714	1.89748	0.784444	37.1294	153.268	0	1
3.66581	2.24936	0.929915	55.4871	167.698	0	1
3.45788	2.70604	1.11872	34.7683	161.63	0	1
3.65217	2.01812	0.834317	39.3478	169.141	0	1
3.50155	2.31366	0.956501	47.913	168.934	0	1
3.54656	2.31849	0.958495	40.8691	171.077	0	1
3.60647	2.13477	0.882544	40.1415	166.453	0	1
3.32545	1.56364	0.646429	36.9091	180.184	0	1
3.46996	1.43133	0.591732	38.5043	167.348	0	1
3.74735	3.05732	1.26394	49.4268	179.559	0	1
3.58497	3.37745	1.39628	38.4118	175.088	0	1
3.18536	1.61682	0.668417	32.6059	186.777	0	1
3.67347	2.09833	0.867479	39.9276	181.906	0	1
3.55583	1.51456	0.626141	39.8859	176.46	0	1
3.64833	1.76031	0.727738	34.6974	194.786	0	1
3.62016	2.65633	1.09816	51.6357	194.426	0	1
3.38875	1.67263	0.69149	36.4348	180.784	0	1
3.69664	1.6349	0.67589	37.8201	184.28	0	1
3.60266	1.57246	0.650078	35.4795	191.082	0	1
3.51613	2.12258	0.877504	37.4667	195.775	0	1
3.23601	1.13382	0.468737	43.4112	180.08	0	1
3.32567	2.59962	1.07472	31.4176	181.641	0	1
3.50424	1.9983	0.826126	33.3633	188.791	0	1
3.44406	2.08606	0.862405	32.864	194.991	0	1
3.79374	1.85064	0.76508	40.4908	198.634	0	1
3.86985	4.44072	1.83586	37.8544	186.192	0	1
3.58571	1.77857	0.735286	37.0194	205.919	0	1
3.39602	1.78899	0.739593	32.2156	192.454	0	1
3.71935	1.78065	0.736146	33.8918	215.361	0	1
4.20557	2.34047	0.967583	43.5567	205.781	0	1
3.91882	1.91513	0.791741	37.2731	208.141	0	1
3.44168	1.80871	0.747745	33.3033	216.344	0	1
3.52174	1.91546	0.791877	41.4734	204.973	0	1
3.71695	1.92458	0.795646	36.4644	214.059	0	1
3.74257	2.62801	1.08645	37.8105	225.168	0	1
3.40829	2.31579	0.957379	33.1483	210.517	0	1
3.61209	3.25951	1.34753	73.0136	5.5348	0	1
2.95833	1.30177	0.538169	59.7184	4.95047	0	1
4.09051	2.8146	1.16359	118.317	17.0034	0	1
3.4431	2.68777	1.11116	75.207	22.3523	0	1
3.39841	2.91477	1.205	62.3489	20.2778	0	1
3.69645	4.35091	1.79873	79.9569	33.9081	0	1
3.0765	1.90437	0.787293	68.3251	33.043	0	1
2.99507	1.5431	0.63794	60.0099	13.3685	0	1
2.85411	1.1542	0.477163	87.4654	19.0552	0	1
3.47567	2.3595	0.975449	75.157	50.1036	0	1
3.47358	3.57627	1.47848	57.8195	39.6811	0	1
3.41935	2.92547	1.20943	76.871	49.4405	0	1
3.7397	2.73102	1.12904	73.1475	69.5639	0	1
3.3712	2.34214	0.968273	64.7715	78.1002	0	1
3.33971	2.28469	0.944522	66.134	69.2533	0	1
3.18687	1.28283	0.530339	67.4672	60.897	0	1
3.60536	2.83142	1.17055	48.3238	86.6833	0	1
3.61411	3.36929	1.39291	54.9191	88.9748	0	1
3.42764	2.31707	0.95791	55.8537	89.711	0	1
3.51564	3.39374	1.40302	59.0831	85.1563	0	1
2.92548	1.59619	0.659886	53.922	92.0842	0	1
3.39766	1.82456	0.754299	44.2295	114.103	0	1
3.51073	3.69528	1.52768	61.1144	106.893	0	1
4.27397	3.98946	1.6493	63.8156	114.269	0	1
3.52028	2.69371	1.11362	50.8266	119.237	0	1
3.60321	2.54587	1.0525	47.6583	114.92	0	1
3.0674	2.05647	0.850171	34.5701	136.727	0	1
4.06341	4.70833	1.94649	46.7518	127.964	0	1
3.69446	2.19947	0.90929	46.5971	125.004	0	1
4	1.90814	0.788852	50.4781	129.996	0	1
3.52698	2.45079	1.01319	52.9587	139.807	0	1
3.42387	1.71811	0.710289	39.6811	118.121	0	1
3.79227	2.96135	1.22426	42.8696	141.736	0	1
3.54855	1.87264	0.774173	37.6381	139.963	0	1
4.03831	4.15198	1.71649	50.636	145.806	0	1
3.73139	2.14563	0.887033	42.8252	145.419	0	1
3.60552	2.56706	1.06126	37.142	165.765	0	1
3.55966	2.26891	0.937998	38.9748	155.166	0	1
3.97044	2.80788	1.16082	40.2414	183.74	0	1
3.61387	2.76069	1.14131	33.6046	185.125	0	1
3.58097	2.00405	0.828501	33.2935	177.768	0	1
3.61619	2.23538	0.924138	35.3613	197.176	0	1
3.70538	2.06232	0.852593	41.051	189.988	0	1
3.19003	2.45483	1.01486	31.5016	185.867	0	1
3.40295	1.58861	0.656752	35.154	190.995	0	1
3.53442	1.95652	0.808853	37.8895	204.391	0	1
4.04536	2.30178	0.951585	41.1716	214.848	0	1
3.38861	1.02475	0.423647	42.0743	206.861	0	1
3.4697	1.11616	0.461437	37.6313	210.172	0	1
3.19323	4.00423	1.6554	35.8068	208.409	0	1
3.39064	3.18363	1.31615	59.5673	8.66833	0	1
3.42083	2.64167	1.0921	66.4792	15.603	0	1
3.34432	1.83394	0.758178	60.5348	8.68831	0	1
3.78226	4.23733	1.75177	88.3053	49.3457	0	1
3.68301	2.78758	1.15242	74.9755	52.3202	0	1
3.22283	1.90036	0.785636	55.2826	64.5758	0	1
3.27921	3.05841	1.26439	63.1086	64.751	0	1
3.5749	3.41296	1.41096	52.0372	66.8772	0	1
3.70073	2.90876	1.20252	57.604	84.0873	0	1
3.36381	2.32685	0.961951	63.8852	88.1309	0	1
3.53747	3.57106	1.47632	55.7649	76.5264	0	1
3.49926	2.5405	1.05028	57.9234	78.4811	0	1
3.29839	3.3629	1.39027	51.0444	64.4038	0	1
3.57354	2.36805	0.978985	56.43	77.0203	0	1
3.61168	3.38832	1.40078	63.6277	102.274	0	1
3.3795	1.82825	0.755826	61.1136	87.2549	0	1
3.51758	2.85352	1.17968	53.8066	106.142	0	1
3.46822	3.20551	1.3252	45.178	88.98	0	1
3.76012	2.0405	0.84357	57.6324	95.6905	0	1
3.77694	3.21429	1.32883	54.6942	105.81	0	1
3.22273	1.48541	0.614088	74.0323	100.886	0	1
3.69837	5.09647	2.10695	51.7976	117.889	0	1
3.35536	1.89152	0.781981	42.3766	104.505	0	1
3.47784	1.87091	0.773458	39.9788	101.515	0	1
3.59687	2.2849	0.944609	41.6624	117.509	0	1
3.59208	1.76764	0.730767	52.0895	113.442	0	1
3.18519	1.66931	0.690117	51.7275	130.696	0	1
3.50572	3.62897	1.50027	45.0699	126.861	0	1
3.6487	2.84665	1.17685	42.0697	144.067	0	1
3.41202	1.93548	0.800156	42.0557	136.034	0	1
3.5288	2.25393	0.931804	37.9647	158.075	0	1
3.55531	2.63774	1.09048	38.3015	165.841	0	1
3.48694	4.20428	1.73811	36.3444	160.969	0	1
3.63202	2.39917	0.991849	34.3493	178.217	0	1
3.37143	2.25306	0.931446	31.751	176.389	0	1
3.52155	3.01006	1.2444	33.0216	180.888	0	1
3.78189	2.7551	1.139	35.8635	194.43	0	1
3.37775	3.45388	1.42788	36.0351	174.781	0	1
3.61608	3.17906	1.31427	35.4234	197.996	0	1
3.5871	2.37581	0.982191	34.0952	207.198	0	1
3.74321	1.31111	0.542031	36.6247	194.633	0	1
3.59537	2.37963	0.983772	36.3778	193.041	0	1
3.45293	1.39186	0.575413	37.0076	200.053	0	1
3.36517	1.25094	0.517154	30.6742	203.041	0	1
3.25096	1.39464	0.576562	31.9444	202.557	0	1
3.14693	1.1994	0.495849	40.4873	215.302	0	1
3.60364	2.77149	1.14577	59.5986	2.72	0	1
3.73121	4.56792	1.88844	75.711	6.60161	0	1
3.79781	4.03448	1.66791	79.5376	8.3352	0	1
3.40967	3.16412	1.30809	69.6399	11.7386	0	1
3.43433	4.99069	2.06322	76.2141	24.9338	0	1
4.26118	4.72451	1.95318	75.2361	28.4728	0	1
3.22642	1.69811	0.702023	74.97	17.1658	0	1
3.40833	2.21548	0.915908	60.5083	39.2402	0	1
3.09118	3.16891	1.31007	64.0553	40.8694	0	1
3.66502	4.47855	1.85149	66.7178	36.5005	0	1
3.41245	3.35019	1.38502	72.786	58.9447	0	1
3.42584	3.2156	1.32937	70.6774	45.1432	0	1
3.01935	1.32903	0.54944	93.5471	57.5816	0	1
3.50422	1.94304	0.803279	65.7932	74.6345	0	1
3.49375	2.09687	0.866877	50.0187	81.9915	0	1
3.29825	1.67018	0.690473	56.0596	71.7907	0	1
3.83951	2.39918	0.991853	84.0206	84.0371	0	1
3.32887	2.01226	0.831897	52.4883	86.9669	0	1
3.23936	3.1266	1.29258	46.8085	90.4745	0	1
3.41035	2.07323	0.857103	41.9848	104.444	0	1
3.46429	2.55804	1.05753	47.4524	100.321	0	1
3.69585	1.90783	0.788725	54.8848	96.3497	0	1
3.95894	4.77566	1.97432	62.6422	109.786	0	1
3.54534	3.7513	1.55084	48.9041	118.399	0	1
3.15026	1.59585	0.659748	49.4378	128.059	0	1
3.94315	4.323	1.78719	52.5271	132.44	0	1
3.63108	2.54324	1.05141	41.0946	139.936	0	1
3.33333	3.07214	1.27006	35.4378	137.091	0	1
3.45369	2.60283	1.07604	34.9403	153.023	0	1
3.58442	2.15368	0.890361	37.1861	164.765	0	1
3.24693	1.19236	0.492938	39.0205	158.747	0	1
3.51613	1.75576	0.725855	30.318	171.443	0	1
3.40125	1.71787	0.71019	40.0815	201.925	0	1
3.59589	1.66438	0.688079	31.7671	216.747	0	1
3.70766	6.16073	2.54693	75.1737	4.6245	0	1
3.45045	4.86336	2.01058	57.0015	4.08	0	1
3.07862	3.77201	1.5594	56.0425	1.7	0	1
3.2058	4.25967	1.76101	57.326	6.20442	0	1
3.21591	1.26136	0.521465	84.4364	36.4054	0	1
3.28106	4.33896	1.79379	63.1158	10.5455	0	1
3.21777	1.76132	0.728156	74.1324	27.824	0	1
3.27991	1.70085	0.703157	83.1838	34.0578	0	1
2.90431	2.97289	1.22903	56.1563	20.74	0	1
3.36314	1.80474	0.746106	74.4343	42.3488	0	1
3.39037	3.03743	1.25572	63.4955	44.6993	0	1
3.24148	2.38352	0.985381	59.0952	53.4882	0	1
3.33716	3.20947	1.32684	69.1435	48.9234	0	1
3.46294	3.58723	1.48301	63.4162	62.0786	0	1
3.47936	2.28499	0.944648	63.3082	67.3337	0	1
3.48671	2.15337	0.890234	70.0573	67.7727	0	1
3.56585	4.03049	1.66626	57.0085	78.7781	0	1
3.84067	3.90356	1.61379	58.4633	81.5185	0	1
3.55677	3.95852	1.6365	48.2336	74.0498	0	1
3.52218	2.73891	1.1323	46.459	102.566	0	1
3.21436	2.62541	1.08538	46.7116	92.14	0	1
3.58333	3.27436	1.35366	45.4615	111.455	0	1
3.42073	2.39878	0.991689	43.8134	108.769	0	1
3.4143	3.16599	1.30886	50.1997	106.218	0	1
3.73712	3.53464	1.46127	47.0462	117.999	0	1
3.89375	2.25156	0.930827	61.6375	125.653	0	1
2.82218	1.8431	0.761961	45.9916	117.327	0	1
3.29079	1.83553	0.758832	54.8789	139.294	0	1
3.46667	2.26129	0.934848	40.2656	129.457	0	1
3.40835	2.63339	1.08868	36.4301	140.543	0	1
3.90909	1.46838	0.607048	41.6877	149.224	0	1
3.4509	2.6971	1.11502	35.8783	158.18	0	1
3.46718	2.03817	0.842607	46.6809	156.173	0	1
3.20661	1.97934	0.818286	32.7211	170.31	0	1
3.50725	1.80193	0.744944	45.8486	175.649	0	1
3.46977	2.69767	1.11526	32.5372	176.025	0	1
3.34232	1.24798	0.515931	33.938	199.684	0	1
3.54297	2.28516	0.944715	47.7383	205.59	0	1
3.7882	1.3807	0.570799	37.3646	210.528	0	1
3.11333	2.725	1.12655	60.2817	15.7725	0	1
3.69635	2.61644	1.08167	91.7032	10.2057	0	1
3.49849	3.63293	1.5019	80.636	1.83096	0	1
3.06103	2.69953	1.11602	64.5211	21.1484	0	1
3.14846	3.09727	1.28045	70.4454	25.3887	0	1
3.35159	5.41274	2.2377	80.0866	34.0425	0	1
3.5085	3.50386	1.44855	78.0325	34.0764	0	1
3.44567	2.87874	1.19011	67.0504	50.8161	0	1
3.1988	2.77861	1.14872	60.7229	44.1175	0	1
3.26275	4.08964	1.69072	63.0726	32.5158	0	1
3.29068	1.98903	0.822293	60.7879	61.0203	0	1
3.45602	2.87957	1.19045	71.0081	76.7678	0	1
3.70588	2.02489	0.837116	64.4208	83.1173	0	1
3.67166	3.0362	1.25521	65.5293	90.1	0	1
3.40246	1.40246	0.579798	55.5421	87.8181	0	1
3.82594	2.12972	0.880456	66.0131	105.851	0	1
3.78302	4.24371	1.75441	47.7799	109.382	0	1
3.827	3.66878	1.51672	46.3987	107.214	0	1
3.72021	4.89767	2.02476	46.5531	119.117	0	1
4.28406	5.05141	2.08832	52.5077	125.397	0	1
3.5669	3.02289	1.2497	36.8275	161.033	0	1
3.09912	1.11454	0.460765	45.3811	149.384	0	1
3.54457	2.33225	0.964185	37.8606	173.458	0	1
3.53517	1.61468	0.66753	33.1667	198.655	0	1
3.49719	1.11236	0.459865	36.5983	189.44	0	1
3.58896	2.11043	0.87248	51.3804	203.855	0	1
3.52594	1.84615	0.763225	28.4633	220.644	0	1
3.31475	2.51259	1.03874	80.5306	10.9277	0	1
3.1781	3.36204	1.38992	77.6161	4.35412	0	1
3.08911	2.90099	1.19931	73.703	19.2843	0	1
3.04712	3.08639	1.27595	67.8796	17.5026	0	1
2.78109	3.81095	1.5755	62.5124	15.7321	0	1
3.20955	1.41114	0.583385	81.4005	30.0299	0	1
3.07727	2.42273	1.00159	63.7386	43.5532	0	1
2.86957	2.65217	1.09645	54.8239	26.9438	0	1
3.12094	4.53791	1.87603	62.1733	35.6352	0	1
3.31479	6.36884	2.63297	65.2258	44.9546	0	1
3.37759	4.50862	1.86393	59.131	80.4314	0	1
2.78934	1.59645	0.659993	41.6574	77.4432	0	1
3.0905	2.66968	1.10368	43.7285	73.4345	0	1
3.25749	1.78842	0.739359	71.994	89.3521	0	1
3.34747	2.24848	0.929554	51.5313	74.3489	0	1
3.16632	2.31601	0.95747	54.7318	95.4092	0	1
3.41549	3.8257	1.5816	57.3046	93.6285	0	1
3.20455	1.5062	0.622683	57.4897	90.1	0	1
3.50355	5.56738	2.30163	52.3239	85.6024	0	1
3.4289	3.80505	1.57306	41.805	115.552	0	1
3.085	1.79	0.740011	41.31	104.698	0	1
3.63616	4.27232	1.76624	50.1808	121.182	0	1
3.49561	3.55702	1.47052	61.7961	97.0972	0	1
3.18272	4.73827	1.95887	43.1531	126.497	0	1
3.46154	2.33333	0.964632	43.5245	119.388	0	1
3.66792	3.84151	1.58813	55.0962	126.36	0	1
3.3508	3.62187	1.49733	37.3485	113.47	0	1
3.57632	2.13947	0.884488	34.8605	128.379	0	1
4.14122	7.83908	3.24078	74.0985	134.704	0	1
3.82046	3.18919	1.31845	46.7548	135.872	0	1
3.50625	2.34063	0.967646	56.0281	150.685	0	1
3.4801	2.12935	0.880304	43.49	135.903	0	1
3.81818	2.62045	1.08333	37.9182	144.571	0	1
3.18931	1.05491	0.436116	39.3165	147.399	0	1
3.78906	3.15365	1.30376	35.349	158.675	0	1
3.60934	2.23833	0.925356	37.3661	174.113	0	1
3.0535	2.94239	1.21642	33.3827	190.214	0	1
3.24747	2.13384	0.882158	32.3384	193.259	0	1
3.30481	1.7139	0.708551	46.3583	192.943	0	1
3.58161	2.55722	1.05719	38.3171	203.752	0	1
2.96923	1.04359	0.431434	42.8718	212.559	0	1
3.43011	1.58871	0.656794	31.2204	206.282	0	1
3.73047	1.71875	0.710555	43.793	222.473	0	1
7.31105	2.33226	1.314	82.2918	54.0119	1	2
43.0618	64.7373	36.4731	102.564	40.9033	1	2
25.6284	34.177	19.2554	89.5108	50.3074	1	2
22.21	25.245	14.2231	103.495	76.7324	1	2
30.0369	26.6145	14.9946	67.6527	108.784	1	2
32.6881	24.2827	13.6809	58.0146	85.3515	1	2
30.3654	29.3885	16.5575	61.3904	100.599	1	2
39.8962	29.117	16.4046	59.0331	69.0334	1	2
40.4246	38.0086	21.4141	95.3874	41.9869	1	2
27.2637	48.171	27.1396	91.823	63.0019	1	2
22.8604	11.2804	6.35539	73.1813	47.7455	1	2
21.7045	22.1733	12.4924	69.202	87.38	1	2
13.0473	11.1284	6.26973	81.3845	88.0173	1	2
15.7194	18.6236	10.4926	76.4263	74.1746	1	2
25.5841	36.8611	20.7676	82.2944	68.8691	1	2
17.1858	15.8472	8.92831	66.1878	79.1638	1	2
17.9439	13.1389	7.40247	75.1271	64.2825	1	2
22.8763	29.6211	16.6886	89.939	54.8666	1	2
25.8739	22.932	12.9199	93.3748	43.2763	1	2
16.5462	18.0177	10.1512	77.8906	61.9752	1	2
31.7186	21	11.8314	65.9344	94.1475	1	2
25.6436	17.8709	10.0685	77.6456	69.3467	1	2
18.9232	18.0685	10.1798	64.0571	82.3348	1	2
20.2548	18.384	10.3576	67.8698	63.92	1	2
23.28	12.3751	6.97215	61.325	69.6004	1	2
7.67253	1.34725	0.759044	59.7681	99.2224	1	2
7.85515	2.81937	1.58844	80.6387	64.9569	1	2
3.76955	1.65667	0.933371	78.8401	96.9095	0	2
3.66499	2.28212	1.28575	29.8086	193.536	0	2
3.45754	1.70191	0.958856	30.9827	184.031	0	2
3.24908	1.23247	0.694376	69.2897	136.527	0	2
3.66508	2.38242	1.34226	33.5392	165.354	0	2
4.41725	1.16134	0.654298	94.3296	22.4142	0	2
4.15248	2.02128	1.13879	57.8085	125.902	0	2
3.24642	3.8903	2.1918	29.8855	183.587	0	2
3.74359	2	1.1268	38.2509	170.126	0	2
3.92833	1.30603	0.735819	99.7247	67.2796	0	2
3.42904	1.17966	0.664619	51.5734	140.69	0	2
3.66614	2.31804	1.30599	39.2405	157.685	0	2
4.86111	1.62037	0.912919	85.8164	80.6481	0	2
4.2039	1.02837	0.579384	101.66	17.6342	0	2
3.3411	2.3178	1.30585	31.25	187.755	0	2
4.48868	1.42193	0.801118	97.6865	8.3352	0	2
3.3539	2.37338	1.33716	34.8279	174.394	0	2
3.68962	1.81668	1.02352	54.7478	127.817	0	2
2.93865	1.06953	0.602574	34.6319	210.626	0	2
5.31707	0.992495	0.559173	103.334	31.2541	0	2
4.08607	1.96311	1.10602	39.5943	154.384	0	2
3.14739	1.73376	0.9768	28.0475	182.368	0	2
4.74644	1.55102	0.873847	106.37	40.7376	0	2
3.19132	1.83107	1.03163	37.6431	146.701	0	2
3.25676	1.94015	1.09309	33.083	165.667	0	2
3.30277	0.982942	0.553791	48.0896	175.644	0	2
3.61659	1.59417	0.898158	55.3565	125.287	0	2
3.98632	1.45641	0.820543	43.494	153.232	0	2
3.39645	2.55621	1.44017	30.0976	170.484	0	2
4.08828	1.08249	0.609876	126.955	98.8137	0	2
3.9435	1.92279	1.0833	53.1337	139.052	0	2
4.09962	2.10467	1.18577	87.1072	114.342	0	2
3.55296	1.81527	1.02273	65.9495	131.605	0	2
3.63274	1.93805	1.0919	38.4403	163.63	0	2
3.33099	1.01761	0.57332	72.1866	151.224	0	2
4.4039	1.40529	0.791744	95.6253	12.58	0	2
4.32929	1.72231	0.97035	64.2883	119.158	0	2
4.46127	1.51408	0.853037	77.8081	105.06	0	2
3.72595	2.73178	1.53909	36.0496	175.709	0	2
3.73622	1.06955	0.602588	70.0315	141.78	0	2
3.50068	2.26793	1.27775	42.0014	159.8	0	2
3.59903	1.65747	0.933819	41.5211	149.6	0	2
3.90427	1.34282	0.756547	106.142	101.935	0	2
4.35691	1.38264	0.778979	80.7781	19.72	0	2
4.78995	2.21392	1.24732	79.3943	117.434	0	2
4.59174	1.29969	0.732249	120.653	72.5763	0	2
4.71646	1.88481	1.0619	108.062	77.9757	0	2
4.19895	1.08432	0.610908	127.559	24.715	0	2
4.04757	2.07022	1.16636	81.0634	109.946	0	2
3.7305	2.08865	1.17675	49.3097	148.845	0	2
5.09846	3.09653	1.74459	106.176	92.0992	0	2
4.59107	1.74065	0.980685	102.999	40.2078	0	2
4.04578	1.19518	0.673366	122.325	20.6814	0	2
5.8628	3.125	1.76063	111.119	63.6627	0	2
3.59459	1.52526	0.859336	73.1845	116.521	0	2
4.1286	1.29268	0.728299	123.084	17.2732	0	2
4.70929	1.79614	1.01195	92.5368	76.1972	0	2
4.5558	2.05908	1.16009	111.707	27.4643	0	2
3.88478	1.47886	0.833191	86.7611	57.9737	0	2
4.8448	1.87918	1.05873	115.263	13.2032	0	2
3.91783	2.21329	1.24697	52.3601	123.609	0	2
3.99108	2.71556	1.52995	83.219	94.5029	0	2
4.44563	1.94563	1.09617	103.129	69.8524	0	2
4.37134	2.17457	1.22516	113.952	43.8125	0	2
3.29348	2.77391	1.56283	31.1957	188.715	0	2
4.07508	2.07958	1.17164	75.1892	99.9958	0	2
4.99457	2.17775	1.22695	121.346	54.9213	0	2
4.75315	1.7521	0.987136	110.544	19.1399	0	2
4.23874	2.2555	1.27075	108.48	36.5717	0	2
4.58155	2.03075	1.14413	95.9345	76.3427	0	2
4.01639	1.83028	1.03118	84.9797	85.8013	0	2
3.30689	1.14823	0.646912	47.0856	156.137	0	2
4.54102	1.82812	1.02997	114.388	21.5304	0	2
2.88309	2.11511	1.19165	26.4604	181.812	0	2
3.99358	2.33376	1.31484	77.5892	97.1674	0	2
4.44627	2.51888	1.41914	110.198	33.9353	0	2
3.94338	2.3141	1.30377	87.6688	83.6324	0	2
4.30662	2.8072	1.58158	112.956	51.0283	0	2
2.66274	0.974057	0.548785	24.2406	180.781	0	2
4.54953	2.39813	1.35111	108.409	68.1333	0	2
3.04643	1.08571	0.611693	42.2321	157.962	0	2
3.72754	3.71014	2.0903	47.7826	140.262	0	2
3.58058	2.6374	1.48591	72.3233	90.4151	0	2
4.07812	2.75868	1.55424	140.519	30.1068	0	2
3.13968	1.48254	0.835265	22.7841	175.398	0	2
3.81844	2.8403	1.60023	89.9496	74.1364	0	2
4.50633	1.91842	1.08084	87.6878	20.8401	0	2
3.71247	2.75318	1.55115	73.9198	104.114	0	2
4.30941	2.98642	1.68255	98.5403	47.3675	0	2
3.72571	2.74571	1.54694	47.2486	112.419	0	2
3.7337	2.15568	1.21451	73.6557	79.674	0	2
4.06852	2.2721	1.2801	112.555	20.0917	0	2
3.82787	1.20219	0.677313	97.1749	89.5569	0	2
3.67036	2.56735	1.44645	52.2155	114.912	0	2
4.93588	3.11789	1.75662	118.456	29.9991	0	2
3.58981	1.18932	0.670065	87.0243	94.2542	0	2
4.22796	2.35139	1.32477	101.025	59.8786	0	2
4.36719	2.88477	1.62528	84.9492	76.4879	0	2
3.45363	1.11278	0.626943	90.8559	99.3155	0	2
3.74474	2.33174	1.31371	86.2572	66.6305	0	2
4.07547	1.75043	0.986194	96.9391	32.7549	0	2
4.46806	2.23342	1.25831	92.7101	48.6307	0	2
3.3591	1.91646	1.07974	61.7606	120.712	0	2
3.45012	2.63382	1.4839	38.7105	160.833	0	2
4.56481	1.34721	0.759023	97.3233	30.8708	0	2
5.05155	1.46954	0.827941	96.0066	8.944	0	2
3.19055	2.82718	1.59284	26.1521	206.541	0	2
3.86236	1.02192	0.575754	85.3143	58.9143	0	2
3.95979	1.29572	0.73001	76.0208	75.4034	0	2
3.66988	1.43373	0.807768	71.8169	143.992	0	2
3.73007	1.93986	1.09292	59.3455	123.866	0	2
3.87294	2.09412	1.17983	74.8682	120.683	0	2
4.74568	1.6094	0.906741	106.004	55.3543	0	2
4.46629	1.35674	0.76439	100.003	11.6843	0	2
3.67048	2.57506	1.45079	53.7519	143.706	0	2
3.20933	0.972	0.547626	46.7293	165.421	0	2
4.89351	1.57792	0.889003	106.313	5.27822	0	2
3.25705	1.80929	1.01935	37.0398	181.805	0	2
4.48434	1.67745	0.945079	93.0063	3.4	0	2
3.99543	1.26256	0.711326	75.5525	63.24	0	2
4.28475	1.22825	0.691997	84.5548	5.44	0	2
4.0914	2.24839	1.26674	60.7043	130.44	0	2
3.6966	1.52903	0.861455	78.1314	87.5545	0	2
3.96454	1.57092	0.885059	79.9504	99.4499	0	2
4.45654	1.73333	0.976562	97.1173	9.86586	0	2
3.82744	1.90782	1.07487	79.3119	85.8532	0	2
4.41018	1.67309	0.942622	87.3022	72.8561	0	2
3.69131	2.27972	1.2844	55.1568	132.93	0	2
3.97059	1.69945	0.957471	97.1075	47.0885	0	2
3.08696	2.12238	1.19575	42.256	167.866	0	2
4.12624	1.79711	1.0125	88.7394	79.4357	0	2
3.54674	2.52266	1.42127	56.5595	123.923	0	2
4.32381	1.8219	1.02646	109.278	27.7928	0	2
4.52407	2.32315	1.30886	103.532	4.86806	0	2
4.31357	2.16181	1.21797	110.597	51.4379	0	2
4.08083	2.06955	1.16599	101.961	61.5287	0	2
4.78173	2.11269	1.19029	125.887	6.77445	0	2
4.11297	2.09308	1.17924	100.872	16.5765	0	2
3.20956	2.15809	1.21587	27.8934	151.368	0	2
4.68996	2.58154	1.45444	101.112	7.14809	0	2
3.01327	1.76939	0.996875	29.2459	151.386	0	2
3.67249	2.23026	1.25653	83.5162	65.8021	0	2
2.79898	0.872774	0.491722	29.1908	169.867	0	2
3.99022	2.33757	1.31699	104.58	51.8252	0	2
3.34747	2.59495	1.462	56.8848	106.871	0	2
3.82609	2.36317	1.33141	92.6019	46.0496	0	2
4.17928	2.53243	1.42678	111.373	9.90095	0	2
4.18689	2.07459	1.16883	96.441	18.8968	0	2
3.63709	2.31107	1.30206	86.0658	60.5544	0	2
3.9453	1.15967	0.653359	80.7746	44.2	0	2
3.24447	1.61769	0.911406	31.7347	173.74	0	2
3.21461	2.03279	1.14527	29.693	169.352	0	2
4.00122	2.13973	1.20553	77.5067	111.406	0	2
3.90337	1.36442	0.768718	75.9447	79.7088	0	2
4.09786	1.04434	0.588384	100.311	27.2276	0	2
3.75912	1.71017	0.963513	72.2898	102.953	0	2
4.1585	1.01585	0.572331	93.9986	34.1442	0	2
3.15313	0.96875	0.545795	54.7	129.419	0	2
3.10456	1.06434	0.599652	31.6381	196.838	0	2
3.57264	1.03808	0.584857	60.9041	109.618	0	2
3.41854	1.59046	0.896067	63.8515	118.626	0	2
3.57875	1.10115	0.620391	60.4661	106.605	0	2
3.06835	1.16906	0.658653	29.7032	172.846	0	2
3.43154	1.8508	1.04274	63.0123	128.145	0	2
3.17973	0.928378	0.52305	45.4311	163.485	0	2
3.58411	1.53154	0.862873	58.3843	113.9	0	2
3.63987	1.62555	0.915837	49.3117	140.186	0	2
3.59059	1.74129	0.981045	56.0383	122.688	0	2
4.04894	1.51713	0.854752	85.6117	51.1946	0	2
3.64244	1.73934	0.979947	62.9341	104.727	0	2
4.09708	1.36221	0.767472	106.398	37.1908	0	2
4.52182	1.83615	1.03449	102.805	60.1502	0	2
3.33088	2.03046	1.14396	49.7689	130.014	0	2
3.75042	2.07841	1.17098	92.2175	38.0086	0	2
2.98224	1.29065	0.727156	25.9776	171.768	0	2
3.23759	1.8026	1.01559	38.0733	147.907	0	2
3.34983	0.807481	0.454936	68.5776	116.628	0	2
3.15217	2.63315	1.48352	27.4864	175.614	0	2
3.30047	1.62338	0.914612	32.8831	159.978	0	2
3.772	1.132	0.63777	54.4507	129.039	0	2
3.15213	0.939597	0.52937	24.3624	187.717	0	2
3.2191	2.11517	1.19169	49.9176	135.115	0	2
3.02727	1.64318	0.925771	23.8038	210.772	0	2
3.4875	1.49375	0.841581	65.8187	117.71	0	2
3.29333	1.51407	0.853031	42.2726	141.323	0	2
3.00983	1.0618	0.598218	28.2093	202.695	0	2
4.52517	1.5551	0.876146	97.3918	9.18	0	2
3.32425	1.75466	0.988579	33.9527	158.429	0	2
3.75688	1.51375	0.852851	77.9565	104.72	0	2
3.5449	0.866801	0.488357	93.3431	91.5838	0	2
3.64071	1.48405	0.836117	90.6951	78.629	0	2
3.90562	1.24492	0.701391	82.8387	27.5736	0	2
3.56129	1.37849	0.776646	49.314	143.498	0	2
3.67907	1.52791	0.860825	62.1605	109.597	0	2
3.47556	1.99911	1.1263	56.9733	97.3879	0	2
4.20492	1.71414	0.965748	94.9385	20.0398	0	2
3.25247	1.39744	0.787317	53.0858	117.201	0	2
2.93929	1.00357	0.565413	29.0821	200.544	0	2
3.39021	2.45922	1.38553	50.4893	126.019	0	2
3.66112	2.11734	1.19291	70.5236	95.647	0	2
4.09132	2.19168	1.2348	100.71	43.7875	0	2
3.69102	2.09395	1.17973	70.0438	101.875	0	2
3.65349	1.6685	0.940033	78.6253	76.9392	0	2
3.98671	1.59256	0.89725	94.9274	60.2251	0	2
2.7861	0.903743	0.50917	24.7995	192.792	0	2
3.46044	2.32527	1.31006	79.4505	94.1106	0	2
3.88105	1.74427	0.982721	98.3611	48.4139	0	2
4.19459	1.96785	1.10869	85.6244	34.3467	0	2
3.75044	1.81883	1.02473	89.6465	55.9721	0	2
3.5411	1.53006	0.862038	81.6491	33.9132	0	2
3.45996	2.08808	1.17643	55.8959	94.1162	0	2
4.24027	2.26058	1.27361	94.5008	4.72343	0	2
4.36883	1.71076	0.963846	105.929	9.7894	0	2
3.73065	2.02449	1.1406	89.6919	37.3211	0	2
4.20103	2.51487	1.41688	99.5128	13.3339	0	2
4.04162	1.5401	0.867695	83.4802	3.04105	0	2
3.5489	2.28187	1.28561	78.3181	56.9842	0	2
4.17891	2.03514	1.1466	94.3858	3.04105	0	2
3.53854	1.63926	0.923561	65.5951	106.506	0	2
3.90011	1.38384	0.779656	85.9214	63.3842	0	2
4.0694	1.36566	0.769414	91.7198	26.1469	0	2
3.30703	0.713933	0.402231	65.0666	131.461	0	2
3.05255	2.17994	1.22818	24.5064	202.453	0	2
3.52701	0.941566	0.530479	61.6582	92.2178	0	2
3.11778	2.02492	1.14084	30.3647	166.65	0	2
3.26975	1.45824	0.821574	50.8623	130.455	0	2
3.68158	1.3012	0.7331	91.9742	16.7431	0	2
3.90517	1.25259	0.705709	74.7759	98.8248	0	2
3.16729	3.42255	1.92827	27.5465	170.614	0	2
3.39638	1.72879	0.974002	51.5661	125.8	0	2
4.19378	1.62756	0.916967	93.6116	67.7829	0	2
2.89873	1.05063	0.591928	22.7722	207.704	0	2
3.2224	1.4288	0.804988	34.1328	155.276	0	2
2.87543	1.78201	1.00398	29.0744	156.929	0	2
2.79221	1.1013	0.620473	22.6623	196.773	0	2
4.10808	1.30932	0.73767	83.791	34.3046	0	2
4.18555	1.83569	1.03423	74.2465	66.7994	0	2
3.41294	2.05765	1.15928	52.3471	128.147	0	2
3.44415	1.45992	0.822521	66.2891	87.6204	0	2
3.73524	1.2952	0.729719	121.781	48.9234	0	2
4.02061	2.38286	1.34251	114.693	24.4824	0	2
3.35893	2.21881	1.25008	56.572	107.597	0	2
3.77871	2.06785	1.16503	110.03	35.7324	0	2
3.68211	2.12352	1.1964	75.2434	79.5258	0	2
4.641	1.97155	1.11077	105.901	9.12316	0	2
3.20704	1.08538	0.611504	77.4184	99.7563	0	2
3.93833	1.51833	0.855431	89.285	65.3163	0	2
4.12928	2.11729	1.19289	93.4803	26.1601	0	2
3.52073	1.10104	0.620325	68.3187	83.1507	0	2
4.21336	2.10749	1.18736	89.1612	13.9897	0	2
3.59106	2.25922	1.27285	80.5341	73.6804	0	2
4.16726	2.47431	1.39403	108.041	18.5728	0	2
3.00791	1.59486	0.898547	24.3498	162.884	0	2
3.57304	1.89255	1.06627	64.1103	68.3772	0	2
2.82892	0.827711	0.466333	33.059	151.395	0	2
3.61417	1.75295	0.987616	62.3583	116.691	0	2
3.59354	1.25166	0.705184	79.1457	71.946	0	2
3.30489	1.21706	0.685695	45.1004	121.102	0	2
3.05322	1.38235	0.778819	33.3389	154.026	0	2
3.28836	1.75843	0.990703	47.3232	144.688	0	2
3.40176	0.750733	0.422964	103.085	128.584	0	2
3.01365	1.62476	0.91539	29.9532	179.385	0	2
3.37869	1.094	0.616362	45.2748	141.573	0	2
3.30201	2.08893	1.1769	36.2819	152.161	0	2
3.79188	0.91269	0.514211	108.368	39.0512	0	2
3.70341	1.82858	1.03023	58.3246	120.654	0	2
3.9275	1.17595	0.662532	77.7675	16.66	0	2
3.56771	1.6625	0.936655	77.9437	98.6879	0	2
3.25734	1.41128	0.795117	45.9542	152.718	0	2
3.19679	0.995984	0.561139	44.741	144.946	0	2
3.79891	1.78125	1.00356	87.7242	37.3598	0	2
3.5209	1.50251	0.846515	79.8462	79.824	0	2
3.71281	1.23466	0.695608	84.8974	70.1488	0	2
4.12566	1.60896	0.906492	100.304	33.8944	0	2
3.85337	1.80572	1.01734	77.9956	64.8607	0	2
3.76564	2.39623	1.35004	92.148	52.6078	0	2
3.27255	0.982906	0.55377	102.076	65.2951	0	2
3.45072	1.90385	1.07263	104.05	13.2774	0	2
2.9319	1.04659	0.589653	27.9857	184.62	0	2
3.06549	2.21159	1.24601	27.6599	196.675	0	2
3.19417	2.35316	1.32577	28.5765	175.585	0	2
2.92231	0.929825	0.523864	28.3108	207.418	0	2
3.22807	0.830409	0.467854	64.2066	116.746	0	2
3.56574	2.1006	1.18348	72.7938	102.345	0	2
4.2753	1.43739	0.809829	78.946	27.3399	0	2
3.36118	0.773779	0.435948	73.9216	124.313	0	2
3.10219	2.35328	1.32584	27.3839	200.302	0	2
3.94597	1.52659	0.860081	83.8482	78.88	0	2
3.06863	1.06275	0.598752	32.9647	162.311	0	2
3.09534	3.02966	1.70691	27.8178	169.914	0	2
3.54637	2.31113	1.30209	73.4393	91.7729	0	2
3.83064	1.25872	0.709166	88.5906	43.2763	0	2
4.12703	1.71578	0.966671	94.1752	24.0825	0	2
2.90857	0.838571	0.472452	25.7371	183.937	0	2
3.35874	1.20894	0.681116	52.726	102.042	0	2
4.08686	1.49946	0.844796	85.1574	18.2241	0	2
3.06372	1.3433	0.756819	38.3732	139.13	0	2
2.90936	0.989599	0.557541	28.4175	192.061	0	2
3.91825	1.45616	0.820403	81.1611	53.077	0	2
4.20511	1.93277	1.08892	87.3796	24.6728	0	2
3.0537	1	0.563401	40.8549	142.33	0	2
3.54406	1.04981	0.591463	105.608	90.5448	0	2
3.59932	1.58744	0.894364	88.0611	54.9013	0	2
3.61631	1.89808	1.06938	88.1511	42.7279	0	2
3.64508	1.709	0.962852	85.8511	46.7435	0	2
3.34038	0.933099	0.525709	75.8592	41.4256	0	2
3.53642	1.6543	0.932037	69.8662	62.0712	0	2
4.03019	2.03585	1.147	91.7717	26.5831	0	2
3.54098	2.28791	1.28901	77.6014	50.9705	0	2
3.9724	2.84191	1.60113	118.847	11.3989	0	2
3.73069	1.62474	0.915383	86.311	30.4504	0	2
3.68129	1.95411	1.10095	80.8103	40.6026	0	2
3.5114	1.14875	0.647208	55.3735	105.741	0	2
3.01965	0.834682	0.470261	43.7618	175.461	0	2
2.8224	1.31694	0.741966	47.0847	150.841	0	2
3.72727	0.909091	0.512183	116.998	67.0843	0	2
3.58696	1.29249	0.728191	80.8172	81.8327	0	2
4.48375	0.858509	0.483685	102.042	46.5552	0	2
2.91713	0.910221	0.51282	51.3702	144.38	0	2
4.49771	1.58168	0.89112	88.3252	57.745	0	2
3.39194	1.13226	0.637916	44.9629	131.095	0	2
3.28808	2.15544	1.21438	40.0922	142.213	0	2
3.59672	1.1468	0.646111	76.1295	98.9166	0	2
2.89418	0.716931	0.40392	27.9815	190.432	0	2
3.47596	1.10817	0.624346	106.239	108.6	0	2
2.98826	2.52055	1.42008	26.2505	188.88	0	2
3.32505	2.10907	1.18825	45.6231	149.94	0	2
3.09615	1.13077	0.637077	51.2269	143.979	0	2
3.53125	1.34625	0.758479	73.225	45.9554	0	2
3.23487	1.26029	0.710049	52.2833	110.914	0	2
3.91327	2.15136	1.21208	96.1854	46.18	0	2
3.20035	1.22474	0.690019	59.6272	96.9721	0	2
3.9121	2.23913	1.26153	95.4433	30.4485	0	2
3.40789	0.866541	0.48821	94.2613	68.395	0	2
3.50578	1.57587	0.887845	67.7507	78.9862	0	2
3.88242	1.39642	0.786743	134.498	20.0917	0	2
3.55355	1.87988	1.05913	68.5305	83.8836	0	2
3.80624	2.02627	1.1416	86.9392	16.9216	0	2
3.15335	1.31572	0.741279	27.0361	196.194	0	2
3.24823	0.77305	0.435537	60.1401	128.039	0	2
3.88634	1.3988	0.788088	89.9721	57.9957	0	2
3.75	0.925725	0.521554	95.9728	62.62	0	2
3.34309	0.668618	0.3767	81.3361	112.478	0	2
3.56693	1.50044	0.845348	69.1312	102.139	0	2
4.71105	1.07324	0.604662	78.996	43.6711	0	2
3.13228	1.86772	1.05227	30.4867	178.532	0	2
3.40234	0.854971	0.481692	54.8035	112.486	0	2
2.97095	1.84855	1.04147	26.0726	179.105	0	2
3.22028	1.65734	0.933749	40.5979	151.083	0	2
3.11528	1.45898	0.821992	35.6238	157.844	0	2
3.30946	0.765043	0.431026	80.8902	116.608	0	2
3.1785	2.03245	1.14509	29.8783	167.186	0	2
2.87529	2.3903	1.3467	21.4573	212.826	0	2
3.5376	1.30329	0.734277	70.9043	97.58	0	2
3.37423	1.14002	0.642291	48.4994	130.56	0	2
3.55586	2.15974	1.2168	64.349	111.52	0	2
2.82985	0.853731	0.480993	31.2537	176.328	0	2
3.98106	0.925158	0.521235	98.7448	45.9453	0	2
3.63304	0.801786	0.451727	86.2089	84.5179	0	2
3.38296	1.74906	0.985425	51.9719	132.27	0	2
3.53125	2.02941	1.14337	58.5689	119.669	0	2
3.08242	2.76786	1.55941	28.6896	191.588	0	2
3.31693	1.53902	0.867083	43.3529	142.017	0	2
3.35247	1.87986	1.05911	46.3763	127.877	0	2
3.95903	2.02731	1.14219	93.5296	36.0737	0	2
3.94101	1.82725	1.02947	83.684	31.998	0	2
3.86154	1.67692	0.944781	84.7527	39.9655	0	2
3.794	1.64957	0.929368	82.7774	55.0506	0	2
4.03096	2.6379	1.4862	94.4343	43.9443	0	2
3.17544	1.20273	0.677619	57.4717	104.141	0	2
3.39701	1.13731	0.640764	113.09	32.8325	0	2
3.31261	0.95064	0.535592	94.6143	61.7285	0	2
4.11304	0.857391	0.483055	92.8835	39.2475	0	2
3.41353	2.59023	1.45934	35.1466	164.375	0	2
3.73527	1.03127	0.58102	111.503	73.554	0	2
3.92078	1.2698	0.715409	79.7208	62.5082	0	2
3.20708	1.12534	0.634018	39.2561	158.872	0	2
4.95608	0.986823	0.555977	85.4612	44.6993	0	2
3.5667	1.61688	0.91095	63.7719	101.488	0	2
3.21647	2.06507	1.16346	28.4595	191.666	0	2
3.25784	2.21282	1.24671	33.2783	167.499	0	2
3.05556	1.99573	1.12439	26.9174	179.168	0	2
3.05714	0.852101	0.480075	45.4227	136.558	0	2
3.15947	2.01661	1.13616	26.6944	210.849	0	2
3.08156	1.62234	0.914029	30.211	188.427	0	2
3.28443	2.2021	1.24066	36.9102	160.331	0	2
3.24302	1.20361	0.678117	43.33	141.705	0	2
3.3139	0.993797	0.559906	44.6266	132.872	0	2
3.45381	1.8203	1.02556	75.2426	108.283	0	2
3.29393	2.02236	1.1394	43.0969	147.861	0	2
3.48939	1.7095	0.963133	62.9989	121.528	0	2
2.91948	0.951311	0.53597	33.0037	208.061	0	2
4.80077	0.87234	0.491478	101.217	62.4018	0	2
3.325	1.70543	0.960844	53.2348	128.764	0	2
3.52463	1.58887	0.895169	62.6627	103.82	0	2
3.3394	1.79974	1.01398	49.8726	140.668	0	2
3.92539	1.45078	0.81737	86.3544	38.3357	0	2
4.17175	1.50395	0.84733	86.5266	49.0826	0	2
3.46372	1.61565	0.910257	48.1406	129.467	0	2
3.65593	1.07119	0.603508	81.839	62.535	0	2
3.33122	0.959788	0.540746	79.8614	84.6081	0	2
3.78833	1.58702	0.894128	90.096	55.9142	0	2
3.49507	2.03834	1.1484	54.9682	113.585	0	2
3.42075	0.915621	0.515862	97.2691	94.386	0	2
3.89154	1.61979	0.912589	81.7235	51.852	0	2
3.63546	1.45106	0.817531	82.8908	35.3812	0	2
3.0102	1.31076	0.738484	29.8896	169.145	0	2
3.9418	1.69312	0.953907	85.7011	24.1424	0	2
3.38136	1.9036	1.07249	62.0222	114.58	0	2
3.2224	1.4128	0.795973	30.392	201.556	0	2
3.29625	2.34543	1.32142	31.7026	188.826	0	2
3.34808	0.966346	0.544441	76.0875	109.525	0	2
3.09107	1.17851	0.663972	29.4827	175.869	0	2
3.13239	2.09326	1.17934	33.5404	185.136	0	2
3.32918	1.27307	0.717248	72.0499	89.5563	0	2
3.11268	1.39319	0.784926	48.3486	147.372	0	2
2.91521	1.39651	0.786795	27.8653	200.801	0	2
3.42906	1.86493	1.0507	49.0863	133.62	0	2
3.08197	1.73323	0.976506	27.0596	207.887	0	2
2.97582	2.76044	1.55524	23.2637	214.831	0	2
3.24441	2.38339	1.3428	31.7316	187.885	0	2
3.46595	1.9319	1.08843	65.8805	125.958	0	2
3.17686	1.37227	0.773139	51.3144	137.66	0	2
3.78586	1.98545	1.1186	84.9563	85	0	2
3.04435	0.959677	0.540683	35.4254	168.64	0	2
3.09406	2.03837	1.14842	36.8379	163.77	0	2
2.95055	2.26374	1.27539	28.6612	182.571	0	2
3.8995	1.89447	1.06735	90.4905	53.289	0	2
3.6359	1.14097	0.642826	111.678	61.8921	0	2
3.60053	1.78915	1.00801	76.0943	75.4187	0	2
3.10108	1.79392	1.01069	28.2414	177.484	0	2
2.98748	1.00156	0.564283	46.6213	133.164	0	2
3.58209	2.11727	1.19287	83.4947	54.452	0	2
3.1227	1.53923	0.867205	29.5384	200.701	0	2
3.61186	1.62458	0.915288	68.9373	116.06	0	2
2.94388	1.32313	0.745453	25.8912	196.008	0	2
3.77968	1.67809	0.945438	78.3097	99.3882	0	2
3.23744	1.73364	0.976734	29.793	198.533	0	2
3.09148	1.97319	1.1117	28.0584	208.247	0	2
3.29369	2.11894	1.19382	30.1116	185.121	0	2
3.69659	1.97159	1.1108	75.5489	107.1	0	2
3.19236	1.95888	1.10364	30.5888	186.494	0	2
3.42529	1.53083	0.862469	56.3051	138.537	0	2
2.92214	0.958637	0.540098	26.837	206.946	0	2
3.07254	2.11528	1.19175	32.9313	170.299	0	2
3.5765	2.28492	1.28733	58.8636	121.229	0	2
2.73359	2.43243	1.37044	27.7027	191.492	0	2
3.39329	2.01982	1.13797	48.8155	138.22	0	2
3.54116	1.55327	0.875114	69.9516	102.941	0	2
3.58273	1.58364	0.892223	77.1336	66.7527	0	2
3.67731	1.25086	0.704733	103.71	67.3621	0	2
3.53333	1.87725	1.05764	70.7217	88.6201	0	2
3.647	1.896	1.06821	78.155	52.4802	0	2
3.59369	1.96154	1.10513	75.1913	61.3227	0	2
3.54802	1.64548	0.927066	71.2669	43.6526	0	2
3.2426	2.07544	1.16931	36.645	184.28	0	2
3.44526	2.33087	1.31322	56.9963	130.274	0	2
3.19054	2.60458	1.46743	39.01	194.226	0	2
3.38545	1.96594	1.10762	37.2508	157.796	0	2
3.13798	1.8	1.01412	34.6527	173.648	0	2
4.13811	0.826029	0.465386	76.1567	96.5516	0	2
2.99717	2.48515	1.40014	33.7355	203.259	0	2
3.32322	2.42876	1.36837	38.1082	169.451	0	2
3.04319	0.943522	0.531581	43.4801	158.723	0	2
3.41815	0.784441	0.441955	72.8541	102.681	0	2
3.57489	1.72896	0.974097	71.9044	84.485	0	2
3.07179	1.30513	0.735311	32.3564	173.167	0	2
3.40304	1.39163	0.784049	67.8061	113.468	0	2
3.04486	1.31215	0.739267	41.7159	157.345	0	2
3.0933	1.51248	0.852135	38.9251	179.604	0	2
3.24005	1.5144	0.853217	52.3813	146.745	0	2
3.28824	1.36471	0.768877	49.8088	126.162	0	2
3.61905	1.68922	0.95171	78.6341	115.642	0	2
3.10166	1.81743	1.02394	32.2261	187.107	0	2
3.27379	2.37775	1.33962	46.0483	154.822	0	2
3.37248	1.11376	0.627495	59.7193	116.358	0	2
3.12447	1.31825	0.742702	44.2093	182.338	0	2
3.51754	1.48496	0.83663	66.8421	94.4252	0	2
3.30889	2.18759	1.23249	53.5035	153.15	0	2
3.34456	1.79632	1.01205	32.3706	177.48	0	2
3.12442	1.80492	1.01689	24.2565	220.755	0	2
3.13893	1.39847	0.787902	45.2229	159.46	0	2
4.04221	1.98593	1.11888	113.55	73.44	0	2
2.9837	1.38043	0.777739	32.5082	194.966	0	2
3.20896	2.05281	1.15656	49.4351	149.548	0	2
3.14499	2.37534	1.33827	30.1463	179.701	0	2
2.90141	0.988732	0.557053	36.5577	202.115	0	2
3.51224	1.34463	0.757568	56.5085	124.602	0	2
3.45378	1.02241	0.576026	80.4202	116.684	0	2
3.26212	2.12975	1.1999	46.557	143.24	0	2
3.84532	2.61194	1.47157	57.3379	131.33	0	2
3.2224	2.38103	1.34147	32.7869	177.376	0	2
3.08333	2.14024	1.20582	28.4512	193.563	0	2
3.43085	1.19415	0.672785	83.8537	106.726	0	2
3.60294	2.36765	1.33394	49.9452	136.393	0	2
3.37175	1.14448	0.644802	55.0909	114.952	0	2
3.10223	0.89777	0.505804	58.3253	150.763	0	2
2.80469	0.882812	0.497378	29.1055	191.527	0	2
2.77	0.686667	0.386869	34.6317	182.528	0	2
3.14318	1.5906	0.896148	73.3289	69.4682	0	2
3.44804	1.51959	0.85614	72.2453	78.8448	0	2
3.33375	1.70486	0.960518	77.0075	67.7496	0	2
2.97292	1.6	0.901442	32.5479	204.681	0	2
3.19231	1.25549	0.707347	39.5165	142.815	0	2
3.12227	1.32314	0.745461	31.9563	171.722	0	2
3.19701	1.41646	0.798035	33.0374	182.354	0	2
3.46512	1.29696	0.730708	68.5814	116.52	0	2
3.30308	1.20205	0.677239	45.8562	125.535	0	2
3.19078	1.95178	1.09964	33.3187	204.453	0	2
3.20782	1.00244	0.564779	47.5941	145.611	0	2
2.9381	1.48333	0.835712	29.8095	194.395	0	2
3.04845	1.37984	0.777406	40.2209	137.234	0	2
3.24792	2.00833	1.1315	42.0167	146.002	0	2
3.00567	1.11048	0.625647	29.2776	177.767	0	2
3.23226	0.959677	0.540683	58.8032	125.878	0	2
3.29843	1.35079	0.761034	32.2618	166.905	0	2
3.3013	1.54545	0.870711	31.7091	161.298	0	2
3.23077	1.36923	0.771426	47.7262	128.414	0	2
3.1009	1.86486	1.05067	34.2937	193.747	0	2
3.54174	1.03407	0.582597	70.4702	82.6207	0	2
2.91587	1.04808	0.590488	25.7981	210.843	0	2
3.07643	2.17038	1.2228	40.3838	174.367	0	2
3.11083	1.07305	0.604557	35.995	147.691	0	2
3.28227	2.22547	1.25383	34.5301	186.303	0	2
3.08091	1.75726	0.990043	28.3465	202.307	0	2
3.15767	1.68683	0.950359	33.1685	165.915	0	2
3.70862	1.17716	0.663211	79.2191	102.793	0	2
2.98785	1.76518	0.994506	27.2368	213.156	0	2
3.18164	1.27725	0.719602	37.0841	162.136	0	2
3.12	2.10889	1.18815	32.1667	196.178	0	2
3.09009	0.795796	0.448352	42.5075	138.38	0	2
3.11813	1.48065	0.834201	41.6864	172.78	0	2
3.35909	1.00909	0.568523	68.2273	103.989	0	2
3.05281	0.627063	0.353288	43.4521	209.866	0	2
3.20117	1.4707	0.828596	45.6562	146.385	0	2
3.63993	1.343	0.75665	79.6997	90.2865	0	2
3.35963	1.8367	1.0348	69.4899	135.718	0	2
3.26855	1.99647	1.12481	38.9523	166.546	0	2
3.208	1.024	0.576923	48.024	127.162	0	2
3.15333	1.81111	1.02038	38.4444	191.624	0	2
3.3666	1.3762	0.775353	56.3762	107.277	0	2
2.94293	1.9603	1.10443	27.4665	218.756	0	2
3.29607	0.915114	0.515576	76.4948	137.526	0	2
3.31589	1.58333	0.892052	52.2539	148.472	0	2
3.14848	0.928444	0.523086	43.3095	171.915	0	2
3.12214	1.1145	0.627913	55.0401	127.233	0	2
3.12046	2.1912	1.23453	30.8795	194.192	0	2
3.12069	2.32375	1.30921	43.2375	165.4	0	2
3.16751	1.01777	0.573411	49.4898	141.44	0	2
3.18962	1.10158	0.620632	58.4086	126.14	0	2
3.30912	1.62942	0.918019	79.1657	88.4	0	2
3.29517	1.26209	0.711061	53.3384	133.551	0	2
3.11321	1.02516	0.577575	57.5346	109.954	0	2
3.12185	1.82143	1.0262	38.771	166.933	0	2
2.93309	0.892193	0.502663	36.829	214.114	0	2
3.5568	2.3743	1.33768	37.3408	157.122	0	2
3.43785	0.883117	0.497549	78.0186	97.9672	0	2
3.04905	2.25341	1.26957	27.8801	182.919	0	2
3.00203	1.95732	1.10275	39.8069	160.746	0	2
2.93494	1.43614	0.809126	24.4602	205.099	0	2
3.24402	1.16746	0.657751	45.2632	142.964	0	2
3.26875	2.00417	1.12915	36.2188	151.749	0	2
2.96465	1.45707	0.820915	27.6263	160.264	0	2
3.21648	2.21648	1.24876	39.2107	144.146	0	2
2.7801	1.04188	0.586999	25.2016	183.98	0	2
2.81994	1.42765	0.804341	27.3055	191.967	0	2
3.06228	1.26298	0.711562	71.0381	92.1049	0	2
3.18684	2.45435	1.38279	44.4225	134.078	0	2
2.96104	1.73098	0.975238	33.5529	162.574	0	2
3.09122	1.76351	0.993566	76.2264	75.8932	0	2
2.96354	0.833333	0.469501	76.9245	102.43	0	2
2.95781	1.67089	0.941379	32.5506	159.729	0	2
3.09709	1.06796	0.601691	51.233	83.0171	0	2
3.33908	1.5546	0.875862	74.4425	81.6375	0	2
3.0352	2.10352	1.18513	34.3954	147.188	0	2
28.3682	3.99779	4.03577	79.2543	76.9332	1	3
55.1058	6.02994	6.08723	53.994	115.706	1	3
38.493	2.0112	2.03031	68.0182	105.012	1	3
50.2258	2.84677	2.87382	103.089	108.12	1	3
9.72879	1.1057	1.11621	39.2364	128.628	1	3
69.741	3.32229	3.35385	54.5316	120.051	1	3
54.4272	2.6068	2.63156	67.9272	112.2	1	3
28.0652	5.68224	5.73622	61.1469	79.9954	1	3
62.2543	3.28272	3.3139	36.9741	117.599	1	3
50.5718	3.82562	3.86197	55.7817	92.3211	1	3
45.9426	2.89728	2.92481	42.7523	98.9353	1	3
62.5954	22.7909	23.0074	82.5936	48.4688	1	3
36.4452	4.09539	4.1343	40.0254	104.34	1	3
58.6289	5.93396	5.99034	47.5362	108.388	1	3
8.64362	1.24601	1.25785	41.3923	113.221	1	3
46.4667	5.86778	5.92352	57.3989	83.3964	1	3
12.2956	1	1.0095	40.7233	114.294	1	3
39.4594	3.13597	3.16577	37.7399	115.083	1	3
20.9709	1.28909	1.30134	46.0782	122.763	1	3
61	10.2203	10.3174	62.9523	83.6352	1	3
7.01047	0.773256	0.780602	55.5291	66.5046	1	3
59.4867	6.04436	6.10178	47.6743	104.584	1	3
11.8707	0.987737	0.997121	53.8997	85.0632	1	3
47.8244	4.14233	4.18168	45.1848	95.2061	1	3
9.02873	1.15619	1.16718	64.675	84.7937	1	3
13.6548	1.26022	1.27219	80.5914	43.7122	1	3
43.5502	7.12883	7.19655	67.7413	93.341	1	3
16.4715	1.08457	1.09487	40.4651	112.051	1	3
53.145	3.95622	3.99381	32.8646	130.076	1	3
38.3586	13.793	13.9241	84.6149	73.5729	1	3
39.8587	8.58055	8.66207	59.5912	63.1815	1	3
44.9171	5.4558	5.50763	48.7376	98.7722	1	3
41.4105	8.86408	8.94829	51.4424	77.863	1	3
8.55699	0.984946	0.994304	64.4108	51.0906	1	3
15.7193	1.05789	1.06795	52.8439	96.8117	1	3
15.2087	0.986486	0.995858	48.7703	96.7687	1	3
32.2927	7.10838	7.17591	52.8413	85.0204	1	3
10.2647	0.810458	0.818157	37.4592	118.24	1	3
39.7306	7.70539	7.77859	47.1869	110.223	1	3
14.5064	0.994152	1.0036	49.0082	86.1355	1	3
39.2886	3.84903	3.8856	48.5072	93.4907	1	3
39.1648	6.07358	6.13128	55.8953	106.91	1	3
59.0316	5.65202	5.70572	45.5483	105.732	1	3
64.1767	15.0902	15.2336	64.3158	71.1584	1	3
33.7414	7.98103	8.05686	50.4414	94.52	1	3
7.86945	0.748318	0.755427	45.7806	105.4	1	3
48.8201	2.25497	2.27639	34.8929	124.268	1	3
42.6971	2.98226	3.0106	39.8963	113.53	1	3
44.8908	8.79005	8.87356	62.568	87.0958	1	3
12.5486	1.06955	1.07971	43.7546	96.259	1	3
58.4684	11.0934	11.1988	58.0896	78.0343	1	3
28.6289	3.2268	3.25746	40.3015	99.9507	1	3
14.7596	0.632058	0.638063	30.4007	134.793	1	3
11.8031	0.8375	0.845457	31.2469	123.76	1	3
16.7185	0.857404	0.86555	43.5923	111.52	1	3
8.8405	0.789593	0.797094	55.0611	85.7232	1	3
11.6799	1.04117	1.05106	54.4529	95.3608	1	3
46.0948	3.32522	3.35681	37.8079	118.11	1	3
13.8379	0.926771	0.935575	59.2329	82.4912	1	3
13.3093	0.979196	0.988498	59.6491	88.0396	1	3
39.2168	1.38042	1.39353	34.5161	130.975	1	3
39.7691	10.4365	10.5356	58.0462	72.2026	1	3
36.6263	6.50176	6.56353	61.8496	83.2472	1	3
7.76084	1.05594	1.06598	46.7021	104.42	1	3
7.7808	0.884058	0.892457	32.9764	122.257	1	3
7.73754	0.758065	0.765266	53.0733	68.0382	1	3
14.9276	0.732591	0.73955	49.9708	88.0882	1	3
20.7471	1.19634	1.20771	47.8619	97.9117	1	3
56.325	5.815	5.87024	60.465	99.0194	1	3
7.65939	0.901747	0.910314	41.4563	109.938	1	3
14.6237	0.707904	0.714629	45.8505	90.5479	1	3
29.5069	10.167	10.2636	58.0825	79.9311	1	3
39.8337	2.96061	2.98874	36.8446	124.65	1	3
7.90968	0.84086	0.848849	55.1548	96.56	1	3
4.03523	1.40772	1.42109	35.3607	215.567	0	3
4.17004	1.80262	1.81974	35.2628	204.703	0	3
3.46041	0.872928	0.881221	36.86	173.815	0	3
3.85143	1.11238	1.12295	96.8571	20.0715	0	3
3.6537	1.09533	1.10574	45.0097	165.706	0	3
4.2156	1.28227	1.29445	36.0879	207.965	0	3
5.05844	1.37446	1.38752	109.104	57.464	0	3
4.81202	1.44376	1.45748	46.5578	166.035	0	3
4.52654	1.34577	1.35855	124.679	68.6404	0	3
3.70662	1.2415	1.2533	28.2469	201.413	0	3
5.04984	1.22785	1.23951	103.084	43.5479	0	3
5.66235	1.32118	1.33373	83.6271	93.2927	0	3
4.21827	1.13325	1.14401	53.3591	185.218	0	3
4.82051	1.53561	1.5502	97.0057	75.4034	0	3
3.82124	1.20984	1.22134	43.2254	179.155	0	3
4.43357	1.30303	1.31541	59.3077	124.046	0	3
4.0651	1.41667	1.43013	32.276	216.047	0	3
4.11039	1.06494	1.07505	43.5844	188.857	0	3
4.10779	1.27662	1.28875	139.395	33.9949	0	3
4.90289	1.34711	1.35991	57.6715	120.478	0	3
3.78647	1.16391	1.17497	47.4586	178.811	0	3
4.98112	1.26662	1.27865	96.0219	40.678	0	3
4.18659	1.207	1.21846	33.6997	203.184	0	3
3.92742	1.32258	1.33515	44.7408	212.667	0	3
3.69412	1.15059	1.16152	31.4118	204.706	0	3
4.01216	1.231	1.2427	29.69	192.795	0	3
4.04811	1.27835	1.2905	32.6838	176.8	0	3
4.96697	1.54312	1.55778	57.5798	122.4	0	3
5.00429	1.91143	1.92959	89.0229	75.82	0	3
4.62751	1.1692	1.18031	86.0377	33.1548	0	3
4.83507	1.12587	1.13656	90.7257	73.8199	0	3
4.06675	1.17182	1.18295	46.4858	209.926	0	3
4.21429	1.31063	1.32308	43.3654	165.894	0	3
4.35823	1.75443	1.7711	110.457	2.58936	0	3
3.4949	1.04082	1.0507	51.8189	205.201	0	3
4.37713	1.12992	1.14065	57.1537	114.249	0	3
4.34971	1.39096	1.40418	49.5187	147.446	0	3
3.725	1.275	1.28711	72.8	194.266	0	3
4.5136	1.56949	1.5844	60.139	129.057	0	3
4.6422	1.53211	1.54667	79.8609	71.3328	0	3
4.40266	1.19634	1.20771	56.5008	140.741	0	3
4.42593	1.25463	1.26655	48.9618	167.523	0	3
4.52443	1.28827	1.30051	105.357	21.8263	0	3
4.22145	1.15152	1.16245	45.2005	178.44	0	3
4.64309	1.32315	1.33572	77.783	90.9581	0	3
3.99407	1.24889	1.26075	52.9496	158.723	0	3
4.50175	1.07099	1.08117	81.7362	80.5657	0	3
4.53634	1.33921	1.35193	90.4934	48.8513	0	3
4.34018	1.09371	1.1041	64.0327	114.299	0	3
3.88551	1.29855	1.31089	47.6971	209.835	0	3
4.15692	1.25678	1.26872	63.5492	150.505	0	3
4.7176	1.54352	1.55818	83.3888	103.82	0	3
3.96965	1.13006	1.14079	38.9032	199.209	0	3
4.46789	1.43578	1.44942	67.0688	123.293	0	3
3.92599	1.42238	1.4359	42.4892	188.318	0	3
3.78765	0.963855	0.973012	41.1235	169.24	0	3
4.35075	1.2209	1.23249	86.9373	70.1027	0	3
4.21849	1.19748	1.20886	115.937	42.9384	0	3
3.98544	1.40466	1.418	75.2358	159.389	0	3
3.81884	1.2657	1.27773	62.2802	182.709	0	3
4.11765	1.32983	1.34247	88.3992	112.063	0	3
3.85459	1.21939	1.23097	66.0332	174.087	0	3
4.59485	2.19204	2.21286	143.616	69.2699	0	3
4.23207	1.15823	1.16923	71.2321	122.87	0	3
4.29678	1.42398	1.4375	80.6681	100.691	0	3
4.18828	1.5258	1.5403	138.424	78.5871	0	3
4.07241	1.16456	1.17562	45.3686	205.466	0	3
4.30996	1.89668	1.9147	128.277	64.9827	0	3
4.11073	1.16354	1.1746	52.0341	167.409	0	3
4.85034	1.68481	1.70081	97.0181	91.5686	0	3
4.1648	1.2352	1.24693	47.2944	193.879	0	3
4.12367	1.42004	1.43353	69.194	135.688	0	3
3.88515	1.42376	1.43729	85.0059	109.345	0	3
3.88839	1.14932	1.16024	97.5249	50.1543	0	3
3.96501	1.05102	1.06101	51.2259	212.353	0	3
4.54239	1.46758	1.48152	106.127	87.8971	0	3
4.30037	1.63993	1.65551	101.799	78.092	0	3
4.61602	1.98343	2.00227	121.086	70.0111	0	3
3.83755	1.15612	1.1671	58.9578	181.168	0	3
3.81532	1.49658	1.5108	98.0383	21.203	0	3
4.29908	1.14203	1.15288	58.9619	197.554	0	3
4.2701	1.1491	1.16002	76.929	145.471	0	3
3.96866	1.07313	1.08333	58.394	160.331	0	3
4.08132	1.15375	1.16471	81.7611	125.751	0	3
4.53701	1.14199	1.15284	87.0053	113.646	0	3
4.09718	1.23354	1.24526	56.6771	167.513	0	3
4.37584	1.39821	1.41149	61.3244	153.784	0	3
4.53344	1.72162	1.73797	67.1306	145.153	0	3
4.58824	1.34314	1.3559	80.2731	180.157	0	3
4.91232	1.6952	1.7113	88.2463	107.219	0	3
3.74876	1.21144	1.22295	59.8085	193.446	0	3
4.57143	1.39478	1.40803	104.535	91.0445	0	3
4.2391	1.48465	1.49876	81.7948	115.259	0	3
4.26128	1.35614	1.36903	96.5039	76.4456	0	3
3.54101	1.43691	1.45056	111.093	15.9257	0	3
4.21987	1.47146	1.48544	58.3721	201.887	0	3
4.52925	2.60167	2.62639	69.9833	141.615	0	3
4.11466	1.33237	1.34502	55.836	181.581	0	3
4.235	1.36625	1.37923	93.1225	106.055	0	3
4.14712	1.55224	1.56699	84.565	118.818	0	3
3.96894	1.25466	1.26658	56.4037	196.178	0	3
4.10845	1.35885	1.37176	76.5439	137.886	0	3
4.0888	1.2278	1.23946	53.9447	205.588	0	3
4.22194	1.25221	1.2641	87.6646	75.9076	0	3
3.54571	1.15512	1.1661	110.41	93.4777	0	3
3.9224	1.21527	1.22681	65.9662	173.171	0	3
3.86154	1.31624	1.32874	69.2137	184.23	0	3
3.96368	1.38034	1.39346	84.0598	141.855	0	3
4.31072	1.36906	1.38207	87.0529	109.944	0	3
3.97872	1.27332	1.28542	67.347	167.74	0	3
4.65159	1.57119	1.58612	102.663	79.5702	0	3
3.95851	1.2289	1.24057	69.0629	135.745	0	3
4.27479	1.36261	1.37555	98.2394	87.5195	0	3
3.84882	1.04252	1.05242	56.5496	199.129	0	3
4.08376	1.2735	1.2856	72.412	155.612	0	3
3.83491	0.967524	0.976715	90.751	101.3	0	3
3.90321	1.18462	1.19587	195.65	58.2998	0	3
4.35931	1.61616	1.63152	88.2179	106.048	0	3
3.80306	1.186	1.19726	77.5361	169.834	0	3
4.80429	1.7904	1.80741	142.98	24.6236	0	3
4.4	1.74667	1.76326	83.6364	90.3786	0	3
4.06397	1.33165	1.3443	72.7357	160.089	0	3
4.13668	1.50865	1.52298	84.6938	126.362	0	3
4.09946	0.825613	0.833457	97.1017	78.1741	0	3
3.68936	1.31915	1.33168	106	147.628	0	3
3.61364	0.919421	0.928156	70.438	193.328	0	3
3.90435	0.956522	0.965609	69.0522	183.606	0	3
4.33053	1.12195	1.13261	86.0177	134.87	0	3
3.7863	0.954795	0.963865	67.0753	158.567	0	3
4.01517	1.12369	1.13436	92.5018	79.8276	0	3
3.93649	1.12973	1.14046	64.7027	172.524	0	3
3.84421	0.838881	0.846851	67.0559	150.525	0	3
4.2801	0.969736	0.978949	94.8216	101.761	0	3
4.12989	1.10798	1.11851	93.8216	88.3922	0	3
4.04376	1.2175	1.22907	95.3411	113.128	0	3
3.75909	0.881818	0.890196	80.2197	26.52	0	3
3.80123	1.08466	1.09497	95.1485	14.7185	0	3
3.94211	0.945614	0.954598	29.5544	216.328	0	3
4.74203	1.24104	1.25283	125.68	21.1785	0	3
4.19004	1.02359	1.03332	63.671	57.9648	0	3
4.93952	1.40281	1.41613	83.1425	85.9763	0	3
3.85031	0.960499	0.969624	39.0665	142.826	0	3
4.09227	1.06234	1.07244	41.8529	174.569	0	3
5.17157	1.34559	1.35837	103.826	72.503	0	3
5.01419	1.29161	1.30388	104.114	76.5068	0	3
4.18364	1.18827	1.19956	33.5077	202.98	0	3
4.33266	1.01826	1.02793	81.3712	33.32	0	3
4.58581	1.68192	1.6979	79.1556	92.48	0	3
4.88328	1.38576	1.39892	88.6815	45.9	0	3
5.37191	1.2417	1.2535	72.8306	108.564	0	3
4.72525	1.2	1.2114	51.0949	132.674	0	3
3.64028	1.07401	1.08421	32.0826	195.596	0	3
4.46879	1.09695	1.10737	49.7238	118.535	0	3
5.07778	1.43056	1.44415	102.596	44.8285	0	3
5.65873	1.71746	1.73378	84.6524	82.5129	0	3
4.95802	1.23238	1.24409	69.5622	104.052	0	3
4.34698	1.06977	1.07993	89.9423	39.0068	0	3
4.73601	1.39416	1.40741	100.911	59.0466	0	3
4.45932	1.27428	1.28638	62.3018	101.121	0	3
4.58296	1.18984	1.20114	65.0673	135.713	0	3
5.06903	1.41323	1.42666	100.628	58.3504	0	3
4.61218	1.44645	1.46019	92.1759	90.417	0	3
4.00585	1.04348	1.05339	66.9064	119.166	0	3
4.67778	1.26	1.27197	74.72	132.684	0	3
4.90371	1.43191	1.44552	78.7249	149.669	0	3
4.20016	1.09813	1.10856	45.4969	188.801	0	3
3.89756	1.2748	1.28691	38.4309	215.701	0	3
4.18826	1.28239	1.29457	58.3725	156.911	0	3
4.00704	1.03052	1.04031	87.8345	54.5909	0	3
3.66489	0.996454	1.00592	116.598	30.0203	0	3
4.0165	0.909241	0.917879	48.0116	177.512	0	3
4.09935	1.1268	1.1375	62.3791	133.551	0	3
4.10017	0.986183	0.995552	89.8705	35.4596	0	3
4.19306	1.37961	1.39272	117.169	64.7341	0	3
3.55991	1.06912	1.07928	51.6774	188.919	0	3
4.18566	0.852941	0.861044	89.1489	58.2939	0	3
4.35818	1.10289	1.11337	78.426	130.646	0	3
4.19635	1.19292	1.20426	85.4475	100.162	0	3
4.13878	0.990476	0.999886	54.9116	172.054	0	3
4.70317	1.2781	1.29024	105.078	64.6188	0	3
4.29451	1.28916	1.3014	60.9438	148.145	0	3
4.76693	1.49203	1.50621	83.753	163.649	0	3
3.44733	1.01135	1.02095	91.8784	39.796	0	3
4.16593	1.41263	1.42605	67.4919	150.896	0	3
4.35742	1.27332	1.28542	87.8226	66.898	0	3
4.01939	1.04017	1.05005	80.8047	130.337	0	3
4.11027	1.18251	1.19374	102.587	85.1712	0	3
4.34214	1.10103	1.11149	76.7956	160.76	0	3
4.19318	1.42159	1.4351	87.8682	46.3411	0	3
4.14183	1.08453	1.09483	93.5186	53.2238	0	3
3.86654	1.09671	1.10713	80.1296	123.015	0	3
4.12963	0.939394	0.948318	88.9125	94.7259	0	3
4.31865	1.03818	1.04804	71.8209	178.835	0	3
4.00308	0.824176	0.832006	71.0624	124.518	0	3
3.78593	0.998471	1.00796	60.5673	187.029	0	3
4.0232	1.01804	1.02771	63.2964	134.431	0	3
4.42453	1.00515	1.0147	85.9846	113.073	0	3
4.51143	1.22623	1.23788	123.472	33.2245	0	3
4.00574	0.859146	0.867308	96.8751	63.0991	0	3
4.17143	0.990476	0.999886	84.5291	120.958	0	3
4.08192	1.21717	1.22873	96.459	70.0111	0	3
3.87748	0.857643	0.865791	71.1155	112.659	0	3
3.85782	1.23378	1.2455	80.2643	28.6004	0	3
4.74962	1.21679	1.22835	92.3664	126.299	0	3
4.03841	1.14651	1.15741	71.66	184.446	0	3
4.11852	0.678189	0.684632	50.9021	124.886	0	3
3.75842	0.775988	0.78336	39.9795	188.004	0	3
3.89704	0.871852	0.880135	89.7	28.1297	0	3
4.45509	1.00906	1.01864	73.9517	57.5444	0	3
3.52093	0.813953	0.821686	30.6535	190.961	0	3
4.4277	1.37303	1.38607	64.0474	137.36	0	3
4.67496	1.19766	1.20904	69.2679	93.6044	0	3
4.33525	1.60576	1.62101	40.3626	197.914	0	3
4.22804	0.88906	0.897506	51.4807	122.14	0	3
4.35539	1.75912	1.77583	99.2061	4.3007	0	3
4.54154	0.998948	1.00844	84.061	66.1429	0	3
4.11705	1.11561	1.12621	40.698	180.717	0	3
4.19807	1.01932	1.02901	53.1498	128.491	0	3
4.32034	0.806174	0.813833	77.9261	42.149	0	3
4.06354	1.24271	1.25451	95.7979	24.7524	0	3
4.44959	0.821553	0.829358	59.146	105.306	0	3
4.12747	1.09105	1.10141	40.0577	211.192	0	3
4.73568	2.25895	2.28041	124.053	3.5497	0	3
4.01993	0.966777	0.975962	53.0947	139.526	0	3
4.072	0.970667	0.979888	78.8773	48.0604	0	3
4.082	1.09	1.10036	95.236	69.9616	0	3
4.44911	0.968193	0.977392	80.173	83.3416	0	3
4.26794	2.25439	2.2758	97.1268	8.27256	0	3
4.26076	0.878481	0.886827	106.887	113.073	0	3
4.07317	1.37303	1.38607	46.1133	198.174	0	3
4.11322	0.97438	0.983637	68.3504	132.124	0	3
4.25084	0.807821	0.815496	94.4609	44.0756	0	3
4.15497	0.858187	0.86634	56.7178	142.676	0	3
4.07622	0.839939	0.847919	75.9024	93.9243	0	3
4.19627	0.985746	0.995111	66.2018	119.022	0	3
3.83599	2.48079	2.50436	101.754	8.56098	0	3
4.03143	1.13234	1.1431	94.4351	47.993	0	3
4.56279	1.13721	1.14801	86.3953	96.1208	0	3
3.90709	1.0489	1.05886	62.4046	159.664	0	3
3.69931	0.991724	1.00115	45.9421	203.674	0	3
4.21513	1.33364	1.34631	98.1267	26.8083	0	3
3.8945	0.79637	0.803936	85.0925	49.5047	0	3
4.02718	2.88502	2.91243	86.1645	5.69944	0	3
4.2404	1.06257	1.07266	52.3864	193.92	0	3
4.21924	1.09013	1.10049	83.1169	59.1346	0	3
4.2642	1.14927	1.16019	81.0013	118.917	0	3
4.04051	3.21677	3.24733	81.6887	2.58936	0	3
3.97652	1.12916	1.13989	92.6204	144.418	0	3
4.40902	0.981636	0.990962	109.422	63.2382	0	3
4.15031	0.779141	0.786543	118.607	56.2399	0	3
4.13287	0.810039	0.817735	82.1781	114.961	0	3
4.01465	0.85348	0.861588	83.5665	69.6925	0	3
4.24868	0.873016	0.88131	76.7269	104.648	0	3
4.21678	1.06598	1.0761	102.815	76.7723	0	3
4.16701	3.91856	3.95579	91.3651	1.40186	0	3
4.09682	0.907162	0.91578	63.3276	152.787	0	3
3.77926	0.769947	0.777262	49.3989	201.628	0	3
4.0983	0.785194	0.792654	64.0583	142.836	0	3
4.16477	0.983523	0.992867	60.0646	171.32	0	3
4.17695	0.871193	0.87947	88.614	52.9615	0	3
4.38668	1.08579	1.0961	69.8451	141.894	0	3
4.17036	1.00817	1.01775	86.6756	101.687	0	3
4.04188	0.965271	0.974441	60.1154	199.407	0	3
3.99495	1.00379	1.01332	72.6907	169.298	0	3
4.52951	0.791667	0.799188	80.6476	73.4471	0	3
4.30334	0.930591	0.939432	97.9666	67.08	0	3
4.28951	1.13737	1.14818	80.2024	22.3678	0	3
3.99592	1.19728	1.20865	73.8204	23.12	0	3
5.31847	1.0414	1.05129	79.879	97.92	0	3
4.93271	1.07193	1.08211	76.5708	88.06	0	3
4.3246	1.19177	1.20309	88.8241	5.60742	0	3
4.52956	1.01006	1.01966	49.0063	133.287	0	3
4.42414	1.02414	1.03387	85.6836	32.901	0	3
4.12887	0.912371	0.921039	44.7397	156.188	0	3
3.90256	1.04615	1.05609	34.5077	193.791	0	3
3.91393	0.842547	0.850552	33.6249	205.82	0	3
4.26565	0.995828	1.00529	44.1613	174.253	0	3
4.25921	0.793997	0.80154	67.0778	100.425	0	3
3.86072	0.877437	0.885773	90.9387	73.9686	0	3
4.52355	1.20129	1.21271	88.4635	63.5809	0	3
4.3945	1.30408	1.31647	95.5665	19.626	0	3
4.12113	0.960052	0.969172	49.8209	157.191	0	3
4.16302	1.34915	1.36197	39.1071	208.388	0	3
3.87441	0.927786	0.936601	45.3344	169.361	0	3
4.47426	0.979719	0.989027	74.4275	106.873	0	3
4.38319	0.954416	0.963483	87.8034	84.6218	0	3
4.12202	0.911641	0.920302	80.3212	70.7077	0	3
4.08249	0.837916	0.845877	43.712	197.108	0	3
4.12876	0.813305	0.821031	48.8991	178.934	0	3
4.24277	1.2789	1.29105	58.763	150.267	0	3
4.27881	0.810099	0.817795	80.3908	90.6373	0	3
3.85917	0.777778	0.785167	59.2868	121.603	0	3
4.59398	1.60949	1.62478	102.394	17.2364	0	3
4.32092	1.05731	1.06735	67.4713	139.345	0	3
4.30653	0.881407	0.889781	77.8844	109.454	0	3
4.70265	0.945133	0.954112	83.8487	78.4877	0	3
4.3742	1.06392	1.07402	91.24	89.5621	0	3
4.51472	0.914213	0.922898	99.6927	98.3311	0	3
4.01655	0.834483	0.842411	59.5062	138.755	0	3
3.97004	1.02871	1.03849	64.4432	109.099	0	3
4.07601	1.08644	1.09676	57.8778	183.067	0	3
4.11699	0.766017	0.773294	90.0167	60.5324	0	3
4.13403	0.981352	0.990675	91.3089	39.3989	0	3
3.56938	0.742823	0.74988	41.3517	195.387	0	3
4.4084	1.11435	1.12494	91.5099	29.9991	0	3
3.88062	1.00465	1.0142	58.2357	162.211	0	3
4.01929	0.730554	0.737494	87.7598	46.406	0	3
3.96234	0.888424	0.896864	61.4059	179.038	0	3
3.79324	0.890656	0.899118	52.001	192.865	0	3
4.27372	0.97332	0.982567	73.4743	157.763	0	3
3.81279	0.808979	0.816665	94.3236	42.3146	0	3
4.35519	0.897268	0.905792	94.765	67.7548	0	3
3.70095	0.886333	0.894753	93.5129	55.9556	0	3
4.36803	1.18587	1.19714	87.7249	16.7844	0	3
3.98611	0.719136	0.725968	82.7438	28.8038	0	3
3.98397	0.75656	0.763747	76.035	29.7028	0	3
4.34462	0.88247	0.890854	91.8825	34.9473	0	3
3.60314	0.842829	0.850836	33.9725	170.645	0	3
3.86943	0.794586	0.802135	45.2532	200.973	0	3
4.60992	0.724708	0.731593	78.1634	91.6425	0	3
4.36878	1.18732	1.1986	104.64	12.9021	0	3
4.16511	1.05919	1.06925	32.9891	212.504	0	3
4.27184	1.00485	1.0144	45.2573	159.913	0	3
4.38095	0.798379	0.805964	82.7923	84.0178	0	3
4.20281	0.839314	0.847287	47.6303	168.802	0	3
3.86022	0.736559	0.743557	80.4875	101.252	0	3
3.83385	0.70908	0.715816	36.5979	181.386	0	3
4.10671	0.833216	0.841131	68.1004	127.086	0	3
4.1562	0.974235	0.983491	48.9388	185.163	0	3
3.72047	0.76378	0.771036	75.2428	177.099	0	3
4.25208	1.08542	1.09573	62.3083	159.835	0	3
4.09559	0.824755	0.83259	92.5441	48.2764	0	3
4.48047	1.09349	1.10388	99.9586	36.7735	0	3
3.72178	0.825459	0.833301	48.0472	201.214	0	3
4.23832	0.931464	0.940313	65.4097	132.898	0	3
3.82103	1.09413	1.10453	103.748	16.8806	0	3
4.3352	0.995331	1.00479	58.4323	164.853	0	3
3.91407	0.863704	0.871909	67.3978	119.422	0	3
4.28364	0.930642	0.939483	86.2133	79.349	0	3
3.90201	0.834171	0.842096	80.3216	148.447	0	3
3.75241	0.792297	0.799824	75.8473	88.06	0	3
4.26309	0.99106	1.00048	65.1609	171.852	0	3
4.12032	0.915187	0.923882	85.2347	127.545	0	3
3.77676	0.946483	0.955475	52.7416	184.57	0	3
4.17096	0.810888	0.818592	81.191	84.444	0	3
3.47681	0.912801	0.921473	107.755	21.9346	0	3
4.00908	0.844495	0.852518	68.8899	94.7679	0	3
4.06519	0.805926	0.813582	73.6593	131.077	0	3
4.0529	0.724687	0.731572	78.822	86.4269	0	3
3.55612	0.929221	0.938049	84.8018	23.1225	0	3
4.11354	0.922025	0.930784	63.2517	185.253	0	3
3.91541	0.891239	0.899706	58.7659	163.658	0	3
4.00688	0.713303	0.720079	81.0436	77.5595	0	3
3.912	1.01785	1.02752	104.89	38.9445	0	3
4.13745	0.814867	0.822608	85.3029	90.1616	0	3
3.90619	0.812383	0.820101	95.0131	31.8404	0	3
3.83257	0.620584	0.626479	64.5745	52.2683	0	3
4.16463	0.887195	0.895624	103.901	25.3066	0	3
4.71739	1.52	1.53444	97.3626	4.76	0	3
3.97611	0.734076	0.74105	84.2882	18.8845	0	3
4.23996	0.829241	0.837119	76.971	58.2393	0	3
4.22987	1.63926	1.65484	94.6124	7.42571	0	3
4.33181	0.818874	0.826653	50.277	119.487	0	3
3.8327	1.16857	1.17967	39.8086	165.899	0	3
4.08838	0.883838	0.892235	48.8573	140.063	0	3
3.85012	0.840749	0.848737	73.2998	135.238	0	3
4.2259	1.0397	1.04957	94.7599	24.14	0	3
3.81818	1	1.0095	36.511	197.248	0	3
3.63556	0.686667	0.69319	63.0156	147.084	0	3
3.71087	0.697974	0.704605	37.4604	190.419	0	3
4.15703	0.869942	0.878207	89.7389	34.0578	0	3
4.19773	0.754457	0.761625	72.8233	98.556	0	3
4.04141	0.791717	0.799239	46.285	165.664	0	3
4.199	0.674438	0.680845	83.6861	67.0912	0	3
4.00821	0.906977	0.915593	65.6088	143.291	0	3
4.11783	0.793535	0.801074	93.8624	71.1778	0	3
3.91206	0.97305	0.982294	52.2	187.767	0	3
3.90175	0.665497	0.67182	72.0643	56.318	0	3
3.74857	0.849524	0.857595	106.385	25.4819	0	3
3.80769	1.06805	1.07819	88.8476	15.0524	0	3
4.02426	0.656334	0.66257	76.973	78.2739	0	3
3.79087	0.69962	0.706266	78.0456	140.845	0	3
3.58609	0.688742	0.695285	60.3245	143.815	0	3
4.08727	0.950303	0.959331	47.7539	170.64	0	3
4.04143	0.708098	0.714825	110.307	31.3188	0	3
4.02006	4.79083	4.83635	89.2529	9.28642	0	3
4.09091	0.980769	0.990087	72.9668	170.207	0	3
3.9577	0.793051	0.800586	79.6299	109.947	0	3
4.06731	0.723291	0.730162	78.5021	122.135	0	3
4.14671	0.751174	0.75831	96.1338	54.1807	0	3
3.92895	0.759649	0.766866	71.0219	142.146	0	3
4.04286	0.901299	0.909861	74.487	89.9999	0	3
4.14543	5.31893	5.36947	90.3362	9.15478	0	3
3.89976	0.688679	0.695222	78.5932	46.2262	0	3
4.0177	0.757269	0.764464	60.0405	39.2475	0	3
4.5	0.814332	0.822069	76.4007	74.2984	0	3
3.8773	0.897751	0.906279	69.7055	143.389	0	3
4.03292	0.758573	0.76578	69.0631	122.033	0	3
4.09567	0.883827	0.892224	59.5	112.357	0	3
3.90923	0.652308	0.658505	68.9754	88.2233	0	3
3.66667	0.516129	0.521032	77.9263	74.1644	0	3
4.30911	1.00739	1.01696	61.7118	156.014	0	3
3.86364	0.97543	0.984697	36.215	208.481	0	3
3.96	0.862857	0.871055	40.55	198.346	0	3
4.08247	0.88961	0.898062	65.6195	148.762	0	3
4.25775	0.826761	0.834615	73.2	100.565	0	3
4.0825	0.8425	0.850504	83.0075	36.1265	0	3
4.22927	0.684146	0.690646	79.3744	49.3106	0	3
4.1953	0.784418	0.791871	71.54	130.302	0	3
3.9577	1.03384	1.04366	53.1032	160.141	0	3
3.90936	0.72076	0.727608	72.4401	95.8806	0	3
4.24653	0.85208	0.860175	61.3174	151.567	0	3
3.84705	0.665122	0.671441	80.4983	58.8239	0	3
3.63422	0.824176	0.832006	93.4301	18.9243	0	3
3.99659	0.67463	0.681039	76.7418	63.6091	0	3
4.1152	0.7952	0.802755	60.2128	159.11	0	3
3.87164	0.786064	0.793531	54.9633	181.419	0	3
4.07942	0.842282	0.850284	69.3378	98.4897	0	3
3.72068	0.703704	0.710389	78.6806	131.943	0	3
3.97238	0.85221	0.860306	97.0718	34.9655	0	3
3.94768	0.709869	0.716613	118.763	16.2703	0	3
3.88838	0.76082	0.768048	40.4579	119.736	0	3
4.27802	0.825275	0.833115	90.7604	33.6531	0	3
3.80435	1.08385	1.09415	29.5668	209.06	0	3
3.87809	0.808642	0.816324	59.9367	150.082	0	3
3.87366	1.08871	1.09905	43.9852	122.704	0	3
3.98323	0.90566	0.914264	69.6625	87.4117	0	3
3.96822	0.758879	0.766088	37.4187	179.505	0	3
4.63894	3.43894	3.47161	127.545	11.56	0	3
4.32575	0.702703	0.709379	73.2646	67.043	0	3
3.77553	0.594937	0.600589	61.0692	106.264	0	3
4.11779	1.17067	1.18179	47.5938	117.458	0	3
4.23673	1.39475	1.408	54.3523	155.398	0	3
3.76513	3.39467	3.42692	107.713	13.0801	0	3
4.06042	0.657292	0.663536	82.8042	34.635	0	3
3.72516	0.846452	0.854493	40.4942	193.867	0	3
4.06815	0.918519	0.927245	43.1556	167.176	0	3
4.20022	0.771798	0.77913	79.4166	45.7701	0	3
4.13037	0.945185	0.954165	47.9111	144.81	0	3
4.5977	4.15287	4.19233	114.233	9.28019	0	3
4.24226	0.831763	0.839665	64.7793	124.398	0	3
3.90426	0.808511	0.816192	42.0904	181.955	0	3
4.30224	0.846517	0.854559	53.889	112.571	0	3
3.92978	0.707865	0.71459	43.9115	156.645	0	3
3.90245	0.802972	0.8106	72.0859	133.036	0	3
3.94759	0.939093	0.948015	43.7181	175.556	0	3
3.73294	0.761176	0.768408	46.0329	190.808	0	3
3.93776	0.756224	0.763408	79.166	73.3723	0	3
3.79817	1.16907	1.18018	45.8755	172.728	0	3
4.09816	0.75	0.757125	69.2331	137.004	0	3
4.02083	0.68125	0.687722	73.0667	86.7527	0	3
4.06176	0.698529	0.705166	63.0926	149.542	0	3
3.74226	1.53846	1.55308	58.2757	176.536	0	3
3.96581	0.799145	0.806737	59.5171	158.375	0	3
3.9353	1.0961	1.10651	79.0409	45.7423	0	3
3.48925	0.685484	0.691996	28.6048	214.847	0	3
4.47564	0.684814	0.69132	62.4556	106.259	0	3
5.3412	2.87054	2.89781	120.704	5.81986	0	3
4.04831	0.741546	0.748591	52.4106	113.332	0	3
3.96471	0.653595	0.659804	74.9425	60.2069	0	3
3.43687	0.59596	0.601621	26.5455	204.548	0	3
3.80088	0.809663	0.817355	30.8346	214.2	0	3
3.51869	0.574766	0.580227	93.8131	55.8356	0	3
3.6848	0.988743	0.998136	83.5516	49.6784	0	3
4.46346	2.86185	2.88904	101.026	10.7517	0	3
3.97674	0.626539	0.632491	86.1423	103.078	0	3
4.20041	0.697342	0.703966	69.2076	76.1236	0	3
4.07785	1.41522	1.42867	50.0363	137.548	0	3
4.02342	1.12973	1.14046	31.636	215.512	0	3
3.90597	0.608955	0.61474	70.9209	77.5565	0	3
4.42121	0.725253	0.732143	75.701	88.4059	0	3
3.95626	0.815988	0.82374	38.4661	183.214	0	3
4.12055	0.664032	0.67034	68.5474	104.34	0	3
4.132	0.688	0.694536	60.132	93.7839	0	3
3.94351	1.22957	1.24125	36.524	207.406	0	3
4.1717	0.613208	0.619033	77.1189	55.9473	0	3
4.09191	0.671329	0.677707	86.7093	60.6402	0	3
4.21598	4.4198	4.46179	94.9479	7.52622	0	3
4.04762	0.733333	0.7403	93.382	42.7941	0	3
3.75309	0.52716	0.532169	70.7457	29.2479	0	3
4.10436	0.772787	0.780129	66.8877	108.056	0	3
3.85819	1.01023	1.01983	51.5453	182.498	0	3
3.89439	0.814785	0.822525	112.015	72.9124	0	3
3.88428	0.751092	0.758227	76.5513	43.4376	0	3
3.18105	0.541455	0.546599	91.9966	27.9752	0	3
3.72374	0.719844	0.726683	67.6641	93.5	0	3
3.82228	0.931034	0.93988	42.3263	195.815	0	3
3.74398	0.641963	0.648062	63.8393	112.901	0	3
4.15868	0.941617	0.950562	57.1916	142.363	0	3
4.11167	0.762712	0.769958	74.5055	102.093	0	3
4.06757	0.768919	0.776224	54.8946	157.244	0	3
3.6519	0.661392	0.667676	71.4288	129.184	0	3
3.91511	0.951311	0.960349	43.2971	187.249	0	3
4.12183	1.11371	1.12429	87.4904	21.1812	0	3
4.38945	0.837262	0.845216	77.9776	108.666	0	3
3.35792	0.611714	0.617525	33.4078	183.772	0	3
4.01632	0.888112	0.896549	113.767	17.3367	0	3
3.9357	1.06652	1.07665	106.12	21.8713	0	3
4.15446	0.981358	0.990681	120.471	21.0168	0	3
3.42428	0.590738	0.596351	40.3229	149.232	0	3
4.33294	0.808561	0.816243	46.3365	120.979	0	3
3.93816	0.781797	0.789224	84.0187	60.1982	0	3
3.98611	0.736111	0.743104	58.7824	108.025	0	3
4.29752	1.09607	1.10649	89.5961	22.6068	0	3
3.77201	0.915094	0.923788	46.327	145.39	0	3
4.05563	0.628651	0.634623	64.943	81.2259	0	3
3.9322	0.639831	0.645909	67.2232	67.8681	0	3
4.16281	1.02601	1.03576	91.2736	33.6737	0	3
3.99615	0.841026	0.849016	40.7192	186.358	0	3
4.15205	0.902534	0.911108	64.9981	153	0	3
3.86371	0.798732	0.80632	40.7052	173.741	0	3
3.85876	0.669609	0.675971	64.4615	78.3809	0	3
3.78129	0.872314	0.880601	40.6852	202.985	0	3
4.03078	1.08675	1.09708	53.0979	188.943	0	3
4.14567	1.23658	1.24833	47.2563	167.439	0	3
3.8537	0.618401	0.624276	77.8069	70.8776	0	3
3.72703	0.52231	0.527272	73.9462	59.811	0	3
3.87696	0.718586	0.725413	63.9673	106.335	0	3
3.94342	0.848708	0.856771	51.4982	137.718	0	3
4.18905	1.28557	1.29779	49.7711	179.77	0	3
3.7522	0.892794	0.901276	61.7768	147.525	0	3
4.06402	0.649855	0.656028	87.5674	35.2716	0	3
4.14071	0.763661	0.770916	68.3538	113.748	0	3
3.69539	0.650301	0.656479	76.2044	61.4357	0	3
3.72032	0.542237	0.547389	81.5205	70.8457	0	3
3.93231	0.947637	0.95664	54.8914	154.993	0	3
4.84151	1.18616	1.19743	88.1635	49.64	0	3
3.4772	0.934853	0.943735	45.5977	195.227	0	3
3.89107	1.42321	1.43674	40.0464	168.083	0	3
3.96309	0.748322	0.755431	126.121	91.491	0	3
3.73981	0.962382	0.971525	46.1176	129.394	0	3
4.08708	1.02949	1.03927	45.6545	146.865	0	3
3.42587	0.865931	0.874157	36.3801	168.471	0	3
3.84749	1.09705	1.10748	41.922	179.135	0	3
3.94818	1.34314	1.3559	35.3992	198.225	0	3
3.85571	0.865714	0.873939	49.5371	136.011	0	3
3.85889	0.816825	0.824585	52.2266	117.624	0	3
4.05199	0.89948	0.908025	66.0225	106.873	0	3
3.26367	1.09807	1.1085	62.8585	197.286	0	3
3.77805	0.880299	0.888662	87.0923	95.9065	0	3
4.38745	1.12554	1.13623	65.2587	126.871	0	3
3.64072	1.12575	1.13644	75.5549	119.465	0	3
3.85545	0.877228	0.885562	58.5069	139.485	0	3
3.95376	1.08058	1.09085	67.5614	84.6463	0	3
4.36716	1.09746	1.10789	74.9359	100.425	0	3
3.77323	0.780669	0.788086	59.3222	124.142	0	3
4.53996	1.27214	1.28422	59.7257	156.926	0	3
3.93194	0.565445	0.570817	85.8984	58.5995	0	3
3.44615	0.565385	0.570756	97.9058	37.525	0	3
4.21317	1.28213	1.29431	51.0909	161.101	0	3
4.11138	1.22754	1.23921	71.1246	81.3176	0	3
3.81959	0.707904	0.714629	42.921	197.498	0	3
4.15175	1.25681	1.26875	63.0091	164.109	0	3
4.07152	0.7139	0.720682	61.3414	124.343	0	3
3.9492	0.624332	0.630263	86.5588	77.4462	0	3
4.08301	0.664112	0.670422	62.6539	131.752	0	3
4.15582	7.80375	7.87789	120.059	13.3339	0	3
3.67887	0.950837	0.95987	60.6757	189.868	0	3
4.03439	1.20106	1.21247	89.4815	143.722	0	3
3.99473	1.02108	1.03078	83.6179	27.6489	0	3
3.45631	0.696602	0.70322	30.2136	202.719	0	3
3.61863	0.922395	0.931158	46.5499	186.639	0	3
3.70712	0.978892	0.988192	33.6781	202.903	0	3
3.76183	0.647328	0.653478	63.1832	56.8939	0	3
3.76275	0.933481	0.94235	31.4723	184.081	0	3
3.76168	0.838785	0.846754	33.1355	185.226	0	3
3.12365	3.46213	3.49502	95.1886	19.4722	0	3
4.03697	1.31338	1.32586	33.6954	209.956	0	3
4.07647	0.649412	0.655581	82.5224	56.8166	0	3
3.82872	1.04786	1.05781	91.4861	95.9601	0	3
3.78177	1.29257	1.30485	36.494	213.763	0	3
3.89121	1.2887	1.30095	42.2071	169.663	0	3
3.136	0.612	0.617814	67.94	42.4687	0	3
4.36776	1.40219	1.41551	67.0892	150.765	0	3
3.95349	1.11783	1.12845	49.4512	167.333	0	3
3.8831	1.15008	1.16101	105.128	109.03	0	3
4.26667	0.998246	1.00773	54.9965	153.662	0	3
3.91275	1.11409	1.12468	86.9754	91.8504	0	3
3.44021	0.750433	0.757563	46.0607	187.384	0	3
3.58637	0.885895	0.894312	39.5594	195.971	0	3
4.07257	1.00177	1.01129	80.2584	108.962	0	3
3.46593	1.18416	1.19541	61.4365	132.93	0	3
3.29494	0.787086	0.794563	72.0576	99.213	0	3
4.14731	2.3966	2.41937	74.228	146.429	0	3
3.53077	0.676923	0.683354	64.2738	111.736	0	3
3.47538	0.704584	0.711278	72.2971	64.8287	0	3
3.91595	0.566038	0.571415	86.9211	51.98	0	3
4.10489	1.19828	1.20966	70.4569	94.8917	0	3
4.11205	9.72283	9.8152	173.831	11.709	0	3
3.95625	1.20781	1.21929	60.9859	145.705	0	3
3.46213	12.8524	12.9745	94.4724	174.743	0	3
3.8808	0.885449	0.893861	70.9985	99.5742	0	3
4.06305	3.96721	4.0049	135.425	10.8853	0	3
3.48649	1.17417	1.18533	28.3604	198.038	0	3
3.33818	0.658182	0.664435	27.0909	179.505	0	3
3.60388	1.00554	1.01509	29.7313	199.501	0	3
3.46964	0.941296	0.950238	29.7733	201.28	0	3
3.32108	0.982592	0.991927	42.9052	150.758	0	3
3.70093	1.39019	1.40339	69.4252	59.7472	0	3
3.58734	0.678481	0.684927	64.919	35.9115	0	3
4.05996	0.982869	0.992207	79.1627	93.4431	0	3
3.42017	0.568627	0.57403	69.1737	115.917	0	3
3.96476	1.26652	1.27855	42.6872	182.103	0	3
4.20681	0.992147	1.00157	87.822	137.139	0	3
3.22867	0.392491	0.39622	63.2389	76.6902	0	3
3.98254	1.09975	1.1102	39.99	176.056	0	3
3.30973	0.617257	0.623121	60.6261	46.5552	0	3
3.31449	0.434629	0.438758	69.8127	32.686	0	3
3.84501	1.01486	1.0245	46.8217	149.368	0	3
3.47041	0.66568	0.672005	49.0118	130.403	0	3
3.25589	1.42424	1.43777	64.8923	22.3678	0	3
3.83099	0.84507	0.853099	63.8692	87.8017	0	3
3.41785	0.563895	0.569252	79.2982	48.3828	0	3
3.49471	0.936575	0.945473	47.1078	194.401	0	3
3.20202	0.757576	0.764773	65.1591	119.78	0	3
4.10031	1.46759	1.48154	72.1219	114.113	0	3
3.88641	0.815642	0.823391	87.3594	78.8192	0	3
3.28383	0.894389	0.902886	68.8086	144.071	0	3
3.05736	0.582946	0.588484	51.4279	165.409	0	3
11.1798	8.4586	5.51037	116.945	55.08	1	4
20.2031	3.24233	2.11222	146.824	56.441	1	4
52.1375	8.82235	5.74733	132.541	59.5	1	4
39.2366	3.16753	2.06349	117.373	81.9971	1	4
36.2092	3.07084	2.0005	123.656	98.2653	1	4
32.3006	5.58482	3.63824	125.312	51.5299	1	4
17.2956	5.88686	3.835	138.567	74.7699	1	4
16.551	1.73542	1.13054	109.026	91.9233	1	4
27.3978	2.17274	1.41544	102.114	103.862	1	4
12.6506	2.27308	1.4808	98.3327	134.644	1	4
35.0525	17.2156	11.2151	123.717	40.7504	1	4
35.8104	47.7628	31.1152	120.079	36.6191	1	4
28.0741	2.51059	1.63553	151.029	82.447	1	4
29.0996	2.29688	1.4963	118.092	99.1507	1	4
24.5873	3.58995	2.33868	116.745	118.676	1	4
29.9031	2.99402	1.95046	83.2117	152.574	1	4
39.555	24.5253	15.977	90.5009	44.9263	1	4
27.2291	3.75966	2.44924	167.138	94.3149	1	4
29.9348	4.22585	2.75293	85.729	105.755	1	4
30.9208	3.28996	2.14325	95.7185	126.752	1	4
22.4939	5.76639	3.75653	115.105	119.354	1	4
29.1931	3.48849	2.27258	83.2481	137.712	1	4
30.0208	56.6285	36.8907	108.431	29.3682	1	4
39.4533	15.1765	9.88674	119.087	36.0368	1	4
44.7485	33.2191	21.6406	112.353	66.3	1	4
32.4837	11.8023	7.68865	110.886	89.1714	1	4
30.0311	3.70451	2.41331	95.9362	96.6569	1	4
31.0903	9.06051	5.90249	106.278	99.28	1	4
30.8961	4.38158	2.85439	85.4711	108.273	1	4
27.7062	3.06769	1.99845	85.8462	166.94	1	4
64.2368	38.6047	25.1491	102.011	43.9443	1	4
48.1475	34.4496	22.4423	123.988	45.5917	1	4
12.7239	1.82443	1.18853	100.187	51.34	1	4
62.542	33.1189	21.5753	93.4441	51.6811	1	4
12.2161	1.47094	0.958245	100.365	70.4465	1	4
22.2432	6.06757	3.95273	109.288	75.7132	1	4
23.4681	6.21099	4.04616	107.699	78.2185	1	4
28.2843	8.29739	5.40534	96.8709	109.828	1	4
22.0037	6.20594	4.04287	101.334	114.593	1	4
17.9481	1.8	1.17261	113.694	120.726	1	4
15.6777	1.70191	1.10871	95.5975	131.299	1	4
10.1157	8.94766	5.82897	44.5399	45.0099	1	4
8.54649	1.4195	0.924736	95.9342	40.8057	1	4
21.1679	18.2196	11.8692	105.388	60.106	1	4
28.2198	15.379	10.0187	109.526	65.6913	1	4
20.0294	9.30882	6.06425	92.3088	70.8874	1	4
20.3773	4.64858	3.02832	87.9251	101.32	1	4
18.5927	1.69758	1.10589	136.109	113.963	1	4
36.2365	4.66581	3.03955	109.704	114.256	1	4
14.2526	0.977041	0.636495	103.666	143.979	1	4
7.18546	1.24561	0.811457	67.1203	162.571	1	4
3.65778	0.848889	0.55301	23.4356	201.814	1	4
3.81842	1.42632	0.929176	102.042	22.1496	0	4
4.82303	1.81202	1.18045	128.622	4.42	0	4
4.07634	1.3374	0.871254	98.8626	13.6382	0	4
4.58856	1.83379	1.19462	106.338	30.715	0	4
5.33292	1.27681	0.831779	144.368	18.5542	0	4
5.4298	1.7696	1.15281	121.35	29.3465	0	4
4.9322	1.89214	1.23264	120.037	37.0974	0	4
4.59259	1.60391	1.04487	114.376	34.3551	0	4
4.31117	1.99069	1.29684	107.073	43.5479	0	4
4.95217	1.51724	0.988409	127.283	33.3217	0	4
5.15303	2.03636	1.32659	177.314	40.9033	0	4
4.6773	1.74617	1.13755	111.526	49.6924	0	4
4.90686	1.49346	0.97292	114.979	39.78	0	4
4.62151	1.61324	1.05095	119.153	46.24	0	4
4.36247	1.31983	0.859805	157.35	43.1425	0	4
4.39653	1.37175	0.893627	101.706	56.0711	0	4
4.08725	1.32215	0.861315	125.982	61.43	0	4
4.17694	1.59642	1.03999	116.575	46.8226	0	4
4.06806	0.883072	0.575278	124.852	58.5768	0	4
4.44235	1.15933	0.755247	143.375	54.6174	0	4
4.29458	1.30911	0.852825	117.596	64.6537	0	4
4.34406	1.4302	0.931705	89.6	61.4723	0	4
4.36082	1.27606	0.831291	100.624	61.9258	0	4
5.18785	1.52713	0.994848	129.22	59.9568	0	4
5.0938	1.4397	0.937894	118.776	66.4472	0	4
5.24284	1.46554	0.954725	135.208	66.6131	0	4
4.02793	1.19814	0.780529	91.0253	67.8519	0	4
4.71409	1.80301	1.17457	120.152	77.8429	0	4
4.53529	1.59294	1.03772	110.64	81.2607	0	4
3.60721	1.18975	0.775067	150.332	73.7541	0	4
4.76685	1.52475	0.993299	104.787	74.7289	0	4
4.55983	1.81854	1.18469	112.811	69.8789	0	4
4.49645	1.54728	1.00798	108.825	78.1512	0	4
5.49883	1.91803	1.24951	138.562	77.0323	0	4
4.76719	1.88594	1.2286	122.308	76.5755	0	4
4.01332	0.939106	0.611782	122.177	81.8158	0	4
3.6094	1.19892	0.781035	148.882	85.2431	0	4
4.53529	1.37255	0.894149	118.526	89.9671	0	4
5.09573	1.7624	1.14812	108.629	85.6814	0	4
5.00325	2.52683	1.64611	148.392	82.4379	0	4
4.56161	1.4455	0.941672	103.15	93.7562	0	4
5.32995	1.86168	1.21279	138.02	84.6846	0	4
5.05607	1.62804	1.06059	112.25	84.6934	0	4
4.36682	1.29401	0.842984	111.871	90.3313	0	4
4.01337	1.25597	0.818203	105.773	89.7915	0	4
4.93519	1.87963	1.22449	137.738	93.0787	0	4
4.95765	2.08958	1.36126	126.606	87.4778	0	4
3.83658	0.928571	0.604919	96.1147	92.0515	0	4
5.21011	1.52584	0.994013	132.999	89.8244	0	4
4.12472	1.39477	0.908623	106.992	97.5089	0	4
5.0327	1.79346	1.16835	163.181	92.5631	0	4
4.44904	2.0384	1.32792	111.164	92.162	0	4
4.90921	1.99187	1.29761	125.718	99.4499	0	4
4.25838	1.26536	0.824323	109.86	106.394	0	4
4.0695	1.2722	0.828777	107.913	101.73	0	4
4.98465	3.13811	2.04433	131.317	93.4332	0	4
4.62634	1.45789	0.949743	118.176	105.69	0	4
3.98166	1.37648	0.896712	108.019	101.186	0	4
4.28896	1.83618	1.19618	111.889	106.754	0	4
4.29126	1.49903	0.976545	108.617	103.767	0	4
5.29621	2.45379	1.59853	130.405	99.7505	0	4
4.95351	1.44807	0.943348	122.398	101.887	0	4
5.17426	1.77614	1.15707	149.484	99.62	0	4
3.98832	1.46178	0.952281	104.86	105.302	0	4
4.88307	2.1559	1.40447	116.634	101.847	0	4
4.27488	1.4376	0.936526	115.853	118.055	0	4
4.22644	1.16062	0.756091	83.6046	111.243	0	4
4.52933	1.49785	0.975779	117.691	115.035	0	4
4.164	1.698	1.10616	108.252	116.66	0	4
4.06161	0.92575	0.603082	130.777	112.824	0	4
5.09416	2.22679	1.45065	114.435	108.355	0	4
4.97046	1.77004	1.1531	105.455	109.846	0	4
4.83491	2.09748	1.36641	113.844	111.18	0	4
5.25503	1.81544	1.18267	134.358	112.684	0	4
5.1599	1.96062	1.27725	122.591	111.87	0	4
5.03995	1.8269	1.19014	145.117	112.913	0	4
4.71412	1.98588	1.29371	133.796	115.31	0	4
4.07189	2.09871	1.36721	116.838	122.175	0	4
4.57377	1.46498	0.954362	115.607	121.256	0	4
4.01009	1.26513	0.824171	97.5216	126.36	0	4
4.74161	1.86708	1.21631	130.68	116.763	0	4
5.25464	1.60034	1.04254	131.281	122.527	0	4
4.62847	1.49826	0.976046	117.33	121.38	0	4
4.35739	1.68499	1.09769	122.066	124.138	0	4
3.64162	0.995665	0.648627	94.1012	130.702	0	4
5.00977	2.57631	1.67834	128.89	127.071	0	4
5.72727	1.74793	1.13869	134.307	127.171	0	4
4.76699	1.74272	1.1353	114.102	127.291	0	4
4.32544	1.74753	1.13843	120.905	137.765	0	4
3.98228	1.59547	1.03937	111.264	136.274	0	4
4.31174	2.03543	1.32598	111.901	140.298	0	4
4.42683	1.31098	0.854037	140.311	131.57	0	4
4.63489	2.68357	1.74822	128.857	133.331	0	4
3.54386	0.87594	0.570632	88.3195	135.732	0	4
4.67072	1.87449	1.22114	112.918	135.416	0	4
4.50633	1.51424	0.986454	107.427	136.946	0	4
4.96262	1.82555	1.18925	111.526	134.085	0	4
4.23438	1.64844	1.07388	104.316	136.866	0	4
[truncated: 8,751 more rows]
