# Supplementary material for: The pattern of nodal morphogen signaling is shaped by co-receptor expression
Source: eLife. 2021 May 26;10:e54894. doi: 10.7554/eLife.54894 (PMC8266389; doi:10.7554/eLife.54894)
Supplement: Figure 3—source data 4. — The quantified fluorescence intensities are organized in this table. Each row corresponds to an individual nucleus. The following characteristics were quantified: average GFP pixel intensity (‘GFP’), average pixel intensity for α-pSmad2 staining (‘pSmad2Raw’), α-pSmad2 staining intensity normalized to background (‘pSmad2 Normalized’), average DAPI pixel intensity (‘DAPI’), distance from the embryonic margin in μm (‘marginDist’), GFP staining status (‘GFP_Flag’, 0 denotes a cell host nucleus, one denotes a sensor cell nucleus), and embryo replicate number (‘Embryo Number’). We note that normalized α-pSmad2 staining was used to generate the figure panel. [file elife-54894-fig3-data4.xlsx]

## Sheet: Sheet1
GFP	pSmad2Raw	pSmad2Normalized	DAPI	marginDist	GFP_Flag	EmbryoNumber
42.188	2.34025	3.93599	54.7486	129.889	1	1
44.2801	3.06224	5.15028	64.2448	98.7687	1	1
62.9123	4.89376	8.23065	76.7487	96.7956	1	1
39.304	2.29254	3.85575	143.535	75.6185	1	1
35.8456	5.84993	9.8388	76.9942	68	1	1
28.4553	2.44968	4.12004	104.768	67.5471	1	1
34.9097	12.6559	21.2856	86.8559	61.366	1	1
43.8737	12.7229	21.3983	103.157	59.8265	1	1
38.3877	13.4043	22.5443	101.918	47.4175	1	1
21.27	4.58216	7.70659	99.2399	36.4371	1	1
48.4811	7.36581	12.3883	124.36	24.82	1	1
52.4834	30.0287	50.5043	85.9652	3.8766	1	1
37.7763	2.1581	3.62963	59.4113	121.848	1	1
36.0248	4.62507	7.77876	98.4678	69.0158	1	1
49.8693	7.55252	12.7023	94.1679	66.2799	1	1
30.8253	2.71185	4.56098	96.1894	49.6505	1	1
48.637	15.0059	25.2379	89.2818	33.8671	1	1
48.8217	15.1566	25.4913	90.3657	33.8176	1	1
41.2616	7.04636	11.851	101.75	17.2732	1	1
63.1377	28.1668	47.3728	88.9417	6.49569	1	1
31.1137	2.51951	4.23748	55.4125	113.912	1	1
19.1371	0.737143	1.23978	68.9314	82.8101	1	1
28.4927	1.38436	2.3283	81.0994	74.1831	1	1
31.2855	4.86832	8.18786	71.8957	63.58	1	1
14.4714	6.25	10.5117	67.2082	49.1203	1	1
49.7099	14.0762	23.6742	74.6029	50.3062	1	1
42.2955	3.93518	6.61844	51.2088	102.218	1	1
16.0822	0.884495	1.4876	65.4766	72.1089	1	1
16.9008	0.904474	1.5212	78.6723	60.8153	1	1
38.6589	9.30807	15.6549	70.9108	46.92	1	1
37.7631	1.77069	2.97807	51.8363	147.491	1	1
33.4564	1.67614	2.81904	60.34	106.42	1	1
46.25	6.58611	11.077	90.3556	84.1059	1	1
14.2551	0.77283	1.2998	73.4581	69.36	1	1
55.1121	14.6682	24.67	121.555	45.2953	1	1
30.4953	6.09125	10.2447	104.549	24.48	1	1
10.4047	0.564576	0.949541	62.7454	124.596	1	1
17.3153	1.11648	1.87777	55.4176	110.509	1	1
37.9095	2.50539	4.21373	97.5862	76.7233	1	1
13.519	1.16732	1.96328	75.7255	61.2	1	1
14.874	13.0354	21.9239	71.0761	57.318	1	1
36.1608	14.5481	24.468	76.5787	61.5184	1	1
42.4899	19.1357	32.1837	104.912	40.46	1	1
33.2	5.90308	9.92819	86.5677	21.42	1	1
11.2754	1.58027	2.6578	47.4521	125.217	1	1
12.9861	0.805285	1.35438	54.9791	116.362	1	1
37.5019	9.4717	15.9301	75.8792	83.3694	1	1
43.8091	11.0894	18.6509	67.9697	46.8226	1	1
27.5274	16.9701	28.5415	93.7264	51.6487	1	1
39.1032	15.1595	25.4962	71.2852	46.92	1	1
19.2025	1.84938	3.11042	51.6198	29.92	1	1
3.86813	0.616117	1.03623	39.841	205.772	0	1
4.16069	0.528861	0.889474	40.4852	213.539	0	1
3.70461	0.413279	0.69508	72.4444	211.598	0	1
4.19196	0.735409	1.23686	44.9611	212.082	0	1
3.83747	0.604555	1.01678	40.5797	209.842	0	1
4.35942	0.615942	1.03593	51.7884	200.585	0	1
4.48341	0.687204	1.15579	44.6114	205.7	0	1
4.09233	0.522757	0.879207	48.5397	193.705	0	1
4.59878	0.645122	1.08501	48.0915	192.907	0	1
4.81965	0.947214	1.59309	44.7801	188.953	0	1
4.16331	0.454931	0.765133	39.5546	192.289	0	1
4.67857	0.924603	1.55506	51.0119	205.194	0	1
4.34098	0.527869	0.887805	44.377	200.486	0	1
4.92664	0.774131	1.30199	48.2876	193.317	0	1
4.27925	0.556942	0.936703	46.0343	201.964	0	1
4.26523	0.598566	1.00671	49.8477	184.526	0	1
4.48081	0.781818	1.31491	50.3556	189.271	0	1
4.6323	0.701031	1.17904	48.4536	187.061	0	1
4.33415	0.63145	1.06201	44.7862	195.5	0	1
4.53741	0.60771	1.02209	44.8526	195.5	0	1
4.3622	0.598425	1.00647	44.5197	192.873	0	1
4.18033	0.57079	0.959992	43.8569	182.646	0	1
4.36735	0.584184	0.982519	42.7181	198.439	0	1
4.28748	0.703704	1.18354	42.9541	178.754	0	1
4.18182	0.510823	0.859135	39.8355	195.363	0	1
4.33049	0.481876	0.810452	51.9296	184.756	0	1
4.45305	0.464789	0.781713	41.4296	192.337	0	1
4.85171	0.7979	1.34196	52.7625	173.693	0	1
4.41315	0.591549	0.994907	43.6354	192.445	0	1
4.32994	0.757267	1.27362	51.7297	180.76	0	1
4.30435	0.49913	0.839471	55.0278	176.575	0	1
4.79015	0.863139	1.45168	54.7336	186.081	0	1
4.10127	0.40868	0.687345	49.6528	186.174	0	1
4.33449	0.828107	1.39277	46.8281	182.423	0	1
4.63514	0.793139	1.33395	50.079	176.723	0	1
3.99726	0.4829	0.812174	46.1847	172.384	0	1
4.62571	0.625709	1.05236	58.1267	187.371	0	1
4.70093	0.446262	0.750553	51.0514	181.56	0	1
4.57642	0.5	0.840933	45.238	180.712	0	1
4.98201	0.62982	1.05927	49.4756	169.058	0	1
4.74133	0.758671	1.27598	56.7168	179.331	0	1
4.75867	0.660633	1.1111	55.3439	183.538	0	1
4.60541	0.660811	1.1114	55.3108	179.976	0	1
3.75824	0.522763	0.879218	48.1586	163.923	0	1
4.59216	0.608666	1.02369	48.6575	178.196	0	1
4.62982	0.54386	0.914699	50.614	162.378	0	1
4.22291	0.479876	0.807088	51.144	172.04	0	1
4.80571	0.577143	0.970677	49.5171	159.965	0	1
4.88469	0.73535	1.23676	65.5936	163.642	0	1
4.92869	0.708266	1.19121	64.4992	168.806	0	1
4.07816	0.466501	0.784593	51.9268	169.134	0	1
4.92079	0.60066	1.01023	54.3531	173.3	0	1
4.625	0.568396	0.955967	51.5696	170.419	0	1
4.33045	0.509901	0.857585	52.5408	172.265	0	1
5.00916	0.807592	1.35826	54.462	161.087	0	1
4.38575	0.74095	1.24618	51.7941	159.244	0	1
4.74095	0.699095	1.17578	61.9287	164.22	0	1
4.39458	0.545181	0.916921	48.4729	151.199	0	1
4.79131	0.585042	0.983963	61.6212	164.303	0	1
4.24691	0.519753	0.874155	49.2741	160.82	0	1
4.74612	0.507752	0.853971	57.1395	165.986	0	1
4.73362	0.639738	1.07595	70.0677	159.669	0	1
4.53763	0.523297	0.880117	56.4319	161.26	0	1
4.8551	0.495918	0.834069	53.1551	147.967	0	1
4.40659	0.386185	0.649512	51.3328	144.769	0	1
4.90793	0.604859	1.01729	57.8223	163.111	0	1
4.31461	0.516854	0.869279	93.9888	155.933	0	1
4.25869	0.432545	0.727483	55.8039	151.429	0	1
4.98315	0.625468	1.05195	59.706	145.744	0	1
4.81392	0.677376	1.13926	65.0535	155.176	0	1
4.59219	0.485868	0.817165	56.8385	151.3	0	1
5.04878	0.56848	0.956108	65.4597	154.568	0	1
5.07152	0.780332	1.31241	60.8557	147.063	0	1
4.43367	0.441327	0.742252	75.6403	148.319	0	1
4.18759	0.388167	0.652846	50.6162	138.015	0	1
4.87221	0.578164	0.972394	70.0695	134.369	0	1
5.47037	0.735185	1.23648	69.7167	151.605	0	1
4.00912	0.40146	0.675202	64.0018	142.015	0	1
4.82597	0.605195	1.01786	74.6442	141.545	0	1
4.19959	0.447777	0.753101	46.3764	131.705	0	1
5.05063	0.618987	1.04105	66.2342	145.139	0	1
5.11347	0.512195	0.861444	71.6352	139.485	0	1
4.52507	0.522284	0.878412	61.6337	140.499	0	1
4.36146	0.361465	0.607936	56.4968	137.566	0	1
4.5192	0.470046	0.790555	60.7542	130.957	0	1
4.74588	0.509412	0.856763	61.3482	126.441	0	1
4.55362	0.56276	0.946487	64.458	135.903	0	1
4.70579	0.442879	0.744864	94.9374	120.736	0	1
4.86975	0.545062	0.916721	63.2204	123.249	0	1
4.12417	0.379172	0.637717	57.474	127.021	0	1
5.22466	0.449315	0.755688	69.7123	116.418	0	1
5.3819	0.547461	0.920757	66.245	133.094	0	1
4.97748	0.48048	0.808104	64.2057	127.197	0	1
4.6801	0.442133	0.743608	58.1079	128.815	0	1
4.52198	0.415751	0.699238	74.7527	126.57	0	1
5.15015	0.613003	1.03099	84.4025	124.44	0	1
5.29633	0.531568	0.894027	70.443	124.78	0	1
5.62147	0.551789	0.928036	60.9642	128.366	0	1
5.04961	0.509728	0.857294	67.7062	125.314	0	1
5.48768	0.663732	1.11631	68.4137	107.696	0	1
5.3712	0.397622	0.668747	70.0793	117.947	0	1
5.34014	0.564626	0.949625	63.8617	114.346	0	1
5.48654	0.662526	1.11428	70.8613	117.113	0	1
6.01366	0.817906	1.37561	81.261	122.621	0	1
5.45068	0.538695	0.906013	69.8194	121.855	0	1
5.15594	0.549356	0.923944	70.5508	117.268	0	1
5.45856	0.609116	1.02445	73.5097	123.874	0	1
5.59111	0.566667	0.953058	68.2756	114.92	0	1
5.79412	0.775087	1.30359	80.7059	105.416	0	1
5.46421	0.490239	0.824516	66.2082	101.218	0	1
4.97858	0.528662	0.88914	61.9774	110.048	0	1
5.28364	0.583113	0.980719	69.252	98.2129	0	1
5.77387	0.572864	0.963481	81.2412	108.257	0	1
5.59284	0.623509	1.04866	65.2589	108.805	0	1
5.82323	0.535484	0.900612	81.9832	115.262	0	1
5.41959	0.677146	1.13887	76.4559	103.88	0	1
6.11308	0.626703	1.05403	73.5095	109.441	0	1
5.53134	0.607629	1.02195	101.316	105.249	0	1
4.96081	0.460811	0.775022	66.7797	96.5343	0	1
5.30376	0.67119	1.12885	71.5585	83.9222	0	1
5.54508	0.650273	1.09367	129.081	99.9652	0	1
5.37797	0.598291	1.00624	76.4625	102.335	0	1
5.23803	0.512996	0.862791	72.1696	93.9976	0	1
5.41778	0.487778	0.820377	79.28	82.5605	0	1
5.65877	0.494471	0.831634	78.3523	86.9849	0	1
5.74525	0.576679	0.969898	75.8238	94.4252	0	1
5.38513	0.763612	1.28429	79.2444	91.46	0	1
4.9873	0.531746	0.894326	78.3556	90.78	0	1
5.06839	0.457447	0.769365	80.6657	79.8421	0	1
4.99762	0.517857	0.870967	68.719	82.235	0	1
5.62594	0.74359	1.25062	72.9789	80.1369	0	1
5.88609	0.665468	1.11923	87.7374	86.4971	0	1
5.88249	0.633641	1.0657	66.7788	90.7443	0	1
5.71988	0.665663	1.11956	62.6325	82.6543	0	1
6.30714	0.703571	1.18331	89.5089	90.4151	0	1
5.9	0.543478	0.914058	71.213	74.742	0	1
5.9125	0.554688	0.93291	78.1	71.1584	0	1
5.93733	0.888579	1.49447	82.461	75.4042	0	1
5.52743	0.651195	1.09522	81.3263	76.84	0	1
5.25889	0.54623	0.918687	74.6458	62.4435	0	1
5.68565	0.625285	1.05165	85.5023	79.1149	0	1
5.59264	0.554534	0.932651	93.7674	60.2482	0	1
4.95923	0.50051	0.841791	61.6259	68.9831	0	1
6.08646	0.639769	1.07601	82.6844	64.8411	0	1
6.59423	0.732692	1.23229	91.7423	77.2227	0	1
5.59446	0.637577	1.07232	84.0544	65.0973	0	1
7.20875	0.727273	1.22318	81.2323	67.8783	0	1
5.80276	0.560302	0.942352	78.7802	51.4828	0	1
6.49891	0.636166	1.06995	82.4357	62.4435	0	1
6.47135	0.726361	1.22164	84.3782	55.1848	0	1
5.34121	0.713934	1.20074	73.228	49.3562	0	1
6.74592	0.780399	1.31253	85.412	58.7325	0	1
5.31126	0.749669	1.26084	79.2689	57.822	0	1
6.07886	0.64143	1.0788	92.9674	60.8638	0	1
5.85844	0.667532	1.1227	88.9675	44.623	0	1
5.97596	0.658152	1.10692	92.8565	49.3949	0	1
6.73789	1.2773	2.14825	88.3609	53.38	0	1
6.14269	0.657074	1.10511	86.4161	46.3611	0	1
5.93951	0.904938	1.52199	99.192	60.6964	0	1
7.02927	0.885366	1.48907	92.7305	52.992	0	1
7.29966	0.961279	1.61674	89.4798	51.7091	0	1
7.00091	0.900547	1.5146	92.448	48.1757	0	1
5.91917	0.65127	1.09535	96.5866	38.8925	0	1
6.42067	0.77147	1.29751	84.2213	52.8446	0	1
5.69331	0.755576	1.27078	84.4981	30.0164	0	1
6.09792	0.606825	1.0206	78.3605	40.0248	0	1
6.10382	0.763975	1.2849	84.7205	47.9508	0	1
6.05365	0.689498	1.15964	104.608	33.7851	0	1
6.25048	0.795411	1.33778	83.7438	38.5417	0	1
5.93122	0.686382	1.1544	86.3865	38.766	0	1
6.89568	1.01043	1.69941	83.2936	38.7615	0	1
5.5425	0.618238	1.03979	81.5781	29.9374	0	1
6.08783	0.650503	1.09406	95.1802	29.5174	0	1
6.10102	0.656122	1.10351	95.4714	32.7708	0	1
6.33442	0.756494	1.27232	64.3961	10.3575	0	1
6.27641	0.819542	1.37836	94.3257	28.5134	0	1
5.19674	0.652646	1.09766	123.288	8.08171	0	1
6.91254	0.942244	1.58473	86.9125	17.0543	0	1
5.74695	0.760908	1.27974	100.124	12.92	0	1
6.41641	0.882051	1.48349	105.113	21.2792	0	1
6.46073	0.737728	1.24076	93.3352	15.2053	0	1
6.14443	0.86795	1.45978	133.703	9.52	0	1
6.63863	0.865065	1.45492	105.326	17.3367	0	1
6.64781	0.809762	1.36191	97.0394	4.72343	0	1
5.70115	0.788177	1.32561	108.026	8.66833	0	1
5.28593	0.705185	1.18603	100.332	6.49569	0	1
3.79196	0.431345	0.725465	33.9653	194.341	0	1
4.25977	0.762926	1.28314	41.7995	202.78	0	1
4.09987	0.692308	1.16437	39.9501	197.092	0	1
4.02058	0.59808	1.00589	44.5871	188.679	0	1
3.95912	0.522013	0.877956	39.4371	190.953	0	1
4.59038	0.854227	1.4367	45.2857	194.65	0	1
4.17018	0.622691	1.04728	42.715	191.779	0	1
3.99607	0.45288	0.761683	68.1636	189.266	0	1
4.32806	0.666187	1.12044	52.7914	182.014	0	1
3.94633	0.435028	0.731659	65.4138	179.18	0	1
4.25446	0.574777	0.966698	44.0167	173.357	0	1
4.37189	0.652973	1.09821	54.8735	175.121	0	1
4.14009	0.471889	0.793655	45.8885	167.413	0	1
4.21776	0.546064	0.918406	50.5528	163.397	0	1
4.21639	0.434059	0.730029	43.8796	156.565	0	1
4.4351	0.444444	0.747496	56.7601	148.58	0	1
4.66844	0.525586	0.883966	53.2164	147.309	0	1
4.58172	0.459834	0.773379	57.0485	142.127	0	1
4.41044	0.405694	0.682323	85.7711	138.72	0	1
4.49571	0.360515	0.606338	78.7554	129.054	0	1
4.33333	0.437768	0.736268	50.9328	114.649	0	1
4.60959	0.462329	0.777575	62.9897	125.769	0	1
5.0358	0.516166	0.868123	61.7587	134.695	0	1
4.9366	0.564593	0.949571	65.7416	113.432	0	1
4.76823	0.482639	0.811734	62.217	119.684	0	1
5.04335	0.75665	1.27258	64.4246	103.255	0	1
4.77727	0.531818	0.894447	68.1466	115.548	0	1
4.73878	0.485714	0.816907	64.7112	110.389	0	1
5.02174	0.47259	0.794833	68.5491	116.34	0	1
4.82883	0.478604	0.804947	60.1171	105.805	0	1
5.75991	0.694934	1.16879	79.0892	103.624	0	1
4.60342	0.457232	0.769003	65.3359	99.9652	0	1
5.08343	0.643105	1.08162	65.7822	97.8143	0	1
4.82182	0.453039	0.761951	65.7749	94.8606	0	1
5.07372	0.63258	1.06392	75.3722	78.6055	0	1
5.8698	0.642232	1.08015	76.1772	85.0979	0	1
5.55822	0.618063	1.0395	85.6279	89.8282	0	1
5.15321	0.557971	0.938433	72.0197	71.5981	0	1
4.71623	0.463445	0.779452	64.5774	77.52	0	1
5.10361	0.418251	0.703442	69.9924	70.334	0	1
5.2097	0.787879	1.32511	65.9624	69.7622	0	1
5.24828	0.521478	0.877056	78.2302	54.4987	0	1
5.06732	0.56333	0.947447	62.7334	62.0255	0	1
5.21043	0.526075	0.884788	78.7694	54.9592	0	1
5.26606	0.495413	0.833218	84.8206	40.875	0	1
5.55054	0.617204	1.03806	71.4344	46.401	0	1
5.42817	0.646009	1.0865	78.1775	38.6061	0	1
5.55205	0.508532	0.855284	89.7039	38.7212	0	1
5.61522	1.28081	2.15416	79.3708	42.09	0	1
5.14606	0.590618	0.993341	85.4275	30.8071	0	1
6.43757	0.599767	1.00873	90.6768	29.0456	0	1
5.63163	0.572917	0.963569	79.0076	28.6771	0	1
6.97247	0.867841	1.45959	116.355	3.5497	0	1
5.67508	0.824395	1.38652	99.2629	16.6704	0	1
5.88013	0.651498	1.09573	67.4018	2.58936	0	1
5.70806	0.689542	1.15972	83.1198	13.3599	0	1
4.09039	0.661327	1.11226	38.2494	203.401	0	1
4.12855	0.671177	1.12883	40.0785	198.402	0	1
3.65082	0.649397	1.0922	42.1718	186.386	0	1
4	0.476589	0.801559	37.1639	188.331	0	1
3.83082	0.468278	0.787581	51.3414	193.12	0	1
4.07131	0.54063	0.909268	37.9784	188.703	0	1
4.14352	0.576429	0.969477	39.9323	181.276	0	1
3.96807	0.409289	0.688369	76.4267	175.481	0	1
4.10327	0.604534	1.01675	44.9685	158.106	0	1
4.75431	0.66092	1.11158	53.4109	161.633	0	1
3.86556	0.342296	0.575696	69.8893	156.947	0	1
3.8105	0.417881	0.702821	55.3722	160.872	0	1
4.23325	0.546392	0.918958	49.018	154.469	0	1
4.22865	0.549822	0.924727	58.6815	142.33	0	1
4.52156	0.511294	0.859928	45.5945	150.789	0	1
3.80293	0.394137	0.662886	51.2231	148.843	0	1
4.12762	0.410839	0.690977	57.1014	147.297	0	1
4.19362	0.353075	0.593825	76.0273	141.938	0	1
4.47134	0.573123	0.963916	52.8053	138.668	0	1
3.88429	0.327143	0.550211	66.4471	143.005	0	1
4.40518	0.405184	0.681466	55.6112	133.038	0	1
4.39653	0.426869	0.717937	52.6067	132.628	0	1
4.55963	0.423547	0.71235	57.2324	129.179	0	1
5.16777	0.525386	0.88363	60.489	112.907	0	1
4.82811	0.491844	0.827217	63.3902	85.9333	0	1
5.16827	0.650392	1.09387	69.7297	91.7383	0	1
4.9532	0.538813	0.906211	80.266	93.4907	0	1
5.15715	0.581472	0.977959	63.2233	75.9959	0	1
4.88621	0.48046	0.808069	80.1345	79.9586	0	1
5.09452	0.561437	0.944262	72.3242	58.0883	0	1
5.19961	0.505814	0.850712	84.343	44.8864	0	1
5.13705	0.572779	0.963338	69.8733	32.8747	0	1
5.74197	0.640257	1.07683	115.043	32.98	0	1
5.61711	0.757995	1.27485	76.8297	24.257	0	1
5.6751	0.631158	1.06152	103.045	23.9959	0	1
4.19266	0.576453	0.969516	43.9755	184.791	0	1
4.52787	0.631966	1.06288	47.3039	156.194	0	1
4.37967	0.459112	0.772165	46.2862	165.586	0	1
4.62847	0.46412	0.780589	56.6053	138.581	0	1
4.44995	0.575818	0.968448	54.4688	127.427	0	1
4.65856	0.529183	0.890015	60.0525	122.368	0	1
4.80437	0.580328	0.976034	60.4973	102.732	0	1
4.75263	0.421237	0.708464	57.4656	97.9678	0	1
4.93536	0.864838	1.45454	60.1156	87.5888	0	1
4.49671	0.459921	0.773526	55.5151	99.4301	0	1
5.26625	0.5387	0.906021	83.3406	93.5099	0	1
4.48525	0.457227	0.768995	68.3982	90.8074	0	1
5.53224	0.61309	1.03113	78.6718	34.8463	0	1
5.70626	0.599275	1.0079	84.2312	28.3508	0	1
4.34709	0.510922	0.859303	68.6092	13.6847	0	1
5.86396	0.788832	1.32671	91.264	2.58936	0	1
5.20329	0.7577	1.27435	112.142	12.2824	0	1
4.16862	0.555035	0.933495	38.3934	200.198	0	1
3.95671	0.593453	0.998109	34.2091	203.531	0	1
3.97165	0.385827	0.648909	41.3575	161.308	0	1
3.95332	0.509828	0.857463	45.1757	158.018	0	1
4.20647	0.868613	1.46089	49.7018	143.769	0	1
4.19412	0.501574	0.843581	47.0168	146.896	0	1
4.14809	0.396947	0.667611	49.0779	134.493	0	1
4.17996	0.585993	0.985562	55.2996	133.081	0	1
3.956	0.338	0.568471	69.719	124.156	0	1
4.41753	0.402062	0.676214	59.3376	105.201	0	1
4.69619	0.563901	0.948407	69.2567	108.456	0	1
4.78695	0.628079	1.05634	56.0062	93.8264	0	1
4.80381	0.631429	1.06198	60.6829	90.44	0	1
4.97103	0.645423	1.08552	82.394	79.1441	0	1
5.0496	0.68254	1.14794	64.7569	67.0912	0	1
4.44708	0.550756	0.926298	60.1717	62.8448	0	1
5.74197	0.659639	1.10942	85.9287	74.4383	0	1
5.03184	0.636704	1.07085	67.7313	62.1986	0	1
5.21255	0.666667	1.12124	68.4448	66.17	0	1
5.27934	0.735969	1.2378	70.125	59.4757	0	1
5.20773	0.48599	0.817371	72.0937	51.5019	0	1
7.36606	0.873544	1.46918	133.484	57.0268	0	1
5.22134	0.619929	1.04264	84.9771	38.9593	0	1
5.37053	0.704446	1.18478	89.2772	36.935	0	1
6.27143	0.619481	1.04188	134.813	21.0745	0	1
5.35305	0.686069	1.15388	76.6479	7.00103	0	1
5.65673	0.637969	1.07298	82.7969	25.2723	0	1
5.06818	0.723776	1.2173	102.086	5.1	0	1
3.79632	0.534823	0.8995	33.933	198.98	0	1
4.07371	0.604423	1.01656	34.9705	208.919	0	1
3.91237	0.560137	0.942076	33.012	204.68	0	1
3.9457	0.753394	1.26711	41.819	176.493	0	1
3.90986	0.453125	0.762096	61.4916	172.552	0	1
4.6057	0.637181	1.07165	56.8801	152.609	0	1
3.91525	0.487288	0.819554	58.7691	141.233	0	1
4.14267	0.484293	0.814517	52.8822	138.05	0	1
3.85902	0.406557	0.683775	51.3623	121.395	0	1
4.32845	0.683054	1.14881	54.2897	116.449	0	1
4.38874	0.414835	0.697697	56.9176	99.982	0	1
4.36957	0.484472	0.814817	55.7438	99.28	0	1
4.85377	0.660245	1.11044	70.028	76.4335	0	1
5.03583	0.7514	1.26375	68.8656	70.04	0	1
4.49551	0.512463	0.861894	66.5633	56.7342	0	1
5.02245	0.593078	0.997477	79.0973	45.9654	0	1
4.58553	0.554535	0.932654	70.876	46.022	0	1
5.31745	0.611058	1.02772	76.0238	47.1633	0	1
5.06405	0.696281	1.17105	78.9432	31.0724	0	1
5.12592	0.746944	1.25626	79.6993	18.3726	0	1
5.29646	0.60043	1.00984	80.2105	14.3325	0	1
6.39082	0.712159	1.19776	98.8387	21.4631	0	1
5.59364	0.722154	1.21457	78.7013	5.44	0	1
5.46057	0.772871	1.29987	98.5741	16.5451	0	1
6.27601	0.847134	1.42477	102.976	12.4692	0	1
3.90013	0.552529	0.92928	43.8106	179.188	0	1
4.01182	0.506757	0.852297	46.4611	173.86	0	1
4.06707	0.577236	0.970834	40.2866	162.072	0	1
3.94845	0.523711	0.880813	46.8763	158.864	0	1
3.76872	0.540765	0.909495	45.8968	165.234	0	1
4.08774	0.36333	0.611072	64.4634	127.631	0	1
4.34819	0.401114	0.674621	58.2047	116.441	0	1
4.21245	0.51073	0.858979	66.6524	110.801	0	1
3.7982	0.372973	0.627291	53.2324	97.5806	0	1
4.12934	0.627413	1.05523	65.2838	88.0987	0	1
4.30796	0.632319	1.06348	58.7389	66.4811	0	1
4.17609	0.361957	0.608763	58.5424	76.6871	0	1
4.36863	0.501961	0.844231	59.983	71.3968	0	1
5.43427	0.952733	1.60237	77.5583	83.3694	0	1
4.99116	0.652778	1.09789	75.4722	70.2016	0	1
4.71487	0.712142	1.19773	70.4393	77.3177	0	1
3.98671	0.490399	0.824785	60.0089	54.0985	0	1
4.63804	0.776074	1.30525	66.0291	63.4444	0	1
4.98958	0.570312	0.95919	69.4648	65.1675	0	1
4.71607	0.535101	0.899969	73.1794	58.0246	0	1
4.10511	0.456934	0.768503	102.639	44.7278	0	1
5.55269	0.925059	1.55583	94.7049	17.4065	0	1
4.40535	0.906459	1.52454	99.5323	6.45105	0	1
4.9219	0.563459	0.947663	76.6332	15.7725	0	1
4.61892	0.812162	1.36595	84.8203	19.5256	0	1
5.47468	1.01582	1.70848	106.522	14.96	0	1
3.26872	0.471366	0.792774	50.7709	178.5	0	1
3.70362	0.405117	0.681353	42.8358	110.098	0	1
4.1336	0.491903	0.827315	57.6802	95.2206	0	1
4.20306	0.934498	1.5717	53.7795	89.1526	0	1
4.12869	0.556962	0.936736	53.4473	99.5364	0	1
5.2734	0.839901	1.4126	86.9015	79.9	0	1
4.24202	0.405042	0.681227	60.3832	46.0119	0	1
4.35441	0.555556	0.93437	68.023	27.2191	0	1
4.07295	0.595745	1.00196	56.9878	25.1531	0	1
4.49786	0.666667	1.12124	66.4915	30.6679	0	1
4.59486	0.565217	0.95062	72.8992	27.8406	0	1
4.02296	0.477041	0.802319	80.4719	19.8252	0	1
5.39056	0.89485	1.50502	71.1953	23.1824	0	1
4.72035	0.60531	1.01805	74.3469	21.1238	0	1
5.1126	2.6756	4.50001	75.6032	26.0228	0	1
4.59763	0.708087	1.19091	74.4793	18.02	0	1
5.08014	0.770035	1.2951	82.3118	17.34	0	1
4.81289	0.64657	1.08744	63.8649	10.3239	0	1
4.63068	0.757576	1.27414	80.928	10.7517	0	1
49.4615	1.59801	1.06534	39.3995	205.052	1	2
71.3526	1.42947	0.952976	38.0768	170.504	1	2
52.5891	1.50469	1.00312	41.0938	158.698	1	2
35.5922	0.965517	0.643675	31.3103	103.716	1	2
47.5364	1.50769	1.00512	47.1397	57.9448	1	2
69.6921	1.37466	0.916435	29.8624	221.92	1	2
51.1517	2.14414	1.42942	28.2988	225.771	1	2
55.8452	1.38356	0.92237	28.6342	202.857	1	2
11.12	3.99304	2.66202	34.9443	170.071	1	2
8.68203	0.860095	0.573394	28.4054	160.858	1	2
50.1503	1.21338	0.808919	30.298	160.044	1	2
38.639	1.10383	0.735886	31.8642	105.153	1	2
36.5864	1.68188	1.12125	25.6515	214.706	1	2
59.0471	1.47336	0.982236	33.9467	137.616	1	2
33.8472	1.37346	0.915633	38.3812	150.501	1	2
53.8684	1.95683	1.30455	46.9764	99.4667	1	2
79.5313	1.64263	1.09508	43.0626	88.218	1	2
46.666	1.64552	1.09701	27.0187	218.488	1	2
9.46262	1.06065	0.707096	28.0606	158.22	1	2
50.4046	1.31664	0.877758	33.5129	145.609	1	2
27	1.19435	0.796227	27.7739	140.479	1	2
6.50746	1.26652	0.844346	23.0405	204.596	1	2
6.743	1.35878	0.905848	22.2163	210.691	1	2
54.4406	1.28411	0.856066	34.3504	148.282	1	2
30.8578	1.02098	0.680649	34.2098	177.48	1	2
40.638	0.923313	0.615539	39.3528	184.658	1	2
10.2535	2.17414	1.44942	33.1178	107.655	1	2
54.3198	1.74174	1.16116	24.9234	215.759	1	2
48.2	1.38481	0.923202	37.362	119.162	1	2
70.9104	1.40779	0.938524	29.6078	182.267	1	2
52.2162	1.51989	1.01326	34.5477	107.595	1	2
6.83791	1.40659	0.937724	24.3269	190.74	1	2
30.8199	1.89711	1.26473	32.9614	216.986	1	2
41.9112	1.81427	1.20951	33.9838	142.33	1	2
24.5047	1.93574	1.29048	38.2806	164.1	1	2
15.1833	1.83503	1.22335	26.9267	200.795	1	2
70.8434	1.73061	1.15373	41.4485	138.964	1	2
65.9789	1.65378	1.10251	30.0053	177.422	1	2
40.3194	0.942708	0.628469	51.1233	105.293	1	2
34.2093	1.8252	1.2168	31.1341	194.405	1	2
19.9871	1.72878	1.15252	34.0498	148.74	1	2
6.21289	2.55622	1.70414	50.3733	77.5319	0	2
4.35281	0.649351	0.432898	47.6126	144.942	0	2
4.47045	1.48409	0.989389	39.8932	215.969	0	2
5.83967	2.37228	1.58151	46.8071	102.566	0	2
4.746	2.468	1.64533	37.354	183.714	0	2
4.73108	1.71315	1.14209	37.1873	178.027	0	2
4.93961	2.91304	1.94202	36.3671	198.734	0	2
5.02724	1.23735	0.824899	40.8191	140.941	0	2
4.87603	0.960331	0.640217	77.9124	56.6536	0	2
5.21455	1.17818	0.785451	45.0764	87.3648	0	2
5.10333	2.61164	1.74108	42.5986	122.291	0	2
5.65803	1.14508	0.763381	54.5285	46.7583	0	2
5.47022	1.3511	0.900727	46.1348	83.2882	0	2
5.28245	3.24076	2.16049	41.7057	126.847	0	2
5.67929	1.47216	0.981435	43.5033	103.78	0	2
5.21333	1.85333	1.23555	35.8578	176.97	0	2
5.27127	2.13644	1.42428	41.2327	136.477	0	2
5.10714	1.78125	1.18749	43.2254	113.853	0	2
4.19718	1.07394	0.715959	36.1831	206.887	0	2
5.49222	2.14202	1.42801	43.4086	157.08	0	2
4.89339	1.63563	1.09041	35.7611	167.28	0	2
5.54331	1.85958	1.23971	74.0906	40.46	0	2
5.8575	1.41	0.939995	44.2488	62.22	0	2
4.78266	2.17582	1.45054	36.1001	146.2	0	2
4.47278	2.71347	1.80897	32.7178	219.3	0	2
5.0081	2.55592	1.70394	39.7374	167.961	0	2
5.10136	1.18789	0.79192	52.6168	104.415	0	2
5.20781	2.29847	1.5323	37.7838	139.978	0	2
5.61339	1.47084	0.980557	74.8575	61.5052	0	2
6.12526	1.69729	1.13152	48.3695	72.0303	0	2
4.34417	1.73171	1.15447	36.2222	189.49	0	2
5.15848	1.57369	1.04912	41.9651	97.4775	0	2
4.751	1.46215	0.974763	30.3765	180.57	0	2
5.12454	1.9072	1.27146	38.4078	114.113	0	2
4.96842	1.94526	1.29684	33.9516	145.984	0	2
4.97564	1.81055	1.20703	38.1394	178.124	0	2
4.47361	1.34583	0.897218	41.2764	130.988	0	2
4.01226	1.91944	1.27962	34.3065	167.466	0	2
5.01333	1.82333	1.21555	36.505	156.501	0	2
5.21543	1.19796	0.798638	40.3028	117.953	0	2
5.89485	1.48322	0.988809	61.6779	34.635	0	2
5.62089	1.91559	1.27706	46.5494	94.0867	0	2
4.57599	1.70669	1.13779	31.6824	168.58	0	2
4.14458	0.616867	0.411243	55.3446	199.161	0	2
4.76134	1.84221	1.22813	31.856	227.517	0	2
6.3032	2.14689	1.43125	56.6384	60.0338	0	2
5.11201	1.55466	1.03643	33.4305	137.095	0	2
4.64432	2.18063	1.45375	33.8734	183.068	0	2
5.35294	0.930283	0.620186	39.7429	110.636	0	2
4.21151	1.15708	0.77138	41.7107	209.665	0	2
5.20808	2.62222	1.74814	38.2404	141.91	0	2
6.43223	1.99817	1.33211	53.033	69.5173	0	2
6.98379	1.86224	1.24149	65.2707	45.2813	0	2
4.35526	0.664474	0.44298	30.5921	189.037	0	2
4.6392	1.93987	1.29324	34.3563	174.374	0	2
5.01869	1.90521	1.27013	37.8892	144.391	0	2
4.45779	1.53348	1.02231	30.0626	203.773	0	2
5.2616	1.282	0.854665	41.6976	131.611	0	2
5.69304	1.54161	1.02773	57.3465	43.9968	0	2
6.04989	1.45336	0.968903	77.2777	9.73612	0	2
4.86769	2.78462	1.8564	35.4538	183.665	0	2
4.84259	1.78519	1.19012	28.6648	210.959	0	2
5.37066	1.37259	0.915053	38.8822	139.526	0	2
5.61382	2.38618	1.59078	45.7995	76.9708	0	2
4.80357	1.32526	0.883499	36.1467	177.376	0	2
4.375	1.22656	0.817704	29.3125	233.624	0	2
5.13874	1.96396	1.3093	40.8595	165.9	0	2
5.21995	1.40816	0.938771	34.4082	213.578	0	2
7.55603	2.08908	1.39271	66.3305	10.2509	0	2
5.78835	2.0932	1.39546	48.1728	140.115	0	2
4.67177	1.30612	0.870744	30.8571	209.949	0	2
4.78074	1.53279	1.02185	36.2992	162.331	0	2
5.95798	1.80792	1.20528	49.5198	88.0974	0	2
5.67192	2.12598	1.41732	69.916	18.4385	0	2
5.6829	1.59976	1.0665	38.0119	153.678	0	2
6.18644	1.34322	0.895476	44.4364	96.7466	0	2
4.37008	0.830709	0.553803	37.2126	227.486	0	2
5.79381	1.23196	0.821302	53.0893	58.1231	0	2
5.75616	1.67241	1.11494	53.9384	73.1	0	2
4.87947	2.63277	1.75517	31.3992	216.131	0	2
5.72766	2.2766	1.51772	45.6638	116.398	0	2
4.97809	1.30279	0.868522	55.6175	130.093	0	2
4.94105	1.20842	0.80561	32.9937	188.212	0	2
5.14317	1.24078	0.827183	35.4121	179.687	0	2
5.82415	1.06562	0.710408	70.9711	29.139	0	2
5.157	1.16425	0.776164	49.1063	121.197	0	2
5.67071	1.06586	0.710568	50.9983	101.018	0	2
5.21714	2.37905	1.58602	33.2571	174.698	0	2
4.83423	1.42342	0.948944	31.3964	210.41	0	2
5.90698	0.974955	0.649967	45.5832	144.535	0	2
5.90309	1.18158	0.787714	50.8637	49.2449	0	2
6.72549	1.49911	0.999401	53.0321	71.1575	0	2
4.71377	0.923913	0.615939	41.6486	164.827	0	2
6.20948	1.62691	1.0846	57.2859	34.0764	0	2
5.29501	1.47645	0.984298	40.0249	159.925	0	2
5.38824	1.48758	0.991716	48.0771	98.2129	0	2
6.43057	1.88917	1.25944	64.6548	17.552	0	2
6.0677	2.55513	1.70341	53.2553	60.2338	0	2
5.9134	1.41649	0.944325	39.3979	147.182	0	2
5.15027	1.82447	1.21631	40.0519	156.165	0	2
5.35556	1.15043	0.766948	34.7812	173.278	0	2
5.55662	1.52933	1.01955	39.3506	162.724	0	2
5.73501	1.14894	0.765954	34.6132	189.354	0	2
6.09011	1.26154	0.841022	38.2769	138.194	0	2
5.50837	1.36073	0.907149	47.0137	72.1649	0	2
4.86348	0.870567	0.580375	62.945	155.496	0	2
5.17352	0.954338	0.636222	33.1933	163.858	0	2
4.82847	0.933105	0.622067	35.3756	177.27	0	2
5.62423	0.946319	0.630876	98.0859	41.4549	0	2
7.14184	1.98227	1.32151	57.3723	27.5736	0	2
4.88368	1.15994	0.773286	37.9499	207.401	0	2
5.86267	1.5087	1.0058	41.3714	158.1	0	2
5.28085	1.29374	0.862488	41.9429	106.76	0	2
5.19608	0.930147	0.620095	72.2868	64.9542	0	2
5.03781	1.20227	0.801508	44.7202	115.712	0	2
5.43447	1.60331	1.06887	43.2326	123.986	0	2
4.89893	1.3706	0.913727	49.3553	76.8859	0	2
4.8812	1.51326	1.00884	38.293	154.9	0	2
5.53836	1.26289	0.841925	47.2277	105.219	0	2
4.39322	2.37797	1.5853	30.6915	212.557	0	2
4.44792	2.49479	1.66319	36.1823	182.065	0	2
4.76689	2.47466	1.64977	41.9966	164.83	0	2
5.66594	1.42655	0.951029	45.2416	95.4934	0	2
4.76498	1.69448	1.12965	35.1645	153.831	0	2
4.45265	2.53343	1.68894	32.5738	207.095	0	2
5.70566	1.61649	1.07766	52.4161	63.0322	0	2
4.81494	2.06437	1.37624	38.8851	140.193	0	2
4.60357	1.80521	1.20347	32.4925	193.041	0	2
4.36266	1.40773	0.938479	27.912	218.38	0	2
4.81441	0.775109	0.516737	59.7118	74.46	0	2
5.97832	1.59439	1.06292	52.3227	51	0	2
4.81422	1.31987	0.87991	35.0662	117.332	0	2
4.4587	1.22144	0.81429	26.0773	221.085	0	2
5.16221	2.42748	1.61831	37.292	214.929	0	2
4.99587	1.35901	0.906002	35.8776	135.446	0	2
5.30939	1.22099	0.813992	83.1823	39.0941	0	2
4.07048	0.751101	0.500732	42.1322	155.267	0	2
4.06144	2.32873	1.55248	30.8479	187.653	0	2
5.75393	1.3534	0.902264	88.2539	9.4835	0	2
5.57973	1.71351	1.14234	74.8459	37.4386	0	2
4.25899	2.15647	1.43764	37.9748	152.05	0	2
5.33848	1.48736	0.991568	41.8371	106.129	0	2
4.67486	1.77023	1.18015	32.8656	157.504	0	2
6.61563	2.09081	1.39387	61.0676	23.085	0	2
5.21374	1.3715	0.91433	44.1603	99.3417	0	2
4.55348	1.56818	1.04545	31.2112	184.293	0	2
4.79622	1.65066	1.10043	30.559	236.144	0	2
4.69409	1.48523	0.99015	28.9831	223.177	0	2
5.54757	1.51106	1.00737	46.9779	78.8162	0	2
5.27328	2.2004	1.46693	33.7368	182.684	0	2
5.02778	1.04784	0.698556	36.2963	113.817	0	2
4.53727	1.47671	0.984467	28.4596	205.198	0	2
5.25044	1.89317	1.26211	44.289	123.433	0	2
4.75318	1.50763	1.00508	32.4198	189.428	0	2
5.47685	1.70833	1.13888	39.0062	153.784	0	2
4.89756	1.75828	1.17218	30.6696	198.501	0	2
5.06173	1.52263	1.01508	37.6406	131.295	0	2
7.03715	9.44428	6.29615	80.5487	5.201	0	2
5.11111	1.61757	1.07838	40.1344	118.309	0	2
4.82438	1.87156	1.2477	27.2661	220.339	0	2
5.26796	1.3854	0.923599	42.9293	101.667	0	2
5.14024	1.40367	0.935775	37.2136	185.482	0	2
5.76654	1.81907	1.2127	62.463	48.0472	0	2
4.87297	1.4062	0.937465	31.8242	194.275	0	2
4.71795	0.972756	0.648501	28.1154	210.806	0	2
5.72727	1.28708	0.85805	43.8301	108.728	0	2
4.56068	1.16743	0.778286	29.2796	211.713	0	2
7.06044	5.67865	3.78575	81.531	4.72343	0	2
5.33431	2.28175	1.52116	44.4569	70.426	0	2
7.30608	5.45178	3.6345	88.217	6.54003	0	2
4.29318	0.745455	0.496967	38.9273	193.914	0	2
6.24276	1.51225	1.00816	63.0479	23.9308	0	2
6.19727	1.62015	1.08009	53.6936	56.133	0	2
4.61769	1.89207	1.26137	32.3238	163.903	0	2
5.3186	1.6515	1.10099	45.0858	93.7722	0	2
5.87039	2.1275	1.41833	52.6091	42.1394	0	2
5.12936	1.06395	0.709299	62.5901	112.071	0	2
5.41342	1.69262	1.12841	41.9718	107.798	0	2
4.78896	1.48221	0.988134	34.692	143.764	0	2
5.28327	2.74835	1.83223	38.7154	115.968	0	2
4.76026	1.40927	0.93951	35.6013	169.24	0	2
3.8692	1.34318	0.895448	25.5373	202.839	0	2
5.35036	1.7708	1.18053	39.6511	95.6585	0	2
5.07474	1.67053	1.11368	35.2747	153.662	0	2
4.30894	2.47154	1.64769	30.1924	207.06	0	2
4.89108	1.30823	0.872147	35.591	125.8	0	2
4.31176	1.81765	1.21176	27.0074	204.721	0	2
4.55099	2.04533	1.36354	32.7989	171.155	0	2
4.6387	0.767123	0.511413	50.012	184.832	0	2
5.08081	1.40981	0.93987	34.2612	150.434	0	2
4.54611	2.13545	1.42362	30.5303	199.144	0	2
4.50479	2.05112	1.36741	29.5479	169.398	0	2
4.82812	0.883681	0.589117	37.0365	113.575	0	2
4.74156	1.88052	1.25367	33.6247	142.471	0	2
4.45739	1.05398	0.702648	39.4119	217.58	0	2
5.4475	2.18375	1.45583	47.7137	64.5687	0	2
4.56129	1.80968	1.20645	32.5839	173.462	0	2
3.85263	0.95	0.63333	35.6421	224.708	0	2
5.09302	2.15375	1.43582	37.9147	136.782	0	2
5.30172	1.21552	0.810341	70.3831	14.6042	0	2
4.57214	1.78856	1.19237	31.7463	165.505	0	2
5.0825	1.4111	0.940726	40.8151	93.458	0	2
5.67742	10.4184	6.94555	58.5327	3.13464	0	2
4.60807	1.67723	1.11815	32.8372	190.652	0	2
4.71468	2.43073	1.62048	31.7668	170.533	0	2
5.51336	2.70035	1.80022	49.5726	71.0209	0	2
5.36575	1.56604	1.04402	49.6357	28.2282	0	2
5.08546	1.28699	0.857989	40.139	98.7248	0	2
6.19885	1.84368	1.22911	61.7138	13.6678	0	2
5.51801	0.818182	0.545452	57.4991	22.6477	0	2
5.0446	1.16848	0.778985	36.6155	138.2	0	2
5.19339	1.32727	0.884844	38.7884	101.887	0	2
5.59163	0.920319	0.613543	75.0797	23.46	0	2
6.56849	8.32106	5.54735	74.3467	1.36	0	2
5.24943	1.37755	0.918363	38.5669	118.894	0	2
5.96841	1.69137	1.12758	57.6586	43.7795	0	2
4.63959	1.54061	1.02707	34.2297	172.782	0	2
4.51709	1.67949	1.11965	33.1709	162.328	0	2
6.07468	1.26673	0.844483	50.4297	56.7953	0	2
5.18147	1.36802	0.912009	47.4289	37.7829	0	2
4.35343	0.849246	0.566161	46.9816	215.881	0	2
5.18903	1.48773	0.991818	35.9091	137.576	0	2
5.76607	1.30096	0.867301	48.7565	32.7425	0	2
5.29167	1.20476	0.803171	40.119	108.753	0	2
5.22305	1.05988	0.706583	43.3922	69.816	0	2
5.68313	1.28395	0.855963	52.3621	16.3554	0	2
5.57662	1.09481	0.729867	46.4909	40.225	0	2
4.80532	0.747279	0.498184	47.3011	135.934	0	2
4.70798	1.11111	0.740737	27.8348	197.83	0	2
6.84798	4.5123	3.00819	82.3049	5.27822	0	2
6.06054	1.63679	1.09119	55.1711	35.8825	0	2
3.60714	1.85924	1.23949	27.7479	208.127	0	2
4.18456	1.91946	1.27964	35.8456	214.319	0	2
3.47193	1.69647	1.13097	28.9168	198.794	0	2
4.74923	1.48225	0.988164	33.5085	181.672	0	2
5.26127	1.25862	0.839076	44.382	52.4196	0	2
4.2426	1.82934	1.21955	28.7461	197.526	0	2
4.82	1.26833	0.845551	43.09	84.1423	0	2
4.06463	1.91667	1.27777	26.0153	218.253	0	2
4.95288	1.20812	0.805406	38.9607	74.2517	0	2
4.42926	1.60289	1.06859	38.5531	83.3	0	2
5.3689	1.30199	0.867989	52.34	40.46	0	2
4.9975	1.08739	0.724924	39.5755	93.1656	0	2
4.9375	1.61458	1.07638	30.974	210.32	0	2
5.46863	1.39693	0.93128	48.4046	17.1523	0	2
5.91641	1.84608	1.23071	51.8451	28.3426	0	2
4.87669	1.47425	0.982832	35.5054	133.865	0	2
4.90161	2.03012	1.35341	28.9558	218.751	0	2
5.4805	1.45711	0.971401	52.3947	29.9393	0	2
4.78927	1.40741	0.938267	36.083	122.971	0	2
4.15152	0.925408	0.616936	40.4382	154.35	0	2
4.24482	2.48023	1.65348	27.1073	193.125	0	2
4.64583	1.15972	0.773144	30.7865	127.525	0	2
4.3607	1.69062	1.12707	29.4252	178.501	0	2
5.56147	1.13711	0.75807	50.6708	44.72	0	2
4.44964	1.86451	1.243	30.0875	175.917	0	2
5.12633	1.01486	0.676571	38.5849	103.031	0	2
5.41176	1.39052	0.927011	48.1667	53.9015	0	2
5.12655	1.50496	1.0033	43.6849	49.341	0	2
4.74239	1.49493	0.996614	29.7606	217.42	0	2
4.50959	1.36331	0.908868	33.4149	159.495	0	2
4.538	1.82414	1.21609	24.2176	228.112	0	2
4.96223	1.57307	1.04871	29.8604	212.025	0	2
6.00986	1.47102	0.980677	56.9914	29.9084	0	2
5.61661	1.38339	0.922258	46.8144	73.1126	0	2
3.9786	0.737354	0.491567	29.4241	195.294	0	2
4.81013	0.940928	0.627282	30.8903	134.066	0	2
5.26499	0.977685	0.651787	47.1771	53.4849	0	2
5.14093	1.71064	1.14042	51.4288	27.2191	0	2
4.88462	1.54591	1.0306	30.0347	176.803	0	2
5.81588	2.16727	1.44484	57.0542	32.1781	0	2
5.09017	1.5747	1.04979	38.1386	121.827	0	2
5.05496	3.17426	2.11616	36.0576	135.885	0	2
5.50983	1.84971	1.23313	49.1064	73.762	0	2
5.15254	1.96836	1.31223	48.9017	86.4563	0	2
5.43423	1.38048	0.920316	48.1315	53.8017	0	2
4.71369	1.53112	1.02074	33.7704	157.321	0	2
4.41151	0.601279	0.400851	42.548	66.3	0	2
4.25041	1.46341	0.975605	30.0715	194.82	0	2
4.88528	1.1066	0.737733	38.6083	102	0	2
4.03922	2.43505	1.62336	29.5319	198.772	0	2
3.93254	2.55556	1.7037	26.371	185.554	0	2
5.00877	1.15614	0.770756	51.414	8.6014	0	2
4.65241	1.24828	0.83218	32.8386	140.963	0	2
5.09438	1.49213	0.994752	26.1011	230.662	0	2
4.97214	0.927577	0.618381	51.7591	147.009	0	2
4.64912	0.94197	0.627977	34.3414	91.7931	0	2
4.88516	0.982332	0.654885	36.3163	107.466	0	2
4.63006	1.54913	1.03275	29.3545	196.301	0	2
5.15978	0.750689	0.500457	87.8333	32.64	0	2
4.72437	1.18633	0.790882	38.4377	126.096	0	2
4.91551	2.10942	1.40627	50.0097	19.8252	0	2
5.04255	1.15519	0.770126	34.8936	130.085	0	2
5.6829	1.84456	1.2297	68.5212	23.6172	0	2
4.86577	1.70973	1.13982	56.2768	31.0724	0	2
6.20847	1.25503	0.83668	52.7915	45.6728	0	2
5.20246	1.16963	0.77975	34.0287	160.539	0	2
4.95993	3.76685	2.51122	30.5628	217.985	0	2
4.53867	1.95794	1.30529	38.7069	125.55	0	2
5.45384	1.7483	1.16553	53.6093	40.8113	0	2
5.17464	1.38487	0.923244	43.9488	81.4504	0	2
5.04937	1.69805	1.13203	43.9495	89.08	0	2
3.81176	0.623529	0.415684	40.2992	79.56	0	2
4.55	2.17188	1.44791	37.8781	113.9	0	2
5.38547	2.5419	1.69459	52.9088	17.0848	0	2
5.25092	1.70624	1.13749	44.1175	60.8286	0	2
4.97681	1.3015	0.867663	36.6248	87.9345	0	2
5.04243	1.37844	0.918956	53.055	52.7099	0	2
4.96477	1.31311	0.875403	50.8982	65.6869	0	2
4.01338	0.780936	0.520622	40.3428	169.369	0	2
4.81832	1.36189	0.907923	31.8124	153.179	0	2
5.71339	1.45432	0.969541	50.2103	20.3461	0	2
4.87639	1.84786	1.2319	39.2964	108.685	0	2
4.88934	1.35211	0.901404	46.2173	94.553	0	2
6.01305	1.83936	1.22623	54.2249	22.7495	0	2
6.7071	11.4349	7.6232	71.2848	5.14513	0	2
5.03776	4.90291	3.26859	41.5545	79.6391	0	2
5.88305	10.5024	7.00154	88.033	12.3575	0	2
4.54531	1.325	0.883329	29.5516	179.567	0	2
4.7747	1.15078	0.767183	37.4575	121.31	0	2
4.9739	1.45514	0.970088	41.3801	68.728	0	2
5.12137	1.04354	0.695687	43.686	56.2574	0	2
4.49556	1.55595	1.0373	39.9325	99.1985	0	2
5.5539	1.59748	1.06498	48.8796	78.6716	0	2
5.17329	1.70906	1.13937	50.9412	31.8259	0	2
5.70048	1.36038	0.906917	48.9415	71.151	0	2
4.67315	0.682879	0.455251	55.3988	45.6323	0	2
5.10754	0.823239	0.548823	59.042	86.214	0	2
4.62384	0.789404	0.526267	78.4185	63.5836	0	2
5.85521	1.58728	1.05818	56.2896	14.7616	0	2
4.43002	1.44828	0.965513	30.8844	141.63	0	2
4.33413	1.68496	1.1233	29.9523	167.472	0	2
4.98795	2.13521	1.42346	37.7831	118.32	0	2
4.07547	0.684391	0.456258	49.3568	53.72	0	2
4.46708	1.19379	0.795855	33.4857	128.86	0	2
4.75	0.755	0.503331	49.2	155.696	0	2
5.68283	1.95354	1.30235	53.8707	4.472	0	2
4.51872	1.45631	0.970869	34.9196	116.893	0	2
4.56787	1.45828	0.972183	30.7634	144.876	0	2
5.40775	1.23529	0.823525	40.4813	112.015	0	2
4.98879	1.30511	0.870066	41.0909	99.9652	0	2
4.84921	0.986772	0.657845	38.004	118.575	0	2
5.20312	1.4375	0.958329	60.2656	31.1263	0	2
5.5102	8.89618	5.93076	65.3957	8.86611	0	2
5.19235	1.31668	0.877785	43.4495	75.8756	0	2
4.81839	1.57586	1.05057	29.8356	216.306	0	2
5.18182	1.57362	1.04908	42.4558	86.6273	0	2
5.25903	1.4259	0.950597	48.0809	46.0521	0	2
4.85316	0.704461	0.469638	56.6989	45.6981	0	2
5.39107	1.93411	1.2894	36.4729	102.685	0	2
4.20534	1.63244	1.08829	35.191	182.92	0	2
4.40537	0.566443	0.377627	73.5383	50.1543	0	2
5.08486	11.9035	7.93562	83.6705	3.66191	0	2
4.80946	1.83954	1.22636	44.3209	84.2446	0	2
4.08542	4.69375	3.12915	26.5083	196.83	0	2
3.82013	0.826552	0.551032	27.4304	195.859	0	2
4.46667	0.472917	0.315276	66.4833	111.52	0	2
4.21774	1.26344	0.84229	40.2258	142.12	0	2
4.62771	2.13689	1.42459	47.818	24.3332	0	2
5.09312	1.29825	0.865493	48.6478	55.3156	0	2
4.38535	1.09362	0.729078	32.8331	126.898	0	2
4.83573	1.21691	0.811267	46.1675	17.5652	0	2
4.76893	1.60574	1.07049	33.4138	133.436	0	2
4.6867	1.0372	0.691461	40.568	113.387	0	2
4.52198	1.21245	0.808299	33.6062	167.838	0	2
3.84186	0.781395	0.520928	34.9767	184.139	0	2
4.92178	1.02046	0.680302	43.2022	79.5368	0	2
4.96138	1.56059	1.04039	47.7004	38.9593	0	2
4.96855	1.70642	1.13761	44.1704	66.5957	0	2
4.53245	0.905605	0.603734	40.9395	162.53	0	2
5.09586	2.00564	1.33709	56.2763	30.1528	0	2
4.72992	1.63989	1.09325	36.9307	109.263	0	2
5.94737	7.84211	5.22804	68.4808	11.0748	0	2
4.17845	0.84629	0.56419	31.6166	202.609	0	2
4.43737	0.932059	0.62137	29.9575	188.344	0	2
4.77407	1.29782	0.865208	33.0629	144.155	0	2
5.12985	1.38822	0.925475	37.4123	122.472	0	2
4.79539	0.819783	0.546519	46.8631	142.931	0	2
4.66188	1.06699	0.71132	79.7241	36.7735	0	2
4.41121	0.89486	0.59657	63.4766	29.437	0	2
5.08589	2.00767	1.33844	43.7469	94.5206	0	2
4.4129	1.15484	0.769889	40.7306	69.6602	0	2
4.02838	0.70524	0.470158	58.0459	35.7	0	2
4.04684	1.13115	0.754095	24.2881	217.94	0	2
4.73464	1.02211	0.681405	43.7445	143.513	0	2
4.876	1.872	1.24799	41.168	95.8324	0	2
4.89446	1.12976	0.753168	49.8564	33.6119	0	2
4.53577	0.696343	0.464227	61.4483	42.1723	0	2
4.09549	2.0434	1.36226	30.0243	171.848	0	2
4.8507	2.12958	1.41971	42.5606	77.6467	0	2
5.37423	1.12268	0.748447	48.228	64.5758	0	2
5.12357	12.8717	8.58107	66.5428	6.15766	0	2
4.34842	2.49246	1.66163	35.4746	193.104	0	2
5.09756	1.52787	1.01858	45.6638	57.5233	0	2
4.05168	1.37209	0.914724	29.0052	178.179	0	2
4.00383	1.64368	1.09578	52.0153	42.5	0	2
4.69757	1.70185	1.13456	42.97	136.592	0	2
7.7419	13.9938	9.32913	97.1085	15.7505	0	2
4.61521	1.70022	1.13348	60.2394	30.2141	0	2
5.1806	1.28806	0.858702	32.9194	158.723	0	2
4.58156	1.12766	0.751769	47.0095	29.5976	0	2
4.63531	1.34653	0.897685	49.6749	74.5229	0	2
5.0243	1.63738	1.09158	49.6636	20.7845	0	2
4.46735	1.23878	0.825846	32.7204	154.675	0	2
4.33728	1.26331	0.842205	38.5769	64.8982	0	2
4.12295	1.7541	1.16939	47.6093	74.8772	0	2
4.19481	1.5	0.999995	46.8994	62.0628	0	2
4.53231	1.88923	1.25948	42.3077	119.844	0	2
4.19122	0.557994	0.371994	46.3981	47.2612	0	2
3.99569	0.633621	0.422412	38.9353	33.66	0	2
4.41109	1.46845	0.978963	37.6482	87.2794	0	2
5.37288	0.889831	0.593217	52.7669	135.315	0	2
4.73413	1.38095	0.92063	44.3889	62.0293	0	2
4.0235	1.13675	0.757831	35.6731	199.451	0	2
4.81053	1.47158	0.981048	46.1158	43.7069	0	2
4.37989	1.04469	0.696458	37.3762	98.2971	0	2
4.53746	10.1225	6.74829	64.5778	12.5386	0	2
4.69018	1.13804	0.758687	30	206.268	0	2
4.86475	1.95902	1.306	29.6496	216.464	0	2
5.14313	1.49809	0.998723	40.5076	113.92	0	2
4.69178	1.28767	0.858443	41.2785	41.2803	0	2
4.26511	1.98441	1.32293	26.0292	228.699	0	2
3.9555	0.926702	0.617798	29.3586	113.511	0	2
4.52802	1.47414	0.982754	43.8147	49.1779	0	2
4.53252	0.993902	0.662598	44.4573	65.9398	0	2
4.65404	2.25505	1.50336	29.048	195.124	0	2
4.66311	1.01706	0.678035	46.0938	46.4756	0	2
4.79915	1.05342	0.702276	41.1303	83.4774	0	2
4.99715	1.47863	0.98575	53.6268	34.7333	0	2
4.29581	1.11479	0.74319	34.9404	116.835	0	2
4.97593	1.54486	1.0299	45.3042	38.1664	0	2
4.22118	1.58824	1.05882	38.6776	129.719	0	2
4.36961	3.61163	2.40774	53.7505	15.8054	0	2
4.65318	1.23699	0.824659	39.2736	78.6165	0	2
4.68069	1.83174	1.22115	43.3384	113.649	0	2
4.51636	0.552727	0.368483	38.36	52.7658	0	2
11.1332	0.858847	0.767763	47.55	71.2841	1	3
52.7433	1.84408	1.64851	37.2567	153.56	1	3
12.0447	0.810458	0.724505	55.4804	66.4489	1	3
14.9581	0.991892	0.886698	54.5865	84.0797	1	3
60.5309	1.20965	1.08136	28.1448	184.57	1	3
36.2909	1.18968	1.06351	30.3606	153.518	1	3
33.0163	2.62017	2.34229	55.3578	77.3648	1	3
38.7396	1.27273	1.13775	67.7961	111.616	1	3
8.04379	1.2284	1.09813	54.3858	65.546	1	3
53.7862	1.28551	1.14918	60.2726	111.243	1	3
36.9783	1.57609	1.40894	27.368	176.442	1	3
71.2756	1.81192	1.61976	29.6927	156.4	1	3
47.1228	17.2102	15.385	66.7198	61.0222	1	3
3.90987	0.742489	0.663745	20.5579	36.9866	1	3
58.7659	1.6746	1.497	72.9127	113.987	1	3
44.7825	1.37402	1.2283	31.7793	148.897	1	3
47.7295	7.69632	6.8801	55.0356	93.5192	1	3
40.1293	1.40862	1.25923	30.789	179.86	1	3
13.7449	1.35614	1.21232	30.7434	158.69	1	3
20.0115	1.02995	0.920723	24.0207	178.769	1	3
34.3329	3.31132	2.96014	105.608	56.3457	1	3
54.2351	1.92053	1.71685	40.1854	135.476	1	3
53.7795	1.31873	1.17887	24.9592	194.908	1	3
39.5564	1.66911	1.49209	46.3821	118.496	1	3
52.8499	1.34739	1.20449	29.4098	173.748	1	3
15.8771	0.664678	0.594186	67.111	99.9808	1	3
9.90302	1.08863	0.97318	52.3243	101.66	1	3
19.6545	1.15815	1.03532	27.4647	193.73	1	3
27.6274	1.90541	1.70333	31.9305	120.856	1	3
29.7573	1.87967	1.68032	31.6929	133.261	1	3
13.2743	1.02709	0.918161	36.3792	154.832	1	3
29.1673	2.18909	1.95693	46.4	115.393	1	3
66.5119	6.02883	5.38945	58.337	92.5331	1	3
36.1203	1.37629	1.23033	26.5859	178.944	1	3
30.4731	1.76276	1.57581	33.5255	137.886	1	3
36.7452	1.86756	1.6695	38.2447	125.966	1	3
21.1344	1.02967	0.920468	34.6457	156.55	1	3
13.2366	1.15699	1.03429	36.7871	171.945	1	3
37.8286	1.88416	1.68434	40.0177	162.783	1	3
62.2104	1.09778	0.981354	29.1481	165.116	1	3
28.7873	0.966418	0.863925	28.8377	170.435	1	3
36.4782	1.45203	1.29804	34.8823	146.962	1	3
19.6116	1.27769	1.14218	36.276	139.175	1	3
32.3767	1.29708	1.15952	34.2109	164.183	1	3
14.0082	1.73025	1.54675	42.9169	147.299	1	3
41.9573	4.17631	3.73339	64.5702	91.5478	1	3
22.272	1.28027	1.14449	29.4643	161.101	1	3
18.8215	1.11183	0.993914	32.7527	143.198	1	3
30.4617	1.18468	1.05904	34.2342	178.036	1	3
19.0783	1.69348	1.51388	30.2348	155.427	1	3
29.9679	1.6375	1.46384	47.4929	153.279	1	3
4.74662	0.902214	0.806531	46.714	117.984	0	3
4.9233	0.751678	0.671959	75.4535	61.6339	0	3
5.41053	1.11053	0.99275	47.6386	144.897	0	3
5.30653	1.2868	1.15033	40.3005	165.873	0	3
5.074	0.832	0.743763	53.762	113.679	0	3
5.03386	0.782869	0.699842	42.998	137.846	0	3
5.25236	0.96934	0.866537	39.6651	174.534	0	3
4.80053	0.914894	0.817865	64.4468	92.904	0	3
5.19255	1.02484	0.916156	39.5031	150.618	0	3
4.73244	1.10702	0.989619	44.5301	126.989	0	3
5.28321	0.875386	0.782548	53.4109	113.861	0	3
4.63523	0.651246	0.582178	66.6512	84.6163	0	3
4.96436	0.948515	0.847921	34.5644	163.679	0	3
5.19497	0.87631	0.783374	41.5367	149.36	0	3
5.00141	0.940594	0.84084	35.8062	177.383	0	3
4.8766	0.831841	0.743621	61.1854	82.05	0	3
4.8913	1.07764	0.963352	33.8323	173.949	0	3
4.75443	0.967089	0.864525	69.038	110.119	0	3
5.19128	1.17722	1.05237	36.7257	158.431	0	3
5.59574	0.858801	0.767721	38.0232	177.901	0	3
4.9578	1.09908	0.98252	43.8936	120.568	0	3
4.8739	1	0.893946	34.654	165.04	0	3
5.10327	1.43836	1.28581	70.5743	64.6832	0	3
5.0516	0.719902	0.643553	67.2899	106.954	0	3
4.68317	0.885149	0.791275	36.0059	174.657	0	3
4.98649	1.02027	0.912066	43.1171	127.638	0	3
5.372	1.0392	0.928989	34.7328	185.806	0	3
5.40472	1.03733	0.927315	39.5265	152.769	0	3
5.25	1.28179	1.14585	36.3815	189.756	0	3
5.47887	1.13302	1.01286	41.2019	150.54	0	3
5.31894	1.299	1.16124	43.8455	140.686	0	3
4.86964	1.19726	1.07028	38.0292	180.039	0	3
5.47919	1.08859	0.973141	39.243	189.86	0	3
4.60257	0.954968	0.85369	92.351	12.58	0	3
5.42748	1.37786	1.23173	36.3282	181.531	0	3
5.16567	1.34179	1.19949	31.6881	194.195	0	3
5.20315	1.37482	1.22902	35.4549	162.27	0	3
5.37947	0.866348	0.774469	84.4654	98.1111	0	3
5.65905	1.26889	1.13432	38.2179	189.454	0	3
4.75355	0.838652	0.74971	49.6596	200.6	0	3
5.32129	1.12305	1.00394	45.3096	163.743	0	3
4.9258	1.0636	0.950805	32.0848	181.172	0	3
5.07178	1.01631	0.908529	97.3703	30.6	0	3
5.3511	1.1011	0.984326	49.6324	116.068	0	3
5.13817	0.927461	0.8291	63.3143	140.865	0	3
4.75316	0.898734	0.80342	48.4388	194.63	0	3
5.2377	1.27869	1.14308	40.6754	130.607	0	3
4.76585	0.967658	0.865034	80.9599	32.9958	0	3
5.15916	1.03698	0.927002	28.1431	196.081	0	3
5.20359	1.37964	1.23332	39.0778	141.436	0	3
5.17862	1.10039	0.98369	41.0913	154.211	0	3
5.44485	1.17463	1.05006	36.761	175.101	0	3
5.22439	0.987805	0.883044	31.6122	163.924	0	3
5.0835	1.08544	0.970322	46.365	115.029	0	3
5.11751	1.17506	1.05044	31.5036	177.004	0	3
4.89774	0.876692	0.783715	42.7714	191.659	0	3
5.44619	1.03675	0.926794	49.811	122.842	0	3
5.31333	1.22667	1.09657	40.1022	141.509	0	3
5.10822	1.41096	1.26132	37.8575	165.655	0	3
5.20376	1.19436	1.06769	65.8417	154.539	0	3
4.91733	1.2655	1.13129	51.097	113.114	0	3
5.36434	0.888372	0.794157	74.7116	128.511	0	3
5.21094	1.04427	0.933522	36.0404	182.93	0	3
4.93456	1.11452	0.99632	35.9202	171.727	0	3
5.14056	1.16667	1.04294	73.6988	58.7167	0	3
5.17656	1.27702	1.14158	103.813	37.3087	0	3
5.36494	1.1961	1.06925	77.026	73.9834	0	3
5.29666	1.35794	1.21392	43.0961	138.38	0	3
4.93605	1.19048	1.06422	35.4136	161.789	0	3
4.83541	1.30567	1.1672	43.888	119.7	0	3
4.61821	0.998249	0.89238	33.0683	175.742	0	3
5.06782	1.35904	1.21491	55.4295	104.993	0	3
4.97504	1.0279	0.918887	42.6138	128.248	0	3
4.99118	1.51889	1.35781	40.6058	150.804	0	3
4.98	1.24438	1.1124	57.3306	89.4898	0	3
5.04545	1.08392	0.968962	37.1259	163.133	0	3
4.80144	0.991748	0.886569	38.3961	141.742	0	3
5.12734	1.04556	0.934675	82.4755	40.8708	0	3
5.38176	1.18702	1.06113	46.0433	172.628	0	3
5.08346	1.21669	1.08766	42.306	147.222	0	3
4.73006	0.949387	0.8487	58.2945	129.274	0	3
5.06317	1.20296	1.07538	65.7715	82.9468	0	3
5.31669	1.29364	1.15644	61.2936	94.8064	0	3
4.84123	0.946223	0.845872	56.8361	104.707	0	3
4.69444	1.03216	0.922699	37.5117	175.357	0	3
5.00634	1.11205	0.994113	56.7378	121.338	0	3
5.32613	1.38018	1.23381	41.5081	163.665	0	3
4.81361	1.10068	0.983949	44.7401	146.636	0	3
4.93561	1.09356	0.977585	82.0433	55.9142	0	3
4.74095	1.33824	1.19631	66.9502	95.7388	0	3
5.43891	1.15837	1.03552	78.3869	63.3386	0	3
5.04406	1.1954	1.06862	47.7797	153.056	0	3
4.24486	0.808642	0.722882	106.158	24.4067	0	3
5.42888	1.21663	1.0876	62.3764	115.953	0	3
5.20277	0.996222	0.890568	87.0869	38.7212	0	3
4.95203	1.26568	1.13145	61.4502	127.238	0	3
5.19793	1.21123	1.08277	56.9188	164.062	0	3
4.74079	1.10057	0.983847	46.3343	140.741	0	3
5.17515	1.21589	1.08694	70.5193	92.618	0	3
5.02097	1.22581	1.0958	61.721	102.91	0	3
4.20641	0.603206	0.539234	88.2465	25.6469	0	3
4.84506	1.1328	1.01267	86.5902	54.2724	0	3
5.07953	0.950931	0.850081	82.3029	67.619	0	3
4.71985	1.09833	0.981848	75.0482	44.7898	0	3
5.16804	1.33884	1.19685	75.5427	114.792	0	3
4.61799	1.54498	1.38113	55.5893	152.249	0	3
4.41164	0.915753	0.818634	83.1897	13.94	0	3
5.32783	1.34323	1.20078	94.6711	82.9962	0	3
4.90054	1.15009	1.02812	48.0597	166.892	0	3
4.91061	1.10428	0.987169	57.7486	140.403	0	3
5.23128	1.46524	1.30985	71.893	102.952	0	3
4.77982	1.12477	1.00548	69.8826	56.5638	0	3
4.67742	1.1996	1.07237	34.5363	165.921	0	3
4.9554	0.899061	0.803712	64.4531	89.4258	0	3
4.86049	0.876905	0.783906	46.9543	128.184	0	3
4.66758	0.81044	0.724489	29.9808	179.613	0	3
4.84249	0.778388	0.695837	59.6777	92.6823	0	3
4.75624	1.10304	0.986059	80.4054	24.715	0	3
4.47368	0.590643	0.528003	93.5171	39.8091	0	3
4.42429	0.881095	0.787651	95.3755	3.07883	0	3
4.85697	0.940898	0.841112	56.1572	102.611	0	3
4.35588	0.594203	0.531185	58.7134	81.892	0	3
4.84981	0.865134	0.773383	70.0238	72.7767	0	3
3.81709	0.8006	0.715693	86.5667	2.06814	0	3
4.88877	0.947137	0.846689	80.3656	41.9745	0	3
5.07292	0.975694	0.872218	37.7361	141.14	0	3
4.6777	0.713024	0.637405	35.0199	160.67	0	3
4.79046	1.10983	0.992125	34.4133	180.516	0	3
6.30918	0.545894	0.487999	65.1135	98.6375	0	3
6.53048	1.64415	1.46978	39.7545	179.662	0	3
5.06264	1.08884	0.973363	77.828	73.44	0	3
5.59884	1.3561	1.21228	36.7718	169.66	0	3
4.87305	1.27394	1.13884	42.5724	126.16	0	3
4.50781	0.701172	0.62681	77.5996	75.3205	0	3
4.55147	0.95098	0.850125	38.125	164.145	0	3
4.93342	1.33909	1.19707	28.8496	188.401	0	3
5.28611	1.42778	1.27636	70.4655	68.2799	0	3
5.49153	1.32712	1.18637	38.3576	154.681	0	3
4.51914	1.06419	0.951328	40.6543	120.478	0	3
4.95299	1.29915	1.16137	33.5812	186.951	0	3
4.77728	1.20713	1.07911	37.4254	144.985	0	3
5.01585	1.20874	1.08055	55.9093	104.842	0	3
4.8099	1.05859	0.946326	49.7383	108.869	0	3
5.11071	1.25595	1.12275	48.856	119.7	0	3
5.01626	1.27439	1.13924	48.2825	136.099	0	3
4.84447	1.20737	1.07933	62.3479	115.314	0	3
4.51444	0.783902	0.700766	80.7174	14.6792	0	3
4.85405	0.99422	0.888779	54.3338	105.222	0	3
4.625	0.849227	0.759163	39.0644	143.905	0	3
4.91692	1.19637	1.06949	53.2553	131.69	0	3
4.72246	1.40254	1.2538	64.9894	85.5132	0	3
5.04218	1.20267	1.07513	59.8117	118.785	0	3
4.47995	0.921087	0.823402	58.3997	97.0389	0	3
4.99853	1.26549	1.13128	56.4395	130.958	0	3
4.20604	0.835588	0.74697	62.719	49.0225	0	3
4.63761	0.83792	0.749056	65.5994	94.594	0	3
4.90493	0.764126	0.683087	74.4081	52.3997	0	3
4.08309	0.615727	0.550427	40.549	157.227	0	3
5.00658	0.863487	0.771911	36.2303	141.96	0	3
4.99683	0.88748	0.793359	42.4802	124.027	0	3
4.95681	0.818317	0.731531	34.108	158.856	0	3
4.50889	2.4237	2.16666	98.0711	37.6925	0	3
5.12269	1.13061	1.0107	31.4116	190.06	0	3
5.14547	1.08362	0.968701	73.6882	59.4757	0	3
5.11996	1.34837	1.20537	83.6113	21.2548	0	3
4.04775	0.515449	0.460784	101.83	30.2447	0	3
4.83624	0.989547	0.884602	71.4472	55.878	0	3
5.0562	1.03924	0.929021	73.6935	58.8946	0	3
4.48762	0.501548	0.448357	89.6223	12.6167	0	3
4.72276	0.813793	0.727487	44.989	109.799	0	3
4.54442	1.16497	1.04142	43.6244	119.883	0	3
4.85411	1.09284	0.976938	43.7135	126.426	0	3
4.88873	0.984701	0.880269	55.8414	95.8414	0	3
4.72328	0.865017	0.773278	78.2508	55.1691	0	3
4.4757	0.95729	0.855766	35.3299	153.979	0	3
4.44702	0.77649	0.69414	88.2881	31.998	0	3
4.19172	0.77454	0.692397	35.3497	163.854	0	3
4.62601	1.04826	0.937085	42.1233	129.649	0	3
5.20881	1.33716	1.19535	67.204	85.7029	0	3
4.42269	1.18828	1.06226	41.4763	170.939	0	3
5.25692	1.15283	1.03057	76.6364	73.2382	0	3
4.55596	0.912455	0.815685	71.6164	18.2241	0	3
4.6338	0.908451	0.812106	43.3146	145.415	0	3
4.98827	1.32831	1.18744	75.2052	66.3558	0	3
5.12262	1.33606	1.19436	77.802	77.9913	0	3
4.7168	0.86134	0.769991	55.8167	113.371	0	3
4.31586	0.846442	0.756673	75.6005	7.21249	0	3
4.3033	1.21978	1.09042	33.9868	174.107	0	3
4.53431	0.620915	0.555064	39.0507	117.659	0	3
4.68	1.00133	0.895138	57.424	65.0183	0	3
4.77149	0.81448	0.728101	33.9729	161.299	0	3
6.77228	1.21411	1.08535	106.04	63.6164	0	3
4.90923	1.05446	0.94263	73.2076	41.3768	0	3
4.61875	0.83125	0.743093	24.8417	198.919	0	3
4.68856	0.841849	0.752568	101.577	70.72	0	3
4.8412	0.672389	0.60108	64.8598	73.4156	0	3
4.48024	0.600304	0.536639	86.8435	91.0921	0	3
5.11074	0.80766	0.722005	79.1224	49.0932	0	3
5.19696	1.11661	0.998189	68.341	79.552	0	3
4.83077	1.15962	1.03663	80.2644	6.80849	0	3
4.46489	0.707022	0.632039	33.6344	172.152	0	3
4.81278	0.632159	0.565116	111.784	9.81299	0	3
4.58849	1.12715	1.00761	82.817	24.9385	0	3
4.90349	1.21448	1.08568	39.3928	135.51	0	3
4.99886	1.2446	1.1126	32.3845	155.335	0	3
5.06943	1.19092	1.06462	45.8772	117.225	0	3
4.5037	0.682963	0.610532	70.4415	80.4414	0	3
5.07143	1.02232	0.9139	79.7679	101.955	0	3
4.96465	0.843434	0.753985	77.0126	103.633	0	3
4.95411	1.01494	0.907303	73.4109	58.0992	0	3
4.79817	1.23058	1.10007	40.4942	149.362	0	3
4.79159	1.04936	0.938071	41.287	158.505	0	3
4.95369	1.02426	0.915629	68.4079	65.1985	0	3
4.44335	0.947455	0.846973	77.8588	34.8015	0	3
4.62707	1.0511	0.939631	52.8122	131.619	0	3
4.18895	1.27763	1.14214	40.3342	156.405	0	3
4.81609	1.26519	1.13101	60.1207	137.455	0	3
4.36104	0.603542	0.539534	50.1117	80.4479	0	3
4.40479	0.87513	0.782319	65.1519	19.1399	0	3
4.72698	0.895681	0.80069	67.7294	55.144	0	3
4.55112	3.04554	2.72255	138.477	35.9115	0	3
4.84237	0.817445	0.730752	54.2891	105.364	0	3
3.94514	1.90971	1.70718	103.61	13.5489	0	3
6.19336	0.810967	0.72496	65.4084	110.42	0	3
4.60339	0.804348	0.719043	89.8828	31.2818	0	3
4.84007	0.845118	0.75549	53.0724	106.029	0	3
4.98187	0.895397	0.800437	62.0586	83.4671	0	3
5.16414	1.0454	0.934533	60.1659	100.273	0	3
4.1704	0.736921	0.658767	74.0463	31.501	0	3
4.924	1.23716	1.10595	43.2555	138.664	0	3
4.68498	1.03554	0.925718	38	147.582	0	3
4.84356	1.08487	0.969812	73.2802	75.5213	0	3
4.6	1.16364	1.04023	30.3139	163.653	0	3
4.54121	0.674961	0.603379	90.1462	21.8581	0	3
4.6408	1.46772	1.31206	32.0501	176.63	0	3
4.51493	0.619403	0.553713	85.916	70.9428	0	3
4.78598	1.2403	1.10876	44.8786	117.939	0	3
4.78232	1.36939	1.22416	36.6755	170.897	0	3
4.74108	0.948548	0.84795	63.6979	90.3255	0	3
4.48283	1.07618	0.962047	50.0097	119.488	0	3
5.04111	1.27678	1.14137	64.5373	107.613	0	3
4.85897	1.9886	1.7777	47.1268	169.398	0	3
4.87761	1.09055	0.97489	68.1632	89.7915	0	3
4.31712	0.554955	0.4961	77.6505	58.9388	0	3
4.56503	0.738462	0.660145	67.5427	107.595	0	3
4.57338	0.813993	0.727666	57.0717	84.0674	0	3
4.51561	1.01248	0.905106	32.2772	147.424	0	3
4.53373	2.33373	2.08623	109.383	28.8179	0	3
4.42962	2.3493	2.10015	110.872	22.1496	0	3
4.40917	2.77509	2.48078	129.902	26.8794	0	3
4.74227	3.46574	3.09818	138.744	17.4827	0	3
4.639	0.946058	0.845725	77.0025	51.0702	0	3
5.19897	1.24289	1.11108	29.0698	191.23	0	3
4.56186	0.572165	0.511485	108.155	34.2861	0	3
5.05604	0.770578	0.688855	46.0298	108.385	0	3
4.94256	1.16513	1.04156	82.5692	61.4808	0	3
4.54751	0.753394	0.673493	52.5837	113.963	0	3
5.05661	1.21852	1.08929	44.7582	121.897	0	3
4.80913	1.34703	1.20417	68.7215	62.5914	0	3
4.32932	0.670675	0.599547	97.9584	3.9796	0	3
4.76737	1.02423	0.915609	76.2633	39.4224	0	3
4.51222	1.08639	0.971172	76.1702	27.3779	0	3
3.84275	0.675676	0.604018	88.5356	16.7431	0	3
4.716	1.44404	1.2909	37.509	135.064	0	3
4.85532	1.14693	1.02529	56.003	150.949	0	3
4.06173	0.654321	0.584928	95.9053	52.2694	0	3
4.4	1.2137	1.08498	35.1192	157.518	0	3
4.25217	0.645652	0.577178	62.7696	133.589	0	3
4.76739	1.51522	1.35452	43.1033	161.65	0	3
4.82353	1.21504	1.08618	58.4889	122.228	0	3
4.53309	0.791817	0.707842	109.11	87.5545	0	3
4.10277	1.11594	0.997592	67.4203	56.8461	0	3
4.75353	1.24213	1.1104	63.3887	106.882	0	3
4.25159	0.56871	0.508396	40.8584	112.591	0	3
4.3155	0.594096	0.53109	81.1494	55.8356	0	3
4.79496	3.04317	2.72043	146.772	11.4696	0	3
4.45081	2.01028	1.79708	106.171	2.06814	0	3
4.66667	0.74359	0.664729	53.8718	126.902	0	3
4.57271	2.36389	2.11319	111.271	7.67075	0	3
4.14689	0.781544	0.698658	35.6516	126.799	0	3
4.53207	2.31937	2.07339	108.942	18.3096	0	3
4.86737	0.84507	0.755447	73.0857	83.6953	0	3
4.56103	2.33235	2.085	115.503	8.66833	0	3
4.42616	2.12459	1.89927	101.821	16.1097	0	3
4.43014	1.34716	1.20429	79.8349	18.02	0	3
4.78243	0.97973	0.875825	64.077	85.68	0	3
5.21966	1.08295	0.968098	58.1367	91.3107	0	3
4.6533	0.761792	0.681001	34.4929	185.35	0	3
4.98943	0.579251	0.517819	104.424	38.6734	0	3
5.23392	0.902534	0.806817	42.7271	144.903	0	3
4.98842	0.762663	0.681779	91.1201	101.232	0	3
4.81892	1.08646	0.971237	46.0767	112.881	0	3
4.60282	1.04366	0.932977	41.7239	126.331	0	3
4.81797	0.650739	0.581726	103.932	80.7026	0	3
4.35447	1.24063	1.10906	75.3919	18.8232	0	3
4.63438	1.15547	1.03293	60.4859	128.037	0	3
4.42979	1.02564	0.916868	49.1294	156.416	0	3
4.333	1.36581	1.22096	65.329	41.0105	0	3
4.50646	0.641144	0.573148	60.8644	71.0893	0	3
4.37965	0.701313	0.626936	90.3589	42.1298	0	3
5.10662	0.549273	0.49102	61.0889	76.301	0	3
4.91386	0.810861	0.724866	60.5075	73.5422	0	3
4.93472	1.52791	1.36587	83.3775	29.6503	0	3
4.7	1.34375	1.20124	27.6167	186.331	0	3
4.86456	1.08578	0.970628	72.6546	73.44	0	3
4.32914	0.772537	0.690606	64.739	5.78	0	3
4.97565	1.10552	0.988275	37.638	142.257	0	3
4.73167	1.00147	0.895257	32.9384	160.426	0	3
4.49239	0.936437	0.837124	71.6329	50.7967	0	3
4.66138	0.784832	0.701598	98.9347	17.4827	0	3
4.11475	0.672131	0.600849	44.5137	169.021	0	3
5.01919	1.09932	0.982735	58.1761	102.793	0	3
4.62411	1.11575	0.997422	38.2315	151.643	0	3
4.7842	1.05784	0.945654	42.3393	131.894	0	3
4.63824	0.98062	0.876621	50.8243	114.894	0	3
4.60844	0.976447	0.872891	79.3415	31.0016	0	3
4.61336	1.2232	1.09347	37.7241	168.471	0	3
4.6966	0.905709	0.809655	84.4824	52.5946	0	3
4.89369	1.06914	0.955757	59.529	99.5416	0	3
4.84256	1.27747	1.14199	71.9743	59.5505	0	3
4.21672	0.948916	0.84828	75.9683	20.948	0	3
4.47373	0.91651	0.819311	75.485	30.9251	0	3
4.49138	1.09655	0.980258	78.4112	49.9754	0	3
4.51842	1.11234	0.994371	75.0424	69.4608	0	3
5.0109	2.875	2.57009	147.874	39.4224	0	3
5.32138	2.70254	2.41593	125.161	7.09941	0	3
4.96041	0.794381	0.710133	93.4815	78.6716	0	3
4.8801	2.38581	2.13278	107.183	30.3134	0	3
4.43391	0.775862	0.693579	69.727	49.9846	0	3
5.08872	0.841035	0.75184	45.9778	132.6	0	3
6.24425	1.24973	1.11719	115.671	41.14	0	3
5.87606	0.864789	0.773074	45.2873	167.7	0	3
4.85701	1.0785	0.964125	76.6467	46.6804	0	3
4.38714	1.45752	1.30295	77.7816	32.8131	0	3
5.2403	0.882625	0.789019	71.8142	75.6376	0	3
5.33456	1.18057	1.05536	63.7516	84.7712	0	3
4.83702	1.40193	1.25325	34.4351	160.521	0	3
4.74439	0.99701	0.891273	31.6921	151.786	0	3
4.55276	1.03477	0.92503	39.1391	122.503	0	3
4.77064	0.852192	0.761813	57.1397	88.2233	0	3
4.30625	0.55	0.49167	106.055	25.5	0	3
4.99016	1.38907	1.24175	70.4186	76.967	0	3
4.71882	0.951247	0.850364	41.8231	121.993	0	3
5.58071	1.3276	1.1868	63.7479	102.046	0	3
4.60576	1.08693	0.971659	82.6423	43.0607	0	3
4.66785	1.40426	1.25533	49.8251	126.427	0	3
4.18844	1.54711	1.38303	72.3897	10.6491	0	3
4.34494	0.694382	0.62074	108.685	46.5192	0	3
4.41507	1.20827	1.08013	38.5672	165.409	0	3
4.31731	1.21291	1.08428	69.7527	60.1982	0	3
4.82025	1.12913	1.00938	70.7345	98.6193	0	3
4.57399	1.0796	0.965101	51.6222	143.945	0	3
4.75754	1.6056	1.43532	47.0172	168.437	0	3
4.4374	0.774343	0.692221	108.473	97.6801	0	3
4.46935	0.935824	0.836576	50.9981	95.6005	0	3
4.56089	0.784889	0.701648	64.8053	65.5945	0	3
4.53814	1.00206	0.895789	29.2433	169.648	0	3
4.64783	1.20151	1.07408	27.3465	193.302	0	3
4.67404	0.765487	0.684304	40.6313	177.456	0	3
5.90957	1.63298	1.45979	45.3338	141.824	0	3
4.73309	0.979469	0.875592	69.6449	70.9289	0	3
5.04279	0.940315	0.840591	55.4955	104.749	0	3
6.17805	0.94824	0.847675	48.1139	140.562	0	3
5.22851	1.26087	1.12715	80.7543	61.431	0	3
5.28502	1.14332	1.02207	46.8371	119.956	0	3
5.08548	1.15604	1.03344	40.1506	143.406	0	3
4.51227	1.11255	0.994563	29.2222	182.05	0	3
4.49314	0.812745	0.72655	68.0196	65.4754	0	3
5.02033	1.18022	1.05505	38.4079	165.71	0	3
6.66241	1.9844	1.77394	54.8071	142.083	0	3
4.59318	1.09501	0.978876	55.0816	175.698	0	3
5.42537	1.40149	1.25286	46.6104	139.55	0	3
4.2117	0.54269	0.485136	100.199	68.1986	0	3
4.49689	1.25622	1.123	79.3444	35.2175	0	3
4.9802	1.51238	1.35198	43.3824	159.217	0	3
4.34892	1.10718	0.989762	57.7583	78.2916	0	3
5.5814	1.20685	1.07886	60.5031	92.8922	0	3
4.59806	1.44068	1.28789	58.7724	100.695	0	3
4.75457	1.28198	1.14602	39.2885	141.231	0	3
4.54634	1.13902	1.01823	49.9963	113.495	0	3
4.63526	0.873486	0.780849	43.1978	140.161	0	3
4.58389	1.21253	1.08393	63.2472	80.3185	0	3
4.06211	1.22862	1.09832	84.3222	9.67657	0	3
4.18288	1.00423	0.897726	56.907	118.056	0	3
4.03514	0.747604	0.668317	34.9105	146.684	0	3
4.46405	2.72437	2.43544	124.185	45.0099	0	3
4.13551	2.43084	2.17304	113.924	10.88	0	3
4.5983	0.81068	0.724704	73.5376	70.6169	0	3
5.02549	1	0.893946	53.7886	165.912	0	3
5.05364	1.52107	1.35976	72.2797	71.74	0	3
4.19893	0.851802	0.761465	68.7984	61.88	0	3
4.87935	0.668213	0.597347	55.9304	123.42	0	3
4.28625	1.11152	0.993642	77.8234	29.24	0	3
4.44329	0.880052	0.786719	78.6349	69.912	0	3
5.99332	1.31016	1.17121	60.762	135.841	0	3
4.62455	0.921781	0.824022	44.3369	118.42	0	3
3.96075	0.767918	0.686477	115.517	10.8853	0	3
4.62868	0.964637	0.862333	46.2927	125.759	0	3
6.07022	1.11053	0.992757	49.4928	149.913	0	3
5.28103	1.17546	1.0508	40.0328	162.761	0	3
3.93732	1.52991	1.36766	63.9516	17.552	0	3
5.64442	1.39563	1.24762	65.6675	103.164	0	3
4.56681	0.992693	0.887414	75.1816	55.4148	0	3
5.74427	1.39859	1.25026	55.2804	112.04	0	3
5.24807	1.34823	1.20524	41.9615	146.836	0	3
4.46523	0.944374	0.844219	33.4589	180.355	0	3
4.67585	0.877119	0.784097	55.822	131.188	0	3
4.59684	1.05534	0.943413	40.5771	156.501	0	3
4.58239	1.33836	1.19643	39.8252	165.684	0	3
4.72267	1.40506	1.25605	56.8677	111.214	0	3
4.79129	1.41485	1.2648	71.927	85.3752	0	3
3.8336	1.51823	1.35721	68.8748	13.5489	0	3
4.85638	1.51678	1.35592	65.1262	97.7025	0	3
4.57647	1.25882	1.12532	38.2314	166.634	0	3
4.68174	1.24696	1.11471	67.9704	77.5744	0	3
4.14845	0.818923	0.732073	39.0163	150.654	0	3
3.88506	0.922414	0.824588	70.8491	35.0464	0	3
4.56662	1.69448	1.51478	61.5047	139.146	0	3
4.62799	1.45215	1.29815	52.4115	153.557	0	3
4.57221	1.26696	1.13259	84.8632	65.9048	0	3
4.60829	0.658986	0.589098	41.8894	116.978	0	3
4.74905	1.04563	0.934734	32.5095	175.148	0	3
4.3224	0.63388	0.566654	66.1366	125.253	0	3
3.76117	1.01553	0.907832	58.9049	63.4125	0	3
4.33856	0.69906	0.624921	36.5611	139.745	0	3
3.82317	1.625	1.45266	95.529	31.8259	0	3
4.62753	0.890688	0.796227	32.1194	185.811	0	3
4.39245	0.790566	0.706723	48.7774	91.2113	0	3
4.33573	0.551559	0.493064	31.4412	170.782	0	3
5.53088	0.861436	0.770077	59.7963	96.5983	0	3
3.87441	2.23005	1.99354	108.83	5.44	0	3
5.59375	1.17813	1.05318	48.6875	129.797	0	3
5.82836	0.738806	0.660453	68.8209	94.52	0	3
4.80688	0.868069	0.776007	52.3231	109.923	0	3
3.63093	0.628866	0.562172	47.5567	89.8282	0	3
4.21589	0.663951	0.593536	59.1548	80.9928	0	3
5.04167	1.32292	1.18262	44.9983	184.103	0	3
4.16627	0.657831	0.588066	65.947	50.1474	0	3
5.2875	1.26429	1.1302	72.6464	122.374	0	3
4.02273	1.2438	1.11189	76.7335	11.6843	0	3
5.37086	1.3223	1.18206	54.3201	135.811	0	3
4.64431	1.54914	1.38485	43.3791	165.748	0	3
4.0419	0.48324	0.431991	79.5279	63.9959	0	3
4.7027	0.989189	0.884282	45.8216	109.426	0	3
4.04301	1.07348	0.95963	40.0341	172.519	0	3
5.04697	1.76321	1.57621	57.4834	152.324	0	3
3.7372	0.709898	0.63461	62.529	20.5384	0	3
4.38821	0.98374	0.87941	59.6829	114.883	0	3
4.25054	1.05353	0.941802	52.2077	88.7446	0	3
4.46515	0.902145	0.806469	47.3606	162.659	0	3
4.43289	1.19849	1.07138	82.6654	94.5787	0	3
3.69231	0.659341	0.589415	42.6346	107.797	0	3
3.67626	0.685851	0.613114	56.2422	55.2958	0	3
33.3846	1.23403	1.40052	59.7147	92.2923	1	4
41.9038	2.93916	3.33569	57.8197	113.296	1	4
53.247	4.07081	4.62002	61.7686	93.2648	1	4
58.8783	3.34667	3.79818	52.4567	111.159	1	4
10.445	0.847385	0.961709	51.5998	116.85	1	4
13.3373	0.831325	0.943483	48.1314	112.158	1	4
38.4312	3.31377	3.76084	71.6948	82.9279	1	4
58.6942	3.00218	3.40721	63.5071	66.0283	1	4
26.9952	3.2869	3.73035	56.2393	82.2168	1	4
23.5681	1.80977	2.05393	51.5894	102.905	1	4
44.1103	7.34207	8.33262	89.0979	54.9287	1	4
33.9273	7.7936	8.84507	68.3939	56.8776	1	4
31.1233	4.61233	5.2346	59.6377	70.0804	1	4
40.5193	7.67413	8.70948	67.0071	53.85	1	4
38.1187	9.13102	10.3629	61.5487	46.4309	1	4
29.2584	5.86885	6.66064	68.3452	64.4854	1	4
9.55705	0.827801	0.939483	50.2873	88.4843	1	4
37.5138	2.91531	3.30863	53.3567	79.9	1	4
9.90578	0.494647	0.561381	60.2227	61.2849	1	4
7.71056	0.719255	0.816292	65.7913	48.5057	1	4
26.1598	6.02398	6.83669	66.2368	73.6388	1	4
9.43715	0.721404	0.818732	63.513	53.354	1	4
25.117	4.64898	5.27619	48.781	74.4662	1	4
30.905	5.0824	5.76809	58.655	62.0125	1	4
30.6015	5.13319	5.82573	56.798	79.082	1	4
40.3577	2.76032	3.13272	65.2455	85.3786	1	4
36.3959	1.69014	1.91816	42.1299	96.6856	1	4
32.9129	8.24476	9.3571	55.2822	56.8817	1	4
6.60515	0.566105	0.64248	48.9654	89.1734	1	4
35.3991	4.15646	4.71723	52.6791	95.1818	1	4
33.7703	1.60405	1.82046	36.5162	101.378	1	4
30.8903	3.19538	3.62648	52.1059	91.7124	1	4
47.9286	2.12801	2.41511	60.9944	104.38	1	4
10.1677	0.986405	1.11948	49.7372	97.1383	1	4
46.125	21.2854	24.1571	78.583	23.12	1	4
7.69689	1.39767	1.58623	57.1788	109.15	1	4
9.05593	0.581891	0.660396	53.988	75.868	1	4
31.4665	2.12746	2.41449	45.4967	97.8001	1	4
28.9772	1.54386	1.75215	43.2456	157.504	1	4
23.6779	2.0354	2.31	47.7947	141.172	1	4
9.02706	0.875	0.99305	64.4356	85.4375	1	4
22.0792	0.742081	0.842199	50.3032	88.3431	1	4
25.4514	7.01284	7.95897	52.0257	61.148	1	4
9.49637	0.322034	0.365481	45.0969	68.0136	1	4
24.2679	0.918651	1.04259	57.7976	98.2888	1	4
29.6124	3.9292	4.45931	53.7628	74.12	1	4
4.98953	0.451134	0.511999	70.6824	127.84	0	4
5.2375	0.704167	0.799169	83.3875	114.97	0	4
5.23767	0.482933	0.548087	72.3502	66.0861	0	4
5.9866	0.487936	0.553765	70.9786	94.0861	0	4
5.4469	0.578339	0.656365	64.0494	163.356	0	4
5.24919	0.674757	0.765791	75.2654	87.4778	0	4
4.79291	0.460993	0.523187	65.6582	115.509	0	4
4.53799	0.444853	0.50487	81.815	184.467	0	4
5.58696	0.569876	0.64676	80.8929	77.8889	0	4
5.52851	0.769379	0.873179	92.1621	53.8017	0	4
6.30198	0.770627	0.874595	63.9356	162.24	0	4
5.84653	0.697929	0.79209	75.6285	117.024	0	4
5.787	0.65704	0.745684	66.7401	144.846	0	4
4.80241	0.524055	0.594757	59.7904	150.902	0	4
5.10321	0.601116	0.682215	58.1381	174.405	0	4
5.08943	0.617886	0.701248	69.8354	139.4	0	4
5.31311	0.627427	0.712076	85.8058	44.4374	0	4
4.91536	0.587774	0.667073	54.9279	161.766	0	4
4.31924	0.458287	0.520116	74.3815	183.407	0	4
4.87794	0.622059	0.705983	63.0235	110.866	0	4
4.63412	0.536465	0.608841	115.074	66.4219	0	4
5.26214	0.642934	0.729675	75.5577	83.2084	0	4
5.7168	0.726562	0.824586	75.2617	175.946	0	4
5.86807	0.640535	0.726953	69.4952	133.339	0	4
5.33888	0.699584	0.793968	61.9418	128.172	0	4
4.9223	0.676259	0.767496	67.2417	80.1203	0	4
5.41855	0.696833	0.790845	64.0136	121.916	0	4
4.51402	0.564252	0.640378	84.1075	116.976	0	4
5.15021	0.755365	0.857274	58.6545	149.804	0	4
5.49526	0.732989	0.831879	57.3109	139.361	0	4
4.82168	0.768065	0.871688	53.2016	169.137	0	4
5.77894	0.795016	0.902275	98.918	38.6779	0	4
4.86197	0.646109	0.733278	49.42	190.03	0	4
5.15942	0.742029	0.842139	58.8058	126.052	0	4
5.18414	0.673913	0.764833	61.6253	139.921	0	4
5.18161	0.650224	0.737949	63.9013	120.739	0	4
5.11938	0.706977	0.802358	66.4589	85.8047	0	4
4.91194	0.904704	1.02676	57.2786	134.482	0	4
4.71913	0.595642	0.676002	88.5763	104.621	0	4
4.8831	0.546296	0.619999	83.4595	62.8375	0	4
4.43682	0.624025	0.708215	90.2964	31.9129	0	4
5.97855	1.37306	1.55831	76.8832	155.417	0	4
5.11407	1.00317	1.13851	46.9373	197.219	0	4
4.625	0.843333	0.957111	53.0933	176.882	0	4
4.8932	0.868217	0.985352	60.0301	109.026	0	4
4.82267	0.850291	0.965007	50.5523	148.376	0	4
5.08034	0.915352	1.03885	64.6686	131.078	0	4
5.35654	0.825127	0.936449	88.6791	77.9609	0	4
4.18216	0.472362	0.53609	74.956	140.82	0	4
4.7967	0.605769	0.687496	89.4849	29.9393	0	4
4.5195	0.83522	0.947903	55.5006	119.559	0	4
4.40602	0.593985	0.674122	88.3008	102.824	0	4
5.03171	0.985366	1.11831	56.1329	170.012	0	4
4.54584	0.778561	0.8836	73.1876	68.8892	0	4
4.95512	1.1473	1.30208	59.0242	133.506	0	4
5.04817	0.913991	1.0373	56.4989	162.976	0	4
5.01915	0.78933	0.895821	57.7196	152.684	0	4
5.29493	0.972516	1.10372	90.8932	78.5039	0	4
5.30602	1.10602	1.25524	51.441	171.372	0	4
4.65904	0.602911	0.684252	57.5468	126.909	0	4
4.58868	0.855346	0.970744	48.4692	197.526	0	4
4.21739	0.636364	0.722218	66.2174	184.34	0	4
4.56485	0.648536	0.736032	118.265	63.0019	0	4
4.90573	0.696897	0.790919	44.5024	190.027	0	4
5.05811	0.87046	0.987897	125.133	37.1721	0	4
4.7451	0.819608	0.930184	53.3477	127.569	0	4
5.03743	0.865241	0.981974	56.8513	202.568	0	4
5.01263	0.852407	0.967409	56.2265	141.258	0	4
4.70636	0.85671	0.972293	59.4006	120.757	0	4
4.57078	0.829819	0.941773	92.5648	49.43	0	4
4.5604	0.572148	0.649338	44.7752	177.872	0	4
4.83739	1.04481	1.18577	50.5723	199.184	0	4
5.02196	1.02326	1.16131	51.124	142.762	0	4
4.82796	0.780914	0.88627	69.9409	76.6329	0	4
4.94843	0.764574	0.867726	55.2287	130.406	0	4
4.73409	0.654545	0.742853	56.0136	186.53	0	4
5.15052	1.00745	1.14337	71.7288	86.7133	0	4
4.70188	1.07042	1.21484	55.2582	206.321	0	4
4.52462	0.724958	0.822764	46.635	192.137	0	4
4.83807	1.23011	1.39607	54.1222	178.436	0	4
5.01069	1.44885	1.64433	58.1527	117.244	0	4
4.68648	0.764331	0.86745	55.8577	168.806	0	4
4.97232	0.856089	0.971587	51.7232	134.132	0	4
4.73461	1.23529	1.40195	52.2572	213.495	0	4
4.29037	0.699259	0.793599	100.096	98.5443	0	4
4.81417	0.921123	1.0454	78.3008	71.06	0	4
4.54397	0.941368	1.06837	42.93	199.645	0	4
4.92095	1.00791	1.14389	45.834	218.008	0	4
5.01005	0.819095	0.929603	58.3799	125.949	0	4
4.8933	0.69353	0.787097	86.168	52.02	0	4
4.42879	1.08846	1.2353	43.3103	210.985	0	4
4.81798	0.813483	0.923233	94.1079	75.14	0	4
4.77797	1.01561	1.15263	56.15	157.083	0	4
4.12404	0.640123	0.726484	75.0459	168.303	0	4
4.82411	0.943262	1.07052	43.7631	187.355	0	4
5.0301	1.16388	1.3209	47.4933	119.775	0	4
4.77597	1.26197	1.43223	58.3487	130.794	0	4
4.76768	0.751515	0.852905	70.1737	87.571	0	4
7.72752	1.07192	1.21654	159.264	33.9064	0	4
4.36102	1.35144	1.53377	78.0735	107.494	0	4
4.35695	0.749319	0.850412	43.8583	190.051	0	4
4.68516	0.867969	0.98507	41.8547	154.369	0	4
4.48965	0.989038	1.12247	43.7259	218.459	0	4
5.20379	1.37204	1.55715	83.8128	69.36	0	4
4.79951	1.91759	2.1763	45.3579	196.336	0	4
4.6372	1.27573	1.44784	76.2335	59.16	0	4
5.08713	1.15667	1.31273	63.0512	124.305	0	4
4.50137	1.35109	1.53337	42.6134	183.943	0	4
4.16535	0.820866	0.931612	49.3799	138.78	0	4
4.94505	0.731868	0.830607	70.8527	93.5618	0	4
5.1146	0.723764	0.821409	79.4922	23.16	0	4
4.61394	1.23729	1.40422	38.8701	211.556	0	4
4.76786	1.3869	1.57402	67.9613	121.91	0	4
4.34727	0.614148	0.697005	90.1768	78.389	0	4
5.2893	1.24967	1.41827	107.925	59.2225	0	4
4.37669	1.75881	1.9961	38.9377	202.688	0	4
4.87179	1.04872	1.1902	70.4577	91.0603	0	4
5.05483	1.48341	1.68354	54.7576	145.978	0	4
4.74141	1.4303	1.62327	45.7737	163.479	0	4
4.39519	0.85087	0.965664	54.1533	182.504	0	4
4.48059	1.02957	1.16848	47.3494	173.373	0	4
5.35754	2.73184	3.10041	69.426	102.326	0	4
4.78884	1.17928	1.33838	67.2709	121.559	0	4
4.99176	0.75429	0.856054	72.4846	81.6354	0	4
4.40309	0.955641	1.08457	35.3886	189.633	0	4
4.29691	0.68171	0.773682	111.399	73.3021	0	4
4.64988	0.609113	0.691291	113.976	63.6808	0	4
4.91176	1.37724	1.56305	78.9425	85.4923	0	4
4.39315	1.81233	2.05684	42.7274	175.608	0	4
4.37584	0.700224	0.794694	53.1946	165.436	0	4
4.65337	0.861963	0.978254	47.9877	130.493	0	4
5.50517	1.10677	1.25609	106.958	54.3362	0	4
4.6899	1.36131	1.54497	38.6024	203.647	0	4
4.58797	0.77951	0.884677	104.878	72.4144	0	4
4.31522	1.16087	1.31749	45.9587	170.457	0	4
4.66906	1.48201	1.68196	44.4436	180.737	0	4
4.23174	0.690176	0.783291	62.1234	151.986	0	4
5.52977	0.801553	0.909694	106.279	28.7235	0	4
4.33527	0.608527	0.690626	106.5	108.543	0	4
4.52967	1.16264	1.31949	88.0374	80.7319	0	4
4.81158	2.27463	2.58151	81.2254	89.4723	0	4
5.3225	1.22503	1.3903	96.4152	21.4092	0	4
4.71709	1.2591	1.42897	43.7857	159.235	0	4
5.45021	1.3697	1.5545	100.319	54.5114	0	4
5.22642	1.32547	1.5043	96.2087	66.5046	0	4
4.57895	1.38496	1.57181	55.3353	119.79	0	4
6.26409	1.4273	1.61986	101.789	27.7928	0	4
4.60465	1.3588	1.54213	42.5723	190.489	0	4
4.84615	1.26642	1.43727	47.2439	152.769	0	4
5.41802	1.77024	2.00907	111.905	80.6667	0	4
4.25143	1.36286	1.54673	38.2886	197.336	0	4
5.00274	1.6238	1.84288	78.3858	92.7521	0	4
4.90673	2.1103	2.39501	54.6699	127.887	0	4
5.19778	1.58444	1.79821	92.6122	53.2238	0	4
5.63193	1.22559	1.39094	108.234	29.7689	0	4
4.53935	1.47917	1.67873	66.5093	110.42	0	4
5.0493	1.05282	1.19486	95.581	45.8206	0	4
4.67641	1.50104	1.70356	43.4154	168.099	0	4
4.11392	1.28129	1.45416	70.315	93.4332	0	4
4.59569	1.80948	2.05361	37.1784	193.904	0	4
5.00814	1.50153	1.7041	86.9776	67.6737	0	4
4.91865	1.60826	1.82524	84.9224	81.3908	0	4
4.86307	1.58921	1.80362	92.7106	56.0216	0	4
4.68897	1.08137	1.22727	102.349	40.0248	0	4
5.0298	0.817881	0.928224	105.517	30.0991	0	4
4.64409	1.30544	1.48157	62.2284	114.709	0	4
5.14089	0.912944	1.03611	101.039	19.2483	0	4
4.5264	2.0544	2.33157	40.4832	158.588	0	4
4.8427	1.09952	1.24786	98.7544	31.0742	0	4
4.63333	1.3869	1.57402	74.0286	70.8971	0	4
4.21773	1.20062	1.3626	40.9969	138.047	0	4
4.58182	1.13147	1.28412	60.021	91.7534	0	4
4.54261	1.46449	1.66207	54.4531	111.65	0	4
3.79877	0.711214	0.807166	55.8986	166.71	0	4
4.94406	1.30987	1.48659	78.159	67.9132	0	4
4.886	2.12266	2.40903	50.5108	133.305	0	4
4.13976	1.32289	1.50137	34.8892	198.361	0	4
4.70952	1.48158	1.68147	65.1244	115.441	0	4
4.87893	1.67554	1.9016	67.3196	106.916	0	4
5.07018	1.68797	1.9157	87.4524	89.9048	0	4
4.89565	1.20109	1.36313	80.0109	77.2878	0	4
4.90757	1.50704	1.71036	54.6276	138.73	0	4
4.64194	0.396774	0.450305	75.9129	98.6023	0	4
6.07843	0.582633	0.661238	80.7745	106.089	0	4
4.25438	0.438723	0.497913	98.5839	86.4269	0	4
5.52323	0.594949	0.675216	64.7131	131.041	0	4
5.4995	0.619143	0.702674	61.9352	145.139	0	4
5.76638	0.556769	0.631884	83.2445	96.3713	0	4
5.04871	0.585997	0.665056	76.3181	82.6864	0	4
5.36994	0.684971	0.777383	82.7616	31.5523	0	4
5.60062	0.770898	0.874903	56.2817	177.973	0	4
5.02163	0.618321	0.701741	57.9427	125.486	0	4
5.18928	0.609409	0.691627	68.9573	105.889	0	4
5.47885	0.593909	0.674035	57.5042	155.55	0	4
4.81755	0.534642	0.606773	72.0808	56.3877	0	4
4.53491	0.436759	0.495684	49.8366	128.147	0	4
4.16243	0.422099	0.479047	66.011	7.9082	0	4
4.85504	0.554054	0.628804	72.8931	20.3347	0	4
4.76618	0.497059	0.564119	51.0397	141.93	0	4
5.38703	0.623664	0.707805	59.8717	152.533	0	4
5.063	0.623	0.707051	60.952	106.827	0	4
4.7269	0.663448	0.752957	55.1448	169.545	0	4
4.2575	0.4775	0.541921	64.6975	181.499	0	4
4.16578	0.411765	0.467318	78.4626	96.8594	0	4
4.45734	0.544369	0.617812	48.5034	190.408	0	4
4.66958	0.48951	0.555552	76.2762	94.9453	0	4
5.01667	0.605128	0.686768	57.4667	162.283	0	4
5.47571	0.778894	0.883978	85.3283	77.3438	0	4
4.54027	0.669145	0.759422	50.6481	178.306	0	4
4.648	0.594667	0.674896	65.528	108.385	0	4
4.96296	0.632184	0.717474	78.5824	20.948	0	4
4.85308	0.921801	1.04616	66.2536	183.013	0	4
5.19452	0.932115	1.05787	52.0757	165.898	0	4
4.55378	0.677291	0.768667	57.3904	113.282	0	4
5.66953	0.616595	0.699782	97.1316	24.9894	0	4
4.58597	0.736425	0.835779	42.448	176.238	0	4
4.72348	0.688915	0.78186	62.348	91.6992	0	4
5.25575	0.961637	1.09138	52.9591	185.996	0	4
4.80451	0.628571	0.713374	42.5549	197.955	0	4
4.96024	0.680915	0.772779	82.0825	35.8744	0	4
5.04049	0.825911	0.937338	50.8124	178.135	0	4
5.09465	0.730453	0.829001	56.5309	145.879	0	4
4.88806	0.725124	0.822954	57.3234	135.568	0	4
4.55108	0.808065	0.917084	46.393	159.174	0	4
5.06769	1.13333	1.28624	62.9662	102.254	0	4
4.94385	0.618877	0.702372	115.137	49.145	0	4
4.89672	1.04435	1.18525	45.7491	171.112	0	4
4.86795	0.988996	1.12243	56.5667	152.148	0	4
5.19586	0.830508	0.942556	53.5537	162.122	0	4
4.73261	1.04637	1.18754	47.8825	187.009	0	4
5.33444	1.01656	1.1537	72.452	101.488	0	4
4.87177	0.943757	1.07108	46.2958	155.524	0	4
4.09266	0.583012	0.661668	41.8906	210.576	0	4
4.50028	0.963944	1.09399	39.5831	166.987	0	4
4.51419	1.03746	1.17742	55.7946	96.1455	0	4
4.2184	0.655215	0.743612	49.5755	108.088	0	4
4.87938	1.32539	1.5042	48.1052	202.28	0	4
5.41376	1.20529	1.3679	50.146	155.884	0	4
4.13127	0.706564	0.801889	35.6113	190.352	0	4
5.08806	0.843185	0.956942	46.2762	178.969	0	4
5.02467	0.841727	0.955287	82.6341	40.156	0	4
3.76364	0.492208	0.558614	37.5883	148.939	0	4
5.11228	1.18413	1.34389	71.0734	105.427	0	4
5.73508	1.0911	1.2383	90.6105	26.86	0	4
4.839	1.31315	1.49031	43.8922	205.473	0	4
5.12055	1.68379	1.91096	60.917	140.479	0	4
4.99892	1.11231	1.26238	82.7646	50.4588	0	4
4.94652	1.20053	1.3625	82.4412	18.7124	0	4
4.13889	0.746732	0.847477	39.9673	146.358	0	4
4.55605	0.90583	1.02804	62.0688	101.696	0	4
3.91536	1	1.13491	37.2565	191.688	0	4
4.5101	0.938384	1.06498	80.6152	70.9037	0	4
5.16282	0.885504	1.00497	71.1702	6.46	0	4
5.07483	1.28278	1.45585	52.8967	130.985	0	4
5.19779	1.03112	1.17024	94.1114	42.1614	0	4
4.57995	1.86158	2.11273	41.3532	212.302	0	4
5.40444	0.748459	0.849436	80.762	16.32	0	4
4.84232	1.22237	1.38729	66.5714	112.388	0	4
5.40536	1.27453	1.44648	87.0413	49.9372	0	4
4.28364	0.671515	0.762112	56.4497	159.03	0	4
5.41167	0.683955	0.77623	111.431	25.5362	0	4
5.51415	1.52044	1.72557	72.7453	95.6192	0	4
4.83408	1.50673	1.71	64.4006	122.688	0	4
4.75507	1.33073	1.51027	58.0515	112.478	0	4
4.95524	0.985808	1.11881	80.1736	37.8928	0	4
4.56466	1.45833	1.65508	46.273	148.597	0	4
5.50061	1.07394	1.21883	105.862	14.9947	0	4
4.99838	0.944939	1.07242	92.5457	7.82	0	4
5.05993	1.48414	1.68437	75.9083	64.8126	0	4
4.27711	1.66265	1.88697	38.375	197.038	0	4
4.34944	0.962963	1.09288	49.2174	121.707	0	4
5.1817	1.62887	1.84862	52.8028	142.898	0	4
5.4685	1.23476	1.40134	96.8841	45.9503	0	4
5.52159	0.834039	0.946562	85.3116	12.9468	0	4
4.60056	1.38064	1.56691	47.8158	134.827	0	4
4.82375	1.88123	2.13503	60.3008	107.603	0	4
5.1957	1.40095	1.58996	110.167	35.8744	0	4
4.62741	0.75803	0.860299	83.9764	101.347	0	4
4.75114	1.04575	1.18683	76.021	16.2526	0	4
5.16753	1.15893	1.31529	83.4837	40.9654	0	4
4.68217	1.56977	1.78155	56.312	123.529	0	4
4.82915	1.51613	1.72068	75.73	81.3844	0	4
5.16231	1.05664	1.1992	72.2593	25.4819	0	4
5.48633	1.54897	1.75795	113.673	43.8705	0	4
5.07382	1.44011	1.6344	77.3649	58.8554	0	4
4.27273	0.428195	0.485964	77.6825	182.251	0	4
4.9819	0.458999	0.520924	51.8232	171.436	0	4
5.26771	0.532578	0.60443	62.2847	102.412	0	4
4.70951	0.45768	0.519428	55.9436	155.327	0	4
5.56954	0.564238	0.640362	52.9881	167.803	0	4
4.94522	0.711063	0.806996	58.3383	136.498	0	4
4.71836	0.442417	0.502106	73.3922	29.66	0	4
4.19324	0.703273	0.798155	44.6399	160.328	0	4
4.59809	0.572967	0.650268	48.0443	155.014	0	4
4.74229	0.758323	0.860631	45.4316	148.608	0	4
4.75678	0.710553	0.806416	58.0683	97.0496	0	4
4.80986	0.66831	0.758474	38.4817	189.541	0	4
4.71692	0.774453	0.878938	44.9148	152.915	0	4
5.43257	0.570823	0.647835	82.6667	17.6538	0	4
4.69516	0.824194	0.935389	46.229	137.408	0	4
4.25359	0.639952	0.726291	69.1974	9.61665	0	4
4.22721	0.518614	0.588582	74.4082	20.011	0	4
5.25882	0.894118	1.01475	105.663	40.5342	0	4
4.0677	0.54352	0.616849	54.6731	132.517	0	4
4.42884	0.59176	0.671597	54.7116	129.625	0	4
4.65058	0.517544	0.587368	80.6988	38.4741	0	4
4.49686	1.04874	1.19023	42.4513	183.561	0	4
3.80178	0.449889	0.510585	94.657	69.2082	0	4
4.45755	0.981132	1.1135	48.2724	127.716	0	4
4.65163	0.651629	0.739543	82.8772	35.0349	0	4
4.60153	0.723664	0.821297	79.5359	44.5867	0	4
4.47232	0.630269	0.715301	76.0274	69.912	0	4
4.39557	0.731013	0.829636	46.0222	120.345	0	4
4.76519	1.13536	1.28853	38.5539	193.106	0	4
4.06195	0.464602	0.527283	86.2389	65.9679	0	4
4.33661	0.572835	0.650118	80.3898	81.0806	0	4
4.54192	0.570552	0.647528	113.902	96.3934	0	4
5.45274	0.979206	1.11131	89.7353	12.92	0	4
4.75198	0.643799	0.730657	40.9604	166.319	0	4
4.94833	0.796353	0.903792	39.6596	163.54	0	4
4.03051	0.979661	1.11183	34.4949	206.466	0	4
4.44651	0.586047	0.665112	91.4961	35.7582	0	4
4.47846	0.84723	0.961533	102.098	46.9397	0	4
4.84668	0.978516	1.11053	51.9609	120.911	0	4
5.05473	1.01254	1.14915	76.683	69.0501	0	4
4.96293	1.27062	1.44205	68.975	78.7487	0	4
4.25791	1.28954	1.46351	46.8759	138.288	0	4
4.79577	1.10856	1.25812	62.3054	105.086	0	4
5.00428	1.13345	1.28637	91.4696	36.407	0	4
4.79141	1.08896	1.23587	105.006	74.1208	0	4
5.04082	1.0167	1.15386	86.7254	67.9524	0	4
4.56174	0.756659	0.858742	58.7119	86.9822	0	4
4.35304	0.844595	0.958542	55.4054	164.901	0	4
4.27845	1.36199	1.54574	45.339	107.613	0	4
4.75098	1.21161	1.37508	83.7175	48.3828	0	4
5.68491	0.545283	0.618849	71.0792	96.5696	0	4
4.77566	0.529326	0.600739	55.2185	139.13	0	4
4.72026	0.444934	0.504962	77.3502	113.592	0	4
4.74904	0.494772	0.561523	72.9367	91.3335	0	4
5.02889	0.513644	0.582941	49.1284	184.768	0	4
5.04048	0.652174	0.740161	57.5487	112.824	0	4
4.49605	0.468009	0.53115	46.4493	152.428	0	4
4.72159	0.541193	0.614208	68.2983	78.9159	0	4
4.19519	0.362093	0.410945	51.628	89.6215	0	4
4.73711	0.473196	0.537037	51.899	134.738	0	4
4.87445	0.464758	0.52746	79.6002	40.3513	0	4
4.77655	0.59588	0.676272	47.1537	181.674	0	4
4.76991	0.455752	0.51724	54.8083	111.009	0	4
4.53785	0.567823	0.644431	43.2161	170.357	0	4
4.99262	0.573801	0.651214	53.7196	120.481	0	4
4.26408	0.478873	0.54348	49.9423	193.234	0	4
4.92902	0.582019	0.660541	43.9211	184.572	0	4
4.64957	0.540171	0.613048	40.9162	177.483	0	4
4.4988	0.628297	0.713063	50.4844	125.821	0	4
5.06393	0.525935	0.596891	79.2654	28.5438	0	4
4.1968	0.452645	0.513713	66.5904	165.908	0	4
4.43194	0.8375	0.95049	46.2722	184.769	0	4
4.58741	0.93007	1.05555	36.0653	209.46	0	4
4.49772	0.946347	1.07402	36.2888	198.384	0	4
4.74484	0.650442	0.738196	40.2493	180.888	0	4
4.79548	0.786868	0.893027	58.2626	86.8392	0	4
4.47242	0.738609	0.838258	62.7806	94.318	0	4
4.57588	1.06233	1.20565	38.2778	204.027	0	4
4.25822	0.780908	0.886263	66.5117	137.715	0	4
4.28434	0.755495	0.857421	57.5659	170.697	0	4
4.38667	0.658462	0.747297	99.1395	53.3182	0	4
4.40417	1.88194	2.13585	37.6042	209.2	0	4
4.24945	0.708972	0.804622	56.326	122.832	0	4
4.61461	0.544413	0.617861	70.9943	70.7862	0	4
4.49797	0.535859	0.608154	86.1719	101.68	0	4
4.97906	1.21466	1.37853	69.8874	90.5837	0	4
4.92589	0.997113	1.13164	88.3773	57.6859	0	4
5.29007	0.740397	0.840287	81.0344	28.5924	0	4
5.24043	1.12979	1.28221	85.3	49.0037	0	4
5.26254	0.874066	0.99199	87.9328	52.1255	0	4
4.7802	0.974832	1.10635	57.0252	96.4414	0	4
5.13172	0.84103	0.954496	85.0961	26.2241	0	4
4.69929	0.700709	0.795245	56.5901	87.7075	0	4
4.96197	1.13836	1.29194	92.0852	50.32	0	4
4.47575	0.598152	0.678852	81.4411	96.0131	0	4
4.80924	0.845652	0.959742	75.7065	14.5248	0	4
5.15857	0.861429	0.977647	82.7971	27.9752	0	4
4.40969	1.07048	1.21491	49.2555	125.901	0	4
5.27749	0.918848	1.04281	83.3063	17.4231	0	4
5.03295	1.13729	1.29072	79.0242	37.74	0	4
4.97751	1.36912	1.55383	76.2791	52.992	0	4
5.04964	0.490511	0.556688	57.8715	158.484	0	4
4.59535	0.421104	0.477916	55.0242	147.268	0	4
5.08718	0.468718	0.531955	47.8349	169.244	0	4
4.29825	0.427318	0.48497	73.4737	134.731	0	4
4.65816	0.398582	0.452356	51.7121	120.124	0	4
5.04031	0.735497	0.834725	73.3147	6.24157	0	4
4.74891	0.587808	0.667112	47.7039	169.783	0	4
4.39791	0.520942	0.591225	83.3037	115.188	0	4
4.81481	0.554361	0.629152	45.6344	162.338	0	4
4.2686	0.479339	0.544008	53.8843	144.073	0	4
4.15551	0.476378	0.540648	62.0945	121.075	0	4
4.49381	0.503937	0.571925	63.4173	64.5194	0	4
4.29412	0.651471	0.739363	37.2397	191.624	0	4
4.49688	0.702871	0.797699	73.6816	51.4255	0	4
4.46677	0.878877	0.99745	35.6632	188.381	0	4
4.56578	0.48877	0.554712	67.6107	40.1502	0	4
4.43452	0.997552	1.13214	36.8947	194.038	0	4
4.3753	0.720339	0.817523	37.6277	182.423	0	4
4.74702	0.937748	1.06426	60.0755	94.2414	0	4
4.51599	1.07093	1.21542	72.7163	65.1675	0	4
5	0.970317	1.10123	82.9171	59.3375	0	4
4.74276	1.13094	1.28352	63.4137	99.202	0	4
5.15823	0.8493	0.963883	82.7287	21.8898	0	4
4.83993	1.03957	1.17982	62.4559	84.3015	0	4
4.82865	0.835206	0.947887	74.4101	61.2699	0	4
4.20536	0.613095	0.69581	39.5476	167.162	0	4
4.11261	0.720721	0.817956	30.1059	171.606	0	4
5.09936	0.831086	0.943211	88.7317	4.73565	0	4
4.3501	1.36478	1.54891	44.0545	129.922	0	4
4.4735	0.745583	0.846173	104.147	10.5455	0	4
4.87418	1.33897	1.51961	68.8948	78.7039	0	4
4.02915	0.428571	0.486392	117.367	16.5591	0	4
3.96649	0.760309	0.862886	33.5077	181.546	0	4
4.37685	0.931751	1.05746	32.3412	181.361	0	4
4.46795	0.411172	0.466645	66.109	107.785	0	4
4.95878	0.57213	0.649318	79.1982	56.2482	0	4
4.19084	0.414122	0.469993	63.6698	124.325	0	4
4.73887	0.474696	0.53874	51.1285	144.945	0	4
4.8913	0.580745	0.659096	44.677	166.037	0	4
4.69122	0.753541	0.855204	42.0963	175.986	0	4
4.53098	0.622863	0.706896	70.3835	67.2212	0	4
4.83372	0.520642	0.590884	72.8716	25.8936	0	4
4.63297	0.661538	0.750789	43.3121	161.763	0	4
4.53288	0.732426	0.831241	43.7959	137.322	0	4
4.62571	0.788136	0.894466	49.8263	149.639	0	4
4.33863	0.648649	0.73616	51.3323	88.9768	0	4
4.67923	0.793279	0.900303	88.2882	30.7451	0	4
4.86524	0.641264	0.727779	74.0836	17.8135	0	4
4.19658	0.570513	0.647483	46.7244	210.454	0	4
4.15827	0.771169	0.875211	65.7782	72.5348	0	4
4.5542	0.715447	0.811971	80.2995	35.02	0	4
3.87191	0.58427	0.663096	38.964	188.848	0	4
4.36521	0.97344	1.10477	39.9296	157.438	0	4
4.19826	0.716776	0.813479	44.8497	127.225	0	4
4.38159	0.894549	1.01524	39.1278	214.949	0	4
5.01155	0.753108	0.854713	90.3703	34	0	4
4.94122	0.92034	1.04451	86.3534	21.2548	0	4
4.46549	0.704655	0.799723	86.0177	46.9988	0	4
4.9409	0.683287	0.775472	108.429	28.56	0	4
4.99411	1.1336	1.28653	75.8468	67.7292	0	4
4.83953	1.15878	1.31512	95.8953	11.2406	0	4
4.09256	0.622155	0.706092	37.4127	202.106	0	4
4.97366	1.05796	1.20069	84.0927	42.7292	0	4
4.77211	1.33673	1.51708	67.5476	87.6185	0	4
4.90304	1.11217	1.26221	74.8308	67.817	0	4
5.14245	1.05201	1.19394	73.6682	73.2769	0	4
4.3637	1.15944	1.31587	38.4379	180.264	0	4
4.97671	1.06366	1.20717	90.6118	63.7688	0	4
4.78846	1.333	1.51284	60.3128	93.2226	0	4
4.88758	0.85906	0.97496	85.2785	35.2175	0	4
5.17161	1.14619	1.30082	85.8633	28.9559	0	4
5.20793	1.58293	1.79649	94.4964	32.5726	0	4
4.20911	0.802277	0.910515	56.2912	105.427	0	4
4.1293	0.345336	0.391926	48.3061	180.489	0	4
4.6466	0.442408	0.502095	44.0484	144.228	0	4
4.63394	0.430575	0.488666	40.2763	185.131	0	4
4.5968	0.605531	0.687226	46.2052	149.022	0	4
5.14911	0.582249	0.660802	67.8379	7.26837	0	4
4.17742	0.473502	0.537384	53.0956	106.78	0	4
3.99247	0.308851	0.35052	34.4953	182.135	0	4
4.43115	0.635779	0.721554	47.4929	118.844	0	4
4.84434	0.698113	0.792298	41.4403	168.89	0	4
4.38857	0.491279	0.557559	113.307	7.52622	0	4
4.78753	0.826972	0.938542	38.2506	182.361	0	4
4.19554	0.57067	0.647661	69.1509	54.06	0	4
4.23227	0.701711	0.796382	38.9584	189.385	0	4
4.57048	0.737922	0.837478	69.1694	46.4508	0	4
4.45208	0.909584	1.0323	55.4593	120.399	0	4
5.16441	0.883946	1.0032	81.3965	73.4786	0	4
5.73117	1.00591	1.14162	82.0325	19.383	0	4
4.97693	0.740018	0.839856	83.7409	37.4556	0	4
4.71756	1.1126	1.2627	60.5802	109.237	0	4
4.92617	1.32215	1.50052	83.4211	15.1786	0	4
4.05693	0.748905	0.849943	57.892	76.2305	0	4
4.67742	0.989538	1.12304	71.9268	62.2609	0	4
5.13517	0.605263	0.686922	45.1471	166.26	0	4
4.58054	0.557416	0.63262	54.4745	87.0506	0	4
4.81735	0.512484	0.581625	48.5585	129.163	0	4
4.76671	0.524909	0.595726	52.1422	152.811	0	4
4.17486	0.40896	0.464134	37.6098	177.859	0	4
4.82291	0.49947	0.566855	77.8303	36.1185	0	4
4.43109	0.734604	0.833712	41.0616	142.907	0	4
4.10541	0.658807	0.74769	39.5978	198.903	0	4
4.93718	1.0798	1.22548	92.4261	9.52607	0	4
5.31867	1.51333	1.7175	58.34	116.049	0	4
4.2879	0.505288	0.573458	89.4712	84.0048	0	4
4.80601	0.99903	1.13381	79.8535	51.6766	0	4
4.71739	0.836384	0.949224	70.4542	14.0433	0	4
4.73386	1.27789	1.45029	57.4951	94.1941	0	4
4.86708	1.5726	1.78476	73.3027	69.4566	0	4
4.50853	0.682303	0.774355	112.812	25.8042	0	4
4.51629	1.35338	1.53597	59.9248	118.72	0	4
4.46792	1.53504	1.74214	56.5064	100.411	0	4
5.24916	1.39949	1.5883	78.1757	5.5348	0	4
4.70655	0.48433	0.549673	42.8006	169.59	0	4
4.12462	0.451952	0.512927	53.6471	81.2607	0	4
4.38845	0.537939	0.610514	50.8981	103.11	0	4
4.61125	0.63625	0.722089	73.1525	63.5645	0	4
3.94616	0.376861	0.427705	62.3631	118.255	0	4
4.52305	0.759519	0.861989	79.6693	17.2364	0	4
4.13797	0.59434	0.674524	40.0696	138.827	0	4
4.51156	0.865948	0.982776	36.8228	158.834	0	4
4.31306	0.547297	0.621135	103.403	4.43306	0	4
4.3697	0.695455	0.789281	48.3985	144.305	0	4
4.1559	0.56882	0.645562	67.0197	57.6859	0	4
4.73973	0.749511	0.85063	77.5401	66.3706	0	4
4.41138	0.793014	0.900003	73.3558	89.8527	0	4
4.77602	0.917798	1.04162	76.9623	70.3693	0	4
4.78069	1.18345	1.34311	73.2993	109.892	0	4
5.05276	1.76619	2.00447	73.0192	95.986	0	4
3.99029	0.61165	0.694171	30.2646	201.104	0	4
4.77197	1.38389	1.5706	78.0533	62.1791	0	4
4.35417	0.633013	0.718415	70.4728	115.968	0	4
4.44386	1.77676	2.01647	56.0183	102.25	0	4
4.57	1.1425	1.29664	75.8775	5.60742	0	4
3.98223	0.64218	0.728819	89.7453	80.1542	0	4
4.51933	1.0783	1.22377	63.3132	80.134	0	4
4.35892	1.16494	1.3221	57.5197	92.343	0	4
4.3652	0.54565	0.619266	59.8346	98.9453	0	4
4.13481	0.448692	0.509227	55.9014	150.29	0	4
5.21781	0.524642	0.595424	41.0922	169.796	0	4
4.80721	0.550624	0.624911	40.7143	182.865	0	4
4.55137	0.577373	0.655269	47.0728	141.11	0	4
[truncated: 2,917 more rows]
