# Supplementary material for: The pattern of nodal morphogen signaling is shaped by co-receptor expression
Source: eLife. 2021 May 26;10:e54894. doi: 10.7554/eLife.54894 (PMC8266389; doi:10.7554/eLife.54894)
Supplement: Supplementary file 2. — This table organizes the PCR primers used for mutant genotyping. Genotyping protocols are described in detail in the Materials and methods section. [file elife-54894-supp2.xlsx]

## Sheet: Sheet1
Name	Sequence	Purpose
NL-102	GGGACGGGAGATTCATAGCA	cyc forward primer
NL-103	ACACATATACCGTAGTACCTGC	cyc reverser primer
NL-96	gccagctgctcgcattttattcc	sqt WT primer
NL-95	gagctttatttcaataactgcgtg	sqt common primer
NL-94	atataaaatcagtacaaccgcccg	sqt mutant primer
NL-89	GCAAAGAAGATATGCACTCAATCATTTATTAAATGG	smad2 forward primer
NL-91	GGGCTCTGAACAAAGATGGCG	smad2 reverse primer
AC102	AGGCCCTCGAGATAAATAACA	oep forward primer
AC103	ACAGCAAACATCAAGAACCTG	oep reverse primer
AC149	CTTGCAGATGTGGATTTCTGGCC	vg1 forward primer
AC150	CATGATGCGATGGTTTGGGTCG	vg1 reverse primer
NL-36	catgtatcaccttccctctgatgtc	lft1 forward primer
NL-37	gcattagcctatatgttaacttgcac	lft1 reverse primer
NL-99	CATTTTGACCACAGCGAT	lft2 WT allele forward primer
NL-100	GTTCATTTTGACCACTCAC	lft2 mutant allele forward primer
NL-101	gaattgtgcataagtaacccacctg	lft2 common reverse primer
